# Supplementary material for: Exploring the Ligninolytic Capabilities of the Oleaginous Yeast Cutaneotrichosporon oleaginosum
Source: Research Square preprint supplement (doi:10.21203/rs.3.rs-6335743/v1), 2025-05-07
Supplement: Supplementary file 1 [file 025b2a6cfeb53daa7cd96a5f.xlsx]

## Sheet: Compiled BLASTp Results
Reference Protein Name/Designation	Abbreviation	Crycu1 JGI Protein ID	Score	EValue	% Hit Coverage	% Hit Identity	BLASTp Query Protein ID	BLASTp Query Genome	Database/Source	Article Reference (DOI)
(Di)methoxyhydroquinone 1,2-dioxygenase	MHQD	350065	989	1.78e-35	0.9109	0.4719	6344291	Phanerochaete chrysosporium RP-78 v4.0	JGI	10.1128/aem.01753-23
(Di)methoxyhydroquinone 1,2-dioxygenase	MHQD	390726	845	4.95e-51	0.7309	0.4701	6344291	Phanerochaete chrysosporium RP-78 v4.0	JGI	10.1128/aem.01753-23
(Di)methoxyhydroquinone 1,2-dioxygenase	MHQD	350065	1063	6.44e-38	0.9198	0.4915	6344326	Phanerochaete chrysosporium RP-78 v4.0	JGI	10.1128/aem.01753-23
(Di)methoxyhydroquinone 1,2-dioxygenase	MHQD	390726	859	5.68e-52	0.709	0.4815	6344326	Phanerochaete chrysosporium RP-78 v4.0	JGI	10.1128/aem.01753-23
1,4-benzoquinone reductase		164578	538	1.21e-32	0.8864	0.5282	101783	Gloeophyllum trabeum v1.0	JGI	10.1128/AEM.68.6.2699-2703.2002
1,4-benzoquinone reductase		380727	361	1.22e-28	0.6818	0.5185	101783	Gloeophyllum trabeum v1.0	JGI	10.1128/AEM.68.6.2699-2703.2002
1,4-benzoquinone reductase		164578	585	1.17e-34	0.8864	0.5692	66940	Gloeophyllum trabeum v1.0	JGI	10.1128/AEM.68.6.2699-2703.2002
1,4-benzoquinone reductase		380727	355	5.14e-27	0.6616	0.5191	66940	Gloeophyllum trabeum v1.0	JGI	10.1128/AEM.68.6.2699-2703.2002
1,4-benzoquinone reductase		164578	543	5.45e-33	0.9227	0.5271	82342	Gloeophyllum trabeum v1.0	JGI	10.1128/AEM.68.6.2699-2703.2002
1,4-benzoquinone reductase		380727	339	2.48e-24	0.7374	0.4521	82342	Gloeophyllum trabeum v1.0	JGI	10.1128/AEM.68.6.2699-2703.2002
1,4-benzoquinone reductase		164578	571	6.2e-31	0.9045	0.5528	6251359	Phanerochaete chrysosporium RP-78 v4.0	JGI	10.1128/aem.61.8.3076-3081.1995
1,4-benzoquinone reductase		380727	353	3.16e-26	0.702	0.4964	6251359	Phanerochaete chrysosporium RP-78 v4.0	JGI	10.1128/aem.61.8.3076-3081.1995
1,4-benzoquinone reductase		164578	544	3.53e-30	0.8864	0.5487	6254130	Phanerochaete chrysosporium RP-78 v4.0	JGI	10.1128/aem.61.8.3076-3081.1995
1,4-benzoquinone reductase		380727	417	8.06e-23	0.904	0.4637	6254130	Phanerochaete chrysosporium RP-78 v4.0	JGI	10.1128/aem.61.8.3076-3081.1995
1,4-benzoquinone reductase		164578	567	4.37e-33	0.8773	0.5596	6356299	Phanerochaete chrysosporium RP-78 v4.0	JGI	10.1128/aem.61.8.3076-3081.1995
1,4-benzoquinone reductase		380727	370	3.47e-29	0.7424	0.483	6356299	Phanerochaete chrysosporium RP-78 v4.0	JGI	10.1128/aem.61.8.3076-3081.1995
1,4-benzoquinone reductase		164578	543	8.96e-32	0.8682	0.555	6373254	Phanerochaete chrysosporium RP-78 v4.0	JGI	10.1128/aem.61.8.3076-3081.1995
1,4-benzoquinone reductase		380727	366	1.38e-28	0.7273	0.4931	6373254	Phanerochaete chrysosporium RP-78 v4.0	JGI	10.1128/aem.61.8.3076-3081.1995
1,4-benzoquinone reductase		164578	500	2.85e-47	0.8864	0.5026	Q59Y37	Candida albicans SN152	Uniprot	10.1371/journal.ppat.1005147
1,4-benzoquinone reductase		380727	344	3.04e-40	0.7071	0.4786	Q59Y37	Candida albicans SN152	Uniprot	10.1371/journal.ppat.1005147
1,4-benzoquinone reductase		164578	576	2.84e-32	0.95	0.5407	124517	Postia placenta MAD 698-R v1.0	JGI	10.1128/aem.00122-24
1,4-benzoquinone reductase		380727	349	3.84e-27	0.7424	0.4558	124517	Postia placenta MAD 698-R v1.0	JGI	10.1128/aem.00122-24
2-hydroxymuconic semialdehyde dehydrogenase		416950	884	7.77e-30	0.7435	0.4679	P19059	Pseudomonas sp. (strain CF600)	Uniprot	10.1016/0167-4781(90)90046-5
2-hydroxymuconic semialdehyde dehydrogenase		374424	718	3.86e-50	0.8099	0.375	P19059	Pseudomonas sp. (strain CF600)	Uniprot	10.1016/0167-4781(90)90046-5
2-hydroxymuconic semialdehyde dehydrogenase		373043	712	2.41e-23	0.6895	0.4181	P19059	Pseudomonas sp. (strain CF600)	Uniprot	10.1016/0167-4781(90)90046-5
2-hydroxymuconic semialdehyde dehydrogenase		390461	687	2.38e-27	0.533	0.4415	P19059	Pseudomonas sp. (strain CF600)	Uniprot	10.1016/0167-4781(90)90046-5
2-hydroxymuconic semialdehyde dehydrogenase		368244	672	1.17e-26	0.8011	0.4564	P19059	Pseudomonas sp. (strain CF600)	Uniprot	10.1016/0167-4781(90)90046-5
2-hydroxymuconic semialdehyde dehydrogenase		368412	661	4.91e-24	0.6452	0.4109	P19059	Pseudomonas sp. (strain CF600)	Uniprot	10.1016/0167-4781(90)90046-5
2-hydroxymuconic semialdehyde dehydrogenase		342066	642	3.03e-26	0.5697	0.4371	P19059	Pseudomonas sp. (strain CF600)	Uniprot	10.1016/0167-4781(90)90046-5
2-hydroxymuconic semialdehyde dehydrogenase		374226	611	3.96e-17	0.6882	0.3618	P19059	Pseudomonas sp. (strain CF600)	Uniprot	10.1016/0167-4781(90)90046-5
2-hydroxymuconic semialdehyde dehydrogenase		372511	597	1.18e-22	0.6599	0.3704	P19059	Pseudomonas sp. (strain CF600)	Uniprot	10.1016/0167-4781(90)90046-5
2-hydroxymuconic semialdehyde dehydrogenase		365260	586	9.17e-28	0.6757	0.3723	P19059	Pseudomonas sp. (strain CF600)	Uniprot	10.1016/0167-4781(90)90046-5
2-hydroxymuconic semialdehyde dehydrogenase		416950	895	3.97e-31	0.7515	0.4709	P23105	Pseudomonas putida KT2440	Uniprot	10.1128/jb.177.5.1196-1201.1995
2-hydroxymuconic semialdehyde dehydrogenase		374424	719	1.86e-51	0.8099	0.3699	P23105	Pseudomonas putida KT2440	Uniprot	10.1128/jb.177.5.1196-1201.1995
2-hydroxymuconic semialdehyde dehydrogenase		390461	692	3.43e-29	0.5401	0.4356	P23105	Pseudomonas putida KT2440	Uniprot	10.1128/jb.177.5.1196-1201.1995
2-hydroxymuconic semialdehyde dehydrogenase		368412	669	1.06e-26	0.6023	0.4466	P23105	Pseudomonas putida KT2440	Uniprot	10.1128/jb.177.5.1196-1201.1995
2-hydroxymuconic semialdehyde dehydrogenase		368244	667	1.86e-25	0.8172	0.4507	P23105	Pseudomonas putida KT2440	Uniprot	10.1128/jb.177.5.1196-1201.1995
2-hydroxymuconic semialdehyde dehydrogenase		342066	653	2e-26	0.6135	0.4253	P23105	Pseudomonas putida KT2440	Uniprot	10.1128/jb.177.5.1196-1201.1995
2-hydroxymuconic semialdehyde dehydrogenase		374226	628	6.98e-17	0.6922	0.3569	P23105	Pseudomonas putida KT2440	Uniprot	10.1128/jb.177.5.1196-1201.1995
2-hydroxymuconic semialdehyde dehydrogenase		365260	626	1.53e-31	0.6757	0.3908	P23105	Pseudomonas putida KT2440	Uniprot	10.1128/jb.177.5.1196-1201.1995
2-hydroxymuconic semialdehyde dehydrogenase		372511	606	8.49e-24	0.6599	0.3611	P23105	Pseudomonas putida KT2440	Uniprot	10.1128/jb.177.5.1196-1201.1995
2-hydroxymuconic semialdehyde dehydrogenase		373043	602	1.17e-23	0.6129	0.3914	P23105	Pseudomonas putida KT2440	Uniprot	10.1128/jb.177.5.1196-1201.1995
3-Hydroxybenzoate 6-monooxygenase	MNX2	382250	734	3.36e-38	0.7506	0.4281	CPAR2_704320	Candida parapsilosis CDC317	Candida Genome Database	10.1099/mic.0.048215-0
3-Hydroxybenzoate 6-monooxygenase	MNX2	349359	259	9.76e-12	0.2761	0.4538	CPAR2_704320	Candida parapsilosis CDC317	Candida Genome Database	10.1099/mic.0.048215-0
3-Hydroxybenzoate 6-monooxygenase	MNX2	419806	249	1.34e-11	0.2916	0.3926	CPAR2_704320	Candida parapsilosis CDC317	Candida Genome Database	10.1099/mic.0.048215-0
3-Hydroxybenzoate 6-monooxygenase	MNX2	362125	224	3.26e-10	0.1942	0.4713	CPAR2_704320	Candida parapsilosis CDC317	Candida Genome Database	10.1099/mic.0.048215-0
3-Hydroxybenzoate 6-monooxygenase	MNX2	417242	123	1.61e-09	0.1244	0.434	CPAR2_704320	Candida parapsilosis CDC317	Candida Genome Database	10.1099/mic.0.048215-0
3-ketoacyl CoA thiolase	katA	337762	1016	4.66e-47	0.9465	0.491		Agaricus bisporus var bisporus (H97) 182344	Lubbers et al. (2021) Supplemental	10.1007/s00253-021-11311-0
3-ketoacyl CoA thiolase	katA	47999	1005	8.88e-69	0.915	0.5225		Agaricus bisporus var bisporus (H97) 182344	Lubbers et al. (2021) Supplemental	10.1007/s00253-021-11311-0
3-ketoacyl CoA thiolase	katA	418649	982	1.64e-86	0.9242	0.4947		Agaricus bisporus var bisporus (H97) 182344	Lubbers et al. (2021) Supplemental	10.1007/s00253-021-11311-0
3-ketoacyl CoA thiolase	katA	368669	920	4.17e-53	0.9471	0.492		Agaricus bisporus var bisporus (H97) 182344	Lubbers et al. (2021) Supplemental	10.1007/s00253-021-11311-0
3-ketoacyl CoA thiolase	katA	367375	888	1.61e-53	0.8696	0.4917		Agaricus bisporus var bisporus (H97) 182344	Lubbers et al. (2021) Supplemental	10.1007/s00253-021-11311-0
3-ketoacyl CoA thiolase	katA	357697	487	5.02e-26	0.6415	0.3802		Agaricus bisporus var bisporus (H97) 182344	Lubbers et al. (2021) Supplemental	10.1007/s00253-021-11311-0
3-ketoacyl CoA thiolase	katA	373707	460	1.5e-23	0.5936	0.4108		Agaricus bisporus var bisporus (H97) 182344	Lubbers et al. (2021) Supplemental	10.1007/s00253-021-11311-0
3-ketoacyl CoA thiolase	katA	416330	84	0.000497	0.0362	0.4667		Agaricus bisporus var bisporus (H97) 182344	Lubbers et al. (2021) Supplemental	10.1007/s00253-021-11311-0
3-ketoacyl CoA thiolase	katA	373707	909	2.41e-42	0.9729	0.4886		Aspergillus japonicus 386139	Lubbers et al. (2021) Supplemental	10.1007/s00253-021-11311-0
3-ketoacyl CoA thiolase	katA	357697	586	2.36e-36	0.7268	0.4295		Aspergillus japonicus 386139	Lubbers et al. (2021) Supplemental	10.1007/s00253-021-11311-0
3-ketoacyl CoA thiolase	katA	368669	540	2.07e-29	0.6851	0.4265		Aspergillus japonicus 386139	Lubbers et al. (2021) Supplemental	10.1007/s00253-021-11311-0
3-ketoacyl CoA thiolase	katA	367375	511	6.51e-28	0.6739	0.3835		Aspergillus japonicus 386139	Lubbers et al. (2021) Supplemental	10.1007/s00253-021-11311-0
3-ketoacyl CoA thiolase	katA	418649	484	7.25e-29	0.6186	0.4071		Aspergillus japonicus 386139	Lubbers et al. (2021) Supplemental	10.1007/s00253-021-11311-0
3-ketoacyl CoA thiolase	katA	47999	479	5.3e-29	0.6165	0.3858		Aspergillus japonicus 386139	Lubbers et al. (2021) Supplemental	10.1007/s00253-021-11311-0
3-ketoacyl CoA thiolase	katA	337762	472	3.79e-23	0.618	0.4252		Aspergillus japonicus 386139	Lubbers et al. (2021) Supplemental	10.1007/s00253-021-11311-0
3-ketoacyl CoA thiolase	katA	368669	859	2.77e-18	0.7935	0.5365		Fusarium oxysporum f. sp. lycopersici 10613	Lubbers et al. (2021) Supplemental	10.1007/s00253-021-11311-0
3-ketoacyl CoA thiolase	katA	367375	829	1e-14	0.7488	0.5355		Fusarium oxysporum f. sp. lycopersici 10613	Lubbers et al. (2021) Supplemental	10.1007/s00253-021-11311-0
3-ketoacyl CoA thiolase	katA	47999	716	2.52e-17	0.6893	0.5035		Fusarium oxysporum f. sp. lycopersici 10613	Lubbers et al. (2021) Supplemental	10.1007/s00253-021-11311-0
3-ketoacyl CoA thiolase	katA	418649	637	2.52e-17	0.5917	0.5248		Fusarium oxysporum f. sp. lycopersici 10613	Lubbers et al. (2021) Supplemental	10.1007/s00253-021-11311-0
3-ketoacyl CoA thiolase	katA	337762	534	1.28e-10	0.6058	0.4458		Fusarium oxysporum f. sp. lycopersici 10613	Lubbers et al. (2021) Supplemental	10.1007/s00253-021-11311-0
3-ketoacyl CoA thiolase	katA	373707	454	1.28e-10	0.6281	0.3725		Fusarium oxysporum f. sp. lycopersici 10613	Lubbers et al. (2021) Supplemental	10.1007/s00253-021-11311-0
3-ketoacyl CoA thiolase	katA	357697	327	1.03e-11	0.3683	0.4172		Fusarium oxysporum f. sp. lycopersici 10613	Lubbers et al. (2021) Supplemental	10.1007/s00253-021-11311-0
3-ketoacyl CoA thiolase	katA	367375	1109	6.12e-41	0.9324	0.557		Penicillium italicum 2985	Lubbers et al. (2021) Supplemental	10.1007/s00253-021-11311-0
3-ketoacyl CoA thiolase	katA	368669	1061	1.73e-44	0.9748	0.5426		Penicillium italicum 2985	Lubbers et al. (2021) Supplemental	10.1007/s00253-021-11311-0
3-ketoacyl CoA thiolase	katA	337762	979	4.45e-44	1.0122	0.4904		Penicillium italicum 2985	Lubbers et al. (2021) Supplemental	10.1007/s00253-021-11311-0
3-ketoacyl CoA thiolase	katA	418649	821	2.4e-38	0.7604	0.5402		Penicillium italicum 2985	Lubbers et al. (2021) Supplemental	10.1007/s00253-021-11311-0
3-ketoacyl CoA thiolase	katA	47999	800	1.42e-39	0.75	0.5113		Penicillium italicum 2985	Lubbers et al. (2021) Supplemental	10.1007/s00253-021-11311-0
3-ketoacyl CoA thiolase	katA	373707	462	9.6e-21	0.5813	0.3983		Penicillium italicum 2985	Lubbers et al. (2021) Supplemental	10.1007/s00253-021-11311-0
3-ketoacyl CoA thiolase	katA	357697	425	3.74e-21	0.5195	0.4085		Penicillium italicum 2985	Lubbers et al. (2021) Supplemental	10.1007/s00253-021-11311-0
3-ketoacyl CoA thiolase	katA	367375	1360	1.54e-178	0.9928	0.6448		Phanerochaete chrysosporium 2976634	Lubbers et al. (2021) Supplemental	10.1007/s00253-021-11311-0
3-ketoacyl CoA thiolase	katA	368669	1160	2.37e-76	0.9748	0.5917		Phanerochaete chrysosporium 2976634	Lubbers et al. (2021) Supplemental	10.1007/s00253-021-11311-0
3-ketoacyl CoA thiolase	katA	47999	1110	8.09e-66	0.9951	0.5317		Phanerochaete chrysosporium 2976634	Lubbers et al. (2021) Supplemental	10.1007/s00253-021-11311-0
3-ketoacyl CoA thiolase	katA	418649	1041	3.29e-60	0.9267	0.5303		Phanerochaete chrysosporium 2976634	Lubbers et al. (2021) Supplemental	10.1007/s00253-021-11311-0
3-ketoacyl CoA thiolase	katA	337762	931	5.79e-40	0.8929	0.4905		Phanerochaete chrysosporium 2976634	Lubbers et al. (2021) Supplemental	10.1007/s00253-021-11311-0
3-ketoacyl CoA thiolase	katA	373707	542	7.85e-27	0.7906	0.3645		Phanerochaete chrysosporium 2976634	Lubbers et al. (2021) Supplemental	10.1007/s00253-021-11311-0
3-ketoacyl CoA thiolase	katA	357697	471	2.06e-23	0.5463	0.4152		Phanerochaete chrysosporium 2976634	Lubbers et al. (2021) Supplemental	10.1007/s00253-021-11311-0
3-ketoacyl CoA thiolase	katA	332863	75	0.00936	0.042	0.2963		Phanerochaete chrysosporium 2976634	Lubbers et al. (2021) Supplemental	10.1007/s00253-021-11311-0
3-ketoacyl CoA thiolase	katA	337762	1063	8.39e-50	0.9489	0.5103		Pleurotus ostreatus 1062741	Lubbers et al. (2021) Supplemental	10.1007/s00253-021-11311-0
3-ketoacyl CoA thiolase	katA	47999	1001	1.21e-69	0.9126	0.5133		Pleurotus ostreatus 1062741	Lubbers et al. (2021) Supplemental	10.1007/s00253-021-11311-0
3-ketoacyl CoA thiolase	katA	418649	972	9.86e-83	0.9413	0.4831		Pleurotus ostreatus 1062741	Lubbers et al. (2021) Supplemental	10.1007/s00253-021-11311-0
3-ketoacyl CoA thiolase	katA	368669	931	5.68e-53	0.932	0.5054		Pleurotus ostreatus 1062741	Lubbers et al. (2021) Supplemental	10.1007/s00253-021-11311-0
3-ketoacyl CoA thiolase	katA	367375	831	2.02e-52	0.843	0.4871		Pleurotus ostreatus 1062741	Lubbers et al. (2021) Supplemental	10.1007/s00253-021-11311-0
3-ketoacyl CoA thiolase	katA	373707	458	3.86e-25	0.5764	0.4103		Pleurotus ostreatus 1062741	Lubbers et al. (2021) Supplemental	10.1007/s00253-021-11311-0
3-ketoacyl CoA thiolase	katA	357697	451	8.49e-23	0.5537	0.4097		Pleurotus ostreatus 1062741	Lubbers et al. (2021) Supplemental	10.1007/s00253-021-11311-0
3-ketoacyl CoA thiolase	katA	368669	1025	1.22e-19	1.0252	0.5061		Trichoderma harzianum 494236	Lubbers et al. (2021) Supplemental	10.1007/s00253-021-11311-0
3-ketoacyl CoA thiolase	katA	367375	978	3.8e-21	0.9275	0.5234		Trichoderma harzianum 494236	Lubbers et al. (2021) Supplemental	10.1007/s00253-021-11311-0
3-ketoacyl CoA thiolase	katA	47999	878	1.39e-17	0.8592	0.4859		Trichoderma harzianum 494236	Lubbers et al. (2021) Supplemental	10.1007/s00253-021-11311-0
3-ketoacyl CoA thiolase	katA	337762	841	1.81e-13	0.8394	0.4957		Trichoderma harzianum 494236	Lubbers et al. (2021) Supplemental	10.1007/s00253-021-11311-0
3-ketoacyl CoA thiolase	katA	418649	698	1.91e-17	0.6748	0.5		Trichoderma harzianum 494236	Lubbers et al. (2021) Supplemental	10.1007/s00253-021-11311-0
3-ketoacyl CoA thiolase	katA	373707	426	4.42e-09	0.5591	0.4009		Trichoderma harzianum 494236	Lubbers et al. (2021) Supplemental	10.1007/s00253-021-11311-0
3-ketoacyl CoA thiolase	katA	357697	422	1.25e-09	0.4951	0.4236		Trichoderma harzianum 494236	Lubbers et al. (2021) Supplemental	10.1007/s00253-021-11311-0
3-ketoacyl CoA thiolase	katA	374328	75	0.00896	0.0911	0.439		Trichoderma harzianum 494236	Lubbers et al. (2021) Supplemental	10.1007/s00253-021-11311-0
3-ketoacyl CoA thiolase	katA	368669	1008	1.32e-19	0.9597	0.5276		Trichoderma reesei 111760	Lubbers et al. (2021) Supplemental	10.1007/s00253-021-11311-0
3-ketoacyl CoA thiolase	katA	367375	977	2.15e-21	0.9082	0.5266		Trichoderma reesei 111760	Lubbers et al. (2021) Supplemental	10.1007/s00253-021-11311-0
3-ketoacyl CoA thiolase	katA	47999	853	1.54e-17	0.8471	0.4728		Trichoderma reesei 111760	Lubbers et al. (2021) Supplemental	10.1007/s00253-021-11311-0
3-ketoacyl CoA thiolase	katA	337762	826	5.36e-13	0.8978	0.4661		Trichoderma reesei 111760	Lubbers et al. (2021) Supplemental	10.1007/s00253-021-11311-0
3-ketoacyl CoA thiolase	katA	418649	655	1.03e-16	0.6675	0.4835		Trichoderma reesei 111760	Lubbers et al. (2021) Supplemental	10.1007/s00253-021-11311-0
3-ketoacyl CoA thiolase	katA	373707	507	5.26e-09	0.6404	0.4038		Trichoderma reesei 111760	Lubbers et al. (2021) Supplemental	10.1007/s00253-021-11311-0
3-ketoacyl CoA thiolase	katA	357697	414	2.03e-09	0.5488	0.3911		Trichoderma reesei 111760	Lubbers et al. (2021) Supplemental	10.1007/s00253-021-11311-0
3-ketoacyl CoA thiolase	katA	370937	82	0.000896	0.0766	0.4444		Trichoderma reesei 111760	Lubbers et al. (2021) Supplemental	10.1007/s00253-021-11311-0
3-ketoacyl CoA thiolase	katA	374328	80	0.00169	0.0844	0.4737		Trichoderma reesei 111760	Lubbers et al. (2021) Supplemental	10.1007/s00253-021-11311-0
3-ketoacyl CoA thiolase	katA	367375	1163	1.11e-106	0.9541	0.5873		Trichoderma reesei 118508	Lubbers et al. (2021) Supplemental	10.1007/s00253-021-11311-0
3-ketoacyl CoA thiolase	katA	368669	1031	3.01e-68	0.9471	0.5559		Trichoderma reesei 118508	Lubbers et al. (2021) Supplemental	10.1007/s00253-021-11311-0
3-ketoacyl CoA thiolase	katA	418649	952	7.09e-53	0.9389	0.5104		Trichoderma reesei 118508	Lubbers et al. (2021) Supplemental	10.1007/s00253-021-11311-0
3-ketoacyl CoA thiolase	katA	47999	910	9.72e-53	0.9976	0.4599		Trichoderma reesei 118508	Lubbers et al. (2021) Supplemental	10.1007/s00253-021-11311-0
3-ketoacyl CoA thiolase	katA	337762	831	2.75e-39	0.8418	0.4798		Trichoderma reesei 118508	Lubbers et al. (2021) Supplemental	10.1007/s00253-021-11311-0
3-ketoacyl CoA thiolase	katA	373707	545	2.75e-32	0.7635	0.3774		Trichoderma reesei 118508	Lubbers et al. (2021) Supplemental	10.1007/s00253-021-11311-0
3-ketoacyl CoA thiolase	katA	357697	440	1.4e-28	0.6098	0.364		Trichoderma reesei 118508	Lubbers et al. (2021) Supplemental	10.1007/s00253-021-11311-0
3-ketoacyl CoA thiolase	katA	418649	1158	9.04e-80	0.9756	0.5764	5990	Aspergillus niger NRRL3	JGI	10.1007/s00253-021-11311-0
3-ketoacyl CoA thiolase	katA	47999	1105	1.35e-80	0.9466	0.5513	5990	Aspergillus niger NRRL3	JGI	10.1007/s00253-021-11311-0
3-ketoacyl CoA thiolase	katA	367375	1097	1.56e-59	0.9469	0.5536	5990	Aspergillus niger NRRL3	JGI	10.1007/s00253-021-11311-0
3-ketoacyl CoA thiolase	katA	337762	1018	1.7e-60	1.0024	0.483	5990	Aspergillus niger NRRL3	JGI	10.1007/s00253-021-11311-0
3-ketoacyl CoA thiolase	katA	368669	980	6.04e-60	0.864	0.5452	5990	Aspergillus niger NRRL3	JGI	10.1007/s00253-021-11311-0
3-ketoacyl CoA thiolase	katA	373707	489	1.28e-30	0.5862	0.4244	5990	Aspergillus niger NRRL3	JGI	10.1007/s00253-021-11311-0
3-ketoacyl CoA thiolase	katA	357697	448	2.17e-25	0.6171	0.3794	5990	Aspergillus niger NRRL3	JGI	10.1007/s00253-021-11311-0
3-ketoacyl CoA thiolase	katA	370937	77	0.00437	0.0766	0.3889	5990	Aspergillus niger NRRL3	JGI	10.1007/s00253-021-11311-0
3-ketoacyl CoA thiolase	katA	367375	1094	6.02e-41	0.9203	0.5591	1526	Aspergillus niger NRRL3	JGI	10.1007/s00253-021-11311-0
3-ketoacyl CoA thiolase	katA	368669	1034	2.79e-43	0.9924	0.5178	1526	Aspergillus niger NRRL3	JGI	10.1007/s00253-021-11311-0
3-ketoacyl CoA thiolase	katA	337762	867	2.04e-29	0.8151	0.5134	1526	Aspergillus niger NRRL3	JGI	10.1007/s00253-021-11311-0
3-ketoacyl CoA thiolase	katA	418649	649	9.45e-39	0.5746	0.5447	1526	Aspergillus niger NRRL3	JGI	10.1007/s00253-021-11311-0
3-ketoacyl CoA thiolase	katA	47999	633	1.03e-39	0.5704	0.5362	1526	Aspergillus niger NRRL3	JGI	10.1007/s00253-021-11311-0
3-ketoacyl CoA thiolase	katA	373707	433	2.14e-19	0.5419	0.4	1526	Aspergillus niger NRRL3	JGI	10.1007/s00253-021-11311-0
3-ketoacyl CoA thiolase	katA	357697	321	1.87e-21	0.378	0.4194	1526	Aspergillus niger NRRL3	JGI	10.1007/s00253-021-11311-0
Aldehyde dehydrogenase with broad range specificity	ALD5	342066	1222	1.52e-45	1	0.498	NP_010996.2	Saccharomyces cerevisiae CEN.PK 102-3A	NCBI	10.1038/srep42635
Aldehyde dehydrogenase with broad range specificity	ALD5	416950	1182	1.29e-43	0.8211	0.523	NP_010996.2	Saccharomyces cerevisiae CEN.PK 102-3A	NCBI	10.1038/srep42635
Aldehyde dehydrogenase with broad range specificity	ALD5	373043	1166	1.9e-40	0.9254	0.5054	NP_010996.2	Saccharomyces cerevisiae CEN.PK 102-3A	NCBI	10.1038/srep42635
Aldehyde dehydrogenase with broad range specificity	ALD5	390461	1140	3.1e-92	0.6702	0.5505	NP_010996.2	Saccharomyces cerevisiae CEN.PK 102-3A	NCBI	10.1038/srep42635
Aldehyde dehydrogenase with broad range specificity	ALD5	368412	975	8.78e-47	0.7602	0.4923	NP_010996.2	Saccharomyces cerevisiae CEN.PK 102-3A	NCBI	10.1038/srep42635
Aldehyde dehydrogenase with broad range specificity	ALD5	368244	906	1.17e-38	0.8898	0.4985	NP_010996.2	Saccharomyces cerevisiae CEN.PK 102-3A	NCBI	10.1038/srep42635
Aldehyde dehydrogenase with broad range specificity	ALD5	372511	812	8.22e-27	0.9715	0.3627	NP_010996.2	Saccharomyces cerevisiae CEN.PK 102-3A	NCBI	10.1038/srep42635
Aldehyde dehydrogenase with broad range specificity	ALD5	374424	719	1.26e-35	0.6798	0.4286	NP_010996.2	Saccharomyces cerevisiae CEN.PK 102-3A	NCBI	10.1038/srep42635
Aldehyde dehydrogenase with broad range specificity	ALD5	374226	651	5.91e-23	0.5569	0.4261	NP_010996.2	Saccharomyces cerevisiae CEN.PK 102-3A	NCBI	10.1038/srep42635
Aldehyde dehydrogenase with broad range specificity	ALD5	365260	647	7.67e-30	0.6445	0.4065	NP_010996.2	Saccharomyces cerevisiae CEN.PK 102-3A	NCBI	10.1038/srep42635
Catechol 1,2-dioxygenase		85172	593	6.51e-47	0.723	0.5327	4787	Aspergillus niger NRRL3	JGI	10.1128/AEM .01786-19
Catechol 1,2-dioxygenase		374756	407	1.43e-27	0.5147	0.4286	4787	Aspergillus niger NRRL3	JGI	10.1128/AEM .01786-19
Catechol 1,2-dioxygenase	HQD2	85172	474	1.49e-33	0.6284	0.4624	P86029	Candida albicans SC5314	Uniprot	10.1007/s00203-006-0187-4
Catechol 1,2-dioxygenase	HQD2	374756	445	1.24e-31	0.6235	0.3868	P86029	Candida albicans SC5314	Uniprot	10.1007/s00203-006-0187-4
Cytochrome P450, putative cinnamate 4-monooxygenase		368902	126	6.09e-10	0.1146	0.4242	AOW02045.1	Yarrowia lipolytica OKYL029	NCBI	10.1186/s13568-023-01590-3
Ferric reductase		368607	410	4.69e-14	0.3489	0.3664	130030	Postia placenta MAD 698-R v1.0	JGI	10.1128/aem.00122-24
Ferric reductase		366398	268	4.58e-13	0.223	0.403	130030	Postia placenta MAD 698-R v1.0	JGI	10.1128/aem.00122-24
Ferric reductase		192320	263	9.22e-15	0.1597	0.5	130030	Postia placenta MAD 698-R v1.0	JGI	10.1128/aem.00122-24
Ferric reductase		417705	175	5.05e-17	0.1367	0.3371	130030	Postia placenta MAD 698-R v1.0	JGI	10.1128/aem.00122-24
Ferric reductase		340566	133	4.35e-11	0.1235	0.3333	130030	Postia placenta MAD 698-R v1.0	JGI	10.1128/aem.00122-24
Ferric reductase		76145	119	4.14e-09	0.1036	0.449	130030	Postia placenta MAD 698-R v1.0	JGI	10.1128/aem.00122-24
Ferric reductase		380072	97	5.32e-06	0.0777	0.3214	130030	Postia placenta MAD 698-R v1.0	JGI	10.1128/aem.00122-24
Feruloyl-CoA synthetase	fcs	376641	504	4.43e-26	0.4602	0.3816	Q9EY88	Amycolatopsis sp. strain HR167	Uniprot	10.1007/s002530000431
Feruloyl-CoA synthetase	fcs	389897	452	7.87e-11	0.5285	0.3468	Q9EY88	Amycolatopsis sp. strain HR167	Uniprot	10.1007/s002530000431
Feruloyl-CoA synthetase	fcs	325384	446	8.4e-26	0.4946	0.3553	Q9EY88	Amycolatopsis sp. strain HR167	Uniprot	10.1007/s002530000431
Feruloyl-CoA synthetase	fcs	344217	398	3.23e-12	0.4577	0.3695	Q9EY88	Amycolatopsis sp. strain HR167	Uniprot	10.1007/s002530000431
Feruloyl-CoA synthetase	fcs	386202	382	2.35e-12	0.4093	0.3783	Q9EY88	Amycolatopsis sp. strain HR167	Uniprot	10.1007/s002530000431
Feruloyl-CoA synthetase	fcs	386597	371	4.45e-12	0.3525	0.3744	Q9EY88	Amycolatopsis sp. strain HR167	Uniprot	10.1007/s002530000431
Feruloyl-CoA synthetase	fcs	346925	363	1.01e-09	0.3277	0.4138	Q9EY88	Amycolatopsis sp. strain HR167	Uniprot	10.1007/s002530000431
Feruloyl-CoA synthetase	fcs	365921	353	1.16e-11	0.4123	0.3447	Q9EY88	Amycolatopsis sp. strain HR167	Uniprot	10.1007/s002530000431
Feruloyl-CoA synthetase	fcs	11599	349	1.3e-22	0.3375	0.4011	Q9EY88	Amycolatopsis sp. strain HR167	Uniprot	10.1007/s002530000431
Feruloyl-CoA synthetase	fcs	380887	342	3.63e-09	0.3791	0.3768	Q9EY88	Amycolatopsis sp. strain HR167	Uniprot	10.1007/s002530000431
Feruloyl-CoA synthetase	fcs	376641	504	4.43e-26	0.4602	0.3816	S5M744	Streptomyces sp. strain V-1	Uniprot	10.1371/journal.pone.0067339
Feruloyl-CoA synthetase	fcs	389897	452	7.87e-11	0.5285	0.3468	S5M744	Streptomyces sp. strain V-1	Uniprot	10.1371/journal.pone.0067339
Feruloyl-CoA synthetase	fcs	325384	446	8.4e-26	0.4946	0.3553	S5M744	Streptomyces sp. strain V-1	Uniprot	10.1371/journal.pone.0067339
Feruloyl-CoA synthetase	fcs	344217	398	3.23e-12	0.4577	0.3695	S5M744	Streptomyces sp. strain V-1	Uniprot	10.1371/journal.pone.0067339
Feruloyl-CoA synthetase	fcs	386202	382	2.35e-12	0.4093	0.3783	S5M744	Streptomyces sp. strain V-1	Uniprot	10.1371/journal.pone.0067339
Feruloyl-CoA synthetase	fcs	386597	371	4.45e-12	0.3525	0.3744	S5M744	Streptomyces sp. strain V-1	Uniprot	10.1371/journal.pone.0067339
Feruloyl-CoA synthetase	fcs	346925	363	1.01e-09	0.3277	0.4138	S5M744	Streptomyces sp. strain V-1	Uniprot	10.1371/journal.pone.0067339
Feruloyl-CoA synthetase	fcs	365921	353	1.16e-11	0.4123	0.3447	S5M744	Streptomyces sp. strain V-1	Uniprot	10.1371/journal.pone.0067339
Feruloyl-CoA synthetase	fcs	11599	349	1.3e-22	0.3375	0.4011	S5M744	Streptomyces sp. strain V-1	Uniprot	10.1371/journal.pone.0067339
Feruloyl-CoA synthetase	fcs	380887	342	3.63e-09	0.3791	0.3768	S5M744	Streptomyces sp. strain V-1	Uniprot	10.1371/journal.pone.0067339
Feruloyl-CoA synthetase	fcs	399511	155	4.48e-14	0.5993	0.2454	Q8RR28	Sphingomonas paucimobilis SYK-6	Uniprot	10.1128/AEM.68.9.4416-4424.2002
Feruloyl-CoA synthetase	fcs	381918	147	5.7e-13	0.3726	0.3061	Q8RR28	Sphingomonas paucimobilis SYK-6	Uniprot	10.1128/AEM.68.9.4416-4424.2002
Feruloyl-CoA synthetase	fcs	414777	136	1.88e-11	0.3755	0.3269	Q8RR28	Sphingomonas paucimobilis SYK-6	Uniprot	10.1128/AEM.68.9.4416-4424.2002
Feruloyl-CoA synthetase	fcs	285275	120	3.05e-09	0.2857	0.3415	Q8RR28	Sphingomonas paucimobilis SYK-6	Uniprot	10.1128/AEM.68.9.4416-4424.2002
Fumarylpyruvate hydrolase	FPH1	154298	676	4.31e-86	0.7517	0.5714	CPAR2_704350	Candida parapsilosis CDC317	Candida Genome Database	10.1099/mic.0.048215-0
Fumarylpyruvate hydrolase	FPH1	369059	530	5.46e-25	0.8103	0.434	CPAR2_704350	Candida parapsilosis CDC317	Candida Genome Database	10.1099/mic.0.048215-0
Fumarylpyruvate hydrolase	FPH1	400009	452	1.32e-23	0.6025	0.433	CPAR2_704350	Candida parapsilosis CDC317	Candida Genome Database	10.1099/mic.0.048215-0
Fumarylpyruvate hydrolase	FPH1	367516	248	1.93e-11	0.4714	0.4486	CPAR2_704350	Candida parapsilosis CDC317	Candida Genome Database	10.1099/mic.0.048215-0
Gentisate 1,2-dioxygenase	GDX1	370475	402	1.46e-23	0.5197	0.6218	CPAR2_704340	Candida parapsilosis CDC317	Candida Genome Database	10.1099/mic.0.048215-0
Hydroquinone hydroxylase (phenol 2-monooxygenase)	MNX3	374925	1076	2.18e-54	0.5444	0.5442	CPAR2_205970	Candida parapsilosis CDC317	Candida Genome Database	10.1099/mic.0.048215-0
Hydroquinone hydroxylase (phenol 2-monooxygenase)	MNX3	391320	1039	3.13e-49	0.1828	0.5167	CPAR2_205970	Candida parapsilosis CDC317	Candida Genome Database	10.1099/mic.0.048215-0
Hydroquinone hydroxylase (phenol 2-monooxygenase)	MNX3	370517	771	1.21e-32	0.4598	0.4646	CPAR2_205970	Candida parapsilosis CDC317	Candida Genome Database	10.1099/mic.0.048215-0
Hydroquinone hydroxylase (phenol 2-monooxygenase)	MNX3	344152	382	2.8e-24	0.2489	0.4294	CPAR2_205970	Candida parapsilosis CDC317	Candida Genome Database	10.1099/mic.0.048215-0
Hydroquinone hydroxylase (phenol 2-monooxygenase)	MNX3	222522	162	8.43e-15	0.1256	0.44	CPAR2_205970	Candida parapsilosis CDC317	Candida Genome Database	10.1099/mic.0.048215-0
Hydroquinone hydroxylase (phenol 2-monooxygenase)	MNX3	263751	124	1.67e-09	0.0986	0.4364	CPAR2_205970	Candida parapsilosis CDC317	Candida Genome Database	10.1099/mic.0.048215-0
Hydroxycinnamate-CoA synthase	hscA	11599	250	2.19e-05	0.3592	0.3065		Aspergillus clavatus 3084	Lubbers et al. (2021) Supplemental	10.1007/s00253-021-11311-0
Hydroxycinnamate-CoA synthase	hscA	367818	201	1.42e-09	0.2916	0.2424		Aspergillus clavatus 3084	Lubbers et al. (2021) Supplemental	10.1007/s00253-021-11311-0
Hydroxycinnamate-CoA synthase	hscA	418586	188	6.72e-08	0.2496	0.3092		Aspergillus clavatus 3084	Lubbers et al. (2021) Supplemental	10.1007/s00253-021-11311-0
Hydroxycinnamate-CoA synthase	hscA	382167	137	2.17e-11	0.1331	0.3718		Aspergillus clavatus 3084	Lubbers et al. (2021) Supplemental	10.1007/s00253-021-11311-0
Hydroxycinnamate-CoA synthase	hscA	380355	128	3.92e-10	0.1471	0.3222		Aspergillus clavatus 3084	Lubbers et al. (2021) Supplemental	10.1007/s00253-021-11311-0
Hydroxycinnamate-CoA synthase	hscA	418602	117	1.35e-08	0.0721	0.2911		Aspergillus clavatus 3084	Lubbers et al. (2021) Supplemental	10.1007/s00253-021-11311-0
Hydroxycinnamate-CoA synthase	hscA	278966	116	1.86e-08	0.144	0.3034		Aspergillus clavatus 3084	Lubbers et al. (2021) Supplemental	10.1007/s00253-021-11311-0
Hydroxycinnamate-CoA synthase	hscA	163577	113	4.87e-08	0.1296	0.3077		Aspergillus clavatus 3084	Lubbers et al. (2021) Supplemental	10.1007/s00253-021-11311-0
Hydroxycinnamate-CoA synthase	hscA	414732	111	9.26e-08	0.1295	0.3038		Aspergillus clavatus 3084	Lubbers et al. (2021) Supplemental	10.1007/s00253-021-11311-0
Hydroxycinnamate-CoA synthase	hscA	399347	110	1.28e-07	0.1343	0.2716		Aspergillus clavatus 3084	Lubbers et al. (2021) Supplemental	10.1007/s00253-021-11311-0
Hydroxycinnamate-CoA synthase	hscA	340123	262	5e-07	0.2832	0.3657		Aspergillus luchuensis 47144	Lubbers et al. (2021) Supplemental	10.1007/s00253-021-11311-0
Hydroxycinnamate-CoA synthase	hscA	386202	257	6.49e-06	0.3025	0.3353		Aspergillus luchuensis 47144	Lubbers et al. (2021) Supplemental	10.1007/s00253-021-11311-0
Hydroxycinnamate-CoA synthase	hscA	367818	236	0.000575	0.2592	0.3182		Aspergillus luchuensis 47144	Lubbers et al. (2021) Supplemental	10.1007/s00253-021-11311-0
Hydroxycinnamate-CoA synthase	hscA	374162	216	2.16e-09	0.3084	0.3058		Aspergillus luchuensis 47144	Lubbers et al. (2021) Supplemental	10.1007/s00253-021-11311-0
Hydroxycinnamate-CoA synthase	hscA	344217	189	1.23e-05	0.2353	0.3359		Aspergillus luchuensis 47144	Lubbers et al. (2021) Supplemental	10.1007/s00253-021-11311-0
Hydroxycinnamate-CoA synthase	hscA	418586	187	1.7e-05	0.2562	0.3077		Aspergillus luchuensis 47144	Lubbers et al. (2021) Supplemental	10.1007/s00253-021-11311-0
Hydroxycinnamate-CoA synthase	hscA	11599	166	0.000792	0.2112	0.3248		Aspergillus luchuensis 47144	Lubbers et al. (2021) Supplemental	10.1007/s00253-021-11311-0
Hydroxycinnamate-CoA synthase	hscA	382167	138	1.77e-11	0.1331	0.4103		Aspergillus luchuensis 47144	Lubbers et al. (2021) Supplemental	10.1007/s00253-021-11311-0
Hydroxycinnamate-CoA synthase	hscA	380355	134	6.37e-11	0.1275	0.3846		Aspergillus luchuensis 47144	Lubbers et al. (2021) Supplemental	10.1007/s00253-021-11311-0
Hydroxycinnamate-CoA synthase	hscA	278966	132	1.21e-10	0.1262	0.3974		Aspergillus luchuensis 47144	Lubbers et al. (2021) Supplemental	10.1007/s00253-021-11311-0
Hydroxycinnamate-CoA synthase	hscA	374162	207	6.37e-09	0.2275	0.3158		Aspergillus oryzae 670	Lubbers et al. (2021) Supplemental	10.1007/s00253-021-11311-0
Hydroxycinnamate-CoA synthase	hscA	418586	182	2.76e-06	0.2315	0.3191		Aspergillus oryzae 670	Lubbers et al. (2021) Supplemental	10.1007/s00253-021-11311-0
Hydroxycinnamate-CoA synthase	hscA	340123	175	1.37e-05	0.2087	0.3178		Aspergillus oryzae 670	Lubbers et al. (2021) Supplemental	10.1007/s00253-021-11311-0
Hydroxycinnamate-CoA synthase	hscA	371408	110	1.56e-07	0.1466	0.2809		Aspergillus oryzae 670	Lubbers et al. (2021) Supplemental	10.1007/s00253-021-11311-0
Hydroxycinnamate-CoA synthase	hscA	414732	99	5.24e-06	0.1033	0.3333		Aspergillus oryzae 670	Lubbers et al. (2021) Supplemental	10.1007/s00253-021-11311-0
Hydroxycinnamate-CoA synthase	hscA	386597	96	1.37e-05	0.087	0.3571		Aspergillus oryzae 670	Lubbers et al. (2021) Supplemental	10.1007/s00253-021-11311-0
Hydroxycinnamate-CoA synthase	hscA	380355	92	4.91e-05	0.1176	0.2917		Aspergillus oryzae 670	Lubbers et al. (2021) Supplemental	10.1007/s00253-021-11311-0
Hydroxycinnamate-CoA synthase	hscA	365921	90	9.3e-05	0.0982	0.3393		Aspergillus oryzae 670	Lubbers et al. (2021) Supplemental	10.1007/s00253-021-11311-0
Hydroxycinnamate-CoA synthase	hscA	325384	90	9.3e-05	0.1014	0.3393		Aspergillus oryzae 670	Lubbers et al. (2021) Supplemental	10.1007/s00253-021-11311-0
Hydroxycinnamate-CoA synthase	hscA	278966	89	0.000128	0.11	0.25		Aspergillus oryzae 670	Lubbers et al. (2021) Supplemental	10.1007/s00253-021-11311-0
Hydroxycinnamate-CoA synthase	hscA	367818	270	2.8e-07	0.243	0.3576		Penicillium italicum 8261	Lubbers et al. (2021) Supplemental	10.1007/s00253-021-11311-0
Hydroxycinnamate-CoA synthase	hscA	386202	242	0.000122	0.3399	0.3037		Penicillium italicum 8261	Lubbers et al. (2021) Supplemental	10.1007/s00253-021-11311-0
Hydroxycinnamate-CoA synthase	hscA	366567	198	3.17e-09	0.1829	0.3784		Penicillium italicum 8261	Lubbers et al. (2021) Supplemental	10.1007/s00253-021-11311-0
Hydroxycinnamate-CoA synthase	hscA	418586	193	2.16e-08	0.2463	0.34		Penicillium italicum 8261	Lubbers et al. (2021) Supplemental	10.1007/s00253-021-11311-0
Hydroxycinnamate-CoA synthase	hscA	369357	186	1.91e-06	0.2705	0.2895		Penicillium italicum 8261	Lubbers et al. (2021) Supplemental	10.1007/s00253-021-11311-0
Hydroxycinnamate-CoA synthase	hscA	344217	180	3.39e-05	0.25	0.3235		Penicillium italicum 8261	Lubbers et al. (2021) Supplemental	10.1007/s00253-021-11311-0
Hydroxycinnamate-CoA synthase	hscA	380887	180	1.91e-06	0.2436	0.3083		Penicillium italicum 8261	Lubbers et al. (2021) Supplemental	10.1007/s00253-021-11311-0
Hydroxycinnamate-CoA synthase	hscA	11599	179	8.86e-05	0.2401	0.3158		Penicillium italicum 8261	Lubbers et al. (2021) Supplemental	10.1007/s00253-021-11311-0
Hydroxycinnamate-CoA synthase	hscA	370579	175	8.86e-05	0.2541	0.2908		Penicillium italicum 8261	Lubbers et al. (2021) Supplemental	10.1007/s00253-021-11311-0
Hydroxycinnamate-CoA synthase	hscA	365921	170	6.44e-05	0.2281	0.3		Penicillium italicum 8261	Lubbers et al. (2021) Supplemental	10.1007/s00253-021-11311-0
Hydroxycinnamate-CoA synthase	hscA	386202	198	5.91e-07	0.2438	0.365	5989	Aspergillus niger NRRL3	JGI	10.1007/s00253-021-11311-0
Hydroxycinnamate-CoA synthase	hscA	380355	193	8.13e-07	0.2925	0.2682	5989	Aspergillus niger NRRL3	JGI	10.1007/s00253-021-11311-0
Hydroxycinnamate-CoA synthase	hscA	11599	192	5.91e-07	0.2798	0.329	5989	Aspergillus niger NRRL3	JGI	10.1007/s00253-021-11311-0
Hydroxycinnamate-CoA synthase	hscA	369357	180	7.05e-05	0.2491	0.3286	5989	Aspergillus niger NRRL3	JGI	10.1007/s00253-021-11311-0
Hydroxycinnamate-CoA synthase	hscA	380887	166	9.69e-05	0.2399	0.3282	5989	Aspergillus niger NRRL3	JGI	10.1007/s00253-021-11311-0
Hydroxycinnamate-CoA synthase	hscA	418602	113	6.34e-08	0.0749	0.2683	5989	Aspergillus niger NRRL3	JGI	10.1007/s00253-021-11311-0
Hydroxycinnamate-CoA synthase	hscA	418586	112	8.73e-08	0.1396	0.3059	5989	Aspergillus niger NRRL3	JGI	10.1007/s00253-021-11311-0
Hydroxycinnamate-CoA synthase	hscA	344217	110	1.65e-07	0.1011	0.4182	5989	Aspergillus niger NRRL3	JGI	10.1007/s00253-021-11311-0
Hydroxycinnamate-CoA synthase	hscA	374162	108	3.12e-07	0.1317	0.2955	5989	Aspergillus niger NRRL3	JGI	10.1007/s00253-021-11311-0
Hydroxycinnamate-CoA synthase	hscA	163577	107	4.3e-07	0.1163	0.3143	5989	Aspergillus niger NRRL3	JGI	10.1007/s00253-021-11311-0
Hydroxycinnamoyl-CoA hydratase-lyase	HCHL	414777	94	1.16e-05	0.3791	0.219	O69762	Pseudomonas fluorescens strain AN103	Uniprot	10.1006/abbi.1999.1140
Hydroxycinnamoyl-CoA hydratase-lyase	HCHL	399511	246	2.19e-05	0.5515	0.3133	O69762	Pseudomonas fluorescens strain AN103	Uniprot	10.1006/abbi.1999.1140
Hydroxycinnamoyl-CoA hydratase-lyase	HCHL	383849	96	6.13e-06	0.2008	0.2525	O69762	Pseudomonas fluorescens strain AN103	Uniprot	10.1006/abbi.1999.1140
Hydroxycinnamoyl-CoA hydratase-lyase	HCHL	381918	253	4.35e-14	0.5856	0.3442	O69762	Pseudomonas fluorescens strain AN103	Uniprot	10.1006/abbi.1999.1140
Hydroxycinnamoyl-CoA hydratase-lyase	HCHL	370863	85	0.000202	0.1489	0.3571	O69762	Pseudomonas fluorescens strain AN103	Uniprot	10.1006/abbi.1999.1140
Hydroxycinnamoyl-CoA hydratase-lyase	HCHL	370259	75	0.00487	0.0909	0.5417	O69762	Pseudomonas fluorescens strain AN103	Uniprot	10.1006/abbi.1999.1140
Hydroxycinnamoyl-CoA hydratase-lyase	HCHL	366765	90	4.13e-05	0.1758	0.3958	O69762	Pseudomonas fluorescens strain AN103	Uniprot	10.1006/abbi.1999.1140
Hydroxycinnamoyl-CoA hydratase-lyase	HCHL	324963	90	4.13e-05	0.2027	0.322	O69762	Pseudomonas fluorescens strain AN103	Uniprot	10.1006/abbi.1999.1140
Hydroxycinnamoyl-CoA hydratase-lyase	HCHL	285275	121	2.16e-09	0.2857	0.3293	O69762	Pseudomonas fluorescens strain AN103	Uniprot	10.1006/abbi.1999.1140
Hydroxycinnamoyl-CoA hydratase-lyase	HCHL	414777	136	1.88e-11	0.3755	0.3269	Q8RR28	Sphingomonas paucimobilis SYK-6	Uniprot	10.1128/AEM.68.9.4416–4424.2002
Hydroxycinnamoyl-CoA hydratase-lyase	HCHL	399511	155	4.48e-14	0.5993	0.2454	Q8RR28	Sphingomonas paucimobilis SYK-6	Uniprot	10.1128/AEM.68.9.4416–4424.2002
Hydroxycinnamoyl-CoA hydratase-lyase	HCHL	381918	147	5.7e-13	0.3726	0.3061	Q8RR28	Sphingomonas paucimobilis SYK-6	Uniprot	10.1128/AEM.68.9.4416–4424.2002
Hydroxycinnamoyl-CoA hydratase-lyase	HCHL	285275	120	3.05e-09	0.2857	0.3415	Q8RR28	Sphingomonas paucimobilis SYK-6	Uniprot	10.1128/AEM.68.9.4416–4424.2002
Hydroxyquinol 1,2-dioxygenase		374756	755	2.25e-58	0.7441	0.5336	2644	Aspergillus niger NRRL3	JGI	10.1128/AEM .01786-19
Hydroxyquinol 1,2-dioxygenase		85172	406	6.02e-29	0.7432	0.3545	2644	Aspergillus niger NRRL3	JGI	10.1128/AEM .01786-19
Hydroxyquinol 1,2-dioxygenase		374756	729	1.64e-37	0.7647	0.5	5330	Aspergillus niger NRRL3	JGI	10.1128/AEM .01786-19
Hydroxyquinol 1,2-dioxygenase		85172	428	3.18e-33	0.6892	0.3873	5330	Aspergillus niger NRRL3	JGI	10.1128/AEM .01786-19
Hydroxyquinol 1,2-dioxygenase	HDX1	374756	724	5.29e-54	0.7529	0.4961	CPAR2_406440	Candida parapsilosis CDC317	Candida Genome Database	10.1099/mic.0.048215-0
Hydroxyquinol 1,2-dioxygenase	HDX1	85172	430	5.53e-34	0.6926	0.3854	CPAR2_406440	Candida parapsilosis CDC317	Candida Genome Database	10.1099/mic.0.048215-0
Hydroxyquinol 1,2-dioxygenase		374756	829	3.33e-59	0.8647	0.5238	116134	Fusarium fujikuroi IMI 58289	JGI	10.1073/pnas.2017381118
Hydroxyquinol 1,2-dioxygenase		85172	445	7.04e-34	0.7601	0.3556	116134	Fusarium fujikuroi IMI 58289	JGI	10.1073/pnas.2017381118
Hydroxyquinol 1,2-dioxygenase		374756	800	1.28e-54	0.8118	0.5471	28066	Trametes versicolor v1.0	JGI	10.1073/pnas.2017381118
Hydroxyquinol 1,2-dioxygenase		85172	385	5.4e-30	0.75	0.3288	28066	Trametes versicolor v1.0	JGI	10.1073/pnas.2017381118
Laccase (AA1)	Lac	369862	403	3.23e-13	0.3505	0.3556	Q12717	Trametes versicolor strain 52	Uniprot	10.1016/S0378-1119(97)00215-1
Laccase (AA1)	Lac	326575	331	1.73e-09	0.2649	0.4436	Q12717	Trametes versicolor strain 52	Uniprot	10.1016/S0378-1119(97)00215-1
Laccase (AA1)	Lac	372508	307	4.03e-20	0.2394	0.3947	Q12717	Trametes versicolor strain 52	Uniprot	10.1016/S0378-1119(97)00215-1
Laccase (AA1)	Lac	416150	255	1.71e-13	0.2101	0.3798	Q12717	Trametes versicolor strain 52	Uniprot	10.1016/S0378-1119(97)00215-1
Laccase (AA1)	Lac	368910	206	8.21e-21	0.107	0.4217	Q12717	Trametes versicolor strain 52	Uniprot	10.1016/S0378-1119(97)00215-1
Laccase (AA1)	Lac	326575	441	2.6e-11	0.3526	0.4407	Q12718	Trametes versicolor strain 52	Uniprot	10.1016/S0378-1119(97)00215-1
Laccase (AA1)	Lac	369862	423	7.64e-13	0.3193	0.4049	Q12718	Trametes versicolor strain 52	Uniprot	10.1016/S0378-1119(97)00215-1
Laccase (AA1)	Lac	416150	343	7.21e-12	0.2638	0.3889	Q12718	Trametes versicolor strain 52	Uniprot	10.1016/S0378-1119(97)00215-1
Laccase (AA1)	Lac	372508	315	1.21e-20	0.2331	0.4122	Q12718	Trametes versicolor strain 52	Uniprot	10.1016/S0378-1119(97)00215-1
Laccase (AA1)	Lac	368910	310	2.3e-20	0.1959	0.3618	Q12718	Trametes versicolor strain 52	Uniprot	10.1016/S0378-1119(97)00215-1
Laccase (AA1)	Lac	326575	449	2.44e-10	0.3765	0.4392	Q12719	Trametes versicolor PRL 572	Uniprot	10.1016/0167-4838(95)00104-3
Laccase (AA1)	Lac	372508	413	5.18e-20	0.3087	0.4082	Q12719	Trametes versicolor PRL 572	Uniprot	10.1016/0167-4838(95)00104-3
Laccase (AA1)	Lac	368910	411	1.06e-20	0.2552	0.3737	Q12719	Trametes versicolor PRL 572	Uniprot	10.1016/0167-4838(95)00104-3
Laccase (AA1)	Lac	369862	408	8.57e-14	0.352	0.3628	Q12719	Trametes versicolor PRL 572	Uniprot	10.1016/0167-4838(95)00104-3
Laccase (AA1)	Lac	416150	372	1.5e-12	0.2459	0.4238	Q12719	Trametes versicolor PRL 572	Uniprot	10.1016/0167-4838(95)00104-3
Maleylacetate reductase		373930	772	1.06e-98	0.6359	0.6211	4956	Aspergillus niger NRRL3	JGI	10.1186/s12934-021-01643-x
Maleylacetate reductase		374156	398	3.65e-25	0.4149	0.641	406430	C. parapsilosis strains CLIB214	Candida Genome Database	10.1371/journal.pgen.1009815
Muconate cycloisomerase		414883	1793	1.78e-74	0.8674	0.5971	J4UJS3	Trichosporon asahii var. asahii CBS 2479	Uniprot	10.1016/j.fgb.2014.11.002
Muconate cycloisomerase		414883	1818	0	0.5835	0.885	P46057	Cutaneotrichosporon cutaneum ATCC 58094	Uniprot	10.1021/bi00173a045
Muconate cycloisomerase		414883	1793	1.78e-74	0.8674	0.5971	K1WN17	Trichosporon asahii var. asahii CBS 8904	Uniprot	10.1128/EC.00264-12
Muconolactone isomerase		369033	329	3.04e-23	0.8382	0.5175	J6F4W4	Trichosporon asahii var. asahii CBS 2479	Uniprot	10.1016/j.fgb.2014.11.002
Muconolactone isomerase		418017	127	1.52e-10	0.6378	0.3333	J6F4W4	Trichosporon asahii var. asahii CBS 2479	Uniprot	10.1016/j.fgb.2014.11.002
Muconolactone isomerase		369033	103	3.96e-07	0.375	0.451	Q5B5W9	Aspergillus nidulans FGSC A4	Uniprot	10.1016/j.fgb.2014.11.002
β-ketoadipate enol-lactone hydrolase		414883	312	1.48e-17	0.2621	0.3988	EAA60874.1	Aspergillus nidulans FGSC A4	NCBI	10.1016/j.fgb.2014.11.002
β-ketoadipate enol-lactone hydrolase		414883	279	7.23e-17	0.2434	0.3718	4788	Aspergillus niger NRRL3	JGI	10.1128/AEM.02701-20
β-ketoadipate enol-lactone hydrolase		375069	96	5.83e-06	0.3103	0.2444	4788	Aspergillus niger NRRL3	JGI	10.1128/AEM.02701-20
Multifunctional β-oxidation hydratase/dehydrogenase	foxA	385434	3793	7.58e-85	1.5312	0.5149		Tuber borchii 1102499	Lubbers et al. (2021) Supplemental	10.1007/s00253-021-11311-0
Multifunctional β-oxidation hydratase/dehydrogenase	foxA	233545	2623	5.39e-74	1.7136	0.4819		Tuber borchii 1102499	Lubbers et al. (2021) Supplemental	10.1007/s00253-021-11311-0
Multifunctional β-oxidation hydratase/dehydrogenase	foxA	374051	398	5.22e-20	0.8833	0.348		Tuber borchii 1102499	Lubbers et al. (2021) Supplemental	10.1007/s00253-021-11311-0
Multifunctional β-oxidation hydratase/dehydrogenase	foxA	368866	254	0.000238	0.581	0.415		Tuber borchii 1102499	Lubbers et al. (2021) Supplemental	10.1007/s00253-021-11311-0
Multifunctional β-oxidation hydratase/dehydrogenase	foxA	371673	210	1.65e-07	0.2466	0.589		Tuber borchii 1102499	Lubbers et al. (2021) Supplemental	10.1007/s00253-021-11311-0
Multifunctional β-oxidation hydratase/dehydrogenase	foxA	57067	208	1.2e-07	0.414	0.2697		Tuber borchii 1102499	Lubbers et al. (2021) Supplemental	10.1007/s00253-021-11311-0
Multifunctional β-oxidation hydratase/dehydrogenase	foxA	372541	194	1.01e-05	0.3091	0.4412		Tuber borchii 1102499	Lubbers et al. (2021) Supplemental	10.1007/s00253-021-11311-0
Multifunctional β-oxidation hydratase/dehydrogenase	foxA	374066	188	3.57e-05	0.6877	0.2919		Tuber borchii 1102499	Lubbers et al. (2021) Supplemental	10.1007/s00253-021-11311-0
Multifunctional β-oxidation hydratase/dehydrogenase	foxA	403547	179	9.23e-05	0.5679	0.3252		Tuber borchii 1102499	Lubbers et al. (2021) Supplemental	10.1007/s00253-021-11311-0
Multifunctional β-oxidation hydratase/dehydrogenase	foxA	347609	176	6.72e-05	0.4978	0.3894		Tuber borchii 1102499	Lubbers et al. (2021) Supplemental	10.1007/s00253-021-11311-0
Multifunctional β-oxidation hydratase/dehydrogenase	foxA	385434	3416	1.52e-82	1.3909	0.5084	672	Aspergillus niger NRRL3	JGI	10.1007/s00253-021-11311-0
Multifunctional β-oxidation hydratase/dehydrogenase	foxA	233545	2385	2.44e-73	1.5209	0.4923	672	Aspergillus niger NRRL3	JGI	10.1007/s00253-021-11311-0
Multifunctional β-oxidation hydratase/dehydrogenase	foxA	374051	468	1.08e-24	0.8833	0.4009	672	Aspergillus niger NRRL3	JGI	10.1007/s00253-021-11311-0
Multifunctional β-oxidation hydratase/dehydrogenase	foxA	57067	223	2.45e-08	0.4442	0.2775	672	Aspergillus niger NRRL3	JGI	10.1007/s00253-021-11311-0
Multifunctional β-oxidation hydratase/dehydrogenase	foxA	370267	126	1.94e-09	0.2958	0.3478	672	Aspergillus niger NRRL3	JGI	10.1007/s00253-021-11311-0
Multifunctional β-oxidation hydratase/dehydrogenase	foxA	373112	113	1.19e-07	0.1294	0.55	672	Aspergillus niger NRRL3	JGI	10.1007/s00253-021-11311-0
Multifunctional β-oxidation hydratase/dehydrogenase	foxA	372541	104	2.05e-06	0.1545	0.451	672	Aspergillus niger NRRL3	JGI	10.1007/s00253-021-11311-0
Multifunctional β-oxidation hydratase/dehydrogenase	foxA	342326	101	5.3e-06	0.2	0.4038	672	Aspergillus niger NRRL3	JGI	10.1007/s00253-021-11311-0
Multifunctional β-oxidation hydratase/dehydrogenase	foxA	371673	101	5.3e-06	0.1216	0.5	672	Aspergillus niger NRRL3	JGI	10.1007/s00253-021-11311-0
Multifunctional β-oxidation hydratase/dehydrogenase	foxA	394241	99	9.98e-06	0.3556	0.2604	672	Aspergillus niger NRRL3	JGI	10.1007/s00253-021-11311-0
Peroxidase (AA2 Class I, putative Class II)	LiP	382630	1278	8.83e-155	0.9045	0.7205	42475	Tremella mesenterica Fries v1.0	JGI	10.3389/ffunb.2022.837605
Peroxidase (AA2 Class I, putative Class II)	LiP	372514	816	4.31e-40	0.8395	0.5976	42475	Tremella mesenterica Fries v1.0	JGI	10.3389/ffunb.2022.837605
Peroxidase (AA2 Class I, putative Class II)	LiP	372514	1131	1.11e-79	0.9264	0.7545	33689	Tremella mesenterica Fries v1.0	JGI	10.3389/ffunb.2022.837605
Peroxidase (AA2 Class I, putative Class II)	LiP	382630	774	4.24e-35	0.7107	0.5573	33689	Tremella mesenterica Fries v1.0	JGI	10.3389/ffunb.2022.837605
Peroxidase (AA2 Class I, putative Class II)	LiP	382630	1080	1.19e-127	0.9494	0.5888	26601	Trametes versicolor v1.0	JGI	10.3389/ffunb.2022.837605
Peroxidase (AA2 Class I, putative Class II)	LiP	372514	818	6.45e-41	0.7559	0.6416	26601	Trametes versicolor v1.0	JGI	10.3389/ffunb.2022.837605
Peroxidase (AA2 Class I, putative Class II)	LiP	382630	1028	1.13e-120	0.8961	0.5925	6233540	Phanerochaete chrysosporium RP-78 v4.0	JGI
Peroxidase (AA2 Class I, putative Class II)	LiP	372514	743	4.95e-37	0.7525	0.6089	6233540	Phanerochaete chrysosporium RP-78 v4.0	JGI
Peroxidase (AA2 Class I, putative Class II)	LiP	372514	479	7.38e-174	0.9753	0.92181	BEI80929.1	Cutaneotrichosporon cavernicola HIS002	NCBI	10.1186/s12864-023-09718-2
Peroxidase (AA2 Class I, putative Class II)	LiP	372514	577	0	0.973	0.92905	BEI88732.1	Cutaneotrichosporon cavernicola HIS019	NCBI	10.1186/s12864-023-09718-2
Peroxidase (AA2 Class I, putative Class II)	LiP	372514	288	2.78e-96	0.6718	0.55344	BEI88523.1	Cutaneotrichosporon cavernicola HIS019	NCBI	10.1186/s12864-023-09718-2
Peroxidase (AA2 Class I, putative Class II)	LiP	372514	577	0	0.973	0.92905	BEI96506.1	Cutaneotrichosporon cavernicola HIS631	NCBI	10.1186/s12864-023-09718-2
Peroxidase (AA2 Class I, putative Class II)	LiP	372514	288	2.78e-96	0.6718	0.55344	BEI96296.1	Cutaneotrichosporon cavernicola HIS631	NCBI	10.1186/s12864-023-09718-2
Peroxidase (AA2 Class I, putative Class II)	LiP	372514	290	6.62e-94	0.673	0.55513	BEJ04067.1	Cutaneotrichosporon cavernicola HIS641	NCBI	10.1186/s12864-023-09718-2
Peroxidase (AA2 Class I, putative Class II)	LiP	372514	577	0	0.973	0.92905	BEJ04277.1	Cutaneotrichosporon cavernicola HIS641	NCBI	10.1186/s12864-023-09718-2
Peroxidase (AA2 Class I, putative Class II)	LiP	372514	574	0	0.973	0.91892	BEJ11632.1	Cutaneotrichosporon sp. HIS471	NCBI	10.1186/s12864-023-09718-2
Peroxidase (AA2 Class I, putative Class II)	LiP	372514	292	4.1e-98	0.6718	0.56489	BEJ17620.1	Cutaneotrichosporon sp. HIS471	NCBI	10.1186/s12864-023-09718-2
Peroxidase (AA2 Class I, putative Class II)	LiP	382630	273	9.95e-92	0.6559	0.55466	BEI80929.1	Cutaneotrichosporon cavernicola HIS002	NCBI	10.1186/s12864-023-09718-2
Peroxidase (AA2 Class I, putative Class II)	LiP	382630	300	1.96e-101	0.6755	0.56226	BEI88732.1	Cutaneotrichosporon cavernicola HIS019	NCBI	10.1186/s12864-023-09718-2
Peroxidase (AA2 Class I, putative Class II)	LiP	382630	591	0	0.9213	0.83989	BEI88523.1	Cutaneotrichosporon cavernicola HIS019	NCBI	10.1186/s12864-023-09718-2
Peroxidase (AA2 Class I, putative Class II)	LiP	382630	300	2.57e-101	0.6755	0.56226	BEI96506.1	Cutaneotrichosporon cavernicola HIS631	NCBI	10.1186/s12864-023-09718-2
Peroxidase (AA2 Class I, putative Class II)	LiP	382630	591	0	0.9213	0.83989	BEI96296.1	Cutaneotrichosporon cavernicola HIS631	NCBI	10.1186/s12864-023-09718-2
Peroxidase (AA2 Class I, putative Class II)	LiP	382630	595	0	0.9213	0.83989	BEJ04067.1	Cutaneotrichosporon cavernicola HIS641	NCBI	10.1186/s12864-023-09718-2
Peroxidase (AA2 Class I, putative Class II)	LiP	382630	300	2.57e-101	0.6755	0.56226	BEJ04277.1	Cutaneotrichosporon cavernicola HIS641	NCBI	10.1186/s12864-023-09718-2
Peroxidase (AA2 Class I, putative Class II)	LiP	382630	300	2.19e-101	0.683	0.55849	BEJ11632.1	Cutaneotrichosporon sp. HIS471	NCBI	10.1186/s12864-023-09718-2
Peroxidase (AA2 Class I, putative Class II)	LiP	382630	584	0	0.9183	0.83099	BEJ17620.1	Cutaneotrichosporon sp. HIS471	NCBI	10.1186/s12864-023-09718-2
Peroxidase (AA2 Class I, putative Class II)	LiP	382630	340	2.43e-114	0.8421	0.75709	BEJ04067.1	Cutaneotrichosporon cavernicola HIS641	NCBI	10.1186/s12864-023-09718-2
Phenol hydroxylase		374925	3277	0	0.9955	0.929	AAA34202.1	Trichosporon cutaneum	NCBI	10.1128/jb.174.22.7112-7120.1992
Phenol hydroxylase		391320	2354	0	0.3342	0.652	AAA34202.1	Trichosporon cutaneum	NCBI	10.1128/jb.174.22.7112-7120.1992
Phenol hydroxylase		370517	1072	3.21e-31	0.7492	0.4194	AAA34202.1	Trichosporon cutaneum	NCBI	10.1128/jb.174.22.7112-7120.1992
Phenol hydroxylase		344152	536	4.15e-26	0.3557	0.4378	AAA34202.1	Trichosporon cutaneum	NCBI	10.1128/jb.174.22.7112-7120.1992
Phenol hydroxylase		222522	162	1.21e-14	0.1206	0.4444	AAA34202.1	Trichosporon cutaneum	NCBI	10.1128/jb.174.22.7112-7120.1992
Phenol hydroxylase		263751	115	3.77e-08	0.0968	0.4074	AAA34202.1	Trichosporon cutaneum	NCBI	10.1128/jb.174.22.7112-7120.1992
Phenol hydroxylase		414521	103	1.71e-06	0.0905	0.3929	AAA34202.1	Trichosporon cutaneum	NCBI	10.1128/jb.174.22.7112-7120.1992
p-Hydroxybenzoate decarboxylase	PHBD	382250	737	2.63e-29	0.6787	0.4702	120062	Fusarium fujikuroi IMI 58289	JGI	10.1073/pnas.2017381118
p-Hydroxybenzoate decarboxylase	PHBD	419806	394	7.89e-17	0.4082	0.4392	120062	Fusarium fujikuroi IMI 58289	JGI	10.1073/pnas.2017381118
p-Hydroxybenzoate decarboxylase	PHBD	349359	377	1.31e-14	0.406	0.4286	120062	Fusarium fujikuroi IMI 58289	JGI	10.1073/pnas.2017381118
p-Hydroxybenzoate decarboxylase	PHBD	362125	247	1.88e-10	0.2232	0.49	120062	Fusarium fujikuroi IMI 58289	JGI	10.1073/pnas.2017381118
p-Hydroxybenzoate decarboxylase	PHBD	417242	192	9.74e-06	0.1901	0.4938	120062	Fusarium fujikuroi IMI 58289	JGI	10.1073/pnas.2017381118
p-Hydroxybenzoate decarboxylase	PHBD	417242	349	4.77e-20	0.4131	0.4261	90429	Fusarium fujikuroi IMI 58289	JGI	10.1073/pnas.2017381118
p-Hydroxybenzoate decarboxylase	PHBD	362125	225	3.1e-09	0.2946	0.3864	90429	Fusarium fujikuroi IMI 58289	JGI	10.1073/pnas.2017381118
p-Hydroxybenzoate decarboxylase	PHBD	382250	129	2.41e-10	0.1461	0.4154	90429	Fusarium fujikuroi IMI 58289	JGI	10.1073/pnas.2017381118
p-Hydroxybenzoate decarboxylase	PHBD	349359	120	4.27e-09	0.1067	0.587	90429	Fusarium fujikuroi IMI 58289	JGI	10.1073/pnas.2017381118
p-Hydroxybenzoate decarboxylase	PHBD	417242	420	2.65e-28	0.4695	0.45	32834	Trametes versicolor v1.0	JGI	10.1073/pnas.2017381118
p-Hydroxybenzoate decarboxylase	PHBD	362125	239	2.78e-11	0.3103	0.3669	32834	Trametes versicolor v1.0	JGI	10.1073/pnas.2017381118
p-Hydroxybenzoate decarboxylase	PHBD	382250	230	3.83e-11	0.2157	0.4792	32834	Trametes versicolor v1.0	JGI	10.1073/pnas.2017381118
p-Hydroxybenzoate decarboxylase	PHBD	349359	115	1.71e-08	0.1067	0.5	32834	Trametes versicolor v1.0	JGI	10.1073/pnas.2017381118
p-Hydroxybenzoate decarboxylase	PHBD	419806	98	4.03e-06	0.1253	0.3621	32834	Trametes versicolor v1.0	JGI	10.1073/pnas.2017381118
p-Hydroxybenzoate hydroxylase	MNX1	382250	511	3.93e-17	0.5663	0.4048	CPAR2_102790	Candida parapsilosis CDC317	Candida Genome Database	10.1099/mic.0.048215-0
p-Hydroxybenzoate hydroxylase	MNX1	419806	148	7.51e-13	0.1361	0.4762	CPAR2_102790	Candida parapsilosis CDC317	Candida Genome Database	10.1099/mic.0.048215-0
p-Hydroxybenzoate hydroxylase	MNX1	349359	142	5.06e-12	0.1485	0.4531	CPAR2_102790	Candida parapsilosis CDC317	Candida Genome Database	10.1099/mic.0.048215-0
p-Hydroxybenzoate hydroxylase	MNX1	362125	108	2.51e-07	0.1295	0.431	CPAR2_102790	Candida parapsilosis CDC317	Candida Genome Database	10.1099/mic.0.048215-0
p-Hydroxybenzoate hydroxylase	PHBH	374925	981	2.39e-40	0.5504	0.5191	58730	Trametes versicolor v1.0	JGI	10.1073/pnas.2017381118
p-Hydroxybenzoate hydroxylase	PHBH	370517	845	1.34e-30	0.6424	0.4193	58730	Trametes versicolor v1.0	JGI	10.1073/pnas.2017381118
p-Hydroxybenzoate hydroxylase	PHBH	391320	834	9.13e-41	0.128	0.6151	58730	Trametes versicolor v1.0	JGI	10.1073/pnas.2017381118
p-Hydroxybenzoate hydroxylase	PHBH	344152	547	3.63e-25	0.3237	0.4953	58730	Trametes versicolor v1.0	JGI	10.1073/pnas.2017381118
p-Hydroxybenzoate hydroxylase	PHBH	81479	210	1.77e-07	0.1824	0.3704	58730	Trametes versicolor v1.0	JGI	10.1073/pnas.2017381118
p-Hydroxybenzoate hydroxylase	PHBH	222522	165	2.81e-15	0.1206	0.4583	58730	Trametes versicolor v1.0	JGI	10.1073/pnas.2017381118
p-Hydroxybenzoate hydroxylase	PHBH	263751	129	2.9e-10	0.0986	0.4182	58730	Trametes versicolor v1.0	JGI	10.1073/pnas.2017381118
p-Hydroxybenzoate hydroxylase	PHBH	414521	110	1.28e-07	0.0905	0.4286	58730	Trametes versicolor v1.0	JGI	10.1073/pnas.2017381118
p-Hydroxybenzoate hydroxylase	PHBH	374925	853	8.5e-40	0.418	0.5755	82057	Fusarium fujikuroi IMI 58289	JGI	10.1073/pnas.2017381118
p-Hydroxybenzoate hydroxylase	PHBH	391320	794	3.24e-40	0.1224	0.6224	82057	Fusarium fujikuroi IMI 58289	JGI	10.1073/pnas.2017381118
p-Hydroxybenzoate hydroxylase	PHBH	370517	734	4.85e-29	0.5077	0.4451	82057	Fusarium fujikuroi IMI 58289	JGI	10.1073/pnas.2017381118
p-Hydroxybenzoate hydroxylase	PHBH	344152	645	2.72e-24	0.4214	0.4565	82057	Fusarium fujikuroi IMI 58289	JGI	10.1073/pnas.2017381118
p-Hydroxybenzoate hydroxylase	PHBH	414521	213	3.16e-08	0.1987	0.3902	82057	Fusarium fujikuroi IMI 58289	JGI	10.1073/pnas.2017381118
p-Hydroxybenzoate hydroxylase	PHBH	81479	211	3e-07	0.1824	0.3519	82057	Fusarium fujikuroi IMI 58289	JGI	10.1073/pnas.2017381118
p-Hydroxybenzoate hydroxylase	PHBH	222522	165	2.37e-15	0.1039	0.5161	82057	Fusarium fujikuroi IMI 58289	JGI	10.1073/pnas.2017381118
p-Hydroxybenzoate hydroxylase	PHBH	263751	143	2.81e-12	0.1308	0.3836	82057	Fusarium fujikuroi IMI 58289	JGI	10.1073/pnas.2017381118
p-Hydroxybenzoate hydroxylase		382250	737	2.63e-29	0.6787	0.4702	120062	Gelatoporia subvermispora FP-105752	JGI	10.1073/pnas.2017381118
p-Hydroxybenzoate hydroxylase		419806	394	7.89e-17	0.4082	0.4392	120062	Gelatoporia subvermispora FP-105752	JGI	10.1073/pnas.2017381118
p-Hydroxybenzoate hydroxylase		349359	377	1.31e-14	0.406	0.4286	120062	Gelatoporia subvermispora FP-105752	JGI	10.1073/pnas.2017381118
p-Hydroxybenzoate hydroxylase		362125	247	1.88e-10	0.2232	0.49	120062	Gelatoporia subvermispora FP-105752	JGI	10.1073/pnas.2017381118
p-Hydroxybenzoate hydroxylase		417242	192	9.74e-06	0.1901	0.4938	120062	Gelatoporia subvermispora FP-105752	JGI	10.1073/pnas.2017381118
p-Hydroxybenzoate hydroxylase		417242	349	4.77e-20	0.4131	0.4261	90429	Gelatoporia subvermispora FP-105752	JGI	10.1073/pnas.2017381118
p-Hydroxybenzoate hydroxylase		362125	225	3.1e-09	0.2946	0.3864	90429	Gelatoporia subvermispora FP-105752	JGI	10.1073/pnas.2017381118
p-Hydroxybenzoate hydroxylase		382250	129	2.41e-10	0.1461	0.4154	90429	Gelatoporia subvermispora FP-105752	JGI	10.1073/pnas.2017381118
p-Hydroxybenzoate hydroxylase		349359	120	4.27e-09	0.1067	0.587	90429	Gelatoporia subvermispora FP-105752	JGI	10.1073/pnas.2017381118
Protocatechuate 3,4-dioxygenase		85172	483	5.5e-39	0.8277	0.3796	1405	Aspergillus niger NRRL3	JGI	10.1128/AEM .01786-19
Protocatechuate 3,4-dioxygenase		374756	343	3.44e-19	0.4735	0.4161	1405	Aspergillus niger NRRL3	JGI	10.1128/AEM .01786-19
Putative 3-oxoadipate enol-lactonase		414883	323	1.63e-17	0.273	0.3886	XP_050467699.1	Aspergillus nidulans FGSC A4	Genbank	10.1016/j.fgb.2014.11.002
Putative quinone oxidoreductase		369953	596	2.16e-28	0.7485	0.4585	24676	Postia placenta MAD 698-R v1.0	JGI	10.1073/pnas.080957510
Putative quinone oxidoreductase		396877	203	1.17e-20	0.403	0.3556	24676	Postia placenta MAD 698-R v1.0	JGI	10.1073/pnas.080957510
Putative quinone oxidoreductase		244437	148	4.58e-13	0.2958	0.3238	24676	Postia placenta MAD 698-R v1.0	JGI	10.1073/pnas.080957510
Putative quinone oxidoreductase		385504	143	2.25e-12	0.4565	0.2925	24676	Postia placenta MAD 698-R v1.0	JGI	10.1073/pnas.080957510
Putative quinone oxidoreductase		296620	96	6.94e-06	0.1488	0.3519	24676	Postia placenta MAD 698-R v1.0	JGI	10.1073/pnas.080957510
Putative quinone oxidoreductase		156533	242	6.1e-13	0.2306	0.5349	88841	Postia placenta MAD 698-R v1.0	JGI	10.1073/pnas.080957510
Putative quinone oxidoreductase		244437	135	2.81e-11	0.2507	0.3371	88841	Postia placenta MAD 698-R v1.0	JGI	10.1073/pnas.080957510
Putative quinone oxidoreductase		383427	122	1.78e-09	0.2199	0.3973	88841	Postia placenta MAD 698-R v1.0	JGI	10.1073/pnas.080957510
Putative quinone oxidoreductase		374037	110	8.22e-08	0.1296	0.5217	88841	Postia placenta MAD 698-R v1.0	JGI	10.1073/pnas.080957510
Putative quinone oxidoreductase		385504	110	8.22e-08	0.2764	0.3146	88841	Postia placenta MAD 698-R v1.0	JGI	10.1073/pnas.080957510
Putative quinone oxidoreductase		396877	108	1.56e-07	0.2896	0.268	88841	Postia placenta MAD 698-R v1.0	JGI	10.1073/pnas.080957510
Putative quinone oxidoreductase		340336	107	2.14e-07	0.1516	0.4423	88841	Postia placenta MAD 698-R v1.0	JGI	10.1073/pnas.080957510
Putative quinone oxidoreductase		371691	101	1.45e-06	0.1618	0.4	88841	Postia placenta MAD 698-R v1.0	JGI	10.1073/pnas.080957510
Putative quinone oxidoreductase		397827	97	5.21e-06	0.1701	0.3509	88841	Postia placenta MAD 698-R v1.0	JGI	10.1073/pnas.080957510
Putative quinone oxidoreductase		213901	593	2.64e-29	0.6686	0.4957	93688	Postia placenta MAD 698-R v1.0	JGI	10.1073/pnas.080957510
Putative quinone oxidoreductase		342726	219	7.55e-09	0.2411	0.5062	93688	Postia placenta MAD 698-R v1.0	JGI	10.1073/pnas.080957510
Putative quinone oxidoreductase		244437	124	8.01e-10	0.2197	0.359	93688	Postia placenta MAD 698-R v1.0	JGI	10.1073/pnas.080957510
Putative quinone oxidoreductase		374037	382	1.02e-13	0.5155	0.4208	93958	Postia placenta MAD 698-R v1.0	JGI	10.1073/pnas.080957510
Putative quinone oxidoreductase		371691	113	2.15e-08	0.1647	0.4821	93958	Postia placenta MAD 698-R v1.0	JGI	10.1073/pnas.080957510
Putative quinone oxidoreductase		156533	100	1.43e-06	0.1555	0.4138	93958	Postia placenta MAD 698-R v1.0	JGI	10.1073/pnas.080957510
Putative quinone oxidoreductase		383427	739	2.44e-21	0.8434	0.5179	97531	Postia placenta MAD 698-R v1.0	JGI	10.1073/pnas.080957510
Putative quinone oxidoreductase		244437	250	9.28e-12	0.2535	0.5556	97531	Postia placenta MAD 698-R v1.0	JGI	10.1073/pnas.080957510
Putative quinone oxidoreductase		396877	127	3.12e-10	0.1463	0.551	97531	Postia placenta MAD 698-R v1.0	JGI	10.1073/pnas.080957510
Putative quinone oxidoreductase		371691	105	3.54e-07	0.2324	0.3544	97531	Postia placenta MAD 698-R v1.0	JGI	10.1073/pnas.080957510
Succinyl-CoA:3-oxoadipate CoA-transferase		399397	1400	6.43e-133	0.8706	0.5833	CBF81437.1	Aspergillus nidulans FGSC A4	Genbank	10.1016/j.fgb.2014.11.002
Succinyl-CoA:3-oxoadipate CoA-transferase		303768	1396	7.82e-47	0.8569	0.572	CBF81437.1	Aspergillus nidulans FGSC A4	Genbank	10.1016/j.fgb.2014.11.002
Succinyl-CoA:3-oxoadipate CoA-transferase		367394	1284	1.23e-88	0.8781	0.5374	CBF81437.1	Aspergillus nidulans FGSC A4	Genbank	10.1016/j.fgb.2014.11.002
Succinyl-CoA:3-oxoadipate CoA-transferase		303768	1343	5.63e-45	0.8336	0.573	XP_661611.2	Aspergillus nidulans FGSC A4	Uniprot	10.1016/j.fgb.2014.11.002
Succinyl-CoA:3-oxoadipate CoA-transferase		399397	1342	2.38e-69	0.8784	0.567	XP_661611.2	Aspergillus nidulans FGSC A4	Uniprot	10.1016/j.fgb.2014.11.002
Succinyl-CoA:3-oxoadipate CoA-transferase		367394	1122	6.2e-46	0.8008	0.5193	XP_661611.2	Aspergillus nidulans FGSC A4	Uniprot	10.1016/j.fgb.2014.11.002
Thioesterase	theB	368093	78	0.00167	0.1103	0.5161	1539	Aspergillus niger NRRL3	JGI	10.1007/s00253-021-11311-0
Thioesterase	theC	334113	314	1.29e-11	0.35	0.5268	2735	Aspergillus niger NRRL3	JGI	10.1007/s00253-021-11311-0
Thioesterase	theC	338705	237	3.9e-13	0.2111	0.55	2735	Aspergillus niger NRRL3	JGI	10.1007/s00253-021-11311-0
Thioesterase	theD	396275	161	3.61e-05	0.4667	0.4416	6009	Aspergillus niger NRRL3	JGI	10.1007/s00253-021-11311-0
Thioesterase	theD	419904	88	3.61e-05	0.2733	0.4043	6009	Aspergillus niger NRRL3	JGI	10.1007/s00253-021-11311-0
Thioesterase	theD	375061	84	0.000131	0.1919	0.5455	6009	Aspergillus niger NRRL3	JGI	10.1007/s00253-021-11311-0
Thioesterase	theD	399643	81	0.000342	0.2326	0.45	6009	Aspergillus niger NRRL3	JGI	10.1007/s00253-021-11311-0
Thioesterase	theD	371492	72	0.00615	0.2841	0.3	6009	Aspergillus niger NRRL3	JGI	10.1007/s00253-021-11311-0
Thioesterase	theD	399287	72	0.00615	0.1495	0.4688	6009	Aspergillus niger NRRL3	JGI	10.1007/s00253-021-11311-0
Thioesterase	theA	371904	304	2.47e-16	0.8293	0.4632	621	Aspergillus niger NRRL3	JGI	10.1007/s00253-021-11311-0
Thioesterase	theA	372469	169	4.85e-06	0.625	0.34	621	Aspergillus niger NRRL3	JGI	10.1007/s00253-021-11311-0
Thioesterase	theA	416464	153	0.000591	0.6111	0.3	621	Aspergillus niger NRRL3	JGI	10.1007/s00253-021-11311-0
Vanillin dehydrogenase	vdh	372511	534	2.2e-23	0.7678	0.313	K9UV87	Amycolatopsis sp. Strain ATCC 39116	Uniprot	10.1128/AEM.02358-12
Vanillin dehydrogenase	vdh	374424	531	1.1e-26	0.6818	0.3515	K9UV87	Amycolatopsis sp. Strain ATCC 39116	Uniprot	10.1128/AEM.02358-12
Vanillin dehydrogenase	vdh	335315	530	2.01e-37	0.7456	0.3255	K9UV87	Amycolatopsis sp. Strain ATCC 39116	Uniprot	10.1128/AEM.02358-12
Vanillin dehydrogenase	vdh	367813	506	2.35e-20	0.5518	0.3631	K9UV87	Amycolatopsis sp. Strain ATCC 39116	Uniprot	10.1128/AEM.02358-12
Vanillin dehydrogenase	vdh	398661	476	4.35e-16	0.6436	0.3164	K9UV87	Amycolatopsis sp. Strain ATCC 39116	Uniprot	10.1128/AEM.02358-12
Vanillin dehydrogenase	vdh	365260	471	7.48e-30	0.6029	0.3621	K9UV87	Amycolatopsis sp. Strain ATCC 39116	Uniprot	10.1128/AEM.02358-12
Vanillin dehydrogenase	vdh	416950	434	1.61e-23	0.4493	0.3894	K9UV87	Amycolatopsis sp. Strain ATCC 39116	Uniprot	10.1128/AEM.02358-12
Vanillin dehydrogenase	vdh	390461	418	9.09e-21	0.4403	0.3563	K9UV87	Amycolatopsis sp. Strain ATCC 39116	Uniprot	10.1128/AEM.02358-12
Vanillin dehydrogenase	vdh	368244	417	3.82e-22	0.5914	0.3818	K9UV87	Amycolatopsis sp. Strain ATCC 39116	Uniprot	10.1128/AEM.02358-12
Vanillin dehydrogenase	vdh	370144	416	1.28e-09	0.437	0.4231	K9UV87	Amycolatopsis sp. Strain ATCC 39116	Uniprot	10.1128/AEM.02358-12
4-oxo-monomethyl adipate esterase		383933	142	5.07e-12	0.0657	0.6316	10110	Aspergillus niger NRRL3	JGI	10.1186/s12934-021-01643-x
4-oxo-monomethyl adipate esterase		387355	135	4.7e-11	0.0654	0.6316	10110	Aspergillus niger NRRL3	JGI	10.1186/s12934-021-01643-x
4-oxo-monomethyl adipate esterase		395051	132	1.22e-10	0.0656	0.5789	10110	Aspergillus niger NRRL3	JGI	10.1186/s12934-021-01643-x
4-oxo-monomethyl adipate esterase		399647	127	6e-10	0.0829	0.4583	10110	Aspergillus niger NRRL3	JGI	10.1186/s12934-021-01643-x
4-oxo-monomethyl adipate esterase		328841	121	4.05e-09	0.0986	0.3818	10110	Aspergillus niger NRRL3	JGI	10.1186/s12934-021-01643-x
4-oxo-monomethyl adipate esterase		115279	113	5.17e-08	0.1333	0.3784	10110	Aspergillus niger NRRL3	JGI	10.1186/s12934-021-01643-x
4-oxo-monomethyl adipate esterase		369096	107	3.49e-07	0.076	0.4565	10110	Aspergillus niger NRRL3	JGI	10.1186/s12934-021-01643-x
4-oxo-monomethyl adipate esterase		374904	104	9.08e-07	0.0631	0.5135	10110	Aspergillus niger NRRL3	JGI	10.1186/s12934-021-01643-x
4-oxo-monomethyl adipate esterase		383642	103	1.25e-06	0.1101	0.4	10110	Aspergillus niger NRRL3	JGI	10.1186/s12934-021-01643-x
Hydroxybenzoate transporter	HBT2	393414	174	3.7e-17	0.2164	0.2745	204840	Candida parapsilosis CLIB214	Candida Genome Database	10.1038/s41598-017-09408-6
Hydroxybenzoate transporter	HBT2	394919	134	1.84e-11	0.2416	0.2336	204840	Candida parapsilosis CLIB214	Candida Genome Database	10.1038/s41598-017-09408-6
Hydroxybenzoate transporter	HBT2	370902	128	1.32e-10	0.2297	0.2462	204840	Candida parapsilosis CLIB214	Candida Genome Database	10.1038/s41598-017-09408-6
Hydroxybenzoate transporter	HBT2	340764	127	1.83e-10	0.2216	0.2441	204840	Candida parapsilosis CLIB214	Candida Genome Database	10.1038/s41598-017-09408-6
Hydroxybenzoate transporter	HBT2	360664	123	6.8e-10	0.1661	0.2396	204840	Candida parapsilosis CLIB214	Candida Genome Database	10.1038/s41598-017-09408-6
Hydroxybenzoate transporter	HBT2	416920	119	2.53e-09	0.1921	0.25	204840	Candida parapsilosis CLIB214	Candida Genome Database	10.1038/s41598-017-09408-6
Hydroxybenzoate transporter	HBT2	336185	109	6.71e-08	0.1987	0.2205	204840	Candida parapsilosis CLIB214	Candida Genome Database	10.1038/s41598-017-09408-6
Hydroxybenzoate transporter	HBT2	233464	106	1.8e-07	0.248	0.2205	204840	Candida parapsilosis CLIB214	Candida Genome Database	10.1038/s41598-017-09408-6
Hydroxybenzoate transporter	HBT2	374433	102	6.67e-07	0.2386	0.2302	204840	Candida parapsilosis CLIB214	Candida Genome Database	10.1038/s41598-017-09408-6
Hydroxybenzoate transporter	HBT2	374231	100	1.29e-06	0.2195	0.2453	204840	Candida parapsilosis CLIB214	Candida Genome Database	10.1038/s41598-017-09408-6
Hydroxybenzoate transporter	HBT1	345373	347	5.53e-09	0.5009	0.3045	704330	Candida parapsilosis CLIB214	Candida Genome Database	10.1038/s41598-017-09408-6
Hydroxybenzoate transporter	HBT1	393414	220	1.32e-23	0.2249	0.2956	704330	Candida parapsilosis CLIB214	Candida Genome Database	10.1038/s41598-017-09408-6
Hydroxybenzoate transporter	HBT1	370902	181	4.54e-18	0.3074	0.2701	704330	Candida parapsilosis CLIB214	Candida Genome Database	10.1038/s41598-017-09408-6
Hydroxybenzoate transporter	HBT1	335655	167	4.41e-16	0.3231	0.2261	704330	Candida parapsilosis CLIB214	Candida Genome Database	10.1038/s41598-017-09408-6
Hydroxybenzoate transporter	HBT1	360664	165	8.49e-16	0.2889	0.2575	704330	Candida parapsilosis CLIB214	Candida Genome Database	10.1038/s41598-017-09408-6
Hydroxybenzoate transporter	HBT1	374231	145	5.86e-13	0.3768	0.2308	704330	Candida parapsilosis CLIB214	Candida Genome Database	10.1038/s41598-017-09408-6
Hydroxybenzoate transporter	HBT1	189400	135	1.54e-11	0.3198	0.2606	704330	Candida parapsilosis CLIB214	Candida Genome Database	10.1038/s41598-017-09408-6
Hydroxybenzoate transporter	HBT1	416920	126	2.92e-10	0.197	0.2605	704330	Candida parapsilosis CLIB214	Candida Genome Database	10.1038/s41598-017-09408-6
Hydroxybenzoate transporter	HBT1	370558	122	1.08e-09	0.2405	0.2632	704330	Candida parapsilosis CLIB214	Candida Genome Database	10.1038/s41598-017-09408-6
Hydroxybenzoate transporter	HBT1	347142	116	7.67e-09	0.2729	0.2414	704330	Candida parapsilosis CLIB214	Candida Genome Database	10.1038/s41598-017-09408-6
