# Supplementary material for: Exploring the Ligninolytic Capabilities of the Oleaginous Yeast Cutaneotrichosporon oleaginosum
Source: Research Square preprint supplement (doi:10.21203/rs.3.rs-6335743/v1), 2025-05-07
Supplement: Supplementary file 2 [file 23c88eca8b87a9de0783b7f0.xlsx]

## Sheet: Legend
Supplemental Dataset S2: MaxQuant and differential expression data used for secretomics analyses (Main Text Figures 3–4 and SI Appendix Table 4, Figures S2–4)
Notes: Some proteins are duplicated in the datasets due to the fact that they belong to different CUPP (and by extension CAZy) families. These duplicates were only introduced after exporting and merging the final results from differential expression analyses.
Spreadsheet Contents:
Lig_NoCarb_MaxQuantAll	= Lignin and No Carbon MaxQuant Data Summary and Annotations
Lig_NoCarb_DEqMS	= Lignin vs. No Carbon Differential Expression Analysis Results using DEqMS (MaxQuant LFQ Intensities)
Lig_Glucose_MaxQuantAll	= Lignin and Glucose MaxQuant Data Summary and Annotations
Lig_Glucose_DEqMS	= Lignin vs. Glucose Differential Expression Analysis Results using DEqMS (MaxQuant LFQ Intensities)
Lig_Glucose_DEP	= Lignin vs. Glucose Differential Expression Analysis Results using DEP (Raw Intensities, No Imputation)
Column Designations:
Protein.IDs	= JGI protein accession ID
Identification.type.XXXX	= Peptide identification either by MS/MS or matching (i.e., MaxQuant Match Between Runs; MBR)
Intensity.XXXX	= Raw intensity values (log2-transformed in DEP sheet)
LFQ.intensity.XXXX	= Label-free Quantification (LFQ) intensity values (log2-transformed in DEqMS sheets)
logFC	= log foldchanges according to DEqMS or DEP differential expression analyses
sca.P.Value	= DEqMS unadjusted p-value from differential expression analysis
sca.adj.pval	= DEqMS adjusted p-value from differential expression analysis
P.Value	= DEP unadjusted p-value from differential expression analysis
adj.pval	= DEP adjusted p-value from differential expression analysis
seed_ortholog	= Protein that matches query sequence and is used to identify Orthologous Groups (OG's), relationships, and annotations (specified as "txID.GenbankAccession" on NCBI")
evalue	= E-value for the seed_ortholog
score	= Score for the seed_ortholog
eggNOG_OGs	= A comma-separated, clade depth-sorted (broadest to narrowest), list of OG's identified for this query. Note that each OG is represented in the following format: OG@tax_id|tax_name
max_annot_lvl	= tax_id|tax_name of the level of widest OG used to retrieve orthologs for annotations
COG_category	= Clusters of Orthologous Genes (COG) category of the narrowest OG with a valid one
Description	= Description of the narrowest OG with a valid one
Preferred_name	= Common gene nomenclature
GOs	= List of Gene Ontology (GO) terms from transferred annotations
KEGG_ko	= Kyoto Encyclopedia of Genes and Genomes (KEGG) orthology terms
KEGG_Pathway	= KEGG pathway accessions
PFAMs	= Protein Family (PFAM) classifications
SP.Prediction	= SignalP 6.0 signal peptide prediction result
OTHER	= SignalP 6.0 "other" prediction score
SP.Sec.SPI.	= SignalP 6.0 "standard" secretory signal peptide prediction score
CS.Position	= Consensus Sequence Position
cazy_class	= Carbohydrate-Active Enzyme (CAZy) class
cazy_family	= CAZy family
cazy_subfamily	= CAZy subfamily
cupp_group	= Conserved Unique Peptied Patterns (CUPP) CAZy group
cupp_branch	= CUPP branch

## Sheet: Lig_NoCarb_MaxQuantAll
Protein.IDs	Identification.type.Lignin_S1	Identification.type.Lignin_S2	Identification.type.Lignin_S3	Identification.type.NoCarbon_S1	Identification.type.NoCarbon_S2	Identification.type.NoCarbon_S3	Intensity.Lignin_S1	Intensity.Lignin_S2	Intensity.Lignin_S3	Intensity.NoCarbon_S1	Intensity.NoCarbon_S2	Intensity.NoCarbon_S3	LFQ.intensity.Lignin_S1	LFQ.intensity.Lignin_S2	LFQ.intensity.Lignin_S3	LFQ.intensity.NoCarbon_S1	LFQ.intensity.NoCarbon_S2	LFQ.intensity.NoCarbon_S3	seed_ortholog	evalue	score	eggNOG_OGs	max_annot_lvl	COG_category	Description	Preferred_name	GOs	KEGG_ko	KEGG_Pathway	PFAMs	SP.Prediction	OTHER	SP.Sec.SPI.	CS.Position	cazy_class	cazy_family	cazy_subfamily	cupp_group	cupp_branch
514	By MS/MS	By MS/MS	By MS/MS	By MS/MS	By MS/MS	By MS/MS	38910000	19307000	19517000	32049000	78592000	87634000	16292000	5185000	7107500	9346100	8742200	11345000	NA	NA	NA	NA	NA	NA	NA	NA	NA	NA	NA	NA	SP	0.000366	0.999619	CS pos: 19-20. Pr: 0.9720	NA	NA	NA	NA	NA
643	By MS/MS	By matching	By MS/MS	By matching	By MS/MS	By matching	7605700	1329200	3680400	1456700	16190000	3169200	7006600	0	3363700	0	2993000	0	NA	NA	NA	NA	NA	NA	NA	NA	NA	NA	NA	NA	SP	0.000226	0.999751	CS pos: 15-16. Pr: 0.9760	NA	NA	NA	NA	NA
2126	By MS/MS	By MS/MS	By MS/MS	By MS/MS	By MS/MS	By MS/MS	24026000	8414300	15731000	17557000	61507000	63891000	9343100	4303300	6610100	4933500	7157600	8865100	5207.AAW46177	8.4e-228	641	COG2939@1|root,KOG1282@2759|Eukaryota,38FWP@33154|Opisthokonta,3NWF4@4751|Fungi,3V09D@5204|Basidiomycota,3VDA2@5234|Tremellales	4751|Fungi	O	Serine carboxypeptidase	NA	NA	ko:K13289	ko04142,ko04614,map04142,map04614	Peptidase_S10	OTHER	1	0	NA	NA	NA	NA	NA	NA
2976	By MS/MS	By MS/MS	By matching	NA	NA	NA	2624000	0	2878500	0	0	0	0	0	0	0	0	0	82508.K1VHQ1	8.77e-255	716	29MVY@1|root,2RV66@2759|Eukaryota,39UMF@33154|Opisthokonta,3P1GP@4751|Fungi,3UYSS@5204|Basidiomycota,3VCVH@5234|Tremellales	4751|Fungi	S	Protein of unknown function (DUF563)	NA	NA	NA	NA	DUF563	OTHER	0.999847	0.00016	NA	NA	NA	NA	NA	NA
3131	NA	NA	NA	NA	By MS/MS	NA	0	0	0	0	7843300	0	0	0	0	0	0	0	82508.K1WTI0	4.59e-95	320	KOG0154@1|root,KOG0154@2759|Eukaryota,39X4K@33154|Opisthokonta,3NZPN@4751|Fungi,3V1G6@5204|Basidiomycota,3VF6B@5234|Tremellales	4751|Fungi	S	R3H domain	SQS1	GO:0000375,GO:0000377,GO:0000398,GO:0005575,GO:0005622,GO:0005623,GO:0005634,GO:0005730,GO:0005737,GO:0006139,GO:0006364,GO:0006396,GO:0006397,GO:0006725,GO:0006807,GO:0008150,GO:0008152,GO:0008380,GO:0009987,GO:0010467,GO:0016070,GO:0016071,GO:0016072,GO:0022613,GO:0030490,GO:0030684,GO:0030686,GO:0030687,GO:0030688,GO:0031974,GO:0031981,GO:0032781,GO:0032991,GO:0034470,GO:0034641,GO:0034660,GO:…	NA	NA	G-patch,R3H	OTHER	1	1e-05	NA	NA	NA	NA	NA	NA
5170	By matching	By MS/MS	By matching	By MS/MS	By MS/MS	By MS/MS	12712000	968340	11539000	604090000	1785300000	3794500000	0	0	5244600	33061000	38940000	247840000	82508.K1VRY2	0	1127	COG1501@1|root,KOG1065@2759|Eukaryota,38C0A@33154|Opisthokonta,3NVMX@4751|Fungi,3UZQH@5204|Basidiomycota,3VD40@5234|Tremellales	4751|Fungi	G	N-terminal barrel of NtMGAM and CtMGAM, maltase-glucoamylase	NA	NA	ko:K01187	ko00052,ko00500,ko01100,map00052,map00500,map01100	Gal_mutarotas_2,Glyco_hydro_31,NtCtMGAM_N	SP	0.000284	0.999707	CS pos: 18-19. Pr: 0.9619	GH	GH31	NA	GH31:18.1	GH31*2
5996	NA	NA	NA	By MS/MS	By matching	NA	0	0	0	17093000	2697800	0	0	0	0	0	0	0	NA	NA	NA	NA	NA	NA	NA	NA	NA	NA	NA	NA	OTHER	0.999584	0.000476	NA	NA	NA	NA	NA	NA
7276	NA	By MS/MS	NA	By MS/MS	By MS/MS	By MS/MS	0	0	0	3442400	9066100	0	0	0	0	0	0	0	82508.K1VXA8	1.87e-190	540	COG0639@1|root,KOG0376@2759|Eukaryota,38E0Z@33154|Opisthokonta,3NU3F@4751|Fungi,3UYCR@5204|Basidiomycota,3VG9F@5234|Tremellales	4751|Fungi	T	serine threonine-protein phosphatase	PPT1	GO:0003674,GO:0003824,GO:0004721,GO:0004722,GO:0005575,GO:0005622,GO:0005623,GO:0005634,GO:0005737,GO:0006464,GO:0006470,GO:0006793,GO:0006796,GO:0006807,GO:0007154,GO:0007165,GO:0008150,GO:0008152,GO:0009987,GO:0016311,GO:0016787,GO:0016788,GO:0016791,GO:0019538,GO:0023052,GO:0036211,GO:0042578,GO:0043170,GO:0043226,GO:0043227,GO:0043229,GO:0043231,GO:0043412,GO:0044237,GO:0044238,GO:0044260,GO:…	ko:K04460	ko04010,map04010	Metallophos,PPP5,TPR_1,TPR_11,TPR_8	OTHER	0.998501	0.00153	NA	NA	NA	NA	NA	NA
11281	NA	NA	NA	By matching	By MS/MS	By MS/MS	0	0	0	12801000	21979000	0	0	0	0	0	0	0	5217.XP_007006950.1	1.85e-17	89.4	KOG4325@1|root,KOG4325@2759|Eukaryota,3A96F@33154|Opisthokonta,3P7Z3@4751|Fungi,3V7WA@5204|Basidiomycota,3VHCN@5234|Tremellales	4751|Fungi	S	Mago binding	NA	NA	ko:K14294	ko03013,ko03015,map03013,map03015	Mago-bind	OTHER	1	0	NA	NA	NA	NA	NA	NA
16977	NA	By MS/MS	NA	NA	NA	NA	0	3439000	0	0	0	0	0	0	0	0	0	0	5286.M7XG56	1.47e-99	306	COG0665@1|root,KOG3923@2759|Eukaryota,39SQP@33154|Opisthokonta,3NXYK@4751|Fungi,3V0SY@5204|Basidiomycota,2YFQW@29000|Pucciniomycotina	4751|Fungi	E	FAD dependent oxidoreductase	NA	NA	ko:K00273	ko00260,ko00311,ko00330,ko00472,ko01100,ko01130,ko04146,map00260,map00311,map00330,map00472,map01100,map01130,map04146	DAO	OTHER	0.951146	0.04885	NA	NA	NA	NA	NA	NA
17690	By matching	By matching	NA	By MS/MS	By MS/MS	By MS/MS	552680	1055900	0	27737000	100960000	24080000	0	0	0	5426800	9557400	5515300	82508.K1VC19	8.91e-126	380	KOG1721@1|root,KOG1721@2759|Eukaryota,3A8DQ@33154|Opisthokonta,3P6MW@4751|Fungi,3V26I@5204|Basidiomycota,3VFV9@5234|Tremellales	4751|Fungi	S	Zinc finger, C2H2 type	NRG1	GO:0000003,GO:0000122,GO:0000429,GO:0000430,GO:0000433,GO:0000976,GO:0000977,GO:0000978,GO:0000981,GO:0000982,GO:0000987,GO:0000988,GO:0000989,GO:0001012,GO:0001067,GO:0001076,GO:0001078,GO:0001085,GO:0001103,GO:0001191,GO:0001227,GO:0001410,GO:0002831,GO:0002832,GO:0003674,GO:0003676,GO:0003677,GO:0003690,GO:0003700,GO:0005488,GO:0005515,GO:0005575,GO:0005622,GO:0005623,GO:0005634,GO:0006355,GO:…	ko:K09467	NA	zf-C2H2	OTHER	1	0	NA	NA	NA	NA	NA	NA
18584	NA	By matching	NA	By matching	By MS/MS	By MS/MS	0	4305600	0	2011500	16267000	5595200	0	0	0	0	0	0	82508.K1VQK6	2.46e-117	385	2BYRP@1|root,2SAS5@2759|Eukaryota,39VR6@33154|Opisthokonta,3NYUX@4751|Fungi,3V33G@5204|Basidiomycota,3VGIJ@5234|Tremellales	4751|Fungi	S	Fungal protein of unknown function (DUF1752)	NA	GO:0000122,GO:0005575,GO:0005622,GO:0005623,GO:0005737,GO:0006355,GO:0006357,GO:0006808,GO:0007154,GO:0007165,GO:0008150,GO:0009889,GO:0009890,GO:0009892,GO:0009987,GO:0010468,GO:0010556,GO:0010558,GO:0010605,GO:0010629,GO:0019219,GO:0019222,GO:0023052,GO:0031323,GO:0031324,GO:0031326,GO:0031327,GO:0031930,GO:0044424,GO:0044464,GO:0045892,GO:0045934,GO:0048519,GO:0048523,GO:0050789,GO:0050794,GO:…	NA	NA	DUF1752,DUF3295	OTHER	1	2e-06	NA	NA	NA	NA	NA	NA
19515	By MS/MS	By MS/MS	By MS/MS	By MS/MS	By MS/MS	By MS/MS	2536300000	1607000000	1701200000	1390200000	7769100000	10557000000	746390000	331440000	426220000	263750000	703450000	1209500000	NA	NA	NA	NA	NA	NA	NA	NA	NA	NA	NA	NA	OTHER	0.999913	0.000112	NA	NA	NA	NA	NA	NA
19581	By MS/MS	By MS/MS	By MS/MS	By MS/MS	By MS/MS	By MS/MS	27082000	24570000	22621000	23083000	53290000	37091000	0	14464000	18768000	0	9974500	9507100	NA	NA	NA	NA	NA	NA	NA	NA	NA	NA	NA	NA	OTHER	1	8e-06	NA	NA	NA	NA	NA	NA
21015	By MS/MS	By MS/MS	By MS/MS	NA	NA	By MS/MS	5323800	11313000	8990600	0	0	15797000	0	0	0	0	0	0	82508.K1VK01	1.2e-192	548	COG1482@1|root,KOG2757@2759|Eukaryota,38C6R@33154|Opisthokonta,3NVQ2@4751|Fungi,3UZ5D@5204|Basidiomycota,3VD9N@5234|Tremellales	4751|Fungi	G	Mannose-6-phosphate isomerase	PMI1	GO:0000032,GO:0003674,GO:0003824,GO:0004476,GO:0005575,GO:0005622,GO:0005623,GO:0005634,GO:0005737,GO:0005975,GO:0005996,GO:0006013,GO:0006056,GO:0006057,GO:0006139,GO:0006464,GO:0006486,GO:0006725,GO:0006807,GO:0008150,GO:0008152,GO:0009058,GO:0009059,GO:0009100,GO:0009101,GO:0009225,GO:0009226,GO:0009298,GO:0009987,GO:0016043,GO:0016853,GO:0016860,GO:0016861,GO:0018130,GO:0019318,GO:0019438,GO:…	ko:K01809	ko00051,ko00520,ko01100,ko01110,ko01130,map00051,map00520,map01100,map01110,map01130	PMI_typeI	OTHER	1	0	NA	NA	NA	NA	NA	NA
21173	By MS/MS	By MS/MS	By MS/MS	By MS/MS	By MS/MS	By MS/MS	13979000	6736100	9982300	3141800	19996000	11351000	0	3833100	5744300	0	3101800	0	NA	NA	NA	NA	NA	NA	NA	NA	NA	NA	NA	NA	SP	0.000264	0.999703	CS pos: 14-15. Pr: 0.9728	NA	NA	NA	NA	NA
26860	By MS/MS	By MS/MS	By MS/MS	By MS/MS	By MS/MS	By MS/MS	36385000	38331000	41530000	66053000	232590000	345310000	20481000	9301600	17720000	7312800	15193000	34140000	5207.AAW44259	1.21e-261	738	2CMA6@1|root,2QPS4@2759|Eukaryota,38F5I@33154|Opisthokonta,3NWVA@4751|Fungi,3UXZX@5204|Basidiomycota,3VGCP@5234|Tremellales	4751|Fungi	S	Domain of unknown function (DUF1929)	NA	NA	ko:K20929	NA	DUF1929,Glyoxal_oxid_N	SP	0.311847	0.688136	CS pos: 19-20. Pr: 0.6443	AA	AA5	AA5_1	AA5:2.1	AA5*4
29190	By MS/MS	By MS/MS	By matching	By MS/MS	By MS/MS	By MS/MS	8974600	42827000	6656200	45574000	99001000	74146000	6163300	8711000	4760300	8711700	6398100	5546400	NA	NA	NA	NA	NA	NA	NA	NA	NA	NA	NA	NA	OTHER	1	0	NA	NA	NA	NA	NA	NA
30290	NA	By matching	NA	By matching	By MS/MS	By MS/MS	0	7598800	0	6973200	16232000	6807100	0	0	0	0	0	0	82508.K1WG40	1.01e-121	348	COG1100@1|root,KOG0071@2759|Eukaryota,38I0U@33154|Opisthokonta,3NYP1@4751|Fungi,3UZ4F@5204|Basidiomycota,3VDJE@5234|Tremellales	4751|Fungi	U	Belongs to the small GTPase superfamily. Arf family	NA	GO:0000139,GO:0000166,GO:0000278,GO:0000281,GO:0000282,GO:0000910,GO:0000935,GO:0001558,GO:0001882,GO:0001883,GO:0003674,GO:0003676,GO:0003723,GO:0003729,GO:0003824,GO:0003924,GO:0005488,GO:0005525,GO:0005575,GO:0005622,GO:0005623,GO:0005737,GO:0005794,GO:0005829,GO:0005933,GO:0005934,GO:0005935,GO:0005938,GO:0006810,GO:0006886,GO:0006888,GO:0006897,GO:0006996,GO:0007010,GO:0007015,GO:0007049,GO:…	ko:K07941	ko04014,ko04072,ko04144,ko04666,map04014,map04072,map04144,map04666	Arf	OTHER	1	0	NA	NA	NA	NA	NA	NA
30929	NA	By MS/MS	By MS/MS	By MS/MS	By MS/MS	By MS/MS	0	8440700	3021200	2043400	3219800	1340700	0	0	0	0	0	0	82508.K1VA22	0	1753	COG2114@1|root,KOG0618@2759|Eukaryota,38GSJ@33154|Opisthokonta,3NUNK@4751|Fungi,3UYAE@5204|Basidiomycota,3VD42@5234|Tremellales	4751|Fungi	T	Adenylate cyclase	CYR1	GO:0000429,GO:0000430,GO:0000433,GO:0001678,GO:0003674,GO:0003824,GO:0004016,GO:0005488,GO:0005575,GO:0005622,GO:0005623,GO:0005737,GO:0005739,GO:0005783,GO:0005789,GO:0005829,GO:0005886,GO:0006139,GO:0006163,GO:0006164,GO:0006171,GO:0006355,GO:0006357,GO:0006725,GO:0006753,GO:0006793,GO:0006796,GO:0006807,GO:0007154,GO:0007165,GO:0007186,GO:0007187,GO:0007188,GO:0007189,GO:0007264,GO:0007265,GO:…	ko:K01768	ko00230,ko02025,ko04113,ko04213,map00230,map02025,map04113,map04213	Ad_cyc_g-alpha,Guanylate_cyc,LRR_8,PP2C	OTHER	1	0	NA	NA	NA	NA	NA	NA
35432	By matching	By matching	By matching	By matching	By MS/MS	By MS/MS	7122700	17377000	5979500	15591000	21701000	27415000	0	5890100	0	4922500	3694400	5345400	710696.Intca_0332	2.99e-139	401	COG3386@1|root,COG3386@2|Bacteria,2GNV1@201174|Actinobacteria,4FGI6@85021|Intrasporangiaceae	201174|Actinobacteria	G	SMP-30/Gluconolaconase/LRE-like region	NA	NA	NA	NA	SGL	OTHER	0.999295	0.000736	NA	NA	NA	NA	NA	NA
37271	NA	NA	NA	NA	By MS/MS	By MS/MS	0	0	0	0	14886000	3358600	0	0	0	0	0	0	NA	NA	NA	NA	NA	NA	NA	NA	NA	NA	NA	NA	OTHER	1	0	NA	NA	NA	NA	NA	NA
40590	By MS/MS	By MS/MS	By MS/MS	By MS/MS	By MS/MS	By MS/MS	2238500000	1584700000	1889300000	2427200000	9222600000	6854700000	1566600000	678810000	1551800000	875990000	1437200000	1818100000	552467.XP_003196584.1	4.22e-42	154	COG1881@1|root,KOG3346@2759|Eukaryota,3A5CI@33154|Opisthokonta,3P3ZA@4751|Fungi,3V1S4@5204|Basidiomycota,3VFZ2@5234|Tremellales	4751|Fungi	S	Phosphatidylethanolamine-binding protein	NA	NA	NA	NA	PBP	SP	0.000241	0.999744	CS pos: 16-17. Pr: 0.9796	NA	NA	NA	NA	NA
41209	By MS/MS	By MS/MS	By MS/MS	By MS/MS	By MS/MS	By MS/MS	174900000	146660000	207930000	320590000	735820000	1455600000	59419000	40553000	103990000	124340000	81013000	237540000	82508.K1VT51	9.39e-118	361	2CNG7@1|root,2QW31@2759|Eukaryota,39JCP@33154|Opisthokonta,3P0TS@4751|Fungi,3UYQH@5204|Basidiomycota,3VGFF@5234|Tremellales	4751|Fungi	-	-	NA	NA	NA	NA	-	SP	0.003709	0.996247	CS pos: 16-17. Pr: 0.9503	NA	NA	NA	NA	NA
42465	NA	NA	NA	By MS/MS	By MS/MS	By MS/MS	0	0	0	1369900	2610600	1338200	0	0	0	0	0	0	82508.K1WE69	2.39e-216	645	KOG1721@1|root,KOG1721@2759|Eukaryota,39T3J@33154|Opisthokonta,3NUFJ@4751|Fungi,3V20X@5204|Basidiomycota,3VE4Z@5234|Tremellales	4751|Fungi	S	Zinc finger, C2H2 type	NA	NA	ko:K21543	NA	zf-C2H2	OTHER	1	0	NA	NA	NA	NA	NA	NA
42912	By matching	By MS/MS	By matching	By matching	By MS/MS	By MS/MS	7068100	18915000	6057500	24626000	51319000	40894000	4751300	4978300	4835600	6696500	4595000	4411300	5217.XP_007003788.1	2.02e-83	273	KOG0037@1|root,KOG0037@2759|Eukaryota,38DBU@33154|Opisthokonta,3NX54@4751|Fungi,3V1M5@5204|Basidiomycota,3VGTY@5234|Tremellales	4751|Fungi	T	EF-hand domain pair	NA	GO:0000003,GO:0000278,GO:0000281,GO:0000282,GO:0000910,GO:0003400,GO:0003674,GO:0003824,GO:0004175,GO:0004197,GO:0004198,GO:0005488,GO:0005509,GO:0005575,GO:0005622,GO:0005623,GO:0005634,GO:0005737,GO:0005829,GO:0005933,GO:0005935,GO:0006508,GO:0006807,GO:0007049,GO:0007114,GO:0007120,GO:0007121,GO:0007163,GO:0008150,GO:0008152,GO:0008233,GO:0008234,GO:0008270,GO:0009987,GO:0016787,GO:0019538,GO:…	NA	NA	EF-hand_1,EF-hand_5,EF-hand_6,EF-hand_7,EF-hand_8	OTHER	1	0	NA	NA	NA	NA	NA	NA
47906	NA	NA	NA	NA	By MS/MS	By matching	0	0	0	0	10357000	5072400	0	0	0	0	0	0	5207.AAW41181	1.1e-220	629	29MVY@1|root,2RV66@2759|Eukaryota,39UMF@33154|Opisthokonta,3PV7K@4751|Fungi,3V3UA@5204|Basidiomycota,3VEGT@5234|Tremellales	4751|Fungi	S	Protein of unknown function (DUF563)	NA	NA	NA	NA	DUF563	OTHER	0.753895	0.246109	NA	NA	NA	NA	NA	NA
47999	By MS/MS	By MS/MS	By MS/MS	By MS/MS	By MS/MS	By MS/MS	85987000	223040000	89966000	124850000	152040000	126500000	20285000	27366000	18187000	11723000	6203300	6974700	82508.K1W1D9	1.48e-208	586	COG0183@1|root,KOG1389@2759|Eukaryota,38F89@33154|Opisthokonta,3NX2U@4751|Fungi,3V00E@5204|Basidiomycota,3VHGE@5234|Tremellales	4751|Fungi	I	Thiolase, N-terminal domain	NA	NA	ko:K07513	ko00071,ko00280,ko00592,ko01040,ko01100,ko01110,ko01130,ko01212,ko03320,ko04146,map00071,map00280,map00592,map01040,map01100,map01110,map01130,map01212,map03320,map04146	Thiolase_C,Thiolase_N	OTHER	1	0	NA	NA	NA	NA	NA	NA
51825	By MS/MS	By MS/MS	By MS/MS	By MS/MS	By matching	By MS/MS	8950600	21595000	6381700	17419000	34538000	19172000	5358800	5617600	5118000	5381200	4317500	3969600	82508.K1VGI3	8.02e-104	317	COG5272@1|root,KOG0011@2759|Eukaryota,38CFS@33154|Opisthokonta,3NWKD@4751|Fungi,3UZVD@5204|Basidiomycota,3VE5Q@5234|Tremellales	4751|Fungi	L	XPC-binding domain	RAD23	GO:0000109,GO:0000111,GO:0000122,GO:0000502,GO:0003674,GO:0003676,GO:0003677,GO:0003684,GO:0005488,GO:0005515,GO:0005575,GO:0005622,GO:0005623,GO:0005634,GO:0005737,GO:0005739,GO:0006139,GO:0006259,GO:0006281,GO:0006289,GO:0006355,GO:0006357,GO:0006464,GO:0006508,GO:0006511,GO:0006517,GO:0006725,GO:0006807,GO:0006950,GO:0006974,GO:0008150,GO:0008152,GO:0009056,GO:0009057,GO:0009100,GO:0009889,GO:…	ko:K10839	ko03420,ko04141,map03420,map04141	UBA,XPC-binding,ubiquitin	OTHER	1	8e-06	NA	NA	NA	NA	NA	NA
52437	By MS/MS	By MS/MS	By MS/MS	By MS/MS	By MS/MS	By MS/MS	3323500000	1402000000	1159800000	182580000	4694000000	3528700000	2271200000	844540000	1409400000	326130000	1173800000	1123100000	NA	NA	NA	NA	NA	NA	NA	NA	NA	NA	NA	NA	SP	0.000368	0.999607	CS pos: 18-19. Pr: 0.6686	NA	NA	NA	NA	NA
52522	By matching	By MS/MS	By matching	By MS/MS	By MS/MS	By MS/MS	5782600	6806900	5934500	14334000	11602000	0	0	0	0	2621600	1577300	0	82508.K1VKD0	5.43000000000644e-313	874	COG0513@1|root,KOG0335@2759|Eukaryota,38IV8@33154|Opisthokonta,3NUJV@4751|Fungi,3UYZR@5204|Basidiomycota,3VEEI@5234|Tremellales	4751|Fungi	A	Belongs to the DEAD box helicase family	ded1	GO:0002181,GO:0002183,GO:0003674,GO:0003676,GO:0003723,GO:0003724,GO:0003743,GO:0003824,GO:0004004,GO:0004386,GO:0005488,GO:0005575,GO:0005622,GO:0005623,GO:0005634,GO:0005730,GO:0005737,GO:0006139,GO:0006412,GO:0006413,GO:0006518,GO:0006725,GO:0006807,GO:0008026,GO:0008135,GO:0008150,GO:0008152,GO:0008186,GO:0009058,GO:0009059,GO:0009892,GO:0009987,GO:0010033,GO:0010467,GO:0010468,GO:0010501,GO:…	ko:K11594	ko04622,ko05161,ko05203,map04622,map05161,map05203	DEAD,Helicase_C	OTHER	1	0	NA	NA	NA	NA	NA	NA
55922	By MS/MS	By MS/MS	By MS/MS	By MS/MS	By MS/MS	By MS/MS	51139000	99808000	36138000	100600000	173110000	98345000	12274000	15773000	11410000	14285000	9777400	9003100	5207.AAW45027	0	964	COG0119@1|root,KOG2367@2759|Eukaryota,38SM6@33154|Opisthokonta,3NVRE@4751|Fungi,3UZ1M@5204|Basidiomycota,3VFGY@5234|Tremellales	4751|Fungi	E	LeuA allosteric (dimerisation) domain	LEU4	GO:0003674,GO:0003824,GO:0003852,GO:0005488,GO:0005515,GO:0005575,GO:0005622,GO:0005623,GO:0005737,GO:0005739,GO:0006082,GO:0006520,GO:0006551,GO:0006807,GO:0008150,GO:0008152,GO:0008652,GO:0009058,GO:0009081,GO:0009082,GO:0009098,GO:0009987,GO:0016053,GO:0016740,GO:0016746,GO:0019752,GO:0043226,GO:0043227,GO:0043229,GO:0043231,GO:0043436,GO:0044237,GO:0044238,GO:0044249,GO:0044281,GO:0044283,GO:…	ko:K01649	ko00290,ko00620,ko01100,ko01110,ko01210,ko01230,map00290,map00620,map01100,map01110,map01210,map01230	HMGL-like,LeuA_dimer	OTHER	1	0	NA	NA	NA	NA	NA	NA
56183	By MS/MS	By MS/MS	By MS/MS	By MS/MS	By MS/MS	By MS/MS	3717500	27743000	9352100	16344000	51173000	34444000	0	8277100	5776600	6639500	6761600	8839200	552467.XP_003193804.1	8.11e-48	160	COG1513@1|root,2RY7W@2759|Eukaryota,3A681@33154|Opisthokonta,3Q6VR@4751|Fungi,3V7WM@5204|Basidiomycota	4751|Fungi	E	Catalyzes the reaction of cyanate with bicarbonate to produce ammonia and carbon dioxide	cyn1	NA	ko:K01725	ko00910,map00910	Cyanate_lyase	OTHER	1	2.8e-05	NA	NA	NA	NA	NA	NA
59543	By MS/MS	By MS/MS	By MS/MS	By MS/MS	By MS/MS	By MS/MS	1830100	11311000	3687100	146670000	336300000	100350000	0	5466000	0	33785000	35787000	14441000	552467.XP_003193916.1	1.35e-40	142	2E950@1|root,2SFIN@2759|Eukaryota,3AE4X@33154|Opisthokonta,3P8WF@4751|Fungi,3V2VW@5204|Basidiomycota,3VFRW@5234|Tremellales	4751|Fungi	S	Mitochondrial ribosomal protein L27	NA	NA	ko:K17422	NA	MRP-L27	OTHER	1	0	NA	NA	NA	NA	NA	NA
61664	By MS/MS	By MS/MS	NA	NA	By MS/MS	NA	3879200	10319000	0	0	4876900	0	2550200	4038900	0	0	0	0	552467.XP_003194719.1	3.43e-228	632	COG1163@1|root,KOG1486@2759|Eukaryota,39QXU@33154|Opisthokonta,3NU94@4751|Fungi,3UXYV@5204|Basidiomycota,3VE08@5234|Tremellales	4751|Fungi	T	C-terminal region of MMR_HSR1 domain	RBG2	GO:0000166,GO:0001882,GO:0001883,GO:0002181,GO:0003674,GO:0005488,GO:0005515,GO:0005525,GO:0005575,GO:0005622,GO:0005623,GO:0005737,GO:0006412,GO:0006518,GO:0006807,GO:0008150,GO:0008152,GO:0009058,GO:0009059,GO:0009987,GO:0010467,GO:0010646,GO:0010647,GO:0017076,GO:0019001,GO:0019538,GO:0032101,GO:0032103,GO:0032104,GO:0032106,GO:0032107,GO:0032109,GO:0032549,GO:0032550,GO:0032553,GO:0032555,GO:…	ko:K06944	NA	MMR_HSR1,MMR_HSR1_Xtn,TGS	OTHER	0.999918	0.000126	NA	NA	NA	NA	NA	NA
68226	By MS/MS	NA	By MS/MS	NA	By MS/MS	NA	1460200	0	1812400	0	5557100	0	0	0	0	0	0	0	5207.AAW41633	5.92e-212	590	COG0470@1|root,KOG2035@2759|Eukaryota,38FUD@33154|Opisthokonta,3NWCC@4751|Fungi,3UYK2@5204|Basidiomycota,3VDCT@5234|Tremellales	4751|Fungi	L	Replication factor C C-terminal domain	RFC5	GO:0000228,GO:0000785,GO:0000790,GO:0000819,GO:0003674,GO:0003676,GO:0003677,GO:0003689,GO:0003824,GO:0005488,GO:0005575,GO:0005622,GO:0005623,GO:0005634,GO:0005657,GO:0005663,GO:0005694,GO:0006139,GO:0006259,GO:0006260,GO:0006261,GO:0006271,GO:0006272,GO:0006281,GO:0006725,GO:0006807,GO:0006950,GO:0006974,GO:0006996,GO:0007049,GO:0007059,GO:0007062,GO:0008094,GO:0008150,GO:0008152,GO:0009058,GO:…	ko:K10756	ko03030,ko03420,ko03430,map03030,map03420,map03430	DNA_pol3_delta2	OTHER	1	0	NA	NA	NA	NA	NA	NA
70840	By matching	By MS/MS	By MS/MS	By MS/MS	By matching	By MS/MS	21634000	0	0	136490000	413290000	223970000	0	0	0	0	0	0	NA	NA	NA	NA	NA	NA	NA	NA	NA	NA	NA	NA	OTHER	1	0	NA	NA	NA	NA	NA	NA
72322	NA	By matching	NA	By matching	By MS/MS	By matching	0	521420	0	1146900	53504000	771060	0	0	0	0	0	0	5207.AAW41422	1.78e-09	66.6	2E4PI@1|root,2SBIV@2759|Eukaryota,3AD6Z@33154|Opisthokonta,3P8EW@4751|Fungi,3V332@5204|Basidiomycota,3VG51@5234|Tremellales	4751|Fungi	-	-	NA	NA	NA	NA	-	OTHER	1	0	NA	NA	NA	NA	NA	NA
72678	By MS/MS	By MS/MS	By MS/MS	By MS/MS	By MS/MS	By MS/MS	11633000	9828600	13609000	0	18142000	25517000	5202000	3692900	6340000	0	1662300	3367200	82508.K1VLA0	4.41e-125	364	COG1741@1|root,2RXW4@2759|Eukaryota,3A01A@33154|Opisthokonta,3P25M@4751|Fungi,3V0EK@5204|Basidiomycota,3VE8H@5234|Tremellales	4751|Fungi	S	Pirin	NA	NA	ko:K06911	NA	Pirin	OTHER	1	1e-06	NA	NA	NA	NA	NA	NA
73237	By matching	By MS/MS	By matching	By MS/MS	By MS/MS	By MS/MS	3241300	7412000	3098100	24424000	61760000	10366000	0	3167700	0	5552200	9724700	2918000	82508.K1VY01	1.93e-228	659	COG5076@1|root,KOG1474@2759|Eukaryota,38EH8@33154|Opisthokonta,3NVXS@4751|Fungi,3VBT0@5204|Basidiomycota,3VDNH@5234|Tremellales	4751|Fungi	K	Bromodomain extra-terminal - transcription regulation	BDF1	GO:0000228,GO:0000785,GO:0000790,GO:0000812,GO:0001047,GO:0001067,GO:0001085,GO:0001091,GO:0001094,GO:0001098,GO:0001099,GO:0001672,GO:0003674,GO:0003676,GO:0003677,GO:0003682,GO:0005488,GO:0005515,GO:0005575,GO:0005622,GO:0005623,GO:0005634,GO:0005694,GO:0006139,GO:0006259,GO:0006281,GO:0006325,GO:0006338,GO:0006351,GO:0006355,GO:0006725,GO:0006807,GO:0006950,GO:0006974,GO:0006996,GO:0008134,GO:…	ko:K11684	NA	BET,Bromodomain	OTHER	1	0	NA	NA	NA	NA	NA	NA
73599	By MS/MS	By MS/MS	By MS/MS	By MS/MS	By MS/MS	By MS/MS	23598000	69456000	23131000	131280000	216230000	150130000	11055000	11632000	9018800	12164000	12065000	10124000	82508.K1W541	7.64e-187	528	COG1601@1|root,KOG2767@2759|Eukaryota,38DWM@33154|Opisthokonta,3NUY5@4751|Fungi,3UZB1@5204|Basidiomycota,3VDUV@5234|Tremellales	4751|Fungi	J	Domain found in IF2B/IF5	TIF5	GO:0001732,GO:0002181,GO:0002183,GO:0003674,GO:0003676,GO:0003723,GO:0003743,GO:0005092,GO:0005096,GO:0005488,GO:0005515,GO:0005575,GO:0005622,GO:0005623,GO:0005737,GO:0005829,GO:0005840,GO:0006412,GO:0006413,GO:0006417,GO:0006446,GO:0006518,GO:0006807,GO:0006996,GO:0008047,GO:0008135,GO:0008150,GO:0008152,GO:0009058,GO:0009059,GO:0009889,GO:0009890,GO:0009892,GO:0009987,GO:0010467,GO:0010468,GO:…	ko:K03262	ko03013,ko04214,map03013,map04214	W2,eIF-5_eIF-2B	OTHER	1	0	NA	NA	NA	NA	NA	NA
75965	By MS/MS	By MS/MS	By MS/MS	By MS/MS	By MS/MS	By MS/MS	10808000	59276000	22922000	59712000	113480000	118520000	7760200	11642000	7037500	15412000	9346400	9407800	82508.K1WNV6	1.03e-107	339	KOG0116@1|root,KOG0116@2759|Eukaryota,390RG@33154|Opisthokonta,3NXYT@4751|Fungi,3V00W@5204|Basidiomycota,3VDD3@5234|Tremellales	4751|Fungi	A	Nuclear transport factor 2 (NTF2) domain	NA	GO:0000932,GO:0003674,GO:0003676,GO:0003723,GO:0003729,GO:0005488,GO:0005575,GO:0005622,GO:0005623,GO:0005737,GO:0005829,GO:0006464,GO:0006508,GO:0006807,GO:0006914,GO:0008150,GO:0008152,GO:0009056,GO:0009987,GO:0010494,GO:0016236,GO:0016579,GO:0019538,GO:0032386,GO:0032879,GO:0032991,GO:0034517,GO:0035770,GO:0035973,GO:0036211,GO:0036464,GO:0043021,GO:0043170,GO:0043226,GO:0043228,GO:0043229,GO:…	ko:K19718	ko04139,map04139	NTF2,RRM_1	OTHER	1	2e-05	NA	NA	NA	NA	NA	NA
76203	By MS/MS	By MS/MS	By MS/MS	By MS/MS	By MS/MS	By MS/MS	66450000	198740000	69835000	161770000	207230000	152680000	17646000	30770000	17036000	19302000	12561000	11830000	5207.AAW43553	0	1122	COG3957@1|root,2QUUF@2759|Eukaryota,39R9S@33154|Opisthokonta,3NWRX@4751|Fungi,3UZC7@5204|Basidiomycota,3VEQA@5234|Tremellales	4751|Fungi	G	D-xylulose 5-phosphate/D-fructose 6-phosphate phosphoketolase	NA	NA	ko:K01621	ko00030,ko00710,ko01100,ko01120,map00030,map00710,map01100,map01120	XFP,XFP_C,XFP_N	OTHER	1	0	NA	NA	NA	NA	NA	NA
76427	NA	NA	By MS/MS	NA	NA	NA	0	0	1061200	0	0	0	0	0	0	0	0	0	5217.XP_007002040.1	0	972	COG0204@1|root,2QQ2N@2759|Eukaryota,38VQI@33154|Opisthokonta,3NVRF@4751|Fungi,3UY5Y@5204|Basidiomycota,3VENF@5234|Tremellales	4751|Fungi	I	glycerol-3-phosphate O-acyltransferase	SCT1	GO:0003674,GO:0003824,GO:0004366,GO:0005575,GO:0005622,GO:0005623,GO:0005737,GO:0005783,GO:0005789,GO:0006629,GO:0006644,GO:0006793,GO:0006796,GO:0008150,GO:0008152,GO:0008374,GO:0008610,GO:0008654,GO:0009058,GO:0009987,GO:0012505,GO:0016020,GO:0016021,GO:0016287,GO:0016407,GO:0016413,GO:0016740,GO:0016746,GO:0016747,GO:0019637,GO:0030176,GO:0031224,GO:0031227,GO:0031984,GO:0042175,GO:0043226,GO:…	ko:K13507	ko00561,ko00564,ko01100,ko01110,map00561,map00564,map01100,map01110	Acyltransferase	OTHER	0.999537	0.000482	NA	NA	NA	NA	NA	NA
78164	By matching	By MS/MS	By matching	By MS/MS	By MS/MS	By matching	1773000	26331000	1552600	22522000	116380000	7412300	0	6516500	0	4560700	10145000	0	82508.K1WKS6	0	1035	COG5147@1|root,KOG0050@2759|Eukaryota,38D9Q@33154|Opisthokonta,3NU2G@4751|Fungi,3UXYJ@5204|Basidiomycota,3VD63@5234|Tremellales	4751|Fungi	K	pre-mRNA splicing factor component	CEF1	GO:0000350,GO:0000375,GO:0000377,GO:0000393,GO:0000398,GO:0000974,GO:0000981,GO:0000988,GO:0000989,GO:0001067,GO:0001076,GO:0001134,GO:0001135,GO:0003674,GO:0003676,GO:0003677,GO:0003700,GO:0005488,GO:0005575,GO:0005622,GO:0005623,GO:0005634,GO:0005681,GO:0005684,GO:0005737,GO:0005829,GO:0006139,GO:0006355,GO:0006357,GO:0006396,GO:0006397,GO:0006725,GO:0006807,GO:0008150,GO:0008152,GO:0008380,GO:…	ko:K12860	ko03040,map03040	Myb_Cef,Myb_DNA-binding	OTHER	1	0	NA	NA	NA	NA	NA	NA
78213	By matching	By MS/MS	By MS/MS	By MS/MS	By MS/MS	By MS/MS	15702000	18202000	14727000	142170000	187320000	107870000	6389800	4719400	5624600	44093000	25273000	19535000	82508.K1VBB1	1.09e-38	150	KOG2483@1|root,KOG2483@2759|Eukaryota,3A8S2@33154|Opisthokonta,3P7H5@4751|Fungi,3V2P0@5204|Basidiomycota,3VFVK@5234|Tremellales	4751|Fungi	K	helix loop helix domain	NA	GO:0000976,GO:0000977,GO:0000978,GO:0000981,GO:0000982,GO:0000987,GO:0001012,GO:0001067,GO:0003674,GO:0003676,GO:0003677,GO:0003690,GO:0003700,GO:0005488,GO:0006355,GO:0006357,GO:0008150,GO:0009889,GO:0009891,GO:0009893,GO:0010468,GO:0010514,GO:0010556,GO:0010557,GO:0010604,GO:0010628,GO:0019219,GO:0019222,GO:0031136,GO:0031137,GO:0031139,GO:0031140,GO:0031141,GO:0031323,GO:0031325,GO:0031326,GO:…	NA	NA	HLH	OTHER	1	0	NA	NA	NA	NA	NA	NA
78634	By MS/MS	By MS/MS	By MS/MS	By MS/MS	By MS/MS	By MS/MS	257730000	460990000	225330000	327720000	725460000	349280000	57889000	61502000	50960000	33232000	33092000	27870000	82508.K1VP81	3.68e-175	503	COG0625@1|root,KOG1627@1|root,KOG0867@2759|Eukaryota,KOG1627@2759|Eukaryota,38CDH@33154|Opisthokonta,3NUBV@4751|Fungi,3UYA4@5204|Basidiomycota,3VDBE@5234|Tremellales	4751|Fungi	J	Elongation factor 1-gamma (ef-1-gamma)	NA	GO:0002181,GO:0002182,GO:0003674,GO:0003676,GO:0003723,GO:0003746,GO:0003824,GO:0004364,GO:0005488,GO:0005575,GO:0005622,GO:0005623,GO:0005634,GO:0005737,GO:0006412,GO:0006414,GO:0006518,GO:0006575,GO:0006749,GO:0006790,GO:0006807,GO:0008135,GO:0008150,GO:0008152,GO:0009058,GO:0009059,GO:0009987,GO:0010467,GO:0016740,GO:0016765,GO:0019538,GO:0034641,GO:0034645,GO:0043043,GO:0043170,GO:0043226,GO:…	ko:K03233	ko05134,map05134	EF1G,GST_C,GST_C_3,GST_N	OTHER	1	0	NA	NA	NA	NA	NA	NA
80195	NA	By MS/MS	NA	NA	NA	NA	0	0	0	0	0	0	0	0	0	0	0	0	82508.K1VBP3	3.09e-97	293	COG1024@1|root,KOG0016@2759|Eukaryota,38F2P@33154|Opisthokonta,3NXV1@4751|Fungi,3V1BW@5204|Basidiomycota	4751|Fungi	I	Enoyl-CoA hydratase/isomerase	NA	NA	ko:K13239	ko00071,ko04146,map00071,map04146	ECH_1	OTHER	1	0	NA	NA	NA	NA	NA	NA
80470	By MS/MS	By MS/MS	By matching	By MS/MS	By MS/MS	By MS/MS	7338800	12934000	4411600	13641000	24777000	30135000	5238300	7016700	0	0	4611400	5293800	82508.K1VX01	1.95e-174	498	COG0665@1|root,KOG2852@2759|Eukaryota,38D0X@33154|Opisthokonta,3NU73@4751|Fungi,3UY7H@5204|Basidiomycota,3VCVS@5234|Tremellales	4751|Fungi	E	Cytoplasm protein	NA	GO:0000003,GO:0003674,GO:0003824,GO:0005575,GO:0005622,GO:0005623,GO:0005737,GO:0005739,GO:0005768,GO:0005770,GO:0006810,GO:0007049,GO:0008150,GO:0008152,GO:0009987,GO:0012505,GO:0016192,GO:0016197,GO:0016482,GO:0016491,GO:0022414,GO:0031410,GO:0031982,GO:0042147,GO:0043226,GO:0043227,GO:0043229,GO:0043231,GO:0044424,GO:0044444,GO:0044464,GO:0046907,GO:0051179,GO:0051234,GO:0051321,GO:0051641,GO:…	NA	NA	DAO	OTHER	0.99779	0.002212	NA	NA	NA	NA	NA	NA
82737	NA	By MS/MS	By matching	By MS/MS	By MS/MS	NA	0	4404600	1129700	3577800	5969200	0	0	0	0	0	0	0	5217.XP_007004471.1	3.18e-297	847	2CMZJ@1|root,2QSY2@2759|Eukaryota,38DF4@33154|Opisthokonta,3NUPW@4751|Fungi,3UZSR@5204|Basidiomycota,3VD4R@5234|Tremellales	4751|Fungi	K	Fungal specific transcription factor domain	GIN1	GO:0000429,GO:0000436,GO:0000976,GO:0000977,GO:0000978,GO:0000981,GO:0000982,GO:0000987,GO:0001012,GO:0001067,GO:0001077,GO:0001228,GO:0003674,GO:0003676,GO:0003677,GO:0003690,GO:0003700,GO:0005488,GO:0005575,GO:0005622,GO:0005623,GO:0005634,GO:0006139,GO:0006351,GO:0006355,GO:0006357,GO:0006366,GO:0006725,GO:0006807,GO:0007154,GO:0007584,GO:0008150,GO:0008152,GO:0008270,GO:0009058,GO:0009059,GO:…	NA	NA	Fungal_trans,Zn_clus	OTHER	1	1e-06	NA	NA	NA	NA	NA	NA
83438	By MS/MS	By MS/MS	By MS/MS	By MS/MS	By MS/MS	By MS/MS	47466000	64809000	53411000	41127000	219030000	186390000	17010000	12974000	19244000	9734700	14819000	20839000	82508.K1VHW2	3.8e-137	397	COG0656@1|root,KOG1577@2759|Eukaryota,39W1H@33154|Opisthokonta,3NY5Y@4751|Fungi,3UZ7V@5204|Basidiomycota,3VCQH@5234|Tremellales	4751|Fungi	S	Aldo/keto reductase family	NA	NA	NA	NA	Aldo_ket_red	OTHER	1	1.2e-05	NA	NA	NA	NA	NA	NA
83940	By MS/MS	By MS/MS	NA	NA	NA	By MS/MS	0	0	0	0	0	22373000	0	0	0	0	0	0	1434929.X946_4524	8.15e-84	256	COG0693@1|root,COG0693@2|Bacteria,1N8N6@1224|Proteobacteria,2VSBY@28216|Betaproteobacteria,1KGSH@119060|Burkholderiaceae	28216|Betaproteobacteria	S	DJ-1/PfpI family	NA	NA	ko:K18199	ko00930,map00930	DJ-1_PfpI	OTHER	0.838365	0.161661	NA	NA	NA	NA	NA	NA
83946	By MS/MS	By MS/MS	By MS/MS	By MS/MS	By MS/MS	By MS/MS	2199200000	1447000000	2544600000	10660000000	25679000000	27260000000	523870000	314230000	1106200000	4107200000	3493200000	7702800000	NA	NA	NA	NA	NA	NA	NA	NA	NA	NA	NA	NA	SP	0.000242	0.999723	CS pos: 18-19. Pr: 0.9805	NA	NA	NA	NA	NA
84958	By matching	NA	NA	By MS/MS	By MS/MS	By MS/MS	2782000	0	0	24469000	236230000	361810000	0	0	0	7016900	11735000	27555000	82508.K1V006	1.91e-211	608	COG2939@1|root,KOG1282@2759|Eukaryota,39R4Q@33154|Opisthokonta,3NV40@4751|Fungi,3UZYW@5204|Basidiomycota,3VGN6@5234|Tremellales	4751|Fungi	O	Belongs to the peptidase S10 family	NA	NA	ko:K01288	NA	Peptidase_S10	OTHER	1	0	NA	NA	NA	NA	NA	NA
85172	By MS/MS	By MS/MS	By MS/MS	By MS/MS	By MS/MS	By MS/MS	268420000	574830000	265990000	263180000	668610000	622310000	64285000	95385000	76673000	34602000	34659000	43894000	82508.K1VPF5	3.77e-166	469	COG3485@1|root,2QU2V@2759|Eukaryota,38B9N@33154|Opisthokonta,3NU8P@4751|Fungi,3V0E7@5204|Basidiomycota	4751|Fungi	E	Catechol dioxygenase N terminus	HQD2	GO:0003674,GO:0003824,GO:0005488,GO:0005506,GO:0006725,GO:0008150,GO:0008152,GO:0008199,GO:0009056,GO:0009712,GO:0009987,GO:0016491,GO:0016701,GO:0016702,GO:0018576,GO:0018958,GO:0019114,GO:0019336,GO:0019439,GO:0019614,GO:0019615,GO:0042952,GO:0043167,GO:0043169,GO:0044237,GO:0044248,GO:0046872,GO:0046914,GO:0051213,GO:0055114,GO:0071704,GO:1901360,GO:1901361,GO:1901575,GO:1901615,GO:1901616	ko:K03381	ko00361,ko00362,ko00364,ko00623,ko01100,ko01120,ko01220,map00361,map00362,map00364,map00623,map01100,map01120,map01220	Dioxygenase_C,Dioxygenase_N	OTHER	1	0	NA	NA	NA	NA	NA	NA
85257	By MS/MS	By MS/MS	By MS/MS	By MS/MS	By MS/MS	By MS/MS	9990800	16998000	8953400	25608000	36285000	22637000	5476200	5548800	5277800	6162000	4100700	4415400	82508.K1WN23	2.69e-74	236	COG1028@1|root,KOG0725@2759|Eukaryota,3949X@33154|Opisthokonta,3NW0W@4751|Fungi	4751|Fungi	Q	Dehydrogenase	NA	NA	NA	NA	adh_short_C2	OTHER	1	0	NA	NA	NA	NA	NA	NA
87148	NA	By matching	NA	By matching	By MS/MS	NA	0	517330	0	8207100	16367000	0	0	0	0	0	0	0	82508.K1VRL0	3.97e-37	137	2AZ0C@1|root,2S7WA@2759|Eukaryota,3AXNI@33154|Opisthokonta,3PITG@4751|Fungi,3V6UN@5204|Basidiomycota,3VFZW@5234|Tremellales	4751|Fungi	S	Fungal domain of unknown function (DUF1750)	NA	NA	NA	NA	SWI-SNF_Ssr4	OTHER	1	0	NA	NA	NA	NA	NA	NA
88200	By MS/MS	By MS/MS	By MS/MS	By MS/MS	By MS/MS	By MS/MS	6912200000	5012300000	6083200000	5911700000	14974000000	14808000000	2973900000	1522600000	2457300000	1418100000	1696400000	2651700000	82508.K1V1B2	2.74e-121	365	COG0726@1|root,2QZU8@2759|Eukaryota,39V04@33154|Opisthokonta,3NZUV@4751|Fungi,3V06G@5204|Basidiomycota,3VEBE@5234|Tremellales	4751|Fungi	O	Polysaccharide deacetylase	NA	GO:0003674,GO:0003824,GO:0004099,GO:0005575,GO:0008150,GO:0009653,GO:0009987,GO:0010927,GO:0016020,GO:0016043,GO:0016787,GO:0016810,GO:0016811,GO:0019213,GO:0022607,GO:0030154,GO:0030435,GO:0032502,GO:0032989,GO:0042244,GO:0042546,GO:0043934,GO:0044085,GO:0045229,GO:0048646,GO:0048856,GO:0048869,GO:0070590,GO:0070726,GO:0071554,GO:0071555,GO:0071840	ko:K01452	ko00520,ko01100,map00520,map01100	Polysacc_deac_1	SP	0.001172	0.998784	CS pos: 13-14. Pr: 0.9314	CE	CE4	NA	CE4:27.1	CE4*8
90387	NA	By MS/MS	NA	NA	By MS/MS	By matching	0	6214100	0	0	2872300	3587600	0	0	0	0	0	0	82508.K1VNL3	2.18e-118	356	COG0631@1|root,KOG1379@2759|Eukaryota,38HMT@33154|Opisthokonta,3NX30@4751|Fungi,3V0QW@5204|Basidiomycota,3VD6V@5234|Tremellales	4751|Fungi	T	Sigma factor PP2C-like phosphatases	PTC7	GO:0003674,GO:0003824,GO:0004721,GO:0004722,GO:0005575,GO:0005622,GO:0005623,GO:0005634,GO:0005635,GO:0005737,GO:0005739,GO:0006464,GO:0006470,GO:0006793,GO:0006796,GO:0006807,GO:0008150,GO:0008152,GO:0009889,GO:0009891,GO:0009893,GO:0009987,GO:0010565,GO:0010566,GO:0010795,GO:0012505,GO:0016311,GO:0016787,GO:0016788,GO:0016791,GO:0019222,GO:0019538,GO:0023052,GO:0031323,GO:0031325,GO:0031326,GO:…	ko:K17508	NA	SpoIIE	OTHER	1	0	NA	NA	NA	NA	NA	NA
92358	By MS/MS	By MS/MS	By MS/MS	By MS/MS	By MS/MS	By MS/MS	91208000	197560000	86525000	197600000	424490000	353920000	20174000	24792000	20477000	25056000	26639000	30186000	82508.K1VMB2	3.46e-140	407	2DZHE@1|root,2S71A@2759|Eukaryota,39KE6@33154|Opisthokonta,3Q4SR@4751|Fungi	4751|Fungi	S	NAD dependent epimerase/dehydratase family	NA	NA	NA	NA	Epimerase	OTHER	0.907715	0.092296	NA	NA	NA	NA	NA	NA
92684	NA	By MS/MS	By matching	By MS/MS	By MS/MS	By matching	0	3611900	1570600	3426700	16008000	4470700	0	0	0	0	0	0	82508.K1VIQ3	3.76e-258	733	KOG4547@1|root,KOG4547@2759|Eukaryota,38HDH@33154|Opisthokonta,3NWZN@4751|Fungi,3UYFY@5204|Basidiomycota,3VDP7@5234|Tremellales	4751|Fungi	S	Dip2/Utp12 Family	UTP5	GO:0000462,GO:0000785,GO:0000792,GO:0003674,GO:0003676,GO:0003723,GO:0005488,GO:0005575,GO:0005622,GO:0005623,GO:0005634,GO:0005694,GO:0005730,GO:0006139,GO:0006355,GO:0006356,GO:0006364,GO:0006396,GO:0006725,GO:0006807,GO:0008150,GO:0008152,GO:0009889,GO:0009891,GO:0009893,GO:0009987,GO:0010467,GO:0010468,GO:0010556,GO:0010557,GO:0010604,GO:0010628,GO:0016070,GO:0016072,GO:0019219,GO:0019222,GO:…	ko:K14546	ko03008,map03008	Utp12	OTHER	0.989107	0.010921	NA	NA	NA	NA	NA	NA
99280	By MS/MS	By MS/MS	By MS/MS	By MS/MS	By MS/MS	By MS/MS	31882000	76085000	36447000	40176000	109080000	49195000	21972000	29978000	21701000	13974000	17191000	9651300	82508.K1WHW4	7.92e-61	192	COG0222@1|root,KOG1715@2759|Eukaryota,3A5P9@33154|Opisthokonta,3P1TG@4751|Fungi,3V1BT@5204|Basidiomycota,3VFWK@5234|Tremellales	4751|Fungi	J	Ribosomal protein L7/L12 C-terminal domain	MNP1	GO:0000313,GO:0000315,GO:0003674,GO:0003735,GO:0005198,GO:0005575,GO:0005622,GO:0005623,GO:0005737,GO:0005739,GO:0005759,GO:0005761,GO:0005762,GO:0005840,GO:0006412,GO:0006518,GO:0006807,GO:0008150,GO:0008152,GO:0009058,GO:0009059,GO:0009295,GO:0009987,GO:0010467,GO:0015934,GO:0019538,GO:0031974,GO:0032543,GO:0032991,GO:0034641,GO:0034645,GO:0042645,GO:0043043,GO:0043170,GO:0043226,GO:0043227,GO:…	ko:K02935	ko03010,map03010	Ribosomal_L12,Ribosomal_L12_N	OTHER	1	0	NA	NA	NA	NA	NA	NA
100448	By MS/MS	By MS/MS	By MS/MS	By MS/MS	By MS/MS	By MS/MS	12753000	19800000	15973000	84101000	165290000	79837000	6968300	6463300	8526900	15161000	16156000	11546000	82508.K1W134	1.84e-239	717	KOG1862@1|root,KOG1862@2759|Eukaryota,38UDY@33154|Opisthokonta,3NUVE@4751|Fungi,3V0ZY@5204|Basidiomycota,3VDP6@5234|Tremellales	4751|Fungi	S	GYF domain	SMY2	GO:0005575,GO:0005622,GO:0005623,GO:0005737,GO:0005739,GO:0005783,GO:0005789,GO:0005829,GO:0006810,GO:0006888,GO:0006996,GO:0006997,GO:0008104,GO:0008150,GO:0009987,GO:0012505,GO:0016020,GO:0016043,GO:0016192,GO:0019898,GO:0031081,GO:0031503,GO:0031984,GO:0033036,GO:0034613,GO:0034629,GO:0042175,GO:0043226,GO:0043227,GO:0043229,GO:0043231,GO:0044422,GO:0044424,GO:0044425,GO:0044432,GO:0044444,GO:…	ko:K18730	NA	GYF	OTHER	0.998679	0.001313	NA	NA	NA	NA	NA	NA
100513	By MS/MS	By MS/MS	By MS/MS	By MS/MS	By MS/MS	By matching	3760500	13443000	3120600	15396000	8006900	11519000	0	3774700	0	2654900	0	0	5217.XP_007008030.1	1.97e-72	234	KOG0917@1|root,KOG0917@2759|Eukaryota,39RB9@33154|Opisthokonta,3NXYH@4751|Fungi,3V0TK@5204|Basidiomycota,3VGTH@5234|Tremellales	4751|Fungi	S	late endosome to vacuole transport-related protein	NA	GO:0005575,GO:0005622,GO:0005623,GO:0005737,GO:0005768,GO:0005770,GO:0005771,GO:0006810,GO:0007034,GO:0008150,GO:0012505,GO:0016192,GO:0016197,GO:0031410,GO:0031982,GO:0032509,GO:0032511,GO:0043226,GO:0043227,GO:0043229,GO:0044424,GO:0044444,GO:0044464,GO:0045324,GO:0046907,GO:0051179,GO:0051234,GO:0051641,GO:0051649,GO:0071985,GO:0097708	ko:K12199	ko04144,map04144	Vta1	OTHER	1	0	NA	NA	NA	NA	NA	NA
104227	By matching	By MS/MS	By matching	By matching	By MS/MS	NA	2248200	11886000	1160100	3828500	18225000	0	0	0	0	0	0	0	82508.K1WME5	0	1238	COG5099@1|root,KOG2049@2759|Eukaryota,38DCC@33154|Opisthokonta,3NWIS@4751|Fungi,3UXZ7@5204|Basidiomycota,3VCVB@5234|Tremellales	4751|Fungi	J	Pumilio-family RNA binding repeat	NA	GO:0000288,GO:0000956,GO:0001301,GO:0001302,GO:0001304,GO:0001308,GO:0003674,GO:0003676,GO:0003723,GO:0003729,GO:0005488,GO:0005575,GO:0005622,GO:0005623,GO:0005737,GO:0006139,GO:0006325,GO:0006355,GO:0006401,GO:0006402,GO:0006417,GO:0006725,GO:0006807,GO:0006996,GO:0007568,GO:0007569,GO:0008104,GO:0008150,GO:0008152,GO:0009056,GO:0009057,GO:0009889,GO:0009890,GO:0009891,GO:0009892,GO:0009893,GO:…	NA	NA	PUF	OTHER	1	0	NA	NA	NA	NA	NA	NA
106486	By MS/MS	By MS/MS	By MS/MS	By matching	By MS/MS	By matching	1360700	7614200	2545000	8999000	8559000	6742000	0	0	0	0	0	0	82508.K1VI32	2.2e-143	432	KOG1039@1|root,KOG1039@2759|Eukaryota,39VRV@33154|Opisthokonta,3NXTM@4751|Fungi,3V1IP@5204|Basidiomycota,3VEFU@5234|Tremellales	4751|Fungi	O	Zinc finger C-x8-C-x5-C-x3-H type (and similar)	NA	NA	ko:K14404	ko03015,ko05164,map03015,map05164	zf-CCCH	OTHER	1	0	NA	NA	NA	NA	NA	NA
107732	NA	By MS/MS	NA	By matching	By MS/MS	By MS/MS	0	4651500	0	5599700	15805000	11816000	0	0	0	1925600	2231100	2353400	82508.K1W4S4	9.07e-175	494	KOG2445@1|root,KOG2445@2759|Eukaryota,38GGF@33154|Opisthokonta,3NU37@4751|Fungi,3V1J9@5204|Basidiomycota,3VEAE@5234|Tremellales	4751|Fungi	U	WD domain, G-beta repeat	SEH1	GO:0000306,GO:0000322,GO:0000323,GO:0000324,GO:0000329,GO:0003674,GO:0005198,GO:0005575,GO:0005622,GO:0005623,GO:0005634,GO:0005635,GO:0005643,GO:0005737,GO:0005773,GO:0005774,GO:0006403,GO:0006405,GO:0006407,GO:0006611,GO:0006810,GO:0006886,GO:0006913,GO:0008104,GO:0008150,GO:0009966,GO:0009967,GO:0010646,GO:0010647,GO:0012505,GO:0015031,GO:0015833,GO:0015931,GO:0016020,GO:0016021,GO:0017056,GO:…	ko:K14299	ko03013,ko04150,map03013,map04150	WD40	OTHER	1	1.9e-05	NA	NA	NA	NA	NA	NA
109385	NA	By MS/MS	NA	By MS/MS	By MS/MS	By MS/MS	0	8494600	0	10920000	21867000	8710800	0	0	0	0	0	0	82508.K1VS68	3.69e-157	461	COG0172@1|root,KOG2509@2759|Eukaryota,38HQ3@33154|Opisthokonta,3NV6W@4751|Fungi,3UZXY@5204|Basidiomycota,3VCWH@5234|Tremellales	4751|Fungi	J	Seryl-tRNA synthetase N-terminal domain	DIA4	GO:0000166,GO:0000959,GO:0003674,GO:0003824,GO:0004812,GO:0004828,GO:0005488,GO:0005524,GO:0005575,GO:0005622,GO:0005623,GO:0005737,GO:0005739,GO:0006082,GO:0006139,GO:0006399,GO:0006412,GO:0006418,GO:0006434,GO:0006518,GO:0006520,GO:0006725,GO:0006807,GO:0008144,GO:0008150,GO:0008152,GO:0009058,GO:0009059,GO:0009987,GO:0010467,GO:0016070,GO:0016874,GO:0016875,GO:0017076,GO:0019538,GO:0019752,GO:…	ko:K01875	ko00970,map00970	Seryl_tRNA_N,tRNA-synt_2b	OTHER	1	0	NA	NA	NA	NA	NA	NA
110363	By MS/MS	By MS/MS	By MS/MS	By MS/MS	By MS/MS	By MS/MS	61363000	141860000	63316000	33211000	217350000	15470000	45449000	35304000	50220000	12396000	14976000	12211000	5207.AAW44248	1.34e-51	162	KOG3057@1|root,KOG3057@2759|Eukaryota,3A5X8@33154|Opisthokonta,3P5BS@4751|Fungi,3V1T2@5204|Basidiomycota,3VFXS@5234|Tremellales	4751|Fungi	C	This protein is one of the nuclear-coded polypeptide chains of cytochrome c oxidase, the terminal oxidase in mitochondrial electron transport	COX12	GO:0005575,GO:0005622,GO:0005623,GO:0005737,GO:0005739,GO:0005740,GO:0005743,GO:0005746,GO:0005751,GO:0005758,GO:0006996,GO:0007005,GO:0008150,GO:0008535,GO:0009987,GO:0016020,GO:0016021,GO:0016043,GO:0017004,GO:0019866,GO:0022607,GO:0031090,GO:0031224,GO:0031966,GO:0031967,GO:0031970,GO:0031974,GO:0031975,GO:0032991,GO:0033108,GO:0033617,GO:0034622,GO:0043226,GO:0043227,GO:0043229,GO:0043231,GO:…	ko:K02267	ko00190,ko01100,ko04260,ko04714,ko04932,ko05010,ko05012,ko05016,map00190,map01100,map04260,map04714,map04932,map05010,map05012,map05016	COX6B	OTHER	1	0	NA	NA	NA	NA	NA	NA
111451	By MS/MS	By MS/MS	By MS/MS	By MS/MS	By MS/MS	By MS/MS	177710000	579950000	291210000	867570000	1952300000	1640300000	51958000	94397000	106850000	148260000	109590000	130360000	82508.K1VJ25	1.74e-110	323	COG0605@1|root,KOG0876@2759|Eukaryota,39RWZ@33154|Opisthokonta,3NZVT@4751|Fungi,3VBU6@5204|Basidiomycota	4751|Fungi	Q	Destroys radicals which are normally produced within the cells and which are toxic to biological systems	sodB	GO:0003674,GO:0005488,GO:0005575,GO:0005622,GO:0005623,GO:0005737,GO:0005739,GO:0005759,GO:0019863,GO:0019865,GO:0030145,GO:0031974,GO:0043167,GO:0043169,GO:0043226,GO:0043227,GO:0043229,GO:0043231,GO:0043233,GO:0044422,GO:0044424,GO:0044429,GO:0044444,GO:0044446,GO:0044464,GO:0044877,GO:0046872,GO:0046914,GO:0070013	ko:K04564	ko04013,ko04068,ko04146,ko04211,ko04212,ko04213,ko05016,map04013,map04068,map04146,map04211,map04212,map04213,map05016	Sod_Fe_C,Sod_Fe_N	OTHER	1	0	NA	NA	NA	NA	NA	NA
112361	By MS/MS	By MS/MS	By MS/MS	By MS/MS	By MS/MS	By MS/MS	14389000	34223000	15395000	25457000	40676000	10101000	6547600	14968000	7953800	7407400	4240200	0	552467.XP_003192938.1	1.99e-127	364	KOG0078@1|root,KOG0078@2759|Eukaryota,38GT3@33154|Opisthokonta,3NXRR@4751|Fungi,3UZ7S@5204|Basidiomycota,3VDVG@5234|Tremellales	4751|Fungi	U	Rab subfamily of small GTPases	SEC4	GO:0000003,GO:0000131,GO:0000166,GO:0000910,GO:0001411,GO:0001882,GO:0001883,GO:0002790,GO:0003006,GO:0003674,GO:0003824,GO:0003924,GO:0005488,GO:0005525,GO:0005575,GO:0005622,GO:0005623,GO:0005628,GO:0005737,GO:0005739,GO:0005740,GO:0005741,GO:0005768,GO:0005783,GO:0005815,GO:0005816,GO:0005856,GO:0005886,GO:0005933,GO:0005934,GO:0005935,GO:0005937,GO:0006810,GO:0006886,GO:0006887,GO:0006892,GO:…	ko:K07901,ko:K18158	ko04144,ko04152,ko04530,ko04972,map04144,map04152,map04530,map04972	Ras	OTHER	1	0	NA	NA	NA	NA	NA	NA
113442	NA	By MS/MS	NA	By MS/MS	By MS/MS	By matching	0	4612800	0	8858800	38498000	12668000	0	3048200	0	2490600	2510100	2853000	82508.K1VHM0	3.48e-223	624	COG0024@1|root,KOG2775@2759|Eukaryota,38BDD@33154|Opisthokonta,3NUPF@4751|Fungi,3UZ8N@5204|Basidiomycota,3VCPN@5234|Tremellales	4751|Fungi	J	Cotranslationally removes the N-terminal methionine from nascent proteins. The N-terminal methionine is often cleaved when the second residue in the primary sequence is small and uncharged (Met-Ala-, Cys, Gly, Pro, Ser, Thr, or Val)	MAP2	GO:0003674,GO:0003824,GO:0004177,GO:0005575,GO:0005622,GO:0005623,GO:0005634,GO:0005737,GO:0006464,GO:0006508,GO:0006807,GO:0008150,GO:0008152,GO:0008233,GO:0008235,GO:0008237,GO:0008238,GO:0009987,GO:0010467,GO:0016485,GO:0016787,GO:0019538,GO:0035551,GO:0036211,GO:0043170,GO:0043226,GO:0043227,GO:0043229,GO:0043231,GO:0043412,GO:0044237,GO:0044238,GO:0044260,GO:0044267,GO:0044424,GO:0044464,GO:…	ko:K01265	NA	Peptidase_M24	OTHER	1	0	NA	NA	NA	NA	NA	NA
115279	NA	By MS/MS	NA	NA	NA	NA	0	0	0	0	0	0	0	0	0	0	0	0	5507.FOXG_09912P0	5.47e-92	295	COG2272@1|root,KOG1516@2759|Eukaryota,38EQ2@33154|Opisthokonta,3NX7C@4751|Fungi,3QR31@4890|Ascomycota,217W8@147550|Sordariomycetes,3TPIJ@5125|Hypocreales,1FWCR@110618|Nectriaceae	4751|Fungi	I	Belongs to the type-B carboxylesterase lipase family	NA	GO:0003674,GO:0003824,GO:0016787,GO:0016788,GO:0052689	NA	NA	COesterase,DnaJ,zf-CSL	OTHER	1	1e-06	NA	NA	NA	NA	NA	NA
117915	By matching	By MS/MS	By matching	By MS/MS	By MS/MS	By MS/MS	15225000	27411000	14029000	290780000	340500000	214550000	4435200	4202900	4471500	50162000	25589000	22121000	82508.K1WS39	2.81e-60	204	KOG0118@1|root,KOG0118@2759|Eukaryota,38H0V@33154|Opisthokonta,3P5PC@4751|Fungi,3V184@5204|Basidiomycota,3VFF1@5234|Tremellales	4751|Fungi	A	RNA recognition motif. (a.k.a. RRM, RBD, or RNP domain)	NA	NA	ko:K12897	ko03040,map03040	RRM_1	OTHER	0.999417	0.000588	NA	NA	NA	NA	NA	NA
118348	By MS/MS	By MS/MS	By MS/MS	By MS/MS	By MS/MS	By MS/MS	9992200	31470000	2049700	22764000	25247000	21574000	4383300	6600300	0	4356800	2872700	3884600	82508.K1WR42	7.16e-264	730	COG0639@1|root,KOG0374@2759|Eukaryota,38BGF@33154|Opisthokonta,3NUEW@4751|Fungi,3UZJJ@5204|Basidiomycota,3VET7@5234|Tremellales	4751|Fungi	T	Serine-threonine protein phosphatase N-terminal domain	pzh1	GO:0000322,GO:0000323,GO:0000324,GO:0003674,GO:0003824,GO:0004721,GO:0004722,GO:0005575,GO:0005622,GO:0005623,GO:0005634,GO:0005737,GO:0005773,GO:0005886,GO:0006464,GO:0006470,GO:0006793,GO:0006796,GO:0006807,GO:0006873,GO:0006875,GO:0006883,GO:0007154,GO:0007165,GO:0008104,GO:0008150,GO:0008152,GO:0009987,GO:0016020,GO:0016311,GO:0016787,GO:0016788,GO:0016791,GO:0019538,GO:0019725,GO:0019897,GO:…	ko:K06269	ko03015,ko04022,ko04024,ko04113,ko04114,ko04218,ko04261,ko04270,ko04390,ko04510,ko04611,ko04720,ko04728,ko04750,ko04810,ko04910,ko04921,ko04931,ko05031,ko05034,ko05168,ko05205,map03015,map04022,map04024,map04113,map04114,map04218,map04261,map04270,map04390,map04510,map04611,map04720,map04728,map04750,map04810,map04910,map04921,map04931,map05031,map05034,map05168,map05205	Metallophos,STPPase_N	OTHER	1	0	NA	NA	NA	NA	NA	NA
118457	By MS/MS	By MS/MS	By MS/MS	By MS/MS	By MS/MS	By MS/MS	315790000	226940000	211640000	163080000	342300000	157500000	105610000	57333000	109630000	50521000	41149000	29241000	5207.AAW42579	4.69e-88	260	COG5126@1|root,KOG0027@2759|Eukaryota,38ETU@33154|Opisthokonta,3NVWG@4751|Fungi,3UY02@5204|Basidiomycota,3VGCZ@5234|Tremellales	4751|Fungi	T	EF-hand domain	NA	GO:0000003,GO:0003006,GO:0003674,GO:0005488,GO:0005509,GO:0005575,GO:0005622,GO:0005623,GO:0005628,GO:0005737,GO:0005856,GO:0005937,GO:0005938,GO:0006928,GO:0007049,GO:0008150,GO:0009653,GO:0009987,GO:0010927,GO:0015629,GO:0016020,GO:0016043,GO:0016459,GO:0016461,GO:0019953,GO:0022402,GO:0022413,GO:0022414,GO:0022607,GO:0030029,GO:0030048,GO:0030154,GO:0030427,GO:0030435,GO:0030437,GO:0031097,GO:…	ko:K02183	ko04014,ko04015,ko04016,ko04020,ko04022,ko04024,ko04070,ko04114,ko04218,ko04261,ko04270,ko04371,ko04626,ko04713,ko04720,ko04722,ko04728,ko04740,ko04744,ko04745,ko04750,ko04910,ko04912,ko04915,ko04916,ko04921,ko04922,ko04924,ko04925,ko04970,ko04971,ko05010,ko05031,ko05034,ko05133,ko05152,ko05167,ko05200,ko05214,ko05418,map04014,map04015,map04016,map04020,map04022,map04024,map04070,map04114,map0421…	EF-hand_1,EF-hand_5,EF-hand_7	OTHER	1	0	NA	NA	NA	NA	NA	NA
119430	By MS/MS	By matching	By matching	By MS/MS	By MS/MS	By MS/MS	2893300	8914500	2232000	14254000	22162000	5217100	0	0	0	0	0	0	82508.K1VG28	1.62e-158	455	KOG1667@1|root,KOG1667@2759|Eukaryota,38BRW@33154|Opisthokonta,3NVNP@4751|Fungi,3UZVJ@5204|Basidiomycota,3VD6A@5234|Tremellales	4751|Fungi	S	CHORD	NA	NA	NA	NA	CHORD,CS	OTHER	1	2e-06	NA	NA	NA	NA	NA	NA
119469	By MS/MS	By MS/MS	By matching	By MS/MS	By MS/MS	By MS/MS	15359000	21650000	16122000	32365000	220270000	220940000	5400800	6530300	4937100	3485400	11520000	14085000	82508.K1VKK6	5.53e-291	799	COG0334@1|root,KOG2250@2759|Eukaryota,38GEK@33154|Opisthokonta,3NVMC@4751|Fungi,3UYR6@5204|Basidiomycota,3VDP8@5234|Tremellales	4751|Fungi	E	Belongs to the Glu Leu Phe Val dehydrogenases family	GDH3	GO:0001505,GO:0003674,GO:0003824,GO:0004353,GO:0004354,GO:0005575,GO:0005576,GO:0005622,GO:0005623,GO:0005634,GO:0005737,GO:0005739,GO:0005829,GO:0006082,GO:0006520,GO:0006536,GO:0006537,GO:0006541,GO:0006807,GO:0008150,GO:0008152,GO:0008652,GO:0009058,GO:0009064,GO:0009084,GO:0009987,GO:0010033,GO:0016053,GO:0016491,GO:0016638,GO:0016639,GO:0017144,GO:0019676,GO:0019740,GO:0019752,GO:0030447,GO:…	ko:K00262	ko00220,ko00250,ko00910,ko01100,map00220,map00250,map00910,map01100	ELFV_dehydrog,ELFV_dehydrog_N	OTHER	1	0	NA	NA	NA	NA	NA	NA
121897	NA	NA	NA	NA	By MS/MS	NA	0	0	0	0	11733000	0	0	0	0	0	0	0	82508.K1VFZ5	2.41e-29	124	COG5641@1|root,KOG1601@2759|Eukaryota,3AAYE@33154|Opisthokonta,3P85Y@4751|Fungi,3V75X@5204|Basidiomycota,3VG17@5234|Tremellales	4751|Fungi	K	zinc finger binding to DNA consensus sequence [AT]GATA[AG]	NA	NA	NA	NA	GATA	OTHER	1	1e-06	NA	NA	NA	NA	NA	NA
122589	By MS/MS	By MS/MS	By MS/MS	By MS/MS	By MS/MS	By MS/MS	2237100000	1228700000	2142500000	3228400000	9318500000	10071000000	396750000	182590000	598980000	354210000	495510000	841170000	82508.K1VCZ9	1.53e-175	507	2CKE7@1|root,2RZ0M@2759|Eukaryota,3A0QR@33154|Opisthokonta,3P3H3@4751|Fungi,3V0I0@5204|Basidiomycota,3VFFX@5234|Tremellales	4751|Fungi	G	Alginate lyase	NA	NA	NA	NA	-	SP	0.0004	0.999557	CS pos: 19-20. Pr: 0.9677	PL	PL14	PL14_3	NA	NA
127698	By MS/MS	By MS/MS	By MS/MS	By MS/MS	By MS/MS	By MS/MS	805280	18289000	9895700	13965000	19228000	11072000	0	0	0	0	2064100	1223300	82508.K1VIG1	0	1006	COG1028@1|root,KOG3677@1|root,KOG1208@2759|Eukaryota,KOG3677@2759|Eukaryota,38IDV@33154|Opisthokonta,3NV6Y@4751|Fungi,3UY6Z@5204|Basidiomycota,3VD2P@5234|Tremellales	4751|Fungi	J	component of the eukaryotic translation initiation factor 3 (eIF-3) complex, which is involved in protein synthesis of a specialized repertoire of mRNAs and, together with other initiation factors, stimulates binding of mRNA and methionyl-tRNAi to the 40S ribosome. The eIF-3 complex specifically targets and initiates translation of a subset of mRNAs involved in cell proliferation	NA	GO:0003674,GO:0003676,GO:0003723,GO:0003743,GO:0005488,GO:0005575,GO:0005622,GO:0005623,GO:0005737,GO:0005852,GO:0006412,GO:0006413,GO:0006518,GO:0006807,GO:0008135,GO:0008150,GO:0008152,GO:0009058,GO:0009059,GO:0009987,GO:0010467,GO:0019538,GO:0032991,GO:0034641,GO:0034645,GO:0043043,GO:0043170,GO:0043603,GO:0043604,GO:0044237,GO:0044238,GO:0044249,GO:0044260,GO:0044267,GO:0044271,GO:0044424,GO:…	ko:K15029	NA	Paf67	OTHER	1	0	NA	NA	NA	NA	NA	NA
129235	By MS/MS	By MS/MS	By MS/MS	By MS/MS	By MS/MS	By MS/MS	20386000	35475000	18280000	21664000	37235000	16612000	13996000	13006000	12441000	6868400	4820400	0	5217.XP_007000898.1	3.03e-76	242	KOG4142@1|root,KOG4142@2759|Eukaryota,39SFQ@33154|Opisthokonta,3NVA9@4751|Fungi,3V0HA@5204|Basidiomycota,3VGPV@5234|Tremellales	4751|Fungi	I	Catalyzes the second two steps of the methylation pathway of phosphatidylcholine biosynthesis, the SAM-dependent methylation of phosphatidylmonomethylethanolamine (PMME) to phosphatidyldimethylethanolamine (PDME) and of PDME to phosphatidylcholine (PC)	OPI3	GO:0000003,GO:0000773,GO:0000909,GO:0003006,GO:0003674,GO:0003824,GO:0005575,GO:0005622,GO:0005623,GO:0005737,GO:0005739,GO:0005783,GO:0006629,GO:0006644,GO:0006650,GO:0006656,GO:0006793,GO:0006796,GO:0006807,GO:0007275,GO:0008150,GO:0008152,GO:0008168,GO:0008170,GO:0008610,GO:0008654,GO:0008757,GO:0009058,GO:0009987,GO:0012505,GO:0016020,GO:0016021,GO:0016740,GO:0016741,GO:0019637,GO:0019953,GO:…	ko:K00551	ko00564,ko01100,ko01110,map00564,map01100,map01110	PEMT	OTHER	0.999832	0.000174	NA	NA	NA	NA	NA	NA
130327	NA	By matching	NA	By matching	By MS/MS	NA	0	2198800	0	3064500	6335300	0	0	0	0	0	0	0	82508.K1V9X1	8.91e-298	860	KOG3743@1|root,KOG3743@2759|Eukaryota,38B47@33154|Opisthokonta,3NYMC@4751|Fungi,3UZV5@5204|Basidiomycota,3VEN6@5234|Tremellales	4751|Fungi	K	LAG1, DNA binding	NA	GO:0000228,GO:0000785,GO:0000790,GO:0000976,GO:0000977,GO:0000978,GO:0000981,GO:0000982,GO:0000987,GO:0001012,GO:0001067,GO:0001077,GO:0001228,GO:0003674,GO:0003676,GO:0003677,GO:0003690,GO:0003700,GO:0005488,GO:0005575,GO:0005622,GO:0005623,GO:0005634,GO:0005694,GO:0006139,GO:0006351,GO:0006355,GO:0006357,GO:0006366,GO:0006725,GO:0006807,GO:0008150,GO:0008152,GO:0009058,GO:0009059,GO:0009889,GO:…	ko:K06053	ko04330,ko04658,ko05165,ko05169,ko05203,map04330,map04658,map05165,map05169,map05203	BTD,LAG1-DNAbind,TIG	OTHER	1	0	NA	NA	NA	NA	NA	NA
131000	By MS/MS	By MS/MS	By MS/MS	By MS/MS	By MS/MS	By MS/MS	886710000	1930200000	782470000	1412600000	3213900000	1974500000	101230000	133950000	99364000	108780000	81548000	65959000	82508.K1WFZ6	0	1995	COG0045@1|root,KOG1254@2759|Eukaryota,38CW6@33154|Opisthokonta,3NU5J@4751|Fungi,3UYZC@5204|Basidiomycota,3VED0@5234|Tremellales	4751|Fungi	C	ATP citrate lyase citrate-binding	acl1	GO:0003674,GO:0003824,GO:0003878,GO:0005575,GO:0005622,GO:0005623,GO:0005737,GO:0005829,GO:0006082,GO:0006084,GO:0006085,GO:0006091,GO:0006101,GO:0006139,GO:0006163,GO:0006164,GO:0006629,GO:0006631,GO:0006633,GO:0006637,GO:0006725,GO:0006732,GO:0006753,GO:0006790,GO:0006793,GO:0006796,GO:0006807,GO:0008150,GO:0008152,GO:0008610,GO:0009058,GO:0009108,GO:0009117,GO:0009150,GO:0009152,GO:0009165,GO:…	ko:K01648	ko00020,ko00720,ko01100,ko01110,ko01120,ko01130,map00020,map00720,map01100,map01110,map01120,map01130	ATP-grasp_2,Citrate_bind,Citrate_synt,CoA_binding,Ligase_CoA	OTHER	1	0	NA	NA	NA	NA	NA	NA
137215	By matching	By matching	By matching	By MS/MS	By MS/MS	By MS/MS	12366000	21348000	5434900	13716000	43482000	21942000	7138200	7340200	0	0	5581800	5127500	82508.K1VJM2	0	1107	COG0532@1|root,KOG1144@2759|Eukaryota,38DE9@33154|Opisthokonta,3NX6J@4751|Fungi,3UYBW@5204|Basidiomycota,3VDW1@5234|Tremellales	4751|Fungi	J	Translation-initiation factor 2	FUN12	GO:0000166,GO:0000462,GO:0001732,GO:0001882,GO:0001883,GO:0002181,GO:0002183,GO:0003674,GO:0003676,GO:0003723,GO:0003743,GO:0003824,GO:0003924,GO:0005488,GO:0005515,GO:0005525,GO:0005575,GO:0005622,GO:0005623,GO:0005737,GO:0005739,GO:0005829,GO:0005840,GO:0006139,GO:0006364,GO:0006396,GO:0006412,GO:0006413,GO:0006417,GO:0006446,GO:0006518,GO:0006725,GO:0006807,GO:0006996,GO:0008135,GO:0008150,GO:…	ko:K03243	ko03013,map03013	GTP_EFTU,GTP_EFTU_D2,IF-2	OTHER	1	0	NA	NA	NA	NA	NA	NA
138967	By MS/MS	By MS/MS	By MS/MS	By MS/MS	By MS/MS	By MS/MS	1364800000	650020000	672510000	422860000	3371900000	4930200000	401130000	112650000	201800000	27621000	231960000	479900000	5207.AAW43671	3.94e-120	358	2CNFH@1|root,2QVX2@2759|Eukaryota,39RWS@33154|Opisthokonta,3P0ZX@4751|Fungi,3VCBR@5204|Basidiomycota,3VCME@5234|Tremellales	4751|Fungi	-	-	NA	NA	NA	NA	-	SP	0.000209	0.999759	CS pos: 19-20. Pr: 0.9802	NA	NA	NA	NA	NA
139082	NA	By MS/MS	NA	By MS/MS	By MS/MS	By matching	0	5002900	0	7791900	11604000	3303600	0	0	0	0	0	0	82508.K1W5F5	0	2498	COG0086@1|root,KOG0260@2759|Eukaryota,38CEW@33154|Opisthokonta,3NWQ7@4751|Fungi,3UYEK@5204|Basidiomycota,3VDRG@5234|Tremellales	4751|Fungi	K	DNA-dependent RNA polymerase catalyzes the transcription of DNA into RNA using the four ribonucleoside triphosphates as substrates	RPO21	GO:0000228,GO:0000428,GO:0000731,GO:0000785,GO:0000790,GO:0003674,GO:0003676,GO:0003677,GO:0005488,GO:0005575,GO:0005622,GO:0005623,GO:0005634,GO:0005654,GO:0005665,GO:0005694,GO:0005737,GO:0005739,GO:0006139,GO:0006259,GO:0006281,GO:0006301,GO:0006351,GO:0006366,GO:0006725,GO:0006807,GO:0006950,GO:0006974,GO:0008150,GO:0008152,GO:0009058,GO:0009059,GO:0009987,GO:0010467,GO:0010494,GO:0016070,GO:…	ko:K03006	ko00230,ko00240,ko01100,ko03020,ko05016,ko05168,ko05169,map00230,map00240,map01100,map03020,map05016,map05168,map05169	RNA_pol_Rpb1_1,RNA_pol_Rpb1_2,RNA_pol_Rpb1_3,RNA_pol_Rpb1_4,RNA_pol_Rpb1_5,RNA_pol_Rpb1_6,RNA_pol_Rpb1_7,RNA_pol_Rpb1_R	OTHER	1	0	NA	NA	NA	NA	NA	NA
139103	NA	By MS/MS	NA	By matching	By MS/MS	By MS/MS	0	1326200	0	8863600	9295900	3640800	0	0	0	0	0	0	82508.K1W6S4	2.86e-95	309	COG2453@1|root,KOG1716@2759|Eukaryota,38DF8@33154|Opisthokonta,3NVXN@4751|Fungi,3UZUR@5204|Basidiomycota,3VE3U@5234|Tremellales	4751|Fungi	V	Dual specificity phosphatase, catalytic domain	YVH1	GO:0000003,GO:0000027,GO:0003006,GO:0003674,GO:0003824,GO:0004721,GO:0004725,GO:0005575,GO:0005622,GO:0005623,GO:0005634,GO:0005737,GO:0006464,GO:0006470,GO:0006793,GO:0006796,GO:0006807,GO:0006996,GO:0007049,GO:0007154,GO:0007165,GO:0008138,GO:0008150,GO:0008152,GO:0009272,GO:0009653,GO:0009893,GO:0009894,GO:0009896,GO:0009987,GO:0010494,GO:0010506,GO:0010508,GO:0010638,GO:0010927,GO:0016043,GO:…	ko:K14819	NA	DSPc	OTHER	1	0	NA	NA	NA	NA	NA	NA
139383	By matching	By MS/MS	By matching	By matching	By MS/MS	By MS/MS	6476200	21156000	11279000	14679000	49839000	26781000	0	8137300	6049900	0	5517800	5006000	82508.K1W6R4	3.17e-108	329	COG0197@1|root,KOG2160@2759|Eukaryota,3A238@33154|Opisthokonta,3P2S3@4751|Fungi,3V13I@5204|Basidiomycota,3VF3J@5234|Tremellales	4751|Fungi	J	Nucleotide exchange factor Fes1	FES1	GO:0000166,GO:0000774,GO:0002181,GO:0003674,GO:0005488,GO:0005575,GO:0005622,GO:0005623,GO:0005737,GO:0005829,GO:0005840,GO:0006412,GO:0006508,GO:0006511,GO:0006515,GO:0006518,GO:0006807,GO:0006950,GO:0008150,GO:0008152,GO:0009056,GO:0009057,GO:0009058,GO:0009059,GO:0009987,GO:0010033,GO:0010467,GO:0010498,GO:0017076,GO:0019538,GO:0019941,GO:0022626,GO:0030163,GO:0030234,GO:0030554,GO:0032991,GO:…	NA	NA	Fes1,HEAT_2,HEAT_EZ	OTHER	1	0	NA	NA	NA	NA	NA	NA
139620	By matching	By MS/MS	By MS/MS	By MS/MS	By MS/MS	By MS/MS	2467900	18099000	4068200	13217000	56020000	49281000	0	4518800	0	4024000	4838700	5120500	82508.K1WXY6	1.93e-156	446	KOG1682@1|root,KOG1682@2759|Eukaryota,39M8G@33154|Opisthokonta,3P1BI@4751|Fungi	4751|Fungi	I	Belongs to the enoyl-CoA hydratase isomerase family	NA	NA	NA	NA	ECH_1	OTHER	1	0	NA	NA	NA	NA	NA	NA
140017	By MS/MS	By MS/MS	By MS/MS	NA	By MS/MS	By MS/MS	5506600	4866200	4058600	0	6008300	9977600	0	0	0	0	0	0	5217.XP_007003353.1	2.2e-274	774	KOG2458@1|root,KOG2458@2759|Eukaryota,38VVB@33154|Opisthokonta,3NZRH@4751|Fungi,3UYZY@5204|Basidiomycota,3VEP8@5234|Tremellales	4751|Fungi	S	Putative lipopolysaccharide-modifying enzyme.	NA	GO:0000271,GO:0003674,GO:0003824,GO:0005575,GO:0005623,GO:0005975,GO:0005976,GO:0006629,GO:0006643,GO:0006664,GO:0006665,GO:0006687,GO:0006688,GO:0006807,GO:0008150,GO:0008152,GO:0008194,GO:0008610,GO:0009058,GO:0009059,GO:0009247,GO:0009405,GO:0009987,GO:0012505,GO:0016043,GO:0016051,GO:0016740,GO:0016757,GO:0016758,GO:0016763,GO:0030148,GO:0033692,GO:0034637,GO:0034645,GO:0035252,GO:0042285,GO:…	ko:K11702	NA	Glyco_transf_90	OTHER	0.999963	7.1e-05	NA	GT	GT90	NA	GT90:15.1	GT90*16
143427	By matching	By MS/MS	By MS/MS	By MS/MS	By MS/MS	By MS/MS	5859900	8609600	3634700	14691000	120920000	30504000	5695100	0	0	0	17626000	7426400	552467.XP_003192418.1	1.34e-152	446	KOG2785@1|root,KOG2785@2759|Eukaryota,38CWN@33154|Opisthokonta,3NX8I@4751|Fungi,3UZ9T@5204|Basidiomycota,3VE6E@5234|Tremellales	4751|Fungi	S	C2H2 type zinc-finger (2 copies)	REI1	GO:0000003,GO:0000278,GO:0003674,GO:0003676,GO:0003677,GO:0005488,GO:0005575,GO:0005622,GO:0005623,GO:0005737,GO:0005829,GO:0005840,GO:0006810,GO:0006913,GO:0007049,GO:0007114,GO:0007117,GO:0008150,GO:0009987,GO:0015934,GO:0019954,GO:0022414,GO:0022613,GO:0022625,GO:0022626,GO:0030684,GO:0030687,GO:0032505,GO:0032991,GO:0040007,GO:0042254,GO:0042273,GO:0043226,GO:0043228,GO:0043229,GO:0043232,GO:…	ko:K14816	NA	zf-C2H2_2,zf-C2H2_jaz,zf-met	OTHER	1	1.7e-05	NA	NA	NA	NA	NA	NA
144271	By MS/MS	By MS/MS	By MS/MS	By MS/MS	By MS/MS	By MS/MS	3717100	9576200	2800900	99282000	324750000	134660000	1737800	1669400	1642800	34289000	55000000	11293000	82508.K1VNK8	2.14e-24	98.6	2FHVK@1|root,2TJ9A@2759|Eukaryota,3AXXF@33154|Opisthokonta,3PJ2N@4751|Fungi,3V8BW@5204|Basidiomycota,3VHBV@5234|Tremellales	4751|Fungi	-	-	NA	NA	NA	NA	-	OTHER	1	0	NA	NA	NA	NA	NA	NA
148399	By MS/MS	By MS/MS	By MS/MS	By MS/MS	By MS/MS	By MS/MS	16089000	10852000	11953000	25799000	45639000	52646000	7422700	6228900	7238800	14380000	9845900	10214000	5217.XP_007006033.1	2.02e-41	151	COG1881@1|root,KOG3346@2759|Eukaryota,3A5CI@33154|Opisthokonta,3P3ZA@4751|Fungi,3V1S4@5204|Basidiomycota,3VFZ2@5234|Tremellales	4751|Fungi	S	Phosphatidylethanolamine-binding protein	NA	NA	NA	NA	PBP	SP	0.001966	0.998013	CS pos: 13-14. Pr: 0.9714	NA	NA	NA	NA	NA
149213	By matching	By matching	By matching	By matching	By MS/MS	By MS/MS	1349600	3725100	1117000	3908500	8882100	8775400	0	0	0	0	0	0	5207.AAW42703	1.37e-96	287	COG0125@1|root,KOG3327@2759|Eukaryota,39U2H@33154|Opisthokonta,3P2YY@4751|Fungi,3V0X5@5204|Basidiomycota,3VESA@5234|Tremellales	4751|Fungi	F	Thymidylate kinase	CDC8	GO:0003674,GO:0003824,GO:0004550,GO:0004798,GO:0005575,GO:0005622,GO:0005623,GO:0005634,GO:0005737,GO:0006139,GO:0006165,GO:0006220,GO:0006221,GO:0006227,GO:0006233,GO:0006235,GO:0006725,GO:0006753,GO:0006793,GO:0006796,GO:0006807,GO:0008150,GO:0008152,GO:0009041,GO:0009058,GO:0009117,GO:0009123,GO:0009132,GO:0009133,GO:0009138,GO:0009139,GO:0009141,GO:0009142,GO:0009147,GO:0009148,GO:0009165,GO:…	ko:K00943	ko00240,ko01100,map00240,map01100	Thymidylate_kin	OTHER	1	3.8e-05	NA	NA	NA	NA	NA	NA
150022	By MS/MS	By MS/MS	By MS/MS	By MS/MS	By MS/MS	By MS/MS	29583000	69602000	31822000	48719000	109020000	69248000	9210000	12496000	8932000	8609200	6603600	5527600	82508.K1V2Z7	9.81e-225	623	KOG1164@1|root,KOG1164@2759|Eukaryota,38BQ1@33154|Opisthokonta,3NUPD@4751|Fungi,3UYWD@5204|Basidiomycota,3VE8B@5234|Tremellales	4751|Fungi	T	Protein tyrosine kinase	HRR25	GO:0000003,GO:0000045,GO:0000280,GO:0000407,GO:0000775,GO:0000776,GO:0000777,GO:0000779,GO:0000793,GO:0002097,GO:0002098,GO:0003674,GO:0003824,GO:0004672,GO:0004674,GO:0004713,GO:0005575,GO:0005622,GO:0005623,GO:0005634,GO:0005694,GO:0005737,GO:0005794,GO:0005815,GO:0005816,GO:0005829,GO:0005856,GO:0005886,GO:0005933,GO:0005934,GO:0005935,GO:0006139,GO:0006259,GO:0006281,GO:0006396,GO:0006399,GO:…	ko:K14758	ko03008,map03008	Pkinase	OTHER	1	0	NA	NA	NA	NA	NA	NA
152075	By MS/MS	By MS/MS	By MS/MS	By MS/MS	By MS/MS	By MS/MS	397330000	1221600000	424220000	1227700000	794240000	573250000	212610000	389090000	283210000	238620000	445390000	382290000	82508.K1VEW5	3.13e-166	469	COG0052@1|root,KOG0830@2759|Eukaryota,38E10@33154|Opisthokonta,3NUJI@4751|Fungi,3UZNG@5204|Basidiomycota,3VEJJ@5234|Tremellales	4751|Fungi	J	Required for the assembly and or stability of the 40S ribosomal subunit. Required for the processing of the 20S rRNA- precursor to mature 18S rRNA in a late step of the maturation of 40S ribosomal subunits	RPS0	GO:0000028,GO:0000447,GO:0000460,GO:0000461,GO:0000462,GO:0000466,GO:0000469,GO:0000478,GO:0000479,GO:0002181,GO:0003674,GO:0003735,GO:0005198,GO:0005575,GO:0005622,GO:0005623,GO:0005737,GO:0005829,GO:0005840,GO:0006139,GO:0006364,GO:0006396,GO:0006403,GO:0006405,GO:0006407,GO:0006412,GO:0006518,GO:0006611,GO:0006725,GO:0006807,GO:0006810,GO:0006886,GO:0006913,GO:0006996,GO:0008104,GO:0008150,GO:…	ko:K02998	ko03010,map03010	40S_SA_C,Ribosomal_S2	OTHER	1	0	NA	NA	NA	NA	NA	NA
152859	NA	By MS/MS	NA	NA	NA	NA	0	6030300	0	0	0	0	0	0	0	0	0	0	405948.SACE_6523	2.19e-159	464	COG1304@1|root,COG1304@2|Bacteria,2GJA5@201174|Actinobacteria,4DYM9@85010|Pseudonocardiales	201174|Actinobacteria	C	Alpha-hydroxyacid dehydrogenase, FMN-dependent L-lactate dehydrogenase	NA	NA	ko:K00101,ko:K00467	ko00620,ko01100,map00620,map01100	FMN_dh	OTHER	1	2e-06	NA	NA	NA	NA	NA	NA
153424	By MS/MS	By MS/MS	By MS/MS	By MS/MS	By MS/MS	By MS/MS	277310000	527490000	254350000	380280000	771520000	665980000	54910000	65823000	48481000	35530000	39402000	41233000	82508.K1VHK5	2.17e-269	749	COG0364@1|root,KOG0563@2759|Eukaryota,38E2A@33154|Opisthokonta,3NWH9@4751|Fungi,3UYTU@5204|Basidiomycota,3VDV8@5234|Tremellales	4751|Fungi	G	Catalyzes the rate-limiting step of the oxidative pentose-phosphate pathway, which represents a route for the dissimilation of carbohydrates besides glycolysis	ZWF1	GO:0000166,GO:0000302,GO:0002262,GO:0002376,GO:0002520,GO:0003674,GO:0003824,GO:0004345,GO:0005488,GO:0005515,GO:0005536,GO:0005575,GO:0005622,GO:0005623,GO:0005737,GO:0005829,GO:0005886,GO:0005975,GO:0005996,GO:0006066,GO:0006081,GO:0006091,GO:0006098,GO:0006139,GO:0006518,GO:0006575,GO:0006629,GO:0006694,GO:0006695,GO:0006725,GO:0006732,GO:0006733,GO:0006739,GO:0006740,GO:0006749,GO:0006753,GO:…	ko:K00036	ko00030,ko00480,ko01100,ko01110,ko01120,ko01130,ko01200,ko05230,map00030,map00480,map01100,map01110,map01120,map01130,map01200,map05230	G6PD_C,G6PD_N	OTHER	1	0	NA	NA	NA	NA	NA	NA
154297	NA	NA	NA	By MS/MS	By MS/MS	NA	0	0	0	7059200	6063100	0	0	0	0	0	0	0	82508.K1VTJ3	6.04e-187	560	2CXX3@1|root,2S0D7@2759|Eukaryota	2759|Eukaryota	K	Fungal specific transcription factor domain	NA	NA	NA	NA	Fungal_trans,Zn_clus	OTHER	1	1e-06	NA	NA	NA	NA	NA	NA
155185	NA	By MS/MS	NA	NA	By MS/MS	By MS/MS	0	0	0	0	0	0	0	0	0	0	0	0	5217.XP_007004155.1	5.65e-82	259	KOG2435@1|root,KOG2435@2759|Eukaryota,39UTK@33154|Opisthokonta,3P3P4@4751|Fungi,3V25E@5204|Basidiomycota,3VF33@5234|Tremellales	4751|Fungi	S	Complex I intermediate-associated protein 30 (CIA30)	NA	GO:0003674,GO:0005488,GO:0005515,GO:0005575,GO:0005622,GO:0005623,GO:0005737,GO:0005739,GO:0005740,GO:0005743,GO:0005746,GO:0005747,GO:0006091,GO:0006119,GO:0006120,GO:0006139,GO:0006163,GO:0006725,GO:0006753,GO:0006793,GO:0006796,GO:0006807,GO:0008150,GO:0008152,GO:0009117,GO:0009123,GO:0009126,GO:0009141,GO:0009144,GO:0009150,GO:0009161,GO:0009167,GO:0009199,GO:0009205,GO:0009259,GO:0009987,GO:…	ko:K18159	ko04714,map04714	CIA30	OTHER	0.999981	6.4e-05	NA	NA	NA	NA	NA	NA
155635	By MS/MS	By MS/MS	By matching	By MS/MS	By MS/MS	By MS/MS	5289000	14810000	8596800	25497000	52945000	13569000	0	6078700	4588900	5318200	4334100	2825300	82508.K1VGE5	6.74e-101	301	KOG4186@1|root,KOG4186@2759|Eukaryota,38B7Q@33154|Opisthokonta,3NWIA@4751|Fungi,3V0HY@5204|Basidiomycota,3VF68@5234|Tremellales	4751|Fungi	U	peroxisome organization and biogenesis-related protein	PEX11	GO:0005575,GO:0005622,GO:0005623,GO:0005737,GO:0005777,GO:0005778,GO:0005783,GO:0006082,GO:0006629,GO:0006631,GO:0006996,GO:0007031,GO:0008150,GO:0008152,GO:0009987,GO:0012505,GO:0016020,GO:0016043,GO:0016559,GO:0019395,GO:0019752,GO:0030258,GO:0031090,GO:0031903,GO:0032535,GO:0032787,GO:0032991,GO:0034440,GO:0042579,GO:0043226,GO:0043227,GO:0043229,GO:0043231,GO:0043436,GO:0044237,GO:0044238,GO:…	ko:K13352	ko04146,map04146	PEX11	OTHER	1	0	NA	NA	NA	NA	NA	NA
156110	By MS/MS	By MS/MS	By MS/MS	By MS/MS	By MS/MS	By MS/MS	392550000	344270000	436040000	312100000	616460000	598880000	70430000	34115000	74173000	30785000	21179000	30880000	82508.K1W368	0	886	COG2986@1|root,KOG0222@2759|Eukaryota,39FQ6@33154|Opisthokonta,3NX1Q@4751|Fungi,3UY9H@5204|Basidiomycota	4751|Fungi	Q	Phenylalanine ammonia-lyase	NA	NA	ko:K10775	ko00360,ko00940,ko01100,ko01110,map00360,map00940,map01100,map01110	Lyase_aromatic	OTHER	1	2e-06	NA	NA	NA	NA	NA	NA
158302	By MS/MS	By MS/MS	By MS/MS	By MS/MS	By MS/MS	By MS/MS	86652000	158860000	68794000	132340000	303330000	215470000	14953000	16338000	15839000	11801000	11584000	11823000	82508.K1VQI4	0	1353	KOG0276@1|root,KOG0276@2759|Eukaryota,38EBC@33154|Opisthokonta,3NWHK@4751|Fungi,3UYE5@5204|Basidiomycota,3VEAC@5234|Tremellales	4751|Fungi	U	The coatomer is a cytosolic protein complex that binds to dilysine motifs and reversibly associates with Golgi non- clathrin-coated vesicles, which further mediate biosynthetic protein transport from the ER, via the Golgi up to the trans Golgi network. Coatomer complex is required for budding from Golgi membranes, and is essential for the retrograde Golgi-to-ER transport of dilysine-tagged protei…	SEC27	GO:0003674,GO:0005488,GO:0005515,GO:0005575,GO:0005622,GO:0005623,GO:0005737,GO:0005794,GO:0005798,GO:0006810,GO:0006886,GO:0006888,GO:0006890,GO:0006891,GO:0007034,GO:0008104,GO:0008150,GO:0012505,GO:0012506,GO:0015031,GO:0015833,GO:0016020,GO:0016192,GO:0016197,GO:0030117,GO:0030120,GO:0030126,GO:0030135,GO:0030137,GO:0030659,GO:0030660,GO:0030662,GO:0030663,GO:0031090,GO:0031410,GO:0031982,GO:…	ko:K17302	NA	Coatomer_WDAD,WD40	OTHER	1	0	NA	NA	NA	NA	NA	NA
158739	By matching	By matching	By matching	NA	By MS/MS	NA	7236400	28498000	4693500	0	43204000	0	0	0	0	0	0	0	82508.K1WPC5	3.92e-135	409	KOG1414@1|root,KOG1414@2759|Eukaryota,39QGM@33154|Opisthokonta,3NVG8@4751|Fungi,3V17G@5204|Basidiomycota,3VE97@5234|Tremellales	4751|Fungi	K	Aft1 HRA domain	SKO1	GO:0000003,GO:0000018,GO:0000122,GO:0000165,GO:0000228,GO:0000280,GO:0000785,GO:0000790,GO:0000976,GO:0000977,GO:0000978,GO:0000981,GO:0000982,GO:0000987,GO:0000988,GO:0000989,GO:0001012,GO:0001067,GO:0001076,GO:0001077,GO:0001078,GO:0001085,GO:0001103,GO:0001191,GO:0001227,GO:0001228,GO:0003674,GO:0003676,GO:0003677,GO:0003690,GO:0003700,GO:0003723,GO:0005488,GO:0005515,GO:0005575,GO:0005622,GO:…	ko:K09051	ko04011,map04011	Aft1_HRA,Aft1_HRR,Aft1_OSA,bZIP_1	OTHER	1	0	NA	NA	NA	NA	NA	NA
159179	By MS/MS	By MS/MS	By MS/MS	By matching	By MS/MS	By MS/MS	17918000	11367000	10561000	4410300	13382000	8594800	6138800	3053000	5153100	0	3321900	3895800	82508.K1WMC9	8.97e-287	790	COG3425@1|root,KOG1393@2759|Eukaryota,38BNA@33154|Opisthokonta,3NUD4@4751|Fungi,3UYF1@5204|Basidiomycota,3VCSV@5234|Tremellales	4751|Fungi	I	This enzyme condenses acetyl-CoA with acetoacetyl-CoA to form HMG-CoA, which is the substrate for HMG-CoA reductase	ERG13	GO:0003674,GO:0003824,GO:0004421,GO:0005575,GO:0005622,GO:0005623,GO:0005634,GO:0005737,GO:0005783,GO:0006066,GO:0006084,GO:0006139,GO:0006163,GO:0006629,GO:0006637,GO:0006644,GO:0006694,GO:0006696,GO:0006720,GO:0006721,GO:0006725,GO:0006732,GO:0006753,GO:0006790,GO:0006793,GO:0006796,GO:0006807,GO:0008150,GO:0008152,GO:0008202,GO:0008204,GO:0008299,GO:0008610,GO:0008654,GO:0009058,GO:0009117,GO:…	ko:K01641	ko00072,ko00280,ko00650,ko00900,ko01100,ko01110,ko01130,map00072,map00280,map00650,map00900,map01100,map01110,map01130	HMG_CoA_synt_C,HMG_CoA_synt_N	OTHER	0.999876	0.000156	NA	NA	NA	NA	NA	NA
160277	NA	By MS/MS	By MS/MS	By MS/MS	By MS/MS	By MS/MS	0	36092000	5701100	29687000	40623000	11360000	0	8359600	3693300	7784800	3680600	2276000	NA	NA	NA	NA	NA	NA	NA	NA	NA	NA	NA	NA	OTHER	0.999859	0.000151	NA	NA	NA	NA	NA	NA
160407	By MS/MS	By MS/MS	By MS/MS	By MS/MS	By MS/MS	By MS/MS	13500000	38302000	17977000	84509000	111730000	28658000	0	0	0	0	0	0	NA	NA	NA	NA	NA	NA	NA	NA	NA	NA	NA	NA	OTHER	1	0	NA	NA	NA	NA	NA	NA
160413	By MS/MS	By MS/MS	By MS/MS	By MS/MS	By MS/MS	By MS/MS	26354000	134650000	50101000	131300000	310080000	147570000	10451000	23831000	16785000	27080000	15680000	15784000	NA	NA	NA	NA	NA	NA	NA	NA	NA	NA	NA	NA	OTHER	1	0	NA	NA	NA	NA	NA	NA
161353	By MS/MS	By MS/MS	By MS/MS	By MS/MS	By MS/MS	By MS/MS	18419000	41908000	13098000	27473000	99005000	106300000	8382900	11247000	6108900	4210600	7719700	11905000	82508.K1W9X1	2.67e-197	557	COG3407@1|root,KOG2833@2759|Eukaryota,38DKK@33154|Opisthokonta,3NW3F@4751|Fungi,3UYB0@5204|Basidiomycota,3VEK6@5234|Tremellales	4751|Fungi	I	diphosphomevalonate decarboxylase	MVD1	GO:0003674,GO:0003824,GO:0004163,GO:0005575,GO:0005622,GO:0005623,GO:0005737,GO:0005829,GO:0006066,GO:0006084,GO:0006139,GO:0006163,GO:0006629,GO:0006637,GO:0006644,GO:0006694,GO:0006696,GO:0006720,GO:0006725,GO:0006732,GO:0006753,GO:0006790,GO:0006793,GO:0006796,GO:0006807,GO:0008150,GO:0008152,GO:0008202,GO:0008204,GO:0008299,GO:0008610,GO:0008654,GO:0009058,GO:0009117,GO:0009150,GO:0009240,GO:…	ko:K01597	ko00900,ko01100,ko01110,ko01130,map00900,map01100,map01110,map01130	GHMP_kinases_N	OTHER	1	1e-06	NA	NA	NA	NA	NA	NA
162687	By MS/MS	By MS/MS	By MS/MS	By MS/MS	By MS/MS	By MS/MS	22175000	62747000	22886000	24747000	63556000	63700000	5925100	8096100	6623300	4515700	5321500	5141100	82508.K1VHF0	1.02e-259	719	COG1222@1|root,KOG0727@2759|Eukaryota,39J9B@33154|Opisthokonta,3NUMF@4751|Fungi,3UXU3@5204|Basidiomycota,3VCT4@5234|Tremellales	4751|Fungi	O	Belongs to the AAA ATPase family	RPT3	GO:0000228,GO:0000502,GO:0000785,GO:0000790,GO:0003674,GO:0003824,GO:0005488,GO:0005515,GO:0005575,GO:0005622,GO:0005623,GO:0005634,GO:0005694,GO:0005737,GO:0005829,GO:0005838,GO:0006325,GO:0006355,GO:0006357,GO:0006508,GO:0006511,GO:0006807,GO:0006950,GO:0006996,GO:0007088,GO:0007346,GO:0008134,GO:0008150,GO:0008152,GO:0008540,GO:0009056,GO:0009057,GO:0009889,GO:0009891,GO:0009893,GO:0009894,GO:…	ko:K03063	ko03050,ko05169,map03050,map05169	AAA	OTHER	1	0	NA	NA	NA	NA	NA	NA
163577	NA	By MS/MS	NA	NA	NA	NA	0	10075000	0	0	0	0	0	0	0	0	0	0	82508.K1WWS9	1.77e-199	579	COG0318@1|root,KOG1176@2759|Eukaryota,3AIZB@33154|Opisthokonta,3Q511@4751|Fungi,3VCHN@5204|Basidiomycota,3VETR@5234|Tremellales	4751|Fungi	I	AMP-binding enzyme	NA	NA	NA	NA	AMP-binding,AMP-binding_C	OTHER	1	0	NA	NA	NA	NA	NA	NA
164578	By MS/MS	By MS/MS	By MS/MS	By MS/MS	By MS/MS	By MS/MS	440040000	733000000	392750000	301720000	1657900000	1547000000	126660000	171420000	133720000	39281000	92579000	132610000	5207.AAW41724	6.05e-81	252	COG0655@1|root,KOG3135@2759|Eukaryota,38HWI@33154|Opisthokonta,3NU10@4751|Fungi,3V0Q4@5204|Basidiomycota,3VF7N@5234|Tremellales	4751|Fungi	S	NADPH-dependent FMN reductase	NA	GO:0000166,GO:0000785,GO:0000792,GO:0003674,GO:0003824,GO:0003955,GO:0005488,GO:0005575,GO:0005622,GO:0005623,GO:0005694,GO:0005737,GO:0005886,GO:0006325,GO:0006342,GO:0006355,GO:0006996,GO:0008150,GO:0008152,GO:0009889,GO:0009890,GO:0009892,GO:0009987,GO:0010181,GO:0010468,GO:0010556,GO:0010558,GO:0010605,GO:0010629,GO:0016020,GO:0016043,GO:0016458,GO:0016491,GO:0016651,GO:0016655,GO:0019219,GO:…	ko:K03809	ko00130,ko01110,map00130,map01110	FMN_red	OTHER	1	1e-06	NA	AA	AA6	NA	AA6:3.3	AA6*4
165652	By matching	By MS/MS	By matching	NA	By matching	NA	2131800	6649800	3974800	0	10055000	0	0	0	0	0	0	0	NA	NA	NA	NA	NA	NA	NA	NA	NA	NA	NA	NA	OTHER	0.999722	0.000272	NA	NA	NA	NA	NA	NA
166194	By MS/MS	By MS/MS	By MS/MS	By MS/MS	By MS/MS	By MS/MS	544360000	483840000	730610000	1019200000	2588800000	1399600000	204560000	137120000	280480000	157880000	286830000	187100000	82508.K1VH52	7.84e-164	460	COG0098@1|root,KOG0877@2759|Eukaryota,38F84@33154|Opisthokonta,3NWFC@4751|Fungi,3UY0G@5204|Basidiomycota,3VE0A@5234|Tremellales	4751|Fungi	J	Belongs to the universal ribosomal protein uS5 family	RPS2	GO:0002181,GO:0003674,GO:0003676,GO:0003723,GO:0003735,GO:0005198,GO:0005488,GO:0005575,GO:0005622,GO:0005623,GO:0005737,GO:0005829,GO:0005840,GO:0006403,GO:0006405,GO:0006407,GO:0006412,GO:0006417,GO:0006450,GO:0006518,GO:0006611,GO:0006807,GO:0006810,GO:0006886,GO:0006913,GO:0008104,GO:0008150,GO:0008152,GO:0009058,GO:0009059,GO:0009889,GO:0009891,GO:0009893,GO:0009987,GO:0010467,GO:0010468,GO:…	ko:K02981	ko03010,map03010	Ribosomal_S5,Ribosomal_S5_C	OTHER	1	0	NA	NA	NA	NA	NA	NA
167011	By MS/MS	By MS/MS	By MS/MS	By MS/MS	By MS/MS	By MS/MS	509050000	402470000	784680000	532660000	2330200000	3147700000	117270000	49402000	171780000	81201000	115470000	194740000	552467.XP_003197451.1	3.4e-83	256	COG0726@1|root,2S2CW@2759|Eukaryota,39Z6D@33154|Opisthokonta,3P1A4@4751|Fungi,3V0UV@5204|Basidiomycota,3VF0N@5234|Tremellales	4751|Fungi	O	Polysaccharide deacetylase	NA	NA	NA	NA	Polysacc_deac_1	SP	0.000192	0.999797	CS pos: 18-19. Pr: 0.9817	CE	CE4	NA	CE4:54.1	CE4*3
167893	By MS/MS	By MS/MS	By MS/MS	By matching	By MS/MS	By MS/MS	47883000	34678000	44357000	11673000	28728000	26918000	0	0	0	0	0	0	552467.XP_003193570.1	2.24e-51	169	2EN9E@1|root,2SRRV@2759|Eukaryota,3APH9@33154|Opisthokonta,3PEHZ@4751|Fungi,3V5R9@5204|Basidiomycota,3VFKV@5234|Tremellales	4751|Fungi	-	-	NA	NA	NA	NA	-	SP	0.000223	0.999762	CS pos: 15-16. Pr: 0.9801	NA	NA	NA	NA	NA
168470	NA	NA	NA	By MS/MS	By MS/MS	By matching	0	0	0	3146900	7167900	2608100	0	0	0	0	0	0	NA	NA	NA	NA	NA	NA	NA	NA	NA	NA	NA	NA	OTHER	1	3e-06	NA	NA	NA	NA	NA	NA
170810	By MS/MS	By MS/MS	By MS/MS	By MS/MS	By MS/MS	By MS/MS	27946000000	16491000000	25466000000	5225600000	15672000000	11989000000	10367000000	3756700000	9669600000	886530000	1510300000	1931600000	82508.K1V1B2	1.94e-117	356	COG0726@1|root,2QZU8@2759|Eukaryota,39V04@33154|Opisthokonta,3NZUV@4751|Fungi,3V06G@5204|Basidiomycota,3VEBE@5234|Tremellales	4751|Fungi	O	Polysaccharide deacetylase	NA	GO:0003674,GO:0003824,GO:0004099,GO:0005575,GO:0008150,GO:0009653,GO:0009987,GO:0010927,GO:0016020,GO:0016043,GO:0016787,GO:0016810,GO:0016811,GO:0019213,GO:0022607,GO:0030154,GO:0030435,GO:0032502,GO:0032989,GO:0042244,GO:0042546,GO:0043934,GO:0044085,GO:0045229,GO:0048646,GO:0048856,GO:0048869,GO:0070590,GO:0070726,GO:0071554,GO:0071555,GO:0071840	ko:K01452	ko00520,ko01100,map00520,map01100	Polysacc_deac_1	SP	0.000351	0.999643	CS pos: 15-16. Pr: 0.9742	CE	CE4	NA	CE4:27.1	CE4*8
170824	By MS/MS	By MS/MS	By MS/MS	By MS/MS	By MS/MS	By MS/MS	17544000	63119000	16886000	15148000	91176000	79927000	10245000	18127000	9907400	0	10589000	8955300	82508.K1VFQ1	2.79e-189	533	KOG2190@1|root,KOG2190@2759|Eukaryota,38G1X@33154|Opisthokonta,3NW5E@4751|Fungi,3UXYW@5204|Basidiomycota,3VCMC@5234|Tremellales	4751|Fungi	A	Pfam:KH_3	HEK2	GO:0000228,GO:0000723,GO:0000781,GO:0000784,GO:0000932,GO:0001932,GO:0001933,GO:0003674,GO:0003676,GO:0003723,GO:0003729,GO:0003730,GO:0005488,GO:0005575,GO:0005622,GO:0005623,GO:0005634,GO:0005694,GO:0005737,GO:0006139,GO:0006259,GO:0006278,GO:0006403,GO:0006725,GO:0006807,GO:0006996,GO:0007004,GO:0008150,GO:0008152,GO:0008298,GO:0009058,GO:0009059,GO:0009892,GO:0009893,GO:0009894,GO:0009895,GO:…	ko:K18738	NA	KH_1	OTHER	1	3e-06	NA	NA	NA	NA	NA	NA
171238	By MS/MS	By MS/MS	By MS/MS	By MS/MS	By MS/MS	By MS/MS	3344000	16981000	6453100	14436000	107500000	84681000	2715500	3344700	3238000	5658000	5130100	5476200	NA	NA	NA	NA	NA	NA	NA	NA	NA	NA	NA	NA	OTHER	1	0	NA	NA	NA	NA	NA	NA
171402	NA	By MS/MS	NA	NA	By MS/MS	NA	0	6219800	0	0	5388000	0	0	0	0	0	0	0	5346.XP_001833752.2	8.16e-15	70.5	2C2U9@1|root,2SBJR@2759|Eukaryota,3AC00@33154|Opisthokonta,3P8SM@4751|Fungi,3V2V7@5204|Basidiomycota,22B2S@155619|Agaricomycetes,3W849@5338|Agaricales	4751|Fungi	S	CBP4	NA	NA	NA	NA	CBP4	OTHER	1	6e-06	NA	NA	NA	NA	NA	NA
172812	NA	NA	NA	NA	By MS/MS	NA	0	0	0	0	0	0	0	0	0	0	0	0	5217.XP_007001779.1	5.57e-130	425	KOG1844@1|root,KOG1844@2759|Eukaryota,39TI7@33154|Opisthokonta,3NYTJ@4751|Fungi,3V1JY@5204|Basidiomycota,3VE6X@5234|Tremellales	4751|Fungi	S	Transcription factor binding protein	CTI6	GO:0000118,GO:0000228,GO:0000785,GO:0000790,GO:0003674,GO:0003824,GO:0005488,GO:0005515,GO:0005575,GO:0005622,GO:0005623,GO:0005634,GO:0005654,GO:0005694,GO:0005737,GO:0006275,GO:0006325,GO:0006338,GO:0006355,GO:0006357,GO:0006464,GO:0006476,GO:0006807,GO:0006996,GO:0008134,GO:0008150,GO:0008152,GO:0009889,GO:0009891,GO:0009893,GO:0009987,GO:0010468,GO:0010556,GO:0010557,GO:0010604,GO:0010628,GO:…	NA	NA	PHD	OTHER	1	0	NA	NA	NA	NA	NA	NA
174327	NA	NA	NA	NA	By matching	By MS/MS	0	0	0	0	6673800	9213400	0	0	0	0	0	0	82508.K1VML7	1.24e-66	213	COG0702@1|root,KOG1203@2759|Eukaryota,3A4ZW@33154|Opisthokonta,3P46B@4751|Fungi,3V1BC@5204|Basidiomycota,3VGXH@5234|Tremellales	4751|Fungi	G	NAD(P)H-binding	NA	GO:0005575,GO:0005622,GO:0005623,GO:0005737,GO:0044424,GO:0044464	NA	NA	NAD_binding_10	OTHER	1	0	NA	NA	NA	NA	NA	NA
176092	NA	NA	NA	NA	By MS/MS	By MS/MS	0	0	0	0	0	0	0	0	0	0	0	0	5217.XP_007000742.1	4.47e-127	377	2CIRP@1|root,2RITG@2759|Eukaryota,39ZHX@33154|Opisthokonta,3P0K2@4751|Fungi,3V4ST@5204|Basidiomycota,3VDEF@5234|Tremellales	4751|Fungi	S	IgA Peptidase M64	NA	NA	NA	NA	Peptidase_M64	OTHER	1	1.5e-05	NA	NA	NA	NA	NA	NA
177727	By MS/MS	By MS/MS	By MS/MS	By MS/MS	By MS/MS	By MS/MS	31990000	69800000	31098000	487040000	1603300000	688830000	17329000	14125000	8431000	65018000	91262000	47871000	5207.AAW44730	1.11e-53	178	KOG0533@1|root,KOG0533@2759|Eukaryota,39YV4@33154|Opisthokonta,3NXQF@4751|Fungi,3V1FZ@5204|Basidiomycota,3VFV0@5234|Tremellales	4751|Fungi	A	RNA recognition motif	YRA1	GO:0000346,GO:0003674,GO:0003676,GO:0003723,GO:0004857,GO:0005488,GO:0005575,GO:0005622,GO:0005623,GO:0005634,GO:0006139,GO:0006259,GO:0006281,GO:0006283,GO:0006289,GO:0006403,GO:0006405,GO:0006406,GO:0006611,GO:0006725,GO:0006807,GO:0006810,GO:0006886,GO:0006913,GO:0006950,GO:0006974,GO:0008104,GO:0008150,GO:0008152,GO:0009987,GO:0010467,GO:0015031,GO:0015833,GO:0015931,GO:0016973,GO:0030234,GO:…	ko:K12881	ko03013,ko03015,ko03040,ko05168,map03013,map03015,map03040,map05168	FoP_duplication,RRM_1	OTHER	1	0	NA	NA	NA	NA	NA	NA
178253	NA	NA	By MS/MS	By matching	By MS/MS	By matching	0	0	15245000	133500000	614360000	132530000	0	0	0	0	0	0	NA	NA	NA	NA	NA	NA	NA	NA	NA	NA	NA	NA	OTHER	1	1e-06	NA	NA	NA	NA	NA	NA
178422	By MS/MS	By MS/MS	By MS/MS	By MS/MS	By MS/MS	By MS/MS	123860000	309040000	95755000	257640000	419590000	269830000	25327000	35019000	18421000	32034000	23107000	16371000	552467.XP_003194226.1	4.71e-276	765	KOG3870@1|root,KOG3870@2759|Eukaryota,38G0A@33154|Opisthokonta,3NVVV@4751|Fungi,3UY9T@5204|Basidiomycota,3VE21@5234|Tremellales	4751|Fungi	S	Protein of unknown function DUF89	HRT2	GO:0003674,GO:0003824,GO:0005575,GO:0005622,GO:0005623,GO:0005634,GO:0005737,GO:0006793,GO:0006796,GO:0008150,GO:0008152,GO:0009636,GO:0009987,GO:0016311,GO:0016787,GO:0016788,GO:0016791,GO:0042221,GO:0042578,GO:0043226,GO:0043227,GO:0043229,GO:0043231,GO:0044237,GO:0044424,GO:0044464,GO:0050896,GO:0051716,GO:0070887,GO:0097237,GO:0098754,GO:1990748	NA	NA	DUF89	OTHER	1	4.7e-05	NA	NA	NA	NA	NA	NA
179231	NA	NA	NA	NA	By MS/MS	NA	0	0	0	0	0	0	0	0	0	0	0	0	82508.K1V0R2	6.65e-308	887	COG5594@1|root,KOG1134@2759|Eukaryota,38CBQ@33154|Opisthokonta,3NY6R@4751|Fungi,3UY9X@5204|Basidiomycota,3VE47@5234|Tremellales	4751|Fungi	S	Cytosolic domain of 10TM putative phosphate transporter	NA	GO:0000322,GO:0000323,GO:0000324,GO:0000329,GO:0003674,GO:0005215,GO:0005216,GO:0005227,GO:0005261,GO:0005575,GO:0005622,GO:0005623,GO:0005737,GO:0005773,GO:0005774,GO:0005783,GO:0006810,GO:0006811,GO:0006812,GO:0006816,GO:0008150,GO:0008324,GO:0012505,GO:0015075,GO:0015085,GO:0015267,GO:0015318,GO:0016020,GO:0016021,GO:0022803,GO:0022836,GO:0022838,GO:0022839,GO:0022857,GO:0022890,GO:0030001,GO:…	ko:K21989	NA	PHM7_cyt,RSN1_7TM,RSN1_TM	OTHER	1	0	NA	NA	NA	NA	NA	NA
179907	NA	By MS/MS	NA	NA	By MS/MS	NA	0	4318200	0	0	5126900	0	0	0	0	0	0	0	82508.K1W8W2	2.02e-160	490	2CZIV@1|root,2SAK5@2759|Eukaryota,3A8DR@33154|Opisthokonta,3P7P4@4751|Fungi,3V27Z@5204|Basidiomycota,3VDNI@5234|Tremellales	4751|Fungi	S	rRNA processing/ribosome biogenesis	NA	NA	NA	NA	RIX1	OTHER	0.973769	0.02625	NA	NA	NA	NA	NA	NA
181119	By MS/MS	By MS/MS	By MS/MS	By MS/MS	By MS/MS	By MS/MS	225240000	898170000	278450000	1145800000	2478000000	1258700000	52278000	132640000	75146000	145710000	127680000	88681000	552467.XP_003191226.1	1.77e-74	228	KOG3366@1|root,KOG3366@2759|Eukaryota,39YEZ@33154|Opisthokonta,3P34B@4751|Fungi,3V0RC@5204|Basidiomycota,3VFQE@5234|Tremellales	4751|Fungi	C	Mitochondrial membrane ATP synthase (F(1)F(0) ATP synthase or Complex V) produces ATP from ADP in the presence of a proton gradient across the membrane which is generated by electron transport complexes of the respiratory chain. F-type ATPases consist of two structural domains, F(1) - containing the extramembraneous catalytic core, and F(0) - containing the membrane proton channel, linked togethe…	ATP7	GO:0000274,GO:0000276,GO:0003674,GO:0005198,GO:0005575,GO:0005622,GO:0005623,GO:0005737,GO:0005739,GO:0005740,GO:0005743,GO:0005753,GO:0006091,GO:0006119,GO:0006139,GO:0006163,GO:0006164,GO:0006725,GO:0006753,GO:0006754,GO:0006793,GO:0006796,GO:0006807,GO:0006810,GO:0006811,GO:0006812,GO:0006839,GO:0008150,GO:0008152,GO:0009058,GO:0009117,GO:0009123,GO:0009124,GO:0009126,GO:0009127,GO:0009141,GO:…	ko:K02138	ko00190,ko01100,ko04714,ko05010,ko05012,ko05016,map00190,map01100,map04714,map05010,map05012,map05016	Mt_ATP-synt_D	OTHER	1	0	NA	NA	NA	NA	NA	NA
183015	NA	NA	NA	NA	By MS/MS	By MS/MS	0	0	0	0	0	0	0	0	0	0	0	0	5207.AAW44628	5.37e-170	482	KOG1566@1|root,KOG1566@2759|Eukaryota,38D3U@33154|Opisthokonta,3NY6M@4751|Fungi,3UZG7@5204|Basidiomycota,3VEE1@5234|Tremellales	4751|Fungi	S	Transcriptional repressor	HYM1	GO:0000003,GO:0000131,GO:0000920,GO:0003674,GO:0003824,GO:0004672,GO:0005575,GO:0005622,GO:0005623,GO:0005634,GO:0005737,GO:0005815,GO:0005816,GO:0005856,GO:0005933,GO:0005937,GO:0006355,GO:0006464,GO:0006468,GO:0006793,GO:0006796,GO:0006807,GO:0007114,GO:0007117,GO:0007118,GO:0008104,GO:0008150,GO:0008152,GO:0008360,GO:0009889,GO:0009987,GO:0010468,GO:0010556,GO:0015630,GO:0016301,GO:0016310,GO:…	ko:K08272	ko04150,ko04152,map04150,map04152	Mo25	OTHER	1	0	NA	NA	NA	NA	NA	NA
187249	By matching	By MS/MS	NA	By MS/MS	By MS/MS	By MS/MS	2997200	5886400	0	0	4596000	0	0	0	0	0	0	0	82508.K1VGI0	0	1215	28IQG@1|root,2QR1M@2759|Eukaryota,39S98@33154|Opisthokonta,3NX6Y@4751|Fungi,3V5CS@5204|Basidiomycota,3VCNF@5234|Tremellales	4751|Fungi	K	Fungal specific transcription factor domain	NA	NA	NA	NA	Fungal_trans,Zn_clus	OTHER	1	3e-06	NA	NA	NA	NA	NA	NA
190929	By MS/MS	By MS/MS	By MS/MS	NA	By MS/MS	By MS/MS	240830000	148750000	21076000	0	172760000	557650000	263750000	64364000	0	0	41322000	91599000	5207.AAW42843	1.47e-79	300	KOG1216@1|root,KOG1216@2759|Eukaryota,38BYG@33154|Opisthokonta,3P70D@4751|Fungi,3V2I9@5204|Basidiomycota,3VFUB@5234|Tremellales	4751|Fungi	S	biological adhesion	NA	NA	NA	NA	-	SP	0.000331	0.999622	CS pos: 33-34. Pr: 0.9774	NA	NA	NA	NA	NA
191864	By MS/MS	By MS/MS	By MS/MS	By matching	By matching	NA	8476300	2770200	4041000	8757100	9760800	0	0	0	0	0	0	0	NA	NA	NA	NA	NA	NA	NA	NA	NA	NA	NA	NA	OTHER	1	0	NA	NA	NA	NA	NA	NA
192101	By MS/MS	By MS/MS	By MS/MS	By matching	By matching	By MS/MS	6867700	3855200	593400	1070400	5606900	15178000	0	1275400	0	0	0	3823900	NA	NA	NA	NA	NA	NA	NA	NA	NA	NA	NA	NA	SP	0.000474	0.999506	CS pos: 12-13. Pr: 0.9789	NA	NA	NA	NA	NA
192901	By MS/MS	By MS/MS	By MS/MS	By MS/MS	By MS/MS	By MS/MS	13112000	25588000	5229400	34177000	65831000	72760000	5235600	8373100	0	6794000	5118400	6445600	82508.K1VNT4	4.24e-125	368	28M44@1|root,2QTM1@2759|Eukaryota,3A10S@33154|Opisthokonta,3P21I@4751|Fungi,3VBW8@5204|Basidiomycota,3VDTS@5234|Tremellales	4751|Fungi	S	Putative cyclase	NA	NA	NA	NA	Cyclase	OTHER	1	0	NA	NA	NA	NA	NA	NA
194463	NA	By MS/MS	NA	By MS/MS	By MS/MS	By MS/MS	0	4121300	0	0	5231700	7232500	0	0	0	0	0	0	82508.K1V2U5	4.7e-124	364	COG5041@1|root,KOG3092@2759|Eukaryota,38EN5@33154|Opisthokonta,3NXI9@4751|Fungi,3UY4A@5204|Basidiomycota,3VEKT@5234|Tremellales	4751|Fungi	DKT	Plays a complex role in regulating the basal catalytic activity of the alpha subunit	CKB1	GO:0001932,GO:0001933,GO:0003674,GO:0004857,GO:0004860,GO:0005575,GO:0005622,GO:0005623,GO:0005634,GO:0005730,GO:0005956,GO:0006355,GO:0006356,GO:0006359,GO:0006464,GO:0006468,GO:0006469,GO:0006793,GO:0006796,GO:0006807,GO:0006950,GO:0006974,GO:0007154,GO:0007165,GO:0008150,GO:0008152,GO:0009889,GO:0009892,GO:0009987,GO:0010468,GO:0010556,GO:0010563,GO:0010605,GO:0016310,GO:0018105,GO:0018107,GO:…	ko:K03115	ko03008,ko04064,ko04137,ko04139,ko04310,ko04520,ko04712,ko05162,ko05168,ko05169,map03008,map04064,map04137,map04139,map04310,map04520,map04712,map05162,map05168,map05169	CK_II_beta	OTHER	1	0	NA	NA	NA	NA	NA	NA
195614	NA	By MS/MS	NA	By matching	By matching	NA	0	4690300	0	5930500	8726500	0	0	0	0	0	0	0	82508.K1VBU7	8.93e-52	174	2D053@1|root,2SCUH@2759|Eukaryota,3ADS9@33154|Opisthokonta,3P9VD@4751|Fungi	4751|Fungi	-	-	NA	NA	NA	NA	Cupin_2	OTHER	1	2e-06	NA	NA	NA	NA	NA	NA
195692	By MS/MS	By MS/MS	By MS/MS	By MS/MS	By MS/MS	By MS/MS	405520000	594820000	440820000	1404700000	3575900000	1924000000	165960000	150730000	199380000	265090000	340690000	235610000	82508.K1V9V9	3.34e-107	310	COG0094@1|root,KOG0397@2759|Eukaryota,38BMT@33154|Opisthokonta,3NTW9@4751|Fungi,3UZCI@5204|Basidiomycota,3VD7D@5234|Tremellales	4751|Fungi	J	Belongs to the universal ribosomal protein uL5 family	RPL11	GO:0000027,GO:0002181,GO:0003674,GO:0003676,GO:0003723,GO:0003735,GO:0005198,GO:0005488,GO:0005575,GO:0005622,GO:0005623,GO:0005737,GO:0005829,GO:0005840,GO:0006412,GO:0006518,GO:0006807,GO:0006996,GO:0008150,GO:0008152,GO:0009058,GO:0009059,GO:0009987,GO:0010467,GO:0015934,GO:0015935,GO:0016043,GO:0019538,GO:0022607,GO:0022613,GO:0022618,GO:0022625,GO:0022626,GO:0022627,GO:0032991,GO:0034622,GO:…	ko:K02868	ko03010,map03010	Ribosomal_L5,Ribosomal_L5_C	OTHER	1	0	NA	NA	NA	NA	NA	NA
197128	NA	NA	NA	NA	By MS/MS	By MS/MS	0	0	0	0	6030400	19982000	0	0	0	0	0	0	140110.NechaP66818	2.09e-165	481	COG2133@1|root,2QPZ1@2759|Eukaryota,39SSC@33154|Opisthokonta,3NVWQ@4751|Fungi,3QKJP@4890|Ascomycota,215B1@147550|Sordariomycetes,3TEDU@5125|Hypocreales,1FM3H@110618|Nectriaceae	4751|Fungi	G	Glucose sorbosone dehydrogenase	NA	NA	NA	NA	-	SP	0.000256	0.999748	CS pos: 22-23. Pr: 0.9500	AA	AA12	NA	AA12:1.1	AA12*1
203141	By MS/MS	By MS/MS	By MS/MS	By MS/MS	By MS/MS	By MS/MS	126700000	279300000	97201000	358730000	770180000	907380000	30415000	28192000	27631000	39378000	40319000	54387000	82508.K1W534	7.86e-188	528	COG0214@1|root,KOG1606@2759|Eukaryota,38HZF@33154|Opisthokonta,3NVDT@4751|Fungi,3UZF1@5204|Basidiomycota,3VE95@5234|Tremellales	4751|Fungi	H	SOR/SNZ family	SNZ1	GO:0000096,GO:0000097,GO:0003674,GO:0003824,GO:0003922,GO:0005575,GO:0005576,GO:0006082,GO:0006520,GO:0006534,GO:0006535,GO:0006563,GO:0006725,GO:0006766,GO:0006767,GO:0006790,GO:0006807,GO:0008150,GO:0008152,GO:0008614,GO:0008615,GO:0008652,GO:0009058,GO:0009069,GO:0009070,GO:0009110,GO:0009987,GO:0016053,GO:0016874,GO:0016879,GO:0016884,GO:0017144,GO:0018130,GO:0019344,GO:0019438,GO:0019752,GO:…	ko:K06215	ko00750,map00750	SOR_SNZ	OTHER	1	0	NA	NA	NA	NA	NA	NA
203458	By MS/MS	By MS/MS	By MS/MS	By MS/MS	By MS/MS	By MS/MS	304890000	581390000	209950000	501330000	1403800000	1199500000	48312000	54453000	40321000	64950000	59468000	71874000	82508.K1WXS0	8.39e-151	441	28MZB@1|root,2QUI6@2759|Eukaryota,38HPW@33154|Opisthokonta,3NZ44@4751|Fungi,3V0FB@5204|Basidiomycota,3VDPE@5234|Tremellales	4751|Fungi	S	von Willebrand factor (vWF) type A domain	NA	NA	NA	NA	vWA-TerF-like	OTHER	1	0	NA	NA	NA	NA	NA	NA
206942	By MS/MS	By MS/MS	By MS/MS	By MS/MS	By MS/MS	By MS/MS	95968000	232490000	80805000	117240000	314710000	140310000	17699000	23981000	19112000	16223000	12222000	9709000	82508.K1VJ95	0	1060	COG1022@1|root,KOG1256@2759|Eukaryota,38BK9@33154|Opisthokonta,3NUAR@4751|Fungi,3UZGX@5204|Basidiomycota,3VE4G@5234|Tremellales	4751|Fungi	I	AMP-binding enzyme	FAA2	GO:0001676,GO:0003674,GO:0003824,GO:0004467,GO:0005575,GO:0005622,GO:0005623,GO:0005737,GO:0005739,GO:0005777,GO:0006082,GO:0006629,GO:0006631,GO:0008150,GO:0008152,GO:0009987,GO:0015645,GO:0016405,GO:0016874,GO:0016877,GO:0016878,GO:0019752,GO:0031956,GO:0031957,GO:0032787,GO:0042579,GO:0043226,GO:0043227,GO:0043229,GO:0043231,GO:0043436,GO:0044237,GO:0044238,GO:0044255,GO:0044281,GO:0044424,GO:…	ko:K01897	ko00061,ko00071,ko01100,ko01212,ko02024,ko03320,ko04146,ko04216,ko04714,ko04920,map00061,map00071,map01100,map01212,map02024,map03320,map04146,map04216,map04714,map04920	AMP-binding	OTHER	1	4e-06	NA	NA	NA	NA	NA	NA
209172	By MS/MS	By MS/MS	By MS/MS	By MS/MS	By MS/MS	By MS/MS	65358000	182420000	64783000	127300000	239840000	118390000	12873000	16372000	11861000	13260000	9406100	8051100	552467.XP_003191551.1	0	1125	COG0699@1|root,KOG0446@2759|Eukaryota,38C4B@33154|Opisthokonta,3NU4R@4751|Fungi,3UZQK@5204|Basidiomycota,3VEET@5234|Tremellales	4751|Fungi	U	Belongs to the TRAFAC class dynamin-like GTPase superfamily. Dynamin Fzo YdjA family	VPS1	GO:0000266,GO:0000322,GO:0000323,GO:0000324,GO:0000329,GO:0003373,GO:0003374,GO:0003674,GO:0003774,GO:0003824,GO:0003924,GO:0005488,GO:0005515,GO:0005575,GO:0005622,GO:0005623,GO:0005737,GO:0005739,GO:0005740,GO:0005741,GO:0005768,GO:0005770,GO:0005773,GO:0005774,GO:0005777,GO:0005829,GO:0005856,GO:0005938,GO:0006605,GO:0006623,GO:0006810,GO:0006886,GO:0006897,GO:0006996,GO:0007005,GO:0007010,GO:…	ko:K17065	ko04139,ko04214,ko04217,ko04621,ko04668,map04139,map04214,map04217,map04621,map04668	Dynamin_M,Dynamin_N,GED	OTHER	1	0	NA	NA	NA	NA	NA	NA
212933	NA	NA	NA	By MS/MS	NA	NA	0	0	0	0	0	0	0	0	0	0	0	0	5217.XP_007007218.1	3.57e-89	281	KOG2086@1|root,KOG2086@2759|Eukaryota,38GGJ@33154|Opisthokonta,3NW1D@4751|Fungi,3UY4V@5204|Basidiomycota,3VF7Y@5234|Tremellales	4751|Fungi	Y	Domain present in Saccharomyces cerevisiae Shp1, Drosophila melanogaster eyes closed gene (eyc), and vertebrate p47.	SHP1	GO:0000003,GO:0000045,GO:0000819,GO:0003006,GO:0003674,GO:0005488,GO:0005515,GO:0005575,GO:0005622,GO:0005623,GO:0005634,GO:0005737,GO:0005829,GO:0005975,GO:0005976,GO:0005977,GO:0006073,GO:0006091,GO:0006112,GO:0006508,GO:0006511,GO:0006807,GO:0006914,GO:0006950,GO:0006996,GO:0006997,GO:0006998,GO:0007030,GO:0007033,GO:0007049,GO:0007059,GO:0008150,GO:0008152,GO:0008608,GO:0009056,GO:0009057,GO:…	ko:K14012	ko04141,map04141	SEP,UBA_4,UBX	OTHER	1	0	NA	NA	NA	NA	NA	NA
213901	By MS/MS	By MS/MS	By MS/MS	By MS/MS	By MS/MS	By MS/MS	21039000	37161000	20058000	24423000	59542000	46564000	10683000	16001000	11149000	7622600	5822300	7195600	5217.XP_007007849.1	6.51e-135	395	COG2130@1|root,KOG1196@2759|Eukaryota,39AU4@33154|Opisthokonta,3NUYM@4751|Fungi,3V06J@5204|Basidiomycota,3VFET@5234|Tremellales	4751|Fungi	S	N-terminal domain of oxidoreductase	NA	NA	ko:K07119	NA	ADH_N_2,ADH_zinc_N	OTHER	1	0	NA	NA	NA	NA	NA	NA
214541	NA	NA	NA	By MS/MS	By matching	By MS/MS	0	0	0	6671700	13045000	25037000	0	0	0	0	0	0	NA	NA	NA	NA	NA	NA	NA	NA	NA	NA	NA	NA	OTHER	1	0	NA	NA	NA	NA	NA	NA
217302	By matching	By MS/MS	By matching	By MS/MS	By MS/MS	By MS/MS	9907400	52173000	21141000	49938000	94608000	51334000	0	18949000	17764000	0	13432000	14463000	552467.XP_003195709.1	2.24e-60	188	KOG3300@1|root,KOG3300@2759|Eukaryota,3A3JT@33154|Opisthokonta,3P3YN@4751|Fungi,3V1HA@5204|Basidiomycota,3VFCZ@5234|Tremellales	4751|Fungi	CD	GRIM-19 protein	NA	NA	ko:K11353	ko00190,ko01100,ko04714,ko04723,ko04932,ko05010,ko05012,ko05016,map00190,map01100,map04714,map04723,map04932,map05010,map05012,map05016	GRIM-19	OTHER	0.999984	3.8e-05	NA	NA	NA	NA	NA	NA
218039	By MS/MS	By MS/MS	NA	By MS/MS	By MS/MS	NA	1447800	4929200	0	9528200	9159400	0	0	0	0	0	0	0	5207.AAW46802	0	897	COG5329@1|root,KOG1889@2759|Eukaryota,38DI4@33154|Opisthokonta,3NUMD@4751|Fungi,3UYH6@5204|Basidiomycota,3VEAT@5234|Tremellales	4751|Fungi	I	SacI homology domain	SAC1	GO:0000139,GO:0002178,GO:0003674,GO:0003824,GO:0004438,GO:0005575,GO:0005622,GO:0005623,GO:0005737,GO:0005739,GO:0005740,GO:0005741,GO:0005783,GO:0005789,GO:0005794,GO:0005795,GO:0005797,GO:0005938,GO:0006629,GO:0006644,GO:0006650,GO:0006661,GO:0006793,GO:0006796,GO:0008150,GO:0008152,GO:0008610,GO:0008654,GO:0009058,GO:0009987,GO:0012505,GO:0016020,GO:0016021,GO:0016311,GO:0016787,GO:0016788,GO:…	ko:K21797	ko00562,ko01100,ko04070,map00562,map01100,map04070	Syja_N	OTHER	1	2e-05	NA	NA	NA	NA	NA	NA
220129	By matching	By matching	By matching	By matching	By MS/MS	By matching	3515600	5624200	3108100	11484000	20834000	18352000	0	0	0	0	0	0	5207.AAW41770	1.81e-38	128	COG1644@1|root,KOG3497@2759|Eukaryota,3A8D3@33154|Opisthokonta,3P6YC@4751|Fungi,3V2FX@5204|Basidiomycota,3VH6W@5234|Tremellales	4751|Fungi	K	RNA polymerases N / 8 kDa subunit	RPB10	GO:0000428,GO:0003674,GO:0005488,GO:0005575,GO:0005622,GO:0005623,GO:0005634,GO:0005654,GO:0005665,GO:0005666,GO:0005730,GO:0005736,GO:0006139,GO:0006351,GO:0006360,GO:0006366,GO:0006383,GO:0006399,GO:0006725,GO:0006807,GO:0008150,GO:0008152,GO:0008270,GO:0009058,GO:0009059,GO:0009304,GO:0009987,GO:0010467,GO:0016070,GO:0016591,GO:0018130,GO:0019438,GO:0030880,GO:0031974,GO:0031981,GO:0032774,GO:…	ko:K03007	ko00230,ko00240,ko01100,ko03020,ko04623,ko05016,ko05169,map00230,map00240,map01100,map03020,map04623,map05016,map05169	RNA_pol_N	OTHER	1	0	NA	NA	NA	NA	NA	NA
222522	By MS/MS	By MS/MS	By MS/MS	NA	NA	NA	17832000	58736000	7094600	0	0	0	12502000	17703000	0	0	0	0	397278.JOJN01000002_gene715	1.63999999998029e-313	868	COG0654@1|root,COG0654@2|Bacteria,2GKUZ@201174|Actinobacteria,4DPJP@85009|Propionibacteriales	201174|Actinobacteria	CH	FAD binding domain	NA	NA	ko:K10676	ko00361,ko01100,ko01120,ko01220,map00361,map01100,map01120,map01220	FAD_binding_3	OTHER	1	4e-06	NA	NA	NA	NA	NA	NA
223678	By MS/MS	By MS/MS	By MS/MS	By MS/MS	By MS/MS	By MS/MS	777080000	3438400000	1030300000	5260200000	9480400000	6571900000	100400000	224460000	135800000	300200000	239070000	211520000	NA	NA	NA	NA	NA	NA	NA	NA	NA	NA	NA	NA	OTHER	1	1e-06	NA	NA	NA	NA	NA	NA
225275	By MS/MS	By MS/MS	By MS/MS	By MS/MS	By MS/MS	By MS/MS	859410000	912570000	862320000	862810000	3142000000	2054400000	516180000	235280000	442520000	161750000	180630000	152580000	82508.K1VFD8	2.48e-51	180	2CE4E@1|root,2S64Q@2759|Eukaryota,3AAB7@33154|Opisthokonta,3P7C4@4751|Fungi,3V1W2@5204|Basidiomycota,3VFQU@5234|Tremellales	4751|Fungi	S	Domain of unknown function (DUF3844)	NA	NA	NA	NA	DUF3844	OTHER	1	0	NA	NA	NA	NA	NA	NA
227140	By matching	By MS/MS	By matching	By MS/MS	By MS/MS	By MS/MS	2681600	5429700	2213900	13610000	50033000	31778000	0	2534300	0	4427900	5456900	4364100	NA	NA	NA	NA	NA	NA	NA	NA	NA	NA	NA	NA	OTHER	1	0	NA	NA	NA	NA	NA	NA
228442	By matching	By MS/MS	By MS/MS	By MS/MS	By MS/MS	NA	4010500	5972800	3485500	3783500	17143000	0	0	0	0	0	0	0	5217.XP_007006967.1	6.83e-63	194	COG1436@1|root,KOG3432@2759|Eukaryota,3A3I9@33154|Opisthokonta,3P3TN@4751|Fungi,3V15X@5204|Basidiomycota,3VFUY@5234|Tremellales	4751|Fungi	C	ATP synthase (F/14-kDa) subunit	VMA7	GO:0000221,GO:0000322,GO:0000323,GO:0000324,GO:0000329,GO:0003674,GO:0003824,GO:0005215,GO:0005575,GO:0005622,GO:0005623,GO:0005737,GO:0005773,GO:0005774,GO:0006810,GO:0006811,GO:0006812,GO:0006873,GO:0006885,GO:0007035,GO:0008150,GO:0008324,GO:0009987,GO:0015075,GO:0015077,GO:0015078,GO:0015318,GO:0015399,GO:0015405,GO:0015672,GO:0015988,GO:0015991,GO:0016020,GO:0016021,GO:0016462,GO:0016469,GO:…	ko:K02151	ko00190,ko01100,ko04145,ko04150,ko04721,ko04966,ko05110,ko05120,ko05323,map00190,map01100,map04145,map04150,map04721,map04966,map05110,map05120,map05323	ATP-synt_F	OTHER	1	0	NA	NA	NA	NA	NA	NA
232295	By MS/MS	By MS/MS	By MS/MS	By MS/MS	By MS/MS	By MS/MS	38497000	15084000	34503000	9988700	59026000	107570000	16169000	9050400	14779000	6906900	11895000	20007000	NA	NA	NA	NA	NA	NA	NA	NA	NA	NA	NA	NA	OTHER	0.974273	0.025717	NA	NA	NA	NA	NA	NA
232893	By MS/MS	By MS/MS	By MS/MS	By MS/MS	By MS/MS	By MS/MS	277010000	563110000	320410000	599590000	1081400000	669520000	21444000	25736000	25401000	26933000	17586000	14964000	82508.K1WMM4	0	3920	COG0331@1|root,2QQJX@2759|Eukaryota,38EJX@33154|Opisthokonta,3NV76@4751|Fungi,3UXU7@5204|Basidiomycota,3VEAI@5234|Tremellales	4751|Fungi	I	Acyl transferase domain	NA	GO:0001676,GO:0003674,GO:0003824,GO:0004312,GO:0004314,GO:0004315,GO:0004316,GO:0005575,GO:0005622,GO:0005623,GO:0005737,GO:0005829,GO:0005835,GO:0006082,GO:0006629,GO:0006631,GO:0006633,GO:0008150,GO:0008152,GO:0008610,GO:0008897,GO:0009058,GO:0009987,GO:0016053,GO:0016417,GO:0016419,GO:0016420,GO:0016491,GO:0016614,GO:0016616,GO:0016740,GO:0016746,GO:0016747,GO:0016772,GO:0016780,GO:0019752,GO:…	ko:K00667,ko:K00668	ko00061,ko01100,ko01212,map00061,map01100,map01212	ACPS,Acyl_transf_1,DUF1729,Ketoacyl-synt_C,MaoC_dehydrat_N,MaoC_dehydratas,SAT,adh_short,ketoacyl-synt	OTHER	1	1e-06	NA	NA	NA	NA	NA	NA
233545	By MS/MS	By MS/MS	By MS/MS	By MS/MS	By MS/MS	By MS/MS	78102000	219840000	91943000	45823000	109990000	69247000	15241000	23835000	15936000	6849100	4263000	3526700	82508.K1VZX5	0	899	COG2030@1|root,KOG1206@2759|Eukaryota,38D3K@33154|Opisthokonta,3NV6Q@4751|Fungi,3UZIA@5204|Basidiomycota,3VEN5@5234|Tremellales	4751|Fungi	Q	MaoC like domain	NA	NA	ko:K14729	NA	MaoC_dehydrat_N,MaoC_dehydratas,SCP2,adh_short	OTHER	1	0	NA	NA	NA	NA	NA	NA
237718	NA	By MS/MS	NA	By MS/MS	By MS/MS	By MS/MS	0	4354500	0	12191000	32562000	30372000	0	0	0	0	4565800	5645800	82508.K1VH25	2.04e-133	392	COG2837@1|root,2S0NI@2759|Eukaryota,39VTW@33154|Opisthokonta,3NYSI@4751|Fungi	4751|Fungi	E	peroxidase	NA	NA	ko:K07223	NA	Dyp_perox	OTHER	1	1.1e-05	NA	NA	NA	NA	NA	NA
237785	NA	By MS/MS	NA	NA	NA	NA	0	4983800	0	0	0	0	0	0	0	0	0	0	5286.M7X3W3	2.55e-163	483	COG0154@1|root,KOG1212@2759|Eukaryota,38CWX@33154|Opisthokonta,3NTYP@4751|Fungi,3V04C@5204|Basidiomycota	4751|Fungi	IJT	General amidase	NA	NA	ko:K01426	ko00330,ko00360,ko00380,ko00627,ko00643,ko01120,map00330,map00360,map00380,map00627,map00643,map01120	Amidase	OTHER	1	0	NA	NA	NA	NA	NA	NA
238363	By MS/MS	By matching	By matching	By MS/MS	By MS/MS	By MS/MS	8186900	11555000	4269900	18921000	233000000	190160000	4875700	3479700	2427000	4355200	26702000	29333000	NA	NA	NA	NA	NA	NA	NA	NA	NA	NA	NA	NA	SP	0.000256	0.9997	CS pos: 29-30. Pr: 0.8487	NA	NA	NA	NA	NA
239639	By MS/MS	By MS/MS	By MS/MS	By MS/MS	By MS/MS	By MS/MS	17073000	59831000	14954000	60309000	61094000	40134000	5610600	9359700	7726300	9205600	5029300	4368700	82508.K1VHX7	0	1053	KOG2085@1|root,KOG2085@2759|Eukaryota,38CH2@33154|Opisthokonta,3NTWN@4751|Fungi,3UYWK@5204|Basidiomycota,3VE1M@5234|Tremellales	4751|Fungi	T	The B regulatory subunit might modulate substrate selectivity and catalytic activity, and also might direct the localization of the catalytic enzyme to a particular subcellular compartment	RTS1	GO:0000003,GO:0000075,GO:0000159,GO:0000228,GO:0000278,GO:0000280,GO:0000281,GO:0000775,GO:0000776,GO:0000779,GO:0000780,GO:0000793,GO:0000794,GO:0000819,GO:0000910,GO:0001100,GO:0003674,GO:0005575,GO:0005622,GO:0005623,GO:0005634,GO:0005694,GO:0005737,GO:0005815,GO:0005816,GO:0005819,GO:0005826,GO:0005856,GO:0005933,GO:0005935,GO:0005938,GO:0006464,GO:0006470,GO:0006793,GO:0006796,GO:0006807,GO:…	ko:K11584	ko03015,ko04071,ko04113,ko04114,ko04151,ko04152,ko04261,ko04728,ko05165,map03015,map04071,map04113,map04114,map04151,map04152,map04261,map04728,map05165	B56	OTHER	1	1e-06	NA	NA	NA	NA	NA	NA
240233	NA	By MS/MS	By matching	By MS/MS	By MS/MS	By MS/MS	0	7110700	2372300	6724300	97130000	6554700	0	2536900	0	1850300	9809200	1307700	552467.XP_003191225.1	2.64e-61	201	COG0233@1|root,KOG4759@2759|Eukaryota,3A7S9@33154|Opisthokonta,3P539@4751|Fungi,3V1VX@5204|Basidiomycota,3VFFQ@5234|Tremellales	4751|Fungi	J	Ribosome recycling factor	NA	NA	ko:K02838	NA	RRF	OTHER	1	0	NA	NA	NA	NA	NA	NA
240251	By matching	By MS/MS	NA	By matching	By MS/MS	By MS/MS	1607200	2351000	0	8173600	27749000	7327600	0	0	0	1702600	2179400	1541900	5207.AAW44554	2.48e-70	222	KOG0226@1|root,KOG0226@2759|Eukaryota,38DU1@33154|Opisthokonta,3NV9Q@4751|Fungi,3V10K@5204|Basidiomycota,3VGAR@5234|Tremellales	4751|Fungi	A	RNA recognition motif	NA	GO:0000375,GO:0000377,GO:0000398,GO:0003674,GO:0003676,GO:0003723,GO:0005488,GO:0006139,GO:0006396,GO:0006397,GO:0006725,GO:0006807,GO:0008150,GO:0008152,GO:0008380,GO:0009987,GO:0010467,GO:0016070,GO:0016071,GO:0034641,GO:0043170,GO:0044237,GO:0044238,GO:0045292,GO:0046483,GO:0071704,GO:0090304,GO:0097159,GO:1901360,GO:1901363	NA	NA	RRM_1	OTHER	1	0	NA	NA	NA	NA	NA	NA
241507	NA	NA	NA	By MS/MS	NA	NA	0	0	0	0	0	0	0	0	0	0	0	0	82508.K1VT44	0	1109	KOG4269@1|root,KOG4269@2759|Eukaryota,38FSR@33154|Opisthokonta,3NVRI@4751|Fungi,3UXTA@5204|Basidiomycota,3VDXQ@5234|Tremellales	4751|Fungi	T	GTPase-activator protein for Rho-like GTPases	BEM3	GO:0000131,GO:0003674,GO:0005096,GO:0005488,GO:0005543,GO:0005575,GO:0005622,GO:0005623,GO:0005737,GO:0005826,GO:0005856,GO:0005933,GO:0005934,GO:0005937,GO:0005938,GO:0006996,GO:0007010,GO:0007163,GO:0008047,GO:0008150,GO:0008289,GO:0009966,GO:0009968,GO:0009987,GO:0010646,GO:0010648,GO:0015629,GO:0016043,GO:0023051,GO:0023057,GO:0030010,GO:0030234,GO:0030427,GO:0030695,GO:0030863,GO:0030864,GO:…	ko:K08773,ko:K19840	ko04011,ko04014,ko05200,ko05212,map04011,map04014,map05200,map05212	PH,PX,RhoGAP	OTHER	1	1e-06	NA	NA	NA	NA	NA	NA
245163	By MS/MS	By MS/MS	By MS/MS	By MS/MS	By MS/MS	By MS/MS	193140000	483350000	199420000	413930000	1565000000	2196400000	29217000	46711000	35671000	33466000	56998000	96441000	82508.K1VS49	5.24e-265	730	COG1448@1|root,KOG1411@2759|Eukaryota,38ED5@33154|Opisthokonta,3NU8Q@4751|Fungi,3UZ3P@5204|Basidiomycota,3VDX6@5234|Tremellales	4751|Fungi	E	Aminotransferase class I and II	AAT1	GO:0000096,GO:0001300,GO:0001302,GO:0003674,GO:0003824,GO:0004069,GO:0005575,GO:0005622,GO:0005623,GO:0005737,GO:0005739,GO:0005759,GO:0006082,GO:0006103,GO:0006107,GO:0006520,GO:0006528,GO:0006529,GO:0006530,GO:0006531,GO:0006532,GO:0006533,GO:0006534,GO:0006536,GO:0006538,GO:0006790,GO:0006807,GO:0007568,GO:0007569,GO:0008150,GO:0008152,GO:0008483,GO:0008652,GO:0009056,GO:0009058,GO:0009063,GO:…	ko:K14455	ko00220,ko00250,ko00270,ko00330,ko00350,ko00360,ko00400,ko00710,ko00950,ko00960,ko01100,ko01110,ko01120,ko01130,ko01200,ko01210,ko01230,ko04975,map00220,map00250,map00270,map00330,map00350,map00360,map00400,map00710,map00950,map00960,map01100,map01110,map01120,map01130,map01200,map01210,map01230,map04975	Aminotran_1_2	OTHER	1	1e-06	NA	NA	NA	NA	NA	NA
245176	NA	By MS/MS	NA	NA	NA	NA	0	1945400	0	0	0	0	0	0	0	0	0	0	82508.K1VZX0	1.44e-99	304	KOG2629@1|root,KOG2629@2759|Eukaryota,38HJ0@33154|Opisthokonta,3NZWU@4751|Fungi,3V11R@5204|Basidiomycota,3VEXP@5234|Tremellales	4751|Fungi	MOU	Peroxisomal membrane anchor protein (Pex14p) conserved region	PEX14	GO:0003674,GO:0005102,GO:0005488,GO:0005515,GO:0005575,GO:0005622,GO:0005623,GO:0005737,GO:0005777,GO:0005778,GO:0006605,GO:0006625,GO:0006810,GO:0006886,GO:0006996,GO:0007031,GO:0008104,GO:0008150,GO:0009987,GO:0015031,GO:0015833,GO:0015919,GO:0016020,GO:0016043,GO:0016558,GO:0016560,GO:0017038,GO:0030674,GO:0031090,GO:0031903,GO:0032991,GO:0033036,GO:0033365,GO:0034613,GO:0042579,GO:0042886,GO:…	ko:K13343	ko04146,map04146	Pex14_N	OTHER	1	1.1e-05	NA	NA	NA	NA	NA	NA
248516	By MS/MS	By MS/MS	By MS/MS	By MS/MS	By MS/MS	By MS/MS	77673000	129010000	58292000	110070000	209480000	137970000	23846000	25100000	21186000	16811000	13214000	12076000	82508.K1VTC1	4.94e-205	573	COG0142@1|root,KOG0711@2759|Eukaryota,38DEA@33154|Opisthokonta,3NXTX@4751|Fungi,3UY20@5204|Basidiomycota,3VDRB@5234|Tremellales	4751|Fungi	H	Belongs to the FPP GGPP synthase family	ERG20	GO:0003674,GO:0003824,GO:0004161,GO:0004337,GO:0004659,GO:0005575,GO:0005622,GO:0005623,GO:0005737,GO:0005783,GO:0006066,GO:0006629,GO:0006644,GO:0006694,GO:0006696,GO:0006720,GO:0006721,GO:0006793,GO:0006796,GO:0008150,GO:0008152,GO:0008202,GO:0008204,GO:0008299,GO:0008610,GO:0008654,GO:0009058,GO:0009987,GO:0012505,GO:0016114,GO:0016125,GO:0016126,GO:0016128,GO:0016129,GO:0016740,GO:0016765,GO:…	ko:K00787	ko00900,ko01100,ko01110,ko01130,ko05164,ko05166,map00900,map01100,map01110,map01130,map05164,map05166	polyprenyl_synt	OTHER	1	0	NA	NA	NA	NA	NA	NA
249926	By matching	By MS/MS	By MS/MS	By MS/MS	By MS/MS	By MS/MS	6919900	26501000	20890000	23156000	135240000	71530000	6384100	6701600	9633800	5920100	7464800	8277900	82508.K1VY97	1.61e-88	272	KOG0379@1|root,KOG0379@2759|Eukaryota,39S97@33154|Opisthokonta,3NXQV@4751|Fungi,3V18V@5204|Basidiomycota	4751|Fungi	S	Galactose oxidase, central domain	NA	NA	NA	NA	Kelch_3,Kelch_4	OTHER	1	1e-05	NA	NA	NA	NA	NA	NA
250401	By MS/MS	By MS/MS	By MS/MS	By matching	By MS/MS	By MS/MS	62476000	27871000	40618000	15816000	135890000	263450000	20188000	7297900	13776000	0	11429000	22985000	82508.K1VS55	0	944	COG1404@1|root,KOG3525@2759|Eukaryota,38C1N@33154|Opisthokonta,3NV4P@4751|Fungi,3UZBI@5204|Basidiomycota,3VDQ9@5234|Tremellales	4751|Fungi	O	Proprotein convertase P-domain	KEX2	GO:0000139,GO:0000322,GO:0000323,GO:0000324,GO:0003674,GO:0003824,GO:0004175,GO:0004252,GO:0004857,GO:0004866,GO:0004867,GO:0005488,GO:0005515,GO:0005575,GO:0005622,GO:0005623,GO:0005737,GO:0005773,GO:0005794,GO:0005802,GO:0006508,GO:0006807,GO:0007323,GO:0008150,GO:0008152,GO:0008233,GO:0008236,GO:0009892,GO:0009986,GO:0010466,GO:0010467,GO:0010605,GO:0010951,GO:0012505,GO:0016020,GO:0016485,GO:…	ko:K01341	NA	P_proprotein,Peptidase_S8	SP	0.000452	0.999513	CS pos: 16-17. Pr: 0.9757	NA	NA	NA	NA	NA
254284	NA	By MS/MS	By matching	NA	NA	NA	0	3386500	2201100	0	0	0	0	0	0	0	0	0	82508.K1WIQ3	2.09e-266	757	COG0598@1|root,2QPTQ@2759|Eukaryota,38FZW@33154|Opisthokonta,3NTYW@4751|Fungi,3UZ2W@5204|Basidiomycota,3VDZG@5234|Tremellales	4751|Fungi	P	CorA-like Mg2+ transporter protein	MNR2	GO:0000322,GO:0000323,GO:0000324,GO:0000329,GO:0003674,GO:0005215,GO:0005575,GO:0005622,GO:0005623,GO:0005737,GO:0005773,GO:0005774,GO:0006810,GO:0006811,GO:0006812,GO:0006873,GO:0006875,GO:0008150,GO:0008324,GO:0009987,GO:0010960,GO:0010961,GO:0015075,GO:0015095,GO:0015318,GO:0015693,GO:0016020,GO:0016021,GO:0019725,GO:0022857,GO:0022890,GO:0030001,GO:0030003,GO:0031090,GO:0031224,GO:0034220,GO:…	ko:K16073	NA	CorA	OTHER	1	1e-06	NA	NA	NA	NA	NA	NA
256069	By MS/MS	By MS/MS	By MS/MS	By MS/MS	By matching	By matching	6475800	14225000	6414600	9644200	30741000	15076000	0	0	0	0	0	0	5207.AAW44915	1.34e-198	563	KOG0594@1|root,KOG0594@2759|Eukaryota,38B58@33154|Opisthokonta,3NVF8@4751|Fungi,3V01X@5204|Basidiomycota,3VCNV@5234|Tremellales	4751|Fungi	T	Belongs to the protein kinase superfamily	PHO85	GO:0000003,GO:0000075,GO:0000077,GO:0000082,GO:0000083,GO:0000086,GO:0000122,GO:0000226,GO:0000278,GO:0000302,GO:0000307,GO:0003674,GO:0003824,GO:0004672,GO:0004674,GO:0004693,GO:0005488,GO:0005515,GO:0005575,GO:0005622,GO:0005623,GO:0005634,GO:0005654,GO:0005737,GO:0005768,GO:0005813,GO:0005815,GO:0005829,GO:0005856,GO:0005979,GO:0006109,GO:0006139,GO:0006259,GO:0006260,GO:0006325,GO:0006355,GO:…	ko:K06655,ko:K08282	ko04111,ko04138,map04111,map04138	Pkinase	OTHER	1	0	NA	NA	NA	NA	NA	NA
257630	By MS/MS	By MS/MS	By MS/MS	By MS/MS	By MS/MS	By MS/MS	5121900	10108000	7706800	27593000	36589000	34458000	0	4608400	4719600	6632900	4011300	5361300	5207.AAW41194	3.48e-72	241	2E2GY@1|root,2S9QN@2759|Eukaryota,3AAKD@33154|Opisthokonta,3P735@4751|Fungi,3V2C7@5204|Basidiomycota,3VFBR@5234|Tremellales	4751|Fungi	S	CUE domain	NA	NA	NA	NA	CUE	OTHER	1	0	NA	NA	NA	NA	NA	NA
258491	By matching	By MS/MS	By matching	By MS/MS	By MS/MS	By MS/MS	6767500	11363000	7131700	35937000	70513000	83630000	0	0	0	9079400	8553400	14350000	552467.XP_003192622.1	3.64e-117	348	2B9FA@1|root,2S0TT@2759|Eukaryota,39YWD@33154|Opisthokonta,3NZYT@4751|Fungi,3V0WK@5204|Basidiomycota,3VEW3@5234|Tremellales	4751|Fungi	S	metallo-beta-lactamase	NA	NA	NA	NA	Lactamase_B	OTHER	0.999835	0.00021	NA	NA	NA	NA	NA	NA
258621	By MS/MS	By MS/MS	By MS/MS	By MS/MS	By MS/MS	By MS/MS	497750000	1259400000	479470000	1308100000	1899500000	2009700000	86379000	122970000	93152000	130640000	74495000	114200000	82508.K1VQX6	1.51e-203	569	COG1064@1|root,KOG0023@2759|Eukaryota,390GY@33154|Opisthokonta,3NW0B@4751|Fungi,3UYYZ@5204|Basidiomycota,3VE9Q@5234|Tremellales	4751|Fungi	Q	Alcohol dehydrogenase GroES-like domain	ADH1	GO:0000947,GO:0000955,GO:0003674,GO:0003824,GO:0004022,GO:0005575,GO:0005576,GO:0005622,GO:0005623,GO:0005634,GO:0005737,GO:0005739,GO:0005759,GO:0005886,GO:0005975,GO:0005996,GO:0006006,GO:0006066,GO:0006067,GO:0006068,GO:0006081,GO:0006082,GO:0006090,GO:0006091,GO:0006113,GO:0006115,GO:0006116,GO:0006117,GO:0006139,GO:0006163,GO:0006520,GO:0006566,GO:0006567,GO:0006725,GO:0006732,GO:0006733,GO:…	ko:K01568,ko:K13953	ko00010,ko00071,ko00350,ko00625,ko00626,ko00830,ko00980,ko00982,ko01100,ko01110,ko01120,ko01130,ko01220,map00010,map00071,map00350,map00625,map00626,map00830,map00980,map00982,map01100,map01110,map01120,map01130,map01220	ADH_N,ADH_zinc_N	OTHER	1	0	NA	NA	NA	NA	NA	NA
259455	By MS/MS	By MS/MS	By MS/MS	By MS/MS	By MS/MS	By MS/MS	476800000	1265700000	537230000	728170000	1595000000	929500000	49103000	67674000	51635000	44304000	29958000	23444000	82508.K1VXE7	0	1697	COG0474@1|root,KOG0205@2759|Eukaryota,38CYC@33154|Opisthokonta,3NUFA@4751|Fungi,3UYHC@5204|Basidiomycota,3VECI@5234|Tremellales	4751|Fungi	P	Plasma membrane	PMA1	GO:0000166,GO:0003674,GO:0003824,GO:0005215,GO:0005488,GO:0005524,GO:0005575,GO:0005622,GO:0005623,GO:0005737,GO:0005739,GO:0005829,GO:0005886,GO:0005887,GO:0006810,GO:0006811,GO:0006812,GO:0006873,GO:0006885,GO:0008144,GO:0008150,GO:0008324,GO:0008553,GO:0009987,GO:0015075,GO:0015077,GO:0015078,GO:0015318,GO:0015399,GO:0015405,GO:0015662,GO:0015672,GO:0016020,GO:0016021,GO:0016043,GO:0016462,GO:…	ko:K01535	ko00190,map00190	Cation_ATPase_N,E1-E2_ATPase,Hydrolase	OTHER	1	4e-06	NA	NA	NA	NA	NA	NA
261698	By MS/MS	By MS/MS	By MS/MS	By MS/MS	By MS/MS	By MS/MS	271600000	172830000	253920000	648010000	2350200000	1633500000	130910000	52786000	146880000	166660000	249860000	252400000	NA	NA	NA	NA	NA	NA	NA	NA	NA	NA	NA	NA	SP	0.000229	0.999747	CS pos: 16-17. Pr: 0.9766	NA	NA	NA	NA	NA
262136	By matching	By matching	By matching	By MS/MS	By MS/MS	By MS/MS	10105000	9898400	13549000	23738000	37593000	126320000	7021300	0	8963600	13584000	11403000	14732000	552467.XP_003195584.1	4.37e-263	727	KOG0739@1|root,KOG0739@2759|Eukaryota,38D1Q@33154|Opisthokonta,3NUSN@4751|Fungi,3UXVV@5204|Basidiomycota,3VDQT@5234|Tremellales	4751|Fungi	O	Vps4 C terminal oligomerisation domain	VPS4	GO:0000166,GO:0002790,GO:0003674,GO:0003824,GO:0005488,GO:0005515,GO:0005524,GO:0005575,GO:0005622,GO:0005623,GO:0005634,GO:0005737,GO:0005768,GO:0005783,GO:0006508,GO:0006511,GO:0006605,GO:0006623,GO:0006629,GO:0006807,GO:0006810,GO:0006886,GO:0006900,GO:0006914,GO:0006996,GO:0006997,GO:0006998,GO:0007032,GO:0007033,GO:0007034,GO:0008104,GO:0008144,GO:0008150,GO:0008152,GO:0008202,GO:0009056,GO:…	ko:K12196	ko04144,ko04217,map04144,map04217	AAA,MIT,Vps4_C	OTHER	1	0	NA	NA	NA	NA	NA	NA
262844	NA	NA	By MS/MS	NA	By MS/MS	NA	0	0	0	0	11272000	0	0	0	0	0	0	0	5217.XP_007006660.1	1.06e-160	471	29CJI@1|root,2RJPB@2759|Eukaryota,38BXG@33154|Opisthokonta,3NXGN@4751|Fungi,3V36E@5204|Basidiomycota,3VF5B@5234|Tremellales	4751|Fungi	S	Protein-vacuolar targeting-related protein	VPS62	GO:0000322,GO:0000323,GO:0000324,GO:0000329,GO:0005575,GO:0005622,GO:0005623,GO:0005737,GO:0005773,GO:0005774,GO:0005783,GO:0006605,GO:0006623,GO:0006810,GO:0006886,GO:0007034,GO:0008104,GO:0008150,GO:0012505,GO:0015031,GO:0015833,GO:0016020,GO:0031090,GO:0033036,GO:0033365,GO:0034613,GO:0042886,GO:0043226,GO:0043227,GO:0043229,GO:0043231,GO:0044422,GO:0044424,GO:0044437,GO:0044444,GO:0044446,GO:…	NA	NA	Vps62	SP	0.000239	0.999692	CS pos: 15-16. Pr: 0.9781	NA	NA	NA	NA	NA
263110	By MS/MS	By MS/MS	By MS/MS	By MS/MS	By MS/MS	By MS/MS	601500000	1145100000	428160000	263080000	840710000	763860000	160130000	210080000	147580000	97479000	62301000	68229000	82508.K1VGJ2	6.09e-157	452	COG1064@1|root,KOG0023@2759|Eukaryota,390GY@33154|Opisthokonta,3NW0B@4751|Fungi,3UYYZ@5204|Basidiomycota,3VE9Q@5234|Tremellales	4751|Fungi	Q	Alcohol dehydrogenase GroES-like domain	NA	NA	ko:K13953	ko00010,ko00071,ko00350,ko00625,ko00626,ko00830,ko00980,ko00982,ko01100,ko01110,ko01120,ko01130,ko01220,map00010,map00071,map00350,map00625,map00626,map00830,map00980,map00982,map01100,map01110,map01120,map01130,map01220	ADH_N,ADH_zinc_N	OTHER	1	0	NA	NA	NA	NA	NA	NA
264070	By MS/MS	By MS/MS	By MS/MS	By MS/MS	By MS/MS	By MS/MS	315690000	225720000	352150000	188830000	2056100000	3105200000	94555000	49809000	99388000	38393000	113690000	246830000	72558.CBQ73608	2.86e-12	70.1	2CYWP@1|root,2S6X4@2759|Eukaryota,3AAJF@33154|Opisthokonta,3P74E@4751|Fungi,3VBXX@5204|Basidiomycota,3N5F9@452284|Ustilaginomycotina	4751|Fungi	S	Lytic transglycolase	NA	NA	NA	NA	DPBB_1	SP	0.000321	0.999652	CS pos: 19-20. Pr: 0.9569	NA	NA	NA	NA	NA
265144	By matching	By MS/MS	NA	By matching	By MS/MS	By MS/MS	3188400	10447000	0	11413000	22213000	17062000	0	0	0	3352900	2813500	2813400	82508.K1VKX8	1.57e-62	207	COG0384@1|root,KOG3033@2759|Eukaryota,39RJ0@33154|Opisthokonta,3P5DT@4751|Fungi,3V2HN@5204|Basidiomycota,3VH3X@5234|Tremellales	4751|Fungi	S	Phenazine biosynthesis-like protein	NA	NA	NA	NA	PhzC-PhzF	OTHER	1	0	NA	NA	NA	NA	NA	NA
265577	By MS/MS	By MS/MS	By MS/MS	By MS/MS	By MS/MS	By MS/MS	24473000	35428000	23009000	82995000	416570000	220370000	15538000	11666000	22988000	26940000	70203000	50408000	5217.XP_007006972.1	6.12e-35	123	KOG1772@1|root,KOG1772@2759|Eukaryota,3A6AE@33154|Opisthokonta,3P53V@4751|Fungi,3V1M0@5204|Basidiomycota,3VFM7@5234|Tremellales	4751|Fungi	C	Catalytic subunit of the peripheral V1 complex of vacuolar ATPase (V-ATPase). V-ATPase is responsible for acidifying a variety of intracellular compartments in eukaryotic cells	NA	GO:0000166,GO:0000221,GO:0000322,GO:0000323,GO:0000324,GO:0000329,GO:0003674,GO:0003824,GO:0005215,GO:0005488,GO:0005524,GO:0005575,GO:0005622,GO:0005623,GO:0005737,GO:0005773,GO:0005774,GO:0006810,GO:0006811,GO:0006812,GO:0006873,GO:0006885,GO:0007035,GO:0008144,GO:0008150,GO:0008324,GO:0009987,GO:0015075,GO:0015077,GO:0015078,GO:0015318,GO:0015399,GO:0015405,GO:0015672,GO:0015988,GO:0015991,GO:…	ko:K01046,ko:K02152	ko00190,ko00561,ko01100,ko04145,ko04150,ko04721,ko04966,ko05110,ko05120,ko05323,map00190,map00561,map01100,map04145,map04150,map04721,map04966,map05110,map05120,map05323	V-ATPase_G	OTHER	1	0	NA	NA	NA	NA	NA	NA
265885	By matching	By MS/MS	By matching	By MS/MS	By matching	NA	7692700	11874000	4321600	5121800	4860900	0	4152900	4635900	3274600	0	0	0	5217.XP_007000786.1	2.74e-236	678	COG5407@1|root,KOG0721@2759|Eukaryota,38CNP@33154|Opisthokonta,3NVTY@4751|Fungi,3UZN1@5204|Basidiomycota,3VD9W@5234|Tremellales	4751|Fungi	O	Sec63 Brl domain	SEC63	GO:0003674,GO:0005215,GO:0005575,GO:0005622,GO:0005623,GO:0005737,GO:0005739,GO:0005783,GO:0005789,GO:0005791,GO:0006605,GO:0006612,GO:0006613,GO:0006614,GO:0006620,GO:0006810,GO:0006886,GO:0008104,GO:0008150,GO:0008565,GO:0012505,GO:0015031,GO:0015833,GO:0016020,GO:0016021,GO:0030867,GO:0031090,GO:0031204,GO:0031205,GO:0031207,GO:0031224,GO:0031984,GO:0032991,GO:0033036,GO:0033365,GO:0034613,GO:…	ko:K09540	ko03060,ko04141,map03060,map04141	DnaJ,Sec63	OTHER	1	0	NA	NA	NA	NA	NA	NA
273920	By MS/MS	By MS/MS	By MS/MS	By MS/MS	By MS/MS	By MS/MS	13920000	70297000	23037000	60185000	150060000	100560000	5809500	12195000	7645400	7959100	6804100	5938800	5217.XP_007000862.1	1.26999999999859e-314	873	COG0072@1|root,KOG2472@2759|Eukaryota,38BAE@33154|Opisthokonta,3NVJA@4751|Fungi,3UYNC@5204|Basidiomycota,3VENE@5234|Tremellales	4751|Fungi	J	phenylalanyl-tRNA synthetase beta chain	FRS1	GO:0002181,GO:0003674,GO:0003824,GO:0004812,GO:0004826,GO:0005575,GO:0005622,GO:0005623,GO:0005737,GO:0006082,GO:0006139,GO:0006399,GO:0006412,GO:0006418,GO:0006432,GO:0006518,GO:0006520,GO:0006725,GO:0006807,GO:0008150,GO:0008152,GO:0009058,GO:0009059,GO:0009328,GO:0009987,GO:0010467,GO:0016070,GO:0016874,GO:0016875,GO:0019538,GO:0019752,GO:0032991,GO:0034641,GO:0034645,GO:0034660,GO:0043038,GO:…	ko:K01890	ko00970,map00970	B3_4,B5	OTHER	1	0	NA	NA	NA	NA	NA	NA
276872	NA	By matching	By matching	By matching	By MS/MS	NA	0	1819300	1693300	3306700	22289000	0	0	0	0	0	0	0	82508.K1VPA7	1.65e-162	507	29483@1|root,2RB55@2759|Eukaryota,3AXKC@33154|Opisthokonta,3PIRA@4751|Fungi,3V7YF@5204|Basidiomycota,3VFF8@5234|Tremellales	4751|Fungi	-	-	NA	NA	NA	NA	-	OTHER	1	0	NA	NA	NA	NA	NA	NA
276991	NA	NA	By matching	By MS/MS	By MS/MS	By MS/MS	0	0	2476300	0	49251000	53610000	0	0	0	0	0	0	5217.XP_007004526.1	3.4e-247	689	KOG0598@1|root,KOG0598@2759|Eukaryota,38GE3@33154|Opisthokonta,3NVYN@4751|Fungi,3UZHB@5204|Basidiomycota,3VDEX@5234|Tremellales	4751|Fungi	T	Extension to Ser/Thr-type protein kinases	NA	NA	ko:K08793	NA	Pkinase	OTHER	1	0	NA	NA	NA	NA	NA	NA
277198	By MS/MS	By MS/MS	By MS/MS	By MS/MS	By MS/MS	By MS/MS	61993000	131850000	59582000	123960000	236160000	211640000	26730000	34165000	32718000	31460000	20231000	20790000	5217.XP_007004522.1	1.21e-200	566	COG0673@1|root,2QUVQ@2759|Eukaryota,39V77@33154|Opisthokonta,3NXG9@4751|Fungi,3UYK4@5204|Basidiomycota,3VE71@5234|Tremellales	4751|Fungi	S	Putative oxidoreductase C terminal	NA	NA	NA	NA	GFO_IDH_MocA,ox_reductase_C	OTHER	1	2e-06	NA	NA	NA	NA	NA	NA
277648	By MS/MS	By MS/MS	By MS/MS	By MS/MS	By MS/MS	By MS/MS	1117500000	3005700000	1256700000	2793100000	5408200000	3146300000	99911000	150600000	126590000	131250000	103290000	84917000	552467.XP_003196469.1	0	1442	COG0334@1|root,KOG2250@2759|Eukaryota,390UX@33154|Opisthokonta,3NVNH@4751|Fungi,3UZ5W@5204|Basidiomycota,3VEFJ@5234|Tremellales	4751|Fungi	E	NAD( )-dependent glutamate dehydrogenase which degrades glutamate to ammonia and alpha-ketoglutarate	GDH2	GO:0003674,GO:0003824,GO:0004352,GO:0004353,GO:0005575,GO:0005622,GO:0005623,GO:0005737,GO:0005739,GO:0006082,GO:0006103,GO:0006106,GO:0006520,GO:0006536,GO:0006538,GO:0006807,GO:0008150,GO:0008152,GO:0009056,GO:0009063,GO:0009064,GO:0009065,GO:0009987,GO:0016054,GO:0016491,GO:0016638,GO:0016639,GO:0019551,GO:0019752,GO:0043226,GO:0043227,GO:0043229,GO:0043231,GO:0043436,GO:0043648,GO:0043649,GO:…	ko:K15371	ko00220,ko00250,ko00430,ko00910,ko01100,map00220,map00250,map00430,map00910,map01100	Bac_GDH,ELFV_dehydrog	OTHER	1	0	NA	NA	NA	NA	NA	NA
278619	NA	By MS/MS	NA	By MS/MS	By MS/MS	By MS/MS	0	2980900	0	16829000	60720000	11937000	0	0	0	0	9395100	3026000	82508.K1VEX0	1.28e-241	686	KOG3763@1|root,KOG3763@2759|Eukaryota,38G81@33154|Opisthokonta,3NUI3@4751|Fungi,3UZSD@5204|Basidiomycota,3VDE5@5234|Tremellales	4751|Fungi	A	C-terminal domain of vertebrate Tap protein	MEX67	GO:0000054,GO:0000055,GO:0000056,GO:0003674,GO:0003676,GO:0003723,GO:0003729,GO:0005488,GO:0005515,GO:0005575,GO:0005622,GO:0005623,GO:0005634,GO:0005635,GO:0005643,GO:0005654,GO:0005730,GO:0005737,GO:0006403,GO:0006405,GO:0006406,GO:0006611,GO:0006810,GO:0006886,GO:0006913,GO:0008104,GO:0008150,GO:0008152,GO:0010467,GO:0012505,GO:0015031,GO:0015833,GO:0015931,GO:0016020,GO:0016021,GO:0016973,GO:…	ko:K14284	ko03008,ko03013,ko03015,ko05164,ko05168,map03008,map03013,map03015,map05164,map05168	LRR_9,NTF2,TAP_C	OTHER	1	3e-06	NA	NA	NA	NA	NA	NA
280720	NA	NA	NA	By MS/MS	By MS/MS	By matching	0	0	0	0	54065000	3050800	0	0	0	0	0	0	82508.K1VM49	4.58e-164	488	KOG1859@1|root,KOG1259@2759|Eukaryota,38VEQ@33154|Opisthokonta,3Q454@4751|Fungi,3UYTR@5204|Basidiomycota,3VGP4@5234|Tremellales	4751|Fungi	TZ	Leucine rich repeat	NA	NA	NA	NA	LRR_4,LRR_6,LRR_8	OTHER	1	0	NA	NA	NA	NA	NA	NA
281710	By MS/MS	By MS/MS	By MS/MS	By MS/MS	NA	By matching	1203800	12089000	1965800	8081600	0	6521500	0	0	0	0	0	0	82508.K1WFR8	0	988	KOG0598@1|root,KOG0598@2759|Eukaryota,38BVS@33154|Opisthokonta,3NU9W@4751|Fungi,3UZQS@5204|Basidiomycota,3VEDK@5234|Tremellales	4751|Fungi	T	Haspin like kinase domain	YPK2	GO:0000228,GO:0000749,GO:0000785,GO:0000790,GO:0001101,GO:0001932,GO:0001933,GO:0003674,GO:0003824,GO:0004672,GO:0004674,GO:0004857,GO:0004860,GO:0005575,GO:0005622,GO:0005623,GO:0005634,GO:0005694,GO:0005737,GO:0005829,GO:0005886,GO:0005933,GO:0005935,GO:0006464,GO:0006468,GO:0006469,GO:0006629,GO:0006644,GO:0006650,GO:0006793,GO:0006796,GO:0006807,GO:0006950,GO:0007154,GO:0007165,GO:0008150,GO:…	ko:K13303	ko04068,ko04151,map04068,map04151	Pkinase,Pkinase_C	OTHER	1	0	NA	NA	NA	NA	NA	NA
282306	By MS/MS	By MS/MS	By MS/MS	By MS/MS	By MS/MS	By MS/MS	8225300	23685000	11098000	29854000	73437000	38424000	6203900	7799700	0	6769500	7279200	7937900	82508.K1VXF0	2.87e-270	783	COG1774@1|root,KOG4679@2759|Eukaryota,38DT3@33154|Opisthokonta,3NZ40@4751|Fungi,3V0FM@5204|Basidiomycota,3VD4Q@5234|Tremellales	4751|Fungi	S	PSP1 C-terminal conserved region	NA	GO:0000932,GO:0003674,GO:0003676,GO:0003723,GO:0003729,GO:0005488,GO:0005575,GO:0005622,GO:0005623,GO:0005737,GO:0005739,GO:0032991,GO:0035770,GO:0036464,GO:0043226,GO:0043227,GO:0043228,GO:0043229,GO:0043231,GO:0043232,GO:0044424,GO:0044444,GO:0044464,GO:0097159,GO:1901363,GO:1990904	NA	NA	PSP1	OTHER	1	0	NA	NA	NA	NA	NA	NA
283296	By MS/MS	By MS/MS	By MS/MS	By MS/MS	By MS/MS	By MS/MS	140820000	56329000	37179000	135170000	110970000	142650000	65635000	17983000	35837000	93127000	35591000	34642000	NA	NA	NA	NA	NA	NA	NA	NA	NA	NA	NA	NA	OTHER	1	0	NA	NA	NA	NA	NA	NA
283637	By MS/MS	NA	NA	NA	NA	NA	0	0	0	0	0	0	0	0	0	0	0	0	NA	NA	NA	NA	NA	NA	NA	NA	NA	NA	NA	NA	OTHER	1	0	NA	NA	NA	NA	NA	NA
284605	NA	NA	NA	By matching	By MS/MS	By MS/MS	0	0	0	3682500	10006000	3798300	0	0	0	0	0	0	82508.K1VAH8	7.22e-191	551	COG1167@1|root,KOG0634@2759|Eukaryota,38FH8@33154|Opisthokonta,3NU3Z@4751|Fungi,3UZJK@5204|Basidiomycota,3VEJM@5234|Tremellales	4751|Fungi	E	Aminotransferase class I and II	NA	NA	ko:K00838	ko00130,ko00270,ko00300,ko00350,ko00360,ko00380,ko00400,ko00401,ko00950,ko00960,ko01100,ko01110,ko01130,ko01210,ko01230,map00130,map00270,map00300,map00350,map00360,map00380,map00400,map00401,map00950,map00960,map01100,map01110,map01130,map01210,map01230	Aminotran_1_2	OTHER	1	0	NA	NA	NA	NA	NA	NA
285275	By MS/MS	By MS/MS	By MS/MS	By MS/MS	By MS/MS	By MS/MS	105620000	387790000	129110000	320460000	661040000	312490000	21007000	41670000	23733000	31230000	23282000	19853000	82508.K1VMK5	4.33e-108	321	COG1024@1|root,KOG1679@2759|Eukaryota,38CD5@33154|Opisthokonta,3NWFN@4751|Fungi,3VA1D@5204|Basidiomycota,3VGVK@5234|Tremellales	4751|Fungi	I	Belongs to the enoyl-CoA hydratase isomerase family	NA	NA	ko:K05607	ko00280,ko01100,map00280,map01100	ECH_1	OTHER	1	0	NA	NA	NA	NA	NA	NA
288949	NA	NA	By matching	By MS/MS	By MS/MS	By MS/MS	0	0	687750	4242700	7065200	2995500	0	0	0	0	0	0	82508.K1VM94	1.72e-56	202	COG4775@1|root,KOG2602@2759|Eukaryota,38E84@33154|Opisthokonta,3NUW7@4751|Fungi,3UZ5Q@5204|Basidiomycota,3VERU@5234|Tremellales	4751|Fungi	M	Surface antigen	NA	GO:0001401,GO:0005575,GO:0005622,GO:0005623,GO:0005737,GO:0005739,GO:0005740,GO:0005741,GO:0006605,GO:0006626,GO:0006810,GO:0006839,GO:0006886,GO:0006996,GO:0007005,GO:0007006,GO:0008104,GO:0008150,GO:0009987,GO:0015031,GO:0015833,GO:0016020,GO:0016043,GO:0017038,GO:0019867,GO:0031090,GO:0031966,GO:0031967,GO:0031968,GO:0031975,GO:0032991,GO:0033036,GO:0033365,GO:0034613,GO:0042886,GO:0043226,GO:…	ko:K07277	NA	Bac_surface_Ag	OTHER	1	0	NA	NA	NA	NA	NA	NA
289506	NA	NA	NA	By MS/MS	By MS/MS	NA	0	0	0	5008700	42663000	0	0	0	0	0	0	0	NA	NA	NA	NA	NA	NA	NA	NA	NA	NA	NA	NA	SP	0.47189	0.528105	CS pos: 20-21. Pr: 0.3047	NA	NA	NA	NA	NA
290106	By MS/MS	By MS/MS	By MS/MS	By MS/MS	By MS/MS	By matching	8042500	12679000	7846500	10239000	10038000	25111000	6480400	6326300	6490500	0	0	0	5207.AAW41801	2.29e-296	814	COG4948@1|root,2QU7C@2759|Eukaryota,38DY2@33154|Opisthokonta,3NWIZ@4751|Fungi,3UYV7@5204|Basidiomycota,3VDH2@5234|Tremellales	4751|Fungi	M	Mandelate racemase / muconate lactonizing enzyme, C-terminal domain	NA	NA	ko:K18334	ko00051,ko01120,map00051,map01120	MR_MLE_C,MR_MLE_N	OTHER	1	0	NA	NA	NA	NA	NA	NA
291061	NA	By MS/MS	NA	By MS/MS	By MS/MS	NA	0	0	0	2613500	8222600	0	0	0	0	0	0	0	82508.K1VHD1	1.29e-101	301	COG0456@1|root,KOG3138@2759|Eukaryota,39V9I@33154|Opisthokonta,3P5NM@4751|Fungi,3V1MH@5204|Basidiomycota,3VE7X@5234|Tremellales	4751|Fungi	S	N-acetyltransferase NAT13	NAT5	GO:0003674,GO:0003824,GO:0004596,GO:0005575,GO:0005622,GO:0005623,GO:0005737,GO:0006464,GO:0006473,GO:0006474,GO:0006807,GO:0008080,GO:0008150,GO:0008152,GO:0009987,GO:0010467,GO:0016407,GO:0016410,GO:0016740,GO:0016746,GO:0016747,GO:0019538,GO:0031248,GO:0031365,GO:0031414,GO:0031415,GO:0032991,GO:0034212,GO:0036211,GO:0043170,GO:0043412,GO:0043543,GO:0044237,GO:0044238,GO:0044260,GO:0044267,GO:…	ko:K20793	NA	Acetyltransf_1	OTHER	1	1e-06	NA	NA	NA	NA	NA	NA
291654	By MS/MS	By MS/MS	By MS/MS	By MS/MS	By MS/MS	By MS/MS	73092000	34847000	67143000	116780000	262820000	493790000	47464000	0	47842000	53286000	34171000	147770000	202698.XP_007378633.1	3.26e-31	124	2CYWP@1|root,2S6X4@2759|Eukaryota,3A8FG@33154|Opisthokonta,3P76M@4751|Fungi,3V1UD@5204|Basidiomycota,229PR@155619|Agaricomycetes,3H56Y@355688|Agaricomycetes incertae sedis	4751|Fungi	S	Non-catalytic module family expn	NA	NA	NA	NA	Barwin,DPBB_1	SP	0.000232	0.999739	CS pos: 17-18. Pr: 0.9765	NA	NA	NA	NA	NA
291851	By MS/MS	By MS/MS	By MS/MS	By MS/MS	By MS/MS	By MS/MS	16329000	46456000	20104000	63776000	165500000	106840000	5119600	7005900	5854300	6734000	6193500	6737000	82508.K1W7P0	0	1226	COG1525@1|root,KOG2039@2759|Eukaryota,38HTP@33154|Opisthokonta,3NVE3@4751|Fungi,3UZU3@5204|Basidiomycota,3VD0V@5234|Tremellales	4751|Fungi	K	Tudor domain	NA	GO:0003674,GO:0003676,GO:0003723,GO:0003824,GO:0004518,GO:0005488,GO:0005575,GO:0005622,GO:0005623,GO:0005634,GO:0005737,GO:0006139,GO:0006325,GO:0006342,GO:0006355,GO:0006401,GO:0006725,GO:0006807,GO:0006996,GO:0008150,GO:0008152,GO:0009056,GO:0009057,GO:0009889,GO:0009890,GO:0009892,GO:0009987,GO:0010468,GO:0010556,GO:0010558,GO:0010605,GO:0010629,GO:0016043,GO:0016070,GO:0016442,GO:0016458,GO:…	ko:K15979	ko05169,ko05203,map05169,map05203	SNase,TUDOR	OTHER	1	0	NA	NA	NA	NA	NA	NA
292348	By MS/MS	By MS/MS	By MS/MS	By MS/MS	By MS/MS	By MS/MS	128930000	514210000	132910000	332440000	822210000	462500000	25505000	45614000	31939000	34201000	31755000	27583000	82508.K1VRU2	3.5e-251	707	COG0076@1|root,KOG1383@2759|Eukaryota,38HST@33154|Opisthokonta,3NUJY@4751|Fungi,3UZVF@5204|Basidiomycota,3VCSM@5234|Tremellales	4751|Fungi	E	Belongs to the group II decarboxylase family	GAD1	GO:0003674,GO:0003824,GO:0004351,GO:0005575,GO:0005622,GO:0005623,GO:0005737,GO:0006082,GO:0006520,GO:0006536,GO:0006538,GO:0006807,GO:0006950,GO:0006979,GO:0008150,GO:0008152,GO:0009056,GO:0009063,GO:0009064,GO:0009065,GO:0009987,GO:0016054,GO:0016829,GO:0016830,GO:0016831,GO:0019752,GO:0033554,GO:0034599,GO:0042221,GO:0043436,GO:0043648,GO:0043649,GO:0044237,GO:0044238,GO:0044248,GO:0044281,GO:…	ko:K01580	ko00250,ko00410,ko00430,ko00650,ko01100,ko01110,ko01120,ko02024,ko04727,ko04940,map00250,map00410,map00430,map00650,map01100,map01110,map01120,map02024,map04727,map04940	Pyridoxal_deC	OTHER	1	0	NA	NA	NA	NA	NA	NA
296125	NA	NA	NA	By matching	By MS/MS	By MS/MS	0	0	0	4643700	10457000	11059000	0	0	0	0	0	0	65672.G4TS34	4.24e-33	122	COG0454@1|root,2S8FT@2759|Eukaryota,3A9GA@33154|Opisthokonta,3P6UG@4751|Fungi,3V2FP@5204|Basidiomycota,229ZM@155619|Agaricomycetes,3H5JB@355688|Agaricomycetes incertae sedis	4751|Fungi	K	Acetyltransferase (GNAT) domain	NA	NA	NA	NA	Acetyltransf_1,Acetyltransf_10	OTHER	1	0	NA	NA	NA	NA	NA	NA
296620	By MS/MS	By MS/MS	By MS/MS	By MS/MS	By MS/MS	By MS/MS	8974500	21501000	7464600	10013000	33134000	16090000	5788600	8536400	0	2534600	4043500	5121600	82508.K1WCR1	4.01e-175	498	COG0604@1|root,KOG1198@2759|Eukaryota,38G7C@33154|Opisthokonta,3NUXG@4751|Fungi,3UZTY@5204|Basidiomycota	4751|Fungi	C	nad-p-binding protein	NA	NA	NA	NA	ADH_N,ADH_zinc_N	OTHER	1	0	NA	NA	NA	NA	NA	NA
297454	NA	NA	By matching	By matching	By MS/MS	By MS/MS	0	0	468550	13345000	31508000	12713000	0	0	0	4136200	3436100	2734400	NA	NA	NA	NA	NA	NA	NA	NA	NA	NA	NA	NA	OTHER	1	0	NA	NA	NA	NA	NA	NA
298029	By MS/MS	By MS/MS	By MS/MS	NA	NA	NA	7285200	3933000	4055500	0	0	0	4519900	0	2857500	0	0	0	82508.K1VHA0	0	3407	COG0297@1|root,2QSGC@2759|Eukaryota,38EG4@33154|Opisthokonta,3NUIM@4751|Fungi,3V080@5204|Basidiomycota,3VCUF@5234|Tremellales	4751|Fungi	M	Starch synthase catalytic domain	NA	NA	ko:K00749	NA	Alpha-amylase,Glyco_transf_5,Glycos_transf_1	SP	0.019396	0.980572	CS pos: 32-33. Pr: 0.9468	GT	GT5	NA	NA	NA
298029	By MS/MS	By MS/MS	By MS/MS	NA	NA	NA	7285200	3933000	4055500	0	0	0	4519900	0	2857500	0	0	0	82508.K1VHA0	0	3407	COG0297@1|root,2QSGC@2759|Eukaryota,38EG4@33154|Opisthokonta,3NUIM@4751|Fungi,3V080@5204|Basidiomycota,3VCUF@5234|Tremellales	4751|Fungi	M	Starch synthase catalytic domain	NA	NA	ko:K00749	NA	Alpha-amylase,Glyco_transf_5,Glycos_transf_1	SP	0.019396	0.980572	CS pos: 32-33. Pr: 0.9468	GH	GH13	GH13_22	GH13:68.1	GH13*30
298029	By MS/MS	By MS/MS	By MS/MS	NA	NA	NA	7285200	3933000	4055500	0	0	0	4519900	0	2857500	0	0	0	82508.K1VHA0	0	3407	COG0297@1|root,2QSGC@2759|Eukaryota,38EG4@33154|Opisthokonta,3NUIM@4751|Fungi,3V080@5204|Basidiomycota,3VCUF@5234|Tremellales	4751|Fungi	M	Starch synthase catalytic domain	NA	NA	ko:K00749	NA	Alpha-amylase,Glyco_transf_5,Glycos_transf_1	SP	0.019396	0.980572	CS pos: 32-33. Pr: 0.9468	GH	GH13	GH13_22	GH13:67.2	GH13*27
298056	NA	NA	NA	NA	By MS/MS	NA	0	0	0	0	0	0	0	0	0	0	0	0	82508.K1VYW1	2.02e-201	590	29J2D@1|root,2RSAF@2759|Eukaryota,38V7H@33154|Opisthokonta,3Q0CP@4751|Fungi,3V8DR@5204|Basidiomycota,3VHEJ@5234|Tremellales	4751|Fungi	S	Fungal specific transcription factor domain	NA	NA	NA	NA	Fungal_trans_2,Zn_clus	OTHER	1	0	NA	NA	NA	NA	NA	NA
299177	By MS/MS	By MS/MS	By MS/MS	By MS/MS	By MS/MS	By MS/MS	175540000	310420000	196760000	761900000	900050000	605630000	68323000	77557000	80557000	140300000	81565000	72308000	NA	NA	NA	NA	NA	NA	NA	NA	NA	NA	NA	NA	OTHER	1	0	NA	NA	NA	NA	NA	NA
299492	NA	NA	NA	By matching	By MS/MS	By MS/MS	0	0	0	997530	1617400	1057700	0	0	0	0	0	0	NA	NA	NA	NA	NA	NA	NA	NA	NA	NA	NA	NA	OTHER	1	1e-06	NA	NA	NA	NA	NA	NA
299673	By MS/MS	By MS/MS	By MS/MS	By MS/MS	By MS/MS	By MS/MS	80577000	267060000	59248000	160710000	348180000	213720000	11646000	19120000	14166000	13465000	10986000	8614200	82508.K1V2B9	0	2042	COG0458@1|root,KOG0370@2759|Eukaryota,38GWT@33154|Opisthokonta,3NUIJ@4751|Fungi,3UYAF@5204|Basidiomycota,3VDJA@5234|Tremellales	4751|Fungi	EF	Carbamoyl-phosphate synthetase large chain, oligomerisation domain	CPA2	GO:0000050,GO:0000166,GO:0003674,GO:0003824,GO:0004087,GO:0004088,GO:0005488,GO:0005524,GO:0005575,GO:0005622,GO:0005623,GO:0005737,GO:0005951,GO:0006082,GO:0006139,GO:0006206,GO:0006207,GO:0006520,GO:0006525,GO:0006526,GO:0006725,GO:0006807,GO:0008144,GO:0008150,GO:0008152,GO:0008652,GO:0009058,GO:0009064,GO:0009084,GO:0009112,GO:0009987,GO:0016053,GO:0016874,GO:0016879,GO:0016884,GO:0017076,GO:…	ko:K01955	ko00240,ko00250,ko01100,map00240,map00250,map01100	CPSase_L_D2,CPSase_L_D3	OTHER	1	0	NA	NA	NA	NA	NA	NA
303768	By MS/MS	By MS/MS	By MS/MS	By MS/MS	By MS/MS	By MS/MS	27184000	98590000	27937000	180990000	171200000	152400000	9423600	17769000	9390800	17887000	15973000	17967000	82508.K1VKE5	2.24e-273	763	COG2057@1|root,KOG3822@2759|Eukaryota,38C4R@33154|Opisthokonta,3NXV8@4751|Fungi,3UZT1@5204|Basidiomycota,3VE69@5234|Tremellales	4751|Fungi	H	Key enzyme for ketone body catabolism. Transfers the CoA moiety from succinate to acetoacetate. Formation of the enzyme-CoA intermediate proceeds via an unstable anhydride species formed between the carboxylate groups of the enzyme and substrate	NA	NA	ko:K01027	ko00072,ko00280,ko00650,map00072,map00280,map00650	CoA_trans	OTHER	1	0	NA	NA	NA	NA	NA	NA
306218	By MS/MS	By MS/MS	By MS/MS	By MS/MS	By MS/MS	By MS/MS	151970000	90646000	147050000	253590000	2019800000	4645900000	43569000	15569000	38482000	36004000	89923000	214630000	82508.K1WV28	3e-261	739	COG2273@1|root,2QR13@2759|Eukaryota,38E3H@33154|Opisthokonta,3NUWF@4751|Fungi,3V3IN@5204|Basidiomycota,3VCYK@5234|Tremellales	4751|Fungi	G	Beta-glucan synthesis-associated protein	NA	NA	ko:K21850	NA	SKN1	OTHER	1	2e-06	NA	GH	GH16	NA	GH16:36.2	GH16*4
307152	By MS/MS	By MS/MS	By MS/MS	By MS/MS	By MS/MS	By MS/MS	156240000	427840000	139660000	203770000	628710000	402900000	24547000	35410000	22748000	16562000	25969000	18734000	82508.K1W9Z1	0	1027	COG0138@1|root,KOG2555@2759|Eukaryota,38H8U@33154|Opisthokonta,3NY4C@4751|Fungi,3V011@5204|Basidiomycota,3VDYW@5234|Tremellales	4751|Fungi	F	AICARFT/IMPCHase bienzyme	ADE17	GO:0000003,GO:0003006,GO:0003674,GO:0003824,GO:0003937,GO:0004643,GO:0005575,GO:0005622,GO:0005623,GO:0005737,GO:0005829,GO:0005886,GO:0006091,GO:0006139,GO:0006163,GO:0006164,GO:0006188,GO:0006189,GO:0006725,GO:0006753,GO:0006793,GO:0006796,GO:0006807,GO:0007049,GO:0008150,GO:0008152,GO:0009058,GO:0009060,GO:0009117,GO:0009123,GO:0009124,GO:0009126,GO:0009127,GO:0009150,GO:0009152,GO:0009156,GO:…	ko:K00602	ko00230,ko00670,ko01100,ko01110,ko01130,ko01523,map00230,map00670,map01100,map01110,map01130,map01523	AICARFT_IMPCHas,MGS	OTHER	1	0	NA	NA	NA	NA	NA	NA
307796	NA	NA	By matching	By MS/MS	By MS/MS	By MS/MS	0	0	1222600	14985000	71069000	29908000	0	0	0	0	5745100	4321400	NA	NA	NA	NA	NA	NA	NA	NA	NA	NA	NA	NA	OTHER	1	0	NA	NA	NA	NA	NA	NA
307900	NA	NA	NA	NA	By MS/MS	NA	0	0	0	0	0	0	0	0	0	0	0	0	82508.K1WA09	6.32e-176	499	COG1094@1|root,KOG2874@2759|Eukaryota,38C7I@33154|Opisthokonta,3NTXU@4751|Fungi,3UY3R@5204|Basidiomycota,3VCY2@5234|Tremellales	4751|Fungi	A	Required for 40S ribosome biogenesis. Involved in nucleolar processing of pre-18S ribosomal RNA and ribosome assembly	KRR1	GO:0000447,GO:0000460,GO:0000462,GO:0000466,GO:0000469,GO:0000478,GO:0000479,GO:0003674,GO:0003676,GO:0003723,GO:0005488,GO:0005575,GO:0005622,GO:0005623,GO:0005634,GO:0005730,GO:0006139,GO:0006364,GO:0006396,GO:0006725,GO:0006807,GO:0008150,GO:0008152,GO:0009987,GO:0010467,GO:0016070,GO:0016072,GO:0022613,GO:0030490,GO:0030684,GO:0030686,GO:0031974,GO:0031981,GO:0032040,GO:0032991,GO:0034470,GO:…	ko:K06961	NA	-	OTHER	1	0	NA	NA	NA	NA	NA	NA
320627	By MS/MS	By MS/MS	By MS/MS	By MS/MS	By MS/MS	By MS/MS	6569900	24728000	4639300	0	35794000	11725000	5323400	9777800	0	0	4280800	0	82508.K1VHT9	3.21e-206	611	COG0167@1|root,KOG1436@2759|Eukaryota,38BTB@33154|Opisthokonta,3NXFM@4751|Fungi,3UYIN@5204|Basidiomycota,3VDB5@5234|Tremellales	4751|Fungi	C	Dihydroorotate dehydrogenase, mitochondrial precursor	URA9	GO:0003674,GO:0003824,GO:0004152,GO:0005575,GO:0005622,GO:0005623,GO:0005737,GO:0005739,GO:0005740,GO:0005743,GO:0006139,GO:0006206,GO:0006207,GO:0006213,GO:0006220,GO:0006221,GO:0006222,GO:0006725,GO:0006753,GO:0006793,GO:0006796,GO:0006807,GO:0008150,GO:0008152,GO:0009058,GO:0009112,GO:0009116,GO:0009117,GO:0009119,GO:0009123,GO:0009124,GO:0009129,GO:0009130,GO:0009156,GO:0009161,GO:0009163,GO:…	ko:K00226,ko:K00254	ko00240,ko01100,map00240,map01100	DHO_dh	OTHER	0.999948	6.7e-05	NA	NA	NA	NA	NA	NA
321989	By matching	By MS/MS	NA	NA	By MS/MS	By matching	1847400	9619700	0	0	27426000	4296800	0	3639200	0	0	2900200	0	82508.K1VJ84	5.61e-16	75.5	KOG3801@1|root,KOG3801@2759|Eukaryota,3A8KB@33154|Opisthokonta,3P711@4751|Fungi,3V27J@5204|Basidiomycota,3VG6S@5234|Tremellales	4751|Fungi	A	mitochondrion protein	NA	GO:0005575,GO:0005622,GO:0005623,GO:0005737,GO:0005739,GO:0005740,GO:0005743,GO:0005759,GO:0005829,GO:0006790,GO:0008150,GO:0008152,GO:0009987,GO:0016020,GO:0016043,GO:0016226,GO:0019866,GO:0019898,GO:0022607,GO:0031090,GO:0031163,GO:0031312,GO:0031314,GO:0031966,GO:0031967,GO:0031974,GO:0031975,GO:0032991,GO:0043226,GO:0043227,GO:0043229,GO:0043231,GO:0043233,GO:0044085,GO:0044237,GO:0044422,GO:…	ko:K22069	NA	Complex1_LYR	OTHER	1	0	NA	NA	NA	NA	NA	NA
322097	By MS/MS	By MS/MS	By MS/MS	By MS/MS	By MS/MS	By MS/MS	38437000	35769000	30432000	832010000	3943100000	6702000000	8050900	4073000	6284800	46535000	94917000	243040000	82508.K1WVQ6	7.18e-198	572	COG2303@1|root,KOG1238@2759|Eukaryota,38B4J@33154|Opisthokonta,3NU19@4751|Fungi,3V091@5204|Basidiomycota,3VGTB@5234|Tremellales	4751|Fungi	E	GMC oxidoreductase	NA	NA	NA	NA	GMC_oxred_C,GMC_oxred_N	OTHER	1	3.6e-05	NA	AA	AA3	AA3_2	AA3:202.1	NA
322320	By MS/MS	By MS/MS	By MS/MS	NA	By matching	By matching	102760000	91288000	234160000	0	409500000	220110000	0	0	0	0	0	0	82508.K1V2G3	1.6e-34	120	COG5648@1|root,KOG0381@2759|Eukaryota,3A6QT@33154|Opisthokonta,3P5CR@4751|Fungi,3V1M3@5204|Basidiomycota,3VG2Q@5234|Tremellales	4751|Fungi	K	HMG-box domain	NHP6	GO:0000228,GO:0000785,GO:0000790,GO:0001192,GO:0001195,GO:0003674,GO:0003676,GO:0003677,GO:0003682,GO:0005488,GO:0005575,GO:0005622,GO:0005623,GO:0005634,GO:0005694,GO:0006139,GO:0006259,GO:0006281,GO:0006298,GO:0006323,GO:0006325,GO:0006333,GO:0006334,GO:0006338,GO:0006351,GO:0006352,GO:0006354,GO:0006355,GO:0006357,GO:0006366,GO:0006367,GO:0006383,GO:0006384,GO:0006385,GO:0006725,GO:0006807,GO:…	NA	NA	HMG_box	OTHER	1	0	NA	NA	NA	NA	NA	NA
322770	By MS/MS	By MS/MS	By MS/MS	By MS/MS	By MS/MS	By MS/MS	18833000	55058000	27634000	12130000	147440000	90635000	12329000	21664000	19214000	0	21517000	18312000	5286.M7XM82	1.71e-21	87	COG2058@1|root,KOG1762@2759|Eukaryota,3A5NZ@33154|Opisthokonta,3P5HS@4751|Fungi,3V24P@5204|Basidiomycota,2YETA@29000|Pucciniomycotina	4751|Fungi	J	60s Acidic ribosomal protein	NA	GO:0001932,GO:0001934,GO:0002181,GO:0002182,GO:0003674,GO:0003735,GO:0005198,GO:0005575,GO:0005622,GO:0005623,GO:0005737,GO:0005829,GO:0005840,GO:0006412,GO:0006414,GO:0006518,GO:0006807,GO:0008047,GO:0008150,GO:0008152,GO:0009058,GO:0009059,GO:0009893,GO:0009987,GO:0010467,GO:0010562,GO:0010604,GO:0015934,GO:0019207,GO:0019209,GO:0019220,GO:0019222,GO:0019538,GO:0019887,GO:0022625,GO:0022626,GO:…	ko:K02942	ko03010,map03010	Ribosomal_60s	OTHER	1	0	NA	NA	NA	NA	NA	NA
324043	NA	NA	NA	NA	By MS/MS	By MS/MS	0	0	0	0	13318000	14641000	0	0	0	0	0	0	5207.AAW43215	2.59e-70	219	COG5054@1|root,KOG3355@2759|Eukaryota,3A3X7@33154|Opisthokonta,3P2I1@4751|Fungi,3V1JW@5204|Basidiomycota,3VFEF@5234|Tremellales	4751|Fungi	O	Erv1 / Alr family	ERV1	GO:0000166,GO:0003674,GO:0003756,GO:0003824,GO:0005488,GO:0005575,GO:0005622,GO:0005623,GO:0005737,GO:0005739,GO:0005740,GO:0005758,GO:0006605,GO:0006626,GO:0006810,GO:0006839,GO:0006873,GO:0006875,GO:0006879,GO:0006886,GO:0006950,GO:0006979,GO:0006996,GO:0007005,GO:0008104,GO:0008150,GO:0008152,GO:0009987,GO:0015031,GO:0015035,GO:0015036,GO:0015833,GO:0016043,GO:0016491,GO:0016667,GO:0016670,GO:…	ko:K17783,ko:K18182	ko04714,map04714	Evr1_Alr	OTHER	1	0	NA	NA	NA	NA	NA	NA
324673	By MS/MS	By MS/MS	By MS/MS	By MS/MS	By MS/MS	By MS/MS	3219900	16101000	8591000	25376000	101620000	24560000	2371100	3667700	3361500	6905900	8236400	3332400	1048829.XP_002795760.1	1.05e-70	217	COG5171@1|root,KOG0864@2759|Eukaryota,38EUB@33154|Opisthokonta,3NYZB@4751|Fungi,3QNTH@4890|Ascomycota,20D2B@147545|Eurotiomycetes,3AZQZ@33183|Onygenales,3FNPK@34383|Onygenales incertae sedis	4751|Fungi	U	Ran-specific GTPase-activating protein	sbp1	GO:0000082,GO:0000166,GO:0000226,GO:0000278,GO:0001882,GO:0001883,GO:0003674,GO:0005488,GO:0005515,GO:0005525,GO:0005575,GO:0005622,GO:0005623,GO:0005634,GO:0005737,GO:0005829,GO:0006403,GO:0006405,GO:0006508,GO:0006511,GO:0006606,GO:0006807,GO:0006810,GO:0006886,GO:0006913,GO:0006996,GO:0007010,GO:0007017,GO:0007049,GO:0007051,GO:0007154,GO:0007165,GO:0007264,GO:0007265,GO:0008104,GO:0008150,GO:…	ko:K15306	ko05166,ko05203,map05166,map05203	Ran_BP1	OTHER	1	0	NA	NA	NA	NA	NA	NA
324787	By MS/MS	By MS/MS	By MS/MS	By MS/MS	By MS/MS	By MS/MS	31325000	106420000	42087000	164150000	202850000	81411000	26363000	41110000	34793000	0	36384000	22258000	82508.K1WJ14	3.46e-71	217	KOG4075@1|root,KOG4075@2759|Eukaryota,3A1S5@33154|Opisthokonta,3P5Q4@4751|Fungi,3V1N9@5204|Basidiomycota,3VFP8@5234|Tremellales	4751|Fungi	C	Cytochrome c oxidase subunit IV	cox5	GO:0003674,GO:0003824,GO:0004129,GO:0005215,GO:0005575,GO:0005622,GO:0005623,GO:0005737,GO:0005739,GO:0005740,GO:0005743,GO:0005746,GO:0005751,GO:0006091,GO:0006119,GO:0006123,GO:0006139,GO:0006163,GO:0006725,GO:0006753,GO:0006793,GO:0006796,GO:0006807,GO:0006810,GO:0006811,GO:0006812,GO:0008150,GO:0008152,GO:0008324,GO:0009055,GO:0009060,GO:0009117,GO:0009123,GO:0009126,GO:0009141,GO:0009144,GO:…	ko:K02263	ko00190,ko01100,ko04260,ko04714,ko04932,ko05010,ko05012,ko05016,map00190,map01100,map04260,map04714,map04932,map05010,map05012,map05016	COX4	OTHER	1	4e-06	NA	NA	NA	NA	NA	NA
325384	By MS/MS	By MS/MS	By MS/MS	By MS/MS	By MS/MS	By matching	3016800	15640000	9585900	14238000	24706000	6907500	0	5620900	3530700	2757200	3425600	0	82508.K1VN21	1.1e-199	574	COG0318@1|root,KOG1176@2759|Eukaryota,38D90@33154|Opisthokonta,3NWZC@4751|Fungi,3UY3B@5204|Basidiomycota,3VD2K@5234|Tremellales	4751|Fungi	I	AMP-binding enzyme C-terminal domain	NA	NA	NA	NA	AMP-binding,AMP-binding_C	OTHER	1	0	NA	NA	NA	NA	NA	NA
325387	By matching	By MS/MS	NA	By MS/MS	By matching	By matching	2065900	19115000	0	9297300	12502000	4894600	0	5369900	0	2576700	0	0	82508.K1VSI3	3.86e-146	444	COG1012@1|root,KOG2450@2759|Eukaryota,38X5S@33154|Opisthokonta,3NV07@4751|Fungi,3UZ3F@5204|Basidiomycota,3VGVV@5234|Tremellales	4751|Fungi	E	Belongs to the aldehyde dehydrogenase family	NA	NA	NA	NA	Aldedh	OTHER	0.999636	0.000378	NA	NA	NA	NA	NA	NA
325754	NA	By MS/MS	By matching	By MS/MS	By MS/MS	By matching	0	9227500	2009700	4133000	37519000	1429600	0	0	0	0	0	0	5207.AAW43897	0	1524	COG5219@1|root,KOG0803@2759|Eukaryota,38G7I@33154|Opisthokonta,3NVQV@4751|Fungi,3UZ3H@5204|Basidiomycota,3VGNX@5234|Tremellales	4751|Fungi	O	Ring finger domain	NA	GO:0003674,GO:0003824,GO:0004842,GO:0005488,GO:0005575,GO:0005622,GO:0005623,GO:0005634,GO:0006325,GO:0006342,GO:0006348,GO:0006355,GO:0006412,GO:0006414,GO:0006417,GO:0006464,GO:0006508,GO:0006511,GO:0006518,GO:0006807,GO:0006996,GO:0008150,GO:0008152,GO:0008270,GO:0009056,GO:0009057,GO:0009058,GO:0009059,GO:0009889,GO:0009890,GO:0009892,GO:0009987,GO:0010467,GO:0010468,GO:0010498,GO:0010556,GO:…	ko:K00507,ko:K22377	ko01040,ko01212,ko03320,ko04152,ko04212,map01040,map01212,map03320,map04152,map04212	zf-RING_2	OTHER	1	0	NA	NA	NA	NA	NA	NA
326044	By MS/MS	By MS/MS	By MS/MS	By MS/MS	By MS/MS	By MS/MS	17512000	52590000	16605000	67289000	165780000	131020000	10183000	9446500	9728100	10298000	11978000	12308000	5207.AAW42374	1.68e-133	391	COG0448@1|root,KOG1504@2759|Eukaryota,38CHJ@33154|Opisthokonta,3NVQB@4751|Fungi,3UZ41@5204|Basidiomycota,3VDGJ@5234|Tremellales	4751|Fungi	E	Aspartate/ornithine carbamoyltransferase, Asp/Orn binding domain	ARG3	GO:0000050,GO:0003674,GO:0003824,GO:0004585,GO:0005575,GO:0005622,GO:0005623,GO:0005737,GO:0005739,GO:0005759,GO:0005829,GO:0006082,GO:0006520,GO:0006525,GO:0006526,GO:0006591,GO:0006807,GO:0008150,GO:0008152,GO:0008652,GO:0009058,GO:0009064,GO:0009084,GO:0009987,GO:0016053,GO:0016740,GO:0016741,GO:0016743,GO:0019627,GO:0019752,GO:0031974,GO:0034641,GO:0042450,GO:0043226,GO:0043227,GO:0043229,GO:…	ko:K00611	ko00220,ko01100,ko01110,ko01130,ko01230,map00220,map01100,map01110,map01130,map01230	OTCace,OTCace_N	OTHER	1	1e-06	NA	NA	NA	NA	NA	NA
326378	By MS/MS	By MS/MS	By MS/MS	By MS/MS	By MS/MS	By MS/MS	10011000	37091000	7850000	24991000	13677000000	81659000	192360000	354920000	254000000	593290000	961130000	557350000	82508.K1VCU4	2e-116	356	COG5648@1|root,KOG0381@2759|Eukaryota,3A3AF@33154|Opisthokonta,3P2SE@4751|Fungi,3V121@5204|Basidiomycota,3VGBW@5234|Tremellales	4751|Fungi	B	HMG-box domain	NA	NA	ko:K11296	NA	HMG_box,HMG_box_2	OTHER	1	0	NA	NA	NA	NA	NA	NA
328077	By MS/MS	By MS/MS	By MS/MS	By MS/MS	By MS/MS	By MS/MS	264020000	709610000	147550000	18945000	225790000	164060000	212350000	343960000	122960000	0	35494000	33012000	40483.S8E8S0	1.67e-47	166	COG5524@1|root,2RWTP@2759|Eukaryota,39QVV@33154|Opisthokonta,3Q6WF@4751|Fungi,3V74T@5204|Basidiomycota,225SG@155619|Agaricomycetes,3H4TA@355688|Agaricomycetes incertae sedis	4751|Fungi	S	Bacteriorhodopsin-like protein	NA	GO:0005575,GO:0005622,GO:0005623,GO:0005737,GO:0005783,GO:0005886,GO:0008150,GO:0012505,GO:0016020,GO:0016021,GO:0031224,GO:0032780,GO:0043086,GO:0043226,GO:0043227,GO:0043229,GO:0043231,GO:0043462,GO:0044092,GO:0044424,GO:0044425,GO:0044444,GO:0044464,GO:0050790,GO:0051336,GO:0051346,GO:0065007,GO:0065009,GO:0071944	NA	NA	Bac_rhodopsin	OTHER	1	1e-06	NA	NA	NA	NA	NA	NA
328252	By MS/MS	By MS/MS	By MS/MS	By MS/MS	By MS/MS	By MS/MS	658040000	379860000	571410000	2370000000	13787000000	22959000000	212300000	50212000	152500000	184240000	1224500000	2511500000	552467.XP_003192994.1	1.57e-165	475	299WK@1|root,2RGZ1@2759|Eukaryota,39JPT@33154|Opisthokonta,3Q41Q@4751|Fungi,3V02D@5204|Basidiomycota,3VHJC@5234|Tremellales	4751|Fungi	G	glycoside hydrolase family 16 protein	NA	NA	NA	NA	Glyco_hydro_16	OTHER	1	3e-06	NA	GH	GH16	NA	GH16:2.4	GH16*13
328828	NA	NA	NA	NA	By MS/MS	NA	0	0	0	0	4377600	0	0	0	0	0	0	0	82508.K1VS83	1.47e-86	263	KOG3152@1|root,KOG3152@2759|Eukaryota,39U4I@33154|Opisthokonta,3NZ3E@4751|Fungi,3V14Y@5204|Basidiomycota,3VF00@5234|Tremellales	4751|Fungi	A	pre-rrna-processing protein esf2	ESF2	GO:0000028,GO:0000447,GO:0000460,GO:0000462,GO:0000466,GO:0000469,GO:0000472,GO:0000478,GO:0000479,GO:0000480,GO:0000966,GO:0000967,GO:0001671,GO:0003674,GO:0003676,GO:0003723,GO:0005488,GO:0005575,GO:0005622,GO:0005623,GO:0005634,GO:0005730,GO:0005737,GO:0006139,GO:0006364,GO:0006396,GO:0006725,GO:0006807,GO:0006996,GO:0008047,GO:0008150,GO:0008152,GO:0009987,GO:0010467,GO:0016043,GO:0016070,GO:…	ko:K14785	NA	RRM_1	OTHER	1	0	NA	NA	NA	NA	NA	NA
330198	By MS/MS	By MS/MS	By MS/MS	By MS/MS	By MS/MS	By MS/MS	73778000	75498000	102960000	5451900	69778000	51146000	62615000	34777000	87096000	0	10538000	11370000	148960.XP_006956699.1	2.01e-12	65.1	2CYWP@1|root,2S6X4@2759|Eukaryota,3A8FG@33154|Opisthokonta,3P76M@4751|Fungi,3V1UD@5204|Basidiomycota	4751|Fungi	S	Non-catalytic module family expn	NA	NA	NA	NA	DPBB_1	OTHER	0.999932	0.00013	NA	NA	NA	NA	NA	NA
330729	By MS/MS	By MS/MS	By MS/MS	By MS/MS	By MS/MS	By MS/MS	105050000	38129000	73697000	61311000	219640000	213470000	53473000	12426000	43089000	16353000	22458000	23888000	97096.XP_007797510.1	3.53e-69	221	29X3U@1|root,2RXR0@2759|Eukaryota,3A0Y7@33154|Opisthokonta,3P22G@4751|Fungi,3R10M@4890|Ascomycota,217GG@147550|Sordariomycetes	4751|Fungi	O	Glycosyl hydrolase catalytic core	NA	NA	NA	NA	Glyco_hydro_cc	OTHER	1	2e-06	NA	GH	GH128	NA	NA	GH128*11
331377	NA	By MS/MS	NA	By MS/MS	By MS/MS	By MS/MS	0	2186400	0	6004200	11735000	7084100	0	0	0	0	0	0	82508.K1VSM4	6.07e-67	209	KOG4747@1|root,KOG4747@2759|Eukaryota,3A5QI@33154|Opisthokonta,3P5HM@4751|Fungi,3V1NQ@5204|Basidiomycota,3VFMB@5234|Tremellales	4751|Fungi	T	Histidine Phosphotransfer domain	YPD1	GO:0000160,GO:0001932,GO:0001934,GO:0003674,GO:0003824,GO:0004672,GO:0005488,GO:0005515,GO:0005575,GO:0005622,GO:0005623,GO:0005634,GO:0005737,GO:0005829,GO:0006464,GO:0006468,GO:0006793,GO:0006796,GO:0006807,GO:0006950,GO:0006970,GO:0006979,GO:0007154,GO:0007165,GO:0007231,GO:0007234,GO:0007346,GO:0008150,GO:0008152,GO:0009628,GO:0009893,GO:0009927,GO:0009966,GO:0009967,GO:0009987,GO:0010389,GO:…	ko:K11232	ko02020,ko04011,map02020,map04011	Hpt	OTHER	1	1.1e-05	NA	NA	NA	NA	NA	NA
331847	NA	NA	NA	NA	By MS/MS	NA	0	0	0	0	14357000	0	0	0	0	0	0	0	NA	NA	NA	NA	NA	NA	NA	NA	NA	NA	NA	NA	OTHER	1	0	NA	NA	NA	NA	NA	NA
332357	By MS/MS	By MS/MS	By MS/MS	By MS/MS	By MS/MS	By MS/MS	2316200000	2100400000	1964500000	5534000000	16630000000	27255000000	505070000	225730000	450410000	470960000	735110000	1800700000	82508.K1VWX9	4.12e-130	392	KOG1339@1|root,KOG1339@2759|Eukaryota,3A19X@33154|Opisthokonta,3NX73@4751|Fungi,3UZ6D@5204|Basidiomycota,3VE68@5234|Tremellales	4751|Fungi	O	Belongs to the peptidase A1 family	NA	NA	ko:K01381	ko04138,map04138	Asp	OTHER	1	3e-05	NA	NA	NA	NA	NA	NA
332565	NA	By MS/MS	NA	NA	NA	NA	0	3714900	0	0	0	0	0	0	0	0	0	0	82508.K1WTL6	9.1e-78	246	28PJ5@1|root,2QW7A@2759|Eukaryota,39TEF@33154|Opisthokonta,3NYIA@4751|Fungi,3V13S@5204|Basidiomycota,3VF8E@5234|Tremellales	4751|Fungi	U	Plasma membrane osmosensor that activates the high osmolarity glycerol (HOG) MAPK signaling pathway in response to high osmolarity	SHO1	GO:0000902,GO:0001402,GO:0001932,GO:0001934,GO:0003674,GO:0004888,GO:0005034,GO:0005078,GO:0005198,GO:0005488,GO:0005515,GO:0005575,GO:0005622,GO:0005623,GO:0005737,GO:0005783,GO:0005886,GO:0005933,GO:0005935,GO:0005937,GO:0006950,GO:0006970,GO:0006979,GO:0007154,GO:0007163,GO:0007165,GO:0007231,GO:0007232,GO:0008064,GO:0008150,GO:0009266,GO:0009268,GO:0009272,GO:0009408,GO:0009607,GO:0009628,GO:…	ko:K11246	ko04011,map04011	SH3_1,SH3_9	OTHER	1	2e-06	NA	NA	NA	NA	NA	NA
332624	NA	NA	NA	By matching	By MS/MS	By MS/MS	0	0	0	6314900	37874000	19610000	0	0	0	0	0	0	552467.XP_003192105.1	0	926	COG2234@1|root,KOG2195@2759|Eukaryota,38ERK@33154|Opisthokonta,3NUU3@4751|Fungi,3UZ3W@5204|Basidiomycota,3VE0S@5234|Tremellales	4751|Fungi	OP	Transferrin receptor-like dimerisation domain	VPS70	GO:0005575,GO:0005622,GO:0005623,GO:0005737,GO:0005783,GO:0006605,GO:0006623,GO:0006810,GO:0006886,GO:0007034,GO:0008104,GO:0008150,GO:0012505,GO:0015031,GO:0015833,GO:0033036,GO:0033365,GO:0034613,GO:0042886,GO:0043226,GO:0043227,GO:0043229,GO:0043231,GO:0044424,GO:0044444,GO:0044464,GO:0045184,GO:0046907,GO:0051179,GO:0051234,GO:0051641,GO:0051649,GO:0070727,GO:0071702,GO:0071705,GO:0072594,GO:…	ko:K01301	NA	PA,Peptidase_M28,TFR_dimer	OTHER	1	0	NA	NA	NA	NA	NA	NA
332652	By matching	By matching	By matching	By MS/MS	By MS/MS	By MS/MS	4202600	1244700	1095500	29756000	73799000	52862000	3602700	0	0	9570200	8280500	5352800	552467.XP_003192222.1	3.87e-38	130	COG0199@1|root,KOG1741@2759|Eukaryota,3A3IW@33154|Opisthokonta,3P4CP@4751|Fungi,3V1SI@5204|Basidiomycota,3VH2Z@5234|Tremellales	4751|Fungi	J	Ribosomal protein S14p/S29e	MRP2	GO:0000313,GO:0000314,GO:0003674,GO:0003735,GO:0005198,GO:0005575,GO:0005622,GO:0005623,GO:0005737,GO:0005739,GO:0005759,GO:0005761,GO:0005763,GO:0005840,GO:0006412,GO:0006518,GO:0006807,GO:0008150,GO:0008152,GO:0009058,GO:0009059,GO:0009987,GO:0010467,GO:0015935,GO:0019538,GO:0031974,GO:0032543,GO:0032991,GO:0034641,GO:0034645,GO:0043043,GO:0043170,GO:0043226,GO:0043227,GO:0043228,GO:0043229,GO:…	ko:K02954	ko03010,map03010	Ribosomal_S14	OTHER	1	0	NA	NA	NA	NA	NA	NA
332677	By MS/MS	By MS/MS	By MS/MS	By MS/MS	By MS/MS	By MS/MS	45184000	86909000	25726000	38916000	188620000	182690000	8521500	12122000	6815400	9050900	7532100	8870800	82508.K1VUQ3	0	1019	COG0129@1|root,KOG2448@2759|Eukaryota,38F28@33154|Opisthokonta,3NUBR@4751|Fungi,3UYUV@5204|Basidiomycota,3VEU4@5234|Tremellales	4751|Fungi	E	Dehydratase family	ILV3	GO:0003674,GO:0003824,GO:0004160,GO:0005575,GO:0005622,GO:0005623,GO:0005737,GO:0005739,GO:0006082,GO:0006520,GO:0006549,GO:0006551,GO:0006573,GO:0006807,GO:0008150,GO:0008152,GO:0008652,GO:0009058,GO:0009081,GO:0009082,GO:0009097,GO:0009099,GO:0009987,GO:0016053,GO:0016829,GO:0016835,GO:0016836,GO:0019752,GO:0043226,GO:0043227,GO:0043229,GO:0043231,GO:0043436,GO:0044237,GO:0044238,GO:0044249,GO:…	ko:K01687	ko00290,ko00770,ko01100,ko01110,ko01130,ko01210,ko01230,map00290,map00770,map01100,map01110,map01130,map01210,map01230	ILVD_EDD	OTHER	1	0	NA	NA	NA	NA	NA	NA
332863	By matching	By MS/MS	By MS/MS	By MS/MS	By MS/MS	By matching	3596200	19871000	9665600	20708000	42658000	12170000	0	6735400	0	8348900	4654800	0	82508.K1VBI7	0	1287	COG5308@1|root,KOG1900@2759|Eukaryota,38TTX@33154|Opisthokonta,3NU2K@4751|Fungi,3UYDG@5204|Basidiomycota,3VD1Z@5234|Tremellales	4751|Fungi	UY	Nup133 N terminal like	NUP170	GO:0000972,GO:0000973,GO:0003674,GO:0003676,GO:0003677,GO:0003682,GO:0003723,GO:0005198,GO:0005488,GO:0005575,GO:0005622,GO:0005623,GO:0005634,GO:0005635,GO:0005643,GO:0006323,GO:0006325,GO:0006333,GO:0006338,GO:0006342,GO:0006355,GO:0006403,GO:0006405,GO:0006407,GO:0006606,GO:0006611,GO:0006810,GO:0006886,GO:0006913,GO:0006996,GO:0006997,GO:0006999,GO:0007059,GO:0008104,GO:0008150,GO:0009889,GO:…	ko:K14312	ko03013,map03013	Nucleoporin_C,Nucleoporin_N	OTHER	0.976122	0.023913	NA	NA	NA	NA	NA	NA
333075	By MS/MS	By MS/MS	NA	NA	NA	NA	4834400	2925400	0	0	0	0	0	0	0	0	0	0	NA	NA	NA	NA	NA	NA	NA	NA	NA	NA	NA	NA	OTHER	0.999916	8.1e-05	NA	NA	NA	NA	NA	NA
333259	NA	By MS/MS	NA	NA	By MS/MS	NA	0	4988700	0	0	4004000	0	0	0	0	0	0	0	82508.K1V475	0	1679	COG1643@1|root,KOG0920@2759|Eukaryota,38B5Q@33154|Opisthokonta,3NWAW@4751|Fungi,3UYA0@5204|Basidiomycota,3VD5D@5234|Tremellales	4751|Fungi	A	Helicase associated domain (HA2) Add an annotation	NA	NA	ko:K02974,ko:K13184	ko03010,map03010	DEAD,HA2,Helicase_C,OB_NTP_bind,dsrm	OTHER	1	1e-06	NA	NA	NA	NA	NA	NA
333264	NA	By MS/MS	NA	NA	By MS/MS	By MS/MS	0	3582000	0	0	15789000	3686600	0	0	0	0	0	0	82508.K1VF18	2.47e-216	615	KOG1416@1|root,KOG1416@2759|Eukaryota,39QJG@33154|Opisthokonta,3NU3W@4751|Fungi,3UYE3@5204|Basidiomycota,3VGE9@5234|Tremellales	4751|Fungi	J	Gcd10p family	TRM6	GO:0000049,GO:0001510,GO:0003674,GO:0003676,GO:0003723,GO:0005488,GO:0005575,GO:0005622,GO:0005623,GO:0005634,GO:0005737,GO:0006139,GO:0006396,GO:0006399,GO:0006400,GO:0006725,GO:0006807,GO:0008033,GO:0008150,GO:0008152,GO:0009451,GO:0009987,GO:0010467,GO:0016070,GO:0030488,GO:0031515,GO:0032259,GO:0032991,GO:0034470,GO:0034641,GO:0034660,GO:0034708,GO:0043170,GO:0043226,GO:0043227,GO:0043229,GO:…	ko:K03256	NA	Gcd10p	OTHER	1	0	NA	NA	NA	NA	NA	NA
333270	By MS/MS	By MS/MS	By MS/MS	NA	By matching	NA	1708000	7417300	2360800	0	8323300	0	0	0	0	0	0	0	82508.K1VY75	2.48e-296	823	COG1252@1|root,KOG2495@2759|Eukaryota,38G4F@33154|Opisthokonta,3NTXJ@4751|Fungi,3UZNH@5204|Basidiomycota,3VDBA@5234|Tremellales	4751|Fungi	C	Pyridine nucleotide-disulphide oxidoreductase	NDE1	GO:0001300,GO:0003674,GO:0003824,GO:0003954,GO:0005575,GO:0005622,GO:0005623,GO:0005737,GO:0005739,GO:0005740,GO:0005743,GO:0005975,GO:0005996,GO:0006006,GO:0006066,GO:0006067,GO:0006082,GO:0006090,GO:0006091,GO:0006113,GO:0006116,GO:0006119,GO:0006139,GO:0006163,GO:0006725,GO:0006732,GO:0006733,GO:0006734,GO:0006753,GO:0006793,GO:0006796,GO:0006807,GO:0007568,GO:0007569,GO:0008137,GO:0008150,GO:…	ko:K17871	NA	Pyr_redox_2	OTHER	0.99998	5.4e-05	NA	NA	NA	NA	NA	NA
333358	By MS/MS	By MS/MS	By MS/MS	By MS/MS	By MS/MS	By MS/MS	13380000	37731000	12782000	15343000	56013000	41811000	5761300	8674000	5239700	4878600	4409400	5036900	82508.K1V9F0	4.06e-237	696	COG0436@1|root,COG0667@1|root,KOG0257@2759|Eukaryota,KOG1575@2759|Eukaryota,38BZ0@33154|Opisthokonta,3NVUU@4751|Fungi,3UZQD@5204|Basidiomycota,3VD3G@5234|Tremellales	4751|Fungi	E	Aminotransferase class I and II	BNA3	GO:0003674,GO:0003824,GO:0005575,GO:0005622,GO:0005623,GO:0005737,GO:0005739,GO:0006082,GO:0006520,GO:0006725,GO:0006807,GO:0008150,GO:0008152,GO:0008483,GO:0009058,GO:0009987,GO:0016053,GO:0016212,GO:0016740,GO:0016769,GO:0017144,GO:0018130,GO:0019438,GO:0019752,GO:0032787,GO:0034275,GO:0034276,GO:0036137,GO:0042180,GO:0042537,GO:0043226,GO:0043227,GO:0043229,GO:0043231,GO:0043436,GO:0044237,GO:…	ko:K14264	ko00380,ko01100,map00380,map01100	Aminotran_1_2	OTHER	1	0	NA	NA	NA	NA	NA	NA
333429	By MS/MS	By MS/MS	By MS/MS	By MS/MS	By MS/MS	By MS/MS	113290000	212210000	131560000	386970000	828380000	581670000	18620000	23487000	24236000	26322000	22365000	24389000	552467.XP_003192809.1	0	880	COG0469@1|root,KOG2323@2759|Eukaryota,38BPM@33154|Opisthokonta,3NUBE@4751|Fungi,3UZ5S@5204|Basidiomycota,3VE7Q@5234|Tremellales	4751|Fungi	G	Pyruvate kinase, barrel domain	PYK1	GO:0003674,GO:0003824,GO:0004743,GO:0005575,GO:0005618,GO:0005622,GO:0005623,GO:0005737,GO:0005739,GO:0005829,GO:0005886,GO:0005975,GO:0005996,GO:0006006,GO:0006007,GO:0006082,GO:0006090,GO:0006091,GO:0006096,GO:0006139,GO:0006163,GO:0006164,GO:0006165,GO:0006725,GO:0006732,GO:0006733,GO:0006734,GO:0006735,GO:0006753,GO:0006754,GO:0006757,GO:0006793,GO:0006796,GO:0006807,GO:0006950,GO:0007154,GO:…	ko:K00873	ko00010,ko00230,ko00620,ko01100,ko01110,ko01120,ko01130,ko01200,ko01230,ko04922,ko04930,ko05165,ko05203,ko05230,map00010,map00230,map00620,map01100,map01110,map01120,map01130,map01200,map01230,map04922,map04930,map05165,map05203,map05230	PK,PK_C	OTHER	1	0	NA	NA	NA	NA	NA	NA
333483	By MS/MS	By MS/MS	By matching	By MS/MS	By MS/MS	By MS/MS	7117700	16861000	4775100	25329000	37500000	38090000	4361600	6601800	0	8565000	3405100	6914600	5207.AAW46350	9.15e-281	789	COG0006@1|root,KOG2413@2759|Eukaryota,38B6V@33154|Opisthokonta,3NU3T@4751|Fungi,3UZMK@5204|Basidiomycota,3VCYE@5234|Tremellales	4751|Fungi	E	Cytoplasm protein	AMPP	GO:0000122,GO:0005575,GO:0005622,GO:0005623,GO:0005737,GO:0005829,GO:0006355,GO:0006357,GO:0008150,GO:0009889,GO:0009890,GO:0009892,GO:0009987,GO:0010035,GO:0010038,GO:0010039,GO:0010468,GO:0010556,GO:0010558,GO:0010605,GO:0010629,GO:0019219,GO:0019222,GO:0031323,GO:0031324,GO:0031326,GO:0031327,GO:0034395,GO:0034396,GO:0042221,GO:0044424,GO:0044444,GO:0044464,GO:0045892,GO:0045934,GO:0048519,GO:…	ko:K01262	NA	Creatinase_N,Creatinase_N_2,Peptidase_M24,Peptidase_M24_C	OTHER	1	0	NA	NA	NA	NA	NA	NA
333615	By MS/MS	By MS/MS	By MS/MS	By MS/MS	By MS/MS	By MS/MS	260430000	683300000	306860000	457880000	1342800000	1424000000	66900000	100820000	84501000	65585000	70577000	90186000	82508.K1VS71	2.88e-225	634	COG3844@1|root,KOG3846@2759|Eukaryota,38BHE@33154|Opisthokonta,3NUB7@4751|Fungi,3UZBB@5204|Basidiomycota,3VEGW@5234|Tremellales	4751|Fungi	E	Catalyzes the cleavage of L-kynurenine (L-Kyn) and L-3- hydroxykynurenine (L-3OHKyn) into anthranilic acid (AA) and 3- hydroxyanthranilic acid (3-OHAA), respectively	BNA5	GO:0003674,GO:0003824,GO:0005575,GO:0005622,GO:0005623,GO:0005634,GO:0005737,GO:0006082,GO:0006139,GO:0006520,GO:0006568,GO:0006569,GO:0006576,GO:0006586,GO:0006725,GO:0006732,GO:0006733,GO:0006753,GO:0006766,GO:0006767,GO:0006793,GO:0006796,GO:0006807,GO:0008150,GO:0008152,GO:0009056,GO:0009058,GO:0009063,GO:0009072,GO:0009074,GO:0009108,GO:0009117,GO:0009165,GO:0009308,GO:0009310,GO:0009435,GO:…	ko:K01556	ko00380,ko01100,map00380,map01100	Aminotran_5	OTHER	1	0	NA	NA	NA	NA	NA	NA
333701	By MS/MS	By MS/MS	By MS/MS	By MS/MS	By MS/MS	By MS/MS	11258000	9483200	14695000	25345000	189920000	14271000	14396000	0	13750000	15639000	23303000	0	5217.XP_007004303.1	2.17e-41	147	KOG3223@1|root,KOG3223@2759|Eukaryota,38EMG@33154|Opisthokonta,3P2NW@4751|Fungi,3V0RK@5204|Basidiomycota,3VF29@5234|Tremellales	4751|Fungi	S	Coiled-coil domain-containing protein 124	NA	GO:0003674,GO:0003712,GO:0003713,GO:0005575,GO:0005622,GO:0005623,GO:0005634,GO:0005737,GO:0006139,GO:0006351,GO:0006366,GO:0006725,GO:0006807,GO:0006950,GO:0006979,GO:0008150,GO:0008152,GO:0009058,GO:0009059,GO:0009889,GO:0009891,GO:0009893,GO:0009987,GO:0010467,GO:0010556,GO:0010557,GO:0010604,GO:0016070,GO:0018130,GO:0019219,GO:0019222,GO:0019438,GO:0031323,GO:0031325,GO:0031326,GO:0031328,GO:…	ko:K02357	NA	Ccdc124	OTHER	1	0	NA	NA	NA	NA	NA	NA
333795	NA	By MS/MS	By MS/MS	NA	By MS/MS	By matching	0	18946000	6179500	0	3423900	9728900	0	0	0	0	0	0	552467.XP_003191452.1	2.07e-167	491	COG0631@1|root,KOG0700@2759|Eukaryota,38DH4@33154|Opisthokonta,3NXCM@4751|Fungi,3UZN3@5204|Basidiomycota,3VGDM@5234|Tremellales	4751|Fungi	T	Protein phosphatase 2C	NA	NA	ko:K01102	NA	PP2C	OTHER	1	0	NA	NA	NA	NA	NA	NA
333932	NA	NA	NA	By matching	By MS/MS	By matching	0	0	0	1978400	9270100	2738300	0	0	0	0	0	0	82508.K1VXK7	0	1886	COG1643@1|root,KOG0922@2759|Eukaryota,38C5G@33154|Opisthokonta,3NVRX@4751|Fungi,3V00F@5204|Basidiomycota,3VDPM@5234|Tremellales	4751|Fungi	A	Helicase associated domain (HA2) Add an annotation	PRP22	GO:0000350,GO:0000375,GO:0000377,GO:0000390,GO:0000393,GO:0000398,GO:0003674,GO:0003676,GO:0003723,GO:0003724,GO:0003824,GO:0004004,GO:0004386,GO:0005488,GO:0005575,GO:0005622,GO:0005623,GO:0005634,GO:0005681,GO:0005684,GO:0005737,GO:0006139,GO:0006396,GO:0006397,GO:0006725,GO:0006807,GO:0008026,GO:0008150,GO:0008152,GO:0008186,GO:0008380,GO:0009987,GO:0010467,GO:0016043,GO:0016070,GO:0016071,GO:…	ko:K12818	ko03040,map03040	AAA_22,DEAD,HA2,Helicase_C,OB_NTP_bind,S1	OTHER	1	0	NA	NA	NA	NA	NA	NA
334060	By MS/MS	By MS/MS	By MS/MS	By MS/MS	By MS/MS	By MS/MS	12995000	47074000	15318000	36405000	72256000	13841000	6103200	10746000	8063700	8257600	7235700	4069000	82508.K1W330	9.33e-173	504	COG5190@1|root,KOG2832@2759|Eukaryota,38DKE@33154|Opisthokonta,3NW4Q@4751|Fungi,3UZ09@5204|Basidiomycota,3VCWD@5234|Tremellales	4751|Fungi	U	catalytic domain of ctd-like phosphatases	TIM50	GO:0003674,GO:0003824,GO:0004721,GO:0005048,GO:0005488,GO:0005575,GO:0005622,GO:0005623,GO:0005737,GO:0005739,GO:0005740,GO:0005743,GO:0005744,GO:0005886,GO:0006464,GO:0006470,GO:0006605,GO:0006626,GO:0006793,GO:0006796,GO:0006807,GO:0006810,GO:0006839,GO:0006886,GO:0006996,GO:0007005,GO:0007006,GO:0008104,GO:0008150,GO:0008152,GO:0009987,GO:0015031,GO:0015833,GO:0016020,GO:0016021,GO:0016043,GO:…	ko:K17496	NA	NIF	OTHER	1	0	NA	NA	NA	NA	NA	NA
334099	By MS/MS	By MS/MS	By MS/MS	By MS/MS	By MS/MS	By MS/MS	47519000	68478000	34211000	47317000	88549000	59358000	12303000	10984000	8554800	8645600	7266300	5431700	5207.AAW46122	3.07e-85	271	28MZB@1|root,2QUI6@2759|Eukaryota,38HPW@33154|Opisthokonta,3NZ44@4751|Fungi,3V0FB@5204|Basidiomycota,3VDPE@5234|Tremellales	4751|Fungi	S	von Willebrand factor (vWF) type A domain	NA	NA	NA	NA	vWA-TerF-like	OTHER	1	2e-06	NA	NA	NA	NA	NA	NA
334106	NA	NA	NA	NA	By MS/MS	NA	0	0	0	0	0	0	0	0	0	0	0	0	5207.AAW40701	9.08e-197	557	COG1537@1|root,KOG2869@2759|Eukaryota,38FIS@33154|Opisthokonta,3NUSJ@4751|Fungi,3UYAG@5204|Basidiomycota,3VGTF@5234|Tremellales	4751|Fungi	J	May function in recognizing stalled ribosomes and triggering endonucleolytic cleavage of the mRNA, a mechanism to release non-functional ribosomes and degrade damaged mRNAs	DOM34	GO:0000956,GO:0002181,GO:0002184,GO:0003674,GO:0003676,GO:0003723,GO:0003747,GO:0003824,GO:0004518,GO:0004519,GO:0004521,GO:0004540,GO:0005488,GO:0005575,GO:0005622,GO:0005623,GO:0005737,GO:0006139,GO:0006401,GO:0006402,GO:0006412,GO:0006415,GO:0006417,GO:0006518,GO:0006725,GO:0006807,GO:0006950,GO:0006986,GO:0006996,GO:0007154,GO:0007165,GO:0008079,GO:0008135,GO:0008150,GO:0008152,GO:0009056,GO:…	ko:K06965	ko03015,map03015	eRF1_1,eRF1_2,eRF1_3	OTHER	0.999934	8.9e-05	NA	NA	NA	NA	NA	NA
334152	By MS/MS	By MS/MS	By MS/MS	By MS/MS	By MS/MS	By MS/MS	17531000	10488000	17705000	21169000	44692000	31939000	10927000	3840500	12986000	7837200	5349900	7028900	5207.AAW43465	1.23e-77	236	COG0386@1|root,KOG1651@2759|Eukaryota,3A1XE@33154|Opisthokonta,3P24F@4751|Fungi,3V104@5204|Basidiomycota,3VFJX@5234|Tremellales	4751|Fungi	O	Glutathione peroxidase	GPX2	GO:0000302,GO:0003674,GO:0003824,GO:0004601,GO:0005575,GO:0005622,GO:0005623,GO:0005737,GO:0005739,GO:0005829,GO:0006950,GO:0006979,GO:0008150,GO:0008152,GO:0008379,GO:0009056,GO:0009636,GO:0009987,GO:0010035,GO:0016209,GO:0016491,GO:0016684,GO:0016999,GO:0017001,GO:0017144,GO:0019725,GO:0033554,GO:0034599,GO:0034614,GO:0035690,GO:0042221,GO:0042493,GO:0042542,GO:0042592,GO:0042737,GO:0042743,GO:…	ko:K00432	ko00480,ko00590,ko04918,map00480,map00590,map04918	GSHPx	OTHER	1	0	NA	NA	NA	NA	NA	NA
334183	By MS/MS	By MS/MS	By MS/MS	By MS/MS	By MS/MS	By MS/MS	1710300000	3603400000	1616300000	4906000000	11080000000	13459000000	152640000	219480000	179810000	298620000	278670000	444660000	82508.K1W4Z9	0	1094	COG0443@1|root,KOG0101@2759|Eukaryota,38BSZ@33154|Opisthokonta,3NVJE@4751|Fungi,3UXZ2@5204|Basidiomycota,3VD8R@5234|Tremellales	4751|Fungi	O	Belongs to the heat shock protein 70 family	SSA2	GO:0000049,GO:0000060,GO:0000166,GO:0000209,GO:0000322,GO:0000323,GO:0000324,GO:0000329,GO:0002181,GO:0002376,GO:0003674,GO:0003676,GO:0003723,GO:0003824,GO:0005488,GO:0005515,GO:0005524,GO:0005575,GO:0005576,GO:0005618,GO:0005622,GO:0005623,GO:0005634,GO:0005681,GO:0005737,GO:0005739,GO:0005773,GO:0005774,GO:0005829,GO:0005844,GO:0005886,GO:0006403,GO:0006404,GO:0006412,GO:0006457,GO:0006464,GO:…	ko:K03283	ko03040,ko04010,ko04141,ko04144,ko04213,ko04612,ko04915,ko05134,ko05145,ko05162,ko05164,ko05169,map03040,map04010,map04141,map04144,map04213,map04612,map04915,map05134,map05145,map05162,map05164,map05169	HSP70	OTHER	1	0	NA	NA	NA	NA	NA	NA
334211	By MS/MS	By MS/MS	By MS/MS	By MS/MS	By MS/MS	By MS/MS	26244000	17930000	27199000	15944000	35815000	28029000	16312000	6802300	17287000	0	4226700	0	5346.XP_001832648.1	1.61e-52	178	2EKAE@1|root,2SQ8M@2759|Eukaryota,3AM0D@33154|Opisthokonta,3PE71@4751|Fungi,3V5DU@5204|Basidiomycota,22D48@155619|Agaricomycetes,3W951@5338|Agaricales	4751|Fungi	O	G-X-X-X-Q-X-W domain-containing protein	NA	NA	NA	NA	Ricin_B_lectin	SP	0.001484	0.998516	CS pos: 18-19. Pr: 0.9143	NA	NA	NA	NA	NA
334244	By MS/MS	By MS/MS	By MS/MS	By MS/MS	By MS/MS	By MS/MS	122540000	313360000	114200000	241200000	875830000	559490000	25597000	33602000	24377000	31644000	30831000	27706000	82508.K1VQN2	0	994	KOG0123@1|root,KOG0123@2759|Eukaryota,38F9F@33154|Opisthokonta,3NXFC@4751|Fungi,3UYGI@5204|Basidiomycota,3VDXF@5234|Tremellales	4751|Fungi	A	Binds the poly(A) tail of mRNA	PAB1	GO:0003674,GO:0003676,GO:0003682,GO:0003723,GO:0003727,GO:0003729,GO:0004857,GO:0005488,GO:0005575,GO:0005622,GO:0005623,GO:0005634,GO:0005681,GO:0005737,GO:0005840,GO:0006403,GO:0006405,GO:0006406,GO:0006417,GO:0006446,GO:0006611,GO:0006810,GO:0006886,GO:0006913,GO:0008104,GO:0008143,GO:0008150,GO:0008152,GO:0008428,GO:0009889,GO:0009894,GO:0010467,GO:0010468,GO:0010494,GO:0010556,GO:0010608,GO:…	ko:K13126	ko03013,ko03015,ko03018,map03013,map03015,map03018	PABP,RRM_1	OTHER	1	7e-06	NA	NA	NA	NA	NA	NA
334354	By MS/MS	By MS/MS	By MS/MS	By MS/MS	By MS/MS	By MS/MS	16547000	73979000	42345000	97159000	189620000	76262000	9338300	13070000	12245000	21718000	18027000	8809900	552467.XP_003197005.1	4.26e-111	330	COG0543@1|root,KOG0534@2759|Eukaryota,38C8B@33154|Opisthokonta,3NVGH@4751|Fungi,3UZTJ@5204|Basidiomycota,3VGRB@5234|Tremellales	4751|Fungi	CH	Oxidoreductase FAD-binding domain	NA	NA	ko:K00326	ko00520,map00520	FAD_binding_6,NAD_binding_1	OTHER	1	1e-06	NA	NA	NA	NA	NA	NA
334468	By MS/MS	By MS/MS	By MS/MS	By matching	By matching	By matching	10325000	9461600	7734100	5063800	7527800	5522300	0	0	0	0	0	0	82508.K1V6V8	0	3084	KOG0916@1|root,KOG0916@2759|Eukaryota,39S3J@33154|Opisthokonta,3NUI9@4751|Fungi,3UYI9@5204|Basidiomycota,3VDHE@5234|Tremellales	4751|Fungi	M	1,3-beta-glucan synthase subunit FKS1	FKS1	GO:0000003,GO:0000148,GO:0000271,GO:0000278,GO:0000281,GO:0000746,GO:0000747,GO:0000910,GO:0000917,GO:0000935,GO:0000936,GO:0003006,GO:0003674,GO:0003824,GO:0003843,GO:0005575,GO:0005618,GO:0005622,GO:0005623,GO:0005628,GO:0005737,GO:0005739,GO:0005794,GO:0005826,GO:0005856,GO:0005886,GO:0005933,GO:0005934,GO:0005935,GO:0005937,GO:0005938,GO:0005975,GO:0005976,GO:0006073,GO:0006074,GO:0006075,GO:…	ko:K00706	ko00500,ko04011,map00500,map04011	FKS1_dom1,Glucan_synthase	OTHER	1	1e-06	NA	GT	GT48	NA	GT48:1.1	GT48*2
334482	NA	NA	NA	NA	By MS/MS	NA	0	0	0	0	1146400	0	0	0	0	0	0	0	82508.K1VPV1	4.27e-235	680	KOG0667@1|root,KOG0671@2759|Eukaryota,38EZY@33154|Opisthokonta,3NUFQ@4751|Fungi,3UYU0@5204|Basidiomycota,3VEFV@5234|Tremellales	4751|Fungi	T	Serine/Threonine protein kinases, catalytic domain	LKH1	GO:0000079,GO:0000429,GO:0000430,GO:0000433,GO:0000920,GO:0001932,GO:0001933,GO:0003674,GO:0003824,GO:0004672,GO:0004674,GO:0004713,GO:0005575,GO:0005622,GO:0005623,GO:0005634,GO:0005737,GO:0006355,GO:0006357,GO:0006359,GO:0006464,GO:0006468,GO:0006469,GO:0006793,GO:0006796,GO:0006807,GO:0006950,GO:0006979,GO:0007154,GO:0007346,GO:0007584,GO:0008150,GO:0008152,GO:0009605,GO:0009889,GO:0009890,GO:…	ko:K08287	NA	Pkinase	OTHER	0.999793	0.000244	NA	NA	NA	NA	NA	NA
334536	NA	By MS/MS	NA	NA	NA	By MS/MS	0	4484600	0	0	0	0	0	0	0	0	0	0	5217.XP_007006747.1	2.61e-186	542	KOG0266@1|root,KOG0266@2759|Eukaryota,38E6T@33154|Opisthokonta,3NUUI@4751|Fungi,3UYSJ@5204|Basidiomycota,3VDMM@5234|Tremellales	4751|Fungi	S	Tup N-terminal	TUP1	GO:0000003,GO:0000122,GO:0000228,GO:0000429,GO:0000430,GO:0000433,GO:0000785,GO:0000790,GO:0000988,GO:0000989,GO:0001076,GO:0001191,GO:0001196,GO:0001198,GO:0003006,GO:0003674,GO:0005488,GO:0005515,GO:0005543,GO:0005575,GO:0005622,GO:0005623,GO:0005634,GO:0005654,GO:0005694,GO:0006323,GO:0006325,GO:0006333,GO:0006338,GO:0006342,GO:0006355,GO:0006357,GO:0006950,GO:0006970,GO:0006996,GO:0007154,GO:…	ko:K06666	ko04011,ko04111,map04011,map04111	Tup_N,WD40	OTHER	1	0	NA	NA	NA	NA	NA	NA
334538	NA	NA	NA	By MS/MS	By MS/MS	By MS/MS	0	0	0	4690600	19962000	6498400	0	0	0	0	0	0	552467.XP_003192152.1	3.65e-223	637	COG0624@1|root,KOG2275@2759|Eukaryota,39RWD@33154|Opisthokonta,3NU4A@4751|Fungi,3UZMD@5204|Basidiomycota,3VDF2@5234|Tremellales	4751|Fungi	E	Peptidase family M20/M25/M40	NA	GO:0000322,GO:0000323,GO:0000324,GO:0000328,GO:0003674,GO:0003824,GO:0004180,GO:0005575,GO:0005622,GO:0005623,GO:0005737,GO:0005773,GO:0005775,GO:0006508,GO:0006807,GO:0008150,GO:0008152,GO:0008233,GO:0008238,GO:0009056,GO:0009057,GO:0009987,GO:0016787,GO:0019538,GO:0030163,GO:0031974,GO:0043170,GO:0043226,GO:0043227,GO:0043229,GO:0043231,GO:0043233,GO:0044237,GO:0044238,GO:0044248,GO:0044257,GO:…	ko:K01293	NA	M20_dimer,Peptidase_M20	OTHER	1	0	NA	NA	NA	NA	NA	NA
334561	By MS/MS	By MS/MS	By MS/MS	By MS/MS	By MS/MS	By MS/MS	51803000	36805000	46849000	176250000	311170000	556630000	29902000	0	51151000	28904000	66291000	172650000	5217.XP_007002386.1	1.34e-126	376	2ECJY@1|root,2SIEA@2759|Eukaryota,3AED0@33154|Opisthokonta,3PA44@4751|Fungi,3V46R@5204|Basidiomycota,3VDWR@5234|Tremellales	4751|Fungi	S	Glycoside hydrolase family 16 protein	NA	NA	NA	NA	Glyco_hydro_16	SP	0.000418	0.999548	CS pos: 14-15. Pr: 0.5889	GH	GH16	NA	GH16:55.1	GH16*20
334650	NA	NA	NA	NA	By MS/MS	NA	0	0	0	0	52683000	0	0	0	0	0	0	0	82508.K1VF65	2.29e-59	196	2CYWF@1|root,2S6W0@2759|Eukaryota,3A9HP@33154|Opisthokonta,3P7DW@4751|Fungi,3V26E@5204|Basidiomycota,3VFTJ@5234|Tremellales	4751|Fungi	S	Rrp15p	NA	NA	NA	NA	Rrp15p	OTHER	1	0	NA	NA	NA	NA	NA	NA
334695	By MS/MS	By MS/MS	By MS/MS	By MS/MS	By MS/MS	By MS/MS	524110000	351130000	551510000	3305300000	10719000000	17537000000	171610000	72643000	189530000	428030000	524370000	1047500000	5207.AAW42359	4.97e-302	859	28N82@1|root,2QUTC@2759|Eukaryota,38HRW@33154|Opisthokonta,3NZMU@4751|Fungi,3V025@5204|Basidiomycota,3VEEU@5234|Tremellales	4751|Fungi	S	heparinase ii iii family protein	NA	NA	NA	NA	Hepar_II_III	OTHER	1	0	NA	PL	PL35	NA	PL35:2.1	PL35*1
334749	By MS/MS	By MS/MS	By matching	By MS/MS	By MS/MS	By MS/MS	3979900	12147000	4740700	41804000	171830000	36183000	5630800	5586500	4060300	10206000	10056000	5220000	552467.XP_003196719.1	7.16999999993371e-314	866	COG1499@1|root,KOG2613@2759|Eukaryota,38ESW@33154|Opisthokonta,3NTWS@4751|Fungi,3UY4U@5204|Basidiomycota,3VEPM@5234|Tremellales	4751|Fungi	J	Acts as an adapter for the XPO1 CRM1-mediated export of the 60S ribosomal subunit	NMD3	GO:0000054,GO:0000055,GO:0003674,GO:0005488,GO:0005575,GO:0005622,GO:0005623,GO:0005634,GO:0005737,GO:0005829,GO:0006403,GO:0006405,GO:0006611,GO:0006810,GO:0006886,GO:0006913,GO:0008104,GO:0008150,GO:0015031,GO:0015833,GO:0015931,GO:0022613,GO:0030684,GO:0030687,GO:0031503,GO:0032991,GO:0033036,GO:0033750,GO:0034613,GO:0042254,GO:0042886,GO:0043021,GO:0043023,GO:0043226,GO:0043227,GO:0043229,GO:…	ko:K07562	ko03008,ko03013,map03008,map03013	NMD3	OTHER	1	0	NA	NA	NA	NA	NA	NA
334902	By MS/MS	By MS/MS	By MS/MS	By MS/MS	By MS/MS	By MS/MS	43736000	141160000	42550000	95963000	266160000	200850000	17203000	32390000	17637000	16714000	21189000	16614000	5217.XP_007002067.1	1.62e-64	200	COG0537@1|root,KOG3275@2759|Eukaryota,3A3J2@33154|Opisthokonta,3P2XN@4751|Fungi,3V1EK@5204|Basidiomycota,3VFHC@5234|Tremellales	4751|Fungi	T	HIT domain	HNT1	GO:0000166,GO:0003674,GO:0003824,GO:0005488,GO:0005575,GO:0005622,GO:0005623,GO:0005634,GO:0005737,GO:0006139,GO:0006725,GO:0006753,GO:0006793,GO:0006796,GO:0006807,GO:0008150,GO:0008152,GO:0009117,GO:0009987,GO:0016787,GO:0016810,GO:0016811,GO:0019637,GO:0034641,GO:0036094,GO:0043226,GO:0043227,GO:0043229,GO:0043231,GO:0043530,GO:0044237,GO:0044238,GO:0044281,GO:0044424,GO:0044464,GO:0046483,GO:…	ko:K01518	ko00230,ko00240,map00230,map00240	HIT	OTHER	1	0	NA	NA	NA	NA	NA	NA
335080	By MS/MS	By MS/MS	NA	By MS/MS	By MS/MS	By MS/MS	6132000	22542000	0	8872300	20021000	4973500	3106800	5502300	0	2774200	0	0	5207.AAW46856	2.89e-275	768	COG0807@1|root,KOG1284@2759|Eukaryota,39JRY@33154|Opisthokonta,3NXYB@4751|Fungi,3V02N@5204|Basidiomycota,3VET8@5234|Tremellales	4751|Fungi	H	GTP cyclohydrolase N terminal	NA	NA	NA	NA	GTP_CH_N,GTP_cyclohydro2	OTHER	1	0	NA	NA	NA	NA	NA	NA
335087	NA	NA	NA	NA	By MS/MS	By matching	0	0	0	0	5581200	3686300	0	0	0	0	0	0	82508.K1VVI9	4.56e-257	726	COG1867@1|root,KOG1253@2759|Eukaryota,38I4E@33154|Opisthokonta,3NUG5@4751|Fungi,3UY21@5204|Basidiomycota,3VD1J@5234|Tremellales	4751|Fungi	J	N2,N2-dimethylguanosine tRNA methyltransferase	TRM1	GO:0001510,GO:0002940,GO:0003674,GO:0003824,GO:0004809,GO:0005575,GO:0005622,GO:0005623,GO:0005634,GO:0005635,GO:0005637,GO:0005737,GO:0005739,GO:0006139,GO:0006396,GO:0006399,GO:0006400,GO:0006725,GO:0006807,GO:0008033,GO:0008150,GO:0008152,GO:0008168,GO:0008170,GO:0008173,GO:0008175,GO:0008757,GO:0009451,GO:0009987,GO:0010467,GO:0012505,GO:0016020,GO:0016070,GO:0016423,GO:0016740,GO:0016741,GO:…	ko:K00555	NA	TRM	OTHER	1	0	NA	NA	NA	NA	NA	NA
335135	By MS/MS	By MS/MS	NA	By MS/MS	By MS/MS	By MS/MS	5719800	20049000	0	35371000	117820000	77607000	6705700	9570200	0	0	10799000	11031000	5217.XP_007001932.1	3.98e-34	121	2DZRD@1|root,2S786@2759|Eukaryota,3A9KQ@33154|Opisthokonta,3P780@4751|Fungi,3V2I6@5204|Basidiomycota,3VH6X@5234|Tremellales	4751|Fungi	S	NADH-ubiquinone oxidoreductase MWFE subunit	NA	NA	NA	NA	MWFE	OTHER	1	2.5e-05	NA	NA	NA	NA	NA	NA
335169	By MS/MS	By MS/MS	By MS/MS	By matching	By MS/MS	By MS/MS	48994000	24358000	48669000	32205000	110290000	76303000	19303000	7570300	19264000	5202400	8088200	6154300	552467.XP_003191322.1	2.12e-191	541	COG5020@1|root,KOG4472@2759|Eukaryota,38CI7@33154|Opisthokonta,3NUKP@4751|Fungi,3UXV5@5204|Basidiomycota,3VDMV@5234|Tremellales	4751|Fungi	G	Glycolipid 2-alpha-mannosyltransferase	NA	NA	ko:K10967	ko00514,map00514	Glyco_transf_15	OTHER	0.999954	8.2e-05	NA	GT	GT15	NA	GT15:1.3	GT15*1
335315	NA	By MS/MS	NA	NA	By MS/MS	By MS/MS	0	8349800	0	0	12879000	2327900	0	2931700	0	0	1573700	0	82508.K1VFF5	1.06e-253	711	COG1012@1|root,KOG2451@2759|Eukaryota,38D8C@33154|Opisthokonta,3NVW2@4751|Fungi,3UXZS@5204|Basidiomycota,3VEE3@5234|Tremellales	4751|Fungi	E	Belongs to the aldehyde dehydrogenase family	NA	NA	ko:K00135	ko00250,ko00310,ko00350,ko00650,ko00760,ko01100,ko01120,map00250,map00310,map00350,map00650,map00760,map01100,map01120	Aldedh	OTHER	1	2e-06	NA	NA	NA	NA	NA	NA
335460	By MS/MS	By MS/MS	By MS/MS	By MS/MS	By MS/MS	By MS/MS	28655000	71877000	20254000	44931000	30497000	26111000	8921900	11214000	8179300	7366500	5223200	3767200	82508.K1WE07	0	1081	COG0639@1|root,KOG0375@2759|Eukaryota,38BQG@33154|Opisthokonta,3NTWU@4751|Fungi,3UZX4@5204|Basidiomycota,3VD3M@5234|Tremellales	4751|Fungi	T	Protein phosphatase 2A homologues, catalytic domain.	NA	NA	ko:K04348	ko04010,ko04020,ko04022,ko04114,ko04218,ko04310,ko04360,ko04370,ko04380,ko04650,ko04658,ko04659,ko04660,ko04662,ko04720,ko04724,ko04728,ko04921,ko04922,ko04924,ko05010,ko05014,ko05031,ko05152,ko05166,ko05167,map04010,map04020,map04022,map04114,map04218,map04310,map04360,map04370,map04380,map04650,map04658,map04659,map04660,map04662,map04720,map04724,map04728,map04921,map04922,map04924,map05010,ma…	Metallophos	OTHER	1	0	NA	NA	NA	NA	NA	NA
335553	NA	By MS/MS	By MS/MS	By MS/MS	By MS/MS	NA	0	6983800	1952400	8025400	5473700	0	0	0	0	0	0	0	5207.AAW44451	0	1067	KOG2220@1|root,KOG2220@2759|Eukaryota,38CYR@33154|Opisthokonta,3NUZ5@4751|Fungi,3UZAJ@5204|Basidiomycota,3VDH8@5234|Tremellales	4751|Fungi	S	BRO1-like domain	RIM20	GO:0000815,GO:0001403,GO:0005575,GO:0005622,GO:0005623,GO:0005634,GO:0005737,GO:0005768,GO:0005886,GO:0006082,GO:0006508,GO:0006790,GO:0006807,GO:0006810,GO:0008150,GO:0008152,GO:0009058,GO:0009268,GO:0009308,GO:0009405,GO:0009628,GO:0009653,GO:0009889,GO:0009891,GO:0009893,GO:0009987,GO:0010008,GO:0010035,GO:0010038,GO:0010226,GO:0010467,GO:0010565,GO:0010570,GO:0012505,GO:0016020,GO:0016053,GO:…	ko:K12200	ko04144,map04144	ALIX_LYPXL_bnd,BRO1	OTHER	1	0	NA	NA	NA	NA	NA	NA
335787	By MS/MS	By MS/MS	By MS/MS	By MS/MS	By MS/MS	By MS/MS	1243300000	704570000	1108800000	186150000	2102100000	1105800000	603460000	263170000	658370000	121070000	454530000	397560000	202698.XP_007387798.1	6.64e-31	116	2C6JF@1|root,2SQQ6@2759|Eukaryota,3AQFG@33154|Opisthokonta,3PEEW@4751|Fungi,3V60S@5204|Basidiomycota,22EAZ@155619|Agaricomycetes,3H8CA@355688|Agaricomycetes incertae sedis	4751|Fungi	-	-	NA	NA	NA	NA	-	SP	0.000209	0.999762	CS pos: 19-20. Pr: 0.9178	NA	NA	NA	NA	NA
335858	By MS/MS	By MS/MS	By MS/MS	By MS/MS	By MS/MS	By MS/MS	72910000	154020000	66376000	138600000	299690000	254240000	29090000	36376000	24266000	30210000	21112000	23199000	552467.XP_003191404.1	1.54e-249	686	COG0174@1|root,KOG0683@2759|Eukaryota,38F54@33154|Opisthokonta,3NVDA@4751|Fungi,3UZD6@5204|Basidiomycota,3VCSR@5234|Tremellales	4751|Fungi	E	Glutamine synthetase, beta-Grasp domain	GLN1	GO:0003674,GO:0003824,GO:0004356,GO:0005575,GO:0005622,GO:0005623,GO:0005634,GO:0005737,GO:0006082,GO:0006520,GO:0006536,GO:0006541,GO:0006542,GO:0006807,GO:0008150,GO:0008152,GO:0008652,GO:0009058,GO:0009064,GO:0009084,GO:0009987,GO:0016053,GO:0016211,GO:0016874,GO:0016879,GO:0016880,GO:0019676,GO:0019740,GO:0019752,GO:0031974,GO:0031981,GO:0034399,GO:0043226,GO:0043227,GO:0043229,GO:0043231,GO:…	ko:K01915	ko00220,ko00250,ko00630,ko00910,ko01100,ko01120,ko01230,ko02020,ko04217,ko04724,ko04727,map00220,map00250,map00630,map00910,map01100,map01120,map01230,map02020,map04217,map04724,map04727	Gln-synt_C,Gln-synt_N	OTHER	1	0	NA	NA	NA	NA	NA	NA
335912	By MS/MS	By MS/MS	By MS/MS	By MS/MS	By MS/MS	By MS/MS	158570000	552490000	168520000	726330000	919240000	424710000	63666000	104190000	79343000	129040000	79403000	50175000	5207.AAW40904	1.13e-211	595	COG0022@1|root,KOG0525@2759|Eukaryota,38BVR@33154|Opisthokonta,3NV7X@4751|Fungi,3UY3M@5204|Basidiomycota,3VDCF@5234|Tremellales	4751|Fungi	C	pyruvate dehydrogenase (acetyl-transferring)	NA	NA	ko:K00167	ko00280,ko00640,ko01100,ko01110,ko01130,map00280,map00640,map01100,map01110,map01130	Transket_pyr,Transketolase_C	OTHER	1	0	NA	NA	NA	NA	NA	NA
335984	NA	NA	NA	By MS/MS	By MS/MS	By MS/MS	0	0	0	4541900	7460100	8731400	0	0	0	0	0	0	5217.XP_007008352.1	4.64e-96	280	COG5391@1|root,KOG2527@2759|Eukaryota,38XF0@33154|Opisthokonta,3P1WX@4751|Fungi,3V0J8@5204|Basidiomycota,3VF2C@5234|Tremellales	4751|Fungi	U	PhoX homologous domain, present in p47phox and p40phox.	SNX3	GO:0000322,GO:0000323,GO:0000324,GO:0000329,GO:0000407,GO:0003674,GO:0005488,GO:0005543,GO:0005575,GO:0005622,GO:0005623,GO:0005737,GO:0005768,GO:0005773,GO:0005774,GO:0005829,GO:0006810,GO:0006886,GO:0006897,GO:0006914,GO:0006996,GO:0008104,GO:0008150,GO:0008152,GO:0008289,GO:0009056,GO:0009987,GO:0012505,GO:0015031,GO:0015833,GO:0016020,GO:0016043,GO:0016050,GO:0016192,GO:0016197,GO:0016482,GO:…	ko:K17918	ko04144,map04144	PX	OTHER	1	0	NA	NA	NA	NA	NA	NA
336101	NA	By matching	NA	By MS/MS	By MS/MS	By MS/MS	0	3490600	0	14493000	55815000	45867000	0	0	0	5247000	6885800	9348700	552467.XP_003195638.1	8.82e-130	384	COG5200@1|root,KOG0796@2759|Eukaryota,38DNS@33154|Opisthokonta,3NVIA@4751|Fungi,3UZA7@5204|Basidiomycota,3VEKS@5234|Tremellales	4751|Fungi	A	small nuclear ribonucleoprotein	LUC7	GO:0000245,GO:0000375,GO:0000377,GO:0000395,GO:0000398,GO:0003674,GO:0003676,GO:0003723,GO:0003729,GO:0005488,GO:0005575,GO:0005622,GO:0005623,GO:0005634,GO:0005681,GO:0005684,GO:0005685,GO:0005737,GO:0005829,GO:0006139,GO:0006376,GO:0006396,GO:0006397,GO:0006725,GO:0006807,GO:0008150,GO:0008152,GO:0008380,GO:0009987,GO:0010467,GO:0016043,GO:0016070,GO:0016071,GO:0022607,GO:0022613,GO:0022618,GO:…	NA	NA	LUC7	OTHER	1	0	NA	NA	NA	NA	NA	NA
336164	By MS/MS	By MS/MS	By MS/MS	By MS/MS	By MS/MS	By matching	5786500	15920000	7622200	14784000	20093000	3838900	0	0	0	0	0	0	5207.AAW42366	3.15e-177	515	COG1230@1|root,KOG1483@2759|Eukaryota,38CHY@33154|Opisthokonta,3NV9V@4751|Fungi,3UY0Z@5204|Basidiomycota,3VEU6@5234|Tremellales	4751|Fungi	P	Cation efflux family	ZRC1	GO:0000041,GO:0000322,GO:0000323,GO:0000324,GO:0000329,GO:0003674,GO:0005215,GO:0005385,GO:0005575,GO:0005622,GO:0005623,GO:0005737,GO:0005739,GO:0005773,GO:0005774,GO:0005783,GO:0005789,GO:0006810,GO:0006811,GO:0006812,GO:0006824,GO:0006829,GO:0006873,GO:0006875,GO:0006877,GO:0006882,GO:0006950,GO:0008150,GO:0008324,GO:0009636,GO:0009987,GO:0010035,GO:0010038,GO:0010043,GO:0012505,GO:0015075,GO:…	ko:K14688	ko04978,map04978	Cation_efflux	OTHER	1	0	NA	NA	NA	NA	NA	NA
336294	By MS/MS	By MS/MS	NA	By matching	By MS/MS	By MS/MS	944640	5492900	0	4132600	7462500	5614700	0	0	0	0	0	0	82508.K1VXG8	2.14e-226	656	28P6R@1|root,2QVTM@2759|Eukaryota,39RKX@33154|Opisthokonta,3NX9I@4751|Fungi,3V1JN@5204|Basidiomycota,3VEB6@5234|Tremellales	4751|Fungi	K	complex subunit rsc9	RSC9	GO:0000122,GO:0000228,GO:0000302,GO:0000785,GO:0000790,GO:0001067,GO:0003674,GO:0003676,GO:0003677,GO:0005488,GO:0005575,GO:0005622,GO:0005623,GO:0005634,GO:0005694,GO:0006139,GO:0006325,GO:0006333,GO:0006337,GO:0006338,GO:0006342,GO:0006351,GO:0006354,GO:0006355,GO:0006357,GO:0006360,GO:0006366,GO:0006368,GO:0006725,GO:0006807,GO:0006950,GO:0006979,GO:0006996,GO:0008150,GO:0008152,GO:0009058,GO:…	ko:K11763	NA	ARID	OTHER	0.999937	9.8e-05	NA	NA	NA	NA	NA	NA
336357	By MS/MS	By MS/MS	By MS/MS	By MS/MS	By MS/MS	By MS/MS	29648000	65390000	23443000	46385000	89252000	40621000	8191800	12464000	8484700	8128900	5307300	5453700	82508.K1VMS7	1.1e-306	871	COG5594@1|root,KOG1134@2759|Eukaryota,38BVW@33154|Opisthokonta,3NW23@4751|Fungi,3V39N@5204|Basidiomycota,3VCUD@5234|Tremellales	4751|Fungi	S	Extracellular tail, of 10TM putative phosphate transporter	PHM7	GO:0000322,GO:0000323,GO:0000324,GO:0000329,GO:0005575,GO:0005622,GO:0005623,GO:0005737,GO:0005773,GO:0005774,GO:0005783,GO:0006810,GO:0006892,GO:0006893,GO:0008150,GO:0012505,GO:0016020,GO:0016021,GO:0016192,GO:0031090,GO:0031224,GO:0043226,GO:0043227,GO:0043229,GO:0043231,GO:0044422,GO:0044424,GO:0044425,GO:0044437,GO:0044444,GO:0044446,GO:0044464,GO:0048193,GO:0051179,GO:0051234,GO:0071944,GO:…	ko:K21989	NA	PHM7_cyt,PHM7_ext,RSN1_7TM,RSN1_TM	OTHER	1	1e-06	NA	NA	NA	NA	NA	NA
336389	By MS/MS	By MS/MS	By MS/MS	By MS/MS	By MS/MS	By MS/MS	12175000	20800000	26164000	46277000	105700000	113870000	8233200	10230000	15123000	16583000	8733500	11222000	82508.K1VP09	3.73e-131	378	COG0120@1|root,KOG3075@2759|Eukaryota,38HSY@33154|Opisthokonta,3NWRM@4751|Fungi,3UYCK@5204|Basidiomycota,3VCWW@5234|Tremellales	4751|Fungi	G	Ribose 5-phosphate isomerase A (phosphoriboisomerase A)	RKI1	GO:0003674,GO:0003824,GO:0004751,GO:0005575,GO:0005622,GO:0005623,GO:0005634,GO:0005737,GO:0005975,GO:0005996,GO:0006014,GO:0006081,GO:0006098,GO:0006139,GO:0006725,GO:0006732,GO:0006733,GO:0006739,GO:0006753,GO:0006766,GO:0006767,GO:0006793,GO:0006796,GO:0006807,GO:0008150,GO:0008152,GO:0008614,GO:0008615,GO:0009052,GO:0009058,GO:0009110,GO:0009117,GO:0009987,GO:0016853,GO:0016860,GO:0016861,GO:…	ko:K01807	ko00030,ko00710,ko01100,ko01110,ko01120,ko01130,ko01200,ko01230,map00030,map00710,map01100,map01110,map01120,map01130,map01200,map01230	Rib_5-P_isom_A	OTHER	1	0	NA	NA	NA	NA	NA	NA
336473	By matching	By MS/MS	By MS/MS	NA	By matching	By matching	4177900	16232000	2963100	0	9168700	3704900	0	0	0	0	0	0	5217.XP_007006408.1	2.23e-118	339	COG1100@1|root,KOG0072@2759|Eukaryota,38G98@33154|Opisthokonta,3NWAZ@4751|Fungi,3UZ35@5204|Basidiomycota,3VEQK@5234|Tremellales	4751|Fungi	U	Belongs to the small GTPase superfamily. Arf family	ARL1	GO:0000045,GO:0003674,GO:0003824,GO:0003924,GO:0005575,GO:0005622,GO:0005623,GO:0005737,GO:0005794,GO:0005802,GO:0005829,GO:0006605,GO:0006623,GO:0006810,GO:0006886,GO:0006892,GO:0006893,GO:0006897,GO:0006914,GO:0006950,GO:0006996,GO:0007033,GO:0007034,GO:0008104,GO:0008150,GO:0008152,GO:0009056,GO:0009987,GO:0012505,GO:0015031,GO:0015833,GO:0016043,GO:0016192,GO:0016236,GO:0016462,GO:0016787,GO:…	ko:K07942	NA	Arf	OTHER	1	0	NA	NA	NA	NA	NA	NA
336483	By MS/MS	By MS/MS	By MS/MS	By MS/MS	By MS/MS	By MS/MS	124260000	450770000	100060000	200530000	533870000	297460000	33054000	61975000	38142000	44478000	35749000	29931000	82508.K1W7L3	1.67e-146	428	KOG3378@1|root,KOG3378@2759|Eukaryota,39SRH@33154|Opisthokonta,3NWBB@4751|Fungi,3V851@5204|Basidiomycota,3VGQK@5234|Tremellales	4751|Fungi	C	Oxidoreductase FAD-binding domain	YHB1	GO:0000166,GO:0001505,GO:0003674,GO:0003824,GO:0005488,GO:0005575,GO:0005622,GO:0005623,GO:0005634,GO:0005737,GO:0005739,GO:0005759,GO:0005829,GO:0006807,GO:0006950,GO:0006979,GO:0008150,GO:0008152,GO:0008941,GO:0009056,GO:0009405,GO:0009605,GO:0009607,GO:0009636,GO:0009987,GO:0010033,GO:0010494,GO:0016491,GO:0016661,GO:0016662,GO:0016705,GO:0016708,GO:0016966,GO:0017144,GO:0030447,GO:0031974,GO:…	ko:K04563,ko:K05916	ko04011,ko04111,ko04113,ko05132,map04011,map04111,map04113,map05132	FAD_binding_6,Globin,NAD_binding_1	OTHER	1	1.2e-05	NA	NA	NA	NA	NA	NA
336551	By MS/MS	By MS/MS	By MS/MS	By MS/MS	By MS/MS	By MS/MS	60796000	191050000	65886000	211280000	320630000	236850000	21867000	36682000	25615000	21258000	16592000	19902000	82508.K1W563	3.33e-263	723	COG0515@1|root,KOG0658@2759|Eukaryota,38D5S@33154|Opisthokonta,3NU1R@4751|Fungi,3UYXK@5204|Basidiomycota,3VEDC@5234|Tremellales	4751|Fungi	T	Serine/Threonine protein kinases, catalytic domain	gsk3	GO:0000003,GO:0003006,GO:0003674,GO:0003824,GO:0004672,GO:0004674,GO:0004712,GO:0004713,GO:0005575,GO:0005622,GO:0005623,GO:0005737,GO:0006464,GO:0006468,GO:0006508,GO:0006793,GO:0006796,GO:0006807,GO:0006950,GO:0006970,GO:0007049,GO:0007088,GO:0007346,GO:0008150,GO:0008152,GO:0009266,GO:0009408,GO:0009628,GO:0009651,GO:0009653,GO:0009894,GO:0009987,GO:0010564,GO:0016301,GO:0016310,GO:0016740,GO:…	ko:K03083,ko:K08282,ko:K12766	ko01521,ko04012,ko04062,ko04110,ko04113,ko04150,ko04151,ko04310,ko04340,ko04341,ko04360,ko04390,ko04510,ko04550,ko04657,ko04660,ko04662,ko04711,ko04722,ko04728,ko04910,ko04916,ko04917,ko04919,ko04931,ko04932,ko04934,ko05010,ko05160,ko05162,ko05164,ko05165,ko05166,ko05167,ko05169,ko05200,ko05210,ko05213,ko05215,ko05217,ko05224,ko05225,ko05226,map01521,map04012,map04062,map04110,map04113,map04150,m…	Pkinase	OTHER	1	0	NA	NA	NA	NA	NA	NA
336605	By MS/MS	By MS/MS	By MS/MS	By MS/MS	By MS/MS	By MS/MS	72890000	45159000	55051000	40850000	241680000	210740000	31879000	14580000	25690000	19637000	29514000	32822000	5217.XP_007008209.1	1.58e-271	785	KOG3607@1|root,KOG3607@2759|Eukaryota,38B6W@33154|Opisthokonta,3NTZ6@4751|Fungi,3UZHA@5204|Basidiomycota,3VDV3@5234|Tremellales	4751|Fungi	O	Homologues of snake disintegrins	ADMB	GO:0003674,GO:0003824,GO:0005575,GO:0006508,GO:0006807,GO:0008150,GO:0008152,GO:0008233,GO:0008237,GO:0016020,GO:0016787,GO:0019538,GO:0043170,GO:0044238,GO:0070011,GO:0071704,GO:0140096,GO:1901564	NA	NA	Disintegrin,Pep_M12B_propep,Reprolysin_2,Reprolysin_4,Reprolysin_5	OTHER	1	2e-06	NA	NA	NA	NA	NA	NA
336623	By MS/MS	By MS/MS	NA	By matching	By matching	NA	1780100	3631900	0	1297500	2878000	0	0	0	0	0	0	0	82508.K1VY53	2.58e-60	207	COG2319@1|root,KOG2394@2759|Eukaryota,38GEV@33154|Opisthokonta,3NVMB@4751|Fungi,3UZ69@5204|Basidiomycota,3VESD@5234|Tremellales	4751|Fungi	S	WD domain, G-beta repeat	creC	GO:0005575,GO:0005622,GO:0005623,GO:0005634,GO:0005737,GO:0006355,GO:0006464,GO:0006508,GO:0006807,GO:0007154,GO:0007584,GO:0008150,GO:0008152,GO:0009605,GO:0009889,GO:0009890,GO:0009892,GO:0009987,GO:0009991,GO:0010468,GO:0010556,GO:0010558,GO:0010605,GO:0010629,GO:0016579,GO:0019219,GO:0019222,GO:0019538,GO:0030428,GO:0031323,GO:0031324,GO:0031326,GO:0031327,GO:0031667,GO:0031668,GO:0031669,GO:…	NA	NA	WD40	OTHER	1	0	NA	NA	NA	NA	NA	NA
336629	By MS/MS	By MS/MS	By MS/MS	By MS/MS	By MS/MS	By MS/MS	19524000	24436000	24972000	31260000	30950000	56462000	12729000	7259900	13738000	11619000	7506200	13483000	5217.XP_007001051.1	2.38e-98	290	COG0225@1|root,KOG1635@2759|Eukaryota,39U04@33154|Opisthokonta,3P2RD@4751|Fungi,3V0RY@5204|Basidiomycota,3VFUV@5234|Tremellales	4751|Fungi	O	Peptide methionine sulfoxide reductase	NA	NA	ko:K07304	NA	PMSR	OTHER	1	0	NA	NA	NA	NA	NA	NA
336667	By MS/MS	By MS/MS	By MS/MS	By MS/MS	By MS/MS	By MS/MS	10704000	43180000	14833000	20142000	86020000	45452000	4740200	6710400	5333900	6054300	5030800	3658600	552467.XP_003195360.1	6.22000000211721e-315	866	COG0459@1|root,KOG0358@2759|Eukaryota,39NW1@33154|Opisthokonta,3NW0D@4751|Fungi,3UZMB@5204|Basidiomycota,3VDD1@5234|Tremellales	4751|Fungi	O	assists the folding of proteins upon ATP hydrolysis	CCT4	GO:0000166,GO:0003674,GO:0005488,GO:0005515,GO:0005524,GO:0005575,GO:0005622,GO:0005623,GO:0005737,GO:0005829,GO:0005832,GO:0005856,GO:0006457,GO:0006458,GO:0008144,GO:0008150,GO:0009987,GO:0017076,GO:0030554,GO:0032553,GO:0032555,GO:0032559,GO:0032991,GO:0035639,GO:0036094,GO:0043167,GO:0043168,GO:0043226,GO:0043228,GO:0043229,GO:0043232,GO:0044183,GO:0044424,GO:0044444,GO:0044445,GO:0044464,GO:…	ko:K09496	NA	Cpn60_TCP1	OTHER	1	1.4e-05	NA	NA	NA	NA	NA	NA
336698	NA	NA	By matching	By matching	By MS/MS	By MS/MS	0	0	3767900	10214000	28941000	22467000	0	0	0	0	3557700	3832100	552467.XP_003191686.1	4.87e-193	542	COG0418@1|root,KOG2902@2759|Eukaryota,38HVG@33154|Opisthokonta,3NU7X@4751|Fungi,3UYBF@5204|Basidiomycota,3VCX8@5234|Tremellales	4751|Fungi	F	Dihydroorotase	URA4	GO:0003674,GO:0003824,GO:0004151,GO:0005575,GO:0005622,GO:0005623,GO:0005634,GO:0005737,GO:0006139,GO:0006206,GO:0006207,GO:0006220,GO:0006221,GO:0006725,GO:0006753,GO:0006793,GO:0006796,GO:0006807,GO:0008150,GO:0008152,GO:0009058,GO:0009112,GO:0009117,GO:0009165,GO:0009987,GO:0016787,GO:0016810,GO:0016812,GO:0018130,GO:0019438,GO:0019637,GO:0019856,GO:0034641,GO:0034654,GO:0043226,GO:0043227,GO:…	ko:K01465	ko00240,ko01100,map00240,map01100	Amidohydro_1,Amidohydro_2	OTHER	0.999858	0.000185	NA	NA	NA	NA	NA	NA
336865	By MS/MS	By MS/MS	By MS/MS	By MS/MS	By MS/MS	By MS/MS	26508000	47723000	26940000	100870000	175940000	49210000	14775000	15791000	10387000	20239000	17472000	19445000	82508.K1V7Y6	7.27e-177	502	COG1064@1|root,KOG0023@2759|Eukaryota,38EJ7@33154|Opisthokonta,3NVVI@4751|Fungi,3UZ20@5204|Basidiomycota,3VGNQ@5234|Tremellales	4751|Fungi	Q	Alcohol dehydrogenase GroES-like domain	NA	NA	ko:K00002	ko00010,ko00040,ko00561,ko00930,ko01100,ko01110,ko01120,ko01130,ko01220,map00010,map00040,map00561,map00930,map01100,map01110,map01120,map01130,map01220	ADH_N,ADH_zinc_N	OTHER	1	0	NA	NA	NA	NA	NA	NA
336949	NA	NA	NA	NA	By MS/MS	NA	0	0	0	0	0	0	0	0	0	0	0	0	82508.K1V9G7	3.16e-212	598	COG0631@1|root,KOG0698@2759|Eukaryota,38FMC@33154|Opisthokonta,3NUYG@4751|Fungi,3UZZ1@5204|Basidiomycota,3VDEN@5234|Tremellales	4751|Fungi	T	Sigma factor PP2C-like phosphatases	MgPP2CL1	GO:0000001,GO:0000173,GO:0000188,GO:0000394,GO:0000749,GO:0000750,GO:0001932,GO:0001933,GO:0003674,GO:0003824,GO:0004721,GO:0004722,GO:0004724,GO:0005575,GO:0005622,GO:0005623,GO:0005634,GO:0005737,GO:0006139,GO:0006388,GO:0006396,GO:0006399,GO:0006464,GO:0006469,GO:0006470,GO:0006725,GO:0006793,GO:0006796,GO:0006807,GO:0006950,GO:0006970,GO:0006996,GO:0007005,GO:0007154,GO:0007165,GO:0007186,GO:…	ko:K19704	ko04011,map04011	PP2C	OTHER	1	1e-06	NA	NA	NA	NA	NA	NA
337081	By MS/MS	By MS/MS	By MS/MS	By MS/MS	By MS/MS	By MS/MS	35926000	76807000	21824000	53060000	150790000	54004000	14111000	17390000	12225000	12867000	13190000	9054200	82508.K1VI91	2.44e-284	791	COG1498@1|root,KOG2573@2759|Eukaryota,38D7R@33154|Opisthokonta,3NWPQ@4751|Fungi,3UZ8S@5204|Basidiomycota,3VCPW@5234|Tremellales	4751|Fungi	AJ	Small nuclear ribonucleoprotein	nop56	GO:0000154,GO:0003674,GO:0003676,GO:0003723,GO:0003729,GO:0005488,GO:0005575,GO:0005622,GO:0005623,GO:0005634,GO:0005730,GO:0005732,GO:0006139,GO:0006364,GO:0006396,GO:0006725,GO:0006807,GO:0008150,GO:0008152,GO:0009451,GO:0009987,GO:0010467,GO:0016070,GO:0016072,GO:0022613,GO:0030515,GO:0030532,GO:0030684,GO:0030686,GO:0031428,GO:0031974,GO:0031981,GO:0032040,GO:0032991,GO:0034470,GO:0034641,GO:…	ko:K14564	ko03008,map03008	NOP5NT,Nop	OTHER	1	0	NA	NA	NA	NA	NA	NA
337108	By MS/MS	By MS/MS	By MS/MS	By MS/MS	By MS/MS	By MS/MS	490830000	277650000	314720000	112570000	412510000	242460000	354230000	119830000	220700000	44321000	68363000	56476000	221103.XP_007846180.1	9.51e-22	95.5	2CYDK@1|root,2S3R6@2759|Eukaryota,3A6YQ@33154|Opisthokonta,3P61U@4751|Fungi,3V1M8@5204|Basidiomycota,228ZA@155619|Agaricomycetes,3W840@5338|Agaricales	4751|Fungi	S	Lytic transglycolase	NA	NA	NA	NA	DPBB_1	OTHER	0.999959	9.8e-05	NA	NA	NA	NA	NA	NA
337182	By MS/MS	By MS/MS	By MS/MS	By MS/MS	By MS/MS	By MS/MS	8694700	18174000	4676300	5116500	36120000	16863000	4882700	5219300	3800600	0	4297900	0	82508.K1VHR7	2.77e-197	557	COG0079@1|root,KOG0633@2759|Eukaryota,38DTP@33154|Opisthokonta,3NV21@4751|Fungi,3UXXS@5204|Basidiomycota,3VDUH@5234|Tremellales	4751|Fungi	E	Aminotransferase class I and II	HIS5	GO:0000105,GO:0003674,GO:0003824,GO:0004400,GO:0005575,GO:0005622,GO:0005623,GO:0005737,GO:0006082,GO:0006520,GO:0006547,GO:0006725,GO:0006807,GO:0008150,GO:0008152,GO:0008483,GO:0008652,GO:0009058,GO:0009987,GO:0010035,GO:0010038,GO:0010045,GO:0016053,GO:0016740,GO:0016769,GO:0018130,GO:0019438,GO:0019752,GO:0034641,GO:0042221,GO:0043436,GO:0044237,GO:0044238,GO:0044249,GO:0044281,GO:0044283,GO:…	ko:K00817	ko00340,ko00350,ko00360,ko00400,ko00401,ko00960,ko01100,ko01110,ko01130,ko01230,map00340,map00350,map00360,map00400,map00401,map00960,map01100,map01110,map01130,map01230	Aminotran_1_2	OTHER	0.71956	0.280429	NA	NA	NA	NA	NA	NA
337183	NA	By matching	NA	By matching	By MS/MS	NA	0	2936200	0	15577000	26746000	0	0	0	0	0	0	0	5217.XP_007002160.1	3.25e-31	114	COG1841@1|root,2RDGX@2759|Eukaryota,38IP3@33154|Opisthokonta,3PKK6@4751|Fungi,3VABP@5204|Basidiomycota,3VHC1@5234|Tremellales	4751|Fungi	J	Ribosomal protein L30p/L7e	NA	NA	NA	NA	Ribosomal_L30	OTHER	1	0	NA	NA	NA	NA	NA	NA
337264	By MS/MS	By MS/MS	By MS/MS	By MS/MS	By MS/MS	By MS/MS	14235000	42800000	22110000	41259000	40689000	35804000	0	7314100	7704000	10462000	5313200	3578300	82508.K1VUU5	3.47e-252	701	COG5019@1|root,KOG2655@2759|Eukaryota,38BV0@33154|Opisthokonta,3NUM5@4751|Fungi,3UYKD@5204|Basidiomycota,3VE7K@5234|Tremellales	4751|Fungi	DUZ	Belongs to the TRAFAC class TrmE-Era-EngA-EngB-Septin- like GTPase superfamily. Septin GTPase family	CDC3	GO:0000144,GO:0000166,GO:0000278,GO:0000281,GO:0000399,GO:0000910,GO:0000921,GO:0001400,GO:0001882,GO:0001883,GO:0003674,GO:0005198,GO:0005488,GO:0005525,GO:0005543,GO:0005575,GO:0005618,GO:0005619,GO:0005622,GO:0005623,GO:0005628,GO:0005737,GO:0005826,GO:0005856,GO:0005933,GO:0005935,GO:0005937,GO:0005938,GO:0005940,GO:0006996,GO:0007010,GO:0007049,GO:0007163,GO:0008150,GO:0008289,GO:0009277,GO:…	ko:K16944	NA	Septin	OTHER	0.999586	0.000429	NA	NA	NA	NA	NA	NA
337289	By MS/MS	By MS/MS	By MS/MS	By MS/MS	By MS/MS	By MS/MS	201610000	446070000	203160000	740610000	3549600000	690310000	95912000	123210000	108540000	210370000	276070000	115340000	82508.K1VNM0	4.5e-129	372	COG2125@1|root,KOG1646@2759|Eukaryota,38HEM@33154|Opisthokonta,3NUD1@4751|Fungi,3UXZH@5204|Basidiomycota,3VDAG@5234|Tremellales	4751|Fungi	J	Belongs to the eukaryotic ribosomal protein eS6 family	RPS6	GO:0000462,GO:0002181,GO:0003674,GO:0003735,GO:0005198,GO:0005575,GO:0005622,GO:0005623,GO:0005737,GO:0005829,GO:0005840,GO:0006139,GO:0006364,GO:0006396,GO:0006412,GO:0006518,GO:0006725,GO:0006807,GO:0008150,GO:0008152,GO:0009058,GO:0009059,GO:0009987,GO:0010467,GO:0015935,GO:0016070,GO:0016072,GO:0019538,GO:0022613,GO:0022626,GO:0022627,GO:0030490,GO:0030684,GO:0030686,GO:0032040,GO:0032991,GO:…	ko:K02991	ko01521,ko03010,ko04066,ko04150,ko04151,ko04371,ko04714,ko04910,ko05205,map01521,map03010,map04066,map04150,map04151,map04371,map04714,map04910,map05205	Ribosomal_S6e	OTHER	1	2e-06	NA	NA	NA	NA	NA	NA
337365	NA	By MS/MS	By matching	By MS/MS	By matching	By MS/MS	0	2707300	863550	7277300	7786200	8381400	0	0	0	0	0	0	552467.XP_003196203.1	1.84e-74	228	COG0652@1|root,KOG0879@2759|Eukaryota,38S5T@33154|Opisthokonta,3P1UU@4751|Fungi,3V0FV@5204|Basidiomycota,3VFAD@5234|Tremellales	4751|Fungi	O	PPIases accelerate the folding of proteins. It catalyzes the cis-trans isomerization of proline imidic peptide bonds in oligopeptides	cyp3	GO:0000375,GO:0000377,GO:0000398,GO:0000413,GO:0003674,GO:0003755,GO:0003824,GO:0005575,GO:0005622,GO:0005623,GO:0005634,GO:0006139,GO:0006396,GO:0006397,GO:0006464,GO:0006725,GO:0006807,GO:0008150,GO:0008152,GO:0008380,GO:0009987,GO:0010467,GO:0016070,GO:0016071,GO:0016853,GO:0016859,GO:0018193,GO:0018208,GO:0019538,GO:0034641,GO:0036211,GO:0043170,GO:0043226,GO:0043227,GO:0043229,GO:0043231,GO:…	ko:K09567	ko03040,map03040	Pro_isomerase	OTHER	1	0	NA	NA	NA	NA	NA	NA
337394	By MS/MS	By MS/MS	By MS/MS	By MS/MS	By MS/MS	By MS/MS	536460000	383650000	371760000	322360000	2852100000	2014000000	432010000	191010000	328800000	109960000	495630000	463140000	36080.S2IVQ3	8.73e-33	115	COG2053@1|root,KOG3502@2759|Eukaryota,3A8FK@33154|Opisthokonta,3P583@4751|Fungi,1GUDY@112252|Fungi incertae sedis	4751|Fungi	J	Ribosomal protein S28e	RPS28A	GO:0000028,GO:0002181,GO:0003674,GO:0003676,GO:0003723,GO:0003735,GO:0005198,GO:0005488,GO:0005575,GO:0005622,GO:0005623,GO:0005737,GO:0005829,GO:0005840,GO:0006139,GO:0006364,GO:0006396,GO:0006403,GO:0006405,GO:0006407,GO:0006412,GO:0006518,GO:0006611,GO:0006725,GO:0006807,GO:0006810,GO:0006886,GO:0006913,GO:0006996,GO:0008104,GO:0008150,GO:0008152,GO:0009058,GO:0009059,GO:0009893,GO:0009894,GO:…	ko:K02979	ko03010,map03010	Ribosomal_S28e	OTHER	1	0	NA	NA	NA	NA	NA	NA
337402	By MS/MS	By MS/MS	By MS/MS	By MS/MS	By MS/MS	By MS/MS	398720000	637730000	517640000	1489800000	3262500000	2106900000	134740000	125540000	195290000	229020000	253510000	208150000	5207.AAW43233	7.59e-60	187	KOG3434@1|root,KOG3434@2759|Eukaryota,3A5RD@33154|Opisthokonta,3P2WB@4751|Fungi,3V1WG@5204|Basidiomycota,3VGYM@5234|Tremellales	4751|Fungi	J	Ribosomal L22e protein family	rpl22	GO:0002181,GO:0003674,GO:0003676,GO:0003723,GO:0003735,GO:0005198,GO:0005488,GO:0005575,GO:0005622,GO:0005623,GO:0005737,GO:0005829,GO:0005840,GO:0006412,GO:0006518,GO:0006807,GO:0008150,GO:0008152,GO:0009058,GO:0009059,GO:0009987,GO:0010467,GO:0015934,GO:0019538,GO:0022625,GO:0022626,GO:0032991,GO:0034641,GO:0034645,GO:0043043,GO:0043170,GO:0043226,GO:0043228,GO:0043229,GO:0043232,GO:0043603,GO:…	ko:K02891	ko03010,map03010	Ribosomal_L22e	OTHER	1	0	NA	NA	NA	NA	NA	NA
337421	By matching	By matching	By matching	By MS/MS	By MS/MS	By matching	859040	2315000	1461300	4689300	8671600	6501300	0	0	0	0	0	0	5217.XP_007008250.1	5.27e-159	447	COG1057@1|root,KOG3199@2759|Eukaryota,38BZ1@33154|Opisthokonta,3NU32@4751|Fungi,3UZQQ@5204|Basidiomycota,3VDB9@5234|Tremellales	4751|Fungi	H	Cytidylyltransferase-like	NMA1	GO:0000309,GO:0003674,GO:0003824,GO:0004515,GO:0005575,GO:0005622,GO:0005623,GO:0005634,GO:0005737,GO:0006082,GO:0006139,GO:0006520,GO:0006531,GO:0006725,GO:0006732,GO:0006733,GO:0006753,GO:0006793,GO:0006796,GO:0006807,GO:0008150,GO:0008152,GO:0009058,GO:0009066,GO:0009108,GO:0009117,GO:0009165,GO:0009435,GO:0009987,GO:0016740,GO:0016772,GO:0016779,GO:0018130,GO:0019355,GO:0019359,GO:0019362,GO:…	ko:K06210	ko00760,ko01100,map00760,map01100	CTP_transf_like	OTHER	1	0	NA	NA	NA	NA	NA	NA
337466	By MS/MS	By MS/MS	By MS/MS	By MS/MS	By MS/MS	NA	6519000	16545000	7086100	0	6996200	0	0	0	0	0	0	0	82508.K1VTK3	0	1208	COG0578@1|root,KOG0042@2759|Eukaryota,38FKM@33154|Opisthokonta,3NU42@4751|Fungi,3UZ87@5204|Basidiomycota,3VDV4@5234|Tremellales	4751|Fungi	C	Belongs to the FAD-dependent glycerol-3-phosphate dehydrogenase family	GUT2	GO:0001302,GO:0003674,GO:0003824,GO:0004368,GO:0005575,GO:0005622,GO:0005623,GO:0005737,GO:0005739,GO:0005740,GO:0005741,GO:0005975,GO:0006066,GO:0006071,GO:0006072,GO:0006116,GO:0006139,GO:0006725,GO:0006732,GO:0006733,GO:0006734,GO:0006753,GO:0006793,GO:0006796,GO:0006807,GO:0007568,GO:0007569,GO:0008150,GO:0008152,GO:0009117,GO:0009331,GO:0009987,GO:0016020,GO:0016021,GO:0016491,GO:0016614,GO:…	ko:K00111	ko00564,ko01110,map00564,map01110	DAO,DAO_C,EF-hand_7	OTHER	0.979124	0.020881	NA	NA	NA	NA	NA	NA
337512	By matching	By MS/MS	By MS/MS	By MS/MS	By MS/MS	By MS/MS	3000800	15984000	3995300	6868000	22977000	19791000	0	5824500	0	0	2757000	3487000	82508.K1VJR3	1.46e-95	285	KOG3945@1|root,KOG3945@2759|Eukaryota,39IZV@33154|Opisthokonta,3Q3CV@4751|Fungi,3V0DU@5204|Basidiomycota,3VEW2@5234|Tremellales	4751|Fungi	S	Mitochondrial 18 KDa protein (MTP18)	NA	NA	ko:K17981	NA	MTP18	OTHER	1	0	NA	NA	NA	NA	NA	NA
337526	By matching	NA	By MS/MS	By matching	By MS/MS	NA	4155200	0	4364800	17448000	25762000	0	0	0	0	0	0	0	82508.K1WTR5	2.29e-116	350	COG0400@1|root,KOG2112@2759|Eukaryota,38RN5@33154|Opisthokonta,3NZH9@4751|Fungi,3V0W8@5204|Basidiomycota,3VDIP@5234|Tremellales	4751|Fungi	I	Phospholipase/Carboxylesterase	NA	GO:0002084,GO:0003674,GO:0003824,GO:0005575,GO:0005622,GO:0005623,GO:0005634,GO:0005737,GO:0006464,GO:0006807,GO:0008150,GO:0008152,GO:0008474,GO:0009056,GO:0009057,GO:0009987,GO:0016787,GO:0016788,GO:0016790,GO:0019538,GO:0030163,GO:0035601,GO:0036211,GO:0042157,GO:0042159,GO:0043170,GO:0043226,GO:0043227,GO:0043229,GO:0043231,GO:0043412,GO:0044237,GO:0044238,GO:0044260,GO:0044267,GO:0044424,GO:…	ko:K06128,ko:K06130,ko:K06999	ko00564,ko05231,map00564,map05231	Abhydrolase_2	OTHER	1	0	NA	NA	NA	NA	NA	NA
337548	By MS/MS	By MS/MS	By MS/MS	By MS/MS	By MS/MS	By MS/MS	126290000	160710000	244130000	355190000	1299900000	1301700000	244950000	187160000	191310000	161740000	128480000	136140000	82508.K1VWG2	7.81e-98	291	COG0563@1|root,KOG3079@2759|Eukaryota,38HJ3@33154|Opisthokonta,3NVA4@4751|Fungi,3UY90@5204|Basidiomycota,3VE3D@5234|Tremellales	4751|Fungi	F	Catalyzes the phosphorylation of pyrimidine nucleoside monophosphates at the expense of ATP. Plays an important role in de novo pyrimidine nucleotide biosynthesis. Has preference for UMP and dUMP as phosphate acceptors, but can also use CMP, dCMP and AMP	URA6	GO:0003674,GO:0003824,GO:0004017,GO:0005575,GO:0005622,GO:0005623,GO:0005634,GO:0005737,GO:0006139,GO:0006206,GO:0006207,GO:0006725,GO:0006753,GO:0006793,GO:0006796,GO:0006807,GO:0008150,GO:0008152,GO:0009041,GO:0009058,GO:0009112,GO:0009117,GO:0009123,GO:0009165,GO:0009987,GO:0016301,GO:0016310,GO:0016740,GO:0016772,GO:0016776,GO:0018130,GO:0019205,GO:0019438,GO:0019637,GO:0019856,GO:0034641,GO:…	ko:K13800	ko00240,ko00983,ko01100,map00240,map00983,map01100	ADK	OTHER	1	0	NA	NA	NA	NA	NA	NA
337738	By matching	By MS/MS	By matching	By matching	By MS/MS	By MS/MS	5342000	16504000	4499800	4102300	58293000	65335000	0	4541900	0	0	3623900	6424500	5207.AAW46556	1.72e-283	809	KOG0301@1|root,KOG0301@2759|Eukaryota,38BSR@33154|Opisthokonta,3NUQN@4751|Fungi,3UYEE@5204|Basidiomycota,3VCQX@5234|Tremellales	4751|Fungi	I	Phospholipase A-2-activating protein	NA	NA	ko:K14018	ko04141,map04141	PFU,PUL,WD40	OTHER	0.999855	0.000169	NA	NA	NA	NA	NA	NA
337748	By MS/MS	By MS/MS	By MS/MS	By MS/MS	By MS/MS	By MS/MS	230300000	867470000	222750000	562040000	1214400000	598260000	27351000	55334000	25345000	32905000	28773000	18302000	552467.XP_003192274.1	0	1562	COG0567@1|root,KOG0450@2759|Eukaryota,38FJ2@33154|Opisthokonta,3NV83@4751|Fungi,3UZF4@5204|Basidiomycota,3VD77@5234|Tremellales	4751|Fungi	C	2-oxoglutarate dehydrogenase N-terminus	KGD1	GO:0003674,GO:0003824,GO:0004591,GO:0005575,GO:0005622,GO:0005623,GO:0005737,GO:0005739,GO:0005759,GO:0005947,GO:0006082,GO:0006091,GO:0006099,GO:0006101,GO:0006103,GO:0008150,GO:0008152,GO:0009060,GO:0009295,GO:0009353,GO:0009987,GO:0015980,GO:0016491,GO:0016624,GO:0016903,GO:0016999,GO:0017144,GO:0019752,GO:0030062,GO:0031974,GO:0032991,GO:0042645,GO:0043226,GO:0043227,GO:0043228,GO:0043229,GO:…	ko:K00164	ko00020,ko00310,ko00380,ko01100,ko01110,ko01120,ko01130,ko01200,map00020,map00310,map00380,map01100,map01110,map01120,map01130,map01200	2-oxogl_dehyd_N,E1_dh,OxoGdeHyase_C,Transket_pyr	OTHER	1	0	NA	NA	NA	NA	NA	NA
337762	By MS/MS	By MS/MS	By MS/MS	By MS/MS	By MS/MS	By MS/MS	60129000	271470000	76927000	263260000	551400000	222360000	26046000	48078000	27664000	58187000	32924000	30563000	82508.K1V091	1.95e-167	483	COG0183@1|root,KOG1389@2759|Eukaryota,38F89@33154|Opisthokonta,3NX2U@4751|Fungi,3V00E@5204|Basidiomycota,3VHGE@5234|Tremellales	4751|Fungi	I	Thiolase, N-terminal domain	NA	NA	ko:K07513	ko00071,ko00280,ko00592,ko01040,ko01100,ko01110,ko01130,ko01212,ko03320,ko04146,map00071,map00280,map00592,map01040,map01100,map01110,map01130,map01212,map03320,map04146	Thiolase_C,Thiolase_N	OTHER	1	0	NA	NA	NA	NA	NA	NA
337812	By matching	By MS/MS	NA	NA	By MS/MS	By MS/MS	2488700	7339500	0	0	15504000	13042000	0	0	0	0	0	0	82508.K1W1H4	1.13e-125	370	COG0667@1|root,KOG1575@2759|Eukaryota,38F9P@33154|Opisthokonta,3NWNE@4751|Fungi,3UZ1P@5204|Basidiomycota,3VD9P@5234|Tremellales	4751|Fungi	C	Aldo/keto reductase family	NA	GO:0003674,GO:0003824,GO:0004033,GO:0005575,GO:0005622,GO:0005623,GO:0005634,GO:0006081,GO:0006725,GO:0006766,GO:0006767,GO:0006807,GO:0008150,GO:0008152,GO:0009058,GO:0009110,GO:0009987,GO:0016491,GO:0016614,GO:0016616,GO:0017144,GO:0018130,GO:0019438,GO:0034641,GO:0042364,GO:0042816,GO:0042817,GO:0042819,GO:0042821,GO:0043226,GO:0043227,GO:0043229,GO:0043231,GO:0044237,GO:0044249,GO:0044271,GO:…	ko:K05275	ko00750,ko01100,ko01120,map00750,map01100,map01120	Aldo_ket_red	OTHER	0.999981	7.5e-05	NA	NA	NA	NA	NA	NA
337827	By matching	By matching	By matching	By matching	By matching	By MS/MS	0	0	0	0	10986000	36813000	0	0	0	0	0	0	176275.XP_008603263.1	1.12e-66	205	COG5262@1|root,KOG1756@2759|Eukaryota,3A1K0@33154|Opisthokonta,3P2TD@4751|Fungi,3QU61@4890|Ascomycota,219C3@147550|Sordariomycetes,3THYX@5125|Hypocreales	4751|Fungi	B	Histone H2A	HTA1	GO:0000070,GO:0000122,GO:0000228,GO:0000278,GO:0000280,GO:0000775,GO:0000781,GO:0000784,GO:0000785,GO:0000786,GO:0000788,GO:0000790,GO:0000792,GO:0000819,GO:0003674,GO:0003676,GO:0003677,GO:0005488,GO:0005575,GO:0005622,GO:0005623,GO:0005634,GO:0005657,GO:0005694,GO:0005720,GO:0005721,GO:0005724,GO:0006139,GO:0006259,GO:0006281,GO:0006282,GO:0006323,GO:0006325,GO:0006333,GO:0006342,GO:0006355,GO:…	ko:K11251	ko04217,ko05034,ko05322,map04217,map05034,map05322	Histone,Histone_H2A_C	OTHER	1	0	NA	NA	NA	NA	NA	NA
337938	NA	NA	NA	NA	NA	By MS/MS	0	0	0	0	0	0	0	0	0	0	0	0	82508.K1WR04	2.47e-188	536	COG2730@1|root,2QPYU@2759|Eukaryota,38DPE@33154|Opisthokonta,3NV8Y@4751|Fungi,3UXUZ@5204|Basidiomycota,3VESV@5234|Tremellales	4751|Fungi	G	Belongs to the glycosyl hydrolase 5 (cellulase A) family	exgA	GO:0000003,GO:0000272,GO:0000322,GO:0000323,GO:0000324,GO:0000746,GO:0000747,GO:0000935,GO:0003006,GO:0003674,GO:0003824,GO:0004338,GO:0004553,GO:0005488,GO:0005515,GO:0005575,GO:0005576,GO:0005618,GO:0005619,GO:0005622,GO:0005623,GO:0005628,GO:0005737,GO:0005773,GO:0005856,GO:0005886,GO:0005937,GO:0005975,GO:0005976,GO:0006073,GO:0007049,GO:0007155,GO:0008150,GO:0008152,GO:0008422,GO:0009056,GO:…	ko:K01210	ko00500,map00500	Cellulase	OTHER	1	0	NA	GH	GH5	GH5_9	GH5:43.1	GH5*1
337970	By MS/MS	By MS/MS	By MS/MS	By MS/MS	By MS/MS	By MS/MS	102790000	197120000	111190000	89123000	246830000	163590000	23349000	25592000	25704000	15274000	12819000	10945000	82508.K1VG47	2.11e-238	664	KOG2297@1|root,KOG2297@2759|Eukaryota,38DZM@33154|Opisthokonta,3NWCK@4751|Fungi,3UY3N@5204|Basidiomycota,3VDSS@5234|Tremellales	4751|Fungi	J	eIF4-gamma/eIF5/eIF2-epsilon	NA	NA	NA	NA	W2	OTHER	1	2e-06	NA	NA	NA	NA	NA	NA
338015	By matching	By matching	By matching	By matching	By MS/MS	By MS/MS	985630	4223800	670370	8024100	42345000	27043000	0	1584100	0	4753500	4463200	5623000	82508.K1W8E5	3.66e-105	318	KOG4205@1|root,KOG4205@2759|Eukaryota,38H1X@33154|Opisthokonta,3NXXZ@4751|Fungi,3UZJ9@5204|Basidiomycota,3VCRP@5234|Tremellales	4751|Fungi	A	RNA recognition motif	NA	GO:0003674,GO:0003676,GO:0003723,GO:0003729,GO:0003730,GO:0005488,GO:0005575,GO:0005622,GO:0005623,GO:0005634,GO:0005654,GO:0005737,GO:0005849,GO:0006139,GO:0006378,GO:0006379,GO:0006396,GO:0006397,GO:0006725,GO:0006807,GO:0008150,GO:0008152,GO:0009607,GO:0009719,GO:0009987,GO:0010467,GO:0010494,GO:0016070,GO:0016071,GO:0031123,GO:0031124,GO:0031974,GO:0031981,GO:0032991,GO:0034641,GO:0035770,GO:…	ko:K14411	ko03015,map03015	RRM_1	OTHER	1	0	NA	NA	NA	NA	NA	NA
338078	NA	By MS/MS	NA	NA	By MS/MS	NA	0	0	0	0	20289000	0	0	0	0	0	0	0	5207.AAW41939	0	1028	COG3590@1|root,KOG3624@2759|Eukaryota,38BNF@33154|Opisthokonta,3NWJF@4751|Fungi,3UY5F@5204|Basidiomycota,3VEPD@5234|Tremellales	4751|Fungi	E	Endothelin-converting enzyme 1	NA	NA	ko:K01415	NA	Peptidase_M13,Peptidase_M13_N	OTHER	0.999681	0.000305	NA	NA	NA	NA	NA	NA
338116	NA	NA	NA	NA	By MS/MS	NA	0	0	0	0	3050400	0	0	0	0	0	0	0	82508.K1WLA0	0	1205	KOG0650@1|root,KOG0650@2759|Eukaryota,38DR5@33154|Opisthokonta,3NU5U@4751|Fungi,3UYRC@5204|Basidiomycota,3VEUN@5234|Tremellales	4751|Fungi	J	Component of the NOP7 complex, which is required for maturation of the 25S and 5.8S ribosomal RNAs and formation of the 60S ribosome	ERB1	GO:0000463,GO:0000470,GO:0003674,GO:0003676,GO:0003723,GO:0005488,GO:0005575,GO:0005622,GO:0005623,GO:0005634,GO:0005730,GO:0006139,GO:0006364,GO:0006396,GO:0006725,GO:0006807,GO:0008150,GO:0008152,GO:0009987,GO:0010467,GO:0016070,GO:0016072,GO:0019843,GO:0022613,GO:0030684,GO:0030686,GO:0030687,GO:0031974,GO:0031981,GO:0032991,GO:0034470,GO:0034641,GO:0034660,GO:0035690,GO:0042221,GO:0042254,GO:…	ko:K14824	NA	BOP1NT,WD40	OTHER	1	0	NA	NA	NA	NA	NA	NA
338143	NA	NA	NA	NA	NA	By MS/MS	0	0	0	0	0	0	0	0	0	0	0	0	82508.K1V2V0	6.83e-114	341	KOG2131@1|root,KOG2131@2759|Eukaryota,38DJR@33154|Opisthokonta,3Q0YM@4751|Fungi,3VA4V@5204|Basidiomycota,3VFM4@5234|Tremellales	4751|Fungi	BT	JmjC domain, hydroxylase	NA	NA	NA	NA	JmjC	OTHER	1	1.6e-05	NA	NA	NA	NA	NA	NA
338263	By MS/MS	By MS/MS	By MS/MS	By MS/MS	By MS/MS	By MS/MS	457690000	812210000	349260000	1048900000	2035800000	2123300000	120700000	99378000	121420000	103900000	84232000	119700000	82508.K1VWW7	1.51e-99	289	COG0105@1|root,KOG0888@2759|Eukaryota,3A1MB@33154|Opisthokonta,3P274@4751|Fungi,3V0BP@5204|Basidiomycota,3VGUG@5234|Tremellales	4751|Fungi	F	NDK	ndk1	GO:0003674,GO:0003824,GO:0004550,GO:0005575,GO:0005576,GO:0005622,GO:0005623,GO:0005737,GO:0005739,GO:0005740,GO:0005758,GO:0005829,GO:0006139,GO:0006165,GO:0006213,GO:0006220,GO:0006221,GO:0006241,GO:0006725,GO:0006753,GO:0006793,GO:0006796,GO:0006807,GO:0006950,GO:0006974,GO:0008150,GO:0008152,GO:0009058,GO:0009116,GO:0009117,GO:0009119,GO:0009132,GO:0009141,GO:0009142,GO:0009147,GO:0009148,GO:…	ko:K00940	ko00230,ko00240,ko00983,ko01100,ko01110,ko01130,ko04016,map00230,map00240,map00983,map01100,map01110,map01130,map04016	NDK	OTHER	1	0	NA	NA	NA	NA	NA	NA
338318	By matching	By matching	By MS/MS	By matching	By MS/MS	By MS/MS	12215000	2817900	1808000	3412400	16557000	12614000	5230300	0	0	0	1160600	2616100	5217.XP_007000790.1	1.07e-47	154	KOG1110@1|root,KOG1110@2759|Eukaryota,3A5SG@33154|Opisthokonta,3Q195@4751|Fungi,3VA5J@5204|Basidiomycota,3VH3S@5234|Tremellales	4751|Fungi	S	Belongs to the cytochrome b5 family	NA	NA	NA	NA	Cyt-b5	OTHER	1	0	NA	NA	NA	NA	NA	NA
338448	By matching	By MS/MS	By matching	By MS/MS	By MS/MS	By matching	7268300	27663000	7980000	21559000	30718000	7603500	0	8701200	0	6872500	2414600	0	5217.XP_007005326.1	5.21e-131	385	COG0414@1|root,KOG3042@2759|Eukaryota,38FGI@33154|Opisthokonta,3NV6K@4751|Fungi,3UZNQ@5204|Basidiomycota,3VDET@5234|Tremellales	4751|Fungi	H	Pantoate-beta-alanine ligase	pan6	GO:0003674,GO:0003824,GO:0004592,GO:0005575,GO:0005622,GO:0005623,GO:0005634,GO:0005737,GO:0006082,GO:0006520,GO:0006573,GO:0006575,GO:0006732,GO:0006766,GO:0006767,GO:0006807,GO:0008150,GO:0008152,GO:0009058,GO:0009081,GO:0009108,GO:0009110,GO:0009987,GO:0015939,GO:0015940,GO:0016053,GO:0016874,GO:0016879,GO:0016881,GO:0019752,GO:0032787,GO:0033317,GO:0034641,GO:0042364,GO:0042398,GO:0043226,GO:…	ko:K01918	ko00410,ko00770,ko01100,ko01110,map00410,map00770,map01100,map01110	Pantoate_ligase	OTHER	1	3e-06	NA	NA	NA	NA	NA	NA
338460	By MS/MS	By MS/MS	By MS/MS	NA	By MS/MS	By matching	16024000	14941000	15062000	0	83532000	45214000	11570000	4753200	10175000	0	8811100	6902800	82508.K1VX03	3.22e-32	114	KOG1733@1|root,KOG1733@2759|Eukaryota,3A8DD@33154|Opisthokonta,3P6U7@4751|Fungi,3V26S@5204|Basidiomycota,3VFKU@5234|Tremellales	4751|Fungi	U	Tim10/DDP family zinc finger	TIM13	GO:0003674,GO:0005215,GO:0005575,GO:0005622,GO:0005623,GO:0005737,GO:0005739,GO:0005740,GO:0005758,GO:0006605,GO:0006626,GO:0006810,GO:0006839,GO:0006886,GO:0006996,GO:0007005,GO:0007006,GO:0007007,GO:0008104,GO:0008150,GO:0008565,GO:0009987,GO:0015031,GO:0015833,GO:0016020,GO:0016021,GO:0016043,GO:0017038,GO:0031224,GO:0031967,GO:0031970,GO:0031974,GO:0031975,GO:0032991,GO:0033036,GO:0033365,GO:…	ko:K17781	NA	zf-Tim10_DDP	OTHER	1	0	NA	NA	NA	NA	NA	NA
338486	By MS/MS	By MS/MS	By MS/MS	By MS/MS	By MS/MS	By MS/MS	94257000	292940000	94523000	193990000	639700000	570140000	26745000	38404000	22912000	37579000	35824000	44163000	82508.K1VHP2	2.16e-281	778	COG0436@1|root,KOG0258@2759|Eukaryota,38H3G@33154|Opisthokonta,3NU5I@4751|Fungi,3UZ38@5204|Basidiomycota,3VCW4@5234|Tremellales	4751|Fungi	E	Aminotransferase class I and II	ALT1	GO:0001300,GO:0001505,GO:0003674,GO:0003824,GO:0004021,GO:0005575,GO:0005622,GO:0005623,GO:0005634,GO:0005737,GO:0005739,GO:0006082,GO:0006520,GO:0006522,GO:0006523,GO:0006524,GO:0006536,GO:0006537,GO:0006807,GO:0007568,GO:0007569,GO:0008150,GO:0008152,GO:0008483,GO:0008652,GO:0009056,GO:0009058,GO:0009063,GO:0009064,GO:0009078,GO:0009079,GO:0009080,GO:0009084,GO:0009987,GO:0016053,GO:0016054,GO:…	ko:K00814	ko00220,ko00250,ko00710,ko01100,ko01120,ko01200,ko01210,ko01230,map00220,map00250,map00710,map01100,map01120,map01200,map01210,map01230	Aminotran_1_2	OTHER	1	0	NA	NA	NA	NA	NA	NA
338519	By MS/MS	By MS/MS	By MS/MS	By MS/MS	By MS/MS	By MS/MS	8110000	33658000	8955400	43590000	100010000	108780000	0	12267000	0	3588600	5357700	8644400	5217.XP_007001955.1	1.39e-174	494	COG4286@1|root,KOG2948@2759|Eukaryota,38BVY@33154|Opisthokonta,3NVK7@4751|Fungi,3UZ5R@5204|Basidiomycota,3VDW3@5234|Tremellales	4751|Fungi	S	Uncharacterised protein family (UPF0160)	NA	GO:0003674,GO:0003824,GO:0005575,GO:0005622,GO:0005623,GO:0005634,GO:0005737,GO:0005739,GO:0016787,GO:0043226,GO:0043227,GO:0043229,GO:0043231,GO:0044424,GO:0044444,GO:0044464	NA	NA	UPF0160	OTHER	1	0	NA	NA	NA	NA	NA	NA
338586	By MS/MS	By MS/MS	By MS/MS	By MS/MS	By MS/MS	By MS/MS	11389000	75168000	15123000	51943000	69297000	77199000	0	16599000	10945000	9477000	5784000	10302000	40483.S8EV26	1.97e-227	635	COG2421@1|root,2QRMK@2759|Eukaryota,38FKR@33154|Opisthokonta,3NWI6@4751|Fungi,3V035@5204|Basidiomycota,2259X@155619|Agaricomycetes,3H2J5@355688|Agaricomycetes incertae sedis	4751|Fungi	C	Acetamidase formamidase	NA	NA	ko:K01455	ko00460,ko00630,ko00910,ko01200,map00460,map00630,map00910,map01200	FmdA_AmdA	OTHER	1	0	NA	NA	NA	NA	NA	NA
338605	By MS/MS	By MS/MS	By MS/MS	By MS/MS	By MS/MS	By MS/MS	4305500000	2226400000	3757100000	20510000000	46774000000	81159000000	790460000	304300000	892000000	1845100000	2372800000	5479300000	82508.K1VL51	3.91e-292	819	2CMA6@1|root,2QPS4@2759|Eukaryota,38F5I@33154|Opisthokonta,3NWVA@4751|Fungi,3UXZX@5204|Basidiomycota,3VD6H@5234|Tremellales	4751|Fungi	S	Domain of unknown function (DUF1929)	NA	NA	ko:K20929	NA	DUF1929,Glyoxal_oxid_N	OTHER	1	0	NA	AA	AA5	AA5_1	AA5:2.1	AA5*4
338614	By matching	By MS/MS	By matching	NA	By MS/MS	By MS/MS	1708200	6198200	2501000	0	1148700000	3045600000	0	0	0	0	196450000	705060000	82508.K1W6D8	0	2423	COG5307@1|root,KOG0929@2759|Eukaryota,38B79@33154|Opisthokonta,3NU1X@4751|Fungi,3UY5V@5204|Basidiomycota,3VE0Z@5234|Tremellales	4751|Fungi	U	Domain of unknown function (DUF1981)	SEC7	GO:0000045,GO:0000137,GO:0003674,GO:0005085,GO:0005086,GO:0005488,GO:0005515,GO:0005575,GO:0005622,GO:0005623,GO:0005634,GO:0005635,GO:0005737,GO:0005768,GO:0005770,GO:0005794,GO:0005795,GO:0005798,GO:0005802,GO:0005829,GO:0005938,GO:0006810,GO:0006886,GO:0006888,GO:0006891,GO:0006914,GO:0006996,GO:0007033,GO:0008104,GO:0008150,GO:0008152,GO:0009056,GO:0009987,GO:0012505,GO:0015031,GO:0015833,GO:…	ko:K18442	ko04144,map04144	DCB,DUF1981,Sec7,Sec7_N	OTHER	0.99998	6.5e-05	NA	NA	NA	NA	NA	NA
338804	By MS/MS	By MS/MS	By MS/MS	By MS/MS	By MS/MS	By MS/MS	138280000	108350000	42029000	353400000	2097600000	627150000	76940000	42257000	25659000	28550000	229770000	97602000	82508.K1WJG8	5.29e-50	159	COG1997@1|root,KOG0402@2759|Eukaryota,3A5SK@33154|Opisthokonta,3P404@4751|Fungi,3V1BE@5204|Basidiomycota,3VFPR@5234|Tremellales	4751|Fungi	J	Ribosomal L37ae protein family	RPL43	GO:0002181,GO:0003674,GO:0003735,GO:0005198,GO:0005575,GO:0005622,GO:0005623,GO:0005737,GO:0005829,GO:0005840,GO:0006412,GO:0006518,GO:0006807,GO:0008150,GO:0008152,GO:0009058,GO:0009059,GO:0009987,GO:0010467,GO:0015934,GO:0019538,GO:0022625,GO:0022626,GO:0032991,GO:0034641,GO:0034645,GO:0043043,GO:0043170,GO:0043226,GO:0043228,GO:0043229,GO:0043232,GO:0043603,GO:0043604,GO:0044237,GO:0044238,GO:…	ko:K02921	ko03010,map03010	Ribosomal_L37ae	OTHER	1	7e-06	NA	NA	NA	NA	NA	NA
338999	By MS/MS	By MS/MS	By MS/MS	By MS/MS	By MS/MS	By MS/MS	685300000	1187900000	740770000	3062800000	6217600000	2495200000	203000000	236410000	230040000	375060000	368140000	191320000	82508.K1VEV3	1.26e-111	324	COG4352@1|root,KOG3295@2759|Eukaryota,39QV9@33154|Opisthokonta,3P222@4751|Fungi,3V0JJ@5204|Basidiomycota,3VDJU@5234|Tremellales	4751|Fungi	J	Ribosomal protein L13e	rpl13	GO:0002181,GO:0003674,GO:0003676,GO:0003723,GO:0003735,GO:0005198,GO:0005488,GO:0005575,GO:0005622,GO:0005623,GO:0005737,GO:0005829,GO:0005840,GO:0006412,GO:0006518,GO:0006807,GO:0006914,GO:0008150,GO:0008152,GO:0009056,GO:0009058,GO:0009059,GO:0009986,GO:0009987,GO:0010467,GO:0015934,GO:0016236,GO:0019538,GO:0022625,GO:0022626,GO:0032991,GO:0034641,GO:0034645,GO:0043043,GO:0043170,GO:0043226,GO:…	ko:K02873	ko03010,map03010	Ribosomal_L13e	OTHER	1	0	NA	NA	NA	NA	NA	NA
339152	By MS/MS	By MS/MS	By MS/MS	By matching	By MS/MS	By MS/MS	8566500	7417700	22292000	18231000	66500000	48865000	4939500	5612500	0	0	9251800	0	5207.AAW43300	7.49e-157	464	COG0484@1|root,KOG0624@2759|Eukaryota,38BUQ@33154|Opisthokonta,3NWTW@4751|Fungi,3UXZV@5204|Basidiomycota,3VDHK@5234|Tremellales	4751|Fungi	O	DnaJ molecular chaperone homology domain	NA	NA	ko:K09523	ko04141,ko05164,map04141,map05164	DnaJ,TPR_16,TPR_19,TPR_8	SP	0.000287	0.999657	CS pos: 19-20. Pr: 0.9815	NA	NA	NA	NA	NA
339202	NA	NA	NA	By matching	By MS/MS	By matching	0	0	0	0	5509600	0	0	0	0	0	0	0	82508.K1VPZ5	0	978	COG0369@1|root,KOG1158@2759|Eukaryota,38BIN@33154|Opisthokonta,3NUZ8@4751|Fungi,3UYKZ@5204|Basidiomycota,3VE6C@5234|Tremellales	4751|Fungi	C	This enzyme is required for electron transfer from NADP to cytochrome P450 in microsomes. It can also provide electron transfer to heme oxygenase and cytochrome B5. Involved in ergosterol biosynthesis	cprA	GO:0003674,GO:0003824,GO:0003958,GO:0005575,GO:0005622,GO:0005623,GO:0005737,GO:0005739,GO:0005740,GO:0005741,GO:0005783,GO:0005789,GO:0006066,GO:0006091,GO:0006629,GO:0006694,GO:0006696,GO:0008150,GO:0008152,GO:0008202,GO:0008204,GO:0008610,GO:0009055,GO:0009058,GO:0009987,GO:0012505,GO:0016020,GO:0016125,GO:0016126,GO:0016128,GO:0016129,GO:0016491,GO:0016651,GO:0016653,GO:0019867,GO:0022900,GO:…	ko:K00327	NA	FAD_binding_1,Flavodoxin_1,NAD_binding_1	OTHER	1	0	NA	NA	NA	NA	NA	NA
339440	NA	By matching	By matching	NA	By MS/MS	NA	0	6831200	3226900	0	12339000	0	0	0	0	0	0	0	82508.K1V6N9	7.82e-205	612	COG0464@1|root,COG1612@1|root,KOG0730@2759|Eukaryota,KOG2725@2759|Eukaryota,38CYE@33154|Opisthokonta,3NW8H@4751|Fungi,3UZPC@5204|Basidiomycota,3VEUI@5234|Tremellales	4751|Fungi	O	AAA domain (dynein-related subfamily)	AFG2	GO:0000166,GO:0003674,GO:0003824,GO:0005488,GO:0005524,GO:0005575,GO:0005622,GO:0005623,GO:0008144,GO:0008150,GO:0016462,GO:0016787,GO:0016817,GO:0016818,GO:0016887,GO:0017076,GO:0017111,GO:0022613,GO:0030554,GO:0030684,GO:0030687,GO:0032553,GO:0032555,GO:0032559,GO:0032991,GO:0035639,GO:0036094,GO:0042221,GO:0042254,GO:0042273,GO:0042493,GO:0043167,GO:0043168,GO:0044085,GO:0044464,GO:0050896,GO:…	ko:K14575	ko03008,map03008	AAA	OTHER	0.990298	0.009722	NA	NA	NA	NA	NA	NA
339467	NA	NA	NA	NA	NA	By MS/MS	0	0	0	0	0	0	0	0	0	0	0	0	82508.K1VQK9	4.01e-168	495	COG2175@1|root,KOG3888@2759|Eukaryota,39RY8@33154|Opisthokonta,3NX7E@4751|Fungi,3V0VQ@5204|Basidiomycota,3VDI4@5234|Tremellales	4751|Fungi	I	Taurine catabolism dioxygenase TauD, TfdA family	NA	GO:0005575,GO:0005622,GO:0005623,GO:0005737,GO:0005739,GO:0006996,GO:0007005,GO:0008150,GO:0009987,GO:0016043,GO:0043226,GO:0043227,GO:0043229,GO:0043231,GO:0044424,GO:0044444,GO:0044464,GO:0071840	ko:K00471	ko00310,map00310	DUF971,TauD	OTHER	1	1e-06	NA	NA	NA	NA	NA	NA
339468	By MS/MS	By MS/MS	By MS/MS	By MS/MS	By MS/MS	By MS/MS	647200000	340210000	454510000	141070000	1935500000	2006200000	317140000	104060000	226990000	106560000	229400000	362640000	5217.XP_007002492.1	8.46e-82	255	2CKE7@1|root,2RZ0M@2759|Eukaryota,3A0QR@33154|Opisthokonta,3P3H3@4751|Fungi,3V0I0@5204|Basidiomycota,3VFFX@5234|Tremellales	4751|Fungi	G	Alginate lyase	NA	NA	NA	NA	-	OTHER	1	0	NA	PL	PL14	NA	PL14:5.1	PL14*1
339576	NA	NA	NA	NA	By MS/MS	NA	0	0	0	0	5557600	0	0	0	0	0	0	0	82508.K1W1P6	3.98e-265	754	KOG2175@1|root,KOG2175@2759|Eukaryota,38EYR@33154|Opisthokonta,3NV03@4751|Fungi,3UYA3@5204|Basidiomycota,3VETI@5234|Tremellales	4751|Fungi	G	Component of IIS longevity pathway SMK-1	PSY2	GO:0000003,GO:0000075,GO:0000228,GO:0000785,GO:0000790,GO:0003674,GO:0005575,GO:0005622,GO:0005623,GO:0005634,GO:0005694,GO:0006282,GO:0006464,GO:0006470,GO:0006793,GO:0006796,GO:0006807,GO:0006950,GO:0006974,GO:0007049,GO:0007063,GO:0007154,GO:0007165,GO:0008047,GO:0008150,GO:0008152,GO:0008287,GO:0009893,GO:0009966,GO:0009968,GO:0009987,GO:0010564,GO:0010604,GO:0010639,GO:0010646,GO:0010648,GO:…	ko:K17491	ko04212,ko04922,map04212,map04922	SMK-1	OTHER	1	1e-06	NA	NA	NA	NA	NA	NA
339649	By MS/MS	By MS/MS	By MS/MS	By MS/MS	By MS/MS	By MS/MS	40691000	154530000	31759000	126410000	285910000	135000000	8254500	14529000	9307900	10373000	8184700	6455700	5217.XP_007004975.1	0	1261	COG0567@1|root,KOG0451@2759|Eukaryota,39KPS@33154|Opisthokonta,3NZ7K@4751|Fungi,3UY22@5204|Basidiomycota,3VGUF@5234|Tremellales	4751|Fungi	G	2-oxoglutarate dehydrogenase C-terminal	NA	NA	ko:K15791	NA	E1_dh,OxoGdeHyase_C,Transket_pyr	OTHER	1	0	NA	NA	NA	NA	NA	NA
339807	NA	By MS/MS	By matching	By matching	By matching	NA	0	9828200	1644300	4875300	5759500	0	0	3346200	0	1323500	0	0	552467.XP_003193289.1	0	935	COG5158@1|root,KOG1300@2759|Eukaryota,38G6Z@33154|Opisthokonta,3NVK8@4751|Fungi,3UYAS@5204|Basidiomycota,3VE4I@5234|Tremellales	4751|Fungi	U	Belongs to the STXBP unc-18 SEC1 family	sec1	GO:0000149,GO:0003674,GO:0005488,GO:0005515,GO:0005575,GO:0005623,GO:0005628,GO:0005886,GO:0005933,GO:0005934,GO:0005935,GO:0006810,GO:0006887,GO:0006904,GO:0006906,GO:0006996,GO:0008150,GO:0009987,GO:0010638,GO:0016020,GO:0016043,GO:0016050,GO:0016192,GO:0022406,GO:0030427,GO:0031338,GO:0031340,GO:0032879,GO:0032940,GO:0033043,GO:0042763,GO:0042764,GO:0044464,GO:0046903,GO:0048278,GO:0048284,GO:…	ko:K15292	ko04721,map04721	Sec1	OTHER	1	0	NA	NA	NA	NA	NA	NA
339858	By MS/MS	By MS/MS	By MS/MS	By MS/MS	By MS/MS	By MS/MS	72812000	198600000	87376000	60714000	114710000	78484000	25049000	38004000	28551000	9682600	9253800	10274000	1047171.Mycgr3P102841	2.42e-164	470	COG1064@1|root,KOG0023@2759|Eukaryota,38BI0@33154|Opisthokonta,3P137@4751|Fungi,3QQ7E@4890|Ascomycota,1ZY2W@147541|Dothideomycetes,3MJXM@451867|Dothideomycetidae	4751|Fungi	Q	Alcohol dehydrogenase GroES-like domain	NA	GO:0003674,GO:0003824,GO:0004022,GO:0005575,GO:0005622,GO:0005623,GO:0005737,GO:0006066,GO:0006067,GO:0006116,GO:0006139,GO:0006725,GO:0006732,GO:0006733,GO:0006734,GO:0006753,GO:0006793,GO:0006796,GO:0006807,GO:0008150,GO:0008152,GO:0009117,GO:0009987,GO:0016491,GO:0016614,GO:0016616,GO:0016999,GO:0017144,GO:0019362,GO:0019637,GO:0019674,GO:0034308,GO:0034641,GO:0044237,GO:0044238,GO:0044281,GO:…	ko:K13953	ko00010,ko00071,ko00350,ko00625,ko00626,ko00830,ko00980,ko00982,ko01100,ko01110,ko01120,ko01130,ko01220,map00010,map00071,map00350,map00625,map00626,map00830,map00980,map00982,map01100,map01110,map01120,map01130,map01220	ADH_N,ADH_zinc_N	OTHER	1	0	NA	NA	NA	NA	NA	NA
339979	By MS/MS	By MS/MS	By MS/MS	By MS/MS	By MS/MS	By MS/MS	10655000	10206000	9360600	12732000	45639000	32710000	6829200	0	0	0	8613600	0	82508.K1VH21	3.96e-198	566	COG0626@1|root,KOG0053@2759|Eukaryota,38CST@33154|Opisthokonta,3NU9U@4751|Fungi,3VA1W@5204|Basidiomycota,3VEWG@5234|Tremellales	4751|Fungi	E	Cys/Met metabolism PLP-dependent enzyme	CYS3	GO:0000096,GO:0000097,GO:0003674,GO:0003824,GO:0003962,GO:0004123,GO:0005488,GO:0005575,GO:0005622,GO:0005623,GO:0005634,GO:0005737,GO:0006082,GO:0006520,GO:0006534,GO:0006555,GO:0006790,GO:0006807,GO:0008144,GO:0008150,GO:0008152,GO:0008652,GO:0009058,GO:0009066,GO:0009067,GO:0009069,GO:0009070,GO:0009086,GO:0009092,GO:0009987,GO:0016053,GO:0016740,GO:0016765,GO:0016829,GO:0016846,GO:0017144,GO:…	ko:K01758	ko00260,ko00270,ko00450,ko01100,ko01130,ko01230,map00260,map00270,map00450,map01100,map01130,map01230	Cys_Met_Meta_PP	OTHER	0.999823	0.000222	NA	NA	NA	NA	NA	NA
339997	By MS/MS	By MS/MS	By MS/MS	By MS/MS	By MS/MS	By MS/MS	146720000	421450000	171340000	406390000	632090000	351660000	34308000	57337000	48584000	41892000	36099000	29388000	82508.K1VSF1	2.51e-153	439	COG1250@1|root,KOG2304@2759|Eukaryota,38CEZ@33154|Opisthokonta,3P0NT@4751|Fungi,3UZIR@5204|Basidiomycota,3VDHB@5234|Tremellales	4751|Fungi	I	3-hydroxyacyl-CoA dehydrogenase, C-terminal domain	NA	NA	ko:K00022,ko:K00074	ko00062,ko00071,ko00280,ko00281,ko00310,ko00360,ko00362,ko00380,ko00650,ko00930,ko01100,ko01110,ko01120,ko01130,ko01212,map00062,map00071,map00280,map00281,map00310,map00360,map00362,map00380,map00650,map00930,map01100,map01110,map01120,map01130,map01212	3HCDH,3HCDH_N	OTHER	1	7e-06	NA	NA	NA	NA	NA	NA
340120	NA	By matching	NA	By MS/MS	By MS/MS	By MS/MS	0	12228000	0	31262000	74441000	123230000	0	2954700	0	5249900	4656600	10960000	5217.XP_007004921.1	1.43e-116	342	COG0327@1|root,KOG4131@2759|Eukaryota,39U3J@33154|Opisthokonta,3P0V5@4751|Fungi,3V0U3@5204|Basidiomycota,3VF4U@5234|Tremellales	4751|Fungi	S	NIF3 (NGG1p interacting factor 3)	NA	GO:0003674,GO:0003824,GO:0003933,GO:0005575,GO:0005622,GO:0005623,GO:0005737,GO:0005739,GO:0016787,GO:0016810,GO:0016814,GO:0019238,GO:0043226,GO:0043227,GO:0043229,GO:0043231,GO:0044424,GO:0044444,GO:0044464	NA	NA	NIF3	OTHER	1	0	NA	NA	NA	NA	NA	NA
340331	By matching	By MS/MS	By MS/MS	By matching	By MS/MS	By MS/MS	6715800	15141000	2953200	5205200	41737000	31103000	3107500	3377400	0	2220400	3641800	2757400	552467.XP_003195828.1	6.74e-219	623	COG2145@1|root,2QS2M@2759|Eukaryota,38EVB@33154|Opisthokonta,3NTW4@4751|Fungi,3UYQK@5204|Basidiomycota,3VGMA@5234|Tremellales	4751|Fungi	H	Thiamine monophosphate synthase	THI6	GO:0003674,GO:0003824,GO:0004417,GO:0004789,GO:0005575,GO:0005622,GO:0005623,GO:0005737,GO:0005829,GO:0006725,GO:0006766,GO:0006767,GO:0006772,GO:0006790,GO:0006793,GO:0006796,GO:0006807,GO:0008150,GO:0008152,GO:0009058,GO:0009110,GO:0009228,GO:0009987,GO:0016301,GO:0016310,GO:0016740,GO:0016765,GO:0016772,GO:0016773,GO:0017144,GO:0018130,GO:0019438,GO:0034641,GO:0042364,GO:0042723,GO:0042724,GO:…	ko:K14154	ko00730,ko01100,map00730,map01100	HK,TMP-TENI	OTHER	1	0	NA	NA	NA	NA	NA	NA
340336	By MS/MS	By MS/MS	By MS/MS	By MS/MS	By MS/MS	By MS/MS	59254000	146010000	52371000	71424000	179490000	125670000	18483000	26383000	21182000	17497000	10095000	12274000	82508.K1VS32	2.17e-145	421	COG2130@1|root,KOG1196@2759|Eukaryota,39AU4@33154|Opisthokonta,3NWMF@4751|Fungi,3UZ5C@5204|Basidiomycota,3VHIH@5234|Tremellales	4751|Fungi	S	N-terminal domain of oxidoreductase	QOR1	GO:0005575,GO:0005622,GO:0005623,GO:0005737,GO:0005829,GO:0044424,GO:0044444,GO:0044464	ko:K07119	NA	ADH_N_2,ADH_zinc_N	OTHER	1	0	NA	NA	NA	NA	NA	NA
340369	By matching	By matching	By matching	By MS/MS	By MS/MS	By MS/MS	3365000	6293900	4967900	9045300	11366000	16290000	0	0	0	0	0	0	552467.XP_003192704.1	2.63e-102	298	COG0652@1|root,KOG0881@2759|Eukaryota,3A07C@33154|Opisthokonta,3P1TP@4751|Fungi,3V0AV@5204|Basidiomycota,3VEYC@5234|Tremellales	4751|Fungi	O	PPIases accelerate the folding of proteins. It catalyzes the cis-trans isomerization of proline imidic peptide bonds in oligopeptides	cyp1	GO:0000413,GO:0003674,GO:0003755,GO:0003824,GO:0005575,GO:0005622,GO:0005623,GO:0005634,GO:0005681,GO:0006457,GO:0006464,GO:0006807,GO:0008150,GO:0008152,GO:0009987,GO:0016853,GO:0016859,GO:0018193,GO:0018208,GO:0019538,GO:0032991,GO:0036211,GO:0043170,GO:0043226,GO:0043227,GO:0043229,GO:0043231,GO:0043412,GO:0044237,GO:0044238,GO:0044260,GO:0044267,GO:0044422,GO:0044424,GO:0044428,GO:0044446,GO:…	ko:K12733	ko03040,map03040	Pro_isomerase	OTHER	1	0	NA	NA	NA	NA	NA	NA
340446	By MS/MS	By MS/MS	By MS/MS	By MS/MS	By MS/MS	By MS/MS	563620000	1751400000	554490000	1676300000	2798000000	1976300000	72780000	111840000	74801000	94869000	76670000	67158000	82508.K1VHU4	0	902	KOG3717@1|root,KOG3717@2759|Eukaryota,38CAT@33154|Opisthokonta,3NZD8@4751|Fungi,3UYYW@5204|Basidiomycota,3VEFB@5234|Tremellales	4751|Fungi	I	Choline/Carnitine o-acyltransferase	NA	NA	ko:K00624	ko04146,map04146	Carn_acyltransf	OTHER	1	0	NA	NA	NA	NA	NA	NA
340464	By MS/MS	By MS/MS	By MS/MS	By MS/MS	By MS/MS	By MS/MS	30364000	93500000	31301000	79094000	199900000	118800000	12006000	17841000	13049000	13777000	12481000	10766000	82508.K1VG61	1.92e-184	520	COG0240@1|root,KOG2711@2759|Eukaryota,38E7F@33154|Opisthokonta,3NVN7@4751|Fungi,3UYX8@5204|Basidiomycota,3VCQN@5234|Tremellales	4751|Fungi	C	NAD-dependent glycerol-3-phosphate dehydrogenase N-terminus	GPD1	GO:0000166,GO:0003674,GO:0003824,GO:0004367,GO:0005488,GO:0005575,GO:0005622,GO:0005623,GO:0005634,GO:0005737,GO:0005739,GO:0005777,GO:0005829,GO:0005975,GO:0006066,GO:0006071,GO:0006072,GO:0006114,GO:0006116,GO:0006139,GO:0006605,GO:0006625,GO:0006725,GO:0006732,GO:0006733,GO:0006734,GO:0006753,GO:0006793,GO:0006796,GO:0006807,GO:0006810,GO:0006884,GO:0006886,GO:0006950,GO:0006970,GO:0006972,GO:…	ko:K00006	ko00564,ko01110,ko04011,map00564,map01110,map04011	NAD_Gly3P_dh_C,NAD_Gly3P_dh_N	OTHER	1	0	NA	NA	NA	NA	NA	NA
340650	NA	By matching	By matching	By MS/MS	By MS/MS	By MS/MS	0	2950600	754670	8368800	42096000	12989000	0	0	0	2567400	3209900	2483100	82508.K1VQY2	1.16e-266	763	COG5236@1|root,KOG2231@2759|Eukaryota,39EZR@33154|Opisthokonta,3NVAX@4751|Fungi,3UZK7@5204|Basidiomycota,3VD01@5234|Tremellales	4751|Fungi	O	zinc finger	NA	GO:0003674,GO:0003824,GO:0004842,GO:0005488,GO:0005575,GO:0005622,GO:0005623,GO:0005737,GO:0006325,GO:0006412,GO:0006414,GO:0006417,GO:0006464,GO:0006518,GO:0006807,GO:0006996,GO:0008150,GO:0008152,GO:0008270,GO:0009056,GO:0009057,GO:0009058,GO:0009059,GO:0009889,GO:0009987,GO:0010467,GO:0010468,GO:0010556,GO:0010608,GO:0016043,GO:0016567,GO:0016569,GO:0016570,GO:0016574,GO:0016740,GO:0019222,GO:…	ko:K22381	NA	zf-C3HC4_3	OTHER	1	2e-06	NA	NA	NA	NA	NA	NA
340709	NA	By matching	By matching	By MS/MS	By MS/MS	By matching	0	8925200	2312100	7286400	5677500	4010000	0	0	0	0	0	0	82508.K1VK52	5.98e-129	374	2BIUM@1|root,2S1EZ@2759|Eukaryota,38TCW@33154|Opisthokonta,3NZEB@4751|Fungi,3V13K@5204|Basidiomycota,3VEPR@5234|Tremellales	4751|Fungi	-	-	NA	NA	NA	NA	DUF4336	OTHER	1	6e-06	NA	NA	NA	NA	NA	NA
340799	By MS/MS	By matching	By MS/MS	By MS/MS	By MS/MS	By MS/MS	29096000	27805000	43654000	28443000	169240000	155580000	17152000	13067000	22009000	0	22058000	18390000	82508.K1VL18	1.09e-58	186	KOG4680@1|root,KOG4680@2759|Eukaryota,3A444@33154|Opisthokonta,3P3WJ@4751|Fungi,3V17W@5204|Basidiomycota,3VFAX@5234|Tremellales	4751|Fungi	S	Domain involved in innate immunity and lipid metabolism.	NA	NA	NA	NA	E1_DerP2_DerF2	OTHER	1	0	NA	NA	NA	NA	NA	NA
340800	By matching	By MS/MS	By matching	NA	By MS/MS	NA	3410000	10658000	3320100	0	16102000	0	0	4879400	0	0	2878400	0	5207.AAW41036	3.38e-59	189	COG2938@1|root,KOG3326@2759|Eukaryota,3A90K@33154|Opisthokonta,3NYI5@4751|Fungi,3V1PU@5204|Basidiomycota,3VFU4@5234|Tremellales	4751|Fungi	C	Plays an essential role in the assembly of succinate dehydrogenase (SDH), an enzyme complex (also referred to as respiratory complex II) that is a component of both the tricarboxylic acid (TCA) cycle and the mitochondrial electron transport chain, and which couples the oxidation of succinate to fumarate with the reduction of ubiquinone (coenzyme Q) to ubiquinol. Required for flavinylation (covale…	emi5	GO:0000003,GO:0003006,GO:0005575,GO:0005622,GO:0005623,GO:0005737,GO:0005739,GO:0005759,GO:0006082,GO:0006091,GO:0006099,GO:0006101,GO:0006119,GO:0006121,GO:0006139,GO:0006163,GO:0006355,GO:0006357,GO:0006464,GO:0006725,GO:0006753,GO:0006793,GO:0006796,GO:0006807,GO:0006996,GO:0007005,GO:0007049,GO:0008150,GO:0008152,GO:0009060,GO:0009117,GO:0009123,GO:0009126,GO:0009141,GO:0009144,GO:0009150,GO:…	ko:K18168,ko:K20352	NA	Sdh5	OTHER	1	1e-06	NA	NA	NA	NA	NA	NA
340855	By MS/MS	By MS/MS	By matching	By MS/MS	By MS/MS	NA	6044900	12039000	2978700	18778000	32124000	0	2697000	3425800	0	4541300	3297600	0	5207.AAW45486	5.69e-209	589	KOG0082@1|root,KOG0082@2759|Eukaryota,38C4P@33154|Opisthokonta,3NVBY@4751|Fungi,3UYMY@5204|Basidiomycota,3VD6K@5234|Tremellales	4751|Fungi	DT	G protein alpha subunit	GPA2	GO:0000003,GO:0000122,GO:0000166,GO:0000287,GO:0000429,GO:0000430,GO:0000433,GO:0001302,GO:0001403,GO:0001664,GO:0001678,GO:0001882,GO:0001883,GO:0003006,GO:0003674,GO:0003824,GO:0003924,GO:0004888,GO:0004930,GO:0005102,GO:0005488,GO:0005515,GO:0005525,GO:0005575,GO:0005622,GO:0005623,GO:0005737,GO:0005739,GO:0005813,GO:0005815,GO:0005829,GO:0005834,GO:0005856,GO:0005886,GO:0005938,GO:0006355,GO:…	ko:K04630	ko04015,ko04022,ko04024,ko04062,ko04071,ko04261,ko04360,ko04371,ko04540,ko04611,ko04670,ko04713,ko04723,ko04724,ko04725,ko04726,ko04727,ko04728,ko04730,ko04914,ko04915,ko04916,ko04921,ko04923,ko04924,ko04926,ko04934,ko04971,ko05012,ko05030,ko05032,ko05034,ko05133,ko05142,ko05145,ko05200,map04015,map04022,map04024,map04062,map04071,map04261,map04360,map04371,map04540,map04611,map04670,map04713,map…	G-alpha	OTHER	1	1e-06	NA	NA	NA	NA	NA	NA
340987	NA	NA	NA	NA	NA	By MS/MS	0	0	0	0	0	0	0	0	0	0	0	0	5217.XP_007006884.1	0	858	COG0308@1|root,KOG1047@2759|Eukaryota,38DQ5@33154|Opisthokonta,3NV5N@4751|Fungi,3UZY1@5204|Basidiomycota,3VEDT@5234|Tremellales	4751|Fungi	EIOV	Leukotriene A4 hydrolase, C-terminal	LAP2	GO:0000322,GO:0000323,GO:0000324,GO:0000328,GO:0003674,GO:0003824,GO:0004177,GO:0004301,GO:0005488,GO:0005575,GO:0005622,GO:0005623,GO:0005634,GO:0005737,GO:0005768,GO:0005770,GO:0005771,GO:0005773,GO:0005775,GO:0006508,GO:0006518,GO:0006629,GO:0006807,GO:0008104,GO:0008150,GO:0008152,GO:0008233,GO:0008235,GO:0008237,GO:0008238,GO:0008270,GO:0009056,GO:0009057,GO:0009987,GO:0012505,GO:0016787,GO:…	ko:K01254,ko:K15428	ko00480,ko00590,ko01100,map00480,map00590,map01100	Leuk-A4-hydro_C,Peptidase_M1	OTHER	0.999177	0.000854	NA	NA	NA	NA	NA	NA
341032	By MS/MS	By MS/MS	By MS/MS	By MS/MS	By MS/MS	By MS/MS	17218000	58991000	10365000	91795000	144330000	93378000	6418300	10367000	5358200	13609000	9092800	8577100	5217.XP_007003372.1	3.86999999999856e-312	857	KOG0032@1|root,KOG0032@2759|Eukaryota,39R57@33154|Opisthokonta,3NUAK@4751|Fungi,3UZ5P@5204|Basidiomycota,3VDUS@5234|Tremellales	4751|Fungi	T	Serine/Threonine protein kinases, catalytic domain	srk1	GO:0000166,GO:0003674,GO:0003824,GO:0004672,GO:0004674,GO:0004683,GO:0005488,GO:0005515,GO:0005516,GO:0005524,GO:0005575,GO:0005622,GO:0005623,GO:0005634,GO:0005730,GO:0005737,GO:0006464,GO:0006468,GO:0006793,GO:0006796,GO:0006807,GO:0006950,GO:0006970,GO:0006979,GO:0007154,GO:0007165,GO:0007231,GO:0007346,GO:0008144,GO:0008150,GO:0008152,GO:0009628,GO:0009987,GO:0010389,GO:0010515,GO:0010564,GO:…	ko:K08286	NA	Pkinase	OTHER	1	0	NA	NA	NA	NA	NA	NA
341063	By MS/MS	By MS/MS	By MS/MS	By MS/MS	By MS/MS	By MS/MS	30653000	91747000	27519000	57340000	166860000	97007000	12584000	17113000	12550000	7747800	10409000	9078300	5217.XP_007004966.1	2e-195	563	COG5064@1|root,KOG0166@2759|Eukaryota,38CKN@33154|Opisthokonta,3NU5E@4751|Fungi,3UXW7@5204|Basidiomycota,3VE9M@5234|Tremellales	4751|Fungi	U	Importin beta binding domain	cut15	GO:0000166,GO:0001882,GO:0001883,GO:0003674,GO:0005048,GO:0005215,GO:0005488,GO:0005525,GO:0005575,GO:0005622,GO:0005623,GO:0005634,GO:0005635,GO:0005643,GO:0005654,GO:0005730,GO:0005737,GO:0005819,GO:0005829,GO:0005856,GO:0006605,GO:0006606,GO:0006607,GO:0006612,GO:0006810,GO:0006886,GO:0006913,GO:0008104,GO:0008139,GO:0008150,GO:0008565,GO:0012505,GO:0015031,GO:0015630,GO:0015833,GO:0016020,GO:…	NA	NA	Arm,Arm_3,IBB	OTHER	1	0	NA	NA	NA	NA	NA	NA
341069	By MS/MS	By MS/MS	By MS/MS	By MS/MS	By MS/MS	By MS/MS	14070000	37985000	11547000	41351000	83781000	61978000	5628900	8546600	7627900	15909000	13080000	10828000	5217.XP_007006405.1	9.42e-137	394	COG2930@1|root,KOG1843@2759|Eukaryota,38FCU@33154|Opisthokonta,3NWAM@4751|Fungi,3UXUS@5204|Basidiomycota,3VEXC@5234|Tremellales	4751|Fungi	S	Las17-binding protein actin regulator	NA	GO:0001726,GO:0003674,GO:0003779,GO:0005488,GO:0005515,GO:0005543,GO:0005575,GO:0005622,GO:0005623,GO:0005737,GO:0005739,GO:0005829,GO:0005856,GO:0005886,GO:0005933,GO:0005935,GO:0005938,GO:0006810,GO:0006897,GO:0006996,GO:0007010,GO:0007015,GO:0008092,GO:0008150,GO:0008289,GO:0009987,GO:0015629,GO:0016020,GO:0016043,GO:0016192,GO:0022607,GO:0030029,GO:0030036,GO:0030427,GO:0030479,GO:0030863,GO:…	ko:K20523	NA	SH3_1,SH3_2,Ysc84	OTHER	0.999939	6.3e-05	NA	NA	NA	NA	NA	NA
341204	By MS/MS	By MS/MS	By MS/MS	By MS/MS	By MS/MS	By MS/MS	124810000	323880000	130780000	235430000	443540000	254590000	36448000	56228000	39574000	31301000	28180000	23448000	552467.XP_003193368.1	4.77e-126	360	KOG0084@1|root,KOG0084@2759|Eukaryota,38DXZ@33154|Opisthokonta,3NUNU@4751|Fungi,3UYKF@5204|Basidiomycota,3VEWM@5234|Tremellales	4751|Fungi	U	Rab subfamily of small GTPases	ypt1	GO:0000045,GO:0000139,GO:0000149,GO:0000407,GO:0003674,GO:0003824,GO:0003924,GO:0005488,GO:0005515,GO:0005575,GO:0005622,GO:0005623,GO:0005737,GO:0005739,GO:0005783,GO:0005789,GO:0005794,GO:0005795,GO:0005801,GO:0006139,GO:0006401,GO:0006725,GO:0006807,GO:0006810,GO:0006886,GO:0006888,GO:0006890,GO:0006900,GO:0006906,GO:0006914,GO:0006996,GO:0007033,GO:0007154,GO:0007165,GO:0007264,GO:0008104,GO:…	ko:K07874	ko05134,map05134	Ras	OTHER	1	0	NA	NA	NA	NA	NA	NA
341222	By matching	By matching	By matching	By MS/MS	By MS/MS	By MS/MS	816710	10761000	2466400	104090000	249480000	280130000	0	2930000	0	14809000	12571000	23968000	552467.XP_003193559.1	5.54e-128	374	2BPBK@1|root,2S1RM@2759|Eukaryota,3A3SU@33154|Opisthokonta,3P425@4751|Fungi,3V14C@5204|Basidiomycota,3VG95@5234|Tremellales	4751|Fungi	S	nad-p-binding protein	NA	NA	NA	NA	Epimerase,NAD_binding_10	OTHER	1	1.2e-05	NA	NA	NA	NA	NA	NA
341337	By MS/MS	By MS/MS	By MS/MS	By MS/MS	By MS/MS	By MS/MS	343430000	428170000	242810000	489880000	3758700000	1150500000	77580000	54146000	56631000	115750000	252920000	82140000	82508.K1VYC5	3.62e-115	332	COG2147@1|root,KOG1696@2759|Eukaryota,38E34@33154|Opisthokonta,3NUT0@4751|Fungi,3UY07@5204|Basidiomycota,3VCVR@5234|Tremellales	4751|Fungi	J	Belongs to the eukaryotic ribosomal protein eL19 family	RPL19B	GO:0002181,GO:0003674,GO:0003676,GO:0003723,GO:0003735,GO:0005198,GO:0005488,GO:0005575,GO:0005622,GO:0005623,GO:0005737,GO:0005829,GO:0005840,GO:0006412,GO:0006518,GO:0006807,GO:0008150,GO:0008152,GO:0009058,GO:0009059,GO:0009987,GO:0010467,GO:0015934,GO:0019538,GO:0022625,GO:0022626,GO:0030684,GO:0030687,GO:0032991,GO:0034641,GO:0034645,GO:0043043,GO:0043170,GO:0043226,GO:0043228,GO:0043229,GO:…	ko:K02885	ko03010,map03010	Ribosomal_L19e	OTHER	1	0	NA	NA	NA	NA	NA	NA
341398	By MS/MS	By MS/MS	By MS/MS	By MS/MS	By MS/MS	By MS/MS	14685000	12371000	14754000	16486000	9234100	35292000	9727000	4090500	10058000	4821700	0	7270300	82508.K1W0K5	7.57e-85	263	2CYG1@1|root,2S45F@2759|Eukaryota,39RIR@33154|Opisthokonta,3P24I@4751|Fungi,3V7XB@5204|Basidiomycota,3VFHU@5234|Tremellales	4751|Fungi	S	Gamma interferon inducible lysosomal thiol reductase (GILT)	NA	NA	NA	NA	GILT	SP	0.000378	0.999608	CS pos: 14-15. Pr: 0.9656	NA	NA	NA	NA	NA
341415	By matching	By matching	By MS/MS	By MS/MS	By MS/MS	By MS/MS	2191500	3418500	8199000	30530000	16675000	11852000	0	0	0	0	2258900	2020800	552467.XP_003191266.1	1.57e-89	267	COG1100@1|root,KOG0395@2759|Eukaryota,38K8T@33154|Opisthokonta,3NYZW@4751|Fungi,3V0M0@5204|Basidiomycota,3VGH8@5234|Tremellales	4751|Fungi	S	Ras subfamily of RAS small GTPases	RHB1	GO:0000166,GO:0001882,GO:0001883,GO:0003674,GO:0003824,GO:0003924,GO:0005488,GO:0005525,GO:0005575,GO:0005622,GO:0005623,GO:0005737,GO:0005829,GO:0005886,GO:0006810,GO:0006811,GO:0006812,GO:0006820,GO:0006865,GO:0007049,GO:0007050,GO:0007154,GO:0007165,GO:0007264,GO:0007346,GO:0008150,GO:0009987,GO:0010958,GO:0010963,GO:0015711,GO:0015802,GO:0015809,GO:0015819,GO:0015849,GO:0016020,GO:0016192,GO:…	ko:K07208	ko04072,ko04140,ko04150,ko04151,ko04152,ko04211,ko04218,ko04714,ko04910,ko04919,ko05165,ko05231,map04072,map04140,map04150,map04151,map04152,map04211,map04218,map04714,map04910,map04919,map05165,map05231	Ras	OTHER	1	0	NA	NA	NA	NA	NA	NA
341551	By matching	By MS/MS	By matching	By MS/MS	By MS/MS	By MS/MS	9266600	39409000	5929300	45505000	75554000	25967000	0	11047000	0	10273000	5690300	6151900	5286.M7WI10	8.21e-78	256	28MZB@1|root,2QUI6@2759|Eukaryota,38HPW@33154|Opisthokonta,3NZ44@4751|Fungi,3V0FB@5204|Basidiomycota	4751|Fungi	S	von Willebrand factor (vWF) type A domain	NA	NA	NA	NA	vWA-TerF-like	OTHER	0.999852	0.000175	NA	NA	NA	NA	NA	NA
341612	By MS/MS	By MS/MS	By MS/MS	By MS/MS	By MS/MS	By MS/MS	47539000	153700000	48735000	201840000	302740000	195630000	11516000	20491000	15510000	19606000	13620000	11778000	552467.XP_003193066.1	9.46e-283	788	2C5MI@1|root,2QRAF@2759|Eukaryota,38FAW@33154|Opisthokonta,3NVCW@4751|Fungi,3UZ2P@5204|Basidiomycota,3VDZX@5234|Tremellales	4751|Fungi	U	Pleckstrin homology domain.	NA	GO:0003674,GO:0005488,GO:0005543,GO:0005575,GO:0005622,GO:0005623,GO:0005737,GO:0005938,GO:0007009,GO:0008150,GO:0008289,GO:0009987,GO:0010256,GO:0016043,GO:0022607,GO:0032126,GO:0032956,GO:0032970,GO:0033043,GO:0035091,GO:0043167,GO:0043168,GO:0044085,GO:0044424,GO:0044444,GO:0044448,GO:0044464,GO:0050789,GO:0050794,GO:0051128,GO:0051285,GO:0051286,GO:0051493,GO:0061024,GO:0065007,GO:0070941,GO:…	NA	NA	PH	OTHER	1	1e-06	NA	NA	NA	NA	NA	NA
341715	By MS/MS	By MS/MS	By MS/MS	By MS/MS	By MS/MS	By MS/MS	35795000	109540000	53113000	34664000	74156000	58713000	13250000	22134000	15337000	4274700	4580300	5474100	5207.AAW45319	1.11e-131	381	COG1028@1|root,KOG0725@2759|Eukaryota,3905U@33154|Opisthokonta,3NVVN@4751|Fungi,3V036@5204|Basidiomycota,3VDFH@5234|Tremellales	4751|Fungi	Q	KR domain	SPS19	GO:0000003,GO:0003006,GO:0003674,GO:0003824,GO:0005575,GO:0005622,GO:0005623,GO:0005737,GO:0005777,GO:0005782,GO:0006082,GO:0006629,GO:0006631,GO:0007049,GO:0008150,GO:0008152,GO:0008670,GO:0009056,GO:0009062,GO:0009653,GO:0009987,GO:0016042,GO:0016054,GO:0016491,GO:0016627,GO:0016628,GO:0019752,GO:0019953,GO:0022402,GO:0022413,GO:0022414,GO:0030154,GO:0030435,GO:0030437,GO:0031907,GO:0031974,GO:…	ko:K13237	ko04146,map04146	adh_short_C2	OTHER	1	0	NA	NA	NA	NA	NA	NA
341744	By MS/MS	By MS/MS	By MS/MS	By MS/MS	By MS/MS	By MS/MS	9930300	20647000	11974000	21570000	57977000	64669000	5183200	5729800	6413600	8251400	6563000	9034000	5207.AAW42412	3.57e-158	449	COG0388@1|root,KOG0806@2759|Eukaryota,38TQE@33154|Opisthokonta,3NTXY@4751|Fungi,3UZMF@5204|Basidiomycota,3VCW0@5234|Tremellales	4751|Fungi	G	Carbon-nitrogen hydrolase	NIT3	GO:0003674,GO:0003824,GO:0005575,GO:0005622,GO:0005623,GO:0005737,GO:0005739,GO:0006082,GO:0006107,GO:0008150,GO:0008152,GO:0009636,GO:0009987,GO:0016787,GO:0016810,GO:0016811,GO:0019752,GO:0042221,GO:0043226,GO:0043227,GO:0043229,GO:0043231,GO:0043436,GO:0043648,GO:0044237,GO:0044281,GO:0044424,GO:0044444,GO:0044464,GO:0050152,GO:0050896,GO:0051716,GO:0070887,GO:0071704,GO:0097237,GO:0098754,GO:…	ko:K13566	ko00250,map00250	CN_hydrolase	OTHER	1	0	NA	NA	NA	NA	NA	NA
341923	By MS/MS	By MS/MS	By MS/MS	By MS/MS	By MS/MS	By MS/MS	36573000	111350000	50725000	181450000	209720000	147020000	38954000	58940000	49419000	29442000	44409000	35249000	82508.K1V8L8	3.53e-35	125	KOG4103@1|root,KOG4103@2759|Eukaryota,3A5K9@33154|Opisthokonta,3P68W@4751|Fungi,3V1NA@5204|Basidiomycota,3VFU1@5234|Tremellales	4751|Fungi	S	Mitochondrial ATP synthase g subunit	NA	NA	ko:K02140	ko00190,ko01100,ko04714,map00190,map01100,map04714	ATP-synt_G	OTHER	1	0	NA	NA	NA	NA	NA	NA
341933	By matching	By MS/MS	By MS/MS	By MS/MS	By MS/MS	By MS/MS	16518000	53892000	18845000	58026000	143370000	59408000	0	26485000	0	29251000	17530000	12699000	82508.K1VH60	5.22e-184	515	KOG0750@1|root,KOG0750@2759|Eukaryota,38DKN@33154|Opisthokonta,3NUAX@4751|Fungi,3UYH3@5204|Basidiomycota,3VE3A@5234|Tremellales	4751|Fungi	C	Belongs to the mitochondrial carrier (TC 2.A.29) family	YHM1	GO:0000002,GO:0001408,GO:0001409,GO:0003674,GO:0005215,GO:0005575,GO:0005622,GO:0005623,GO:0005737,GO:0005739,GO:0005740,GO:0005743,GO:0006810,GO:0006839,GO:0006862,GO:0006863,GO:0006873,GO:0006875,GO:0006879,GO:0006996,GO:0007005,GO:0008150,GO:0009987,GO:0015215,GO:0015216,GO:0015605,GO:0015748,GO:0015851,GO:0015854,GO:0015865,GO:0015931,GO:0015932,GO:0016020,GO:0016021,GO:0016043,GO:0019725,GO:…	NA	NA	Mito_carr	OTHER	1	1e-06	NA	NA	NA	NA	NA	NA
341989	NA	NA	NA	By matching	By MS/MS	By MS/MS	0	0	0	8911400	110920000	28908000	0	0	0	0	14023000	6347900	82508.K1V9X5	2.94e-132	392	COG5139@1|root,KOG1793@2759|Eukaryota,394VH@33154|Opisthokonta,3P0IY@4751|Fungi,3V12P@5204|Basidiomycota,3VEQC@5234|Tremellales	4751|Fungi	K	TFIIS helical bundle-like domain	IWS1	GO:0000414,GO:0000988,GO:0000989,GO:0000990,GO:0000991,GO:0001076,GO:0003674,GO:0005575,GO:0005622,GO:0005623,GO:0005634,GO:0005654,GO:0006139,GO:0006325,GO:0006342,GO:0006348,GO:0006351,GO:0006354,GO:0006355,GO:0006357,GO:0006366,GO:0006368,GO:0006403,GO:0006405,GO:0006406,GO:0006611,GO:0006725,GO:0006807,GO:0006810,GO:0006886,GO:0006913,GO:0006996,GO:0008023,GO:0008104,GO:0008150,GO:0008152,GO:…	ko:K17498	NA	Med26	OTHER	1	0	NA	NA	NA	NA	NA	NA
342037	NA	By MS/MS	NA	NA	NA	NA	0	5321400	0	0	0	0	0	0	0	0	0	0	5217.XP_007000784.1	8.53e-208	600	2C17K@1|root,2QTPC@2759|Eukaryota,38C8V@33154|Opisthokonta,3NUYY@4751|Fungi,3UYG8@5204|Basidiomycota,3VCZX@5234|Tremellales	4751|Fungi	K	Fungal specific transcription factor domain	NA	NA	NA	NA	Fungal_trans,Zn_clus	OTHER	1	2e-06	NA	NA	NA	NA	NA	NA
342071	By MS/MS	By MS/MS	By MS/MS	By MS/MS	By MS/MS	By MS/MS	260030000	244800000	335140000	1188800000	1696300000	2110200000	0	0	0	0	0	0	82508.K1WCM6	5.85e-226	644	COG0654@1|root,KOG3855@2759|Eukaryota,38FN2@33154|Opisthokonta,3NV68@4751|Fungi,3UYIY@5204|Basidiomycota,3VD8K@5234|Tremellales	4751|Fungi	CH	FAD-dependent monooxygenase required for the C5-ring hydroxylation during ubiquinone biosynthesis. Catalyzes the hydroxylation of 3-polyprenyl-4-hydroxybenzoic acid to 3- polyprenyl-4,5-dihydroxybenzoic acid. The electrons required for the hydroxylation reaction may be funneled indirectly from NADPH via a ferredoxin ferredoxin reductase system to COQ6	COQ6	GO:0003674,GO:0003824,GO:0004497,GO:0005575,GO:0005622,GO:0005623,GO:0005737,GO:0005739,GO:0005740,GO:0005743,GO:0006732,GO:0006733,GO:0006743,GO:0006744,GO:0008150,GO:0008152,GO:0008681,GO:0009058,GO:0009108,GO:0009987,GO:0016020,GO:0016491,GO:0016705,GO:0016709,GO:0016712,GO:0019866,GO:0031090,GO:0031966,GO:0031967,GO:0031975,GO:0042180,GO:0042181,GO:0043226,GO:0043227,GO:0043229,GO:0043231,GO:…	ko:K06126	ko00130,ko01100,ko01110,map00130,map01100,map01110	FAD_binding_3	OTHER	1	1.9e-05	NA	NA	NA	NA	NA	NA
342092	NA	By MS/MS	NA	NA	NA	NA	0	6707200	0	0	0	0	0	0	0	0	0	0	82508.K1VD50	4.44e-107	320	COG0563@1|root,KOG3078@2759|Eukaryota,38DAF@33154|Opisthokonta,3NVM0@4751|Fungi,3V0TT@5204|Basidiomycota,3VF63@5234|Tremellales	4751|Fungi	F	Adenylate kinase, active site lid	ADK2	GO:0003674,GO:0003824,GO:0005575,GO:0005622,GO:0005623,GO:0005737,GO:0005739,GO:0005740,GO:0005743,GO:0005759,GO:0006139,GO:0006725,GO:0006753,GO:0006793,GO:0006796,GO:0006807,GO:0008150,GO:0008152,GO:0009117,GO:0009987,GO:0016020,GO:0016301,GO:0016310,GO:0016740,GO:0016772,GO:0016776,GO:0019205,GO:0019637,GO:0019866,GO:0031090,GO:0031966,GO:0031967,GO:0031974,GO:0031975,GO:0034641,GO:0043226,GO:…	ko:K00939,ko:K00944	ko00230,ko00730,ko01100,ko01110,ko01130,map00230,map00730,map01100,map01110,map01130	ADK,ADK_lid	OTHER	1	6e-06	NA	NA	NA	NA	NA	NA
342128	By MS/MS	By MS/MS	By MS/MS	By MS/MS	By MS/MS	By MS/MS	21167000	48061000	17155000	40737000	72525000	21861000	4680800	8508700	4693700	8442500	5413900	4046800	82508.K1VMQ0	0	1441	COG1877@1|root,KOG1050@2759|Eukaryota,38CEK@33154|Opisthokonta,3NU3V@4751|Fungi,3UZ1J@5204|Basidiomycota,3VE54@5234|Tremellales	4751|Fungi	G	Trehalose-phosphatase	NA	NA	ko:K16055	ko00500,ko01100,map00500,map01100	Glyco_transf_20,Trehalose_PPase	OTHER	1	0	NA	GT	GT20	NA	GT20:20.1	GT20*10
342262	By MS/MS	By MS/MS	By MS/MS	By MS/MS	By MS/MS	By MS/MS	51097000	95889000	39803000	106110000	314780000	212630000	18869000	20039000	14017000	18578000	20369000	19457000	82508.K1VUM6	3.11e-148	442	KOG2190@1|root,KOG2190@2759|Eukaryota,38G1X@33154|Opisthokonta,3NYWM@4751|Fungi,3UXXY@5204|Basidiomycota,3VDVF@5234|Tremellales	4751|Fungi	A	KH domain	PBP2	GO:0000723,GO:0003674,GO:0003676,GO:0003723,GO:0003729,GO:0005488,GO:0005575,GO:0005622,GO:0005623,GO:0005634,GO:0005737,GO:0006139,GO:0006259,GO:0006725,GO:0006807,GO:0006996,GO:0008150,GO:0008152,GO:0009987,GO:0016043,GO:0032200,GO:0034641,GO:0042592,GO:0043170,GO:0043226,GO:0043227,GO:0043229,GO:0043231,GO:0044237,GO:0044238,GO:0044260,GO:0044424,GO:0044464,GO:0046483,GO:0051276,GO:0060249,GO:…	ko:K18738	NA	KH_1	OTHER	1	0	NA	NA	NA	NA	NA	NA
342297	By MS/MS	By MS/MS	By MS/MS	By MS/MS	By MS/MS	By MS/MS	23850000	75428000	19257000	54770000	70279000	26457000	6180000	12124000	7348300	7798300	5165900	4603700	82508.K1VVJ5	0	1386	COG5110@1|root,KOG2005@2759|Eukaryota,38ER5@33154|Opisthokonta,3NU6Z@4751|Fungi,3UYEH@5204|Basidiomycota,3VEKG@5234|Tremellales	4751|Fungi	O	26S proteasome regulatory complex, non-ATPase subcomplex, Rpn1 subunit	RPN1	GO:0000502,GO:0003674,GO:0005488,GO:0005515,GO:0005575,GO:0005622,GO:0005623,GO:0005634,GO:0005737,GO:0005783,GO:0005829,GO:0005838,GO:0006508,GO:0006511,GO:0006807,GO:0007088,GO:0007346,GO:0008150,GO:0008152,GO:0008540,GO:0009056,GO:0009057,GO:0009896,GO:0009987,GO:0010498,GO:0010564,GO:0010638,GO:0010965,GO:0012505,GO:0019538,GO:0019941,GO:0022624,GO:0030071,GO:0030163,GO:0030674,GO:0031331,GO:…	ko:K03028	ko03050,ko05169,map03050,map05169	PC_rep	OTHER	1	2e-06	NA	NA	NA	NA	NA	NA
342306	By matching	By MS/MS	By matching	By matching	By matching	By matching	5581800	33549000	5076800	19655000	38077000	12743000	0	0	0	0	0	0	552467.XP_003194292.1	5.93e-174	504	COG0042@1|root,KOG2334@2759|Eukaryota,39RD0@33154|Opisthokonta,3NU4X@4751|Fungi,3UYPB@5204|Basidiomycota,3VDUK@5234|Tremellales	4751|Fungi	J	Dihydrouridine synthase (Dus)	dus2	GO:0002943,GO:0003674,GO:0003824,GO:0005575,GO:0005622,GO:0005623,GO:0005634,GO:0005737,GO:0006139,GO:0006396,GO:0006399,GO:0006400,GO:0006725,GO:0006807,GO:0008033,GO:0008150,GO:0008152,GO:0009451,GO:0009987,GO:0010467,GO:0016070,GO:0016491,GO:0016627,GO:0017150,GO:0034470,GO:0034641,GO:0034660,GO:0043170,GO:0043226,GO:0043227,GO:0043229,GO:0043231,GO:0043412,GO:0044237,GO:0044238,GO:0044424,GO:…	ko:K05543	NA	Dus	OTHER	1	0	NA	NA	NA	NA	NA	NA
342470	By MS/MS	By MS/MS	By MS/MS	By MS/MS	By MS/MS	By MS/MS	123540000	96805000	129850000	331550000	1818900000	2033900000	29778000	9758800	29930000	29394000	67130000	128990000	5207.AAW46508	1.78e-257	743	COG2730@1|root,2QRG8@2759|Eukaryota,38M6K@33154|Opisthokonta,3NUQG@4751|Fungi,3UZG0@5204|Basidiomycota,3VDW6@5234|Tremellales	4751|Fungi	G	Cellulase (glycosyl hydrolase family 5)	exgD	GO:0000003,GO:0000272,GO:0000746,GO:0000747,GO:0000935,GO:0003674,GO:0003824,GO:0004338,GO:0004553,GO:0005575,GO:0005576,GO:0005622,GO:0005623,GO:0005856,GO:0005886,GO:0005937,GO:0005975,GO:0005976,GO:0006073,GO:0008150,GO:0008152,GO:0008422,GO:0009056,GO:0009057,GO:0009251,GO:0009986,GO:0009987,GO:0015629,GO:0015926,GO:0016020,GO:0016021,GO:0016043,GO:0016052,GO:0016787,GO:0016798,GO:0019953,GO:…	ko:K01210	ko00500,map00500	Cellulase	OTHER	1	0	NA	GH	GH5	GH5_9	GH5:44.2	GH5*2
342568	By matching	By MS/MS	NA	By MS/MS	By MS/MS	By MS/MS	3086100	30417000	0	10172000	51853000	46176000	0	5939300	0	5372600	4414800	6331800	82508.K1VXI8	4.52e-302	834	COG2303@1|root,KOG1238@2759|Eukaryota,38UEK@33154|Opisthokonta,3NUFD@4751|Fungi,3UYTX@5204|Basidiomycota,3VE50@5234|Tremellales	4751|Fungi	E	Belongs to the GMC oxidoreductase family	NA	NA	NA	NA	GMC_oxred_C,GMC_oxred_N	OTHER	1	8e-06	NA	AA	AA3	AA3_2	AA3:10.1	NA
342679	By MS/MS	By MS/MS	By MS/MS	By MS/MS	By MS/MS	By MS/MS	51035000	127800000	48017000	130380000	309030000	247400000	13125000	18343000	11720000	20722000	16367000	14659000	5217.XP_007001856.1	0	921	COG1156@1|root,KOG1351@2759|Eukaryota,38F6K@33154|Opisthokonta,3NWY5@4751|Fungi,3UYY1@5204|Basidiomycota,3VD7S@5234|Tremellales	4751|Fungi	C	ATP synthase alpha/beta family, nucleotide-binding domain	VMA2	GO:0000221,GO:0000322,GO:0000323,GO:0000324,GO:0000329,GO:0003674,GO:0003824,GO:0005215,GO:0005575,GO:0005622,GO:0005623,GO:0005737,GO:0005773,GO:0005774,GO:0005886,GO:0006810,GO:0006811,GO:0006812,GO:0006873,GO:0006874,GO:0006875,GO:0006885,GO:0006914,GO:0007035,GO:0008150,GO:0008152,GO:0008324,GO:0009056,GO:0009405,GO:0009987,GO:0010494,GO:0015075,GO:0015077,GO:0015078,GO:0015318,GO:0015399,GO:…	ko:K02147	ko00190,ko01100,ko04145,ko04150,ko04721,ko04966,ko05110,ko05120,ko05323,map00190,map01100,map04145,map04150,map04721,map04966,map05110,map05120,map05323	ATP-synt_ab,ATP-synt_ab_N	OTHER	1	0	NA	NA	NA	NA	NA	NA
342718	By MS/MS	By MS/MS	By MS/MS	By MS/MS	By MS/MS	By MS/MS	176260000	368730000	189260000	775320000	2887100000	1988700000	166380000	194740000	167840000	194720000	229590000	217320000	552467.XP_003192236.1	8.09e-72	218	COG0200@1|root,KOG1742@2759|Eukaryota,3A1NK@33154|Opisthokonta,3P1S5@4751|Fungi,3V0SB@5204|Basidiomycota,3VFBZ@5234|Tremellales	4751|Fungi	J	Belongs to the universal ribosomal protein uL15 family	RPL28	GO:0002181,GO:0003674,GO:0003676,GO:0003723,GO:0003735,GO:0005198,GO:0005488,GO:0005575,GO:0005622,GO:0005623,GO:0005634,GO:0005737,GO:0005829,GO:0005840,GO:0006412,GO:0006518,GO:0006807,GO:0008150,GO:0008152,GO:0009058,GO:0009059,GO:0009987,GO:0010467,GO:0015934,GO:0019538,GO:0022625,GO:0022626,GO:0030684,GO:0030687,GO:0032991,GO:0034641,GO:0034645,GO:0043043,GO:0043170,GO:0043226,GO:0043227,GO:…	ko:K02900,ko:K11273	ko03010,map03010	Ribosomal_L27A	OTHER	1	1e-06	NA	NA	NA	NA	NA	NA
342806	By matching	By MS/MS	NA	By MS/MS	By MS/MS	By MS/MS	3944600	9979700	0	8844100	24703000	11965000	0	4066800	0	0	2726800	2335600	552467.XP_003192197.1	2.99e-276	804	COG0696@1|root,KOG1914@2759|Eukaryota,38B6X@33154|Opisthokonta,3NV0B@4751|Fungi,3UZYX@5204|Basidiomycota,3VD1E@5234|Tremellales	4751|Fungi	A	Suppressor of forked protein (Suf)	RNA14	GO:0003674,GO:0003676,GO:0003723,GO:0003729,GO:0005488,GO:0005515,GO:0005575,GO:0005622,GO:0005623,GO:0005634,GO:0005654,GO:0005737,GO:0005739,GO:0005829,GO:0005847,GO:0005849,GO:0006139,GO:0006378,GO:0006379,GO:0006396,GO:0006397,GO:0006725,GO:0006807,GO:0008150,GO:0008152,GO:0009607,GO:0009719,GO:0009987,GO:0010467,GO:0010468,GO:0016070,GO:0016071,GO:0019219,GO:0019222,GO:0031123,GO:0031124,GO:…	ko:K14408	ko03015,map03015	Suf	OTHER	1	2e-06	NA	NA	NA	NA	NA	NA
342823	By MS/MS	By MS/MS	By MS/MS	By MS/MS	By MS/MS	By MS/MS	21563000	43668000	16180000	36105000	83285000	37012000	10773000	11128000	9400800	11937000	6977800	6823800	82508.K1WFA8	1.39e-162	462	KOG1586@1|root,KOG1586@2759|Eukaryota,38GSG@33154|Opisthokonta,3NWP2@4751|Fungi,3UZB3@5204|Basidiomycota,3VDGZ@5234|Tremellales	4751|Fungi	U	Soluble NSF attachment protein, SNAP	SEC17	GO:0000149,GO:0000322,GO:0000323,GO:0000324,GO:0000329,GO:0001671,GO:0003674,GO:0005483,GO:0005488,GO:0005515,GO:0005575,GO:0005622,GO:0005623,GO:0005737,GO:0005773,GO:0005774,GO:0005829,GO:0006810,GO:0006886,GO:0006888,GO:0006906,GO:0006914,GO:0006996,GO:0007033,GO:0008047,GO:0008104,GO:0008150,GO:0008152,GO:0009056,GO:0009987,GO:0015031,GO:0015833,GO:0016020,GO:0016043,GO:0016050,GO:0016192,GO:…	ko:K15296	ko04138,ko04721,map04138,map04721	SNAP	OTHER	1	0	NA	NA	NA	NA	NA	NA
342883	By matching	By matching	By matching	By MS/MS	By MS/MS	By matching	1309000	14022000	7120600	3692200	30800000	3404000	0	0	0	0	0	0	5217.XP_007004438.1	5.73e-100	296	COG2518@1|root,KOG1661@2759|Eukaryota,38DY1@33154|Opisthokonta,3P13J@4751|Fungi,3V06K@5204|Basidiomycota,3VFH7@5234|Tremellales	4751|Fungi	O	Protein-L-isoaspartate(D-aspartate) O-methyltransferase (PCMT)	NA	GO:0003674,GO:0003824,GO:0004719,GO:0006464,GO:0006479,GO:0006807,GO:0008150,GO:0008152,GO:0008168,GO:0008171,GO:0008213,GO:0008276,GO:0008757,GO:0009987,GO:0010340,GO:0016740,GO:0016741,GO:0019538,GO:0030091,GO:0032259,GO:0036211,GO:0043170,GO:0043412,GO:0043414,GO:0044237,GO:0044238,GO:0044260,GO:0044267,GO:0051998,GO:0071704,GO:0140096,GO:1901564	ko:K00573	NA	PCMT	OTHER	1	1e-06	NA	NA	NA	NA	NA	NA
342960	By MS/MS	By MS/MS	By MS/MS	By MS/MS	By MS/MS	By MS/MS	38133000	116960000	45985000	106470000	207720000	145820000	15181000	21908000	19252000	15025000	12146000	11839000	82508.K1VKR3	0	898	COG0018@1|root,KOG1195@2759|Eukaryota,38DX4@33154|Opisthokonta,3NVK0@4751|Fungi,3UYHM@5204|Basidiomycota,3VESY@5234|Tremellales	4751|Fungi	J	DALR anticodon binding domain	SYR1	GO:0000959,GO:0002181,GO:0003674,GO:0003824,GO:0004812,GO:0004814,GO:0005575,GO:0005622,GO:0005623,GO:0005737,GO:0005739,GO:0006082,GO:0006139,GO:0006399,GO:0006412,GO:0006418,GO:0006420,GO:0006518,GO:0006520,GO:0006725,GO:0006807,GO:0008150,GO:0008152,GO:0009058,GO:0009059,GO:0009987,GO:0010467,GO:0016070,GO:0016874,GO:0016875,GO:0019538,GO:0019752,GO:0032543,GO:0034641,GO:0034645,GO:0034660,GO:…	ko:K01887	ko00970,map00970	Arg_tRNA_synt_N,DALR_1,tRNA-synt_1d	OTHER	1	0	NA	NA	NA	NA	NA	NA
343001	By MS/MS	By MS/MS	By MS/MS	By MS/MS	By MS/MS	By MS/MS	442970000	1816500000	498920000	1560600000	2192800000	1241500000	98496000	183680000	111940000	129490000	89351000	69588000	5207.AAW42257	1.95e-278	788	COG4770@1|root,KOG0238@2759|Eukaryota,38B7N@33154|Opisthokonta,3NVGW@4751|Fungi,3UYEJ@5204|Basidiomycota,3VCNH@5234|Tremellales	4751|Fungi	EI	Methylcrotonoyl-Coenzyme A carboxylase 1	NA	NA	ko:K01968	ko00280,ko01100,map00280,map01100	Biotin_carb_C,Biotin_carb_N,Biotin_lipoyl,CPSase_L_D2	OTHER	1	0	NA	NA	NA	NA	NA	NA
343063	By MS/MS	By MS/MS	By MS/MS	By MS/MS	By MS/MS	By MS/MS	292670000	636670000	304960000	607820000	1870600000	1009200000	110930000	123540000	114130000	99225000	166700000	119800000	82508.K1VML0	7.73e-147	414	COG0197@1|root,KOG0857@2759|Eukaryota,38CBG@33154|Opisthokonta,3NXSP@4751|Fungi,3UY4B@5204|Basidiomycota,3VDKC@5234|Tremellales	4751|Fungi	J	Ribosomal protein L16p/L10e	RPL10	GO:0000027,GO:0002181,GO:0003674,GO:0003676,GO:0003723,GO:0003735,GO:0005198,GO:0005488,GO:0005575,GO:0005622,GO:0005623,GO:0005737,GO:0005829,GO:0005840,GO:0006412,GO:0006415,GO:0006518,GO:0006807,GO:0006996,GO:0008150,GO:0008152,GO:0009058,GO:0009059,GO:0009987,GO:0010467,GO:0015934,GO:0016043,GO:0019538,GO:0022411,GO:0022607,GO:0022613,GO:0022618,GO:0022625,GO:0022626,GO:0032984,GO:0032991,GO:…	ko:K02866	ko03010,map03010	Ribosomal_L16	OTHER	1	0	NA	NA	NA	NA	NA	NA
343129	By MS/MS	By MS/MS	By matching	By MS/MS	By MS/MS	By MS/MS	11056000	11742000	2188800	26158000	30286000	44169000	0	3972700	0	6911500	3920800	8006200	5207.AAW46826	2.5e-84	261	2AXRU@1|root,2S01H@2759|Eukaryota,38GHY@33154|Opisthokonta,3NTWW@4751|Fungi,3V0VB@5204|Basidiomycota,3VFE2@5234|Tremellales	4751|Fungi	S	Mitochondrial protein	NA	NA	NA	NA	-	OTHER	1	0	NA	NA	NA	NA	NA	NA
343228	NA	NA	NA	NA	By MS/MS	By MS/MS	0	0	0	0	6609900	4103100	0	0	0	0	0	0	5207.AAW46989	5.11e-163	472	2CMZY@1|root,2QT0V@2759|Eukaryota,39KP7@33154|Opisthokonta,3Q52D@4751|Fungi,3V0PI@5204|Basidiomycota,3VE1U@5234|Tremellales	4751|Fungi	S	Sucrase/ferredoxin-like	NA	NA	NA	NA	Suc_Fer-like	OTHER	1	5.8e-05	NA	NA	NA	NA	NA	NA
343243	By MS/MS	NA	NA	By matching	By MS/MS	NA	0	0	0	13733000	22889000	0	0	0	0	0	0	0	5207.AAW44304	0	948	KOG0583@1|root,KOG0583@2759|Eukaryota,3AGEH@33154|Opisthokonta,3NUN4@4751|Fungi,3UZ7J@5204|Basidiomycota,3VDN2@5234|Tremellales	4751|Fungi	T	Adenylate sensor of SNF1-like protein kinase	SNF1	GO:0000003,GO:0000075,GO:0000077,GO:0000082,GO:0000086,GO:0000166,GO:0000226,GO:0000278,GO:0000302,GO:0000307,GO:0000322,GO:0000323,GO:0000324,GO:0001302,GO:0001403,GO:0003674,GO:0003824,GO:0004672,GO:0004674,GO:0004679,GO:0004693,GO:0005085,GO:0005086,GO:0005488,GO:0005515,GO:0005524,GO:0005575,GO:0005622,GO:0005623,GO:0005634,GO:0005635,GO:0005641,GO:0005654,GO:0005737,GO:0005739,GO:0005768,GO:…	ko:K12761	ko04113,ko04138,map04113,map04138	AdenylateSensor,Pkinase,UBA_2	OTHER	1	0	NA	NA	NA	NA	NA	NA
343268	By MS/MS	NA	By matching	NA	NA	NA	5377800	0	3667800	0	0	0	0	0	0	0	0	0	31870.EFQ30776	1.05e-253	737	2EDY3@1|root,2SJFZ@2759|Eukaryota,39TCF@33154|Opisthokonta,3NXW5@4751|Fungi,3QRM9@4890|Ascomycota,216F9@147550|Sordariomycetes,1EZTZ@1028384|Glomerellales	4751|Fungi	S	sulfatase	NA	NA	NA	NA	Sulfatase	OTHER	1	4e-06	NA	NA	NA	NA	NA	NA
343276	By MS/MS	By MS/MS	By MS/MS	By MS/MS	By MS/MS	By MS/MS	37031000	72623000	31636000	134410000	264510000	173770000	10707000	14477000	8501500	18703000	12194000	12419000	5217.XP_007001093.1	2.76e-89	274	28MZB@1|root,2QUI6@2759|Eukaryota,38HPW@33154|Opisthokonta,3NZ44@4751|Fungi,3V0FB@5204|Basidiomycota,3VDPE@5234|Tremellales	4751|Fungi	S	von Willebrand factor (vWF) type A domain	NA	NA	NA	NA	vWA-TerF-like	OTHER	1	2.2e-05	NA	NA	NA	NA	NA	NA
343348	NA	By MS/MS	NA	By matching	By MS/MS	By MS/MS	0	3044800	0	4147400	15327000	2142700	0	0	0	0	0	0	82508.K1V0V2	1.82000000000343e-313	897	COG1355@1|root,KOG2140@1|root,KOG2654@1|root,KOG2140@2759|Eukaryota,KOG2654@2759|Eukaryota,KOG3086@2759|Eukaryota,38ENJ@33154|Opisthokonta,3NU93@4751|Fungi,3UXTB@5204|Basidiomycota,3VCSY@5234|Tremellales	4751|Fungi	S	Domain in DAP-5, eIF4G, MA-3 and other proteins.	CWC22	GO:0000375,GO:0000377,GO:0000398,GO:0003674,GO:0003676,GO:0003723,GO:0005488,GO:0005575,GO:0005622,GO:0005623,GO:0005634,GO:0005681,GO:0005684,GO:0006139,GO:0006396,GO:0006397,GO:0006725,GO:0006807,GO:0008150,GO:0008152,GO:0008380,GO:0009987,GO:0010467,GO:0016070,GO:0016071,GO:0032991,GO:0034641,GO:0043170,GO:0043226,GO:0043227,GO:0043229,GO:0043231,GO:0044237,GO:0044238,GO:0044422,GO:0044424,GO:…	ko:K13100	NA	MA3,MIF4G	OTHER	1	0	NA	NA	NA	NA	NA	NA
343350	By MS/MS	By MS/MS	By MS/MS	By MS/MS	By MS/MS	By MS/MS	20056000000	12237000000	13998000000	8107100000	55905000000	50331000000	5056800000	2374000000	6992100000	1223800000	5360200000	7979000000	293227.XP_008718808.1	2.04e-64	210	29KDB@1|root,2RTN8@2759|Eukaryota,39RVG@33154|Opisthokonta,3NVTQ@4751|Fungi,3QMK9@4890|Ascomycota,20D4I@147545|Eurotiomycetes,3MVIK@451870|Chaetothyriomycetidae	4751|Fungi	S	Putative peptidase family	PRA1	GO:0001411,GO:0002673,GO:0002682,GO:0002683,GO:0002697,GO:0002698,GO:0002920,GO:0002921,GO:0003674,GO:0005102,GO:0005178,GO:0005488,GO:0005515,GO:0005575,GO:0005576,GO:0005618,GO:0005623,GO:0006873,GO:0006875,GO:0006882,GO:0007155,GO:0007159,GO:0008150,GO:0008270,GO:0009277,GO:0009605,GO:0009607,GO:0009892,GO:0009986,GO:0009987,GO:0010468,GO:0010605,GO:0010629,GO:0010955,GO:0019222,GO:0019725,GO:…	NA	NA	HRXXH	SP	0.000403	0.999566	CS pos: 14-15. Pr: 0.9294	NA	NA	NA	NA	NA
343418	By MS/MS	By MS/MS	By MS/MS	By MS/MS	By MS/MS	By MS/MS	547190000	435690000	468460000	2997000000	9655900000	3213600000	296940000	118550000	234920000	633770000	1080700000	570480000	82508.K1VCF0	2.31e-68	208	COG2097@1|root,KOG0893@2759|Eukaryota,3A3JD@33154|Opisthokonta,3P4B8@4751|Fungi,3V180@5204|Basidiomycota,3VF8B@5234|Tremellales	4751|Fungi	J	Ribosomal_L31e	RPL31B	GO:0002181,GO:0003674,GO:0003735,GO:0005198,GO:0005575,GO:0005622,GO:0005623,GO:0005737,GO:0005829,GO:0005840,GO:0006412,GO:0006450,GO:0006518,GO:0006807,GO:0008150,GO:0008152,GO:0009058,GO:0009059,GO:0009987,GO:0010467,GO:0015934,GO:0019538,GO:0022625,GO:0022626,GO:0032991,GO:0034641,GO:0034645,GO:0043043,GO:0043170,GO:0043226,GO:0043228,GO:0043229,GO:0043232,GO:0043603,GO:0043604,GO:0044237,GO:…	ko:K02910	ko03010,map03010	Ribosomal_L31e	OTHER	1	0	NA	NA	NA	NA	NA	NA
343442	NA	By MS/MS	NA	NA	By MS/MS	NA	0	7732800	0	0	6625600	0	0	0	0	0	0	0	82508.K1V0D6	2.83e-269	790	KOG2513@1|root,KOG2513@2759|Eukaryota,38FVF@33154|Opisthokonta,3NW0E@4751|Fungi,3UXWQ@5204|Basidiomycota,3VCZV@5234|Tremellales	4751|Fungi	D	Calcium-activated chloride channel	NA	GO:0003674,GO:0005488,GO:0005575,GO:0005622,GO:0005623,GO:0005737,GO:0005783,GO:0005886,GO:0005933,GO:0005938,GO:0006996,GO:0007029,GO:0008104,GO:0008150,GO:0008289,GO:0009987,GO:0010256,GO:0012505,GO:0016020,GO:0016021,GO:0016043,GO:0019216,GO:0019220,GO:0019222,GO:0022406,GO:0031224,GO:0031323,GO:0031984,GO:0032541,GO:0033036,GO:0033101,GO:0034613,GO:0035303,GO:0043226,GO:0043227,GO:0043229,GO:…	ko:K19327	NA	Anoctamin	OTHER	1	0	NA	NA	NA	NA	NA	NA
343559	By MS/MS	By MS/MS	By MS/MS	By MS/MS	By MS/MS	By MS/MS	169450000	393800000	172670000	824050000	1966500000	1062900000	105480000	114550000	122320000	224520000	308170000	183670000	82508.K1VN77	6.47e-67	204	COG2174@1|root,KOG1790@2759|Eukaryota,3A4A9@33154|Opisthokonta,3P2ZU@4751|Fungi,3V186@5204|Basidiomycota,3VFI4@5234|Tremellales	4751|Fungi	J	Ribosomal protein L34e	NA	GO:0002181,GO:0003674,GO:0003676,GO:0003723,GO:0003735,GO:0005198,GO:0005488,GO:0005575,GO:0005622,GO:0005623,GO:0005737,GO:0005829,GO:0005840,GO:0006412,GO:0006518,GO:0006807,GO:0008150,GO:0008152,GO:0009058,GO:0009059,GO:0009987,GO:0010467,GO:0015934,GO:0019538,GO:0022613,GO:0022625,GO:0022626,GO:0030684,GO:0030687,GO:0032991,GO:0034641,GO:0034645,GO:0042254,GO:0043043,GO:0043170,GO:0043226,GO:…	ko:K02915	ko03010,map03010	Ribosomal_L34e	OTHER	1	0	NA	NA	NA	NA	NA	NA
343624	By matching	By MS/MS	NA	By MS/MS	By MS/MS	By MS/MS	1766300	5209900	0	11315000	12831000	14194000	0	0	0	0	2101700	3586600	82508.K1VSB4	1.12e-103	313	COG1859@1|root,KOG2278@2759|Eukaryota,39YM3@33154|Opisthokonta,3P117@4751|Fungi,3V166@5204|Basidiomycota,3VEWX@5234|Tremellales	4751|Fungi	H	RNA 2'-phosphotransferase, Tpt1 / KptA family	TPT1	GO:0000215,GO:0000394,GO:0003674,GO:0003824,GO:0005575,GO:0005622,GO:0005623,GO:0005634,GO:0005737,GO:0006139,GO:0006388,GO:0006396,GO:0006399,GO:0006725,GO:0006807,GO:0008033,GO:0008150,GO:0008152,GO:0008380,GO:0009987,GO:0010467,GO:0016070,GO:0016740,GO:0016772,GO:0016773,GO:0019538,GO:0034470,GO:0034641,GO:0034660,GO:0043170,GO:0043226,GO:0043227,GO:0043229,GO:0043231,GO:0044237,GO:0044238,GO:…	ko:K10669	NA	PTS_2-RNA	OTHER	1	0	NA	NA	NA	NA	NA	NA
343821	By MS/MS	By MS/MS	By MS/MS	By MS/MS	By MS/MS	By MS/MS	6991500	17514000	8567100	40229000	142820000	53317000	0	9981800	8409100	7422700	10287000	0	5217.XP_007001270.1	8.44e-54	176	COG3277@1|root,KOG3262@2759|Eukaryota,38HDD@33154|Opisthokonta,3P248@4751|Fungi,3V0AW@5204|Basidiomycota,3VFI8@5234|Tremellales	4751|Fungi	J	Required for ribosome biogenesis. Part of a complex which catalyzes pseudouridylation of rRNA. This involves the isomerization of uridine such that the ribose is subsequently attached to C5, instead of the normal N1	GAR1	GO:0000154,GO:0000454,GO:0001522,GO:0003674,GO:0003676,GO:0003723,GO:0005488,GO:0005575,GO:0005622,GO:0005623,GO:0005634,GO:0005730,GO:0005732,GO:0006139,GO:0006364,GO:0006396,GO:0006725,GO:0006807,GO:0008150,GO:0008152,GO:0009451,GO:0009987,GO:0010467,GO:0016070,GO:0016072,GO:0016073,GO:0016074,GO:0022613,GO:0030515,GO:0031118,GO:0031120,GO:0031429,GO:0031974,GO:0031981,GO:0032991,GO:0034470,GO:…	ko:K11128	ko03008,map03008	Gar1	OTHER	1	0	NA	NA	NA	NA	NA	NA
343873	By MS/MS	By MS/MS	By MS/MS	By MS/MS	By MS/MS	By MS/MS	2290200000	1117700000	1739500000	995580000	2746300000	3726200000	986300000	285110000	788520000	231640000	280950000	569990000	5217.XP_007002513.1	1.04e-75	236	2C25F@1|root,2QQTG@2759|Eukaryota,38HG2@33154|Opisthokonta,3NXIB@4751|Fungi,3V138@5204|Basidiomycota,3VFEI@5234|Tremellales	4751|Fungi	S	Required for normal levels of the cell wall 1,6-beta- glucan. Involved in a protein folding machinery chaperoning proteins acting in various physiological processes including cell wall synthesis and lysis of autophagic bodies	ROT1	GO:0000003,GO:0003674,GO:0005488,GO:0005515,GO:0005575,GO:0005622,GO:0005623,GO:0005737,GO:0005783,GO:0005789,GO:0006457,GO:0006458,GO:0006464,GO:0006486,GO:0006487,GO:0006493,GO:0006807,GO:0006996,GO:0007010,GO:0007114,GO:0007117,GO:0007118,GO:0007163,GO:0008150,GO:0008152,GO:0009058,GO:0009059,GO:0009100,GO:0009101,GO:0009272,GO:0009987,GO:0012505,GO:0016020,GO:0016043,GO:0019538,GO:0019954,GO:…	NA	NA	Rot1	SP	0.00027	0.999684	CS pos: 20-21. Pr: 0.5726	NA	NA	NA	NA	NA
343989	By MS/MS	By MS/MS	By MS/MS	By matching	By MS/MS	By MS/MS	6428600	14004000	5674600	9151800	6629200	5378400	0	0	0	0	0	0	140110.NechaP77590	3.74e-18	84	2D4AX@1|root,2SUI3@2759|Eukaryota,3ANAS@33154|Opisthokonta,3PE3Q@4751|Fungi,3QZKJ@4890|Ascomycota,21F0A@147550|Sordariomycetes,3TMX5@5125|Hypocreales,1FUGS@110618|Nectriaceae	4751|Fungi	S	Cupin domain	NA	NA	NA	NA	Cupin_2	OTHER	1	5.1e-05	NA	NA	NA	NA	NA	NA
344017	NA	NA	NA	NA	By MS/MS	NA	0	0	0	0	0	0	0	0	0	0	0	0	82508.K1VY41	6.06e-266	759	COG5391@1|root,KOG2273@2759|Eukaryota,38CKX@33154|Opisthokonta,3NUQ8@4751|Fungi,3UXTS@5204|Basidiomycota,3VECA@5234|Tremellales	4751|Fungi	U	PhoX homologous domain, present in p47phox and p40phox.	ATG20	GO:0000407,GO:0000422,GO:0003674,GO:0005488,GO:0005543,GO:0005575,GO:0005622,GO:0005623,GO:0005737,GO:0005768,GO:0006810,GO:0006897,GO:0006914,GO:0006996,GO:0007005,GO:0008104,GO:0008150,GO:0008152,GO:0008289,GO:0009056,GO:0009987,GO:0012505,GO:0016020,GO:0016043,GO:0016050,GO:0016192,GO:0016197,GO:0016236,GO:0016482,GO:0019898,GO:0022411,GO:0031410,GO:0031982,GO:0032258,GO:0032266,GO:0033036,GO:…	ko:K21996	NA	PX,Vps5	OTHER	1	1e-06	NA	NA	NA	NA	NA	NA
344356	By MS/MS	By MS/MS	By MS/MS	By MS/MS	By MS/MS	By MS/MS	4405900000	3139200000	4228300000	24043000000	49295000000	75887000000	1144000000	348000000	952520000	2296800000	2430600000	5843500000	82508.K1WND0	0	929	2CMA6@1|root,2QPS4@2759|Eukaryota,38F5I@33154|Opisthokonta,3NWVA@4751|Fungi,3UXZX@5204|Basidiomycota,3VDFY@5234|Tremellales	4751|Fungi	S	Domain of unknown function (DUF1929)	NA	NA	ko:K20929	NA	DUF1929,Glyoxal_oxid_N	SP	0.000496	0.999494	CS pos: 18-19. Pr: 0.9632	AA	AA5	AA5_1	AA5:2.1	AA5*4
344370	By MS/MS	By MS/MS	By MS/MS	By MS/MS	By MS/MS	By MS/MS	93717000	79609000	74563000	0	548770000	366990000	0	68683000	0	0	87931000	99310000	552467.XP_003195544.1	2.04e-157	458	COG3616@1|root,2QRZ0@2759|Eukaryota,38BQA@33154|Opisthokonta,3NV75@4751|Fungi,3V0HT@5204|Basidiomycota,3VE9N@5234|Tremellales	4751|Fungi	E	Putative serine dehydratase domain	NA	GO:0003674,GO:0003824,GO:0006082,GO:0006520,GO:0006807,GO:0008150,GO:0008152,GO:0008721,GO:0009056,GO:0009063,GO:0009069,GO:0009071,GO:0009987,GO:0016054,GO:0016829,GO:0016840,GO:0016841,GO:0017144,GO:0019478,GO:0019752,GO:0036088,GO:0042737,GO:0043436,GO:0044237,GO:0044238,GO:0044248,GO:0044281,GO:0044282,GO:0046395,GO:0046416,GO:0070178,GO:0071704,GO:1901564,GO:1901565,GO:1901575,GO:1901605,GO:…	ko:K20498	ko00260,map00260	Ala_racemase_N,D-ser_dehydrat	OTHER	1	0	NA	NA	NA	NA	NA	NA
344420	NA	By matching	NA	By MS/MS	By MS/MS	By MS/MS	0	2174500	0	2995400	4468200	2169600	0	0	0	0	0	0	82508.K1VZJ3	9.36e-195	548	COG0202@1|root,KOG1522@2759|Eukaryota,39R3C@33154|Opisthokonta,3NWFI@4751|Fungi,3UZGZ@5204|Basidiomycota,3VCYN@5234|Tremellales	4751|Fungi	K	RNA polymerases D	rpb3	GO:0000228,GO:0000428,GO:0000785,GO:0000790,GO:0005575,GO:0005622,GO:0005623,GO:0005634,GO:0005654,GO:0005665,GO:0005694,GO:0006139,GO:0006351,GO:0006353,GO:0006366,GO:0006369,GO:0006725,GO:0006807,GO:0008150,GO:0008152,GO:0009058,GO:0009059,GO:0009987,GO:0010467,GO:0016070,GO:0016591,GO:0018130,GO:0019438,GO:0030880,GO:0031974,GO:0031981,GO:0032774,GO:0032991,GO:0034641,GO:0034645,GO:0034654,GO:…	ko:K03011	ko00230,ko00240,ko01100,ko03020,ko05016,ko05169,map00230,map00240,map01100,map03020,map05016,map05169	RNA_pol_A_bac,RNA_pol_L	OTHER	1	0	NA	NA	NA	NA	NA	NA
344479	By matching	By matching	By matching	By MS/MS	By MS/MS	By MS/MS	1627100	6286600	1147800	37719000	79748000	21730000	0	4005600	0	6244300	11222000	0	82508.K1VUU6	1.59e-53	172	COG0228@1|root,KOG3419@2759|Eukaryota,3A5Q9@33154|Opisthokonta,3P541@4751|Fungi,3V2F8@5204|Basidiomycota,3VFS6@5234|Tremellales	4751|Fungi	J	Ribosomal protein S16	MRPS16	GO:0000313,GO:0000314,GO:0003674,GO:0003735,GO:0005198,GO:0005575,GO:0005622,GO:0005623,GO:0005737,GO:0005739,GO:0005759,GO:0005761,GO:0005763,GO:0005840,GO:0006412,GO:0006518,GO:0006807,GO:0008150,GO:0008152,GO:0009058,GO:0009059,GO:0009987,GO:0010467,GO:0015935,GO:0019538,GO:0031974,GO:0032543,GO:0032991,GO:0034641,GO:0034645,GO:0043043,GO:0043170,GO:0043226,GO:0043227,GO:0043228,GO:0043229,GO:…	ko:K02959	ko03010,map03010	Ribosomal_S16	OTHER	1	0	NA	NA	NA	NA	NA	NA
344562	By MS/MS	By MS/MS	By MS/MS	By MS/MS	By MS/MS	By MS/MS	60904000	124360000	55550000	155320000	230310000	147350000	10784000	13511000	10577000	15391000	9791200	9769200	82508.K1VK63	0	1317	KOG0307@1|root,KOG0307@2759|Eukaryota,3921I@33154|Opisthokonta,3NW7P@4751|Fungi,3UYAR@5204|Basidiomycota,3VDEY@5234|Tremellales	4751|Fungi	U	WD40 repeats	SEC31	GO:0003674,GO:0005198,GO:0005575,GO:0005622,GO:0005623,GO:0005737,GO:0005798,GO:0005937,GO:0006810,GO:0006886,GO:0006888,GO:0006900,GO:0006996,GO:0006997,GO:0006998,GO:0008104,GO:0008150,GO:0009987,GO:0010256,GO:0012505,GO:0012506,GO:0012507,GO:0015031,GO:0015833,GO:0016020,GO:0016043,GO:0016050,GO:0016192,GO:0030117,GO:0030120,GO:0030127,GO:0030133,GO:0030134,GO:0030135,GO:0030427,GO:0030658,GO:…	ko:K14005	ko04141,map04141	SRA1,Sec16_C,Sec31,WD40	OTHER	1	2.8e-05	NA	NA	NA	NA	NA	NA
344579	By matching	By MS/MS	NA	By MS/MS	By MS/MS	By MS/MS	1473900	14855000	0	23362000	58608000	30100000	0	4183500	0	3228200	3687500	3459300	5207.AAW46005	5.47e-283	783	COG0016@1|root,KOG2784@2759|Eukaryota,38C6T@33154|Opisthokonta,3NTY7@4751|Fungi,3UYVF@5204|Basidiomycota,3VERV@5234|Tremellales	4751|Fungi	J	tRNA synthetases class II core domain (F)	FRS2	GO:0002161,GO:0002181,GO:0003674,GO:0003824,GO:0004812,GO:0004826,GO:0005575,GO:0005622,GO:0005623,GO:0005737,GO:0006082,GO:0006139,GO:0006399,GO:0006412,GO:0006418,GO:0006432,GO:0006450,GO:0006518,GO:0006520,GO:0006725,GO:0006807,GO:0008150,GO:0008152,GO:0009058,GO:0009059,GO:0009328,GO:0009987,GO:0010467,GO:0016070,GO:0016787,GO:0016788,GO:0016874,GO:0016875,GO:0019538,GO:0019752,GO:0032991,GO:…	ko:K01889	ko00970,map00970	tRNA-synt_2d	OTHER	1	0	NA	NA	NA	NA	NA	NA
344590	By MS/MS	By MS/MS	By matching	By MS/MS	By MS/MS	By MS/MS	9101300	16200000	6951700	39388000	65635000	47982000	4173500	4640600	3237600	7167300	5139100	4758100	82508.K1VV37	1.32e-247	684	COG1222@1|root,KOG0651@2759|Eukaryota,38B5M@33154|Opisthokonta,3NVBE@4751|Fungi,3UYGH@5204|Basidiomycota,3VEP6@5234|Tremellales	4751|Fungi	O	AAA domain (Cdc48 subfamily)	RPT4	GO:0000166,GO:0000502,GO:0001672,GO:0003674,GO:0003824,GO:0004175,GO:0005488,GO:0005515,GO:0005524,GO:0005575,GO:0005622,GO:0005623,GO:0005634,GO:0005737,GO:0005829,GO:0005838,GO:0006139,GO:0006259,GO:0006281,GO:0006289,GO:0006355,GO:0006357,GO:0006508,GO:0006511,GO:0006725,GO:0006807,GO:0006950,GO:0006974,GO:0007088,GO:0007346,GO:0008134,GO:0008144,GO:0008150,GO:0008152,GO:0008233,GO:0008540,GO:…	ko:K03064	ko03050,ko05169,map03050,map05169	AAA	OTHER	1	0	NA	NA	NA	NA	NA	NA
344650	NA	By MS/MS	NA	NA	By MS/MS	NA	0	1983000	0	0	19677000	0	0	0	0	0	0	0	82508.K1VC27	1.71e-148	439	COG2940@1|root,KOG2084@2759|Eukaryota,38C3R@33154|Opisthokonta,3P3M1@4751|Fungi,3V2QU@5204|Basidiomycota,3VDP0@5234|Tremellales	4751|Fungi	B	SET (Su(var)3-9, Enhancer-of-zeste, Trithorax) domain	NA	NA	NA	NA	SET	OTHER	1	0	NA	NA	NA	NA	NA	NA
344677	By MS/MS	By MS/MS	By MS/MS	By MS/MS	By MS/MS	By matching	6685500	34398000	9659000	21528000	34638000	24933000	3961100	10322000	3411500	0	3776000	3663000	82508.K1VLR8	0	2066	KOG1835@1|root,KOG1835@2759|Eukaryota,38B8H@33154|Opisthokonta,3NWZB@4751|Fungi,3V078@5204|Basidiomycota,3VCX9@5234|Tremellales	4751|Fungi	S	Nuclear pore complex scaffold, nucleoporins 186/192/205	NUP192	GO:0003674,GO:0005198,GO:0005575,GO:0005622,GO:0005623,GO:0005634,GO:0005635,GO:0005643,GO:0005737,GO:0006810,GO:0006913,GO:0006996,GO:0006997,GO:0006999,GO:0007346,GO:0008150,GO:0009987,GO:0010389,GO:0010564,GO:0012505,GO:0016020,GO:0016021,GO:0016043,GO:0017056,GO:0031224,GO:0031967,GO:0031974,GO:0031975,GO:0031981,GO:0032386,GO:0032879,GO:0032991,GO:0034399,GO:0043226,GO:0043227,GO:0043229,GO:…	ko:K14310	ko03013,map03013	Nup192	OTHER	1	1e-06	NA	NA	NA	NA	NA	NA
344715	NA	By MS/MS	By matching	By MS/MS	By MS/MS	By MS/MS	0	7292700	2870100	12156000	48397000	85674000	0	2794800	0	0	4567200	7998600	552467.XP_003191371.1	2.6e-228	639	COG1804@1|root,KOG3957@2759|Eukaryota,38CWZ@33154|Opisthokonta,3NU4P@4751|Fungi,3UXUJ@5204|Basidiomycota,3VF5A@5234|Tremellales	4751|Fungi	I	CoA-transferase family III	NA	NA	ko:K18703	NA	CoA_transf_3	OTHER	1	0	NA	NA	NA	NA	NA	NA
344806	NA	NA	NA	NA	By MS/MS	NA	0	0	0	0	0	0	0	0	0	0	0	0	82508.K1VUE3	2.22e-21	88.2	2E63A@1|root,2SCUU@2759|Eukaryota,3ADUR@33154|Opisthokonta,3P97K@4751|Fungi,3V2YD@5204|Basidiomycota,3VFY0@5234|Tremellales	4751|Fungi	S	Non-classical export protein 1	NA	NA	NA	NA	NCE101	OTHER	0.992995	0.007004	NA	NA	NA	NA	NA	NA
344824	By MS/MS	By MS/MS	By MS/MS	By MS/MS	By MS/MS	By MS/MS	333070000	765690000	349590000	658540000	1312600000	884230000	28497000	35101000	32464000	24783000	21777000	17677000	5207.AAW44009	0	3625	COG0439@1|root,KOG0368@2759|Eukaryota,38BBT@33154|Opisthokonta,3NUU6@4751|Fungi,3UZEY@5204|Basidiomycota,3VGJQ@5234|Tremellales	4751|Fungi	I	Acetyl-CoA carboxylase, central region	ACC1	GO:0000166,GO:0001676,GO:0003674,GO:0003824,GO:0003989,GO:0004075,GO:0005488,GO:0005524,GO:0005575,GO:0005622,GO:0005623,GO:0005737,GO:0005739,GO:0005783,GO:0005789,GO:0005829,GO:0006082,GO:0006606,GO:0006629,GO:0006631,GO:0006633,GO:0006810,GO:0006886,GO:0006913,GO:0006996,GO:0006997,GO:0006998,GO:0008104,GO:0008144,GO:0008150,GO:0008152,GO:0008610,GO:0009058,GO:0009987,GO:0010256,GO:0012505,GO:…	ko:K11262	ko00061,ko00254,ko00620,ko00640,ko01100,ko01110,ko01212,ko04152,ko04910,ko04922,map00061,map00254,map00620,map00640,map01100,map01110,map01212,map04152,map04910,map04922	ACC_central,Biotin_carb_C,Biotin_carb_N,Biotin_lipoyl,CPSase_L_D2,Carboxyl_trans	OTHER	1	0	NA	NA	NA	NA	NA	NA
344956	By MS/MS	By MS/MS	By MS/MS	By MS/MS	By MS/MS	By MS/MS	26737000	92832000	17941000	57603000	80326000	66978000	9765800	12984000	10486000	9804200	6524100	8143100	5207.AAW41190	1.36e-205	582	COG5231@1|root,KOG2759@2759|Eukaryota,392WU@33154|Opisthokonta,3NY79@4751|Fungi,3UZ34@5204|Basidiomycota,3VCRR@5234|Tremellales	4751|Fungi	C	V-ATPase subunit H	VMA13	GO:0000221,GO:0000322,GO:0000323,GO:0000324,GO:0000329,GO:0003674,GO:0003824,GO:0005215,GO:0005575,GO:0005622,GO:0005623,GO:0005737,GO:0005773,GO:0005774,GO:0006810,GO:0006811,GO:0006812,GO:0006873,GO:0006885,GO:0007035,GO:0008150,GO:0008324,GO:0009987,GO:0015075,GO:0015077,GO:0015078,GO:0015318,GO:0015399,GO:0015405,GO:0015672,GO:0015988,GO:0015991,GO:0016020,GO:0016021,GO:0016462,GO:0016469,GO:…	ko:K02144	ko00190,ko01100,ko04142,ko04145,ko04150,ko04721,ko05110,ko05120,ko05152,ko05323,map00190,map01100,map04142,map04145,map04150,map04721,map05110,map05120,map05152,map05323	V-ATPase_H_C,V-ATPase_H_N	OTHER	1	0	NA	NA	NA	NA	NA	NA
344998	By MS/MS	By MS/MS	By matching	By MS/MS	By MS/MS	By MS/MS	14136000	37662000	15545000	58799000	59009000	35530000	7293500	8047400	7657000	7590900	5712700	3466000	552467.XP_003191482.1	0	1300	COG5038@1|root,KOG1012@2759|Eukaryota,38BJ6@33154|Opisthokonta,3NZ4W@4751|Fungi,3UYT0@5204|Basidiomycota,3VDY6@5234|Tremellales	4751|Fungi	U	Protein kinase C conserved region 2 (CalB)	NA	GO:0003674,GO:0005488,GO:0005543,GO:0005575,GO:0005622,GO:0005623,GO:0005737,GO:0005783,GO:0005886,GO:0005938,GO:0008150,GO:0008289,GO:0009987,GO:0012505,GO:0016020,GO:0022406,GO:0031984,GO:0032541,GO:0043167,GO:0043168,GO:0043226,GO:0043227,GO:0043229,GO:0043231,GO:0044422,GO:0044424,GO:0044432,GO:0044444,GO:0044446,GO:0044448,GO:0044464,GO:0051179,GO:0051640,GO:0051641,GO:0051643,GO:0061817,GO:…	NA	NA	C2	OTHER	1	1e-06	NA	NA	NA	NA	NA	NA
345082	By MS/MS	By MS/MS	NA	By matching	By MS/MS	By matching	0	6942100	0	4248600	10046000	10172000	0	0	0	0	0	0	5207.AAW41149	2.32e-187	531	COG0031@1|root,KOG1252@2759|Eukaryota,38B7H@33154|Opisthokonta,3NV6E@4751|Fungi,3UYYB@5204|Basidiomycota,3VDS7@5234|Tremellales	4751|Fungi	E	Pyridoxal-phosphate dependent enzyme	CYS4	GO:0000096,GO:0000097,GO:0003674,GO:0003676,GO:0003723,GO:0003729,GO:0003824,GO:0004122,GO:0005488,GO:0005575,GO:0005622,GO:0005623,GO:0005737,GO:0005739,GO:0006082,GO:0006520,GO:0006534,GO:0006535,GO:0006563,GO:0006790,GO:0006807,GO:0007089,GO:0007346,GO:0008144,GO:0008150,GO:0008152,GO:0008652,GO:0009058,GO:0009069,GO:0009070,GO:0009092,GO:0009403,GO:0009404,GO:0009987,GO:0010494,GO:0010564,GO:…	ko:K01697	ko00260,ko00270,ko01100,ko01130,ko01230,map00260,map00270,map01100,map01130,map01230	CBS,PALP	OTHER	1	0	NA	NA	NA	NA	NA	NA
345110	By MS/MS	By MS/MS	By MS/MS	By MS/MS	By MS/MS	By MS/MS	3541100	17287000	5827000	18609000	38312000	40848000	0	3983400	4142100	3716500	2669800	2969300	82508.K1VJT3	5.82e-185	529	COG0436@1|root,KOG0257@2759|Eukaryota,38G9N@33154|Opisthokonta,3NXVG@4751|Fungi,3V082@5204|Basidiomycota,3VCNJ@5234|Tremellales	4751|Fungi	E	Aminotransferase class I and II	NA	NA	NA	NA	Aminotran_1_2	OTHER	0.999712	0.000339	NA	NA	NA	NA	NA	NA
345222	By matching	By MS/MS	By matching	By MS/MS	By MS/MS	By MS/MS	2614400	37587000	5596700	24193000	38635000	37076000	0	13884000	0	7972300	5500700	7423100	82508.K1VR19	2.59e-287	803	COG1131@1|root,KOG0061@2759|Eukaryota,38CVQ@33154|Opisthokonta,3Q3MQ@4751|Fungi	4751|Fungi	Q	ABC-2 type transporter	NA	NA	NA	NA	ABC2_membrane,ABC_tran	OTHER	1	0	NA	NA	NA	NA	NA	NA
345288	NA	NA	NA	NA	By MS/MS	By MS/MS	0	0	0	0	7348100	8073600	0	0	0	0	0	0	82508.K1VIQ1	8.19e-211	600	KOG0021@1|root,KOG0021@2759|Eukaryota,38D2F@33154|Opisthokonta,3NU0F@4751|Fungi,3UYPD@5204|Basidiomycota,3VDZT@5234|Tremellales	4751|Fungi	Q	Eukaryotic glutathione synthase	GSH2	GO:0000166,GO:0000287,GO:0003674,GO:0003824,GO:0004363,GO:0005488,GO:0005515,GO:0005524,GO:0005575,GO:0005622,GO:0005623,GO:0005737,GO:0005829,GO:0006082,GO:0006518,GO:0006520,GO:0006575,GO:0006749,GO:0006750,GO:0006790,GO:0006807,GO:0006810,GO:0006811,GO:0006820,GO:0006857,GO:0006950,GO:0008144,GO:0008150,GO:0008152,GO:0009058,GO:0009636,GO:0009987,GO:0010035,GO:0010038,GO:0015711,GO:0015833,GO:…	ko:K21456	ko00270,ko00480,ko01100,ko04216,map00270,map00480,map01100,map04216	GSH_synth_ATP	OTHER	1	0	NA	NA	NA	NA	NA	NA
345293	By matching	By matching	By matching	By MS/MS	By MS/MS	By MS/MS	3581100	12731000	2540400	97554000	196250000	224420000	0	5818800	0	13500000	11381000	27081000	552467.XP_003192986.1	7.94e-181	507	COG0157@1|root,KOG3008@2759|Eukaryota,38D18@33154|Opisthokonta,3NUQX@4751|Fungi,3UYRT@5204|Basidiomycota,3VE96@5234|Tremellales	4751|Fungi	H	Involved in the catabolism of quinolinic acid (QA)	BNA6	GO:0003674,GO:0003824,GO:0004514,GO:0005575,GO:0005622,GO:0005623,GO:0005634,GO:0005737,GO:0006082,GO:0006139,GO:0006520,GO:0006568,GO:0006576,GO:0006586,GO:0006725,GO:0006732,GO:0006733,GO:0006753,GO:0006793,GO:0006796,GO:0006807,GO:0008150,GO:0008152,GO:0009056,GO:0009058,GO:0009072,GO:0009108,GO:0009117,GO:0009165,GO:0009308,GO:0009435,GO:0009987,GO:0016054,GO:0016740,GO:0016757,GO:0016763,GO:…	ko:K00767	ko00760,ko01100,map00760,map01100	QRPTase_C,QRPTase_N	OTHER	0.997491	0.002536	NA	NA	NA	NA	NA	NA
345294	By MS/MS	By MS/MS	By MS/MS	By MS/MS	By MS/MS	By MS/MS	328170000	519900000	289690000	537000000	1364500000	1021500000	81404000	70026000	69713000	57304000	76069000	100710000	5217.XP_007006036.1	1.69e-176	498	COG0176@1|root,KOG2772@2759|Eukaryota,38BFF@33154|Opisthokonta,3NUE1@4751|Fungi,3UY32@5204|Basidiomycota,3VF6Z@5234|Tremellales	4751|Fungi	G	Transaldolase is important for the balance of metabolites in the pentose-phosphate pathway	NA	NA	ko:K00616	ko00030,ko01100,ko01110,ko01120,ko01130,ko01200,ko01230,map00030,map01100,map01110,map01120,map01130,map01200,map01230	TAL_FSA	OTHER	1	0	NA	NA	NA	NA	NA	NA
345311	By MS/MS	By MS/MS	By MS/MS	By MS/MS	By MS/MS	By MS/MS	2208900000	958720000	1109800000	1243600000	5746700000	5859300000	819380000	198660000	414320000	195890000	450000000	729830000	5207.AAW47197	2.08e-232	659	28HEQ@1|root,2QPST@2759|Eukaryota,38D0H@33154|Opisthokonta,3NX0F@4751|Fungi,3UZR8@5204|Basidiomycota,3VDKN@5234|Tremellales	4751|Fungi	G	Splits internally a 1,3-beta-glucan molecule and transfers the newly generated reducing end (the donor) to the non- reducing end of another 1,3-beta-glucan molecule (the acceptor) forming a 1,3-beta linkage, resulting in the elongation of 1,3- beta-glucan chains in the cell wall	PHR2	GO:0000271,GO:0000278,GO:0000281,GO:0000902,GO:0000910,GO:0000917,GO:0000935,GO:0000936,GO:0003674,GO:0003824,GO:0005575,GO:0005576,GO:0005618,GO:0005621,GO:0005622,GO:0005623,GO:0005634,GO:0005737,GO:0005739,GO:0005798,GO:0005886,GO:0005933,GO:0005975,GO:0005976,GO:0006073,GO:0006074,GO:0006075,GO:0006325,GO:0006342,GO:0006355,GO:0006996,GO:0007049,GO:0007155,GO:0007163,GO:0008150,GO:0008152,GO:…	NA	NA	Glyco_hydro_72,X8	SP	0.000249	0.999754	CS pos: 19-20. Pr: 0.9769	GH	GH72	NA	GH72:4.1	GH72*4
345493	By MS/MS	NA	NA	By MS/MS	By MS/MS	By MS/MS	1571200	0	0	150660000	62328000	49113000	0	0	0	0	0	0	82508.K1VMM4	0	1164	KOG2226@1|root,KOG2226@2759|Eukaryota,38DJJ@33154|Opisthokonta,3NXVD@4751|Fungi,3UZRI@5204|Basidiomycota,3VD57@5234|Tremellales	4751|Fungi	S	Dyggve-Melchior-Clausen syndrome protein	NA	GO:0000138,GO:0005575,GO:0005622,GO:0005623,GO:0005737,GO:0005794,GO:0005795,GO:0005797,GO:0006810,GO:0006886,GO:0008104,GO:0008150,GO:0012505,GO:0015031,GO:0015833,GO:0016020,GO:0031984,GO:0031985,GO:0033036,GO:0034613,GO:0042886,GO:0043226,GO:0043227,GO:0043229,GO:0043231,GO:0044422,GO:0044424,GO:0044431,GO:0044444,GO:0044446,GO:0044464,GO:0045184,GO:0046907,GO:0051179,GO:0051234,GO:0051641,GO:…	NA	NA	Hid1	OTHER	1	3.1e-05	NA	NA	NA	NA	NA	NA
345700	NA	NA	NA	NA	By MS/MS	NA	0	0	0	0	3028000	0	0	0	0	0	0	0	552467.XP_003191585.1	4.61e-101	303	KOG3060@1|root,KOG3060@2759|Eukaryota,39G9G@33154|Opisthokonta,3NW3W@4751|Fungi,3V15K@5204|Basidiomycota,3VEYS@5234|Tremellales	4751|Fungi	S	TPR-like protein	oca3	GO:0005575,GO:0005622,GO:0005623,GO:0005737,GO:0005783,GO:0005789,GO:0006457,GO:0008150,GO:0009987,GO:0012505,GO:0016020,GO:0016021,GO:0016043,GO:0022406,GO:0030176,GO:0031224,GO:0031227,GO:0031984,GO:0032991,GO:0034975,GO:0042175,GO:0043226,GO:0043227,GO:0043229,GO:0043231,GO:0044422,GO:0044424,GO:0044425,GO:0044432,GO:0044444,GO:0044446,GO:0044464,GO:0051179,GO:0051640,GO:0051641,GO:0071840,GO:…	NA	NA	TPR_16,TPR_19,TPR_8	OTHER	1	0	NA	NA	NA	NA	NA	NA
345712	By MS/MS	By MS/MS	By MS/MS	By MS/MS	By MS/MS	By MS/MS	9655600	51734000	15232000	33052000	49577000	32288000	6031600	9139600	4854100	5598300	5138000	3717200	82508.K1VZN0	1.14e-231	661	KOG2460@1|root,KOG2460@2759|Eukaryota,38E9N@33154|Opisthokonta,3NWNZ@4751|Fungi,3V076@5204|Basidiomycota,3VE3H@5234|Tremellales	4751|Fungi	J	Signal-recognition-particle assembly has a crucial role in targeting secretory proteins to the rough endoplasmic reticulum membrane	SRP68	GO:0003674,GO:0005047,GO:0005488,GO:0005575,GO:0005622,GO:0005623,GO:0005634,GO:0005737,GO:0005783,GO:0005786,GO:0006605,GO:0006612,GO:0006613,GO:0006614,GO:0006616,GO:0006617,GO:0006810,GO:0006886,GO:0008104,GO:0008150,GO:0009987,GO:0012505,GO:0015031,GO:0015833,GO:0016043,GO:0022607,GO:0031974,GO:0031981,GO:0032991,GO:0033036,GO:0033365,GO:0034399,GO:0034613,GO:0034622,GO:0042886,GO:0043021,GO:…	ko:K03107	ko03060,map03060	SRP68	OTHER	1	0	NA	NA	NA	NA	NA	NA
345862	By MS/MS	By MS/MS	By MS/MS	By MS/MS	By MS/MS	By MS/MS	28646000	91246000	27525000	12291000	129000000	57938000	10198000	20394000	12092000	5129600	8801000	5352800	82508.K1WQ94	9.09e-290	800	COG0111@1|root,KOG0068@2759|Eukaryota,38GJA@33154|Opisthokonta,3NU0Y@4751|Fungi,3UY0A@5204|Basidiomycota,3VEEA@5234|Tremellales	4751|Fungi	E	d-3-phosphoglycerate dehydrogenase 2	SER33	GO:0003674,GO:0003824,GO:0004617,GO:0005575,GO:0005622,GO:0005623,GO:0005737,GO:0006082,GO:0006520,GO:0006563,GO:0006564,GO:0006807,GO:0008150,GO:0008152,GO:0008652,GO:0009058,GO:0009069,GO:0009070,GO:0009987,GO:0016053,GO:0016491,GO:0016614,GO:0016616,GO:0019752,GO:0043436,GO:0044237,GO:0044238,GO:0044249,GO:0044281,GO:0044283,GO:0044424,GO:0044464,GO:0046394,GO:0047545,GO:0055114,GO:0061759,GO:…	ko:K00058	ko00260,ko00680,ko01100,ko01120,ko01130,ko01200,ko01230,map00260,map00680,map01100,map01120,map01130,map01200,map01230	2-Hacid_dh,2-Hacid_dh_C	OTHER	1	3e-06	NA	NA	NA	NA	NA	NA
345898	By MS/MS	By MS/MS	By MS/MS	By matching	By MS/MS	By matching	416380000	310220000	163350000	38952000	67171000	14446000	0	0	0	0	0	0	552467.XP_003191643.1	2.12e-138	404	COG0692@1|root,KOG2994@2759|Eukaryota,38HPB@33154|Opisthokonta,3NWWC@4751|Fungi,3UZ2K@5204|Basidiomycota,3VD37@5234|Tremellales	4751|Fungi	L	Excises uracil residues from the DNA which can arise as a result of misincorporation of dUMP residues by DNA polymerase or due to deamination of cytosine	UNG1	GO:0003674,GO:0003824,GO:0004844,GO:0005575,GO:0005622,GO:0005623,GO:0005634,GO:0005737,GO:0005739,GO:0006139,GO:0006259,GO:0006281,GO:0006284,GO:0006285,GO:0006725,GO:0006807,GO:0006950,GO:0006974,GO:0008150,GO:0008152,GO:0009987,GO:0016787,GO:0016798,GO:0016799,GO:0019104,GO:0033554,GO:0034641,GO:0043170,GO:0043226,GO:0043227,GO:0043229,GO:0043231,GO:0044237,GO:0044238,GO:0044260,GO:0044424,GO:…	ko:K03648	ko03410,ko05340,map03410,map05340	UDG	OTHER	1	0	NA	NA	NA	NA	NA	NA
345908	By MS/MS	By MS/MS	NA	By MS/MS	By MS/MS	By MS/MS	3149600	3701700	0	21363000	55143000	15521000	0	0	0	5159000	4231400	2825400	552467.XP_003191719.1	3.02e-58	186	KOG3407@1|root,KOG3407@2759|Eukaryota,3A96G@33154|Opisthokonta,3P5I4@4751|Fungi,3VC2Y@5204|Basidiomycota,3VFQN@5234|Tremellales	4751|Fungi	S	cwf18 pre-mRNA splicing factor	NA	NA	ko:K12871	ko03040,map03040	cwf18	OTHER	1	0	NA	NA	NA	NA	NA	NA
346024	NA	NA	NA	NA	By MS/MS	By matching	0	0	0	0	4309000	5032500	0	0	0	0	0	0	552467.XP_003195305.1	3.01e-189	555	COG0624@1|root,KOG2275@2759|Eukaryota,39RWD@33154|Opisthokonta,3NU4A@4751|Fungi,3UZMD@5204|Basidiomycota	4751|Fungi	E	Carboxypeptidase s	NA	GO:0000322,GO:0000323,GO:0000324,GO:0000328,GO:0003674,GO:0003824,GO:0004180,GO:0005575,GO:0005622,GO:0005623,GO:0005737,GO:0005773,GO:0005775,GO:0006508,GO:0006807,GO:0008150,GO:0008152,GO:0008233,GO:0008238,GO:0009056,GO:0009057,GO:0009987,GO:0016787,GO:0019538,GO:0030163,GO:0031974,GO:0043170,GO:0043226,GO:0043227,GO:0043229,GO:0043231,GO:0043233,GO:0044237,GO:0044238,GO:0044248,GO:0044257,GO:…	ko:K01293	NA	M20_dimer,Peptidase_M20,Peptidase_M28	SP	0.127085	0.872906	CS pos: 48-49. Pr: 0.6971	NA	NA	NA	NA	NA
346103	NA	NA	NA	By matching	By MS/MS	By matching	0	0	0	5694600	12685000	12833000	0	0	0	0	0	0	5217.XP_007005217.1	1.86e-151	439	COG0639@1|root,KOG0374@2759|Eukaryota,39ZGT@33154|Opisthokonta,3P1A9@4751|Fungi,3UY9Y@5204|Basidiomycota,3VDKY@5234|Tremellales	4751|Fungi	T	Calcineurin-like phosphoesterase	NA	GO:0000298,GO:0000322,GO:0000323,GO:0000324,GO:0000328,GO:0003674,GO:0003824,GO:0005575,GO:0005622,GO:0005623,GO:0005737,GO:0005773,GO:0005775,GO:0006082,GO:0006091,GO:0006112,GO:0006793,GO:0006797,GO:0006798,GO:0008150,GO:0008152,GO:0009056,GO:0009987,GO:0015980,GO:0016462,GO:0016787,GO:0016817,GO:0016818,GO:0031974,GO:0043226,GO:0043227,GO:0043229,GO:0043231,GO:0043233,GO:0043436,GO:0044237,GO:…	NA	NA	Metallophos	OTHER	0.999922	0.000125	NA	NA	NA	NA	NA	NA
346112	By MS/MS	By MS/MS	By matching	By MS/MS	By MS/MS	By MS/MS	1545700	13070000	2021000	78621000	107630000	80102000	0	2958900	0	10450000	5600600	6068900	82508.K1VAF8	5.14e-56	181	29J2Q@1|root,2RSAS@2759|Eukaryota,3ABHZ@33154|Opisthokonta,3P94R@4751|Fungi,3V7ZE@5204|Basidiomycota,3VFPQ@5234|Tremellales	4751|Fungi	S	Yqey-like protein	NA	NA	ko:K09117	NA	YqeY	OTHER	1	0	NA	NA	NA	NA	NA	NA
346188	By matching	By MS/MS	By MS/MS	By MS/MS	By MS/MS	By MS/MS	625040	22239000	0	22896000	32180000	26799000	0	4852100	0	4206600	3401900	3516100	82508.K1VR52	1.59e-146	422	COG2301@1|root,2QQPK@2759|Eukaryota,38GJH@33154|Opisthokonta,3NXCF@4751|Fungi,3V11K@5204|Basidiomycota,3VGP9@5234|Tremellales	4751|Fungi	F	HpcH/HpaI aldolase/citrate lyase family	NA	NA	ko:K11390	NA	HpcH_HpaI	OTHER	1	0	NA	NA	NA	NA	NA	NA
346290	NA	By matching	NA	By MS/MS	By matching	By MS/MS	0	4764700	0	5124400	9549300	5222900	0	0	0	0	0	0	552467.XP_003194713.1	3.18e-158	462	COG2175@1|root,KOG3889@2759|Eukaryota,38CFT@33154|Opisthokonta,3NX3Q@4751|Fungi,3UZU1@5204|Basidiomycota,3VEGV@5234|Tremellales	4751|Fungi	I	Taurine catabolism dioxygenase TauD, TfdA family	NA	NA	ko:K00474	ko00310,map00310	DUF971,TauD	OTHER	1	1e-06	NA	NA	NA	NA	NA	NA
346525	By MS/MS	By MS/MS	By MS/MS	NA	By matching	NA	27384000	18301000	22020000	0	14736000	0	15755000	5399500	13568000	0	1691100	0	82508.K1V6V5	5.11e-77	237	COG3560@1|root,2RYI9@2759|Eukaryota,3A0M4@33154|Opisthokonta,3P1VX@4751|Fungi,3V1TM@5204|Basidiomycota,3VF8F@5234|Tremellales	4751|Fungi	S	Nitroreductase family	HBN1	GO:0003674,GO:0003824,GO:0005575,GO:0005622,GO:0005623,GO:0005634,GO:0005737,GO:0006950,GO:0006979,GO:0008150,GO:0008152,GO:0009892,GO:0009987,GO:0010565,GO:0016491,GO:0016651,GO:0016657,GO:0019216,GO:0019217,GO:0019222,GO:0031323,GO:0031324,GO:0033554,GO:0034599,GO:0042221,GO:0043226,GO:0043227,GO:0043229,GO:0043231,GO:0044424,GO:0044464,GO:0045833,GO:0045922,GO:0048519,GO:0048523,GO:0050789,GO:…	ko:K07078	NA	Nitroreductase	OTHER	1	2.1e-05	NA	NA	NA	NA	NA	NA
346636	By MS/MS	By MS/MS	By MS/MS	By MS/MS	By MS/MS	By MS/MS	43960000	145130000	43044000	113070000	154890000	68615000	10895000	16065000	10818000	19537000	9536400	6229800	82508.K1VKH3	3.94e-245	683	KOG2758@1|root,KOG2758@2759|Eukaryota,38C5H@33154|Opisthokonta,3NWSQ@4751|Fungi,3UZMA@5204|Basidiomycota,3VDBB@5234|Tremellales	4751|Fungi	J	component of the eukaryotic translation initiation factor 3 (eIF-3) complex, which is involved in protein synthesis of a specialized repertoire of mRNAs and, together with other initiation factors, stimulates binding of mRNA and methionyl-tRNAi to the 40S ribosome. The eIF-3 complex specifically targets and initiates translation of a subset of mRNAs involved in cell proliferation	INT6	GO:0001732,GO:0002181,GO:0002183,GO:0003674,GO:0003676,GO:0003723,GO:0003743,GO:0005488,GO:0005575,GO:0005622,GO:0005623,GO:0005634,GO:0005737,GO:0005829,GO:0005852,GO:0006412,GO:0006413,GO:0006518,GO:0006807,GO:0008104,GO:0008135,GO:0008150,GO:0008152,GO:0009058,GO:0009059,GO:0009893,GO:0009894,GO:0009896,GO:0009987,GO:0010467,GO:0010604,GO:0016043,GO:0016282,GO:0019222,GO:0019538,GO:0022607,GO:…	ko:K03250	ko03013,ko05160,map03013,map05160	PCI,eIF3_N	OTHER	1	0	NA	NA	NA	NA	NA	NA
346708	NA	By MS/MS	NA	By MS/MS	By MS/MS	By MS/MS	0	3950600	0	14705000	49436000	4343200	0	1959100	0	3061700	4482800	0	5207.AAW42639	2.71e-168	492	KOG2769@1|root,KOG2769@2759|Eukaryota,38CXJ@33154|Opisthokonta,3NW0X@4751|Fungi,3UYTE@5204|Basidiomycota,3VGI0@5234|Tremellales	4751|Fungi	A	Small nuclear ribonucleoprotein	prp3	GO:0000375,GO:0000377,GO:0000398,GO:0005575,GO:0005622,GO:0005623,GO:0005634,GO:0006139,GO:0006396,GO:0006397,GO:0006725,GO:0006807,GO:0008150,GO:0008152,GO:0008380,GO:0009987,GO:0010467,GO:0016070,GO:0016071,GO:0030532,GO:0032991,GO:0034641,GO:0043170,GO:0043226,GO:0043227,GO:0043229,GO:0043231,GO:0044237,GO:0044238,GO:0044422,GO:0044424,GO:0044428,GO:0044446,GO:0044464,GO:0045292,GO:0046483,GO:…	ko:K12843	ko03040,map03040	DUF1115,PRP3	OTHER	1	0	NA	NA	NA	NA	NA	NA
346739	NA	By MS/MS	By matching	By MS/MS	By MS/MS	By matching	0	6384200	3401900	8091000	0	1629500	0	2741700	0	3067800	0	0	552467.XP_003192911.1	0	1327	KOG1107@1|root,KOG1107@2759|Eukaryota,38DTF@33154|Opisthokonta,3NVAF@4751|Fungi,3UY12@5204|Basidiomycota,3VEEY@5234|Tremellales	4751|Fungi	U	Vacuolar protein sorting-associated protein 35	vps35	GO:0000322,GO:0000323,GO:0000324,GO:0000329,GO:0003674,GO:0005215,GO:0005575,GO:0005622,GO:0005623,GO:0005737,GO:0005768,GO:0005770,GO:0005773,GO:0005774,GO:0006810,GO:0006886,GO:0008104,GO:0008150,GO:0008565,GO:0009987,GO:0012505,GO:0015031,GO:0015833,GO:0016020,GO:0016192,GO:0016197,GO:0016482,GO:0030904,GO:0030906,GO:0031090,GO:0031410,GO:0031982,GO:0032507,GO:0032991,GO:0033036,GO:0033365,GO:…	ko:K18468	ko04144,map04144	Vps35	OTHER	1	0	NA	NA	NA	NA	NA	NA
346785	By matching	NA	By matching	By MS/MS	By MS/MS	By MS/MS	2201400	0	3398300	49087000	158630000	197730000	0	0	0	6898200	6574100	21337000	5217.XP_007005090.1	2.88e-173	512	COG2303@1|root,KOG1238@2759|Eukaryota,38B4J@33154|Opisthokonta,3NU19@4751|Fungi,3V091@5204|Basidiomycota,3VGTB@5234|Tremellales	4751|Fungi	E	GMC oxidoreductase	NA	NA	NA	NA	GMC_oxred_C,GMC_oxred_N	SP	0.001371	0.998605	CS pos: 14-15. Pr: 0.9667	AA	AA3	AA3_2	AA3:6.6	NA
346794	By MS/MS	By MS/MS	By MS/MS	By MS/MS	By MS/MS	By MS/MS	228570000	683780000	271290000	492340000	1527200000	811310000	47274000	78158000	69495000	56033000	61807000	49525000	5217.XP_007000605.1	2e-219	615	COG1960@1|root,KOG0141@2759|Eukaryota,38CQN@33154|Opisthokonta,3NW18@4751|Fungi,3UZEE@5204|Basidiomycota,3VE1R@5234|Tremellales	4751|Fungi	EI	Acyl-CoA dehydrogenase, C-terminal domain	NA	NA	ko:K00253	ko00280,ko01100,map00280,map01100	Acyl-CoA_dh_1,Acyl-CoA_dh_M,Acyl-CoA_dh_N	OTHER	1	0	NA	NA	NA	NA	NA	NA
346865	By MS/MS	By MS/MS	By MS/MS	NA	By MS/MS	By MS/MS	423830000	217810000	220810000	0	158550000	133350000	162110000	29530000	56714000	0	8001200	7499100	5207.AAW41615	1.06e-120	364	2CXRN@1|root,2RZ9J@2759|Eukaryota,3A2ZY@33154|Opisthokonta,3P3HH@4751|Fungi,3V0SW@5204|Basidiomycota,3VEZ3@5234|Tremellales	4751|Fungi	S	Glycosyl hydrolase catalytic core	NA	NA	NA	NA	Glyco_hydro_cc	SP	0.003761	0.996219	CS pos: 24-25. Pr: 0.9367	GH	GH128	NA	GH128:8.1	GH128*24
347036	By matching	By matching	NA	By matching	By MS/MS	By MS/MS	2877900	2594900	0	7043500	20737000	21303000	0	0	0	0	0	0	552467.XP_003192001.1	1.27e-112	326	COG0622@1|root,KOG3325@2759|Eukaryota,38G09@33154|Opisthokonta,3NXQX@4751|Fungi,3V0F3@5204|Basidiomycota,3VF8U@5234|Tremellales	4751|Fungi	U	Vacuolar protein sorting-associated protein 29	vps29	GO:0003674,GO:0003824,GO:0005488,GO:0005575,GO:0005622,GO:0005623,GO:0005737,GO:0005768,GO:0006810,GO:0006886,GO:0008104,GO:0008150,GO:0008270,GO:0012505,GO:0015031,GO:0015833,GO:0016020,GO:0016192,GO:0016197,GO:0016482,GO:0016787,GO:0030904,GO:0030906,GO:0031410,GO:0031982,GO:0032991,GO:0033036,GO:0034613,GO:0042147,GO:0042886,GO:0043167,GO:0043169,GO:0043226,GO:0043227,GO:0043229,GO:0044424,GO:…	ko:K07095,ko:K18467	ko04144,map04144	Metallophos_2	OTHER	1	0	NA	NA	NA	NA	NA	NA
347046	NA	By matching	NA	By matching	By MS/MS	By matching	0	646630	0	2014000	4343700	3217000	0	0	0	0	0	0	82508.K1WV43	5.46e-110	347	KOG3091@1|root,KOG3091@2759|Eukaryota,3988N@33154|Opisthokonta,3Q3BT@4751|Fungi,3UYJJ@5204|Basidiomycota,3VDPU@5234|Tremellales	4751|Fungi	UY	Nucleoporin complex subunit 54	NA	GO:0003674,GO:0005198,GO:0005575,GO:0005622,GO:0005623,GO:0005634,GO:0005635,GO:0005643,GO:0005737,GO:0006403,GO:0006405,GO:0006407,GO:0006606,GO:0006607,GO:0006611,GO:0006810,GO:0006886,GO:0006913,GO:0006996,GO:0006997,GO:0006999,GO:0008104,GO:0008150,GO:0009987,GO:0012505,GO:0015031,GO:0015833,GO:0015931,GO:0016043,GO:0017038,GO:0017056,GO:0022613,GO:0031503,GO:0031967,GO:0031974,GO:0031975,GO:…	ko:K14308	ko03013,map03013	Nucleoporin_FG,Nup54	OTHER	1	0	NA	NA	NA	NA	NA	NA
347063	By MS/MS	By MS/MS	NA	By matching	By matching	By matching	3002400	5682200	0	6431600	4058100	3919300	0	0	0	0	0	0	5217.XP_007004842.1	0	1019	COG5158@1|root,KOG1299@2759|Eukaryota,38CY7@33154|Opisthokonta,3NXAG@4751|Fungi,3UZ73@5204|Basidiomycota,3VER7@5234|Tremellales	4751|Fungi	U	Belongs to the STXBP unc-18 SEC1 family	VPS45	GO:0000011,GO:0000139,GO:0000149,GO:0003674,GO:0005488,GO:0005515,GO:0005575,GO:0005622,GO:0005623,GO:0005737,GO:0005768,GO:0005794,GO:0005829,GO:0006605,GO:0006623,GO:0006810,GO:0006873,GO:0006885,GO:0006886,GO:0006892,GO:0006895,GO:0006896,GO:0006906,GO:0006996,GO:0007033,GO:0007034,GO:0007035,GO:0008104,GO:0008150,GO:0009987,GO:0010638,GO:0012505,GO:0015031,GO:0015833,GO:0016020,GO:0016043,GO:…	ko:K12479,ko:K20367	ko04138,ko04144,map04138,map04144	Sec1	OTHER	1	0	NA	NA	NA	NA	NA	NA
347188	By matching	By MS/MS	By MS/MS	By MS/MS	By MS/MS	NA	4593000	14065000	3568300	9343500	10380000	0	0	0	0	0	0	0	5207.AAW44364	0	897	KOG2515@1|root,KOG2515@2759|Eukaryota,38CWJ@33154|Opisthokonta,3NV47@4751|Fungi,3UYKJ@5204|Basidiomycota,3VCTN@5234|Tremellales	4751|Fungi	G	Alg9-like mannosyltransferase family	ALG9	GO:0000030,GO:0003674,GO:0003824,GO:0004376,GO:0005575,GO:0005622,GO:0005623,GO:0005737,GO:0005783,GO:0005789,GO:0006464,GO:0006486,GO:0006487,GO:0006488,GO:0006490,GO:0006629,GO:0006807,GO:0008150,GO:0008152,GO:0009058,GO:0009059,GO:0009100,GO:0009101,GO:0009987,GO:0012505,GO:0016020,GO:0016021,GO:0016740,GO:0016757,GO:0016758,GO:0019538,GO:0030176,GO:0031224,GO:0031227,GO:0031984,GO:0034645,GO:…	ko:K03846	ko00510,ko00513,ko01100,map00510,map00513,map01100	Glyco_transf_22	OTHER	0.999933	9.3e-05	NA	GT	GT22	NA	GT22:1.4	GT22*1
347336	By MS/MS	By MS/MS	By MS/MS	By MS/MS	By MS/MS	By MS/MS	37591000	102760000	24431000	77779000	415510000	113580000	19870000	24532000	14914000	18042000	21773000	15776000	82508.K1VAJ3	2.78e-265	742	COG1498@1|root,KOG2572@2759|Eukaryota,38CK4@33154|Opisthokonta,3NUJ8@4751|Fungi,3UYPU@5204|Basidiomycota,3VCRV@5234|Tremellales	4751|Fungi	A	NOSIC (NUC001) domain	NOP58	GO:0000154,GO:0000447,GO:0000460,GO:0000462,GO:0000466,GO:0000469,GO:0000472,GO:0000478,GO:0000479,GO:0000480,GO:0000966,GO:0000967,GO:0003674,GO:0003676,GO:0003723,GO:0003729,GO:0005488,GO:0005575,GO:0005622,GO:0005623,GO:0005634,GO:0005730,GO:0005732,GO:0006139,GO:0006364,GO:0006396,GO:0006725,GO:0006807,GO:0008150,GO:0008152,GO:0009451,GO:0009987,GO:0010467,GO:0016070,GO:0016072,GO:0022613,GO:…	ko:K14565	ko03008,map03008	NOP5NT,Nop	OTHER	1	2e-06	NA	NA	NA	NA	NA	NA
347341	By matching	By MS/MS	By matching	By MS/MS	By MS/MS	By MS/MS	15067000	29229000	3536400	25222000	41927000	39276000	8380600	8329300	0	7732500	5719400	6043500	5207.AAW43938	2.05e-170	482	COG0345@1|root,KOG3124@2759|Eukaryota,39QSG@33154|Opisthokonta,3NVU1@4751|Fungi,3UYUF@5204|Basidiomycota,3VGRA@5234|Tremellales	4751|Fungi	E	Belongs to the pyrroline-5-carboxylate reductase family	PRO3	GO:0003674,GO:0003824,GO:0004735,GO:0005575,GO:0005622,GO:0005623,GO:0005737,GO:0006082,GO:0006520,GO:0006560,GO:0006561,GO:0006807,GO:0008150,GO:0008152,GO:0008652,GO:0009058,GO:0009064,GO:0009084,GO:0009987,GO:0016053,GO:0016491,GO:0016645,GO:0016646,GO:0018130,GO:0019752,GO:0043436,GO:0044237,GO:0044238,GO:0044249,GO:0044281,GO:0044283,GO:0044424,GO:0044464,GO:0046394,GO:0046483,GO:0055114,GO:…	ko:K00286	ko00330,ko01100,ko01110,ko01130,ko01230,map00330,map01100,map01110,map01130,map01230	F420_oxidored,P5CR_dimer	OTHER	0.999865	0.000173	NA	NA	NA	NA	NA	NA
347417	NA	NA	NA	NA	By MS/MS	By MS/MS	0	0	0	0	10156000	15672000	0	0	0	0	0	0	82508.K1W2R7	0	1011	COG1506@1|root,KOG2100@2759|Eukaryota,38BKR@33154|Opisthokonta,3NUI5@4751|Fungi,3UZ18@5204|Basidiomycota,3VE22@5234|Tremellales	4751|Fungi	O	Dipeptidyl peptidase IV (DPP IV) N-terminal region	dpp4	GO:0003674,GO:0003824,GO:0004177,GO:0005575,GO:0005576,GO:0006508,GO:0006807,GO:0008150,GO:0008152,GO:0008233,GO:0008238,GO:0008239,GO:0009056,GO:0009057,GO:0009987,GO:0010467,GO:0016485,GO:0016787,GO:0019538,GO:0030163,GO:0043170,GO:0044237,GO:0044238,GO:0044248,GO:0044257,GO:0044260,GO:0044265,GO:0044267,GO:0051603,GO:0051604,GO:0070011,GO:0071704,GO:0140096,GO:1901564,GO:1901565,GO:1901575	ko:K01278,ko:K01282	ko04974,map04974	DPPIV_N,Peptidase_S9	OTHER	1	1e-06	NA	NA	NA	NA	NA	NA
347588	NA	NA	NA	By matching	By MS/MS	NA	0	0	0	3089200	5558400	0	0	0	0	0	0	0	82508.K1V5M0	1.9e-135	397	COG3568@1|root,2S5BH@2759|Eukaryota,39RG3@33154|Opisthokonta,3P5XB@4751|Fungi,3V1KA@5204|Basidiomycota,3VD1R@5234|Tremellales	4751|Fungi	G	Endonuclease/Exonuclease/phosphatase family	NA	NA	NA	NA	Exo_endo_phos	OTHER	1	0	NA	NA	NA	NA	NA	NA
347659	By MS/MS	By MS/MS	By MS/MS	By MS/MS	By MS/MS	By MS/MS	34890000	56593000	30208000	53788000	165200000	170720000	11951000	11877000	12907000	10323000	10619000	14030000	82508.K1VTE4	1.75e-101	299	KOG3221@1|root,KOG3221@2759|Eukaryota,392MM@33154|Opisthokonta,3NWPX@4751|Fungi,3V0JW@5204|Basidiomycota,3VEZX@5234|Tremellales	4751|Fungi	G	Glycolipid transfer protein (GLTP)	NA	NA	NA	NA	GLTP	OTHER	1	5e-06	NA	NA	NA	NA	NA	NA
347691	NA	By MS/MS	NA	NA	NA	NA	0	4729500	0	0	0	0	0	0	0	0	0	0	82508.K1VGA6	0	1035	COG0129@1|root,KOG2448@2759|Eukaryota,39XGH@33154|Opisthokonta,3P0E0@4751|Fungi,3V4SM@5204|Basidiomycota,3VCZT@5234|Tremellales	4751|Fungi	E	Dehydratase family	NA	NA	ko:K01687	ko00290,ko00770,ko01100,ko01110,ko01130,ko01210,ko01230,map00290,map00770,map01100,map01110,map01130,map01210,map01230	ILVD_EDD	OTHER	1	1e-06	NA	NA	NA	NA	NA	NA
347764	By MS/MS	By matching	By MS/MS	By matching	By MS/MS	By MS/MS	4504200	10462000	6972100	2225200	18181000	25001000	0	2897600	0	0	0	3784000	552467.XP_003194739.1	1.66e-135	392	KOG3170@1|root,KOG3170@2759|Eukaryota,39UCF@33154|Opisthokonta,3NYDG@4751|Fungi,3V1HD@5204|Basidiomycota,3VDAC@5234|Tremellales	4751|Fungi	T	Phosducin	PLP2	GO:0003674,GO:0003779,GO:0005488,GO:0005515,GO:0005575,GO:0005622,GO:0005623,GO:0005737,GO:0006139,GO:0006355,GO:0006357,GO:0006457,GO:0006725,GO:0006807,GO:0007329,GO:0008092,GO:0008150,GO:0008152,GO:0008616,GO:0009058,GO:0009116,GO:0009119,GO:0009163,GO:0009371,GO:0009373,GO:0009889,GO:0009891,GO:0009893,GO:0009987,GO:0010033,GO:0010468,GO:0010556,GO:0010557,GO:0010604,GO:0010628,GO:0018130,GO:…	NA	NA	Phosducin	OTHER	1	0	NA	NA	NA	NA	NA	NA
347815	NA	NA	NA	NA	By MS/MS	By matching	0	0	0	0	71248000	3151600	0	0	0	0	0	0	82508.K1VTB8	3.8e-244	723	COG0349@1|root,KOG2206@2759|Eukaryota,38D24@33154|Opisthokonta,3NVCS@4751|Fungi,3UYQP@5204|Basidiomycota,3VE2C@5234|Tremellales	4751|Fungi	J	3'-5' exonuclease	RRP6	GO:0000175,GO:0000176,GO:0000178,GO:0000228,GO:0000459,GO:0000460,GO:0000466,GO:0000467,GO:0000469,GO:0000785,GO:0000790,GO:0000956,GO:0000972,GO:0000973,GO:0003674,GO:0003824,GO:0004518,GO:0004527,GO:0004532,GO:0004540,GO:0005575,GO:0005622,GO:0005623,GO:0005634,GO:0005654,GO:0005694,GO:0005730,GO:0006139,GO:0006364,GO:0006396,GO:0006399,GO:0006401,GO:0006402,GO:0006403,GO:0006725,GO:0006807,GO:…	ko:K12591	ko03018,map03018	DNA_pol_A_exo1,HRDC,PMC2NT	OTHER	1	0	NA	NA	NA	NA	NA	NA
347818	By matching	By MS/MS	By matching	By MS/MS	By MS/MS	By MS/MS	1417100	7278800	3334400	26683000	20002000	11716000	0	0	0	0	2728300	2231500	82508.K1W1D8	5.06e-113	333	KOG4548@1|root,KOG4548@2759|Eukaryota,38ESK@33154|Opisthokonta,3P021@4751|Fungi,3V1P2@5204|Basidiomycota,3VEVK@5234|Tremellales	4751|Fungi	J	39S mitochondrial ribosomal protein L46	NA	GO:0000313,GO:0000315,GO:0003674,GO:0003735,GO:0005198,GO:0005575,GO:0005622,GO:0005623,GO:0005737,GO:0005739,GO:0005759,GO:0005761,GO:0005762,GO:0005840,GO:0006412,GO:0006518,GO:0006807,GO:0008150,GO:0008152,GO:0009058,GO:0009059,GO:0009987,GO:0010467,GO:0015934,GO:0019538,GO:0031974,GO:0032543,GO:0032991,GO:0034641,GO:0034645,GO:0043043,GO:0043170,GO:0043226,GO:0043227,GO:0043228,GO:0043229,GO:…	ko:K17427	NA	MRP-L46,NUDIX	OTHER	1	0	NA	NA	NA	NA	NA	NA
347999	By MS/MS	By MS/MS	By MS/MS	By MS/MS	By MS/MS	By MS/MS	160660000	417800000	185030000	463430000	643860000	443190000	27119000	45649000	33349000	36760000	24520000	21083000	5207.AAW42292	5.779999979663e-316	864	COG4284@1|root,KOG2638@2759|Eukaryota,38CTH@33154|Opisthokonta,3NWDG@4751|Fungi,3UY6T@5204|Basidiomycota,3VCSZ@5234|Tremellales	4751|Fungi	G	UTP--glucose-1-phosphate uridylyltransferase	UGP1	GO:0000271,GO:0003674,GO:0003824,GO:0003983,GO:0005575,GO:0005618,GO:0005622,GO:0005623,GO:0005737,GO:0005886,GO:0005975,GO:0005976,GO:0005977,GO:0005978,GO:0005984,GO:0005991,GO:0005992,GO:0006011,GO:0006073,GO:0006077,GO:0006078,GO:0006091,GO:0006112,GO:0006139,GO:0006464,GO:0006486,GO:0006725,GO:0006793,GO:0006807,GO:0008150,GO:0008152,GO:0009058,GO:0009059,GO:0009100,GO:0009101,GO:0009225,GO:…	ko:K00963	ko00040,ko00052,ko00500,ko00520,ko01100,ko01130,map00040,map00052,map00500,map00520,map01100,map01130	UDPGP	OTHER	1	0	NA	NA	NA	NA	NA	NA
348037	NA	By MS/MS	By MS/MS	By MS/MS	By MS/MS	By MS/MS	0	3819700	8078500	94113000	213120000	90455000	0	0	5777200	16516000	19599000	11467000	5207.AAW43710	1.94e-26	106	294AX@1|root,2RB83@2759|Eukaryota,3AXPF@33154|Opisthokonta,3PIUD@4751|Fungi,3V81R@5204|Basidiomycota,3VG3G@5234|Tremellales	4751|Fungi	-	-	NA	NA	NA	NA	Ribosomal_L28	OTHER	1	0	NA	NA	NA	NA	NA	NA
348170	By MS/MS	By MS/MS	By MS/MS	By MS/MS	By MS/MS	By MS/MS	11599000	31037000	12548000	35620000	102600000	50418000	5394700	11411000	8006200	7958400	5471700	4570600	552467.XP_003197298.1	1.14e-277	766	COG1222@1|root,KOG0652@2759|Eukaryota,38BDY@33154|Opisthokonta,3NV1G@4751|Fungi,3UZ0Z@5204|Basidiomycota,3VE3E@5234|Tremellales	4751|Fungi	O	ATPase family associated with various cellular activities (AAA)	RPT5	GO:0000166,GO:0000502,GO:0003674,GO:0003824,GO:0005488,GO:0005515,GO:0005524,GO:0005575,GO:0005622,GO:0005623,GO:0005634,GO:0005737,GO:0005829,GO:0005838,GO:0006355,GO:0006357,GO:0006508,GO:0006511,GO:0006807,GO:0006950,GO:0007088,GO:0007346,GO:0008134,GO:0008144,GO:0008150,GO:0008152,GO:0008540,GO:0009056,GO:0009057,GO:0009889,GO:0009891,GO:0009893,GO:0009894,GO:0009896,GO:0009987,GO:0010033,GO:…	ko:K03065	ko03050,ko05169,map03050,map05169	AAA	OTHER	1	3e-06	NA	NA	NA	NA	NA	NA
348290	By MS/MS	By MS/MS	NA	By MS/MS	By MS/MS	By MS/MS	2429300	7482400	0	7856000	13332000	9401400	0	0	0	0	0	0	552467.XP_003193465.1	3.24e-120	347	KOG0121@1|root,KOG0121@2759|Eukaryota,3A00F@33154|Opisthokonta,3P268@4751|Fungi,3V0TD@5204|Basidiomycota,3VF4N@5234|Tremellales	4751|Fungi	A	Nuclear cap-binding protein subunit 2	CBC2	GO:0000243,GO:0000339,GO:0000375,GO:0000377,GO:0000398,GO:0003674,GO:0003676,GO:0003723,GO:0005488,GO:0005575,GO:0005622,GO:0005623,GO:0005634,GO:0005681,GO:0005684,GO:0005846,GO:0006139,GO:0006396,GO:0006397,GO:0006725,GO:0006807,GO:0008150,GO:0008152,GO:0008380,GO:0009987,GO:0010467,GO:0016070,GO:0016071,GO:0032991,GO:0034518,GO:0034641,GO:0043170,GO:0043226,GO:0043227,GO:0043229,GO:0043231,GO:…	ko:K12883	ko03013,ko03015,ko03040,map03013,map03015,map03040	RRM_1	OTHER	1	4e-06	NA	NA	NA	NA	NA	NA
348397	By matching	By MS/MS	NA	By matching	By MS/MS	By MS/MS	231680	2622400	0	351810	9958900	4764300	0	730780	0	0	1830400	0	5207.AAW41765	2.42e-256	761	KOG2398@1|root,KOG2398@2759|Eukaryota,39SSY@33154|Opisthokonta,3NVT9@4751|Fungi,3UY8T@5204|Basidiomycota,3VCZC@5234|Tremellales	4751|Fungi	D	Fes/CIP4 homology domain	HOF1	GO:0000142,GO:0000144,GO:0000278,GO:0000281,GO:0000399,GO:0000910,GO:0000912,GO:0000915,GO:0000917,GO:0001786,GO:0003674,GO:0005488,GO:0005515,GO:0005543,GO:0005547,GO:0005575,GO:0005622,GO:0005623,GO:0005737,GO:0005826,GO:0005856,GO:0005886,GO:0005933,GO:0005935,GO:0005937,GO:0005938,GO:0005940,GO:0006810,GO:0006897,GO:0006898,GO:0006950,GO:0006974,GO:0006996,GO:0007010,GO:0007016,GO:0007029,GO:…	ko:K20121	NA	FCH,SH3_1	OTHER	0.99681	0.003233	NA	NA	NA	NA	NA	NA
348515	NA	By MS/MS	By matching	By MS/MS	By MS/MS	By MS/MS	0	19988000	2760700	4547700	30470000	8691000	0	5289100	0	0	4639600	0	82508.K1VN91	1.08e-269	758	COG3961@1|root,KOG1184@2759|Eukaryota,38SA8@33154|Opisthokonta,3NUUP@4751|Fungi,3UYQ5@5204|Basidiomycota,3VEDP@5234|Tremellales	4751|Fungi	EH	Thiamine pyrophosphate enzyme, N-terminal TPP binding domain	NA	GO:0000947,GO:0000949,GO:0000955,GO:0003674,GO:0003824,GO:0004737,GO:0005575,GO:0005622,GO:0005623,GO:0005975,GO:0005996,GO:0006006,GO:0006066,GO:0006067,GO:0006082,GO:0006090,GO:0006091,GO:0006113,GO:0006115,GO:0006139,GO:0006163,GO:0006520,GO:0006558,GO:0006559,GO:0006568,GO:0006569,GO:0006576,GO:0006586,GO:0006725,GO:0006732,GO:0006733,GO:0006753,GO:0006793,GO:0006796,GO:0006807,GO:0008150,GO:…	ko:K01568	ko00010,ko01100,ko01110,ko01130,map00010,map01100,map01110,map01130	TPP_enzyme_C,TPP_enzyme_M,TPP_enzyme_N	OTHER	1	0	NA	NA	NA	NA	NA	NA
348634	By matching	By matching	By matching	By MS/MS	By MS/MS	By matching	6820400	5757600	2056100	9420400	16858000	5224100	0	0	0	0	0	0	82508.K1VMI8	0	874	COG1398@1|root,COG5274@1|root,KOG0537@2759|Eukaryota,KOG1600@2759|Eukaryota,38GU7@33154|Opisthokonta,3NU4E@4751|Fungi,3UYFC@5204|Basidiomycota,3VDSH@5234|Tremellales	4751|Fungi	CI	Fatty acid desaturase	OLE1	GO:0000001,GO:0003674,GO:0003824,GO:0004768,GO:0005575,GO:0005622,GO:0005623,GO:0005737,GO:0005783,GO:0005789,GO:0006082,GO:0006091,GO:0006629,GO:0006631,GO:0006633,GO:0006636,GO:0006996,GO:0007005,GO:0008150,GO:0008152,GO:0008610,GO:0009055,GO:0009058,GO:0009987,GO:0012505,GO:0016020,GO:0016021,GO:0016043,GO:0016053,GO:0016215,GO:0016491,GO:0016705,GO:0016717,GO:0019752,GO:0022900,GO:0030176,GO:…	ko:K00507	ko01040,ko01212,ko03320,ko04152,ko04212,map01040,map01212,map03320,map04152,map04212	Cyt-b5,FA_desaturase	OTHER	0.999648	0.000351	NA	NA	NA	NA	NA	NA
348727	By MS/MS	By MS/MS	NA	By MS/MS	By MS/MS	By MS/MS	6638600	5159100	0	50802000	92214000	34338000	0	0	0	14709000	11103000	9137400	82508.K1VL37	7.16e-208	595	COG5176@1|root,KOG0119@2759|Eukaryota,38GV3@33154|Opisthokonta,3NTZU@4751|Fungi,3UXTZ@5204|Basidiomycota,3VD60@5234|Tremellales	4751|Fungi	A	Splicing factor 1 helix-hairpin domain	BBP	GO:0000243,GO:0000375,GO:0000377,GO:0000398,GO:0003674,GO:0003676,GO:0003723,GO:0005488,GO:0005575,GO:0005622,GO:0005623,GO:0005634,GO:0005681,GO:0005684,GO:0005737,GO:0005829,GO:0006139,GO:0006396,GO:0006397,GO:0006725,GO:0006807,GO:0008150,GO:0008152,GO:0008380,GO:0009987,GO:0010467,GO:0016070,GO:0016071,GO:0032991,GO:0034641,GO:0036002,GO:0043170,GO:0043226,GO:0043227,GO:0043229,GO:0043231,GO:…	ko:K13095	NA	KH_1,SF1-HH,zf-CCHC	OTHER	1	0	NA	NA	NA	NA	NA	NA
348760	By MS/MS	By MS/MS	NA	NA	By matching	NA	0	11858000	0	0	9846400	0	0	0	0	0	0	0	82508.K1VWL5	0	1307	COG0451@1|root,COG0471@1|root,KOG1281@2759|Eukaryota,KOG1502@2759|Eukaryota,38C60@33154|Opisthokonta,3NVM5@4751|Fungi,3UYZS@5204|Basidiomycota,3VDSJ@5234|Tremellales	4751|Fungi	P	Citrate transporter	PHO91	GO:0000322,GO:0000323,GO:0000324,GO:0000329,GO:0003674,GO:0005215,GO:0005315,GO:0005575,GO:0005622,GO:0005623,GO:0005737,GO:0005773,GO:0005774,GO:0006082,GO:0006793,GO:0006797,GO:0006810,GO:0006811,GO:0006817,GO:0006820,GO:0008150,GO:0008152,GO:0008509,GO:0008514,GO:0009987,GO:0010966,GO:0015075,GO:0015169,GO:0015291,GO:0015318,GO:0015605,GO:0015698,GO:0015711,GO:0015748,GO:0015794,GO:0016020,GO:…	ko:K14430	NA	CitMHS,Na_sulph_symp,SPX	OTHER	1	0	NA	NA	NA	NA	NA	NA
348772	By MS/MS	By MS/MS	NA	By MS/MS	By MS/MS	NA	2817400	3380600	0	6269900	2677900	0	0	0	0	0	0	0	82508.K1W4Q4	0	1499	COG0209@1|root,KOG1112@2759|Eukaryota,38B81@33154|Opisthokonta,3NWE4@4751|Fungi,3UYGV@5204|Basidiomycota,3VDCA@5234|Tremellales	4751|Fungi	F	Provides the precursors necessary for DNA synthesis. Catalyzes the biosynthesis of deoxyribonucleotides from the corresponding ribonucleotides	RNR1	GO:0000166,GO:0003674,GO:0003824,GO:0004550,GO:0004748,GO:0005488,GO:0005524,GO:0005575,GO:0005622,GO:0005623,GO:0005634,GO:0005737,GO:0005739,GO:0005829,GO:0005971,GO:0006139,GO:0006165,GO:0006213,GO:0006220,GO:0006221,GO:0006235,GO:0006240,GO:0006725,GO:0006753,GO:0006793,GO:0006796,GO:0006807,GO:0008144,GO:0008150,GO:0008152,GO:0009058,GO:0009116,GO:0009117,GO:0009119,GO:0009132,GO:0009133,GO:…	ko:K10807	ko00230,ko00240,ko00480,ko00983,ko01100,map00230,map00240,map00480,map00983,map01100	ATP-cone,Ribonuc_red_lgC,Ribonuc_red_lgN	OTHER	1	0	NA	NA	NA	NA	NA	NA
348949	NA	NA	By matching	By MS/MS	By MS/MS	NA	0	0	2532900	9877300	6351700	0	0	0	0	0	0	0	82508.K1W839	0	1260	KOG4155@1|root,KOG4155@2759|Eukaryota,38E37@33154|Opisthokonta,3NYYZ@4751|Fungi,3UZAH@5204|Basidiomycota,3VDUX@5234|Tremellales	4751|Fungi	S	WD40 repeats	NA	NA	NA	NA	WD40	OTHER	1	0	NA	NA	NA	NA	NA	NA
349017	NA	NA	NA	NA	By MS/MS	NA	0	0	0	0	4886700	0	0	0	0	0	0	0	5217.XP_007001600.1	6.51e-79	247	KOG1110@1|root,KOG1108@2759|Eukaryota,3AKD7@33154|Opisthokonta,3Q3SM@4751|Fungi,3V15A@5204|Basidiomycota,3VFD3@5234|Tremellales	4751|Fungi	S	Cytochrome b5-like Heme/Steroid binding domain	NA	NA	ko:K00287	ko00670,ko00790,ko01100,ko01523,map00670,map00790,map01100,map01523	Cyt-b5,FSH1	OTHER	1	0	NA	NA	NA	NA	NA	NA
349305	By MS/MS	By MS/MS	By MS/MS	By MS/MS	By MS/MS	By MS/MS	207490000	631820000	172760000	471520000	690670000	428820000	25439000	49330000	24633000	32461000	21691000	15468000	5207.AAW40983	0	945	COG2440@1|root,KOG2415@2759|Eukaryota,38H8R@33154|Opisthokonta,3NY0G@4751|Fungi,3V06S@5204|Basidiomycota,3VE3X@5234|Tremellales	4751|Fungi	C	Electron transfer flavoprotein-ubiquinone oxidoreductase, 4Fe-4S	NA	GO:0003674,GO:0003824,GO:0004174,GO:0005488,GO:0005575,GO:0005622,GO:0005623,GO:0005737,GO:0005739,GO:0005740,GO:0005743,GO:0005759,GO:0006091,GO:0006116,GO:0006139,GO:0006725,GO:0006732,GO:0006733,GO:0006734,GO:0006753,GO:0006793,GO:0006796,GO:0006807,GO:0008150,GO:0008152,GO:0009055,GO:0009117,GO:0009987,GO:0015980,GO:0016020,GO:0016021,GO:0016491,GO:0016645,GO:0016649,GO:0016722,GO:0017133,GO:…	ko:K00311	NA	ETF_QO,FAD_binding_2,NAD_binding_8	OTHER	1	0	NA	NA	NA	NA	NA	NA
349312	By MS/MS	By MS/MS	By MS/MS	By MS/MS	By MS/MS	By MS/MS	93501000	147310000	97268000	382540000	1001600000	1483700000	18694000	17034000	20172000	40507000	39265000	70882000	209285.XP_006691386.1	1.59e-255	707	COG0626@1|root,KOG0053@2759|Eukaryota,38F3Q@33154|Opisthokonta,3NVTU@4751|Fungi,3QPPV@4890|Ascomycota,215RI@147550|Sordariomycetes,3U745@5139|Sordariales,3HATE@35718|Chaetomiaceae	4751|Fungi	E	DegT/DnrJ/EryC1/StrS aminotransferase family	MET15	GO:0000096,GO:0000097,GO:0003674,GO:0003824,GO:0003961,GO:0004124,GO:0005575,GO:0005622,GO:0005623,GO:0005737,GO:0005886,GO:0006082,GO:0006520,GO:0006534,GO:0006535,GO:0006555,GO:0006563,GO:0006790,GO:0006807,GO:0008150,GO:0008152,GO:0008652,GO:0009058,GO:0009066,GO:0009067,GO:0009069,GO:0009070,GO:0009086,GO:0009987,GO:0016020,GO:0016053,GO:0016740,GO:0016765,GO:0017144,GO:0019344,GO:0019752,GO:…	ko:K17069	ko00270,ko00920,ko01100,ko01110,ko01120,ko01130,ko01200,ko01230,map00270,map00920,map01100,map01110,map01120,map01130,map01200,map01230	Cys_Met_Meta_PP	OTHER	1	0	NA	NA	NA	NA	NA	NA
349326	By MS/MS	By MS/MS	By MS/MS	By MS/MS	By MS/MS	By MS/MS	514060000	414530000	782220000	550890000	2258700000	1857800000	187250000	104340000	298150000	133340000	190550000	201650000	82508.K1WE74	2.6e-52	178	2CCT5@1|root,2S3DR@2759|Eukaryota,3A0WA@33154|Opisthokonta,3P1V1@4751|Fungi,3V88P@5204|Basidiomycota,3VH5S@5234|Tremellales	4751|Fungi	-	-	NA	NA	NA	NA	-	OTHER	1	4e-06	NA	NA	NA	NA	NA	NA
349410	By matching	By MS/MS	By MS/MS	By MS/MS	By MS/MS	By MS/MS	18994000	39079000	15586000	49093000	79583000	29798000	8907100	11879000	9518300	9849400	7439000	5059800	5141.EFNCRP00000004518	3.97e-173	489	KOG0759@1|root,KOG0759@2759|Eukaryota,38GP4@33154|Opisthokonta,3NWP1@4751|Fungi,3QMQN@4890|Ascomycota,211JV@147550|Sordariomycetes,3UCZ3@5139|Sordariales,3UNM2@5148|Sordariaceae	4751|Fungi	C	Belongs to the mitochondrial carrier (TC 2.A.29) family	NA	GO:0003674,GO:0005215,GO:0005310,GO:0005342,GO:0005575,GO:0005622,GO:0005623,GO:0005737,GO:0005739,GO:0005740,GO:0005743,GO:0006810,GO:0006811,GO:0006820,GO:0006835,GO:0006839,GO:0008150,GO:0008509,GO:0008514,GO:0015075,GO:0015140,GO:0015291,GO:0015297,GO:0015301,GO:0015318,GO:0015367,GO:0015556,GO:0015711,GO:0015740,GO:0015742,GO:0015743,GO:0015849,GO:0016020,GO:0016021,GO:0019866,GO:0022804,GO:…	ko:K15104	NA	Mito_carr	OTHER	0.999666	0.000346	NA	NA	NA	NA	NA	NA
349461	By MS/MS	By MS/MS	By MS/MS	By MS/MS	By MS/MS	By MS/MS	225340000	257390000	172810000	1234600000	9129800000	2308300000	84551000	47167000	65804000	209160000	607880000	185820000	5207.AAW41945	1.01e-68	209	COG0198@1|root,KOG3401@2759|Eukaryota,3A3EZ@33154|Opisthokonta,3P4CI@4751|Fungi,3V13Y@5204|Basidiomycota,3VFHY@5234|Tremellales	4751|Fungi	J	Ribosomal proteins L26 eukaryotic, L24P archaeal	RPL26A	GO:0002181,GO:0003674,GO:0003676,GO:0003723,GO:0003735,GO:0005198,GO:0005488,GO:0005575,GO:0005622,GO:0005623,GO:0005737,GO:0005829,GO:0005840,GO:0006412,GO:0006518,GO:0006807,GO:0008150,GO:0008152,GO:0009058,GO:0009059,GO:0009987,GO:0010467,GO:0015934,GO:0019538,GO:0022613,GO:0022625,GO:0022626,GO:0032991,GO:0034641,GO:0034645,GO:0042254,GO:0042273,GO:0043043,GO:0043170,GO:0043226,GO:0043228,GO:…	ko:K02898	ko03010,map03010	KOW,Ribosomal_L26	OTHER	1	0	NA	NA	NA	NA	NA	NA
349489	By MS/MS	By MS/MS	By MS/MS	By MS/MS	By MS/MS	By MS/MS	70431000	217880000	79945000	285920000	599680000	428910000	24191000	45835000	33032000	48635000	32192000	31831000	552467.XP_003197329.1	1.76e-231	642	COG1062@1|root,KOG0022@2759|Eukaryota,38BN7@33154|Opisthokonta,3NVMR@4751|Fungi,3UZTE@5204|Basidiomycota,3VEBM@5234|Tremellales	4751|Fungi	Q	Belongs to the zinc-containing alcohol dehydrogenase family. Class-III subfamily	NA	NA	ko:K00121	ko00010,ko00071,ko00350,ko00625,ko00626,ko00680,ko00830,ko00980,ko00982,ko01100,ko01110,ko01120,ko01130,ko01200,ko01220,ko05204,map00010,map00071,map00350,map00625,map00626,map00680,map00830,map00980,map00982,map01100,map01110,map01120,map01130,map01200,map01220,map05204	ADH_N,ADH_zinc_N	OTHER	1	0	NA	NA	NA	NA	NA	NA
349654	NA	By MS/MS	By MS/MS	By MS/MS	By MS/MS	By matching	0	9639900	0	3444700	15065000	6538100	0	0	0	0	0	0	82508.K1VSV4	0	931	COG0552@1|root,KOG0781@2759|Eukaryota,38EXV@33154|Opisthokonta,3NWSW@4751|Fungi,3UYHK@5204|Basidiomycota,3VDU0@5234|Tremellales	4751|Fungi	U	SRP54-type protein, GTPase domain	SRP101	GO:0000166,GO:0001882,GO:0001883,GO:0003674,GO:0003824,GO:0003924,GO:0005047,GO:0005488,GO:0005525,GO:0005575,GO:0005622,GO:0005623,GO:0005737,GO:0005783,GO:0005785,GO:0005789,GO:0005791,GO:0006605,GO:0006612,GO:0006613,GO:0006614,GO:0006810,GO:0006886,GO:0008104,GO:0008150,GO:0012505,GO:0015031,GO:0015833,GO:0016020,GO:0016462,GO:0016787,GO:0016817,GO:0016818,GO:0017076,GO:0017111,GO:0019001,GO:…	ko:K13431,ko:K21989	ko03060,map03060	SRP-alpha_N,SRP54,SRP54_N,SRX	OTHER	0.999225	0.000807	NA	NA	NA	NA	NA	NA
349933	By MS/MS	By MS/MS	By MS/MS	By MS/MS	By MS/MS	By MS/MS	20147000	158710000	37400000	73747000	140650000	81556000	14479000	29006000	28530000	10969000	14305000	10426000	5217.XP_007003018.1	2.62e-180	508	KOG0756@1|root,KOG0756@2759|Eukaryota,39H2P@33154|Opisthokonta,3NVPF@4751|Fungi,3UYDD@5204|Basidiomycota,3VCV9@5234|Tremellales	4751|Fungi	C	Belongs to the mitochondrial carrier (TC 2.A.29) family	SFC1	GO:0003674,GO:0005215,GO:0005310,GO:0005342,GO:0005469,GO:0005575,GO:0005622,GO:0005623,GO:0005737,GO:0005739,GO:0005740,GO:0005743,GO:0006810,GO:0006811,GO:0006820,GO:0006835,GO:0006839,GO:0006855,GO:0008150,GO:0008509,GO:0008514,GO:0015075,GO:0015138,GO:0015141,GO:0015238,GO:0015291,GO:0015297,GO:0015318,GO:0015556,GO:0015711,GO:0015740,GO:0015741,GO:0015744,GO:0015849,GO:0015893,GO:0016020,GO:…	ko:K15100	NA	Mito_carr	OTHER	1	1e-06	NA	NA	NA	NA	NA	NA
350065	NA	By MS/MS	By MS/MS	By MS/MS	By MS/MS	By MS/MS	0	16409000	3896400	28602000	63787000	51766000	0	4607900	0	9054300	5849700	8004300	84751.XP_007875726.1	5.83e-245	682	COG3508@1|root,KOG1417@2759|Eukaryota,38B92@33154|Opisthokonta,3NY70@4751|Fungi,3UYZ4@5204|Basidiomycota,3MYWP@452284|Ustilaginomycotina	4751|Fungi	E	homogentisate 1,2-dioxygenase	NA	GO:0003674,GO:0003824,GO:0004411,GO:0006082,GO:0006520,GO:0006558,GO:0006559,GO:0006725,GO:0006807,GO:0008150,GO:0008152,GO:0009056,GO:0009063,GO:0009072,GO:0009074,GO:0009987,GO:0016054,GO:0016491,GO:0016701,GO:0016702,GO:0017144,GO:0019439,GO:0019752,GO:0042737,GO:0043436,GO:0044237,GO:0044238,GO:0044248,GO:0044281,GO:0044282,GO:0046395,GO:0051213,GO:0055114,GO:0071704,GO:1901360,GO:1901361,GO:…	ko:K00451	ko00350,ko00643,ko01100,ko01120,map00350,map00643,map01100,map01120	HgmA	OTHER	1	9e-06	NA	NA	NA	NA	NA	NA
350113	By MS/MS	By MS/MS	By MS/MS	By MS/MS	By MS/MS	By MS/MS	17631000	38804000	16698000	43518000	133160000	131240000	7911200	6233400	8872300	7694700	7962600	10313000	82508.K1V1V2	2.23e-242	688	COG1574@1|root,2QSHE@2759|Eukaryota,390UK@33154|Opisthokonta,3NXIW@4751|Fungi,3UZCZ@5204|Basidiomycota,3VCTH@5234|Tremellales	4751|Fungi	G	Amidohydrolase family	NA	NA	NA	NA	Amidohydro_3	OTHER	0.999842	0.000157	NA	NA	NA	NA	NA	NA
350141	By MS/MS	By MS/MS	By MS/MS	By MS/MS	By MS/MS	By MS/MS	17496000	76374000	18702000	55182000	105040000	27686000	6070400	10638000	7106400	6810300	5680800	3731100	5217.XP_007001953.1	0	1451	COG0466@1|root,KOG2004@2759|Eukaryota,38CF0@33154|Opisthokonta,3NXAU@4751|Fungi,3UXZ3@5204|Basidiomycota,3VDRJ@5234|Tremellales	4751|Fungi	L	ATP-dependent serine protease that mediates the selective degradation of misfolded, unassembled or oxidatively damaged polypeptides as well as certain short-lived regulatory proteins in the mitochondrial matrix. May also have a chaperone function in the assembly of inner membrane protein complexes. Participates in the regulation of mitochondrial gene expression and in the maintenance of the integ…	PIM1	GO:0003674,GO:0003824,GO:0004176,GO:0005575,GO:0005622,GO:0005623,GO:0005737,GO:0005739,GO:0005759,GO:0006508,GO:0006515,GO:0006807,GO:0006996,GO:0007005,GO:0008150,GO:0008152,GO:0008233,GO:0009056,GO:0009057,GO:0009987,GO:0016043,GO:0016462,GO:0016787,GO:0016817,GO:0016818,GO:0016887,GO:0017111,GO:0019538,GO:0030163,GO:0031974,GO:0042623,GO:0043170,GO:0043226,GO:0043227,GO:0043229,GO:0043231,GO:…	ko:K08675	NA	AAA,LON_substr_bdg,Lon_C	OTHER	1	0	NA	NA	NA	NA	NA	NA
350422	NA	NA	NA	NA	By MS/MS	NA	0	0	0	0	6905300	0	0	0	0	0	0	0	82508.K1V263	1.79e-197	577	COG1718@1|root,KOG2270@2759|Eukaryota,38F6V@33154|Opisthokonta,3NVB9@4751|Fungi,3UZFR@5204|Basidiomycota,3VD9Z@5234|Tremellales	4751|Fungi	DT	Belongs to the protein kinase superfamily. RIO-type Ser Thr kinase family	rio1	GO:0000228,GO:0000462,GO:0000785,GO:0000790,GO:0003674,GO:0003824,GO:0004672,GO:0005575,GO:0005622,GO:0005623,GO:0005634,GO:0005694,GO:0005730,GO:0005737,GO:0006139,GO:0006364,GO:0006396,GO:0006464,GO:0006468,GO:0006725,GO:0006793,GO:0006796,GO:0006807,GO:0007088,GO:0007096,GO:0007346,GO:0008150,GO:0008152,GO:0009893,GO:0009987,GO:0010467,GO:0010468,GO:0010564,GO:0010604,GO:0010628,GO:0016070,GO:…	ko:K07178	ko03008,map03008	RIO1	OTHER	1	0	NA	NA	NA	NA	NA	NA
350426	By matching	By MS/MS	By matching	By MS/MS	By MS/MS	By matching	1679100	5843600	1634400	2297700	7248900	4197900	0	0	0	0	0	0	82508.K1VGM7	1.51e-209	602	COG0351@1|root,KOG2598@2759|Eukaryota,38DYW@33154|Opisthokonta,3NYCI@4751|Fungi,3UZ2H@5204|Basidiomycota,3VGH1@5234|Tremellales	4751|Fungi	HK	TENA/THI-4/PQQC family	THI20	GO:0003674,GO:0003824,GO:0005575,GO:0005622,GO:0005623,GO:0005737,GO:0005829,GO:0006725,GO:0006766,GO:0006767,GO:0006772,GO:0006790,GO:0006793,GO:0006796,GO:0006807,GO:0008150,GO:0008152,GO:0008902,GO:0008972,GO:0009056,GO:0009058,GO:0009110,GO:0009111,GO:0009228,GO:0009230,GO:0009987,GO:0016301,GO:0016310,GO:0016740,GO:0016772,GO:0016773,GO:0016776,GO:0016787,GO:0016810,GO:0017144,GO:0018130,GO:…	ko:K00877	ko00730,ko01100,map00730,map01100	Phos_pyr_kin,TENA_THI-4	OTHER	1	1e-06	NA	NA	NA	NA	NA	NA
350466	By MS/MS	By MS/MS	By MS/MS	By MS/MS	By MS/MS	By MS/MS	265870000	446390000	295330000	728640000	2446800000	1192800000	126120000	95472000	100610000	86072000	292900000	196630000	82508.K1VEM8	6.83e-76	228	COG1717@1|root,KOG0878@2759|Eukaryota,3A0DJ@33154|Opisthokonta,3P2W4@4751|Fungi,3V0V9@5204|Basidiomycota,3VFBS@5234|Tremellales	4751|Fungi	J	Ribosomal_L32e	RPL32	GO:0002181,GO:0003674,GO:0003735,GO:0005198,GO:0005575,GO:0005622,GO:0005623,GO:0005737,GO:0005829,GO:0005840,GO:0006412,GO:0006518,GO:0006807,GO:0008150,GO:0008152,GO:0009058,GO:0009059,GO:0009987,GO:0010467,GO:0015934,GO:0019538,GO:0022625,GO:0022626,GO:0032991,GO:0034641,GO:0034645,GO:0043043,GO:0043170,GO:0043226,GO:0043228,GO:0043229,GO:0043232,GO:0043603,GO:0043604,GO:0044237,GO:0044238,GO:…	ko:K02912	ko03010,map03010	Ribosomal_L32e	OTHER	1	0	NA	NA	NA	NA	NA	NA
350511	By MS/MS	By MS/MS	By MS/MS	By MS/MS	By MS/MS	By MS/MS	368560000	956080000	349270000	651840000	1544200000	1052200000	52665000	74440000	55040000	46321000	61301000	56533000	5217.XP_007000763.1	4.58e-299	827	COG2513@1|root,KOG1260@2759|Eukaryota,38CWA@33154|Opisthokonta,3NUMX@4751|Fungi,3UZ1A@5204|Basidiomycota,3VCX4@5234|Tremellales	4751|Fungi	C	Belongs to the isocitrate lyase PEP mutase superfamily. Isocitrate lyase family	ICL1	GO:0003674,GO:0003824,GO:0004451,GO:0005575,GO:0005622,GO:0005623,GO:0005737,GO:0005777,GO:0005782,GO:0005975,GO:0006081,GO:0006082,GO:0006083,GO:0006097,GO:0006629,GO:0006631,GO:0008150,GO:0008152,GO:0009056,GO:0009062,GO:0009987,GO:0015976,GO:0016042,GO:0016054,GO:0016829,GO:0016830,GO:0016833,GO:0016999,GO:0017001,GO:0017144,GO:0019752,GO:0031907,GO:0031974,GO:0032787,GO:0042579,GO:0043226,GO:…	ko:K01637	ko00630,ko01100,ko01110,ko01120,ko01200,map00630,map01100,map01110,map01120,map01200	ICL	OTHER	1	0	NA	NA	NA	NA	NA	NA
350694	By MS/MS	By MS/MS	By MS/MS	By MS/MS	By MS/MS	By MS/MS	12533000	14739000	11714000	68419000	89462000	96924000	7391000	5927300	6580300	9943000	12850000	13557000	5207.AAW47014	2.42e-75	228	COG0386@1|root,KOG1651@2759|Eukaryota,3A1XE@33154|Opisthokonta,3P24F@4751|Fungi,3V104@5204|Basidiomycota,3VF7H@5234|Tremellales	4751|Fungi	O	Glutathione peroxidase	GPX2	GO:0000302,GO:0003674,GO:0003824,GO:0004601,GO:0005575,GO:0005622,GO:0005623,GO:0005737,GO:0005739,GO:0005829,GO:0006950,GO:0006979,GO:0008150,GO:0008152,GO:0008379,GO:0009056,GO:0009636,GO:0009987,GO:0010035,GO:0016209,GO:0016491,GO:0016684,GO:0016999,GO:0017001,GO:0017144,GO:0019725,GO:0033554,GO:0034599,GO:0034614,GO:0035690,GO:0042221,GO:0042493,GO:0042542,GO:0042592,GO:0042737,GO:0042743,GO:…	ko:K00432	ko00480,ko00590,ko04918,map00480,map00590,map04918	GSHPx	OTHER	1	0	NA	NA	NA	NA	NA	NA
350767	By MS/MS	By MS/MS	By MS/MS	By matching	By MS/MS	By MS/MS	12025000	24210000	3628100	6467700	21456000	39917000	0	4714900	0	0	2875600	0	82508.K1VK27	0	1099	COG5167@1|root,KOG2395@2759|Eukaryota,38C12@33154|Opisthokonta,3NX2R@4751|Fungi,3UZ00@5204|Basidiomycota,3VER8@5234|Tremellales	4751|Fungi	U	VID27 cytoplasmic protein	vid27	GO:0005575,GO:0005622,GO:0005623,GO:0005737,GO:0044424,GO:0044464	ko:K15445	NA	VID27	OTHER	1	0	NA	NA	NA	NA	NA	NA
350790	By MS/MS	By MS/MS	By MS/MS	By MS/MS	By MS/MS	By MS/MS	6925900	24547000	6499000	37234000	49977000	35433000	3855300	5183400	0	12466000	5755500	6247200	5207.AAW45017	5.45e-150	426	COG0638@1|root,KOG0176@2759|Eukaryota,38CVS@33154|Opisthokonta,3NWYW@4751|Fungi,3UZV9@5204|Basidiomycota,3VDIA@5234|Tremellales	4751|Fungi	O	proteasome subunit	PUP2	GO:0000502,GO:0005575,GO:0005622,GO:0005623,GO:0005634,GO:0005737,GO:0005829,GO:0005839,GO:0006508,GO:0006511,GO:0006807,GO:0007088,GO:0007346,GO:0008150,GO:0008152,GO:0009056,GO:0009057,GO:0009896,GO:0009987,GO:0010498,GO:0010499,GO:0010564,GO:0010638,GO:0010965,GO:0012505,GO:0016020,GO:0019538,GO:0019773,GO:0019941,GO:0030071,GO:0030163,GO:0031331,GO:0031597,GO:0032270,GO:0032436,GO:0032991,GO:…	ko:K02729	ko03050,map03050	Proteasome,Proteasome_A_N	OTHER	1	0	NA	NA	NA	NA	NA	NA
350807	By MS/MS	By MS/MS	NA	By matching	By MS/MS	By MS/MS	2255800	4562600	0	1703200	5772800	6473900	0	0	0	0	0	0	82508.K1WIZ4	1.04e-185	529	KOG0032@1|root,KOG0032@2759|Eukaryota,38DCI@33154|Opisthokonta,3NVBD@4751|Fungi,3UXYP@5204|Basidiomycota,3VET5@5234|Tremellales	4751|Fungi	T	Belongs to the protein kinase superfamily	CMK2	GO:0000086,GO:0000278,GO:0003674,GO:0003824,GO:0004672,GO:0004674,GO:0004683,GO:0005488,GO:0005515,GO:0005516,GO:0005575,GO:0005622,GO:0005623,GO:0005737,GO:0005829,GO:0006464,GO:0006468,GO:0006793,GO:0006796,GO:0006807,GO:0006950,GO:0006979,GO:0007049,GO:0007154,GO:0007165,GO:0008150,GO:0008152,GO:0009987,GO:0016301,GO:0016310,GO:0016740,GO:0016772,GO:0016773,GO:0018105,GO:0018107,GO:0018193,GO:…	ko:K08794	ko04921,ko04925,map04921,map04925	Pkinase	OTHER	1	0	NA	NA	NA	NA	NA	NA
350958	By MS/MS	By MS/MS	By MS/MS	By MS/MS	By MS/MS	By MS/MS	297830000	590090000	261280000	621580000	1098600000	1099700000	123080000	146370000	116370000	160500000	124150000	146060000	82508.K1WQF2	1.25e-242	667	COG2159@1|root,KOG4245@2759|Eukaryota,38E5D@33154|Opisthokonta,3NX3K@4751|Fungi,3V0CU@5204|Basidiomycota	4751|Fungi	S	Amidohydrolase	NA	NA	ko:K14333	ko00362,ko00627,ko01120,map00362,map00627,map01120	Amidohydro_2	OTHER	1	0	NA	NA	NA	NA	NA	NA
351076	By MS/MS	By MS/MS	By MS/MS	By MS/MS	By MS/MS	By MS/MS	878840000	1491000000	848500000	4398100000	12795000000	18195000000	172140000	179960000	195210000	446220000	608000000	1111200000	5207.AAW42072	1.12e-276	761	COG0148@1|root,KOG2670@2759|Eukaryota,38C66@33154|Opisthokonta,3NXC1@4751|Fungi,3UXWY@5204|Basidiomycota,3VDYZ@5234|Tremellales	4751|Fungi	G	Enolase, N-terminal domain	ENO1	GO:0000015,GO:0000322,GO:0000323,GO:0000324,GO:0003674,GO:0003810,GO:0003824,GO:0004634,GO:0005488,GO:0005515,GO:0005575,GO:0005576,GO:0005618,GO:0005622,GO:0005623,GO:0005634,GO:0005737,GO:0005739,GO:0005773,GO:0005829,GO:0005886,GO:0005975,GO:0005996,GO:0006006,GO:0006007,GO:0006082,GO:0006090,GO:0006091,GO:0006094,GO:0006096,GO:0006139,GO:0006163,GO:0006164,GO:0006165,GO:0006725,GO:0006732,GO:…	ko:K01689	ko00010,ko00680,ko01100,ko01110,ko01120,ko01130,ko01200,ko01230,ko03018,ko04066,map00010,map00680,map01100,map01110,map01120,map01130,map01200,map01230,map03018,map04066	Enolase_C,Enolase_N	OTHER	1	0	NA	NA	NA	NA	NA	NA
351216	By MS/MS	By MS/MS	By MS/MS	By MS/MS	By MS/MS	By MS/MS	5690100	6838200	6580500	11774000	39427000	15621000	3578200	2483400	3828900	3336100	6000600	0	5207.AAW41041	1.78e-102	303	COG1390@1|root,KOG1664@2759|Eukaryota,38FW0@33154|Opisthokonta,3NXSD@4751|Fungi,3V0HK@5204|Basidiomycota,3VF5C@5234|Tremellales	4751|Fungi	C	ATP synthase (E/31 kDa) subunit	VMA4	GO:0000221,GO:0000322,GO:0000323,GO:0000324,GO:0000329,GO:0003674,GO:0003824,GO:0005215,GO:0005575,GO:0005622,GO:0005623,GO:0005737,GO:0005773,GO:0005774,GO:0006810,GO:0006811,GO:0006812,GO:0006873,GO:0006885,GO:0007035,GO:0008150,GO:0008324,GO:0009987,GO:0015075,GO:0015077,GO:0015078,GO:0015318,GO:0015399,GO:0015405,GO:0015672,GO:0015988,GO:0015991,GO:0016020,GO:0016021,GO:0016462,GO:0016469,GO:…	ko:K02150	ko00190,ko01100,ko04145,ko04150,ko04721,ko04966,ko05110,ko05120,ko05323,map00190,map01100,map04145,map04150,map04721,map04966,map05110,map05120,map05323	vATP-synt_E	OTHER	1	0	NA	NA	NA	NA	NA	NA
351263	NA	By MS/MS	NA	NA	NA	NA	0	0	0	0	0	0	0	0	0	0	0	0	82508.K1W5U2	0	1059	2C0PY@1|root,2RB8W@2759|Eukaryota,3AXQ9@33154|Opisthokonta,3PIVD@4751|Fungi,3V82R@5204|Basidiomycota,3VG60@5234|Tremellales	4751|Fungi	-	-	NA	NA	NA	NA	Zn_clus	OTHER	1	0	NA	NA	NA	NA	NA	NA
351322	NA	By MS/MS	NA	By MS/MS	By matching	NA	0	559240	0	640760	658290	0	0	0	0	0	0	0	82508.K1VK96	0	2496	COG5032@1|root,KOG0902@2759|Eukaryota,38C4G@33154|Opisthokonta,3NUX7@4751|Fungi,3UYVB@5204|Basidiomycota,3VD2Y@5234|Tremellales	4751|Fungi	T	Phosphoinositide 3-kinase family, accessory domain (PIK domain)	STT4	GO:0000278,GO:0000281,GO:0000422,GO:0000910,GO:0003674,GO:0003824,GO:0004430,GO:0005575,GO:0005622,GO:0005623,GO:0005737,GO:0005739,GO:0005886,GO:0006629,GO:0006644,GO:0006646,GO:0006650,GO:0006793,GO:0006796,GO:0006914,GO:0006996,GO:0007005,GO:0007010,GO:0007016,GO:0007049,GO:0007154,GO:0007165,GO:0008104,GO:0008150,GO:0008152,GO:0008610,GO:0008654,GO:0009056,GO:0009058,GO:0009987,GO:0016020,GO:…	ko:K00888	ko00562,ko01100,ko04011,ko04070,map00562,map01100,map04011,map04070	PI3Ka,PI3_PI4_kinase	OTHER	1	0	NA	NA	NA	NA	NA	NA
351366	By MS/MS	By MS/MS	By MS/MS	By MS/MS	By MS/MS	By MS/MS	29883000	18370000	35818000	40921000	226090000	349090000	19980000	7947000	21001000	14097000	17180000	41372000	82508.K1V5Y9	4.66e-232	667	KOG1325@1|root,KOG1325@2759|Eukaryota,38GBY@33154|Opisthokonta,3NUWK@4751|Fungi,3UYSM@5204|Basidiomycota,3VCY4@5234|Tremellales	4751|Fungi	G	Cytoplasmic phospholipase A2, catalytic subunit	NA	NA	ko:K13333	ko00564,map00564	PLA2_B	SP	0.000201	0.999794	CS pos: 18-19. Pr: 0.9787	NA	NA	NA	NA	NA
351448	By MS/MS	By MS/MS	By MS/MS	By MS/MS	By MS/MS	By matching	39373000	20988000	12489000	29473000	39101000	11585000	22831000	4585700	0	7276900	3038100	0	82508.K1V4B9	4.29e-160	463	COG5347@1|root,KOG0704@2759|Eukaryota,38GP3@33154|Opisthokonta,3NTWJ@4751|Fungi,3V0DK@5204|Basidiomycota,3VE86@5234|Tremellales	4751|Fungi	TUZ	ARF GTPase activator	GCS1	GO:0000003,GO:0003006,GO:0003674,GO:0003779,GO:0005096,GO:0005488,GO:0005515,GO:0005575,GO:0005622,GO:0005623,GO:0005737,GO:0005768,GO:0005793,GO:0005794,GO:0005802,GO:0005829,GO:0005856,GO:0006810,GO:0006888,GO:0006890,GO:0006892,GO:0006893,GO:0006996,GO:0007010,GO:0007015,GO:0007049,GO:0008047,GO:0008092,GO:0008104,GO:0008150,GO:0009653,GO:0009987,GO:0012505,GO:0015031,GO:0015833,GO:0016043,GO:…	ko:K12492	ko04144,map04144	ArfGap	OTHER	1	0	NA	NA	NA	NA	NA	NA
351604	By matching	By MS/MS	By MS/MS	By MS/MS	NA	NA	4684100	5992700	3328600	19374000	0	0	0	0	0	0	0	0	5217.XP_007002419.1	5.5e-48	159	COG1965@1|root,KOG3413@2759|Eukaryota,3A3XZ@33154|Opisthokonta,3P5HA@4751|Fungi,3V2AG@5204|Basidiomycota,3VG1G@5234|Tremellales	4751|Fungi	P	Frataxin-like domain	YFH1	GO:0003674,GO:0003824,GO:0004322,GO:0005488,GO:0005506,GO:0005575,GO:0005622,GO:0005623,GO:0005737,GO:0005739,GO:0005759,GO:0006464,GO:0006518,GO:0006575,GO:0006725,GO:0006749,GO:0006778,GO:0006779,GO:0006783,GO:0006790,GO:0006807,GO:0006873,GO:0006875,GO:0006879,GO:0006950,GO:0006979,GO:0006996,GO:0007005,GO:0008150,GO:0008152,GO:0008198,GO:0008199,GO:0009058,GO:0009987,GO:0016043,GO:0016226,GO:…	ko:K19054	ko00860,map00860	Frataxin_Cyay	OTHER	1	0	NA	NA	NA	NA	NA	NA
351624	By MS/MS	By MS/MS	NA	NA	NA	NA	1123500	2853800	0	0	0	0	0	0	0	0	0	0	5207.AAW41996	3.76e-128	375	KOG2603@1|root,KOG2603@2759|Eukaryota,38DJE@33154|Opisthokonta,3NWTE@4751|Fungi,3V0DE@5204|Basidiomycota,3VCX7@5234|Tremellales	4751|Fungi	O	Dolichyl-diphosphooligosaccharide-protein glycotransferase	OST3	GO:0003674,GO:0003824,GO:0004576,GO:0004579,GO:0005575,GO:0005622,GO:0005623,GO:0005737,GO:0005783,GO:0005789,GO:0006464,GO:0006486,GO:0006487,GO:0006493,GO:0006807,GO:0008150,GO:0008152,GO:0008250,GO:0009058,GO:0009059,GO:0009100,GO:0009101,GO:0009987,GO:0012505,GO:0016020,GO:0016021,GO:0016740,GO:0016757,GO:0016758,GO:0018193,GO:0018196,GO:0018279,GO:0019538,GO:0031224,GO:0031984,GO:0032991,GO:…	ko:K12669	ko00510,ko00513,ko01100,ko04141,map00510,map00513,map01100,map04141	OST3_OST6	SP	0.003439	0.99653	CS pos: 26-27. Pr: 0.4057	NA	NA	NA	NA	NA
351644	NA	By matching	NA	NA	By MS/MS	NA	0	8330400	0	0	13310000	0	0	0	0	0	0	0	710243.XP_007601352.1	1.05e-128	375	COG0846@1|root,KOG2684@2759|Eukaryota,38EG6@33154|Opisthokonta,3NWJS@4751|Fungi,3QMEG@4890|Ascomycota,2128R@147550|Sordariomycetes,1EZAB@1028384|Glomerellales	4751|Fungi	BK	Sir2 family	NA	NA	NA	NA	SIR2	OTHER	0.859046	0.140943	NA	NA	NA	NA	NA	NA
351732	NA	By MS/MS	NA	By matching	By matching	By matching	0	8391900	0	1415600	7517700	3590600	0	0	0	0	0	0	82508.K1VIC4	0	1384	COG5657@1|root,KOG2274@2759|Eukaryota,38BE2@33154|Opisthokonta,3NYWN@4751|Fungi,3UYJB@5204|Basidiomycota,3VE9V@5234|Tremellales	4751|Fungi	UY	arm repeat-containing protein	NA	GO:0000166,GO:0001882,GO:0001883,GO:0003674,GO:0005215,GO:0005488,GO:0005525,GO:0005575,GO:0005622,GO:0005623,GO:0005634,GO:0005635,GO:0005643,GO:0005737,GO:0005829,GO:0006606,GO:0006810,GO:0006886,GO:0006913,GO:0008104,GO:0008150,GO:0008565,GO:0012505,GO:0015031,GO:0015833,GO:0016020,GO:0016021,GO:0017038,GO:0017076,GO:0019001,GO:0031224,GO:0031967,GO:0031975,GO:0032549,GO:0032550,GO:0032553,GO:…	ko:K20224	NA	IBN_N	OTHER	1	0	NA	NA	NA	NA	NA	NA
351786	By MS/MS	By MS/MS	By MS/MS	By MS/MS	By MS/MS	By matching	23996000	64014000	31023000	68839000	86841000	35114000	8884100	16269000	15436000	14542000	9872200	3821800	5207.AAW44294	3.21e-17	81.3	KOG1003@1|root,KOG1003@2759|Eukaryota,3A1H2@33154|Opisthokonta,3P2Z3@4751|Fungi,3V1IE@5204|Basidiomycota,3VFBN@5234|Tremellales	4751|Fungi	Z	Tropomyosin like	TPM2	GO:0000001,GO:0000003,GO:0000011,GO:0000142,GO:0000278,GO:0000281,GO:0000746,GO:0000747,GO:0000755,GO:0000910,GO:0000912,GO:0000915,GO:0000916,GO:0003674,GO:0003779,GO:0003786,GO:0005488,GO:0005515,GO:0005575,GO:0005622,GO:0005623,GO:0005737,GO:0005826,GO:0005856,GO:0005884,GO:0005933,GO:0005935,GO:0005937,GO:0005938,GO:0006403,GO:0006810,GO:0006887,GO:0006996,GO:0007005,GO:0007010,GO:0007015,GO:…	ko:K17945	NA	Tropomyosin_1	OTHER	1	1e-06	NA	NA	NA	NA	NA	NA
351809	By MS/MS	By MS/MS	By MS/MS	By MS/MS	By MS/MS	By MS/MS	11576000	32222000	14144000	24315000	37270000	15408000	0	14006000	9861100	9943400	6716400	0	82508.K1VZ55	1.15e-226	626	KOG0668@1|root,KOG0668@2759|Eukaryota,38B6E@33154|Opisthokonta,3NWKT@4751|Fungi,3UYUY@5204|Basidiomycota,3VDW9@5234|Tremellales	4751|Fungi	DKT	Phosphotransferase enzyme family	CKA1	GO:0000003,GO:0000122,GO:0000166,GO:0000228,GO:0000785,GO:0000790,GO:0003006,GO:0003674,GO:0003824,GO:0004672,GO:0004674,GO:0005488,GO:0005524,GO:0005575,GO:0005622,GO:0005623,GO:0005634,GO:0005694,GO:0005730,GO:0005956,GO:0006355,GO:0006356,GO:0006357,GO:0006359,GO:0006464,GO:0006468,GO:0006793,GO:0006796,GO:0006807,GO:0006950,GO:0006974,GO:0007163,GO:0007530,GO:0007531,GO:0007533,GO:0007535,GO:…	ko:K03097	ko03008,ko04064,ko04137,ko04139,ko04310,ko04520,ko04712,ko05162,ko05168,ko05169,map03008,map04064,map04137,map04139,map04310,map04520,map04712,map05162,map05168,map05169	Pkinase	OTHER	1	0	NA	NA	NA	NA	NA	NA
351984	By MS/MS	By MS/MS	By matching	By MS/MS	By matching	By matching	6613900	23709000	4521900	30484000	35348000	17879000	3112100	4491600	0	5626200	3432500	3080400	82508.K1W1E5	0	1034	COG0365@1|root,KOG1175@2759|Eukaryota,38DH9@33154|Opisthokonta,3NU7T@4751|Fungi,3UY66@5204|Basidiomycota,3VE8A@5234|Tremellales	4751|Fungi	I	AMP-binding enzyme	NA	NA	ko:K01907	ko00280,ko00650,map00280,map00650	ACAS_N,AMP-binding,AMP-binding_C	OTHER	0.999709	0.000293	NA	NA	NA	NA	NA	NA
352061	NA	By MS/MS	NA	By matching	By MS/MS	By matching	0	8692900	0	2510600	21092000	5327200	0	2430600	0	0	1757600	0	82508.K1VEW3	2.1e-110	336	COG0223@1|root,KOG3082@2759|Eukaryota,38GNB@33154|Opisthokonta,3P3MU@4751|Fungi,3V18X@5204|Basidiomycota,3VF3D@5234|Tremellales	4751|Fungi	J	Formyl transferase, C-terminal domain	FMT1	GO:0003674,GO:0003824,GO:0004479,GO:0005575,GO:0005622,GO:0005623,GO:0005737,GO:0005739,GO:0006139,GO:0006396,GO:0006399,GO:0006400,GO:0006412,GO:0006413,GO:0006464,GO:0006518,GO:0006725,GO:0006807,GO:0008033,GO:0008150,GO:0008152,GO:0009058,GO:0009059,GO:0009451,GO:0009987,GO:0010467,GO:0016070,GO:0016740,GO:0016741,GO:0016742,GO:0019538,GO:0019988,GO:0032543,GO:0034470,GO:0034641,GO:0034645,GO:…	ko:K00604	ko00670,ko00970,map00670,map00970	Formyl_trans_C,Formyl_trans_N	OTHER	1	1e-06	NA	NA	NA	NA	NA	NA
352093	By MS/MS	By MS/MS	By MS/MS	By MS/MS	By MS/MS	By MS/MS	85535000	202290000	61742000	150480000	305070000	143250000	18167000	27863000	15102000	26239000	16348000	11843000	82508.K1WC72	1.99e-176	509	COG0119@1|root,KOG2368@2759|Eukaryota,38D16@33154|Opisthokonta,3NVNW@4751|Fungi,3V06B@5204|Basidiomycota,3VCZW@5234|Tremellales	4751|Fungi	CE	HMGL-like	NA	NA	ko:K01640	ko00072,ko00280,ko00281,ko00650,ko01100,ko04146,map00072,map00280,map00281,map00650,map01100,map04146	HMGL-like	OTHER	1	0	NA	NA	NA	NA	NA	NA
352103	NA	By MS/MS	By matching	By matching	NA	By matching	0	13277000	3405000	4357700	0	13108000	0	0	0	0	0	0	82508.K1VPK5	5.08e-212	604	COG5029@1|root,KOG0365@2759|Eukaryota,38CYN@33154|Opisthokonta,3NU8I@4751|Fungi,3UY94@5204|Basidiomycota,3VE4B@5234|Tremellales	4751|Fungi	O	Prenyltransferase and squalene oxidase repeat	RAM1	GO:0003674,GO:0003824,GO:0004659,GO:0004660,GO:0005488,GO:0005575,GO:0005622,GO:0005623,GO:0005737,GO:0005965,GO:0006464,GO:0006807,GO:0008104,GO:0008150,GO:0008152,GO:0008270,GO:0008318,GO:0009987,GO:0016740,GO:0016765,GO:0018342,GO:0018343,GO:0019538,GO:0032991,GO:0033036,GO:0034613,GO:0036211,GO:0043167,GO:0043169,GO:0043170,GO:0043412,GO:0044237,GO:0044238,GO:0044260,GO:0044267,GO:0044424,GO:…	ko:K05954	ko00900,ko01130,map00900,map01130	Prenyltrans	OTHER	1	0	NA	NA	NA	NA	NA	NA
352197	By matching	By MS/MS	NA	By MS/MS	By matching	By matching	1503300	13358000	0	8184400	7494000	10128000	0	0	0	0	0	0	82508.K1VM36	2.78e-150	434	COG0388@1|root,KOG0805@2759|Eukaryota,39RP6@33154|Opisthokonta,3NWGQ@4751|Fungi,3V0KE@5204|Basidiomycota	4751|Fungi	E	carbon-nitrogen hydrolase	NIT1	GO:0000257,GO:0000422,GO:0003674,GO:0003824,GO:0006914,GO:0006996,GO:0007005,GO:0008150,GO:0008152,GO:0009056,GO:0009987,GO:0016043,GO:0016236,GO:0016787,GO:0016810,GO:0016815,GO:0022411,GO:0044237,GO:0044248,GO:0061726,GO:0061919,GO:0071840,GO:1903008	ko:K01501,ko:K13035	ko00380,ko00460,ko00627,ko00643,ko00910,ko01100,ko01110,ko01120,map00380,map00460,map00627,map00643,map00910,map01100,map01110,map01120	CN_hydrolase	OTHER	1	1.2e-05	NA	NA	NA	NA	NA	NA
352314	By MS/MS	By MS/MS	By MS/MS	By MS/MS	By MS/MS	By MS/MS	16720000	47982000	12804000	36970000	140420000	216420000	6810300	7468500	5965800	9013300	8952200	15223000	5207.AAW40882	1.38e-113	339	COG5580@1|root,KOG2936@2759|Eukaryota,39P2Y@33154|Opisthokonta,3NVRU@4751|Fungi,3V0K0@5204|Basidiomycota,3VFJC@5234|Tremellales	4751|Fungi	O	Chaperone activator	AHA1	GO:0001671,GO:0003674,GO:0005488,GO:0005515,GO:0005575,GO:0005622,GO:0005623,GO:0005737,GO:0006457,GO:0006950,GO:0008047,GO:0008150,GO:0009266,GO:0009408,GO:0009628,GO:0009987,GO:0030234,GO:0032781,GO:0033554,GO:0034605,GO:0043085,GO:0043462,GO:0044093,GO:0044424,GO:0044464,GO:0050790,GO:0050896,GO:0051087,GO:0051336,GO:0051345,GO:0051716,GO:0060589,GO:0060590,GO:0065007,GO:0065009,GO:0098772	NA	NA	AHSA1,Aha1_N	OTHER	0.99933	0.000677	NA	NA	NA	NA	NA	NA
352381	NA	By MS/MS	By matching	By MS/MS	By MS/MS	By MS/MS	0	15549000	2602600	24390000	62209000	61975000	0	6913200	0	7620800	5573900	6651700	5207.AAW46107	1.79e-138	469	KOG0998@1|root,KOG0998@2759|Eukaryota,38GSU@33154|Opisthokonta,3NY8Z@4751|Fungi,3UY2S@5204|Basidiomycota,3VGFY@5234|Tremellales	4751|Fungi	TU	Endocytosis-related protein	NA	GO:0003674,GO:0005488,GO:0005515,GO:0005575,GO:0005622,GO:0005623,GO:0005737,GO:0005856,GO:0005933,GO:0005934,GO:0005935,GO:0005937,GO:0005938,GO:0006810,GO:0006897,GO:0006950,GO:0006986,GO:0007154,GO:0007165,GO:0008150,GO:0009987,GO:0010033,GO:0010564,GO:0015629,GO:0016043,GO:0016192,GO:0023052,GO:0030427,GO:0030479,GO:0030863,GO:0030864,GO:0030968,GO:0032182,GO:0032465,GO:0032467,GO:0032879,GO:…	ko:K12472	ko04144,map04144	EF-hand_4,UBA	OTHER	1	1e-06	NA	NA	NA	NA	NA	NA
352469	By matching	By MS/MS	NA	NA	By MS/MS	NA	1173300	2272400	0	0	13192000	0	0	0	0	0	0	0	5217.XP_007006736.1	2.27e-297	838	COG0659@1|root,KOG0236@2759|Eukaryota,38EAT@33154|Opisthokonta,3NW17@4751|Fungi,3V044@5204|Basidiomycota,3VEM8@5234|Tremellales	4751|Fungi	P	Sulfate permease family	NA	GO:0003674,GO:0005215,GO:0005216,GO:0005253,GO:0005254,GO:0005310,GO:0005342,GO:0005575,GO:0005622,GO:0005623,GO:0005737,GO:0005783,GO:0005886,GO:0005887,GO:0006810,GO:0006811,GO:0006820,GO:0006821,GO:0006835,GO:0006873,GO:0006885,GO:0008150,GO:0008272,GO:0008509,GO:0008514,GO:0009987,GO:0012505,GO:0015075,GO:0015103,GO:0015106,GO:0015108,GO:0015116,GO:0015267,GO:0015291,GO:0015297,GO:0015301,GO:…	NA	NA	STAS,Sulfate_transp	OTHER	1	0	NA	NA	NA	NA	NA	NA
352536	By MS/MS	By MS/MS	By MS/MS	By MS/MS	By MS/MS	By MS/MS	681040000	433860000	536200000	1057800000	3941900000	5320400000	123170000	54622000	115240000	113950000	188550000	358930000	5207.AAW46800	8.62e-224	658	COG2303@1|root,KOG1238@2759|Eukaryota,38UEK@33154|Opisthokonta,3NUFD@4751|Fungi,3UYTX@5204|Basidiomycota,3VE50@5234|Tremellales	4751|Fungi	E	Belongs to the GMC oxidoreductase family	NA	NA	NA	NA	GMC_oxred_C,GMC_oxred_N	SP	0.006052	0.993917	CS pos: 19-20. Pr: 0.9382	AA	AA3	AA3_2	AA3:6.5	NA
352570	By MS/MS	By MS/MS	By MS/MS	By MS/MS	By MS/MS	By MS/MS	23198000	53477000	20526000	42185000	66126000	44122000	7401600	8675600	9292000	6614200	3388900	3754700	82508.K1VKK8	0	1889	COG5101@1|root,KOG2020@2759|Eukaryota,38D8Y@33154|Opisthokonta,3NX17@4751|Fungi,3V04Q@5204|Basidiomycota,3VD0W@5234|Tremellales	4751|Fungi	UY	CRM1 C terminal	CRM1	GO:0000054,GO:0000055,GO:0000056,GO:0000166,GO:0000775,GO:0000776,GO:0001882,GO:0001883,GO:0003674,GO:0005049,GO:0005215,GO:0005488,GO:0005525,GO:0005575,GO:0005622,GO:0005623,GO:0005634,GO:0005635,GO:0005643,GO:0005694,GO:0005737,GO:0005815,GO:0005816,GO:0005856,GO:0006403,GO:0006405,GO:0006406,GO:0006611,GO:0006810,GO:0006886,GO:0006913,GO:0006950,GO:0006979,GO:0008104,GO:0008150,GO:0008152,GO:…	ko:K14290	ko03008,ko03013,ko04013,ko05164,ko05166,ko05169,map03008,map03013,map04013,map05164,map05166,map05169	CRM1_C,IBN_N,Xpo1	OTHER	0.999888	0.000139	NA	NA	NA	NA	NA	NA
352670	By matching	By MS/MS	By MS/MS	By MS/MS	By MS/MS	By MS/MS	9500600	35179000	9499500	13826000	29676000	10735000	4750500	8186700	3550400	5162600	3737800	4503500	82508.K1VSC3	1.95e-141	418	KOG2754@1|root,KOG2754@2759|Eukaryota,38ERA@33154|Opisthokonta,3NWIM@4751|Fungi,3V0EZ@5204|Basidiomycota,3VDWW@5234|Tremellales	4751|Fungi	G	Essential subunit of the N-oligosaccharyl transferase (OST) complex which catalyzes the transfer of a high mannose oligosaccharide from a lipid-linked oligosaccharide donor to an asparagine residue within an Asn-X-Ser Thr consensus motif in nascent polypeptide chains	WBP1	GO:0005575,GO:0005622,GO:0005623,GO:0005634,GO:0005635,GO:0005737,GO:0005783,GO:0005789,GO:0006464,GO:0006486,GO:0006487,GO:0006807,GO:0008150,GO:0008152,GO:0008250,GO:0009058,GO:0009059,GO:0009100,GO:0009101,GO:0009987,GO:0012505,GO:0016020,GO:0019538,GO:0031967,GO:0031975,GO:0031984,GO:0032991,GO:0034645,GO:0036211,GO:0042175,GO:0043170,GO:0043226,GO:0043227,GO:0043229,GO:0043231,GO:0043412,GO:…	ko:K12670	ko00510,ko00513,ko01100,ko04141,map00510,map00513,map01100,map04141	DDOST_48kD	SP	0.000489	0.999484	CS pos: 22-23. Pr: 0.9674	NA	NA	NA	NA	NA
352695	NA	By MS/MS	NA	NA	NA	NA	0	4690500	0	0	0	0	0	0	0	0	0	0	82508.K1VQH1	0	1639	COG5099@1|root,KOG4574@2759|Eukaryota,399Q8@33154|Opisthokonta,3NVAJ@4751|Fungi,3UZIW@5204|Basidiomycota,3VETM@5234|Tremellales	4751|Fungi	A	Pumilio-like repeats	NA	GO:0000288,GO:0000956,GO:0003674,GO:0003676,GO:0003723,GO:0003729,GO:0005488,GO:0006139,GO:0006401,GO:0006402,GO:0006725,GO:0006807,GO:0008150,GO:0008152,GO:0009056,GO:0009057,GO:0009892,GO:0009987,GO:0010468,GO:0010605,GO:0010629,GO:0016070,GO:0016071,GO:0019222,GO:0019439,GO:0034641,GO:0034655,GO:0043170,GO:0044237,GO:0044238,GO:0044248,GO:0044260,GO:0044265,GO:0044270,GO:0046483,GO:0046700,GO:…	ko:K17974	NA	PUF,RRM_1	OTHER	1	0	NA	NA	NA	NA	NA	NA
352757	By MS/MS	By MS/MS	By MS/MS	By MS/MS	By MS/MS	By MS/MS	234650000	665650000	241290000	604620000	1131600000	722450000	60278000	86609000	69285000	66266000	60332000	44805000	82508.K1WJA5	4.36e-229	637	COG0115@1|root,KOG0975@2759|Eukaryota,38GTA@33154|Opisthokonta,3NVAG@4751|Fungi,3UZ23@5204|Basidiomycota,3VD3A@5234|Tremellales	4751|Fungi	E	Amino-transferase class IV	BAT2	GO:0003674,GO:0003824,GO:0004084,GO:0005488,GO:0005575,GO:0005622,GO:0005623,GO:0005634,GO:0005737,GO:0005739,GO:0005759,GO:0006082,GO:0006520,GO:0006549,GO:0006551,GO:0006573,GO:0006807,GO:0008144,GO:0008150,GO:0008152,GO:0008483,GO:0008652,GO:0009056,GO:0009058,GO:0009063,GO:0009081,GO:0009082,GO:0009083,GO:0009097,GO:0009098,GO:0009099,GO:0009987,GO:0016053,GO:0016054,GO:0016740,GO:0016769,GO:…	ko:K00826	ko00270,ko00280,ko00290,ko00770,ko01100,ko01110,ko01130,ko01210,ko01230,map00270,map00280,map00290,map00770,map01100,map01110,map01130,map01210,map01230	Aminotran_4	OTHER	1	0	NA	NA	NA	NA	NA	NA
352769	By matching	NA	By matching	By matching	By MS/MS	By MS/MS	2067100	0	2154500	3983400	6651900	2864200	0	0	0	0	0	0	82508.K1WJT1	0	1120	COG5647@1|root,KOG2166@2759|Eukaryota,38E6P@33154|Opisthokonta,3NVFD@4751|Fungi,3UXXN@5204|Basidiomycota,3VDAE@5234|Tremellales	4751|Fungi	O	Cullin	CDC53	GO:0000082,GO:0000086,GO:0000151,GO:0000152,GO:0000278,GO:0003674,GO:0003676,GO:0003677,GO:0003688,GO:0003690,GO:0005488,GO:0005515,GO:0005575,GO:0005622,GO:0005623,GO:0005634,GO:0006275,GO:0006508,GO:0006511,GO:0006807,GO:0007049,GO:0007346,GO:0008150,GO:0008152,GO:0008156,GO:0009056,GO:0009057,GO:0009889,GO:0009890,GO:0009892,GO:0009987,GO:0010498,GO:0010556,GO:0010558,GO:0010564,GO:0010605,GO:…	ko:K03347	ko04110,ko04111,ko04114,ko04120,ko04141,ko04310,ko04340,ko04341,ko04350,ko04710,ko05168,ko05200,map04110,map04111,map04114,map04120,map04141,map04310,map04340,map04341,map04350,map04710,map05168,map05200	Cullin,Cullin_Nedd8	OTHER	0.999882	9.9e-05	NA	NA	NA	NA	NA	NA
352777	NA	NA	NA	By MS/MS	By MS/MS	By MS/MS	0	0	0	5068400	26160000	5302000	0	0	0	0	0	0	82508.K1VCE8	4.83e-213	610	COG1409@1|root,KOG1378@2759|Eukaryota,38RDT@33154|Opisthokonta,3NY25@4751|Fungi,3V06D@5204|Basidiomycota	4751|Fungi	G	Iron/zinc purple acid phosphatase-like protein C	NA	NA	ko:K22390	NA	Metallophos,Metallophos_C,Pur_ac_phosph_N	SP	0.000203	0.999798	CS pos: 22-23. Pr: 0.9789	NA	NA	NA	NA	NA
352804	NA	NA	NA	By MS/MS	By MS/MS	By matching	0	0	0	4116400	3679200	3754300	0	0	0	0	0	0	82508.K1WKC4	0	1412	KOG0308@1|root,KOG0308@2759|Eukaryota,38H09@33154|Opisthokonta,3NV5F@4751|Fungi,3UYDX@5204|Basidiomycota,3VCWJ@5234|Tremellales	4751|Fungi	S	Domain of unknown function (DUF3337)	NA	GO:0003674,GO:0005488,GO:0005515,GO:0005575,GO:0005622,GO:0005623,GO:0005737,GO:0006464,GO:0006807,GO:0008150,GO:0008152,GO:0009987,GO:0019538,GO:0030428,GO:0032182,GO:0032991,GO:0036211,GO:0043130,GO:0043170,GO:0043412,GO:0044237,GO:0044238,GO:0044260,GO:0044267,GO:0044424,GO:0044464,GO:0051286,GO:0070647,GO:0071704,GO:1901564	ko:K15361	ko03460,map03460	DUF3337,WD40	OTHER	1	1.1e-05	NA	NA	NA	NA	NA	NA
352877	NA	By MS/MS	By MS/MS	NA	By MS/MS	NA	0	10369000	0	0	0	0	0	0	0	0	0	0	5341.XP_007327498.1	2.15e-177	503	COG2070@1|root,2QTWN@2759|Eukaryota,397Z1@33154|Opisthokonta,3NWW5@4751|Fungi,3V06Y@5204|Basidiomycota,226I2@155619|Agaricomycetes,3W4JF@5338|Agaricales	4751|Fungi	E	Nitronate monooxygenase	NA	NA	NA	NA	NMO	OTHER	1	0	NA	NA	NA	NA	NA	NA
352946	By MS/MS	By MS/MS	By MS/MS	By MS/MS	By MS/MS	By MS/MS	13293000	33735000	6315300	24977000	60782000	43205000	5389600	7422700	5197000	5964600	4310600	3454900	5207.AAW44226	2.96e-184	523	COG0276@1|root,KOG1321@2759|Eukaryota,38BPY@33154|Opisthokonta,3NUJ0@4751|Fungi,3UZMC@5204|Basidiomycota,3VDI9@5234|Tremellales	4751|Fungi	H	Ferrochelatase	HEM15	GO:0003674,GO:0003824,GO:0004325,GO:0005488,GO:0005575,GO:0005622,GO:0005623,GO:0005737,GO:0005739,GO:0005740,GO:0005743,GO:0006725,GO:0006778,GO:0006779,GO:0006783,GO:0006807,GO:0008150,GO:0008152,GO:0009058,GO:0009987,GO:0016020,GO:0016829,GO:0018130,GO:0019438,GO:0019866,GO:0031090,GO:0031966,GO:0031967,GO:0031975,GO:0033013,GO:0033014,GO:0034641,GO:0042168,GO:0042440,GO:0043226,GO:0043227,GO:…	ko:K01772	ko00860,ko01100,ko01110,map00860,map01100,map01110	Ferrochelatase	OTHER	1	0	NA	NA	NA	NA	NA	NA
352988	By MS/MS	By MS/MS	By matching	By MS/MS	By MS/MS	By MS/MS	5044800	31110000	4493600	12320000	65887000	42275000	2089300	6541700	0	2743200	2778000	2827900	82508.K1WGJ7	4.95e-87	277	2CN8A@1|root,2QUGH@2759|Eukaryota,38GTU@33154|Opisthokonta,3NWX6@4751|Fungi,3V3TV@5204|Basidiomycota,3VHHY@5234|Tremellales	4751|Fungi	S	phospholipase C	NA	NA	ko:K01771	ko00562,map00562	PI-PLC-X	OTHER	1	7e-06	NA	NA	NA	NA	NA	NA
353017	By MS/MS	By MS/MS	By MS/MS	By MS/MS	By MS/MS	By MS/MS	3533900	5842800	0	20828000	76002000	27803000	2829400	3792600	0	4088500	9680000	7558000	5217.XP_007000638.1	7e-118	350	COG5134@1|root,KOG2989@2759|Eukaryota,38FX9@33154|Opisthokonta,3NV3K@4751|Fungi,3UZ1C@5204|Basidiomycota,3VEIY@5234|Tremellales	4751|Fungi	S	Nuclear mRNA splicing	cwf16	GO:0000349,GO:0000375,GO:0000377,GO:0000393,GO:0000398,GO:0005575,GO:0005622,GO:0005623,GO:0005634,GO:0005681,GO:0005684,GO:0006139,GO:0006396,GO:0006397,GO:0006725,GO:0006807,GO:0008150,GO:0008152,GO:0008380,GO:0009987,GO:0010467,GO:0016043,GO:0016070,GO:0016071,GO:0022607,GO:0022613,GO:0022618,GO:0032991,GO:0034622,GO:0034641,GO:0043170,GO:0043226,GO:0043227,GO:0043229,GO:0043231,GO:0043933,GO:…	NA	NA	DUF572	OTHER	1	0	NA	NA	NA	NA	NA	NA
353089	NA	By MS/MS	NA	NA	NA	NA	0	0	0	0	0	0	0	0	0	0	0	0	82508.K1VVP0	5.08e-176	527	COG0009@1|root,KOG3051@2759|Eukaryota,38DGJ@33154|Opisthokonta,3NU6F@4751|Fungi,3V05Z@5204|Basidiomycota,3VE0W@5234|Tremellales	4751|Fungi	J	Cell growth and or maintenance-related protein	NA	GO:0000049,GO:0000723,GO:0002949,GO:0003674,GO:0003676,GO:0003677,GO:0003697,GO:0003723,GO:0003824,GO:0005488,GO:0005575,GO:0005622,GO:0005623,GO:0005737,GO:0005829,GO:0006139,GO:0006259,GO:0006396,GO:0006399,GO:0006400,GO:0006450,GO:0006725,GO:0006807,GO:0006996,GO:0008033,GO:0008150,GO:0008152,GO:0009451,GO:0009987,GO:0010467,GO:0016043,GO:0016070,GO:0016740,GO:0016772,GO:0016779,GO:0032200,GO:…	ko:K07566	NA	SUA5,Sua5_yciO_yrdC	OTHER	1	0	NA	NA	NA	NA	NA	NA
353353	By MS/MS	By MS/MS	By MS/MS	By MS/MS	By MS/MS	By MS/MS	31591000	83275000	30795000	27147000	91994000	53485000	9839800	13948000	12591000	11962000	5793800	6074500	82508.K1VQI8	0	1251	COG5215@1|root,KOG1241@2759|Eukaryota,38HCJ@33154|Opisthokonta,3NX6P@4751|Fungi,3V074@5204|Basidiomycota,3VDVW@5234|Tremellales	4751|Fungi	UY	Importin-beta N-terminal domain	kap95	GO:0000060,GO:0000166,GO:0001882,GO:0001883,GO:0003674,GO:0005048,GO:0005085,GO:0005087,GO:0005088,GO:0005215,GO:0005488,GO:0005515,GO:0005525,GO:0005575,GO:0005622,GO:0005623,GO:0005634,GO:0005635,GO:0005643,GO:0005737,GO:0005819,GO:0005856,GO:0006605,GO:0006606,GO:0006607,GO:0006610,GO:0006612,GO:0006629,GO:0006644,GO:0006650,GO:0006656,GO:0006793,GO:0006796,GO:0006807,GO:0006810,GO:0006886,GO:…	ko:K14293	ko03013,map03013	HEAT,HEAT_EZ,IBN_N	OTHER	1	0	NA	NA	NA	NA	NA	NA
353535	NA	By MS/MS	NA	By MS/MS	By MS/MS	By matching	0	0	0	9244900	22031000	7729500	0	0	0	0	0	0	5217.XP_007008133.1	0	1052	KOG0946@1|root,KOG0946@2759|Eukaryota,38E2Z@33154|Opisthokonta,3NV2H@4751|Fungi,3UZ3X@5204|Basidiomycota,3VDS1@5234|Tremellales	4751|Fungi	U	Uso1 / p115 like vesicle tethering protein, head region	USO1	GO:0000139,GO:0003674,GO:0005215,GO:0005575,GO:0005622,GO:0005623,GO:0005737,GO:0005783,GO:0005794,GO:0005795,GO:0005798,GO:0006810,GO:0006886,GO:0006888,GO:0006906,GO:0006996,GO:0008104,GO:0008150,GO:0008565,GO:0009987,GO:0012505,GO:0012506,GO:0012507,GO:0015031,GO:0015833,GO:0016020,GO:0016021,GO:0016043,GO:0016050,GO:0016192,GO:0022406,GO:0022607,GO:0030133,GO:0030134,GO:0030135,GO:0030658,GO:…	ko:K11436,ko:K20361	NA	Uso1_p115_C,Uso1_p115_head	OTHER	1	1e-06	NA	NA	NA	NA	NA	NA
353582	NA	By MS/MS	By MS/MS	By matching	By MS/MS	By MS/MS	0	9446200	5506900	5117500	28562000	30268000	0	3288400	3778400	0	3758500	5230900	82508.K1VJK9	1.68e-65	232	COG4886@1|root,KOG0531@2759|Eukaryota,38C24@33154|Opisthokonta,3NUKW@4751|Fungi,3V0AN@5204|Basidiomycota,3VDTD@5234|Tremellales	4751|Fungi	T	occurring C-terminal to leucine-rich repeats	sds22	GO:0000164,GO:0003674,GO:0004857,GO:0004864,GO:0004865,GO:0005575,GO:0005622,GO:0005623,GO:0005634,GO:0005737,GO:0007059,GO:0007088,GO:0007346,GO:0008047,GO:0008104,GO:0008150,GO:0008287,GO:0009892,GO:0009896,GO:0009987,GO:0010563,GO:0010564,GO:0010605,GO:0010638,GO:0010921,GO:0010923,GO:0010965,GO:0019208,GO:0019211,GO:0019212,GO:0019220,GO:0019222,GO:0019888,GO:0023052,GO:0030071,GO:0030234,GO:…	ko:K17550	NA	LRR_4,LRR_6,LRR_8	OTHER	1	0	NA	NA	NA	NA	NA	NA
353669	By MS/MS	By MS/MS	By MS/MS	By MS/MS	By MS/MS	By MS/MS	1383700000	2742900000	1432000000	2583700000	5898300000	5622600000	280460000	336090000	293540000	234240000	245300000	312040000	82508.K1V9P1	7.78e-177	500	COG0039@1|root,KOG1494@2759|Eukaryota,38EX2@33154|Opisthokonta,3NWAG@4751|Fungi,3UY8J@5204|Basidiomycota,3VCV7@5234|Tremellales	4751|Fungi	C	lactate/malate dehydrogenase, NAD binding domain	NA	NA	ko:K00026	ko00020,ko00270,ko00620,ko00630,ko00710,ko01100,ko01110,ko01120,ko01130,ko01200,map00020,map00270,map00620,map00630,map00710,map01100,map01110,map01120,map01130,map01200	Ldh_1_C,Ldh_1_N	OTHER	1	0	NA	NA	NA	NA	NA	NA
353742	By MS/MS	By MS/MS	By MS/MS	By MS/MS	By MS/MS	By MS/MS	7377500	56953000	12091000	20569000	47467000	6641100	4606700	7474800	5073700	5559800	3088800	0	5217.XP_007003345.1	0	1022	KOG2203@1|root,KOG2203@2759|Eukaryota,39JEY@33154|Opisthokonta,3NUYX@4751|Fungi,3UZQU@5204|Basidiomycota,3VEA6@5234|Tremellales	4751|Fungi	S	Cooperates with the reticulon proteins and tubule- shaping DP1 family proteins to generate and maintain the structure of the tubular endoplasmic reticulum network. Has GTPase activity, which is required for its function in ER organization	SEY1	GO:0000166,GO:0001882,GO:0001883,GO:0003674,GO:0003824,GO:0003924,GO:0005488,GO:0005525,GO:0005575,GO:0005622,GO:0005623,GO:0005737,GO:0005783,GO:0005933,GO:0005938,GO:0006810,GO:0006996,GO:0007029,GO:0008150,GO:0008643,GO:0008645,GO:0009405,GO:0009987,GO:0010256,GO:0012505,GO:0015749,GO:0016020,GO:0016021,GO:0016043,GO:0016192,GO:0016320,GO:0016462,GO:0016787,GO:0016817,GO:0016818,GO:0017076,GO:…	NA	NA	RHD3	OTHER	1	0	NA	NA	NA	NA	NA	NA
353765	By matching	By MS/MS	NA	NA	NA	NA	2231600	16895000	0	0	0	0	0	0	0	0	0	0	82508.K1VLP3	1.84e-145	416	COG5249@1|root,KOG1688@2759|Eukaryota,39TID@33154|Opisthokonta,3NZFK@4751|Fungi,3V0ND@5204|Basidiomycota,3VCVN@5234|Tremellales	4751|Fungi	U	Rer1 family	NA	NA	NA	NA	Rer1	OTHER	1	0	NA	NA	NA	NA	NA	NA
353777	NA	NA	NA	By MS/MS	By MS/MS	By matching	0	0	0	23464000	102260000	21953000	0	0	0	9216400	18318000	5191700	82508.K1VIU0	0	1077	2DGWD@1|root,2S5V9@2759|Eukaryota,3A6KI@33154|Opisthokonta,3P5KJ@4751|Fungi,3V1YY@5204|Basidiomycota,3VE3V@5234|Tremellales	4751|Fungi	K	Fungal specific transcription factor domain	NA	NA	NA	NA	Fungal_trans,Zn_clus	OTHER	1	0	NA	NA	NA	NA	NA	NA
353784	NA	By MS/MS	By MS/MS	NA	NA	NA	0	10786000	2662300	0	0	0	0	0	0	0	0	0	82508.K1VK40	6.86000000000914e-313	872	COG1960@1|root,KOG0136@2759|Eukaryota,38BTU@33154|Opisthokonta,3NUCQ@4751|Fungi,3UYEF@5204|Basidiomycota,3VHGG@5234|Tremellales	4751|Fungi	I	Acyl-coenzyme A oxidase N-terminal	NA	NA	ko:K00232	ko00071,ko00592,ko01040,ko01100,ko01110,ko01212,ko03320,ko04024,ko04146,map00071,map00592,map01040,map01100,map01110,map01212,map03320,map04024,map04146	ACOX,Acyl-CoA_dh_1,Acyl-CoA_dh_M,Acyl-CoA_ox_N	OTHER	1	0	NA	NA	NA	NA	NA	NA
353926	By MS/MS	By MS/MS	By MS/MS	By MS/MS	By MS/MS	By matching	2498300	12946000	4896400	6117000	17309000	1550500	0	4559500	3069000	2051200	2163100	0	552467.XP_003193962.1	4.79e-206	607	COG0513@1|root,KOG0342@2759|Eukaryota,38E1A@33154|Opisthokonta,3NYNU@4751|Fungi,3UZJ2@5204|Basidiomycota,3VEH2@5234|Tremellales	4751|Fungi	A	RNA helicase	MSS116	GO:0000372,GO:0000373,GO:0000375,GO:0000376,GO:0000377,GO:0000959,GO:0003674,GO:0003676,GO:0003723,GO:0003724,GO:0003725,GO:0003727,GO:0003729,GO:0003824,GO:0004004,GO:0004386,GO:0005488,GO:0005575,GO:0005622,GO:0005623,GO:0005634,GO:0005730,GO:0005737,GO:0005739,GO:0005759,GO:0006139,GO:0006351,GO:0006354,GO:0006390,GO:0006392,GO:0006396,GO:0006725,GO:0006807,GO:0008026,GO:0008150,GO:0008152,GO:…	ko:K17679	NA	DEAD,Helicase_C	OTHER	1	0	NA	NA	NA	NA	NA	NA
353957	By MS/MS	By MS/MS	By MS/MS	By MS/MS	By MS/MS	By MS/MS	6885700	40416000	17969000	97073000	196300000	250890000	5826500	9732900	7481700	13184000	27989000	41529000	5217.XP_007004793.1	1.98e-65	202	KOG3655@1|root,KOG3655@2759|Eukaryota,3A3EQ@33154|Opisthokonta,3P4QK@4751|Fungi,3V17K@5204|Basidiomycota,3VFGW@5234|Tremellales	4751|Fungi	Z	Cofilin/tropomyosin-type actin-binding protein	NA	NA	NA	NA	Cofilin_ADF	OTHER	1	0	NA	NA	NA	NA	NA	NA
353999	By MS/MS	By MS/MS	By matching	By MS/MS	By MS/MS	By MS/MS	9450100	16065000	8582200	15843000	51556000	43766000	6331600	6409200	6080000	5142600	6387100	7494900	5207.AAW45489	3.02e-101	293	KOG3414@1|root,KOG3414@2759|Eukaryota,39ZUC@33154|Opisthokonta,3P1R3@4751|Fungi,3V0DN@5204|Basidiomycota,3VE88@5234|Tremellales	4751|Fungi	AD	Mitosis protein DIM1	DIB1	GO:0000245,GO:0000375,GO:0000377,GO:0000398,GO:0005575,GO:0005622,GO:0005623,GO:0005634,GO:0005681,GO:0005682,GO:0006139,GO:0006396,GO:0006397,GO:0006725,GO:0006807,GO:0008150,GO:0008152,GO:0008380,GO:0009987,GO:0010467,GO:0016043,GO:0016070,GO:0016071,GO:0022607,GO:0022613,GO:0022618,GO:0030532,GO:0032991,GO:0034622,GO:0034641,GO:0043170,GO:0043226,GO:0043227,GO:0043229,GO:0043231,GO:0043933,GO:…	ko:K12859	ko03040,map03040	DIM1	OTHER	1	1e-06	NA	NA	NA	NA	NA	NA
354481	By matching	By MS/MS	NA	By matching	By MS/MS	NA	2436300	12437000	0	7644800	46647000	0	0	3914800	0	2223000	0	0	82508.K1V2R2	0	1776	KOG1248@1|root,KOG1248@2759|Eukaryota,38B52@33154|Opisthokonta,3NZ15@4751|Fungi,3UZTP@5204|Basidiomycota,3VD9D@5234|Tremellales	4751|Fungi	J	ribosomal protein	RRP12	GO:0000462,GO:0003674,GO:0003676,GO:0003723,GO:0003729,GO:0005488,GO:0005575,GO:0005622,GO:0005623,GO:0005634,GO:0005730,GO:0005737,GO:0005840,GO:0006139,GO:0006364,GO:0006396,GO:0006725,GO:0006807,GO:0008150,GO:0008152,GO:0009987,GO:0010467,GO:0016070,GO:0016072,GO:0022613,GO:0030490,GO:0030684,GO:0030686,GO:0031974,GO:0031981,GO:0032991,GO:0034470,GO:0034641,GO:0034660,GO:0042254,GO:0042274,GO:…	ko:K14794	NA	NUC173	OTHER	1	0	NA	NA	NA	NA	NA	NA
354927	By matching	By MS/MS	By MS/MS	By MS/MS	By MS/MS	By MS/MS	9415400	49205000	10558000	57057000	105220000	41151000	5487800	10148000	5588500	9941500	7673700	5464500	552467.XP_003194534.1	0	910	28H57@1|root,2QPI0@2759|Eukaryota,38GVF@33154|Opisthokonta,3NVQT@4751|Fungi,3UZW7@5204|Basidiomycota,3VEF1@5234|Tremellales	4751|Fungi	-	-	NA	NA	NA	NA	-	OTHER	1	0	NA	NA	NA	NA	NA	NA
354954	NA	By MS/MS	NA	By MS/MS	By MS/MS	NA	0	2707700	0	5530100	20972000	0	0	0	0	0	0	0	552467.XP_003191789.1	0	1014	COG5537@1|root,KOG2011@2759|Eukaryota,38I10@33154|Opisthokonta,3NXJ6@4751|Fungi,3UYQQ@5204|Basidiomycota,3VGGA@5234|Tremellales	4751|Fungi	D	STAG domain	IRR1	GO:0000070,GO:0000228,GO:0000278,GO:0000280,GO:0000775,GO:0000785,GO:0000790,GO:0000792,GO:0000793,GO:0000794,GO:0000798,GO:0000819,GO:0003674,GO:0003676,GO:0003677,GO:0003682,GO:0005488,GO:0005575,GO:0005622,GO:0005623,GO:0005634,GO:0005694,GO:0005720,GO:0005721,GO:0005737,GO:0005829,GO:0006996,GO:0007049,GO:0007059,GO:0007062,GO:0007063,GO:0007064,GO:0007088,GO:0007346,GO:0008104,GO:0008150,GO:…	ko:K06671	ko04110,ko04111,ko04113,map04110,map04111,map04113	STAG	OTHER	1	0	NA	NA	NA	NA	NA	NA
355169	By MS/MS	By MS/MS	By MS/MS	By MS/MS	By MS/MS	By MS/MS	9086000	26669000	12984000	19748000	142250000	40955000	6674800	6076000	7479000	6217600	11141000	6957500	82508.K1WP07	1.19e-70	223	KOG4813@1|root,KOG4813@2759|Eukaryota,39S4V@33154|Opisthokonta,3NWVD@4751|Fungi,3V1DP@5204|Basidiomycota,3VF53@5234|Tremellales	4751|Fungi	J	component of the eukaryotic translation initiation factor 3 (eIF-3) complex, which is involved in protein synthesis of a specialized repertoire of mRNAs and, together with other initiation factors, stimulates binding of mRNA and methionyl-tRNAi to the 40S ribosome. The eIF-3 complex specifically targets and initiates translation of a subset of mRNAs involved in cell proliferation	HCR1	GO:0000462,GO:0002181,GO:0003674,GO:0003676,GO:0003723,GO:0003743,GO:0005488,GO:0005575,GO:0005622,GO:0005623,GO:0005737,GO:0005852,GO:0006139,GO:0006364,GO:0006396,GO:0006412,GO:0006413,GO:0006518,GO:0006725,GO:0006807,GO:0008135,GO:0008150,GO:0008152,GO:0009058,GO:0009059,GO:0009987,GO:0010467,GO:0010494,GO:0016070,GO:0016072,GO:0019538,GO:0022613,GO:0030490,GO:0032991,GO:0034470,GO:0034641,GO:…	ko:K03245	ko03013,map03013	eIF3_subunit	OTHER	1	0	NA	NA	NA	NA	NA	NA
355185	By MS/MS	By MS/MS	By MS/MS	By MS/MS	By MS/MS	By MS/MS	4679200	14123000	3375800	12024000	27951000	11715000	3748200	6334700	0	0	0	0	82508.K1VT50	3.73e-215	608	KOG2291@1|root,KOG2291@2759|Eukaryota,38DP8@33154|Opisthokonta,3NXCK@4751|Fungi,3UZJB@5204|Basidiomycota,3VDGW@5234|Tremellales	4751|Fungi	O	Essential subunit of the N-oligosaccharyl transferase (OST) complex which catalyzes the transfer of a high mannose oligosaccharide from a lipid-linked oligosaccharide donor to an asparagine residue within an Asn-X-Ser Thr consensus motif in nascent polypeptide chains	OST1	GO:0003674,GO:0003824,GO:0004576,GO:0004579,GO:0005575,GO:0005622,GO:0005623,GO:0005737,GO:0005783,GO:0005789,GO:0006464,GO:0006486,GO:0006487,GO:0006807,GO:0008150,GO:0008152,GO:0008250,GO:0009058,GO:0009059,GO:0009100,GO:0009101,GO:0009987,GO:0012505,GO:0016020,GO:0016740,GO:0016757,GO:0016758,GO:0018193,GO:0018196,GO:0018279,GO:0019538,GO:0031984,GO:0032991,GO:0034645,GO:0036211,GO:0042175,GO:…	ko:K12666	ko00510,ko00513,ko01100,ko04141,map00510,map00513,map01100,map04141	Ribophorin_I	SP	0.000705	0.999269	CS pos: 17-18. Pr: 0.5842	NA	NA	NA	NA	NA
355687	By MS/MS	By MS/MS	By MS/MS	By MS/MS	By MS/MS	By MS/MS	8362800	27046000	8288000	26164000	40366000	49749000	5428800	8128100	5523800	6691900	4270600	4209900	5207.AAW40738	0	1185	COG4354@1|root,KOG1062@2759|Eukaryota,38C9Z@33154|Opisthokonta,3NU8A@4751|Fungi,3UYEM@5204|Basidiomycota,3VEGD@5234|Tremellales	4751|Fungi	U	Adaptin C-terminal domain	APL4	GO:0003674,GO:0005488,GO:0005515,GO:0005575,GO:0005622,GO:0005623,GO:0005737,GO:0005768,GO:0005794,GO:0005798,GO:0006810,GO:0006886,GO:0006892,GO:0006896,GO:0007034,GO:0008104,GO:0008150,GO:0012505,GO:0012506,GO:0012510,GO:0015031,GO:0015833,GO:0016020,GO:0016192,GO:0016197,GO:0030117,GO:0030118,GO:0030119,GO:0030120,GO:0030121,GO:0030125,GO:0030130,GO:0030131,GO:0030133,GO:0030135,GO:0030136,GO:…	ko:K12391	ko04142,map04142	Adaptin_N,Alpha_adaptinC2	OTHER	1	0	NA	NA	NA	NA	NA	NA
355830	By MS/MS	By MS/MS	By MS/MS	By MS/MS	By MS/MS	By MS/MS	29569000	62153000	28757000	36212000	61223000	41588000	7336500	7308100	6907100	3445500	2880300	3541300	82508.K1VYD8	0	2370	COG3408@1|root,KOG3625@2759|Eukaryota,38BRH@33154|Opisthokonta,3NU7F@4751|Fungi,3UYFD@5204|Basidiomycota,3VE4M@5234|Tremellales	4751|Fungi	G	Glycogen debranching enzyme, glucanotransferase domain	GDB1	GO:0000272,GO:0003674,GO:0003824,GO:0004133,GO:0004134,GO:0004135,GO:0004553,GO:0005575,GO:0005622,GO:0005623,GO:0005737,GO:0005739,GO:0005975,GO:0005976,GO:0005977,GO:0005980,GO:0006073,GO:0006091,GO:0006112,GO:0008150,GO:0008152,GO:0009056,GO:0009057,GO:0009251,GO:0009987,GO:0015926,GO:0015980,GO:0016052,GO:0016740,GO:0016757,GO:0016758,GO:0016787,GO:0016798,GO:0043170,GO:0043226,GO:0043227,GO:…	ko:K01196	ko00500,ko01100,ko01110,map00500,map01100,map01110	GDE_C,hDGE_amylase,hGDE_N,hGDE_central	OTHER	1	1e-06	NA	GH	GH133	NA	NA	NA
355830	By MS/MS	By MS/MS	By MS/MS	By MS/MS	By MS/MS	By MS/MS	29569000	62153000	28757000	36212000	61223000	41588000	7336500	7308100	6907100	3445500	2880300	3541300	82508.K1VYD8	0	2370	COG3408@1|root,KOG3625@2759|Eukaryota,38BRH@33154|Opisthokonta,3NU7F@4751|Fungi,3UYFD@5204|Basidiomycota,3VE4M@5234|Tremellales	4751|Fungi	G	Glycogen debranching enzyme, glucanotransferase domain	GDB1	GO:0000272,GO:0003674,GO:0003824,GO:0004133,GO:0004134,GO:0004135,GO:0004553,GO:0005575,GO:0005622,GO:0005623,GO:0005737,GO:0005739,GO:0005975,GO:0005976,GO:0005977,GO:0005980,GO:0006073,GO:0006091,GO:0006112,GO:0008150,GO:0008152,GO:0009056,GO:0009057,GO:0009251,GO:0009987,GO:0015926,GO:0015980,GO:0016052,GO:0016740,GO:0016757,GO:0016758,GO:0016787,GO:0016798,GO:0043170,GO:0043226,GO:0043227,GO:…	ko:K01196	ko00500,ko01100,ko01110,map00500,map01100,map01110	GDE_C,hDGE_amylase,hGDE_N,hGDE_central	OTHER	1	1e-06	NA	GH	GH13	GH13_25	GH13:71.1	GH13*8
355830	By MS/MS	By MS/MS	By MS/MS	By MS/MS	By MS/MS	By MS/MS	29569000	62153000	28757000	36212000	61223000	41588000	7336500	7308100	6907100	3445500	2880300	3541300	82508.K1VYD8	0	2370	COG3408@1|root,KOG3625@2759|Eukaryota,38BRH@33154|Opisthokonta,3NU7F@4751|Fungi,3UYFD@5204|Basidiomycota,3VE4M@5234|Tremellales	4751|Fungi	G	Glycogen debranching enzyme, glucanotransferase domain	GDB1	GO:0000272,GO:0003674,GO:0003824,GO:0004133,GO:0004134,GO:0004135,GO:0004553,GO:0005575,GO:0005622,GO:0005623,GO:0005737,GO:0005739,GO:0005975,GO:0005976,GO:0005977,GO:0005980,GO:0006073,GO:0006091,GO:0006112,GO:0008150,GO:0008152,GO:0009056,GO:0009057,GO:0009251,GO:0009987,GO:0015926,GO:0015980,GO:0016052,GO:0016740,GO:0016757,GO:0016758,GO:0016787,GO:0016798,GO:0043170,GO:0043226,GO:0043227,GO:…	ko:K01196	ko00500,ko01100,ko01110,map00500,map01100,map01110	GDE_C,hDGE_amylase,hGDE_N,hGDE_central	OTHER	1	1e-06	NA	GH	GH13	GH13_25	GH13:181.1	GH13*18
355888	By MS/MS	By MS/MS	By MS/MS	By MS/MS	By MS/MS	By MS/MS	1708700	26356000	3435300	26119000	57926000	14162000	0	7647600	0	5812000	4941400	3829500	552467.XP_003194609.1	0	1211	COG0464@1|root,KOG0741@2759|Eukaryota,38CBE@33154|Opisthokonta,3NV43@4751|Fungi,3V07G@5204|Basidiomycota,3VDU7@5234|Tremellales	4751|Fungi	O	Cell division protein 48 (CDC48), domain 2	SEC18	GO:0000045,GO:0000149,GO:0000166,GO:0003674,GO:0003824,GO:0005488,GO:0005515,GO:0005524,GO:0005543,GO:0005575,GO:0005622,GO:0005623,GO:0005737,GO:0005794,GO:0005829,GO:0005937,GO:0006810,GO:0006886,GO:0006888,GO:0006891,GO:0006892,GO:0006893,GO:0006906,GO:0006914,GO:0006996,GO:0007033,GO:0008104,GO:0008144,GO:0008150,GO:0008152,GO:0008289,GO:0009056,GO:0009987,GO:0012505,GO:0015031,GO:0015833,GO:…	ko:K06027	ko04138,ko04721,ko04727,ko04962,map04138,map04721,map04727,map04962	AAA,CDC48_2,CDC48_N	OTHER	1	0	NA	NA	NA	NA	NA	NA
355945	By MS/MS	By MS/MS	By MS/MS	By MS/MS	By MS/MS	By MS/MS	177460000	431670000	174300000	302440000	541750000	402430000	56979000	87868000	51306000	61245000	39530000	40816000	82508.K1VQB7	0	889	COG5023@1|root,KOG1376@2759|Eukaryota,38E06@33154|Opisthokonta,3NVD8@4751|Fungi,3UY6S@5204|Basidiomycota,3VE0T@5234|Tremellales	4751|Fungi	Z	Tubulin is the major constituent of microtubules. It binds two moles of GTP, one at an exchangeable site on the beta chain and one at a non-exchangeable site on the alpha chain	TUB1	GO:0000003,GO:0000070,GO:0000226,GO:0000235,GO:0000278,GO:0000280,GO:0000819,GO:0000922,GO:0003674,GO:0005198,GO:0005200,GO:0005575,GO:0005622,GO:0005623,GO:0005634,GO:0005737,GO:0005815,GO:0005816,GO:0005818,GO:0005819,GO:0005827,GO:0005828,GO:0005856,GO:0005874,GO:0005876,GO:0005880,GO:0005881,GO:0006810,GO:0006928,GO:0006996,GO:0007005,GO:0007010,GO:0007017,GO:0007018,GO:0007049,GO:0007051,GO:…	ko:K07374	ko04145,ko04210,ko04530,ko04540,ko05130,map04145,map04210,map04530,map04540,map05130	Tubulin,Tubulin_C	OTHER	1	0	NA	NA	NA	NA	NA	NA
355996	By MS/MS	By MS/MS	NA	By MS/MS	NA	By MS/MS	2391700	2092000	0	15398000	0	0	0	0	0	0	0	0	82508.K1VUT8	9.92e-112	338	KOG3065@1|root,KOG3065@2759|Eukaryota,39UUG@33154|Opisthokonta,3NXKV@4751|Fungi,3V03W@5204|Basidiomycota,3VD1Y@5234|Tremellales	4751|Fungi	U	Protein transport protein sec9	SEC9	GO:0000003,GO:0000149,GO:0003006,GO:0003674,GO:0005484,GO:0005488,GO:0005515,GO:0005543,GO:0005546,GO:0005575,GO:0005622,GO:0005623,GO:0005628,GO:0005634,GO:0005737,GO:0005829,GO:0005886,GO:0005933,GO:0005935,GO:0006810,GO:0006886,GO:0006887,GO:0006892,GO:0006893,GO:0006906,GO:0006996,GO:0007049,GO:0008104,GO:0008150,GO:0008289,GO:0009653,GO:0009987,GO:0010927,GO:0015031,GO:0015833,GO:0016020,GO:…	ko:K19950	NA	-	OTHER	1	0	NA	NA	NA	NA	NA	NA
356068	By MS/MS	By MS/MS	By matching	By MS/MS	By MS/MS	NA	936440	10534000	1561600	2256600	0	0	0	0	0	0	0	0	82508.K1VJ46	0	1791	KOG4833@1|root,KOG4833@2759|Eukaryota,39KN4@33154|Opisthokonta,3Q51A@4751|Fungi,3VC6C@5204|Basidiomycota,3VD9Y@5234|Tremellales	4751|Fungi	S	Nucleoporin subcomplex protein binding to Pom34	NA	NA	ko:K14311	ko03013,map03013	Nup188	OTHER	1	0	NA	NA	NA	NA	NA	NA
356073	By MS/MS	By MS/MS	By MS/MS	By MS/MS	By MS/MS	By MS/MS	264840000	431310000	315050000	972060000	1504800000	1402200000	119770000	107740000	160310000	222560000	195740000	185450000	82508.K1WF94	6.65e-88	259	COG5045@1|root,KOG3344@2759|Eukaryota,3A3IE@33154|Opisthokonta,3P3VQ@4751|Fungi,3V19M@5204|Basidiomycota,3VF8V@5234|Tremellales	4751|Fungi	J	Plectin/S10 domain	NA	GO:0000028,GO:0002181,GO:0003674,GO:0003676,GO:0003723,GO:0003735,GO:0005198,GO:0005488,GO:0005575,GO:0005622,GO:0005623,GO:0005737,GO:0005829,GO:0005840,GO:0006403,GO:0006405,GO:0006407,GO:0006412,GO:0006518,GO:0006611,GO:0006807,GO:0006810,GO:0006886,GO:0006913,GO:0006996,GO:0008104,GO:0008150,GO:0008152,GO:0009058,GO:0009059,GO:0009987,GO:0010467,GO:0015031,GO:0015833,GO:0015931,GO:0015935,GO:…	ko:K02947	ko03010,map03010	S10_plectin	OTHER	1	9e-06	NA	NA	NA	NA	NA	NA
356135	By MS/MS	By MS/MS	By MS/MS	By MS/MS	By MS/MS	By MS/MS	8219800	15905000	11486000	34351000	60974000	65941000	10476000	0	9822500	10241000	10669000	13328000	82508.K1VQ92	6.29e-156	443	COG0627@1|root,KOG3101@2759|Eukaryota,38RFR@33154|Opisthokonta,3NW46@4751|Fungi,3UZ8V@5204|Basidiomycota,3VESU@5234|Tremellales	4751|Fungi	S	Serine hydrolase involved in the detoxification of formaldehyde	NA	GO:0003674,GO:0003824,GO:0005575,GO:0005622,GO:0005623,GO:0005737,GO:0005829,GO:0006081,GO:0008150,GO:0008152,GO:0009056,GO:0009636,GO:0009987,GO:0010033,GO:0016787,GO:0016788,GO:0016790,GO:0016999,GO:0017001,GO:0017144,GO:0018738,GO:0042221,GO:0044237,GO:0044248,GO:0044281,GO:0044282,GO:0044424,GO:0044444,GO:0044464,GO:0046185,GO:0046292,GO:0046294,GO:0050896,GO:0051716,GO:0070887,GO:0071704,GO:…	ko:K01070	ko00680,ko01120,ko01200,map00680,map01120,map01200	Esterase	OTHER	1	9e-06	NA	NA	NA	NA	NA	NA
356177	By matching	By MS/MS	By MS/MS	By MS/MS	By MS/MS	By MS/MS	8658900	23448000	6198800	43707000	87957000	53601000	3765500	4492700	3655300	4021400	3587100	3765100	82508.K1VQ83	0	1052	COG5164@1|root,KOG1999@2759|Eukaryota,38GVC@33154|Opisthokonta,3NUM8@4751|Fungi,3UY1R@5204|Basidiomycota,3VE6S@5234|Tremellales	4751|Fungi	K	The SPT4-SPT5 complex mediates both activation and inhibition of transcription elongation, and plays a role in pre- mRNA processing. This complex seems to be important for the stability of the RNA polymerase II elongation machinery on the chromatin template but not for the inherent ability of this machinery to translocate down the gene	SPT5	GO:0000228,GO:0000375,GO:0000377,GO:0000398,GO:0000785,GO:0000790,GO:0000988,GO:0000990,GO:0000991,GO:0000993,GO:0001042,GO:0001098,GO:0001099,GO:0001179,GO:0001181,GO:0003674,GO:0003676,GO:0003677,GO:0003723,GO:0003729,GO:0005488,GO:0005515,GO:0005575,GO:0005622,GO:0005623,GO:0005634,GO:0005654,GO:0005694,GO:0005737,GO:0005739,GO:0006139,GO:0006282,GO:0006351,GO:0006354,GO:0006355,GO:0006356,GO:…	ko:K15172	NA	CTD,KOW,Spt5-NGN,Spt5_N	OTHER	1	0	NA	NA	NA	NA	NA	NA
356221	NA	By MS/MS	NA	By MS/MS	By MS/MS	By MS/MS	0	10901000	0	13042000	87514000	78943000	0	4797700	0	0	5560100	9016500	82508.K1WGG7	1.27e-121	353	COG0062@1|root,KOG2585@2759|Eukaryota,38ZZ7@33154|Opisthokonta,3NXDZ@4751|Fungi,3V0DF@5204|Basidiomycota,3VEUB@5234|Tremellales	4751|Fungi	F	Catalyzes the epimerization of the S- and R-forms of NAD(P)HX, a damaged form of NAD(P)H that is a result of enzymatic or heat-dependent hydration. This is a prerequisite for the S- specific NAD(P)H-hydrate dehydratase to allow the repair of both epimers of NAD(P)HX	NA	GO:0003674,GO:0003824,GO:0005575,GO:0005622,GO:0005623,GO:0005737,GO:0005739,GO:0006139,GO:0006725,GO:0006732,GO:0006733,GO:0006734,GO:0006739,GO:0006753,GO:0006793,GO:0006796,GO:0006807,GO:0008150,GO:0008152,GO:0009117,GO:0009987,GO:0016853,GO:0016854,GO:0019362,GO:0019637,GO:0019674,GO:0034641,GO:0043226,GO:0043227,GO:0043229,GO:0043231,GO:0044237,GO:0044238,GO:0044281,GO:0044424,GO:0044444,GO:…	ko:K17759	NA	YjeF_N	OTHER	1	0	NA	NA	NA	NA	NA	NA
356276	By MS/MS	By MS/MS	By MS/MS	By matching	By MS/MS	By MS/MS	0	11189000	4895600	9306500	32868000	9734100	0	0	0	0	0	0	552467.XP_003192978.1	2.95e-262	733	COG3200@1|root,2QPP7@2759|Eukaryota,38HR5@33154|Opisthokonta,3NXFG@4751|Fungi,3UZC8@5204|Basidiomycota,3VCXJ@5234|Tremellales	4751|Fungi	E	Class-II DAHP synthetase family	NA	NA	ko:K01626	ko00400,ko01100,ko01110,ko01130,ko01230,ko02024,map00400,map01100,map01110,map01130,map01230,map02024	DAHP_synth_2	OTHER	1	0	NA	NA	NA	NA	NA	NA
356485	By MS/MS	By MS/MS	By MS/MS	By MS/MS	By MS/MS	By MS/MS	637600000	1571300000	577950000	1227000000	2258100000	1278200000	134290000	177960000	146270000	195090000	151360000	126430000	82508.K1WYH5	4.22e-145	412	COG0092@1|root,KOG3181@2759|Eukaryota,38CWQ@33154|Opisthokonta,3NU07@4751|Fungi,3UXT7@5204|Basidiomycota,3VCYP@5234|Tremellales	4751|Fungi	J	Belongs to the universal ribosomal protein uS3 family	RPS3	GO:0000054,GO:0000056,GO:0000702,GO:0002181,GO:0003674,GO:0003676,GO:0003677,GO:0003684,GO:0003735,GO:0003824,GO:0003906,GO:0005198,GO:0005488,GO:0005575,GO:0005622,GO:0005623,GO:0005634,GO:0005737,GO:0005829,GO:0005840,GO:0006139,GO:0006259,GO:0006281,GO:0006403,GO:0006405,GO:0006407,GO:0006412,GO:0006518,GO:0006611,GO:0006725,GO:0006807,GO:0006810,GO:0006886,GO:0006913,GO:0006950,GO:0006974,GO:…	ko:K02985	ko03010,map03010	KH_2,Ribosomal_S3_C	OTHER	1	0	NA	NA	NA	NA	NA	NA
356571	By matching	By MS/MS	By matching	By MS/MS	By MS/MS	By MS/MS	9985000	20504000	7538000	21873000	41954000	26530000	5693900	4284000	5084700	5955300	3746800	4325000	5207.AAW46373	9.12e-146	416	KOG0185@1|root,KOG0185@2759|Eukaryota,38G4U@33154|Opisthokonta,3NUK4@4751|Fungi,3UXUP@5204|Basidiomycota,3VD13@5234|Tremellales	4751|Fungi	O	Proteasome subunit	PRE4	GO:0000502,GO:0005575,GO:0005622,GO:0005623,GO:0005634,GO:0005737,GO:0005783,GO:0005789,GO:0005829,GO:0005839,GO:0006508,GO:0006511,GO:0006807,GO:0007088,GO:0007346,GO:0008150,GO:0008152,GO:0009056,GO:0009057,GO:0009896,GO:0009987,GO:0010498,GO:0010499,GO:0010564,GO:0010638,GO:0010965,GO:0012505,GO:0016020,GO:0016043,GO:0019538,GO:0019774,GO:0019941,GO:0022607,GO:0030071,GO:0030163,GO:0031331,GO:…	ko:K02736	ko03050,map03050	Proteasome	OTHER	1	0	NA	NA	NA	NA	NA	NA
356652	By MS/MS	By MS/MS	By MS/MS	By matching	By MS/MS	By MS/MS	7531800	5481300	9777200	4348700	23777000	21150000	3804100	2495700	3558800	0	2678300	3432600	552467.XP_003191925.1	9.11e-125	367	COG1075@1|root,KOG2541@2759|Eukaryota,38HI2@33154|Opisthokonta,3NWUT@4751|Fungi,3V0I7@5204|Basidiomycota,3VDF0@5234|Tremellales	4751|Fungi	IO	Palmitoyl protein thioesterase	NA	GO:0002084,GO:0003674,GO:0003824,GO:0005575,GO:0005622,GO:0005623,GO:0005737,GO:0005783,GO:0005789,GO:0006464,GO:0006486,GO:0006487,GO:0006629,GO:0006643,GO:0006665,GO:0006807,GO:0006873,GO:0006885,GO:0007035,GO:0008150,GO:0008152,GO:0008474,GO:0008610,GO:0009056,GO:0009057,GO:0009058,GO:0009059,GO:0009100,GO:0009101,GO:0009987,GO:0012505,GO:0016020,GO:0016021,GO:0016462,GO:0016787,GO:0016788,GO:…	ko:K01074	ko00062,ko01100,ko01212,ko04142,map00062,map01100,map01212,map04142	Palm_thioest	SP	0.015195	0.984799	CS pos: 15-16. Pr: 0.9627	NA	NA	NA	NA	NA
356819	By MS/MS	By MS/MS	By MS/MS	By MS/MS	By MS/MS	By MS/MS	33997000	99837000	30477000	121630000	381250000	232230000	9467800	14562000	10158000	22935000	23064000	16811000	82508.K1VX31	4.88e-69	216	2CHWM@1|root,2S65Y@2759|Eukaryota,3A7A0@33154|Opisthokonta,3P5C6@4751|Fungi,3V1QW@5204|Basidiomycota,3VFHZ@5234|Tremellales	4751|Fungi	S	kda subunit	NA	NA	NA	NA	-	OTHER	1	0	NA	NA	NA	NA	NA	NA
356838	By MS/MS	By MS/MS	By MS/MS	By MS/MS	By MS/MS	By MS/MS	47926000	153820000	38353000	98804000	209810000	138930000	8295000	11907000	6706800	8092000	6397800	5593100	552467.XP_003192030.1	0	1250	COG0065@1|root,KOG0454@2759|Eukaryota,38DTW@33154|Opisthokonta,3NUV6@4751|Fungi,3UY8V@5204|Basidiomycota,3VCPY@5234|Tremellales	4751|Fungi	E	Catalyzes the isomerization between 2-isopropylmalate and 3-isopropylmalate, via the formation of 2-isopropylmaleate	LEU1	GO:0003674,GO:0003824,GO:0003861,GO:0005575,GO:0005622,GO:0005623,GO:0005737,GO:0005829,GO:0006082,GO:0006520,GO:0006551,GO:0006807,GO:0008150,GO:0008152,GO:0008652,GO:0009058,GO:0009081,GO:0009082,GO:0009098,GO:0009987,GO:0010494,GO:0016053,GO:0016829,GO:0016835,GO:0016836,GO:0019752,GO:0032991,GO:0035770,GO:0036464,GO:0043226,GO:0043228,GO:0043229,GO:0043232,GO:0043436,GO:0044237,GO:0044238,GO:…	ko:K01702	ko00290,ko01100,ko01110,ko01210,ko01230,map00290,map01100,map01110,map01210,map01230	Aconitase,Aconitase_C	OTHER	1	0	NA	NA	NA	NA	NA	NA
356921	By MS/MS	By MS/MS	By MS/MS	By MS/MS	By MS/MS	By MS/MS	19841000	56829000	25383000	71150000	104540000	52158000	7429000	12795000	9061900	13381000	8151800	6214400	5217.XP_007004312.1	2.5e-287	790	COG1224@1|root,KOG2680@2759|Eukaryota,38DYY@33154|Opisthokonta,3NVB1@4751|Fungi,3UYJP@5204|Basidiomycota,3VEK3@5234|Tremellales	4751|Fungi	L	participates in several chromatin remodeling complexes, including the SWR1 and the INO80 complexes	RVB2	GO:0000123,GO:0000228,GO:0000491,GO:0000492,GO:0000785,GO:0000790,GO:0000812,GO:0003674,GO:0003678,GO:0003824,GO:0004003,GO:0004386,GO:0005575,GO:0005622,GO:0005623,GO:0005634,GO:0005654,GO:0005694,GO:0006139,GO:0006325,GO:0006338,GO:0006355,GO:0006357,GO:0006364,GO:0006396,GO:0006464,GO:0006473,GO:0006475,GO:0006725,GO:0006807,GO:0006996,GO:0008026,GO:0008094,GO:0008150,GO:0008152,GO:0009889,GO:…	ko:K11338	NA	TIP49	OTHER	1	0	NA	NA	NA	NA	NA	NA
356964	By MS/MS	By MS/MS	By MS/MS	By MS/MS	By MS/MS	By MS/MS	435650000	897550000	451810000	3060700000	10370000000	10846000000	85237000	108990000	128600000	117510000	422040000	691390000	82508.K1VD81	4.14e-296	818	COG1249@1|root,KOG1335@2759|Eukaryota,38CSR@33154|Opisthokonta,3NXXS@4751|Fungi,3UYKN@5204|Basidiomycota,3VDKG@5234|Tremellales	4751|Fungi	C	Glucose inhibited division protein A	LPD1	GO:0001505,GO:0003674,GO:0003824,GO:0004148,GO:0004375,GO:0004591,GO:0004738,GO:0004739,GO:0005575,GO:0005622,GO:0005623,GO:0005737,GO:0005739,GO:0005759,GO:0005947,GO:0005960,GO:0005967,GO:0006082,GO:0006084,GO:0006085,GO:0006086,GO:0006090,GO:0006091,GO:0006103,GO:0006139,GO:0006163,GO:0006164,GO:0006520,GO:0006544,GO:0006546,GO:0006549,GO:0006550,GO:0006551,GO:0006552,GO:0006563,GO:0006564,GO:…	ko:K00382,ko:K17583	ko00010,ko00020,ko00260,ko00280,ko00620,ko00630,ko00640,ko01100,ko01110,ko01120,ko01130,ko01200,map00010,map00020,map00260,map00280,map00620,map00630,map00640,map01100,map01110,map01120,map01130,map01200	Pyr_redox_2,Pyr_redox_dim	OTHER	1	0	NA	NA	NA	NA	NA	NA
357080	By MS/MS	By MS/MS	By MS/MS	By MS/MS	By matching	By MS/MS	10768000	23007000	5834000	2371100	4166700	2477000	6597200	8234300	3681700	0	0	0	82508.K1WIG2	1.14e-170	484	COG2070@1|root,2QTWN@2759|Eukaryota,397Z1@33154|Opisthokonta,3NWW5@4751|Fungi,3V06Y@5204|Basidiomycota,3VGNT@5234|Tremellales	4751|Fungi	E	Nitronate monooxygenase	NA	NA	NA	NA	NMO	OTHER	1	2.8e-05	NA	NA	NA	NA	NA	NA
357103	By MS/MS	By MS/MS	By MS/MS	By MS/MS	By MS/MS	By MS/MS	14002000	30194000	16193000	18631000	42107000	26931000	6462900	5323500	5853100	5684000	3325000	2960900	82508.K1VGF6	1.32e-204	580	COG1902@1|root,KOG0134@2759|Eukaryota,39RM1@33154|Opisthokonta,3NUUE@4751|Fungi,3UZTD@5204|Basidiomycota,3VEKV@5234|Tremellales	4751|Fungi	C	NADH:flavin oxidoreductase / NADH oxidase family	NA	NA	NA	NA	Oxidored_FMN	OTHER	1	0	NA	NA	NA	NA	NA	NA
357209	By MS/MS	By MS/MS	By MS/MS	By MS/MS	By MS/MS	By MS/MS	1422800	18621000	16479000	63098000	217390000	262680000	0	5180400	8470900	9379700	11584000	20389000	5207.AAW45034	2.6e-113	328	COG0131@1|root,KOG3143@2759|Eukaryota,38GFB@33154|Opisthokonta,3NV4T@4751|Fungi,3V02Q@5204|Basidiomycota,3VDKU@5234|Tremellales	4751|Fungi	E	Imidazoleglycerol-phosphate dehydratase	HIS3	GO:0000105,GO:0003674,GO:0003824,GO:0004424,GO:0006082,GO:0006520,GO:0006547,GO:0006725,GO:0006807,GO:0008150,GO:0008152,GO:0008652,GO:0009058,GO:0009987,GO:0016053,GO:0016829,GO:0016835,GO:0016836,GO:0018130,GO:0019438,GO:0019752,GO:0034641,GO:0043436,GO:0044237,GO:0044238,GO:0044249,GO:0044281,GO:0044283,GO:0046394,GO:0046483,GO:0052803,GO:0071704,GO:1901360,GO:1901362,GO:1901564,GO:1901566,GO:…	ko:K01693	ko00340,ko01100,ko01110,ko01230,map00340,map01100,map01110,map01230	IGPD	OTHER	1	0	NA	NA	NA	NA	NA	NA
357288	NA	By MS/MS	NA	By MS/MS	By MS/MS	By matching	0	3586200	0	3925000	6695300	3452100	0	0	0	0	0	0	82508.K1VI01	5.68e-183	542	2BW4K@1|root,2S6KZ@2759|Eukaryota,3A797@33154|Opisthokonta,3P5X0@4751|Fungi,3V1UB@5204|Basidiomycota,3VDXX@5234|Tremellales	4751|Fungi	-	-	NA	NA	NA	NA	-	OTHER	1	0	NA	NA	NA	NA	NA	NA
357352	By MS/MS	By MS/MS	By MS/MS	By MS/MS	By MS/MS	By MS/MS	4514000000	2604800000	3863600000	7309500000	27212000000	36574000000	818000000	270330000	698690000	618050000	945530000	1835400000	NA	NA	NA	NA	NA	NA	NA	NA	NA	NA	NA	NA	OTHER	0.998637	0.001401	NA	NA	NA	NA	NA	NA
357450	By MS/MS	By MS/MS	By MS/MS	By MS/MS	By MS/MS	By MS/MS	65587000	206860000	90390000	268170000	2776200000	858460000	28433000	48818000	31857000	54704000	115420000	64218000	82508.K1VID6	8.79e-86	255	COG0185@1|root,KOG0898@2759|Eukaryota,39ZV8@33154|Opisthokonta,3NXXB@4751|Fungi,3V0Z7@5204|Basidiomycota,3VF61@5234|Tremellales	4751|Fungi	J	Belongs to the universal ribosomal protein uS19 family	RPS15	GO:0000028,GO:0000054,GO:0000056,GO:0002181,GO:0003674,GO:0003735,GO:0005198,GO:0005575,GO:0005622,GO:0005623,GO:0005737,GO:0005829,GO:0005840,GO:0006403,GO:0006405,GO:0006407,GO:0006412,GO:0006518,GO:0006611,GO:0006807,GO:0006810,GO:0006886,GO:0006913,GO:0006996,GO:0008104,GO:0008150,GO:0008152,GO:0009058,GO:0009059,GO:0009987,GO:0010467,GO:0015031,GO:0015833,GO:0015931,GO:0015935,GO:0016043,GO:…	ko:K02958	ko03010,map03010	Ribosomal_S19	OTHER	1	0	NA	NA	NA	NA	NA	NA
357697	By MS/MS	By MS/MS	By MS/MS	By MS/MS	By MS/MS	By MS/MS	97325000	263720000	98094000	123090000	264410000	238860000	18658000	27399000	21032000	17651000	13966000	16046000	5217.XP_007000481.1	1.72e-212	596	COG0183@1|root,KOG1391@2759|Eukaryota,39QWG@33154|Opisthokonta,3NVJ3@4751|Fungi,3V059@5204|Basidiomycota,3VCZZ@5234|Tremellales	4751|Fungi	I	Thiolase, N-terminal domain	NA	NA	ko:K07508	ko00062,ko00071,ko00280,ko01100,ko01110,ko01130,ko01212,map00062,map00071,map00280,map01100,map01110,map01130,map01212	Thiolase_C,Thiolase_N	OTHER	1	0	NA	NA	NA	NA	NA	NA
357711	By matching	By MS/MS	NA	By MS/MS	By MS/MS	By matching	4983700	3697100	0	13721000	75729000	34696000	0	0	0	0	0	0	5217.XP_007000401.1	1.95e-175	508	COG5391@1|root,KOG2273@2759|Eukaryota,38FQS@33154|Opisthokonta,3NV7M@4751|Fungi,3UZ81@5204|Basidiomycota,3VEXK@5234|Tremellales	4751|Fungi	U	Retrograde transport, endosome to Golgi-related protein	VPS17	GO:0000003,GO:0003006,GO:0003674,GO:0005488,GO:0005543,GO:0005575,GO:0005622,GO:0005623,GO:0005628,GO:0005737,GO:0005768,GO:0006810,GO:0006886,GO:0006897,GO:0006996,GO:0007049,GO:0008104,GO:0008150,GO:0008289,GO:0009653,GO:0009987,GO:0010927,GO:0012505,GO:0015031,GO:0015833,GO:0016020,GO:0016043,GO:0016050,GO:0016192,GO:0016197,GO:0016482,GO:0019898,GO:0019953,GO:0022402,GO:0022413,GO:0022414,GO:…	NA	NA	PX,Vps5	OTHER	1	0	NA	NA	NA	NA	NA	NA
357716	By MS/MS	By matching	By matching	NA	By MS/MS	By MS/MS	6423500	10224000	6679600	0	27970000	11325000	2204300	0	0	0	2074000	1987100	82508.K1V8M2	1.61e-251	708	COG5165@1|root,KOG0526@2759|Eukaryota,38CT0@33154|Opisthokonta,3NWB9@4751|Fungi,3UZ77@5204|Basidiomycota,3VE4H@5234|Tremellales	4751|Fungi	B	Component of the FACT complex, a general chromatin factor that acts to reorganize nucleosomes. The FACT complex is involved in multiple processes that require DNA as a template such as mRNA elongation, DNA replication and DNA repair. During transcription elongation the FACT complex acts as a histone chaperone that both destabilizes and restores nucleosomal structure. It facilitates the passage of…	POB3	GO:0000228,GO:0000785,GO:0000790,GO:0003674,GO:0003676,GO:0003677,GO:0005488,GO:0005575,GO:0005622,GO:0005623,GO:0005634,GO:0005654,GO:0005657,GO:0005694,GO:0006139,GO:0006259,GO:0006260,GO:0006261,GO:0006323,GO:0006325,GO:0006333,GO:0006334,GO:0006338,GO:0006342,GO:0006355,GO:0006357,GO:0006725,GO:0006807,GO:0006950,GO:0006996,GO:0007154,GO:0008023,GO:0008104,GO:0008150,GO:0008152,GO:0009058,GO:…	ko:K09272	NA	POB3_N,Rtt106,SSrecog	OTHER	1	0	NA	NA	NA	NA	NA	NA
357730	NA	By MS/MS	NA	By MS/MS	By MS/MS	By MS/MS	0	11192000	0	0	15044000	5299900	0	0	0	0	0	0	82508.K1WU53	0	920	COG1208@1|root,KOG1461@2759|Eukaryota,38EDP@33154|Opisthokonta,3NUFH@4751|Fungi,3UZTF@5204|Basidiomycota,3VEN8@5234|Tremellales	4751|Fungi	J	Bacterial transferase hexapeptide (six repeats)	GCD6	GO:0002181,GO:0002183,GO:0003674,GO:0003676,GO:0003723,GO:0003743,GO:0005085,GO:0005488,GO:0005515,GO:0005575,GO:0005622,GO:0005623,GO:0005737,GO:0005829,GO:0005851,GO:0006412,GO:0006413,GO:0006417,GO:0006446,GO:0006518,GO:0006807,GO:0008135,GO:0008150,GO:0008152,GO:0009058,GO:0009059,GO:0009889,GO:0009987,GO:0010467,GO:0010468,GO:0010556,GO:0010608,GO:0019222,GO:0019538,GO:0019899,GO:0031323,GO:…	ko:K03240	ko03013,map03013	Hexapep,Hexapep_2,NTP_transferase,W2	OTHER	1	0	NA	NA	NA	NA	NA	NA
357755	By matching	By matching	By MS/MS	NA	By MS/MS	By MS/MS	2641300	3401700	1857100	0	8740900	0	0	0	0	0	0	0	82508.K1WCI3	4.54e-218	626	COG0534@1|root,KOG1347@2759|Eukaryota,38BY6@33154|Opisthokonta,3NUM1@4751|Fungi,3UZ74@5204|Basidiomycota,3VDH6@5234|Tremellales	4751|Fungi	V	MatE	ERC1	GO:0003674,GO:0005215,GO:0005575,GO:0006556,GO:0006732,GO:0006790,GO:0006810,GO:0006855,GO:0008150,GO:0008152,GO:0009058,GO:0009108,GO:0009987,GO:0015238,GO:0015893,GO:0016020,GO:0016021,GO:0017144,GO:0022857,GO:0031224,GO:0042221,GO:0042493,GO:0042891,GO:0044237,GO:0044249,GO:0044272,GO:0044425,GO:0046500,GO:0050896,GO:0051179,GO:0051186,GO:0051188,GO:0051234,GO:0055085,GO:0071704,GO:1901576	ko:K03327	NA	MatE	OTHER	1	1e-06	NA	NA	NA	NA	NA	NA
357874	By MS/MS	By MS/MS	By MS/MS	By matching	By MS/MS	By matching	3776800	6100200	2236500	4829500	18867000	4141000	2197900	2168600	0	0	2352200	0	82508.K1VQU4	7.65e-238	677	COG0513@1|root,KOG0342@2759|Eukaryota,38E1A@33154|Opisthokonta,3NYNU@4751|Fungi,3UYM9@5204|Basidiomycota,3VGG6@5234|Tremellales	4751|Fungi	A	Type III restriction enzyme, res subunit	NA	GO:0000166,GO:0000959,GO:0000963,GO:0003674,GO:0003724,GO:0003824,GO:0004004,GO:0004386,GO:0005488,GO:0005524,GO:0005575,GO:0005622,GO:0005623,GO:0005634,GO:0005730,GO:0005737,GO:0005739,GO:0005759,GO:0006139,GO:0006396,GO:0006397,GO:0006725,GO:0006807,GO:0008026,GO:0008144,GO:0008150,GO:0008152,GO:0008186,GO:0009987,GO:0010467,GO:0010501,GO:0016070,GO:0016071,GO:0016462,GO:0016787,GO:0016817,GO:…	ko:K17679	NA	DEAD,Helicase_C	OTHER	1	4e-06	NA	NA	NA	NA	NA	NA
[truncated: 1,741 more rows]

## Sheet: Lig_NoCarb_DEqMS
Protein.IDs	LFQ.intensity.Lignin_S1	LFQ.intensity.Lignin_S2	LFQ.intensity.Lignin_S3	LFQ.intensity.NoCarbon_S1	LFQ.intensity.NoCarbon_S2	LFQ.intensity.NoCarbon_S3	logFC	sca.P.Value	sca.adj.pval	seed_ortholog	evalue	score	eggNOG_OGs	max_annot_lvl	COG_category	Description	Preferred_name	GOs	KEGG_ko	KEGG_Pathway	PFAMs	SP.Prediction	OTHER	SP.Sec.SPI.	CS.Position	cazy_class	cazy_family	cazy_subfamily	cupp_group	cupp_branch
[truncated: 1,158 more rows]

[truncated: 3 more sheets: Lig_Glucose_MaxQuantAll, Lig_Glucose_DEqMS, Lig_Glucose_DEP]
