# Supplementary material for: Exploring the Ligninolytic Capabilities of the Oleaginous Yeast Cutaneotrichosporon oleaginosum
Source: Research Square preprint supplement (doi:10.21203/rs.3.rs-6335743/v1), 2025-05-07
Supplement: Supplementary file 3 [file 933893b2203f929c7f1ec45d.xlsx]

## Sheet: Legend
Supplemental Dataset S2: MaxQuant and differential expression data used for cellular proteomics analyses (Main Text Figures 3–4 and SI Appendix Table 4, Figures S2–4)
Notes: Some proteins are duplicated in the datasets due to the fact that they belong to different CUPP (and by extension CAZy) families. These duplicates were only introduced after exporting and merging the final results from differential expression analyses.
Spreadsheet Contents:
LN_LG_MaxQuantAll	= Lignin, Glucose, and No Carbon MaxQuant Data Summary and Annotations
LN_LG_DEqMS	= Lignin vs. No Carbon and Lignin vs. Glucose Differential Expression Analysis Results using DEqMS (MaxQuant LFQ Intensities)
Lig_Glucose_DEP	= Lignin vs. Glucose Differential Expression Analysis Results using DEP (Raw Intensities, No Imputation)
Column Designations:
Protein.IDs	= JGI protein accession ID
Identification.type.XXXX	= Peptide identification either by MS/MS or matching (i.e., MaxQuant Match Between Runs; MBR)
Intensity.XXXX	= Raw intensity values (log2-transformed in DEP sheet)
LFQ.intensity.XXXX	= Label-free Quantification (LFQ) intensity values (log2-transformed in DEqMS sheets)
logFC	= log foldchanges according to DEqMS or DEP differential expression analyses
sca.P.Value	= DEqMS unadjusted p-value from differential expression analysis
sca.adj.pval	= DEqMS adjusted p-value from differential expression analysis
P.Value	= DEP unadjusted p-value from differential expression analysis
adj.pval	= DEP adjusted p-value from differential expression analysis
seed_ortholog	= Protein that matches query sequence and is used to identify Orthologous Groups (OG's), relationships, and annotations (specified as "txID.GenbankAccession" on NCBI")
evalue	= E-value for the seed_ortholog
score	= Score for the seed_ortholog
eggNOG_OGs	= A comma-separated, clade depth-sorted (broadest to narrowest), list of OG's identified for this query. Note that each OG is represented in the following format: OG@tax_id|tax_name
max_annot_lvl	= tax_id|tax_name of the level of widest OG used to retrieve orthologs for annotations
COG_category	= Clusters of Orthologous Genes (COG) category of the narrowest OG with a valid one
Description	= Description of the narrowest OG with a valid one
Preferred_name	= Common gene nomenclature
GOs	= List of Gene Ontology (GO) terms from transferred annotations
KEGG_ko	= Kyoto Encyclopedia of Genes and Genomes (KEGG) orthology terms
KEGG_Pathway	= KEGG pathway accessions
PFAMs	= Protein Family (PFAM) classifications
SP.Prediction	= SignalP 6.0 signal peptide prediction result
OTHER	= SignalP 6.0 "other" prediction score
SP.Sec.SPI.	= SignalP 6.0 "standard" secretory signal peptide prediction score
CS.Position	= Consensus Sequence Position
cazy_class	= Carbohydrate-Active Enzyme (CAZy) class
cazy_family	= CAZy family
cazy_subfamily	= CAZy subfamily
cupp_group	= Conserved Unique Peptied Patterns (CUPP) CAZy group
cupp_branch	= CUPP branch

## Sheet: LN_LG_MaxQuantAll
Protein.IDs	Identification.type.Lignin_S1	Identification.type.Lignin_S2	Identification.type.Lignin_S3	Identification.type.Lignin_S4	Identification.type.Glucose_S1	Identification.type.Glucose_S2	Identification.type.Glucose_S3	Identification.type.Glucose_S4	Identification.type.NoCarbon_S1	Identification.type.NoCarbon_S2	Identification.type.NoCarbon_S3	Identification.type.NoCarbon_S4	Intensity.Lignin_S1	Intensity.Lignin_S2	Intensity.Lignin_S3	Intensity.Lignin_S4	Intensity.Glucose_S1	Intensity.Glucose_S2	Intensity.Glucose_S3	Intensity.Glucose_S4	Intensity.NoCarbon_S1	Intensity.NoCarbon_S2	Intensity.NoCarbon_S3	Intensity.NoCarbon_S4	LFQ.intensity.Lignin_S1	LFQ.intensity.Lignin_S2	LFQ.intensity.Lignin_S3	LFQ.intensity.Lignin_S4	LFQ.intensity.Glucose_S1	LFQ.intensity.Glucose_S2	LFQ.intensity.Glucose_S3	LFQ.intensity.Glucose_S4	LFQ.intensity.NoCarbon_S1	LFQ.intensity.NoCarbon_S2	LFQ.intensity.NoCarbon_S3	LFQ.intensity.NoCarbon_S4	seed_ortholog	evalue	score	eggNOG_OGs	max_annot_lvl	COG_category	Description	Preferred_name	GOs	KEGG_ko	KEGG_Pathway	PFAMs	SP.Prediction
1000	By MS/MS	By MS/MS	By MS/MS	By matching	By MS/MS	By MS/MS	By MS/MS	By MS/MS	By MS/MS	By matching	By MS/MS	By matching	143310000	126950000	217720000	160450000	166200000	118030000	167560000	174730000	108620000	171720000	160410000	107090000	0	74027000	74409000	78589000	0	67933000	75927000	63459000	0	73343000	0	73674000	82508.K1VRS5	4.38e-266	785	KOG4162@1|root,KOG4162@2759|Eukaryota,39GYW@33154|Opisthokonta,3NXNR@4751|Fungi,3UYZX@5204|Basidiomycota,3VEER@5234|Tremellales	4751|Fungi	T	Filamentation protein	NA	GO:0005575,GO:0005623,GO:0005886,GO:0006810,GO:0006886,GO:0006897,GO:0008104,GO:0008150,GO:0015031,GO:0015833,GO:0016020,GO:0016192,GO:0032991,GO:0033036,GO:0034613,GO:0042886,GO:0044464,GO:0045184,GO:0046907,GO:0051179,GO:0051234,GO:0051641,GO:0051649,GO:0070727,GO:0071702,GO:0071705,GO:0071944,GO:0098657	ko:K21845	NA	TPR_8	OTHER
2126	By MS/MS	By MS/MS	By MS/MS	By MS/MS	By MS/MS	By MS/MS	By MS/MS	By MS/MS	By MS/MS	By MS/MS	By MS/MS	By MS/MS	306460000	303320000	608170000	535950000	1165800000	469050000	1268000000	975540000	391100000	628990000	487650000	482180000	172710000	147600000	354120000	329620000	350430000	158010000	455530000	388350000	220160000	376390000	231220000	230460000	5207.AAW46177	8.4e-228	641	COG2939@1|root,KOG1282@2759|Eukaryota,38FWP@33154|Opisthokonta,3NWF4@4751|Fungi,3V09D@5204|Basidiomycota,3VDA2@5234|Tremellales	4751|Fungi	O	Serine carboxypeptidase	NA	NA	ko:K13289	ko04142,ko04614,map04142,map04614	Peptidase_S10	OTHER
2220	By matching	By matching	By matching	By matching	By matching	By MS/MS	By matching	By matching	By matching	By matching	By matching	By matching	17506000	21106000	27777000	27037000	27402000	23473000	28710000	32402000	27366000	27962000	26808000	27603000	0	0	0	0	0	0	0	0	0	0	0	0	NA	NA	NA	NA	NA	NA	NA	NA	NA	NA	NA	NA	OTHER
4429	By MS/MS	By MS/MS	By MS/MS	By MS/MS	By MS/MS	By MS/MS	By MS/MS	By MS/MS	By MS/MS	By MS/MS	By MS/MS	By MS/MS	88042000	21203000	13797000	89330000	46904000	86999000	61215000	29987000	143960000	81301000	64014000	50124000	78649000	0	0	43679000	0	37468000	0	0	118670000	0	0	0	5207.AAW42534	2.68e-60	191	KOG4353@1|root,KOG4353@2759|Eukaryota,39ZX2@33154|Opisthokonta,3P6ZI@4751|Fungi,3V2FK@5204|Basidiomycota,3VG82@5234|Tremellales	4751|Fungi	A	Nuclear pore RNA shuttling protein Mtr2	NA	NA	ko:K14285	ko03008,ko03013,ko03015,ko05164,map03008,map03013,map03015,map05164	Mtr2,NTF2	OTHER
4443	NA	NA	By MS/MS	By matching	By MS/MS	By MS/MS	By MS/MS	By MS/MS	NA	By matching	By matching	By matching	0	0	58635000	18544000	200190000	197280000	179110000	223910000	0	25274000	29698000	17915000	0	0	26068000	19329000	49126000	86168000	107770000	118090000	0	20908000	21661000	0	82508.K1VRH6	1.05e-223	632	COG0654@1|root,KOG2614@2759|Eukaryota,38H32@33154|Opisthokonta,3NUXH@4751|Fungi,3UZ4X@5204|Basidiomycota,3VDV0@5234|Tremellales	4751|Fungi	C	Catalyzes the hydroxylation of L-kynurenine (L-Kyn) to form 3-hydroxy-L-kynurenine (L-3OHKyn). Required for synthesis of quinolinic acid	BNA4	GO:0000166,GO:0003674,GO:0003824,GO:0004497,GO:0004502,GO:0005488,GO:0005575,GO:0005622,GO:0005623,GO:0005737,GO:0005739,GO:0005740,GO:0005741,GO:0005886,GO:0006082,GO:0006139,GO:0006520,GO:0006568,GO:0006576,GO:0006586,GO:0006725,GO:0006732,GO:0006733,GO:0006753,GO:0006793,GO:0006796,GO:0006807,GO:0006950,GO:0007154,GO:0008150,GO:0008152,GO:0009058,GO:0009072,GO:0009108,GO:0009117,GO:0009165,GO:…	ko:K00486	ko00380,ko01100,map00380,map01100	FAD_binding_3	OTHER
4927	By MS/MS	By MS/MS	By matching	By matching	NA	By matching	NA	NA	By MS/MS	By matching	By matching	NA	635570000	961110000	665520000	576850000	0	80445000	0	0	703040000	585750000	722290000	0	0	0	0	0	0	0	0	0	0	0	0	0	140110.NechaP38734	3.05e-201	583	2CNP2@1|root,2QXAC@2759|Eukaryota,38DBP@33154|Opisthokonta,3NWG3@4751|Fungi,3QJFU@4890|Ascomycota,21710@147550|Sordariomycetes,3TFIC@5125|Hypocreales,1FPU4@110618|Nectriaceae	4751|Fungi	S	SET (Su(var)3-9, Enhancer-of-zeste, Trithorax) domain	NA	NA	NA	NA	SET	OTHER
5593	By matching	By matching	By MS/MS	NA	By MS/MS	By MS/MS	By matching	By MS/MS	By MS/MS	By matching	By matching	By matching	63054000	56837000	69581000	0	56985000	84043000	81530000	65948000	73147000	86909000	52296000	63608000	0	0	0	0	0	0	0	0	0	0	0	0	82508.K1VQ16	1.04e-114	351	KOG2918@1|root,KOG2918@2759|Eukaryota,38FIG@33154|Opisthokonta,3NUP8@4751|Fungi,3V0UU@5204|Basidiomycota,3VF08@5234|Tremellales	4751|Fungi	H	Leucine carboxyl methyltransferase	PPM1	GO:0003674,GO:0003824,GO:0003880,GO:0005575,GO:0005622,GO:0005623,GO:0005737,GO:0005829,GO:0006464,GO:0006479,GO:0006481,GO:0006807,GO:0008150,GO:0008152,GO:0008168,GO:0008171,GO:0008213,GO:0008276,GO:0008757,GO:0009894,GO:0009987,GO:0010340,GO:0010506,GO:0016740,GO:0016741,GO:0018410,GO:0018423,GO:0019222,GO:0019538,GO:0031323,GO:0031329,GO:0032259,GO:0036211,GO:0043170,GO:0043412,GO:0043414,GO:…	ko:K18203	NA	LCM	OTHER
6762	By MS/MS	By MS/MS	By MS/MS	By MS/MS	By MS/MS	By MS/MS	By MS/MS	By MS/MS	By MS/MS	By MS/MS	By MS/MS	By MS/MS	165050000	263720000	229890000	292400000	380030000	339670000	477270000	381870000	328500000	371460000	444680000	495350000	77645000	81452000	70601000	73203000	78150000	77570000	77145000	70033000	89552000	86566000	75501000	92240000	82508.K1VZ30	0	1045	KOG4197@1|root,KOG4197@2759|Eukaryota,38BX0@33154|Opisthokonta,3NXQT@4751|Fungi,3UYXR@5204|Basidiomycota,3VCWF@5234|Tremellales	4751|Fungi	S	Pentacotripeptide-repeat region of PRORP	NA	GO:0003674,GO:0003676,GO:0003723,GO:0003824,GO:0004518,GO:0004519,GO:0005488,GO:0005575,GO:0005622,GO:0005623,GO:0005737,GO:0005739,GO:0005740,GO:0006139,GO:0006725,GO:0006807,GO:0008150,GO:0008152,GO:0009451,GO:0009987,GO:0010467,GO:0016020,GO:0016021,GO:0016070,GO:0016787,GO:0016788,GO:0031090,GO:0031224,GO:0031300,GO:0031301,GO:0031966,GO:0031967,GO:0031975,GO:0032592,GO:0034641,GO:0043170,GO:…	NA	NA	PPR,PPR_2,PPR_3	OTHER
7276	By MS/MS	By MS/MS	By MS/MS	By MS/MS	By MS/MS	By MS/MS	By MS/MS	By MS/MS	By MS/MS	By MS/MS	By MS/MS	By MS/MS	170990000	175930000	194990000	177960000	289410000	246700000	267970000	321480000	222510000	242880000	254490000	212620000	88096000	99581000	90592000	96148000	113540000	124530000	100410000	113820000	108720000	103670000	105560000	93284000	82508.K1VXA8	1.87e-190	540	COG0639@1|root,KOG0376@2759|Eukaryota,38E0Z@33154|Opisthokonta,3NU3F@4751|Fungi,3UYCR@5204|Basidiomycota,3VG9F@5234|Tremellales	4751|Fungi	T	serine threonine-protein phosphatase	PPT1	GO:0003674,GO:0003824,GO:0004721,GO:0004722,GO:0005575,GO:0005622,GO:0005623,GO:0005634,GO:0005737,GO:0006464,GO:0006470,GO:0006793,GO:0006796,GO:0006807,GO:0007154,GO:0007165,GO:0008150,GO:0008152,GO:0009987,GO:0016311,GO:0016787,GO:0016788,GO:0016791,GO:0019538,GO:0023052,GO:0036211,GO:0042578,GO:0043170,GO:0043226,GO:0043227,GO:0043229,GO:0043231,GO:0043412,GO:0044237,GO:0044238,GO:0044260,GO:…	ko:K04460	ko04010,map04010	Metallophos,PPP5,TPR_1,TPR_11,TPR_8	OTHER
7498	NA	NA	NA	By matching	By MS/MS	By matching	By MS/MS	By MS/MS	By MS/MS	By MS/MS	NA	By MS/MS	0	0	0	25623000	60833000	50029000	55542000	58766000	18381000	26491000	0	24659000	0	0	0	0	31581000	29938000	31304000	28052000	0	0	0	0	552467.XP_003192523.1	2.98e-193	570	KOG2568@1|root,KOG2568@2759|Eukaryota,38HGW@33154|Opisthokonta,3NXD6@4751|Fungi,3UZY8@5204|Basidiomycota,3VDZD@5234|Tremellales	4751|Fungi	S	Lung seven transmembrane receptor	NA	GO:0003674,GO:0005575,GO:0005623,GO:0005886,GO:0005887,GO:0007154,GO:0007165,GO:0007166,GO:0008150,GO:0009987,GO:0016020,GO:0016021,GO:0023052,GO:0031224,GO:0031226,GO:0038023,GO:0044425,GO:0044459,GO:0044464,GO:0050789,GO:0050794,GO:0050896,GO:0051716,GO:0060089,GO:0065007,GO:0071944	NA	NA	Lung_7-TM_R	SP
8874	NA	NA	NA	NA	NA	By MS/MS	NA	NA	NA	NA	NA	NA	0	0	0	0	0	4409700	0	0	0	0	0	0	0	0	0	0	0	0	0	0	0	0	0	0	5217.XP_007006935.1	3.09e-66	215	2EQKY@1|root,2STKC@2759|Eukaryota,3APS6@33154|Opisthokonta,3PGES@4751|Fungi,3V6E0@5204|Basidiomycota,3VGCW@5234|Tremellales	4751|Fungi	-	-	NA	NA	NA	NA	-	SP
9141	By MS/MS	By MS/MS	By MS/MS	By MS/MS	By MS/MS	By MS/MS	By MS/MS	By MS/MS	By MS/MS	By MS/MS	By MS/MS	By MS/MS	2345100000	2092900000	2857000000	2883500000	2393000000	1455900000	2435200000	2973700000	2197900000	2660700000	2456300000	3049200000	0	0	0	0	1410900000	1792100000	1602000000	1637000000	0	0	0	0	552467.XP_003193159.1	0	1501	COG0590@1|root,KOG1018@2759|Eukaryota,39KKV@33154|Opisthokonta,3Q504@4751|Fungi,3VCAU@5204|Basidiomycota,3VGRS@5234|Tremellales	4751|Fungi	F	deaminase activity	NA	NA	NA	NA	-	OTHER
9779	By MS/MS	By matching	By MS/MS	By MS/MS	By MS/MS	By MS/MS	By MS/MS	By MS/MS	By matching	By matching	By matching	By MS/MS	114620000	17701000	128700000	116910000	181260000	147050000	49769000	56253000	12853000	26596000	22118000	44400000	79229000	0	77107000	81704000	109790000	106430000	0	0	0	0	0	0	82508.K1VT76	2.09e-23	102	KOG1702@1|root,KOG1702@2759|Eukaryota	2759|Eukaryota	S	actin binding	NRAP	GO:0003008,GO:0003012,GO:0003674,GO:0003779,GO:0005198,GO:0005488,GO:0005515,GO:0005575,GO:0005622,GO:0005623,GO:0005737,GO:0005829,GO:0005856,GO:0005911,GO:0005912,GO:0005913,GO:0005916,GO:0005924,GO:0005927,GO:0006928,GO:0006936,GO:0006996,GO:0007010,GO:0007275,GO:0007517,GO:0007525,GO:0008092,GO:0008150,GO:0008307,GO:0009987,GO:0014704,GO:0015629,GO:0016043,GO:0017166,GO:0030016,GO:0030017,GO:…	ko:K03234,ko:K18267	ko04152,ko04921,map04152,map04921	LIM,Nebulin,SH3_9	OTHER
11281	NA	NA	By matching	NA	NA	By MS/MS	NA	By matching	By matching	NA	NA	By matching	0	0	34370000	0	0	96052000	0	57569000	13345000	0	0	67305000	0	0	0	0	0	0	0	0	0	0	0	0	5217.XP_007006950.1	1.85e-17	89.4	KOG4325@1|root,KOG4325@2759|Eukaryota,3A96F@33154|Opisthokonta,3P7Z3@4751|Fungi,3V7WA@5204|Basidiomycota,3VHCN@5234|Tremellales	4751|Fungi	S	Mago binding	NA	NA	ko:K14294	ko03013,ko03015,map03013,map03015	Mago-bind	OTHER
16977	By MS/MS	By MS/MS	By MS/MS	By matching	By matching	By MS/MS	By MS/MS	By MS/MS	By matching	By MS/MS	By matching	By MS/MS	106450000	120790000	250660000	135060000	264800000	198510000	251170000	266450000	113710000	109380000	120500000	111280000	105200000	113550000	113350000	0	96950000	80399000	87603000	76250000	0	106210000	0	111430000	5286.M7XG56	1.47e-99	306	COG0665@1|root,KOG3923@2759|Eukaryota,39SQP@33154|Opisthokonta,3NXYK@4751|Fungi,3V0SY@5204|Basidiomycota,2YFQW@29000|Pucciniomycotina	4751|Fungi	E	FAD dependent oxidoreductase	NA	NA	ko:K00273	ko00260,ko00311,ko00330,ko00472,ko01100,ko01130,ko04146,map00260,map00311,map00330,map00472,map01100,map01130,map04146	DAO	OTHER
17049	NA	By matching	By matching	By MS/MS	NA	NA	By matching	NA	NA	By MS/MS	NA	NA	0	97641000	13158000	29201000	0	0	10153000	0	0	105200000	0	0	0	0	0	0	0	0	0	0	0	0	0	0	82508.K1W395	7.17e-25	112	2CYZD@1|root,2S7E6@2759|Eukaryota,3AA62@33154|Opisthokonta,3P806@4751|Fungi,3V2P4@5204|Basidiomycota,3VG38@5234|Tremellales	4751|Fungi	-	-	NA	NA	NA	NA	-	OTHER
17690	By MS/MS	By MS/MS	By MS/MS	By MS/MS	By MS/MS	By MS/MS	By MS/MS	By MS/MS	By matching	By MS/MS	By MS/MS	By matching	179980000	171720000	154670000	153320000	248230000	127400000	220800000	206700000	125440000	160960000	180460000	88097000	94275000	76384000	72950000	84194000	77162000	58889000	77744000	59584000	63901000	76048000	76792000	0	82508.K1VC19	8.91e-126	380	KOG1721@1|root,KOG1721@2759|Eukaryota,3A8DQ@33154|Opisthokonta,3P6MW@4751|Fungi,3V26I@5204|Basidiomycota,3VFV9@5234|Tremellales	4751|Fungi	S	Zinc finger, C2H2 type	NRG1	GO:0000003,GO:0000122,GO:0000429,GO:0000430,GO:0000433,GO:0000976,GO:0000977,GO:0000978,GO:0000981,GO:0000982,GO:0000987,GO:0000988,GO:0000989,GO:0001012,GO:0001067,GO:0001076,GO:0001078,GO:0001085,GO:0001103,GO:0001191,GO:0001227,GO:0001410,GO:0002831,GO:0002832,GO:0003674,GO:0003676,GO:0003677,GO:0003690,GO:0003700,GO:0005488,GO:0005515,GO:0005575,GO:0005622,GO:0005623,GO:0005634,GO:0006355,GO:…	ko:K09467	NA	zf-C2H2	OTHER
18584	By MS/MS	By MS/MS	By MS/MS	By matching	By MS/MS	By MS/MS	By MS/MS	By MS/MS	By MS/MS	By MS/MS	By MS/MS	By MS/MS	38843000	23022000	15237000	8983300	4613700	11632000	4780500	27176000	5844300	75402000	31360000	36625000	16431000	14780000	30876000	0	0	9415200	0	9132700	0	22314000	31204000	24079000	82508.K1VQK6	2.46e-117	385	2BYRP@1|root,2SAS5@2759|Eukaryota,39VR6@33154|Opisthokonta,3NYUX@4751|Fungi,3V33G@5204|Basidiomycota,3VGIJ@5234|Tremellales	4751|Fungi	S	Fungal protein of unknown function (DUF1752)	NA	GO:0000122,GO:0005575,GO:0005622,GO:0005623,GO:0005737,GO:0006355,GO:0006357,GO:0006808,GO:0007154,GO:0007165,GO:0008150,GO:0009889,GO:0009890,GO:0009892,GO:0009987,GO:0010468,GO:0010556,GO:0010558,GO:0010605,GO:0010629,GO:0019219,GO:0019222,GO:0023052,GO:0031323,GO:0031324,GO:0031326,GO:0031327,GO:0031930,GO:0044424,GO:0044464,GO:0045892,GO:0045934,GO:0048519,GO:0048523,GO:0050789,GO:0050794,GO:…	NA	NA	DUF1752,DUF3295	OTHER
19581	By MS/MS	By matching	By matching	By MS/MS	By matching	NA	NA	NA	By MS/MS	By MS/MS	By MS/MS	By MS/MS	59316000	100790000	46538000	52129000	10641000	0	0	0	151690000	107160000	123830000	121040000	0	0	0	0	0	0	0	0	0	0	79655000	71495000	NA	NA	NA	NA	NA	NA	NA	NA	NA	NA	NA	NA	OTHER
20061	NA	By matching	NA	By matching	By matching	By MS/MS	By matching	By MS/MS	By MS/MS	NA	NA	NA	0	10711000	0	11390000	23782000	23263000	16142000	19785000	12192000	0	0	0	0	0	0	0	0	0	0	0	0	0	0	0	NA	NA	NA	NA	NA	NA	NA	NA	NA	NA	NA	NA	OTHER
21015	By MS/MS	By MS/MS	By MS/MS	By MS/MS	By MS/MS	By MS/MS	By MS/MS	By MS/MS	By MS/MS	By MS/MS	By MS/MS	By MS/MS	1168200000	1229500000	2149300000	1146800000	1814200000	1141600000	1796500000	2207600000	1232000000	1539400000	2440200000	1713800000	351270000	382080000	458410000	368270000	428120000	322140000	377340000	351390000	463060000	462910000	497650000	490310000	82508.K1VK01	1.2e-192	548	COG1482@1|root,KOG2757@2759|Eukaryota,38C6R@33154|Opisthokonta,3NVQ2@4751|Fungi,3UZ5D@5204|Basidiomycota,3VD9N@5234|Tremellales	4751|Fungi	G	Mannose-6-phosphate isomerase	PMI1	GO:0000032,GO:0003674,GO:0003824,GO:0004476,GO:0005575,GO:0005622,GO:0005623,GO:0005634,GO:0005737,GO:0005975,GO:0005996,GO:0006013,GO:0006056,GO:0006057,GO:0006139,GO:0006464,GO:0006486,GO:0006725,GO:0006807,GO:0008150,GO:0008152,GO:0009058,GO:0009059,GO:0009100,GO:0009101,GO:0009225,GO:0009226,GO:0009298,GO:0009987,GO:0016043,GO:0016853,GO:0016860,GO:0016861,GO:0018130,GO:0019318,GO:0019438,GO:…	ko:K01809	ko00051,ko00520,ko01100,ko01110,ko01130,map00051,map00520,map01100,map01110,map01130	PMI_typeI	OTHER
21195	By matching	By matching	By matching	By MS/MS	By MS/MS	By MS/MS	By MS/MS	By MS/MS	By MS/MS	By matching	By MS/MS	By MS/MS	127670000	222510000	153520000	189800000	237590000	162040000	242680000	190450000	257100000	263180000	255390000	258560000	69524000	114730000	0	108490000	100260000	98217000	89820000	0	124310000	107850000	112840000	116100000	552467.XP_003195047.1	2.95e-50	168	COG0666@1|root,KOG0504@2759|Eukaryota,3A8BU@33154|Opisthokonta,3P7TZ@4751|Fungi,3V225@5204|Basidiomycota,3VFJ3@5234|Tremellales	4751|Fungi	S	Cytoplasm protein	YAR1	GO:0000054,GO:0000056,GO:0003674,GO:0005488,GO:0005515,GO:0005575,GO:0005622,GO:0005623,GO:0005634,GO:0005737,GO:0006403,GO:0006405,GO:0006611,GO:0006810,GO:0006886,GO:0006913,GO:0006950,GO:0006970,GO:0006979,GO:0008104,GO:0008150,GO:0009628,GO:0009987,GO:0015031,GO:0015833,GO:0015931,GO:0022613,GO:0030684,GO:0030688,GO:0031503,GO:0032879,GO:0032880,GO:0032991,GO:0033036,GO:0033554,GO:0033750,GO:…	ko:K06867	NA	Ank_2,Ank_3,Ank_4,Ank_5	OTHER
22424	By MS/MS	By MS/MS	By MS/MS	By matching	By MS/MS	By MS/MS	By MS/MS	By MS/MS	By MS/MS	By MS/MS	By MS/MS	By matching	320040000	284040000	100480000	126520000	350800000	270960000	262960000	334350000	211760000	275690000	341080000	159340000	134680000	101180000	0	122860000	139320000	129740000	124200000	127800000	109660000	121860000	118820000	85898000	82508.K1VKW3	0	3590	KOG1826@1|root,KOG1826@2759|Eukaryota,38EMB@33154|Opisthokonta,3NX3S@4751|Fungi,3V066@5204|Basidiomycota,3VD0K@5234|Tremellales	4751|Fungi	V	GTPase-activator protein for Ras-like GTPases	IRA2	GO:0000302,GO:0003674,GO:0005096,GO:0005575,GO:0005622,GO:0005623,GO:0005737,GO:0005739,GO:0005783,GO:0005789,GO:0005829,GO:0005886,GO:0006950,GO:0006979,GO:0008047,GO:0008150,GO:0009266,GO:0009409,GO:0009628,GO:0009636,GO:0009898,GO:0009966,GO:0009968,GO:0009987,GO:0010035,GO:0010038,GO:0010646,GO:0010648,GO:0012505,GO:0016020,GO:0016021,GO:0023051,GO:0023057,GO:0030234,GO:0030695,GO:0031224,GO:…	ko:K08052	ko01521,ko04010,ko04014,map01521,map04010,map04014	CRAL_TRIO_2,RasGAP	OTHER
22572	By matching	By MS/MS	By matching	By matching	By MS/MS	By matching	By MS/MS	By MS/MS	By MS/MS	By MS/MS	By MS/MS	By MS/MS	39810000	59400000	81702000	25931000	173810000	21304000	159850000	168250000	97407000	56166000	77957000	79120000	0	36896000	40633000	0	35571000	0	41346000	40161000	36303000	29562000	32595000	39534000	984962.XP_009545848.1	1.05e-13	68.9	KOG4620@1|root,KOG4620@2759|Eukaryota,3A8HH@33154|Opisthokonta,3P6N8@4751|Fungi,3V2Y3@5204|Basidiomycota,22AEP@155619|Agaricomycetes,3H5ZB@355688|Agaricomycetes incertae sedis	4751|Fungi	S	Complex 1 protein (LYR family)	NA	GO:0005575,GO:0005622,GO:0005623,GO:0005737,GO:0005739,GO:0005759,GO:0006996,GO:0007005,GO:0008150,GO:0009987,GO:0016043,GO:0022607,GO:0031974,GO:0033108,GO:0034552,GO:0034553,GO:0034622,GO:0043226,GO:0043227,GO:0043229,GO:0043231,GO:0043233,GO:0043933,GO:0044085,GO:0044422,GO:0044424,GO:0044429,GO:0044444,GO:0044446,GO:0044464,GO:0065003,GO:0070013,GO:0071840	ko:K18167	NA	Complex1_LYR	OTHER
25480	By MS/MS	By MS/MS	By MS/MS	By MS/MS	By MS/MS	By MS/MS	By MS/MS	By matching	NA	By MS/MS	By MS/MS	By MS/MS	18103000	21326000	23618000	23887000	27828000	16997000	20639000	17140000	0	31654000	22289000	27792000	0	0	20702000	23051000	11965000	0	0	0	0	25875000	18312000	23097000	82508.K1VJ88	4.67e-168	542	2CSI1@1|root,2RC08@2759|Eukaryota,38DA5@33154|Opisthokonta,3NY5P@4751|Fungi,3UZT0@5204|Basidiomycota,3VCRC@5234|Tremellales	4751|Fungi	S	Activator of mitotic machinery Cdc14 phosphatase activation C-term	NA	GO:0000003,GO:0000183,GO:0000935,GO:0001302,GO:0003006,GO:0003674,GO:0004857,GO:0004864,GO:0005575,GO:0005622,GO:0005623,GO:0005634,GO:0005737,GO:0005933,GO:0005934,GO:0005935,GO:0005938,GO:0006325,GO:0006342,GO:0006355,GO:0006996,GO:0007049,GO:0007154,GO:0007163,GO:0007165,GO:0007346,GO:0007568,GO:0007569,GO:0008150,GO:0009653,GO:0009889,GO:0009890,GO:0009892,GO:0009987,GO:0010035,GO:0010038,GO:…	ko:K18626	NA	Zds_C	OTHER
26337	By MS/MS	By MS/MS	By matching	By MS/MS	By matching	By MS/MS	By MS/MS	By matching	By matching	By matching	By matching	By matching	61964000	30170000	41009000	18890000	43838000	28137000	31357000	43848000	47703000	59906000	33903000	35913000	0	0	0	0	0	0	0	0	0	0	0	0	NA	NA	NA	NA	NA	NA	NA	NA	NA	NA	NA	NA	OTHER
27471	By MS/MS	By matching	By MS/MS	By matching	NA	NA	NA	NA	NA	By matching	By matching	NA	27788000	12398000	33030000	35363000	0	0	0	0	0	24939000	28788000	0	0	0	0	0	0	0	0	0	0	0	0	0	82508.K1VJT4	9.93e-224	669	KOG2109@1|root,KOG2109@2759|Eukaryota,38DI8@33154|Opisthokonta,3P6KB@4751|Fungi,3V1WD@5204|Basidiomycota,3VGKP@5234|Tremellales	4751|Fungi	S	acetyltransferase activator activity	NA	NA	NA	NA	-	OTHER
28123	By MS/MS	By matching	By MS/MS	By MS/MS	By MS/MS	By MS/MS	By MS/MS	By MS/MS	By MS/MS	By MS/MS	By matching	By MS/MS	205050000	86110000	59129000	111040000	209130000	209950000	255130000	257520000	223230000	203660000	184510000	200550000	76626000	64422000	44501000	52586000	59474000	70447000	79461000	77642000	74457000	99559000	69664000	98902000	82508.K1VKE2	0	932	KOG1009@1|root,KOG1009@2759|Eukaryota,38ZUE@33154|Opisthokonta,3NXAC@4751|Fungi,3UZX1@5204|Basidiomycota,3VE79@5234|Tremellales	4751|Fungi	BL	Anaphase-promoting complex subunit 4 WD40 domain	CAC2	GO:0000228,GO:0000278,GO:0000775,GO:0003674,GO:0005488,GO:0005515,GO:0005575,GO:0005622,GO:0005623,GO:0005634,GO:0005657,GO:0005694,GO:0005737,GO:0005829,GO:0006139,GO:0006259,GO:0006260,GO:0006261,GO:0006323,GO:0006325,GO:0006333,GO:0006334,GO:0006335,GO:0006338,GO:0006725,GO:0006807,GO:0006996,GO:0007049,GO:0008150,GO:0008152,GO:0009058,GO:0009059,GO:0009987,GO:0016043,GO:0022402,GO:0022607,GO:…	ko:K10751	NA	WD40	OTHER
29190	By MS/MS	By MS/MS	By MS/MS	By MS/MS	By MS/MS	By MS/MS	By MS/MS	By MS/MS	By MS/MS	By MS/MS	By MS/MS	By MS/MS	734130000	598180000	1011600000	943500000	2561800000	2209400000	2432700000	2914200000	1104400000	1287600000	1324500000	1064000000	333450000	286740000	284980000	291860000	566870000	673620000	489210000	565830000	333230000	350080000	289500000	246310000	NA	NA	NA	NA	NA	NA	NA	NA	NA	NA	NA	NA	OTHER
30290	By MS/MS	By MS/MS	By MS/MS	By MS/MS	By MS/MS	By MS/MS	By MS/MS	By MS/MS	By MS/MS	By MS/MS	By MS/MS	By MS/MS	87579000	128230000	272160000	20971000	255790000	71883000	163260000	426560000	96642000	140460000	95801000	69593000	0	0	146970000	0	175880000	0	0	217340000	0	0	0	0	82508.K1WG40	1.01e-121	348	COG1100@1|root,KOG0071@2759|Eukaryota,38I0U@33154|Opisthokonta,3NYP1@4751|Fungi,3UZ4F@5204|Basidiomycota,3VDJE@5234|Tremellales	4751|Fungi	U	Belongs to the small GTPase superfamily. Arf family	NA	GO:0000139,GO:0000166,GO:0000278,GO:0000281,GO:0000282,GO:0000910,GO:0000935,GO:0001558,GO:0001882,GO:0001883,GO:0003674,GO:0003676,GO:0003723,GO:0003729,GO:0003824,GO:0003924,GO:0005488,GO:0005525,GO:0005575,GO:0005622,GO:0005623,GO:0005737,GO:0005794,GO:0005829,GO:0005933,GO:0005934,GO:0005935,GO:0005938,GO:0006810,GO:0006886,GO:0006888,GO:0006897,GO:0006996,GO:0007010,GO:0007015,GO:0007049,GO:…	ko:K07941	ko04014,ko04072,ko04144,ko04666,map04014,map04072,map04144,map04666	Arf	OTHER
30929	By MS/MS	By MS/MS	By MS/MS	By MS/MS	By MS/MS	By MS/MS	By MS/MS	By MS/MS	By MS/MS	By MS/MS	By MS/MS	By MS/MS	314030000	270590000	730560000	471290000	225030000	128780000	202280000	237920000	542720000	595610000	642880000	785780000	264250000	231260000	235090000	307250000	141580000	87616000	201470000	142090000	316250000	277470000	322800000	370340000	82508.K1VA22	0	1753	COG2114@1|root,KOG0618@2759|Eukaryota,38GSJ@33154|Opisthokonta,3NUNK@4751|Fungi,3UYAE@5204|Basidiomycota,3VD42@5234|Tremellales	4751|Fungi	T	Adenylate cyclase	CYR1	GO:0000429,GO:0000430,GO:0000433,GO:0001678,GO:0003674,GO:0003824,GO:0004016,GO:0005488,GO:0005575,GO:0005622,GO:0005623,GO:0005737,GO:0005739,GO:0005783,GO:0005789,GO:0005829,GO:0005886,GO:0006139,GO:0006163,GO:0006164,GO:0006171,GO:0006355,GO:0006357,GO:0006725,GO:0006753,GO:0006793,GO:0006796,GO:0006807,GO:0007154,GO:0007165,GO:0007186,GO:0007187,GO:0007188,GO:0007189,GO:0007264,GO:0007265,GO:…	ko:K01768	ko00230,ko02025,ko04113,ko04213,map00230,map02025,map04113,map04213	Ad_cyc_g-alpha,Guanylate_cyc,LRR_8,PP2C	OTHER
31239	By MS/MS	By MS/MS	By MS/MS	By MS/MS	By MS/MS	By MS/MS	By MS/MS	By MS/MS	By MS/MS	By MS/MS	By matching	By MS/MS	242370000	282540000	281290000	281520000	291580000	423630000	227460000	346760000	134120000	19569000	65848000	153240000	114110000	113400000	125300000	89960000	96883000	256900000	83694000	100630000	73010000	0	0	75729000	82508.K1VKT2	3.71e-129	388	COG3268@1|root,KOG2733@2759|Eukaryota,38D2K@33154|Opisthokonta,3NWT8@4751|Fungi,3V03E@5204|Basidiomycota,3VEX0@5234|Tremellales	4751|Fungi	S	Saccharopine dehydrogenase NADP binding domain	NA	NA	NA	NA	Sacchrp_dh_NADP	OTHER
32106	By matching	By matching	By MS/MS	By MS/MS	By MS/MS	By MS/MS	By MS/MS	By MS/MS	By MS/MS	By matching	By matching	By matching	96287000	144580000	116970000	105210000	220870000	206800000	252970000	294790000	108530000	97600000	77943000	36256000	40059000	55088000	56397000	61344000	45272000	61668000	75322000	52353000	38574000	35360000	36889000	23897000	552467.XP_003191582.1	8.08e-64	199	KOG3142@1|root,KOG3142@2759|Eukaryota,39ZTR@33154|Opisthokonta,3P2BT@4751|Fungi,3V0WQ@5204|Basidiomycota,3VGXK@5234|Tremellales	4751|Fungi	U	PRA1 family protein	YIP3	GO:0003674,GO:0005488,GO:0005515,GO:0005575,GO:0005622,GO:0005623,GO:0005737,GO:0005783,GO:0005794,GO:0005798,GO:0006810,GO:0006888,GO:0008150,GO:0012505,GO:0016192,GO:0017016,GO:0017137,GO:0019899,GO:0030134,GO:0030135,GO:0031267,GO:0031410,GO:0031982,GO:0043226,GO:0043227,GO:0043229,GO:0043231,GO:0044424,GO:0044444,GO:0044464,GO:0046907,GO:0048193,GO:0051020,GO:0051179,GO:0051234,GO:0051641,GO:…	ko:K20359	NA	PRA1	OTHER
32951	By MS/MS	By MS/MS	By MS/MS	By MS/MS	By MS/MS	By MS/MS	By MS/MS	By MS/MS	By MS/MS	By MS/MS	By MS/MS	By MS/MS	309810000	437980000	810740000	606270000	374550000	609450000	469310000	582800000	261590000	639020000	309880000	249190000	188240000	193010000	190600000	190230000	175810000	189320000	166380000	161480000	176050000	165770000	152010000	154300000	82508.K1VE46	0	1548	KOG2208@1|root,KOG2208@2759|Eukaryota,38GK3@33154|Opisthokonta,3NVGC@4751|Fungi,3UYSZ@5204|Basidiomycota,3VDZ1@5234|Tremellales	4751|Fungi	I	K homology RNA-binding domain	NA	GO:0003674,GO:0003676,GO:0003723,GO:0003729,GO:0005488,GO:0005575,GO:0005622,GO:0005623,GO:0005737,GO:0044424,GO:0044464,GO:0097159,GO:1901363	NA	NA	KH_1	OTHER
35432	By MS/MS	By MS/MS	By MS/MS	By MS/MS	By MS/MS	By MS/MS	By MS/MS	By MS/MS	By MS/MS	By MS/MS	By MS/MS	By MS/MS	633720000	836150000	891200000	759210000	597520000	422620000	229960000	511240000	421600000	546140000	735290000	787190000	306860000	360420000	356510000	365280000	106720000	110430000	85166000	109110000	197790000	242230000	232850000	259110000	710696.Intca_0332	2.99e-139	401	COG3386@1|root,COG3386@2|Bacteria,2GNV1@201174|Actinobacteria,4FGI6@85021|Intrasporangiaceae	201174|Actinobacteria	G	SMP-30/Gluconolaconase/LRE-like region	NA	NA	NA	NA	SGL	OTHER
35883	By MS/MS	By MS/MS	By MS/MS	By matching	By MS/MS	By MS/MS	By MS/MS	By MS/MS	By MS/MS	By MS/MS	By MS/MS	By MS/MS	105340000	111150000	112580000	85885000	124400000	96559000	120190000	132640000	105600000	112420000	124350000	112440000	59231000	54491000	48417000	47870000	50576000	50299000	53162000	49577000	56581000	54558000	54361000	55770000	82508.K1VHI2	3.99e-186	542	KOG2071@1|root,KOG2071@2759|Eukaryota,38EY0@33154|Opisthokonta,3NXC6@4751|Fungi,3V0DI@5204|Basidiomycota,3VE18@5234|Tremellales	4751|Fungi	A	cleavage polyadenylation specificity factor	PCF11	GO:0000993,GO:0001098,GO:0001099,GO:0003674,GO:0003676,GO:0003723,GO:0003729,GO:0005488,GO:0005515,GO:0005575,GO:0005622,GO:0005623,GO:0005634,GO:0005654,GO:0005737,GO:0005829,GO:0005849,GO:0006139,GO:0006351,GO:0006353,GO:0006366,GO:0006369,GO:0006378,GO:0006379,GO:0006396,GO:0006397,GO:0006725,GO:0006807,GO:0008150,GO:0008152,GO:0009058,GO:0009059,GO:0009987,GO:0010467,GO:0016070,GO:0016071,GO:…	ko:K07478,ko:K14400	ko03015,map03015	CFIA_Pcf11,CTD_bind	OTHER
37271	By matching	By MS/MS	By MS/MS	By matching	By MS/MS	By MS/MS	By MS/MS	By MS/MS	By MS/MS	By MS/MS	By MS/MS	By matching	62246000	49689000	60380000	52580000	90805000	67689000	74122000	86306000	63154000	51633000	73887000	44833000	0	0	0	0	0	0	0	0	0	0	0	0	NA	NA	NA	NA	NA	NA	NA	NA	NA	NA	NA	NA	OTHER
38136	By matching	By matching	By matching	By matching	By matching	By matching	By MS/MS	By MS/MS	By matching	By matching	By matching	By MS/MS	68296000	77764000	97986000	61609000	81271000	24797000	32325000	134000000	78378000	80007000	87323000	58640000	0	0	0	0	0	0	0	0	0	0	0	0	5217.XP_007002298.1	4.81e-96	284	KOG0092@1|root,KOG0092@2759|Eukaryota,38HB3@33154|Opisthokonta,3NVI3@4751|Fungi,3V08U@5204|Basidiomycota,3VEV5@5234|Tremellales	4751|Fungi	U	Ras of Complex, Roc, domain of DAPkinase	YPT52	GO:0000166,GO:0000322,GO:0000323,GO:0000324,GO:0000329,GO:0001882,GO:0001883,GO:0003674,GO:0003824,GO:0003924,GO:0005488,GO:0005525,GO:0005575,GO:0005622,GO:0005623,GO:0005737,GO:0005768,GO:0005769,GO:0005770,GO:0005773,GO:0005774,GO:0006605,GO:0006623,GO:0006810,GO:0006886,GO:0006892,GO:0006895,GO:0006897,GO:0006906,GO:0006996,GO:0007032,GO:0007034,GO:0007154,GO:0007165,GO:0007264,GO:0008104,GO:…	ko:K07889,ko:K17785	ko04014,ko04144,ko04145,ko04962,ko05146,ko05152,map04014,map04144,map04145,map04962,map05146,map05152	Ras	OTHER
38907	By MS/MS	By matching	By MS/MS	By MS/MS	By matching	NA	By matching	By matching	By matching	NA	NA	By matching	129620000	115870000	230130000	180740000	19401000	0	7409900	22226000	16266000	0	0	26032000	46477000	43888000	123970000	116720000	0	0	0	0	0	0	0	0	82508.K1W0T5	2.76e-231	657	COG2072@1|root,KOG1399@2759|Eukaryota,38D7U@33154|Opisthokonta,3NUI0@4751|Fungi,3V3H0@5204|Basidiomycota	4751|Fungi	Q	#NAME?	NA	NA	NA	NA	FMO-like,NAD_binding_8	OTHER
39848	NA	By MS/MS	By matching	By MS/MS	By MS/MS	By MS/MS	By matching	By MS/MS	By matching	By MS/MS	By MS/MS	NA	0	16910000	19674000	13008000	20808000	15195000	9278600	19929000	23828000	8731100	39032000	0	0	0	0	0	0	0	0	0	0	0	0	0	82508.K1VMK8	1.5e-131	409	2DKTM@1|root,2S63G@2759|Eukaryota,3A6I4@33154|Opisthokonta,3P5KK@4751|Fungi,3V1XX@5204|Basidiomycota,3VCRY@5234|Tremellales	4751|Fungi	S	Subunit 17 of Mediator complex	NA	NA	ko:K15134	NA	Med17	OTHER
40590	By MS/MS	By MS/MS	By MS/MS	By MS/MS	By MS/MS	By MS/MS	By MS/MS	By MS/MS	By MS/MS	By MS/MS	By MS/MS	By MS/MS	3725500000	3225200000	3688300000	2994000000	1416100000	1273500000	1292600000	1939100000	4750100000	5063700000	5090500000	5217500000	3661700000	3216900000	2924500000	2900100000	814420000	850250000	834500000	1005600000	3803600000	3620900000	3402300000	3564300000	552467.XP_003196584.1	4.22e-42	154	COG1881@1|root,KOG3346@2759|Eukaryota,3A5CI@33154|Opisthokonta,3P3ZA@4751|Fungi,3V1S4@5204|Basidiomycota,3VFZ2@5234|Tremellales	4751|Fungi	S	Phosphatidylethanolamine-binding protein	NA	NA	NA	NA	PBP	SP
40746	By matching	By matching	By MS/MS	By matching	By MS/MS	By MS/MS	By MS/MS	By MS/MS	By MS/MS	By MS/MS	By MS/MS	By MS/MS	30506000	55590000	65851000	18454000	101510000	73453000	81665000	104890000	38785000	62127000	32565000	50276000	0	36711000	38292000	0	47036000	43557000	37639000	42904000	0	35582000	0	28793000	NA	NA	NA	NA	NA	NA	NA	NA	NA	NA	NA	NA	OTHER
41209	NA	NA	NA	NA	NA	NA	NA	By MS/MS	NA	NA	NA	NA	0	0	0	0	0	0	0	0	0	0	0	0	0	0	0	0	0	0	0	0	0	0	0	0	82508.K1VT51	9.39e-118	361	2CNG7@1|root,2QW31@2759|Eukaryota,39JCP@33154|Opisthokonta,3P0TS@4751|Fungi,3UYQH@5204|Basidiomycota,3VGFF@5234|Tremellales	4751|Fungi	-	-	NA	NA	NA	NA	-	SP
42465	By MS/MS	By matching	By matching	NA	By MS/MS	By MS/MS	By MS/MS	By MS/MS	By MS/MS	By MS/MS	By MS/MS	By MS/MS	107960000	35641000	79784000	0	302710000	273940000	217050000	302770000	135480000	184920000	230650000	197880000	53644000	0	25952000	0	68024000	85703000	43375000	60706000	47831000	50869000	59750000	66641000	82508.K1WE69	2.39e-216	645	KOG1721@1|root,KOG1721@2759|Eukaryota,39T3J@33154|Opisthokonta,3NUFJ@4751|Fungi,3V20X@5204|Basidiomycota,3VE4Z@5234|Tremellales	4751|Fungi	S	Zinc finger, C2H2 type	NA	NA	ko:K21543	NA	zf-C2H2	OTHER
42912	By MS/MS	By MS/MS	By MS/MS	By MS/MS	By MS/MS	By MS/MS	By MS/MS	By MS/MS	By MS/MS	By MS/MS	By MS/MS	By MS/MS	76676000	156330000	128670000	111000000	220590000	285840000	237060000	165400000	100510000	106100000	144950000	82370000	0	0	94469000	0	129110000	109260000	80528000	99790000	0	86157000	87617000	0	5217.XP_007003788.1	2.02e-83	273	KOG0037@1|root,KOG0037@2759|Eukaryota,38DBU@33154|Opisthokonta,3NX54@4751|Fungi,3V1M5@5204|Basidiomycota,3VGTY@5234|Tremellales	4751|Fungi	T	EF-hand domain pair	NA	GO:0000003,GO:0000278,GO:0000281,GO:0000282,GO:0000910,GO:0003400,GO:0003674,GO:0003824,GO:0004175,GO:0004197,GO:0004198,GO:0005488,GO:0005509,GO:0005575,GO:0005622,GO:0005623,GO:0005634,GO:0005737,GO:0005829,GO:0005933,GO:0005935,GO:0006508,GO:0006807,GO:0007049,GO:0007114,GO:0007120,GO:0007121,GO:0007163,GO:0008150,GO:0008152,GO:0008233,GO:0008234,GO:0008270,GO:0009987,GO:0016787,GO:0019538,GO:…	NA	NA	EF-hand_1,EF-hand_5,EF-hand_6,EF-hand_7,EF-hand_8	OTHER
46763	By matching	By matching	By matching	By matching	By MS/MS	By MS/MS	By MS/MS	By MS/MS	By matching	By matching	By matching	By matching	24390000	33686000	27669000	28014000	75391000	55644000	109300000	60251000	33892000	35785000	35936000	42415000	0	0	0	0	0	0	0	0	0	0	0	0	2074.JNYD01000002_gene5641	7.88e-235	665	COG2072@1|root,COG2072@2|Bacteria,2GKYU@201174|Actinobacteria,4E0RS@85010|Pseudonocardiales	201174|Actinobacteria	P	Flavin-binding monooxygenase-like	NA	NA	ko:K03379	ko00930,ko01120,ko01220,map00930,map01120,map01220	FMO-like,K_oxygenase,Pyr_redox_2,Pyr_redox_3	OTHER
47361	By MS/MS	By MS/MS	By MS/MS	By MS/MS	By matching	NA	By MS/MS	By matching	By MS/MS	By MS/MS	By MS/MS	By MS/MS	153910000	136550000	109920000	45739000	22741000	0	33347000	33057000	143030000	107700000	196250000	97843000	71383000	69047000	38448000	0	0	0	0	0	52202000	47841000	67892000	52092000	82508.K1WV65	6.68e-157	466	2DPNP@1|root,2S69W@2759|Eukaryota,39T0K@33154|Opisthokonta,3NVNJ@4751|Fungi,3V1UV@5204|Basidiomycota,3VCT9@5234|Tremellales	4751|Fungi	S	Protein of unknown function (DUF4243)	NA	GO:0006082,GO:0006725,GO:0008150,GO:0008152,GO:0009058,GO:0009987,GO:0016053,GO:0018130,GO:0018958,GO:0019438,GO:0019748,GO:0019752,GO:0032787,GO:0042180,GO:0042181,GO:0042537,GO:0043436,GO:0044237,GO:0044249,GO:0044281,GO:0044283,GO:0044550,GO:0046189,GO:0046394,GO:0046483,GO:0071704,GO:0072330,GO:1900813,GO:1900815,GO:1901360,GO:1901362,GO:1901576,GO:1901615,GO:1901617,GO:2001305,GO:2001307	NA	NA	DUF4243	OTHER
47843	By MS/MS	By MS/MS	NA	By matching	By MS/MS	By MS/MS	By MS/MS	By MS/MS	By MS/MS	By MS/MS	By MS/MS	By MS/MS	139520000	144650000	0	109010000	0	14918000	125790000	119100000	170940000	158230000	190620000	137280000	0	0	0	0	0	0	0	0	0	0	0	0	82508.K1W0V9	8.41e-245	726	COG0452@1|root,KOG0672@2759|Eukaryota,38DMT@33154|Opisthokonta,3Q555@4751|Fungi,3V7BM@5204|Basidiomycota	4751|Fungi	DP	Vacuolar sorting protein 9 (VPS9) domain	NA	NA	ko:K01598	ko00770,ko01100,map00770,map01100	Flavoprotein,VPS9	OTHER
47906	By matching	By matching	By MS/MS	By MS/MS	By MS/MS	By MS/MS	By MS/MS	By MS/MS	By matching	By matching	By MS/MS	By matching	42156000	62026000	66545000	51316000	201520000	138010000	261800000	237350000	20461000	77567000	60445000	17535000	0	0	0	0	60900000	52248000	76703000	50659000	0	0	32171000	0	5207.AAW41181	1.1e-220	629	29MVY@1|root,2RV66@2759|Eukaryota,39UMF@33154|Opisthokonta,3PV7K@4751|Fungi,3V3UA@5204|Basidiomycota,3VEGT@5234|Tremellales	4751|Fungi	S	Protein of unknown function (DUF563)	NA	NA	NA	NA	DUF563	OTHER
47999	By MS/MS	By MS/MS	By MS/MS	By MS/MS	By MS/MS	By MS/MS	By MS/MS	By MS/MS	By MS/MS	By MS/MS	By MS/MS	By MS/MS	4673300000	4907900000	4645800000	4629100000	4094700000	2465400000	3446000000	2878900000	2509500000	2556500000	2819900000	2301200000	1227000000	1339300000	1160700000	1102100000	731590000	689140000	678880000	705820000	598200000	601250000	551770000	457900000	82508.K1W1D9	1.48e-208	586	COG0183@1|root,KOG1389@2759|Eukaryota,38F89@33154|Opisthokonta,3NX2U@4751|Fungi,3V00E@5204|Basidiomycota,3VHGE@5234|Tremellales	4751|Fungi	I	Thiolase, N-terminal domain	NA	NA	ko:K07513	ko00071,ko00280,ko00592,ko01040,ko01100,ko01110,ko01130,ko01212,ko03320,ko04146,map00071,map00280,map00592,map01040,map01100,map01110,map01130,map01212,map03320,map04146	Thiolase_C,Thiolase_N	OTHER
48991	By MS/MS	By MS/MS	By MS/MS	NA	NA	By MS/MS	By MS/MS	By MS/MS	By MS/MS	NA	NA	By matching	140580000	135370000	109380000	0	0	68629000	81102000	92153000	128910000	0	0	77414000	0	0	0	0	0	0	0	0	0	0	0	0	82508.K1VF23	0	1681	COG5059@1|root,KOG0245@2759|Eukaryota,38BIX@33154|Opisthokonta,3NUHP@4751|Fungi,3V00M@5204|Basidiomycota,3VEGJ@5234|Tremellales	4751|Fungi	Z	Belongs to the TRAFAC class myosin-kinesin ATPase superfamily. Kinesin family	NA	NA	ko:K10392	NA	DUF3694,FHA,KIF1B,Kinesin,Kinesin_assoc,PH	OTHER
50461	By matching	By matching	By matching	By matching	By matching	By MS/MS	By MS/MS	By matching	By MS/MS	By matching	By MS/MS	By matching	15031000	29701000	22006000	69873000	40747000	115760000	152580000	148690000	87061000	44054000	125500000	48390000	0	27653000	0	30166000	0	59399000	42767000	44366000	38831000	30561000	34504000	32165000	82508.K1VXU8	4.51e-231	675	COG0123@1|root,KOG1343@2759|Eukaryota,38XRW@33154|Opisthokonta,3NX84@4751|Fungi,3UZ16@5204|Basidiomycota,3VED3@5234|Tremellales	4751|Fungi	B	Histone deacetylase domain	HOS3	GO:0000082,GO:0000083,GO:0000278,GO:0003674,GO:0003824,GO:0004407,GO:0005575,GO:0005622,GO:0005623,GO:0005628,GO:0005634,GO:0005737,GO:0005933,GO:0005935,GO:0006325,GO:0006355,GO:0006357,GO:0006464,GO:0006476,GO:0006807,GO:0006996,GO:0007049,GO:0008150,GO:0008152,GO:0009889,GO:0009891,GO:0009893,GO:0009987,GO:0010468,GO:0010556,GO:0010557,GO:0010604,GO:0010628,GO:0016020,GO:0016043,GO:0016569,GO:…	ko:K11484	NA	Hist_deacetyl	OTHER
51825	By MS/MS	By MS/MS	By MS/MS	By MS/MS	By MS/MS	By MS/MS	By MS/MS	By MS/MS	By MS/MS	By MS/MS	By MS/MS	By MS/MS	266530000	360450000	373480000	327380000	1453100000	975540000	846800000	1529000000	599750000	396180000	695690000	544410000	113310000	134940000	133720000	141180000	267840000	260340000	182330000	259670000	212060000	111460000	224360000	184580000	82508.K1VGI3	8.02e-104	317	COG5272@1|root,KOG0011@2759|Eukaryota,38CFS@33154|Opisthokonta,3NWKD@4751|Fungi,3UZVD@5204|Basidiomycota,3VE5Q@5234|Tremellales	4751|Fungi	L	XPC-binding domain	RAD23	GO:0000109,GO:0000111,GO:0000122,GO:0000502,GO:0003674,GO:0003676,GO:0003677,GO:0003684,GO:0005488,GO:0005515,GO:0005575,GO:0005622,GO:0005623,GO:0005634,GO:0005737,GO:0005739,GO:0006139,GO:0006259,GO:0006281,GO:0006289,GO:0006355,GO:0006357,GO:0006464,GO:0006508,GO:0006511,GO:0006517,GO:0006725,GO:0006807,GO:0006950,GO:0006974,GO:0008150,GO:0008152,GO:0009056,GO:0009057,GO:0009100,GO:0009889,GO:…	ko:K10839	ko03420,ko04141,map03420,map04141	UBA,XPC-binding,ubiquitin	OTHER
51911	By matching	By matching	By MS/MS	By MS/MS	By MS/MS	By MS/MS	By MS/MS	By MS/MS	By MS/MS	By MS/MS	NA	By MS/MS	14554000	22387000	28088000	23149000	126740000	72720000	143890000	254860000	17153000	118200000	0	79656000	0	0	0	0	49037000	65129000	48245000	61504000	0	0	0	0	552467.XP_003191714.1	0	1256	COG0249@1|root,KOG0219@2759|Eukaryota,38BNJ@33154|Opisthokonta,3NVGK@4751|Fungi,3UZV4@5204|Basidiomycota,3VDSD@5234|Tremellales	4751|Fungi	L	DNA-binding domain of DNA mismatch repair MUTS family	msh2	GO:0000003,GO:0000018,GO:0000166,GO:0000217,GO:0000228,GO:0000400,GO:0000403,GO:0000404,GO:0000406,GO:0000710,GO:0000735,GO:0003006,GO:0003674,GO:0003676,GO:0003677,GO:0003684,GO:0003690,GO:0003824,GO:0005488,GO:0005524,GO:0005575,GO:0005622,GO:0005623,GO:0005634,GO:0005694,GO:0006139,GO:0006259,GO:0006260,GO:0006261,GO:0006275,GO:0006281,GO:0006298,GO:0006301,GO:0006310,GO:0006311,GO:0006312,GO:…	ko:K08735,ko:K19476	ko01524,ko03430,ko04144,ko05200,ko05210,map01524,map03430,map04144,map05200,map05210	MutS_I,MutS_II,MutS_III,MutS_IV,MutS_V	OTHER
52234	By matching	By matching	By matching	By matching	By matching	NA	By MS/MS	By MS/MS	By matching	By matching	By matching	By matching	34735000	33797000	35379000	25278000	40055000	0	51903000	42096000	41060000	39033000	27888000	52803000	0	0	0	0	0	0	0	0	0	0	0	0	5207.AAW41287	2.61e-171	540	KOG4573@1|root,KOG4573@2759|Eukaryota,39RFI@33154|Opisthokonta,3NVHQ@4751|Fungi,3V1Q0@5204|Basidiomycota,3VEGP@5234|Tremellales	4751|Fungi	U	Belongs to the ATG13 family. Fungi subfamily	ATG13	GO:0000045,GO:0000407,GO:0000422,GO:0001932,GO:0001934,GO:0002790,GO:0003674,GO:0005575,GO:0005622,GO:0005623,GO:0005737,GO:0005829,GO:0006810,GO:0006914,GO:0006996,GO:0007005,GO:0007033,GO:0008104,GO:0008150,GO:0008152,GO:0009056,GO:0009306,GO:0009893,GO:0009987,GO:0010562,GO:0010604,GO:0015031,GO:0015833,GO:0016020,GO:0016043,GO:0016236,GO:0016237,GO:0019207,GO:0019220,GO:0019222,GO:0019887,GO:…	ko:K08331	ko04136,ko04138,ko04140,ko04211,map04136,map04138,map04140,map04211	ATG13	OTHER
52522	By MS/MS	By matching	By matching	By matching	By MS/MS	By matching	By MS/MS	By MS/MS	By MS/MS	By matching	By MS/MS	By matching	140040000	52213000	97445000	162050000	183710000	183700000	195840000	190020000	151340000	65178000	189010000	145700000	77748000	0	0	60651000	67823000	71390000	80543000	69343000	0	0	61545000	0	82508.K1VKD0	5.43000000000644e-313	874	COG0513@1|root,KOG0335@2759|Eukaryota,38IV8@33154|Opisthokonta,3NUJV@4751|Fungi,3UYZR@5204|Basidiomycota,3VEEI@5234|Tremellales	4751|Fungi	A	Belongs to the DEAD box helicase family	ded1	GO:0002181,GO:0002183,GO:0003674,GO:0003676,GO:0003723,GO:0003724,GO:0003743,GO:0003824,GO:0004004,GO:0004386,GO:0005488,GO:0005575,GO:0005622,GO:0005623,GO:0005634,GO:0005730,GO:0005737,GO:0006139,GO:0006412,GO:0006413,GO:0006518,GO:0006725,GO:0006807,GO:0008026,GO:0008135,GO:0008150,GO:0008152,GO:0008186,GO:0009058,GO:0009059,GO:0009892,GO:0009987,GO:0010033,GO:0010467,GO:0010468,GO:0010501,GO:…	ko:K11594	ko04622,ko05161,ko05203,map04622,map05161,map05203	DEAD,Helicase_C	OTHER
55922	By MS/MS	By MS/MS	By MS/MS	By MS/MS	By MS/MS	By MS/MS	By MS/MS	By MS/MS	By MS/MS	By MS/MS	By MS/MS	By MS/MS	2562800000	2978700000	2942700000	2968700000	3032700000	2768100000	3440100000	3556500000	3510000000	3662800000	3951800000	4671200000	857450000	983180000	995830000	948330000	713360000	720110000	789810000	703460000	1095100000	1071300000	1016400000	1247300000	5207.AAW45027	0	964	COG0119@1|root,KOG2367@2759|Eukaryota,38SM6@33154|Opisthokonta,3NVRE@4751|Fungi,3UZ1M@5204|Basidiomycota,3VFGY@5234|Tremellales	4751|Fungi	E	LeuA allosteric (dimerisation) domain	LEU4	GO:0003674,GO:0003824,GO:0003852,GO:0005488,GO:0005515,GO:0005575,GO:0005622,GO:0005623,GO:0005737,GO:0005739,GO:0006082,GO:0006520,GO:0006551,GO:0006807,GO:0008150,GO:0008152,GO:0008652,GO:0009058,GO:0009081,GO:0009082,GO:0009098,GO:0009987,GO:0016053,GO:0016740,GO:0016746,GO:0019752,GO:0043226,GO:0043227,GO:0043229,GO:0043231,GO:0043436,GO:0044237,GO:0044238,GO:0044249,GO:0044281,GO:0044283,GO:…	ko:K01649	ko00290,ko00620,ko01100,ko01110,ko01210,ko01230,map00290,map00620,map01100,map01110,map01210,map01230	HMGL-like,LeuA_dimer	OTHER
56183	By MS/MS	By MS/MS	By MS/MS	By MS/MS	By MS/MS	By MS/MS	By MS/MS	By MS/MS	By MS/MS	By MS/MS	By MS/MS	By MS/MS	382650000	503660000	433640000	262290000	63169000	33697000	52022000	43548000	263300000	321410000	308870000	236110000	0	0	0	0	0	0	0	0	0	0	0	0	552467.XP_003193804.1	8.11e-48	160	COG1513@1|root,2RY7W@2759|Eukaryota,3A681@33154|Opisthokonta,3Q6VR@4751|Fungi,3V7WM@5204|Basidiomycota	4751|Fungi	E	Catalyzes the reaction of cyanate with bicarbonate to produce ammonia and carbon dioxide	cyn1	NA	ko:K01725	ko00910,map00910	Cyanate_lyase	OTHER
56559	By MS/MS	By MS/MS	By MS/MS	By MS/MS	By MS/MS	By MS/MS	By MS/MS	By MS/MS	By MS/MS	By MS/MS	By MS/MS	By MS/MS	9606200	8205200	26690000	21522000	29720000	12528000	33962000	40736000	25015000	26585000	34182000	25227000	0	0	0	0	0	0	0	0	0	0	0	0	82508.K1VPD7	7.82e-209	647	KOG1868@1|root,KOG1868@2759|Eukaryota,38DC9@33154|Opisthokonta,3NX9E@4751|Fungi,3UYP9@5204|Basidiomycota,3VEDQ@5234|Tremellales	4751|Fungi	O	Ubiquitin carboxyl-terminal hydrolase	DOA4	GO:0000131,GO:0000502,GO:0002039,GO:0003674,GO:0003824,GO:0004175,GO:0004197,GO:0004843,GO:0005488,GO:0005515,GO:0005575,GO:0005622,GO:0005623,GO:0005634,GO:0005654,GO:0005737,GO:0005739,GO:0005768,GO:0005829,GO:0005933,GO:0005935,GO:0006139,GO:0006259,GO:0006275,GO:0006281,GO:0006283,GO:0006289,GO:0006325,GO:0006355,GO:0006464,GO:0006508,GO:0006511,GO:0006725,GO:0006807,GO:0006810,GO:0006811,GO:…	ko:K11839	ko04137,ko04144,ko04934,map04137,map04144,map04934	Rhodanese,UCH,USP8_dimer	OTHER
57733	NA	By MS/MS	NA	NA	NA	By MS/MS	NA	By MS/MS	NA	NA	NA	NA	0	0	0	0	0	0	0	0	0	0	0	0	0	0	0	0	0	0	0	0	0	0	0	0	82508.K1VNF8	1e-151	442	28N9G@1|root,2QUUW@2759|Eukaryota,38DHT@33154|Opisthokonta,3NU1T@4751|Fungi,3V0FU@5204|Basidiomycota,3VDRE@5234|Tremellales	4751|Fungi	U	Component of the ERMES MDM complex, which serves as a molecular tether to connect the endoplasmic reticulum and mitochondria. Components of this complex are involved in the control of mitochondrial shape and protein biogenesis and may function in phospholipid exchange. The MDM12-MMM1 subcomplex functions in the major beta-barrel assembly pathway that is responsible for biogenesis of all outer mem…	MMM1	GO:0000002,GO:0000723,GO:0003674,GO:0005488,GO:0005575,GO:0005622,GO:0005623,GO:0005737,GO:0005739,GO:0005740,GO:0005741,GO:0005783,GO:0005789,GO:0006139,GO:0006259,GO:0006605,GO:0006626,GO:0006725,GO:0006807,GO:0006810,GO:0006811,GO:0006820,GO:0006839,GO:0006869,GO:0006886,GO:0006996,GO:0007005,GO:0007006,GO:0007008,GO:0008104,GO:0008150,GO:0008152,GO:0008289,GO:0009987,GO:0010876,GO:0012505,GO:…	ko:K17764	ko04139,map04139	MMM1	OTHER
59543	By MS/MS	By MS/MS	By MS/MS	By MS/MS	By MS/MS	By MS/MS	By MS/MS	By MS/MS	By MS/MS	By MS/MS	By MS/MS	By MS/MS	631210000	604340000	754690000	667110000	380040000	435800000	322280000	594750000	776910000	679090000	732340000	689710000	292600000	281100000	292590000	298960000	262110000	192640000	177970000	181430000	331020000	267990000	256460000	267160000	552467.XP_003193916.1	1.35e-40	142	2E950@1|root,2SFIN@2759|Eukaryota,3AE4X@33154|Opisthokonta,3P8WF@4751|Fungi,3V2VW@5204|Basidiomycota,3VFRW@5234|Tremellales	4751|Fungi	S	Mitochondrial ribosomal protein L27	NA	NA	ko:K17422	NA	MRP-L27	OTHER
60284	By MS/MS	By MS/MS	By MS/MS	By MS/MS	By matching	NA	By matching	By matching	By matching	By matching	By MS/MS	By matching	71377000	40711000	76172000	93370000	49026000	0	27647000	42120000	61484000	72896000	40785000	46181000	38562000	0	33906000	64950000	24668000	0	0	0	31544000	32949000	0	0	82508.K1W4Q8	2.75e-267	753	KOG0254@1|root,KOG0254@2759|Eukaryota,38CBN@33154|Opisthokonta,3NUVA@4751|Fungi,3UZUQ@5204|Basidiomycota,3VGGV@5234|Tremellales	4751|Fungi	P	Belongs to the major facilitator superfamily. Sugar transporter (TC 2.A.1.1) family	NA	NA	ko:K08141	NA	Sugar_tr	OTHER
61664	By MS/MS	By MS/MS	By MS/MS	By MS/MS	By MS/MS	By MS/MS	By MS/MS	By MS/MS	By MS/MS	By MS/MS	By MS/MS	By matching	223370000	236170000	320330000	274490000	310270000	529680000	429930000	623720000	152150000	149590000	221240000	142150000	100190000	97897000	147270000	103920000	91015000	154040000	143100000	124450000	80876000	105340000	70700000	66330000	552467.XP_003194719.1	3.43e-228	632	COG1163@1|root,KOG1486@2759|Eukaryota,39QXU@33154|Opisthokonta,3NU94@4751|Fungi,3UXYV@5204|Basidiomycota,3VE08@5234|Tremellales	4751|Fungi	T	C-terminal region of MMR_HSR1 domain	RBG2	GO:0000166,GO:0001882,GO:0001883,GO:0002181,GO:0003674,GO:0005488,GO:0005515,GO:0005525,GO:0005575,GO:0005622,GO:0005623,GO:0005737,GO:0006412,GO:0006518,GO:0006807,GO:0008150,GO:0008152,GO:0009058,GO:0009059,GO:0009987,GO:0010467,GO:0010646,GO:0010647,GO:0017076,GO:0019001,GO:0019538,GO:0032101,GO:0032103,GO:0032104,GO:0032106,GO:0032107,GO:0032109,GO:0032549,GO:0032550,GO:0032553,GO:0032555,GO:…	ko:K06944	NA	MMR_HSR1,MMR_HSR1_Xtn,TGS	OTHER
67234	By MS/MS	By MS/MS	By MS/MS	By MS/MS	By matching	By MS/MS	By matching	By MS/MS	NA	By MS/MS	By MS/MS	By MS/MS	21167000	26040000	20019000	24687000	30154000	30053000	35926000	40678000	0	33309000	35679000	29125000	0	0	0	0	0	0	0	0	0	0	0	0	82508.K1VST6	4.71e-244	763	2CJMC@1|root,2RGNW@2759|Eukaryota,39ZTM@33154|Opisthokonta,3P0SM@4751|Fungi,3V06I@5204|Basidiomycota,3VF6J@5234|Tremellales	4751|Fungi	-	-	NA	NA	NA	NA	-	OTHER
68226	By matching	By MS/MS	By MS/MS	By MS/MS	By MS/MS	By MS/MS	By MS/MS	By matching	By MS/MS	By matching	By MS/MS	By matching	131900000	105660000	121700000	108020000	233950000	135870000	262990000	216060000	141050000	122570000	143220000	157830000	0	0	0	0	72506000	98076000	66513000	0	0	0	42146000	0	5207.AAW41633	5.92e-212	590	COG0470@1|root,KOG2035@2759|Eukaryota,38FUD@33154|Opisthokonta,3NWCC@4751|Fungi,3UYK2@5204|Basidiomycota,3VDCT@5234|Tremellales	4751|Fungi	L	Replication factor C C-terminal domain	RFC5	GO:0000228,GO:0000785,GO:0000790,GO:0000819,GO:0003674,GO:0003676,GO:0003677,GO:0003689,GO:0003824,GO:0005488,GO:0005575,GO:0005622,GO:0005623,GO:0005634,GO:0005657,GO:0005663,GO:0005694,GO:0006139,GO:0006259,GO:0006260,GO:0006261,GO:0006271,GO:0006272,GO:0006281,GO:0006725,GO:0006807,GO:0006950,GO:0006974,GO:0006996,GO:0007049,GO:0007059,GO:0007062,GO:0008094,GO:0008150,GO:0008152,GO:0009058,GO:…	ko:K10756	ko03030,ko03420,ko03430,map03030,map03420,map03430	DNA_pol3_delta2	OTHER
71843	NA	NA	NA	By matching	By matching	By MS/MS	By matching	By MS/MS	NA	NA	NA	NA	0	0	0	11592000	81276000	31991000	29552000	96988000	0	0	0	0	0	0	0	0	0	0	0	0	0	0	0	0	NA	NA	NA	NA	NA	NA	NA	NA	NA	NA	NA	NA	SP
72322	By matching	By matching	By MS/MS	By MS/MS	By MS/MS	By MS/MS	By MS/MS	By MS/MS	By MS/MS	By matching	By MS/MS	By MS/MS	188370000	153610000	187140000	150760000	154010000	113530000	180940000	187890000	137410000	135590000	173540000	175080000	0	0	84738000	100500000	60637000	78118000	67585000	66514000	70891000	0	73862000	97163000	5207.AAW41422	1.78e-09	66.6	2E4PI@1|root,2SBIV@2759|Eukaryota,3AD6Z@33154|Opisthokonta,3P8EW@4751|Fungi,3V332@5204|Basidiomycota,3VG51@5234|Tremellales	4751|Fungi	-	-	NA	NA	NA	NA	-	OTHER
72678	By MS/MS	By MS/MS	By MS/MS	By MS/MS	By MS/MS	By MS/MS	By MS/MS	By MS/MS	By MS/MS	By MS/MS	By MS/MS	By MS/MS	2156400000	2788700000	2525500000	1952000000	914510000	674480000	741070000	970370000	147010000	140220000	205020000	175360000	717070000	830990000	662420000	612450000	201990000	186880000	205710000	194380000	81167000	58634000	70088000	76272000	82508.K1VLA0	4.41e-125	364	COG1741@1|root,2RXW4@2759|Eukaryota,3A01A@33154|Opisthokonta,3P25M@4751|Fungi,3V0EK@5204|Basidiomycota,3VE8H@5234|Tremellales	4751|Fungi	S	Pirin	NA	NA	ko:K06911	NA	Pirin	OTHER
72737	NA	NA	NA	NA	NA	By MS/MS	NA	NA	NA	NA	NA	NA	0	0	0	0	0	0	0	0	0	0	0	0	0	0	0	0	0	0	0	0	0	0	0	0	82508.K1VWS0	1.98e-196	575	28PRC@1|root,2QWDT@2759|Eukaryota,39AAF@33154|Opisthokonta,3Q528@4751|Fungi,3UXXB@5204|Basidiomycota,3VGDR@5234|Tremellales	4751|Fungi	B	Fungal specific transcription factor domain	NA	NA	NA	NA	Fungal_trans,Zn_clus	OTHER
73237	By MS/MS	By MS/MS	By MS/MS	By MS/MS	By MS/MS	By MS/MS	By MS/MS	By MS/MS	By MS/MS	By MS/MS	By MS/MS	By MS/MS	564810000	498730000	599280000	293420000	752600000	765970000	875350000	1083100000	493990000	524590000	572900000	376440000	212640000	186060000	191250000	188480000	210270000	195480000	215040000	184420000	187170000	172510000	159900000	204020000	82508.K1VY01	1.93e-228	659	COG5076@1|root,KOG1474@2759|Eukaryota,38EH8@33154|Opisthokonta,3NVXS@4751|Fungi,3VBT0@5204|Basidiomycota,3VDNH@5234|Tremellales	4751|Fungi	K	Bromodomain extra-terminal - transcription regulation	BDF1	GO:0000228,GO:0000785,GO:0000790,GO:0000812,GO:0001047,GO:0001067,GO:0001085,GO:0001091,GO:0001094,GO:0001098,GO:0001099,GO:0001672,GO:0003674,GO:0003676,GO:0003677,GO:0003682,GO:0005488,GO:0005515,GO:0005575,GO:0005622,GO:0005623,GO:0005634,GO:0005694,GO:0006139,GO:0006259,GO:0006281,GO:0006325,GO:0006338,GO:0006351,GO:0006355,GO:0006725,GO:0006807,GO:0006950,GO:0006974,GO:0006996,GO:0008134,GO:…	ko:K11684	NA	BET,Bromodomain	OTHER
73599	By MS/MS	By MS/MS	By MS/MS	By MS/MS	By MS/MS	By MS/MS	By MS/MS	By MS/MS	By MS/MS	By MS/MS	By MS/MS	By MS/MS	2563500000	2073700000	2250900000	2208200000	1024800000	873020000	1098500000	1254100000	2734800000	2961600000	2974700000	2826700000	701260000	529540000	545200000	599580000	217540000	236040000	222070000	222200000	735180000	697520000	652270000	693290000	82508.K1W541	7.64e-187	528	COG1601@1|root,KOG2767@2759|Eukaryota,38DWM@33154|Opisthokonta,3NUY5@4751|Fungi,3UZB1@5204|Basidiomycota,3VDUV@5234|Tremellales	4751|Fungi	J	Domain found in IF2B/IF5	TIF5	GO:0001732,GO:0002181,GO:0002183,GO:0003674,GO:0003676,GO:0003723,GO:0003743,GO:0005092,GO:0005096,GO:0005488,GO:0005515,GO:0005575,GO:0005622,GO:0005623,GO:0005737,GO:0005829,GO:0005840,GO:0006412,GO:0006413,GO:0006417,GO:0006446,GO:0006518,GO:0006807,GO:0006996,GO:0008047,GO:0008135,GO:0008150,GO:0008152,GO:0009058,GO:0009059,GO:0009889,GO:0009890,GO:0009892,GO:0009987,GO:0010467,GO:0010468,GO:…	ko:K03262	ko03013,ko04214,map03013,map04214	W2,eIF-5_eIF-2B	OTHER
74381	By matching	By matching	By MS/MS	By matching	By MS/MS	By MS/MS	By matching	By MS/MS	By matching	By matching	NA	By matching	18270000	15040000	35345000	37605000	18428000	33056000	20108000	52892000	20368000	23706000	0	36194000	0	0	0	0	0	0	0	0	0	0	0	0	552467.XP_003196316.1	2.57e-259	737	COG5260@1|root,KOG2277@2759|Eukaryota,38EW5@33154|Opisthokonta,3Q321@4751|Fungi,3UZW2@5204|Basidiomycota,3VDVP@5234|Tremellales	4751|Fungi	D	Cid1 family poly A polymerase	NA	NA	ko:K13291	NA	NTP_transf_2,PAP_assoc	OTHER
75367	By MS/MS	By MS/MS	By MS/MS	By MS/MS	By matching	By MS/MS	By matching	By MS/MS	By MS/MS	By MS/MS	By matching	By matching	210420000	114930000	218240000	234580000	76701000	189590000	140750000	108490000	173400000	216660000	207930000	106600000	69438000	60064000	95226000	117190000	0	62421000	0	44506000	73615000	79622000	75980000	0	474922.ELA25712	1.02e-138	410	COG1231@1|root,KOG0029@2759|Eukaryota,39TNH@33154|Opisthokonta,3NZQ1@4751|Fungi,3RJJ7@4890|Ascomycota,21QBC@147550|Sordariomycetes,1F76Z@1028384|Glomerellales	4751|Fungi	Q	Flavin containing amine oxidoreductase	NA	NA	ko:K19413	NA	Amino_oxidase	OTHER
75965	By MS/MS	By MS/MS	By MS/MS	By MS/MS	By MS/MS	By MS/MS	By MS/MS	By MS/MS	By MS/MS	By MS/MS	By MS/MS	By MS/MS	2221700000	2410900000	2530000000	2103500000	4547000000	3723200000	4044200000	4590600000	2671800000	2700700000	3153900000	3452700000	622140000	733430000	677210000	644200000	847490000	858860000	829940000	837660000	631500000	688560000	702960000	861030000	82508.K1WNV6	1.03e-107	339	KOG0116@1|root,KOG0116@2759|Eukaryota,390RG@33154|Opisthokonta,3NXYT@4751|Fungi,3V00W@5204|Basidiomycota,3VDD3@5234|Tremellales	4751|Fungi	A	Nuclear transport factor 2 (NTF2) domain	NA	GO:0000932,GO:0003674,GO:0003676,GO:0003723,GO:0003729,GO:0005488,GO:0005575,GO:0005622,GO:0005623,GO:0005737,GO:0005829,GO:0006464,GO:0006508,GO:0006807,GO:0006914,GO:0008150,GO:0008152,GO:0009056,GO:0009987,GO:0010494,GO:0016236,GO:0016579,GO:0019538,GO:0032386,GO:0032879,GO:0032991,GO:0034517,GO:0035770,GO:0035973,GO:0036211,GO:0036464,GO:0043021,GO:0043170,GO:0043226,GO:0043228,GO:0043229,GO:…	ko:K19718	ko04139,map04139	NTF2,RRM_1	OTHER
76203	By MS/MS	By MS/MS	By MS/MS	By MS/MS	By MS/MS	By MS/MS	By MS/MS	By MS/MS	By MS/MS	By MS/MS	By MS/MS	By MS/MS	3857100000	4618900000	8398500000	7315800000	8859700000	7418300000	9433900000	11329000000	9363300000	9834700000	9092900000	9376600000	1865100000	2127500000	2095100000	2086200000	2536200000	4100700000	2931800000	3384300000	1857200000	1876200000	1862800000	2032000000	5207.AAW43553	0	1122	COG3957@1|root,2QUUF@2759|Eukaryota,39R9S@33154|Opisthokonta,3NWRX@4751|Fungi,3UZC7@5204|Basidiomycota,3VEQA@5234|Tremellales	4751|Fungi	G	D-xylulose 5-phosphate/D-fructose 6-phosphate phosphoketolase	NA	NA	ko:K01621	ko00030,ko00710,ko01100,ko01120,map00030,map00710,map01100,map01120	XFP,XFP_C,XFP_N	OTHER
76384	By matching	NA	NA	NA	By MS/MS	NA	By matching	By matching	NA	NA	NA	NA	2537200	0	0	0	4678500	0	6466300	5300500	0	0	0	0	0	0	0	0	0	0	0	0	0	0	0	0	NA	NA	NA	NA	NA	NA	NA	NA	NA	NA	NA	NA	OTHER
76427	By MS/MS	By MS/MS	By MS/MS	By MS/MS	By MS/MS	By MS/MS	By MS/MS	By MS/MS	By MS/MS	By MS/MS	By MS/MS	By MS/MS	206430000	220050000	158560000	204300000	394960000	299170000	488530000	534250000	157930000	210770000	293860000	216100000	56234000	61173000	66926000	53612000	98660000	83103000	108070000	104000000	49714000	52638000	46960000	48458000	5217.XP_007002040.1	0	972	COG0204@1|root,2QQ2N@2759|Eukaryota,38VQI@33154|Opisthokonta,3NVRF@4751|Fungi,3UY5Y@5204|Basidiomycota,3VENF@5234|Tremellales	4751|Fungi	I	glycerol-3-phosphate O-acyltransferase	SCT1	GO:0003674,GO:0003824,GO:0004366,GO:0005575,GO:0005622,GO:0005623,GO:0005737,GO:0005783,GO:0005789,GO:0006629,GO:0006644,GO:0006793,GO:0006796,GO:0008150,GO:0008152,GO:0008374,GO:0008610,GO:0008654,GO:0009058,GO:0009987,GO:0012505,GO:0016020,GO:0016021,GO:0016287,GO:0016407,GO:0016413,GO:0016740,GO:0016746,GO:0016747,GO:0019637,GO:0030176,GO:0031224,GO:0031227,GO:0031984,GO:0042175,GO:0043226,GO:…	ko:K13507	ko00561,ko00564,ko01100,ko01110,map00561,map00564,map01100,map01110	Acyltransferase	OTHER
76492	By MS/MS	By MS/MS	By MS/MS	By MS/MS	By MS/MS	By MS/MS	By MS/MS	By MS/MS	By MS/MS	By MS/MS	By MS/MS	By MS/MS	5296800	3562500	17991000	12387000	7451700	3677200	17217000	15715000	19224000	18752000	20604000	21323000	0	0	13929000	9165200	6016800	4694500	9654600	6492700	14480000	13797000	12308000	16503000	NA	NA	NA	NA	NA	NA	NA	NA	NA	NA	NA	NA	OTHER
78164	By MS/MS	By MS/MS	By MS/MS	By MS/MS	By MS/MS	By MS/MS	By MS/MS	By MS/MS	By MS/MS	By MS/MS	By MS/MS	By MS/MS	1169500000	1014600000	1080000000	785180000	1226600000	916390000	1198800000	1711900000	1027900000	1516500000	1489700000	967850000	166360000	177900000	138700000	165090000	128200000	135390000	133800000	142210000	153370000	158760000	142350000	134740000	82508.K1WKS6	0	1035	COG5147@1|root,KOG0050@2759|Eukaryota,38D9Q@33154|Opisthokonta,3NU2G@4751|Fungi,3UXYJ@5204|Basidiomycota,3VD63@5234|Tremellales	4751|Fungi	K	pre-mRNA splicing factor component	CEF1	GO:0000350,GO:0000375,GO:0000377,GO:0000393,GO:0000398,GO:0000974,GO:0000981,GO:0000988,GO:0000989,GO:0001067,GO:0001076,GO:0001134,GO:0001135,GO:0003674,GO:0003676,GO:0003677,GO:0003700,GO:0005488,GO:0005575,GO:0005622,GO:0005623,GO:0005634,GO:0005681,GO:0005684,GO:0005737,GO:0005829,GO:0006139,GO:0006355,GO:0006357,GO:0006396,GO:0006397,GO:0006725,GO:0006807,GO:0008150,GO:0008152,GO:0008380,GO:…	ko:K12860	ko03040,map03040	Myb_Cef,Myb_DNA-binding	OTHER
78213	By MS/MS	By MS/MS	By MS/MS	By MS/MS	By MS/MS	By MS/MS	By MS/MS	By matching	By MS/MS	By MS/MS	By MS/MS	By MS/MS	542100000	270070000	379740000	331120000	498150000	314190000	363100000	471170000	280990000	260960000	315040000	292270000	225390000	210200000	236840000	231950000	401010000	254440000	157840000	168000000	216690000	194980000	201310000	130600000	82508.K1VBB1	1.09e-38	150	KOG2483@1|root,KOG2483@2759|Eukaryota,3A8S2@33154|Opisthokonta,3P7H5@4751|Fungi,3V2P0@5204|Basidiomycota,3VFVK@5234|Tremellales	4751|Fungi	K	helix loop helix domain	NA	GO:0000976,GO:0000977,GO:0000978,GO:0000981,GO:0000982,GO:0000987,GO:0001012,GO:0001067,GO:0003674,GO:0003676,GO:0003677,GO:0003690,GO:0003700,GO:0005488,GO:0006355,GO:0006357,GO:0008150,GO:0009889,GO:0009891,GO:0009893,GO:0010468,GO:0010514,GO:0010556,GO:0010557,GO:0010604,GO:0010628,GO:0019219,GO:0019222,GO:0031136,GO:0031137,GO:0031139,GO:0031140,GO:0031141,GO:0031323,GO:0031325,GO:0031326,GO:…	NA	NA	HLH	OTHER
78584	By matching	By matching	By matching	By matching	By matching	By matching	By MS/MS	By MS/MS	By MS/MS	By matching	By matching	By matching	74234000	113780000	52012000	70137000	99234000	207930000	126860000	265200000	351140000	151680000	327840000	74239000	0	0	0	0	0	0	0	0	0	0	0	0	82508.K1WQY3	2.02e-97	294	COG0580@1|root,KOG0223@2759|Eukaryota,398Y2@33154|Opisthokonta,3NV37@4751|Fungi,3V0ZF@5204|Basidiomycota,3VF91@5234|Tremellales	4751|Fungi	G	Belongs to the MIP aquaporin (TC 1.A.8) family	NA	NA	ko:K09885	NA	MIP	OTHER
80195	By MS/MS	By MS/MS	By MS/MS	By MS/MS	By MS/MS	By MS/MS	By matching	By matching	By matching	By matching	By matching	By MS/MS	139950000	253310000	274820000	180980000	348630000	202640000	341740000	317150000	61793000	107800000	35373000	160960000	217490000	186670000	69288000	70249000	120480000	105180000	74990000	0	71222000	0	0	58798000	82508.K1VBP3	3.09e-97	293	COG1024@1|root,KOG0016@2759|Eukaryota,38F2P@33154|Opisthokonta,3NXV1@4751|Fungi,3V1BW@5204|Basidiomycota	4751|Fungi	I	Enoyl-CoA hydratase/isomerase	NA	NA	ko:K13239	ko00071,ko04146,map00071,map04146	ECH_1	OTHER
80470	By MS/MS	By MS/MS	By MS/MS	By MS/MS	By MS/MS	By MS/MS	By MS/MS	By MS/MS	By MS/MS	By MS/MS	By MS/MS	By MS/MS	547590000	401160000	545680000	684820000	418650000	551760000	527130000	648430000	678730000	801620000	888060000	430350000	208640000	163780000	171260000	328910000	86649000	238220000	163660000	210000000	285380000	330630000	295210000	428010000	82508.K1VX01	1.95e-174	498	COG0665@1|root,KOG2852@2759|Eukaryota,38D0X@33154|Opisthokonta,3NU73@4751|Fungi,3UY7H@5204|Basidiomycota,3VCVS@5234|Tremellales	4751|Fungi	E	Cytoplasm protein	NA	GO:0000003,GO:0003674,GO:0003824,GO:0005575,GO:0005622,GO:0005623,GO:0005737,GO:0005739,GO:0005768,GO:0005770,GO:0006810,GO:0007049,GO:0008150,GO:0008152,GO:0009987,GO:0012505,GO:0016192,GO:0016197,GO:0016482,GO:0016491,GO:0022414,GO:0031410,GO:0031982,GO:0042147,GO:0043226,GO:0043227,GO:0043229,GO:0043231,GO:0044424,GO:0044444,GO:0044464,GO:0046907,GO:0051179,GO:0051234,GO:0051321,GO:0051641,GO:…	NA	NA	DAO	OTHER
81805	By matching	By matching	By matching	By matching	By MS/MS	By matching	By MS/MS	By MS/MS	By matching	By matching	By matching	By matching	10641000	6545800	38556000	44751000	39884000	7592100	52978000	54853000	41958000	45979000	44092000	40465000	0	0	0	0	0	0	0	0	0	0	0	0	82508.K1VPF6	0	951	2976I@1|root,2RE5Y@2759|Eukaryota,38JD5@33154|Opisthokonta,3PM9P@4751|Fungi,3VB9F@5204|Basidiomycota,3VDHC@5234|Tremellales	4751|Fungi	-	-	NA	NA	NA	NA	-	OTHER
82737	By MS/MS	By MS/MS	By MS/MS	By matching	By MS/MS	By MS/MS	By MS/MS	By MS/MS	By MS/MS	By MS/MS	By MS/MS	By matching	48389000	16954000	0	34340000	177420000	100320000	150050000	149310000	51426000	43275000	58096000	31078000	32277000	0	0	0	60705000	62225000	54273000	68116000	32012000	26946000	30789000	0	5217.XP_007004471.1	3.18e-297	847	2CMZJ@1|root,2QSY2@2759|Eukaryota,38DF4@33154|Opisthokonta,3NUPW@4751|Fungi,3UZSR@5204|Basidiomycota,3VD4R@5234|Tremellales	4751|Fungi	K	Fungal specific transcription factor domain	GIN1	GO:0000429,GO:0000436,GO:0000976,GO:0000977,GO:0000978,GO:0000981,GO:0000982,GO:0000987,GO:0001012,GO:0001067,GO:0001077,GO:0001228,GO:0003674,GO:0003676,GO:0003677,GO:0003690,GO:0003700,GO:0005488,GO:0005575,GO:0005622,GO:0005623,GO:0005634,GO:0006139,GO:0006351,GO:0006355,GO:0006357,GO:0006366,GO:0006725,GO:0006807,GO:0007154,GO:0007584,GO:0008150,GO:0008152,GO:0008270,GO:0009058,GO:0009059,GO:…	NA	NA	Fungal_trans,Zn_clus	OTHER
83438	By MS/MS	By MS/MS	By MS/MS	By MS/MS	By MS/MS	By MS/MS	By MS/MS	By MS/MS	By MS/MS	By MS/MS	By MS/MS	By MS/MS	1320200000	1442900000	1463600000	1369900000	2246500000	2202400000	1790900000	3476300000	1545000000	1784700000	1623800000	1149100000	357600000	430220000	417100000	464030000	479960000	453480000	395570000	508050000	434660000	423940000	368220000	348430000	82508.K1VHW2	3.8e-137	397	COG0656@1|root,KOG1577@2759|Eukaryota,39W1H@33154|Opisthokonta,3NY5Y@4751|Fungi,3UZ7V@5204|Basidiomycota,3VCQH@5234|Tremellales	4751|Fungi	S	Aldo/keto reductase family	NA	NA	NA	NA	Aldo_ket_red	OTHER
83940	By MS/MS	By MS/MS	By MS/MS	By MS/MS	By MS/MS	By MS/MS	By MS/MS	By MS/MS	By MS/MS	By MS/MS	By MS/MS	By MS/MS	119820000	107570000	153800000	118720000	157690000	157530000	136740000	157430000	98569000	116560000	137440000	113720000	0	0	0	0	94460000	103700000	86240000	108610000	0	0	78985000	0	1434929.X946_4524	8.15e-84	256	COG0693@1|root,COG0693@2|Bacteria,1N8N6@1224|Proteobacteria,2VSBY@28216|Betaproteobacteria,1KGSH@119060|Burkholderiaceae	28216|Betaproteobacteria	S	DJ-1/PfpI family	NA	NA	ko:K18199	ko00930,map00930	DJ-1_PfpI	OTHER
85172	By MS/MS	By MS/MS	By MS/MS	By MS/MS	By MS/MS	By MS/MS	By MS/MS	By MS/MS	By MS/MS	By MS/MS	By MS/MS	By MS/MS	9554000000	9420700000	10482000000	8868400000	2254700000	2176500000	2288200000	2145300000	5797100000	6130600000	6361000000	5959800000	5712900000	6295000000	5654300000	5128400000	1025500000	1240100000	1008300000	933590000	3348600000	3286600000	2977200000	3001700000	82508.K1VPF5	3.77e-166	469	COG3485@1|root,2QU2V@2759|Eukaryota,38B9N@33154|Opisthokonta,3NU8P@4751|Fungi,3V0E7@5204|Basidiomycota	4751|Fungi	E	Catechol dioxygenase N terminus	HQD2	GO:0003674,GO:0003824,GO:0005488,GO:0005506,GO:0006725,GO:0008150,GO:0008152,GO:0008199,GO:0009056,GO:0009712,GO:0009987,GO:0016491,GO:0016701,GO:0016702,GO:0018576,GO:0018958,GO:0019114,GO:0019336,GO:0019439,GO:0019614,GO:0019615,GO:0042952,GO:0043167,GO:0043169,GO:0044237,GO:0044248,GO:0046872,GO:0046914,GO:0051213,GO:0055114,GO:0071704,GO:1901360,GO:1901361,GO:1901575,GO:1901615,GO:1901616	ko:K03381	ko00361,ko00362,ko00364,ko00623,ko01100,ko01120,ko01220,map00361,map00362,map00364,map00623,map01100,map01120,map01220	Dioxygenase_C,Dioxygenase_N	OTHER
85257	By MS/MS	By MS/MS	By MS/MS	By MS/MS	By matching	By matching	By matching	By matching	By MS/MS	By MS/MS	By MS/MS	By MS/MS	330450000	250980000	378250000	302150000	27527000	65524000	20870000	39549000	258280000	266930000	401390000	406140000	244700000	272460000	205160000	234670000	0	0	0	38180000	195830000	249790000	210670000	189880000	82508.K1WN23	2.69e-74	236	COG1028@1|root,KOG0725@2759|Eukaryota,3949X@33154|Opisthokonta,3NW0W@4751|Fungi	4751|Fungi	Q	Dehydrogenase	NA	NA	NA	NA	adh_short_C2	OTHER
85394	By MS/MS	By MS/MS	By MS/MS	By MS/MS	NA	NA	NA	NA	By MS/MS	NA	By matching	By matching	0	53004000	54092000	42509000	0	0	0	0	0	0	26488000	40479000	0	0	0	0	0	0	0	0	0	0	0	0	NA	NA	NA	NA	NA	NA	NA	NA	NA	NA	NA	NA	OTHER
85801	By matching	By matching	By MS/MS	NA	By MS/MS	By MS/MS	By MS/MS	By MS/MS	By matching	By matching	NA	NA	22754000	19877000	52217000	0	85184000	104140000	91246000	91886000	30277000	29271000	0	0	0	0	0	0	0	0	0	0	0	0	0	0	5207.AAW43782	2.06e-106	320	KOG1471@1|root,KOG1471@2759|Eukaryota,39SE5@33154|Opisthokonta,3P036@4751|Fungi,3V4K0@5204|Basidiomycota	4751|Fungi	I	CRAL TRIO domain-containing protein	SFH5	GO:0000322,GO:0000323,GO:0000324,GO:0000329,GO:0003674,GO:0005215,GO:0005319,GO:0005548,GO:0005575,GO:0005622,GO:0005623,GO:0005634,GO:0005737,GO:0005773,GO:0005774,GO:0005783,GO:0005829,GO:0005886,GO:0005938,GO:0006629,GO:0006644,GO:0006650,GO:0006793,GO:0006796,GO:0006810,GO:0006811,GO:0006820,GO:0006869,GO:0006892,GO:0006893,GO:0008104,GO:0008150,GO:0008152,GO:0008526,GO:0009987,GO:0010876,GO:…	ko:K19996	NA	CRAL_TRIO,CRAL_TRIO_N	OTHER
86328	By matching	By matching	By matching	By matching	By matching	By matching	By matching	By MS/MS	By matching	By matching	By matching	By matching	72211000	34921000	36132000	34192000	54061000	54663000	33290000	41603000	22197000	33708000	37636000	34515000	0	0	0	0	0	0	0	0	0	0	0	0	82508.K1VYR0	4.07e-274	786	KOG2347@1|root,KOG2347@2759|Eukaryota,38C3S@33154|Opisthokonta,3NU6Y@4751|Fungi,3UZ48@5204|Basidiomycota,3VCRK@5234|Tremellales	4751|Fungi	U	Exocyst complex component Sec5	SEC5	GO:0000131,GO:0000145,GO:0001927,GO:0005575,GO:0005622,GO:0005623,GO:0005628,GO:0005737,GO:0005933,GO:0005934,GO:0005935,GO:0005937,GO:0005938,GO:0006810,GO:0006887,GO:0006892,GO:0006893,GO:0006903,GO:0006904,GO:0006996,GO:0007029,GO:0008150,GO:0009987,GO:0010256,GO:0016020,GO:0016043,GO:0016192,GO:0022406,GO:0022607,GO:0030427,GO:0032940,GO:0032991,GO:0034622,GO:0042763,GO:0042764,GO:0042995,GO:…	ko:K17637	ko04014,map04014	Sec5	OTHER
87148	By MS/MS	By MS/MS	By MS/MS	By MS/MS	By MS/MS	By MS/MS	By MS/MS	By MS/MS	By MS/MS	By MS/MS	By MS/MS	By MS/MS	96438000	106220000	110420000	84121000	144890000	105440000	182470000	106320000	84735000	107340000	122570000	21345000	60025000	60703000	60516000	55160000	53517000	56667000	49875000	43028000	51363000	51462000	53637000	0	82508.K1VRL0	3.97e-37	137	2AZ0C@1|root,2S7WA@2759|Eukaryota,3AXNI@33154|Opisthokonta,3PITG@4751|Fungi,3V6UN@5204|Basidiomycota,3VFZW@5234|Tremellales	4751|Fungi	S	Fungal domain of unknown function (DUF1750)	NA	NA	NA	NA	SWI-SNF_Ssr4	OTHER
89743	By MS/MS	NA	NA	NA	NA	NA	NA	NA	NA	NA	NA	NA	39691000	0	0	0	0	0	0	0	0	0	0	0	0	0	0	0	0	0	0	0	0	0	0	0	NA	NA	NA	NA	NA	NA	NA	NA	NA	NA	NA	NA	OTHER
90387	NA	By MS/MS	By matching	By MS/MS	NA	By MS/MS	NA	NA	By MS/MS	By MS/MS	By MS/MS	By matching	0	0	19286000	0	0	32766000	0	0	52610000	50245000	77378000	47960000	0	0	0	0	0	0	0	0	0	0	0	0	82508.K1VNL3	2.18e-118	356	COG0631@1|root,KOG1379@2759|Eukaryota,38HMT@33154|Opisthokonta,3NX30@4751|Fungi,3V0QW@5204|Basidiomycota,3VD6V@5234|Tremellales	4751|Fungi	T	Sigma factor PP2C-like phosphatases	PTC7	GO:0003674,GO:0003824,GO:0004721,GO:0004722,GO:0005575,GO:0005622,GO:0005623,GO:0005634,GO:0005635,GO:0005737,GO:0005739,GO:0006464,GO:0006470,GO:0006793,GO:0006796,GO:0006807,GO:0008150,GO:0008152,GO:0009889,GO:0009891,GO:0009893,GO:0009987,GO:0010565,GO:0010566,GO:0010795,GO:0012505,GO:0016311,GO:0016787,GO:0016788,GO:0016791,GO:0019222,GO:0019538,GO:0023052,GO:0031323,GO:0031325,GO:0031326,GO:…	ko:K17508	NA	SpoIIE	OTHER
91359	By matching	By matching	By MS/MS	By MS/MS	By MS/MS	By MS/MS	By MS/MS	By MS/MS	By MS/MS	By MS/MS	By MS/MS	By matching	121570000	103310000	120050000	96262000	229860000	136520000	241350000	218210000	114680000	123250000	124690000	48726000	60300000	0	0	0	58055000	58815000	58056000	70091000	56502000	0	0	0	5217.XP_007002328.1	2.74e-89	288	2BUZE@1|root,2S247@2759|Eukaryota,39SGV@33154|Opisthokonta,3NXE2@4751|Fungi,3V16H@5204|Basidiomycota,3VFTG@5234|Tremellales	4751|Fungi	S	von Willebrand factor (vWF) type A domain	NA	NA	NA	NA	VWA	OTHER
92358	By MS/MS	By MS/MS	By MS/MS	By MS/MS	By MS/MS	By MS/MS	By MS/MS	By MS/MS	By MS/MS	By MS/MS	By MS/MS	By MS/MS	4001500000	3850700000	3648700000	3905100000	5414000000	4379700000	5902500000	6126200000	3723300000	4005600000	4098800000	3935500000	917600000	844960000	788200000	888930000	878770000	943040000	971170000	911780000	767480000	801590000	718940000	743220000	82508.K1VMB2	3.46e-140	407	2DZHE@1|root,2S71A@2759|Eukaryota,39KE6@33154|Opisthokonta,3Q4SR@4751|Fungi	4751|Fungi	S	NAD dependent epimerase/dehydratase family	NA	NA	NA	NA	Epimerase	OTHER
92684	By MS/MS	By MS/MS	By MS/MS	By MS/MS	By MS/MS	By MS/MS	By MS/MS	By MS/MS	By MS/MS	By MS/MS	By MS/MS	By MS/MS	280550000	274180000	303640000	306400000	629200000	464140000	520760000	578550000	205440000	217720000	211140000	280900000	89314000	102770000	140410000	145400000	138760000	134080000	123690000	142730000	130370000	125400000	108460000	108440000	82508.K1VIQ3	3.76e-258	733	KOG4547@1|root,KOG4547@2759|Eukaryota,38HDH@33154|Opisthokonta,3NWZN@4751|Fungi,3UYFY@5204|Basidiomycota,3VDP7@5234|Tremellales	4751|Fungi	S	Dip2/Utp12 Family	UTP5	GO:0000462,GO:0000785,GO:0000792,GO:0003674,GO:0003676,GO:0003723,GO:0005488,GO:0005575,GO:0005622,GO:0005623,GO:0005634,GO:0005694,GO:0005730,GO:0006139,GO:0006355,GO:0006356,GO:0006364,GO:0006396,GO:0006725,GO:0006807,GO:0008150,GO:0008152,GO:0009889,GO:0009891,GO:0009893,GO:0009987,GO:0010467,GO:0010468,GO:0010556,GO:0010557,GO:0010604,GO:0010628,GO:0016070,GO:0016072,GO:0019219,GO:0019222,GO:…	ko:K14546	ko03008,map03008	Utp12	OTHER
93896	By matching	By matching	By MS/MS	By MS/MS	By MS/MS	By MS/MS	By MS/MS	By MS/MS	By matching	By MS/MS	By MS/MS	By matching	89476000	92199000	89511000	74189000	69012000	73283000	86982000	90719000	80992000	49074000	74335000	58374000	52715000	54674000	55098000	48918000	0	0	0	0	47398000	0	36672000	0	5207.AAW41284	9.75e-259	724	KOG0310@1|root,KOG0310@2759|Eukaryota,3926I@33154|Opisthokonta,3NXEF@4751|Fungi,3UZFB@5204|Basidiomycota,3VEHV@5234|Tremellales	4751|Fungi	S	WD domain, G-beta repeat	utp15	GO:0000462,GO:0000785,GO:0000792,GO:0003674,GO:0003676,GO:0003723,GO:0005488,GO:0005575,GO:0005622,GO:0005623,GO:0005634,GO:0005694,GO:0005730,GO:0006139,GO:0006355,GO:0006356,GO:0006364,GO:0006396,GO:0006725,GO:0006807,GO:0008150,GO:0008152,GO:0009889,GO:0009891,GO:0009893,GO:0009987,GO:0010467,GO:0010468,GO:0010556,GO:0010557,GO:0010604,GO:0010628,GO:0016070,GO:0016072,GO:0019219,GO:0019222,GO:…	ko:K14549	ko03008,map03008	UTP15_C,WD40	OTHER
94572	By matching	By MS/MS	By MS/MS	By matching	By matching	By MS/MS	By matching	By matching	By matching	By matching	NA	By matching	41176000	58916000	84886000	69537000	54558000	93800000	65350000	93864000	52331000	70581000	0	70489000	0	0	0	0	0	0	0	0	0	0	0	0	5207.AAW45405	7.4e-91	268	COG5078@1|root,KOG0424@2759|Eukaryota,3902P@33154|Opisthokonta,3P1T8@4751|Fungi,3V0IG@5204|Basidiomycota,3VF8Q@5234|Tremellales	4751|Fungi	O	Ubiquitin-conjugating enzyme E2, catalytic domain homologues	hus5	GO:0000022,GO:0000070,GO:0000226,GO:0000228,GO:0000278,GO:0000280,GO:0000785,GO:0000790,GO:0000792,GO:0000793,GO:0000794,GO:0000819,GO:0003674,GO:0003824,GO:0005575,GO:0005622,GO:0005623,GO:0005634,GO:0005694,GO:0005720,GO:0005737,GO:0006464,GO:0006807,GO:0006996,GO:0007010,GO:0007017,GO:0007049,GO:0007051,GO:0007052,GO:0007059,GO:0008150,GO:0008152,GO:0008641,GO:0009987,GO:0016043,GO:0016740,GO:…	ko:K10577	ko03013,ko04064,ko04120,ko05206,map03013,map04064,map04120,map05206	UQ_con	OTHER
94904	By matching	By MS/MS	NA	By MS/MS	By matching	NA	By matching	By matching	NA	NA	By matching	By matching	36436000	19084000	0	25631000	23744000	0	18610000	17618000	0	0	16812000	15714000	0	0	0	0	0	0	0	0	0	0	0	0	82508.K1W5P3	7.28e-122	369	2CXG9@1|root,2RX84@2759|Eukaryota,39UXY@33154|Opisthokonta,3NXUI@4751|Fungi,3V1TV@5204|Basidiomycota,3VEXE@5234|Tremellales	4751|Fungi	S	Transcriptional regulator of RNA polII, SAGA, subunit	NA	GO:0000123,GO:0000124,GO:0003674,GO:0003712,GO:0003713,GO:0005575,GO:0005622,GO:0005623,GO:0005634,GO:0005654,GO:0005671,GO:0006139,GO:0006325,GO:0006338,GO:0006351,GO:0006355,GO:0006357,GO:0006366,GO:0006464,GO:0006473,GO:0006475,GO:0006725,GO:0006807,GO:0006996,GO:0008150,GO:0008152,GO:0009058,GO:0009059,GO:0009889,GO:0009891,GO:0009893,GO:0009987,GO:0010467,GO:0010468,GO:0010556,GO:0010557,GO:…	ko:K11362	NA	SAGA-Tad1	OTHER
96030	By matching	By matching	By matching	NA	NA	NA	NA	NA	By MS/MS	By MS/MS	By MS/MS	By MS/MS	39559000	16177000	18309000	0	0	0	0	0	171590000	155470000	263000000	280980000	53605000	0	0	0	0	0	0	0	104220000	95700000	119170000	129460000	82508.K1VQR2	7.2e-175	509	COG0477@1|root,KOG2533@2759|Eukaryota,39K3V@33154|Opisthokonta,3NWTF@4751|Fungi,3UYPY@5204|Basidiomycota,3VHII@5234|Tremellales	4751|Fungi	G	Major Facilitator Superfamily	NA	NA	NA	NA	MFS_1	OTHER
96791	By MS/MS	By MS/MS	By matching	By MS/MS	By matching	By MS/MS	By MS/MS	By matching	By MS/MS	By MS/MS	By matching	By matching	31567000	74814000	62982000	44920000	76332000	51982000	88003000	83167000	57223000	70345000	72833000	79307000	0	0	0	0	0	0	0	0	0	0	0	0	NA	NA	NA	NA	NA	NA	NA	NA	NA	NA	NA	NA	OTHER
98734	NA	NA	By matching	By matching	By MS/MS	By matching	By MS/MS	By MS/MS	By matching	By matching	By matching	By matching	0	0	3737100	4560000	20602000	25057000	7527200	30810000	5116600	4585800	4796000	6846000	0	0	0	0	0	0	0	0	0	0	0	0	5217.XP_007008014.1	3.26e-219	637	KOG2215@1|root,KOG2215@2759|Eukaryota,38BEF@33154|Opisthokonta,3NXG5@4751|Fungi,3UZ3I@5204|Basidiomycota,3VD5R@5234|Tremellales	4751|Fungi	U	Nuclear mRNA splicing	EXO84	GO:0000131,GO:0000145,GO:0000245,GO:0000375,GO:0000377,GO:0000398,GO:0001927,GO:0005575,GO:0005622,GO:0005623,GO:0005628,GO:0005737,GO:0005933,GO:0005934,GO:0005935,GO:0005937,GO:0005938,GO:0006139,GO:0006396,GO:0006397,GO:0006725,GO:0006807,GO:0006810,GO:0006886,GO:0006887,GO:0006892,GO:0006893,GO:0006903,GO:0006904,GO:0008104,GO:0008150,GO:0008152,GO:0008380,GO:0009987,GO:0010467,GO:0015031,GO:…	ko:K19986	NA	Exo84_C,Vps51	OTHER
99280	By MS/MS	By MS/MS	By MS/MS	By MS/MS	By MS/MS	By MS/MS	By MS/MS	By MS/MS	By MS/MS	By MS/MS	By MS/MS	By MS/MS	369830000	583850000	482790000	375590000	1133300000	915010000	1298800000	1145200000	671910000	637480000	711180000	653780000	161440000	199810000	151820000	167060000	236860000	229260000	231100000	231170000	282130000	251310000	229240000	206480000	82508.K1WHW4	7.92e-61	192	COG0222@1|root,KOG1715@2759|Eukaryota,3A5P9@33154|Opisthokonta,3P1TG@4751|Fungi,3V1BT@5204|Basidiomycota,3VFWK@5234|Tremellales	4751|Fungi	J	Ribosomal protein L7/L12 C-terminal domain	MNP1	GO:0000313,GO:0000315,GO:0003674,GO:0003735,GO:0005198,GO:0005575,GO:0005622,GO:0005623,GO:0005737,GO:0005739,GO:0005759,GO:0005761,GO:0005762,GO:0005840,GO:0006412,GO:0006518,GO:0006807,GO:0008150,GO:0008152,GO:0009058,GO:0009059,GO:0009295,GO:0009987,GO:0010467,GO:0015934,GO:0019538,GO:0031974,GO:0032543,GO:0032991,GO:0034641,GO:0034645,GO:0042645,GO:0043043,GO:0043170,GO:0043226,GO:0043227,GO:…	ko:K02935	ko03010,map03010	Ribosomal_L12,Ribosomal_L12_N	OTHER
99369	By MS/MS	By MS/MS	By MS/MS	By MS/MS	By MS/MS	By matching	By MS/MS	By MS/MS	By MS/MS	By MS/MS	By MS/MS	By matching	152120000	126940000	142290000	138340000	135860000	66157000	87365000	138110000	121990000	153770000	144690000	119080000	68408000	59069000	66812000	66695000	50641000	39510000	84679000	43933000	62026000	70955000	60194000	53046000	82508.K1W4I7	0	2231	COG0086@1|root,KOG0261@2759|Eukaryota,38G14@33154|Opisthokonta,3NXKP@4751|Fungi,3UZ6M@5204|Basidiomycota,3VDIB@5234|Tremellales	4751|Fungi	H	DNA-dependent RNA polymerase catalyzes the transcription of DNA into RNA using the four ribonucleoside triphosphates as substrates	RPO31	GO:0000428,GO:0003674,GO:0003824,GO:0003899,GO:0005575,GO:0005622,GO:0005623,GO:0005634,GO:0005654,GO:0005666,GO:0006139,GO:0006351,GO:0006383,GO:0006399,GO:0006725,GO:0006807,GO:0008150,GO:0008152,GO:0009058,GO:0009059,GO:0009304,GO:0009987,GO:0010467,GO:0016070,GO:0016740,GO:0016772,GO:0016779,GO:0018130,GO:0019438,GO:0030880,GO:0031974,GO:0031981,GO:0032774,GO:0032991,GO:0034062,GO:0034641,GO:…	ko:K03018,ko:K21594	ko00230,ko00240,ko01100,ko03020,ko04623,ko05169,map00230,map00240,map01100,map03020,map04623,map05169	RNA_pol_Rpb1_1,RNA_pol_Rpb1_2,RNA_pol_Rpb1_3,RNA_pol_Rpb1_4,RNA_pol_Rpb1_5	OTHER
100448	By MS/MS	By MS/MS	By MS/MS	By MS/MS	By MS/MS	By MS/MS	By MS/MS	By MS/MS	By MS/MS	By MS/MS	By MS/MS	By MS/MS	379310000	228100000	282550000	342880000	609690000	421340000	470600000	660810000	474540000	541520000	581950000	522920000	88576000	77156000	76614000	87489000	105170000	94703000	119840000	90690000	129830000	112010000	114650000	103560000	82508.K1W134	1.84e-239	717	KOG1862@1|root,KOG1862@2759|Eukaryota,38UDY@33154|Opisthokonta,3NUVE@4751|Fungi,3V0ZY@5204|Basidiomycota,3VDP6@5234|Tremellales	4751|Fungi	S	GYF domain	SMY2	GO:0005575,GO:0005622,GO:0005623,GO:0005737,GO:0005739,GO:0005783,GO:0005789,GO:0005829,GO:0006810,GO:0006888,GO:0006996,GO:0006997,GO:0008104,GO:0008150,GO:0009987,GO:0012505,GO:0016020,GO:0016043,GO:0016192,GO:0019898,GO:0031081,GO:0031503,GO:0031984,GO:0033036,GO:0034613,GO:0034629,GO:0042175,GO:0043226,GO:0043227,GO:0043229,GO:0043231,GO:0044422,GO:0044424,GO:0044425,GO:0044432,GO:0044444,GO:…	ko:K18730	NA	GYF	OTHER
100505	NA	NA	By matching	By matching	By MS/MS	By MS/MS	By matching	By matching	NA	NA	NA	NA	0	0	19790000	21490000	39262000	0	22592000	24153000	0	0	0	0	0	0	0	0	0	0	0	0	0	0	0	0	82508.K1VED7	7.93e-303	882	COG5141@1|root,KOG0955@2759|Eukaryota,38CQY@33154|Opisthokonta,3NWQ8@4751|Fungi,3UY3T@5204|Basidiomycota,3VCXX@5234|Tremellales	4751|Fungi	FJ	Bromodomain and PHD finger-containing protein 3	NA	GO:0000123,GO:0003674,GO:0003824,GO:0005488,GO:0005515,GO:0005575,GO:0005622,GO:0005623,GO:0005634,GO:0005654,GO:0005737,GO:0006325,GO:0006464,GO:0006473,GO:0006475,GO:0006807,GO:0006996,GO:0008150,GO:0008152,GO:0008270,GO:0009987,GO:0016043,GO:0016569,GO:0016570,GO:0016573,GO:0016740,GO:0018193,GO:0018205,GO:0018393,GO:0018394,GO:0019538,GO:0019787,GO:0031248,GO:0031974,GO:0031981,GO:0032991,GO:…	ko:K11380	NA	Bromodomain,EPL1,PHD_2,PWWP,zf-HC5HC2H_2	OTHER
100513	By MS/MS	By MS/MS	By MS/MS	By MS/MS	By MS/MS	By MS/MS	By MS/MS	By MS/MS	By MS/MS	By MS/MS	By MS/MS	By MS/MS	498520000	452250000	649130000	519810000	892890000	684120000	934490000	1005500000	585290000	549380000	686470000	807370000	176630000	187170000	192600000	182680000	183630000	182610000	210550000	224400000	160560000	162060000	154560000	192620000	5217.XP_007008030.1	1.97e-72	234	KOG0917@1|root,KOG0917@2759|Eukaryota,39RB9@33154|Opisthokonta,3NXYH@4751|Fungi,3V0TK@5204|Basidiomycota,3VGTH@5234|Tremellales	4751|Fungi	S	late endosome to vacuole transport-related protein	NA	GO:0005575,GO:0005622,GO:0005623,GO:0005737,GO:0005768,GO:0005770,GO:0005771,GO:0006810,GO:0007034,GO:0008150,GO:0012505,GO:0016192,GO:0016197,GO:0031410,GO:0031982,GO:0032509,GO:0032511,GO:0043226,GO:0043227,GO:0043229,GO:0044424,GO:0044444,GO:0044464,GO:0045324,GO:0046907,GO:0051179,GO:0051234,GO:0051641,GO:0051649,GO:0071985,GO:0097708	ko:K12199	ko04144,map04144	Vta1	OTHER
100848	NA	By matching	By matching	NA	By MS/MS	By matching	By MS/MS	By MS/MS	NA	By matching	By matching	By matching	0	11288000	15847000	0	68213000	48072000	73274000	62507000	0	11805000	21933000	16289000	0	0	0	0	0	0	0	0	0	0	0	0	5217.XP_007008378.1	8.99e-99	286	COG5030@1|root,KOG0935@2759|Eukaryota,38BNQ@33154|Opisthokonta,3NW9H@4751|Fungi,3V0A8@5204|Basidiomycota,3VF72@5234|Tremellales	4751|Fungi	U	Belongs to the adaptor complexes small subunit family	aps2	GO:0005575,GO:0005622,GO:0005623,GO:0005628,GO:0005634,GO:0005737,GO:0005886,GO:0005905,GO:0005933,GO:0005935,GO:0005938,GO:0006810,GO:0006886,GO:0006897,GO:0006898,GO:0008104,GO:0008150,GO:0012505,GO:0012506,GO:0015031,GO:0015833,GO:0016020,GO:0016192,GO:0030117,GO:0030118,GO:0030119,GO:0030120,GO:0030122,GO:0030125,GO:0030128,GO:0030131,GO:0030132,GO:0030135,GO:0030136,GO:0030139,GO:0030427,GO:…	ko:K11827	ko04144,ko04721,ko04961,ko05016,map04144,map04721,map04961,map05016	Clat_adaptor_s	OTHER
104227	By MS/MS	By MS/MS	By MS/MS	By MS/MS	By MS/MS	By MS/MS	By MS/MS	By MS/MS	By MS/MS	By MS/MS	By matching	By MS/MS	32962000	67186000	253370000	409490000	876430000	855670000	316620000	510390000	254050000	124830000	169630000	398670000	40261000	44847000	85853000	96098000	202100000	202550000	167820000	190370000	140030000	108480000	113460000	89212000	82508.K1WME5	0	1238	COG5099@1|root,KOG2049@2759|Eukaryota,38DCC@33154|Opisthokonta,3NWIS@4751|Fungi,3UXZ7@5204|Basidiomycota,3VCVB@5234|Tremellales	4751|Fungi	J	Pumilio-family RNA binding repeat	NA	GO:0000288,GO:0000956,GO:0001301,GO:0001302,GO:0001304,GO:0001308,GO:0003674,GO:0003676,GO:0003723,GO:0003729,GO:0005488,GO:0005575,GO:0005622,GO:0005623,GO:0005737,GO:0006139,GO:0006325,GO:0006355,GO:0006401,GO:0006402,GO:0006417,GO:0006725,GO:0006807,GO:0006996,GO:0007568,GO:0007569,GO:0008104,GO:0008150,GO:0008152,GO:0009056,GO:0009057,GO:0009889,GO:0009890,GO:0009891,GO:0009892,GO:0009893,GO:…	NA	NA	PUF	OTHER
106447	By matching	By matching	By MS/MS	By matching	By MS/MS	By MS/MS	By MS/MS	By MS/MS	By MS/MS	By matching	By MS/MS	By MS/MS	62484000	65279000	201670000	135420000	348080000	290270000	228200000	160680000	99704000	99820000	229000000	65688000	46896000	47524000	48428000	43259000	84599000	75797000	76632000	52475000	53482000	46456000	49936000	0	5217.XP_007004971.1	0	1118	COG5411@1|root,KOG0566@2759|Eukaryota,38G7Y@33154|Opisthokonta,3NVRN@4751|Fungi,3UYN6@5204|Basidiomycota,3VEHD@5234|Tremellales	4751|Fungi	U	Inositol polyphosphate phosphatase, catalytic domain homologues	syj1	GO:0003674,GO:0003824,GO:0004438,GO:0004439,GO:0004445,GO:0005488,GO:0005509,GO:0005575,GO:0005622,GO:0005623,GO:0005737,GO:0005856,GO:0005937,GO:0005938,GO:0006629,GO:0006644,GO:0006650,GO:0006661,GO:0006793,GO:0006796,GO:0007154,GO:0007165,GO:0008150,GO:0008152,GO:0008610,GO:0008654,GO:0009058,GO:0009987,GO:0015629,GO:0016020,GO:0016311,GO:0016312,GO:0016787,GO:0016788,GO:0016791,GO:0019637,GO:…	ko:K20279	ko00562,ko01100,ko04070,map00562,map01100,map04070	Exo_endo_phos,Syja_N	OTHER
106486	By MS/MS	By MS/MS	By MS/MS	By MS/MS	By MS/MS	By MS/MS	By MS/MS	By MS/MS	By MS/MS	By MS/MS	By MS/MS	By MS/MS	352070000	263810000	444680000	362930000	465910000	386610000	332350000	490790000	332920000	339420000	401690000	357270000	127660000	95151000	128190000	135010000	108420000	109990000	92979000	93780000	113150000	107270000	117520000	102860000	82508.K1VI32	2.2e-143	432	KOG1039@1|root,KOG1039@2759|Eukaryota,39VRV@33154|Opisthokonta,3NXTM@4751|Fungi,3V1IP@5204|Basidiomycota,3VEFU@5234|Tremellales	4751|Fungi	O	Zinc finger C-x8-C-x5-C-x3-H type (and similar)	NA	NA	ko:K14404	ko03015,ko05164,map03015,map05164	zf-CCCH	OTHER
106569	By MS/MS	By MS/MS	By matching	By matching	By matching	By MS/MS	By matching	By matching	By matching	By matching	By matching	By matching	83469000	106270000	103040000	116350000	57613000	92483000	106210000	113960000	109400000	61333000	142320000	133170000	51537000	59167000	54640000	62589000	0	44609000	50025000	49077000	57153000	0	60010000	61192000	82508.K1WCC8	1.34e-171	490	COG1237@1|root,2RYVC@2759|Eukaryota,39VS7@33154|Opisthokonta,3P0Q4@4751|Fungi,3UZZU@5204|Basidiomycota,3VFHJ@5234|Tremellales	4751|Fungi	S	metallo-beta-lactamase superfamily protein	NA	NA	ko:K06897	ko00790,map00790	Lactamase_B	OTHER
107732	By MS/MS	By MS/MS	By MS/MS	By MS/MS	By MS/MS	By MS/MS	By matching	By MS/MS	By MS/MS	By MS/MS	By MS/MS	By MS/MS	134670000	96194000	88663000	92575000	162990000	197440000	99595000	274720000	94007000	110120000	151150000	139550000	46911000	55171000	43975000	54287000	63502000	75779000	0	68714000	49948000	53576000	65641000	65438000	82508.K1W4S4	9.07e-175	494	KOG2445@1|root,KOG2445@2759|Eukaryota,38GGF@33154|Opisthokonta,3NU37@4751|Fungi,3V1J9@5204|Basidiomycota,3VEAE@5234|Tremellales	4751|Fungi	U	WD domain, G-beta repeat	SEH1	GO:0000306,GO:0000322,GO:0000323,GO:0000324,GO:0000329,GO:0003674,GO:0005198,GO:0005575,GO:0005622,GO:0005623,GO:0005634,GO:0005635,GO:0005643,GO:0005737,GO:0005773,GO:0005774,GO:0006403,GO:0006405,GO:0006407,GO:0006611,GO:0006810,GO:0006886,GO:0006913,GO:0008104,GO:0008150,GO:0009966,GO:0009967,GO:0010646,GO:0010647,GO:0012505,GO:0015031,GO:0015833,GO:0015931,GO:0016020,GO:0016021,GO:0017056,GO:…	ko:K14299	ko03013,ko04150,map03013,map04150	WD40	OTHER
109385	By MS/MS	By MS/MS	By MS/MS	By MS/MS	By MS/MS	By MS/MS	By MS/MS	By MS/MS	By MS/MS	By MS/MS	By MS/MS	By MS/MS	379980000	331460000	413660000	301620000	536630000	403580000	523360000	478380000	343850000	452890000	363340000	364570000	153600000	139110000	148850000	134650000	123360000	123100000	122090000	108540000	130260000	151690000	113750000	125730000	82508.K1VS68	3.69e-157	461	COG0172@1|root,KOG2509@2759|Eukaryota,38HQ3@33154|Opisthokonta,3NV6W@4751|Fungi,3UZXY@5204|Basidiomycota,3VCWH@5234|Tremellales	4751|Fungi	J	Seryl-tRNA synthetase N-terminal domain	DIA4	GO:0000166,GO:0000959,GO:0003674,GO:0003824,GO:0004812,GO:0004828,GO:0005488,GO:0005524,GO:0005575,GO:0005622,GO:0005623,GO:0005737,GO:0005739,GO:0006082,GO:0006139,GO:0006399,GO:0006412,GO:0006418,GO:0006434,GO:0006518,GO:0006520,GO:0006725,GO:0006807,GO:0008144,GO:0008150,GO:0008152,GO:0009058,GO:0009059,GO:0009987,GO:0010467,GO:0016070,GO:0016874,GO:0016875,GO:0017076,GO:0019538,GO:0019752,GO:…	ko:K01875	ko00970,map00970	Seryl_tRNA_N,tRNA-synt_2b	OTHER
110363	By MS/MS	By MS/MS	By MS/MS	By MS/MS	By MS/MS	By MS/MS	By MS/MS	By MS/MS	By MS/MS	By MS/MS	By MS/MS	By MS/MS	1820100000	2235900000	1998300000	1814800000	1625700000	1420800000	1193500000	1205300000	1488500000	2182900000	2419900000	1756600000	1350300000	1600500000	1249200000	1384800000	907810000	888150000	687920000	573960000	1063100000	1378900000	1481900000	1191600000	5207.AAW44248	1.34e-51	162	KOG3057@1|root,KOG3057@2759|Eukaryota,3A5X8@33154|Opisthokonta,3P5BS@4751|Fungi,3V1T2@5204|Basidiomycota,3VFXS@5234|Tremellales	4751|Fungi	C	This protein is one of the nuclear-coded polypeptide chains of cytochrome c oxidase, the terminal oxidase in mitochondrial electron transport	COX12	GO:0005575,GO:0005622,GO:0005623,GO:0005737,GO:0005739,GO:0005740,GO:0005743,GO:0005746,GO:0005751,GO:0005758,GO:0006996,GO:0007005,GO:0008150,GO:0008535,GO:0009987,GO:0016020,GO:0016021,GO:0016043,GO:0017004,GO:0019866,GO:0022607,GO:0031090,GO:0031224,GO:0031966,GO:0031967,GO:0031970,GO:0031974,GO:0031975,GO:0032991,GO:0033108,GO:0033617,GO:0034622,GO:0043226,GO:0043227,GO:0043229,GO:0043231,GO:…	ko:K02267	ko00190,ko01100,ko04260,ko04714,ko04932,ko05010,ko05012,ko05016,map00190,map01100,map04260,map04714,map04932,map05010,map05012,map05016	COX6B	OTHER
110914	By matching	By matching	By MS/MS	By matching	By MS/MS	By MS/MS	By MS/MS	By matching	By MS/MS	By MS/MS	By MS/MS	By MS/MS	43970000	35261000	72098000	83902000	97122000	78729000	95107000	85989000	70394000	78101000	55613000	77115000	0	0	0	0	31772000	0	30765000	0	30747000	31437000	0	29773000	82508.K1VFK5	1.87e-291	821	KOG1450@1|root,KOG4407@1|root,KOG1450@2759|Eukaryota,KOG4407@2759|Eukaryota,38HAS@33154|Opisthokonta,3Q53H@4751|Fungi,3VCEC@5204|Basidiomycota,3VCRF@5234|Tremellales	4751|Fungi	T	Fes/CIP4, and EFC/F-BAR homology domain	NA	NA	ko:K20643	NA	FCH,RhoGAP	OTHER
111451	By MS/MS	By MS/MS	By MS/MS	By MS/MS	By MS/MS	By MS/MS	By MS/MS	By MS/MS	By MS/MS	By MS/MS	By MS/MS	By MS/MS	11685000000	13903000000	10702000000	14008000000	16241000000	17572000000	17423000000	20744000000	13914000000	14638000000	15366000000	12080000000	3388200000	3336400000	2937200000	3435100000	2171100000	2816000000	2518300000	2299600000	3082600000	2871800000	2681500000	3184400000	82508.K1VJ25	1.74e-110	323	COG0605@1|root,KOG0876@2759|Eukaryota,39RWZ@33154|Opisthokonta,3NZVT@4751|Fungi,3VBU6@5204|Basidiomycota	4751|Fungi	Q	Destroys radicals which are normally produced within the cells and which are toxic to biological systems	sodB	GO:0003674,GO:0005488,GO:0005575,GO:0005622,GO:0005623,GO:0005737,GO:0005739,GO:0005759,GO:0019863,GO:0019865,GO:0030145,GO:0031974,GO:0043167,GO:0043169,GO:0043226,GO:0043227,GO:0043229,GO:0043231,GO:0043233,GO:0044422,GO:0044424,GO:0044429,GO:0044444,GO:0044446,GO:0044464,GO:0044877,GO:0046872,GO:0046914,GO:0070013	ko:K04564	ko04013,ko04068,ko04146,ko04211,ko04212,ko04213,ko05016,map04013,map04068,map04146,map04211,map04212,map04213,map05016	Sod_Fe_C,Sod_Fe_N	OTHER
112154	NA	NA	NA	NA	By MS/MS	By MS/MS	By MS/MS	By MS/MS	NA	NA	NA	NA	0	0	0	0	76799000	59045000	86024000	88547000	0	0	0	0	0	0	0	0	0	0	0	0	0	0	0	0	NA	NA	NA	NA	NA	NA	NA	NA	NA	NA	NA	NA	OTHER
112190	By MS/MS	By matching	By MS/MS	By MS/MS	NA	By matching	NA	By MS/MS	By MS/MS	By MS/MS	NA	By MS/MS	19637000	20388000	31452000	17761000	0	12390000	0	16219000	21922000	20406000	0	25661000	0	0	0	0	0	0	0	0	0	0	0	0	NA	NA	NA	NA	NA	NA	NA	NA	NA	NA	NA	NA	OTHER
112361	By MS/MS	By MS/MS	By MS/MS	By MS/MS	By MS/MS	By MS/MS	By MS/MS	By MS/MS	By MS/MS	By MS/MS	By MS/MS	By MS/MS	271050000	291420000	361910000	311780000	1333800000	717990000	1227100000	1224000000	251580000	308970000	368480000	347900000	117890000	110850000	131980000	140690000	290570000	312110000	288220000	236480000	107780000	119810000	117560000	141360000	552467.XP_003192938.1	1.99e-127	364	KOG0078@1|root,KOG0078@2759|Eukaryota,38GT3@33154|Opisthokonta,3NXRR@4751|Fungi,3UZ7S@5204|Basidiomycota,3VDVG@5234|Tremellales	4751|Fungi	U	Rab subfamily of small GTPases	SEC4	GO:0000003,GO:0000131,GO:0000166,GO:0000910,GO:0001411,GO:0001882,GO:0001883,GO:0002790,GO:0003006,GO:0003674,GO:0003824,GO:0003924,GO:0005488,GO:0005525,GO:0005575,GO:0005622,GO:0005623,GO:0005628,GO:0005737,GO:0005739,GO:0005740,GO:0005741,GO:0005768,GO:0005783,GO:0005815,GO:0005816,GO:0005856,GO:0005886,GO:0005933,GO:0005934,GO:0005935,GO:0005937,GO:0006810,GO:0006886,GO:0006887,GO:0006892,GO:…	ko:K07901,ko:K18158	ko04144,ko04152,ko04530,ko04972,map04144,map04152,map04530,map04972	Ras	OTHER
113442	By MS/MS	By MS/MS	By MS/MS	By MS/MS	By MS/MS	By MS/MS	By MS/MS	By MS/MS	By MS/MS	By MS/MS	By MS/MS	By MS/MS	375990000	423680000	861350000	981080000	1154700000	840060000	945370000	1260300000	503370000	471970000	581320000	541250000	186770000	179520000	254500000	274390000	196870000	232890000	214460000	218240000	154310000	134170000	164250000	207170000	82508.K1VHM0	3.48e-223	624	COG0024@1|root,KOG2775@2759|Eukaryota,38BDD@33154|Opisthokonta,3NUPF@4751|Fungi,3UZ8N@5204|Basidiomycota,3VCPN@5234|Tremellales	4751|Fungi	J	Cotranslationally removes the N-terminal methionine from nascent proteins. The N-terminal methionine is often cleaved when the second residue in the primary sequence is small and uncharged (Met-Ala-, Cys, Gly, Pro, Ser, Thr, or Val)	MAP2	GO:0003674,GO:0003824,GO:0004177,GO:0005575,GO:0005622,GO:0005623,GO:0005634,GO:0005737,GO:0006464,GO:0006508,GO:0006807,GO:0008150,GO:0008152,GO:0008233,GO:0008235,GO:0008237,GO:0008238,GO:0009987,GO:0010467,GO:0016485,GO:0016787,GO:0019538,GO:0035551,GO:0036211,GO:0043170,GO:0043226,GO:0043227,GO:0043229,GO:0043231,GO:0043412,GO:0044237,GO:0044238,GO:0044260,GO:0044267,GO:0044424,GO:0044464,GO:…	ko:K01265	NA	Peptidase_M24	OTHER
114191	NA	NA	NA	NA	By MS/MS	By MS/MS	By MS/MS	By MS/MS	NA	NA	NA	NA	0	0	0	0	56342000	39531000	42113000	67388000	0	0	0	0	0	0	0	0	0	0	0	0	0	0	0	0	NA	NA	NA	NA	NA	NA	NA	NA	NA	NA	NA	NA	OTHER
115023	By matching	By matching	By matching	NA	By matching	By MS/MS	By matching	By matching	NA	NA	NA	NA	18532000	17962000	20258000	0	73476000	77250000	82913000	97821000	0	0	0	0	0	0	0	0	0	0	0	0	0	0	0	0	5207.AAW41320	2.14e-75	226	KOG1654@1|root,KOG1654@2759|Eukaryota,3A1NV@33154|Opisthokonta,3P2RB@4751|Fungi,3V0WB@5204|Basidiomycota,3VFV2@5234|Tremellales	4751|Fungi	Z	The ATG8	ATG8	GO:0000045,GO:0000322,GO:0000323,GO:0000324,GO:0000329,GO:0000407,GO:0000422,GO:0003674,GO:0005488,GO:0005543,GO:0005575,GO:0005622,GO:0005623,GO:0005737,GO:0005773,GO:0005774,GO:0005776,GO:0005829,GO:0006605,GO:0006623,GO:0006810,GO:0006886,GO:0006888,GO:0006914,GO:0006950,GO:0006995,GO:0006996,GO:0007005,GO:0007033,GO:0007034,GO:0007154,GO:0008104,GO:0008150,GO:0008152,GO:0008289,GO:0008429,GO:…	ko:K08341	ko04068,ko04136,ko04137,ko04138,ko04139,ko04140,ko04212,ko04371,ko04621,ko04727,ko05167,map04068,map04136,map04137,map04138,map04139,map04140,map04212,map04371,map04621,map04727,map05167	Atg8	OTHER
115279	By MS/MS	By MS/MS	By matching	By MS/MS	By matching	By MS/MS	By MS/MS	By matching	By matching	By matching	By MS/MS	By MS/MS	69168000	74605000	69201000	72760000	42499000	33162000	48209000	51051000	45054000	64500000	123290000	147650000	47700000	0	0	64768000	0	0	34554000	0	0	0	42201000	50185000	5507.FOXG_09912P0	5.47e-92	295	COG2272@1|root,KOG1516@2759|Eukaryota,38EQ2@33154|Opisthokonta,3NX7C@4751|Fungi,3QR31@4890|Ascomycota,217W8@147550|Sordariomycetes,3TPIJ@5125|Hypocreales,1FWCR@110618|Nectriaceae	4751|Fungi	I	Belongs to the type-B carboxylesterase lipase family	NA	GO:0003674,GO:0003824,GO:0016787,GO:0016788,GO:0052689	NA	NA	COesterase,DnaJ,zf-CSL	OTHER
116961	By MS/MS	By matching	By MS/MS	By MS/MS	By MS/MS	By MS/MS	By MS/MS	By MS/MS	By MS/MS	By MS/MS	By MS/MS	By MS/MS	38653000	73908000	71208000	64097000	99155000	84132000	92308000	126610000	89321000	97158000	88462000	82277000	0	52983000	68463000	36214000	43415000	31317000	46230000	65796000	93218000	86452000	82763000	74575000	5207.AAW42470	7.32e-60	195	KOG3238@1|root,KOG3238@2759|Eukaryota,39KM6@33154|Opisthokonta,3P7BK@4751|Fungi,3V26R@5204|Basidiomycota,3VG0G@5234|Tremellales	4751|Fungi	S	Regulator of volume decrease after cellular swelling	NA	NA	ko:K05019	ko03013,map03013	Voldacs	OTHER
117915	By MS/MS	By MS/MS	By MS/MS	By MS/MS	By MS/MS	By MS/MS	By MS/MS	By MS/MS	By MS/MS	By MS/MS	By MS/MS	By MS/MS	625460000	1225800000	1162500000	898570000	1167000000	891830000	1023800000	1048000000	947950000	1024500000	1049700000	1270800000	162200000	208780000	238340000	238250000	164640000	156240000	171970000	145500000	184890000	192850000	199070000	220360000	82508.K1WS39	2.81e-60	204	KOG0118@1|root,KOG0118@2759|Eukaryota,38H0V@33154|Opisthokonta,3P5PC@4751|Fungi,3V184@5204|Basidiomycota,3VFF1@5234|Tremellales	4751|Fungi	A	RNA recognition motif. (a.k.a. RRM, RBD, or RNP domain)	NA	NA	ko:K12897	ko03040,map03040	RRM_1	OTHER
118348	By MS/MS	By MS/MS	By MS/MS	By MS/MS	By MS/MS	By MS/MS	By MS/MS	By MS/MS	By MS/MS	By MS/MS	By MS/MS	By MS/MS	518540000	427780000	434670000	346480000	718200000	550390000	751730000	752630000	608350000	637710000	555030000	540740000	243890000	250270000	205720000	224500000	356220000	275540000	334080000	237130000	253850000	215320000	196340000	222920000	82508.K1WR42	7.16e-264	730	COG0639@1|root,KOG0374@2759|Eukaryota,38BGF@33154|Opisthokonta,3NUEW@4751|Fungi,3UZJJ@5204|Basidiomycota,3VET7@5234|Tremellales	4751|Fungi	T	Serine-threonine protein phosphatase N-terminal domain	pzh1	GO:0000322,GO:0000323,GO:0000324,GO:0003674,GO:0003824,GO:0004721,GO:0004722,GO:0005575,GO:0005622,GO:0005623,GO:0005634,GO:0005737,GO:0005773,GO:0005886,GO:0006464,GO:0006470,GO:0006793,GO:0006796,GO:0006807,GO:0006873,GO:0006875,GO:0006883,GO:0007154,GO:0007165,GO:0008104,GO:0008150,GO:0008152,GO:0009987,GO:0016020,GO:0016311,GO:0016787,GO:0016788,GO:0016791,GO:0019538,GO:0019725,GO:0019897,GO:…	ko:K06269	ko03015,ko04022,ko04024,ko04113,ko04114,ko04218,ko04261,ko04270,ko04390,ko04510,ko04611,ko04720,ko04728,ko04750,ko04810,ko04910,ko04921,ko04931,ko05031,ko05034,ko05168,ko05205,map03015,map04022,map04024,map04113,map04114,map04218,map04261,map04270,map04390,map04510,map04611,map04720,map04728,map04750,map04810,map04910,map04921,map04931,map05031,map05034,map05168,map05205	Metallophos,STPPase_N	OTHER
118457	By MS/MS	By MS/MS	By MS/MS	By MS/MS	By MS/MS	By MS/MS	By MS/MS	By MS/MS	By MS/MS	By MS/MS	By MS/MS	By MS/MS	11459000000	11834000000	10880000000	9552300000	19012000000	14927000000	18687000000	18073000000	9201700000	10176000000	9820500000	9270900000	3371200000	3518100000	4010000000	3758600000	5063000000	4653300000	5257700000	4827400000	3479400000	3233400000	3675800000	3129400000	5207.AAW42579	4.69e-88	260	COG5126@1|root,KOG0027@2759|Eukaryota,38ETU@33154|Opisthokonta,3NVWG@4751|Fungi,3UY02@5204|Basidiomycota,3VGCZ@5234|Tremellales	4751|Fungi	T	EF-hand domain	NA	GO:0000003,GO:0003006,GO:0003674,GO:0005488,GO:0005509,GO:0005575,GO:0005622,GO:0005623,GO:0005628,GO:0005737,GO:0005856,GO:0005937,GO:0005938,GO:0006928,GO:0007049,GO:0008150,GO:0009653,GO:0009987,GO:0010927,GO:0015629,GO:0016020,GO:0016043,GO:0016459,GO:0016461,GO:0019953,GO:0022402,GO:0022413,GO:0022414,GO:0022607,GO:0030029,GO:0030048,GO:0030154,GO:0030427,GO:0030435,GO:0030437,GO:0031097,GO:…	ko:K02183	ko04014,ko04015,ko04016,ko04020,ko04022,ko04024,ko04070,ko04114,ko04218,ko04261,ko04270,ko04371,ko04626,ko04713,ko04720,ko04722,ko04728,ko04740,ko04744,ko04745,ko04750,ko04910,ko04912,ko04915,ko04916,ko04921,ko04922,ko04924,ko04925,ko04970,ko04971,ko05010,ko05031,ko05034,ko05133,ko05152,ko05167,ko05200,ko05214,ko05418,map04014,map04015,map04016,map04020,map04022,map04024,map04070,map04114,map0421…	EF-hand_1,EF-hand_5,EF-hand_7	OTHER
119430	By matching	By matching	By MS/MS	By MS/MS	By MS/MS	By MS/MS	By MS/MS	By MS/MS	By MS/MS	By MS/MS	By MS/MS	By MS/MS	102930000	173820000	212020000	200280000	225620000	266600000	252500000	401230000	146340000	100870000	278380000	148250000	35572000	54982000	73709000	64634000	56689000	58553000	54877000	76299000	47723000	43938000	102180000	49728000	82508.K1VG28	1.62e-158	455	KOG1667@1|root,KOG1667@2759|Eukaryota,38BRW@33154|Opisthokonta,3NVNP@4751|Fungi,3UZVJ@5204|Basidiomycota,3VD6A@5234|Tremellales	4751|Fungi	S	CHORD	NA	NA	NA	NA	CHORD,CS	OTHER
119469	By MS/MS	By MS/MS	By MS/MS	By MS/MS	By MS/MS	By MS/MS	By MS/MS	By MS/MS	By MS/MS	By MS/MS	By MS/MS	By MS/MS	417740000	380720000	466470000	488540000	18013000000	16261000000	20576000000	23231000000	832930000	841220000	939690000	732080000	60412000	38899000	44155000	101980000	2169500000	3831800000	2464700000	2584300000	135120000	76739000	148030000	75653000	82508.K1VKK6	5.53e-291	799	COG0334@1|root,KOG2250@2759|Eukaryota,38GEK@33154|Opisthokonta,3NVMC@4751|Fungi,3UYR6@5204|Basidiomycota,3VDP8@5234|Tremellales	4751|Fungi	E	Belongs to the Glu Leu Phe Val dehydrogenases family	GDH3	GO:0001505,GO:0003674,GO:0003824,GO:0004353,GO:0004354,GO:0005575,GO:0005576,GO:0005622,GO:0005623,GO:0005634,GO:0005737,GO:0005739,GO:0005829,GO:0006082,GO:0006520,GO:0006536,GO:0006537,GO:0006541,GO:0006807,GO:0008150,GO:0008152,GO:0008652,GO:0009058,GO:0009064,GO:0009084,GO:0009987,GO:0010033,GO:0016053,GO:0016491,GO:0016638,GO:0016639,GO:0017144,GO:0019676,GO:0019740,GO:0019752,GO:0030447,GO:…	ko:K00262	ko00220,ko00250,ko00910,ko01100,map00220,map00250,map00910,map01100	ELFV_dehydrog,ELFV_dehydrog_N	OTHER
121897	By MS/MS	By matching	By matching	By MS/MS	By MS/MS	By MS/MS	By MS/MS	By matching	By MS/MS	By matching	By MS/MS	By MS/MS	73390000	65155000	52378000	62973000	123370000	192710000	176530000	184960000	113660000	98259000	50717000	15133000	39395000	37288000	0	0	0	85612000	0	0	43448000	39794000	0	0	82508.K1VFZ5	2.41e-29	124	COG5641@1|root,KOG1601@2759|Eukaryota,3AAYE@33154|Opisthokonta,3P85Y@4751|Fungi,3V75X@5204|Basidiomycota,3VG17@5234|Tremellales	4751|Fungi	K	zinc finger binding to DNA consensus sequence [AT]GATA[AG]	NA	NA	NA	NA	GATA	OTHER
123499	By MS/MS	By matching	NA	By MS/MS	By MS/MS	By matching	By MS/MS	By MS/MS	By matching	By matching	By matching	By matching	75362000	66054000	0	83352000	157580000	46923000	222730000	181000000	26527000	73096000	93011000	126660000	0	54937000	0	54650000	71156000	0	160190000	69885000	35089000	49235000	52940000	61619000	5217.XP_007008136.1	8.63e-214	615	COG2016@1|root,KOG2522@2759|Eukaryota,38CPE@33154|Opisthokonta,3NUKR@4751|Fungi,3V0KM@5204|Basidiomycota,3VCY9@5234|Tremellales	4751|Fungi	J	Translation initiation factor SUI1	NA	GO:0001731,GO:0002181,GO:0002183,GO:0002190,GO:0002192,GO:0003674,GO:0003676,GO:0003723,GO:0003743,GO:0005488,GO:0006139,GO:0006364,GO:0006396,GO:0006412,GO:0006413,GO:0006518,GO:0006725,GO:0006807,GO:0008135,GO:0008150,GO:0008152,GO:0009058,GO:0009059,GO:0009987,GO:0010467,GO:0016043,GO:0016070,GO:0016072,GO:0019538,GO:0022607,GO:0022613,GO:0022618,GO:0034470,GO:0034622,GO:0034641,GO:0034645,GO:…	ko:K15027	NA	SUI1,SWIB	OTHER
127447	By matching	By MS/MS	By matching	By matching	By MS/MS	By MS/MS	By matching	By matching	By MS/MS	By matching	By matching	By matching	23981000	18832000	22665000	22252000	41240000	2018600000	24169000	27153000	26315000	25194000	24803000	20634000	0	0	0	0	0	0	0	0	0	0	0	0	5217.XP_007003680.1	7.12e-177	519	KOG1947@1|root,KOG1947@2759|Eukaryota,3929C@33154|Opisthokonta,3NZ1M@4751|Fungi,3UYN0@5204|Basidiomycota,3VDYN@5234|Tremellales	4751|Fungi	S	Leucine-rich repeats, outliers	RAD7	GO:0000109,GO:0000113,GO:0000151,GO:0000715,GO:0005575,GO:0005622,GO:0005623,GO:0005634,GO:0006139,GO:0006259,GO:0006281,GO:0006289,GO:0006725,GO:0006807,GO:0006950,GO:0006974,GO:0006996,GO:0008104,GO:0008150,GO:0008152,GO:0009987,GO:0016043,GO:0031461,GO:0031463,GO:0032991,GO:0033036,GO:0033554,GO:0034613,GO:0034641,GO:0043170,GO:0043226,GO:0043227,GO:0043229,GO:0043231,GO:0044237,GO:0044238,GO:…	ko:K15082	NA	LRR_6	OTHER
127698	By MS/MS	By MS/MS	By MS/MS	By MS/MS	By MS/MS	By MS/MS	By MS/MS	By MS/MS	By MS/MS	By MS/MS	By MS/MS	By MS/MS	3673000000	4304600000	4786800000	4100000000	5771400000	3952100000	5617500000	6144400000	4434600000	4554100000	5275500000	4454100000	605640000	612560000	645550000	540090000	594620000	501020000	599220000	545900000	622110000	617770000	582440000	623250000	82508.K1VIG1	0	1006	COG1028@1|root,KOG3677@1|root,KOG1208@2759|Eukaryota,KOG3677@2759|Eukaryota,38IDV@33154|Opisthokonta,3NV6Y@4751|Fungi,3UY6Z@5204|Basidiomycota,3VD2P@5234|Tremellales	4751|Fungi	J	component of the eukaryotic translation initiation factor 3 (eIF-3) complex, which is involved in protein synthesis of a specialized repertoire of mRNAs and, together with other initiation factors, stimulates binding of mRNA and methionyl-tRNAi to the 40S ribosome. The eIF-3 complex specifically targets and initiates translation of a subset of mRNAs involved in cell proliferation	NA	GO:0003674,GO:0003676,GO:0003723,GO:0003743,GO:0005488,GO:0005575,GO:0005622,GO:0005623,GO:0005737,GO:0005852,GO:0006412,GO:0006413,GO:0006518,GO:0006807,GO:0008135,GO:0008150,GO:0008152,GO:0009058,GO:0009059,GO:0009987,GO:0010467,GO:0019538,GO:0032991,GO:0034641,GO:0034645,GO:0043043,GO:0043170,GO:0043603,GO:0043604,GO:0044237,GO:0044238,GO:0044249,GO:0044260,GO:0044267,GO:0044271,GO:0044424,GO:…	ko:K15029	NA	Paf67	OTHER
127742	By MS/MS	By MS/MS	By MS/MS	By MS/MS	By MS/MS	By MS/MS	By MS/MS	By MS/MS	By MS/MS	By MS/MS	By MS/MS	By MS/MS	220460000	241170000	367630000	265580000	468210000	382040000	475720000	527640000	237170000	289900000	287410000	327600000	198970000	186480000	178010000	147040000	187930000	220920000	210210000	191720000	159420000	172700000	117820000	148150000	82508.K1VJG4	0	1071	COG0685@1|root,KOG0564@2759|Eukaryota,38D0F@33154|Opisthokonta,3NWPE@4751|Fungi,3UZ6Y@5204|Basidiomycota,3VEPH@5234|Tremellales	4751|Fungi	E	Methylenetetrahydrofolate reductase	MET13	GO:0000096,GO:0000097,GO:0003674,GO:0003824,GO:0004489,GO:0005575,GO:0005622,GO:0005623,GO:0005737,GO:0005739,GO:0005829,GO:0006082,GO:0006520,GO:0006555,GO:0006730,GO:0006790,GO:0006807,GO:0008150,GO:0008152,GO:0008652,GO:0009058,GO:0009066,GO:0009067,GO:0009086,GO:0009987,GO:0016053,GO:0016491,GO:0016645,GO:0016646,GO:0019752,GO:0043226,GO:0043227,GO:0043229,GO:0043231,GO:0043436,GO:0044237,GO:…	ko:K00297	ko00670,ko00720,ko01100,ko01120,ko01200,ko01523,map00670,map00720,map01100,map01120,map01200,map01523	MTHFR	OTHER
128636	By matching	By matching	By matching	By MS/MS	By matching	By MS/MS	By MS/MS	By MS/MS	By matching	By matching	By matching	By matching	115920000	111880000	145790000	88471000	156120000	72936000	157970000	211190000	29146000	113320000	34647000	122200000	0	0	0	75789000	0	0	84114000	94531000	0	0	0	0	552467.XP_003194163.1	3.4e-123	363	COG0084@1|root,KOG3020@2759|Eukaryota,38FZ5@33154|Opisthokonta,3NVMD@4751|Fungi,3UZPJ@5204|Basidiomycota,3VF1N@5234|Tremellales	4751|Fungi	L	TatD related DNase	pi038	GO:0000737,GO:0003674,GO:0003824,GO:0004518,GO:0004519,GO:0004527,GO:0004529,GO:0004536,GO:0005575,GO:0005622,GO:0005623,GO:0005737,GO:0006139,GO:0006259,GO:0006308,GO:0006309,GO:0006725,GO:0006807,GO:0006915,GO:0006921,GO:0006950,GO:0006979,GO:0008150,GO:0008152,GO:0008219,GO:0008296,GO:0008408,GO:0009056,GO:0009057,GO:0009987,GO:0012501,GO:0016043,GO:0016787,GO:0016788,GO:0016796,GO:0016895,GO:…	ko:K03424	NA	TatD_DNase	OTHER
129235	By MS/MS	By MS/MS	By MS/MS	By MS/MS	By MS/MS	By MS/MS	By MS/MS	By MS/MS	By MS/MS	By MS/MS	By MS/MS	By MS/MS	105480000	106990000	152500000	111220000	332270000	285360000	267590000	357340000	111560000	128520000	134210000	123270000	68887000	69224000	79063000	74013000	85132000	75666000	82835000	83627000	67005000	61843000	65967000	57624000	5217.XP_007000898.1	3.03e-76	242	KOG4142@1|root,KOG4142@2759|Eukaryota,39SFQ@33154|Opisthokonta,3NVA9@4751|Fungi,3V0HA@5204|Basidiomycota,3VGPV@5234|Tremellales	4751|Fungi	I	Catalyzes the second two steps of the methylation pathway of phosphatidylcholine biosynthesis, the SAM-dependent methylation of phosphatidylmonomethylethanolamine (PMME) to phosphatidyldimethylethanolamine (PDME) and of PDME to phosphatidylcholine (PC)	OPI3	GO:0000003,GO:0000773,GO:0000909,GO:0003006,GO:0003674,GO:0003824,GO:0005575,GO:0005622,GO:0005623,GO:0005737,GO:0005739,GO:0005783,GO:0006629,GO:0006644,GO:0006650,GO:0006656,GO:0006793,GO:0006796,GO:0006807,GO:0007275,GO:0008150,GO:0008152,GO:0008168,GO:0008170,GO:0008610,GO:0008654,GO:0008757,GO:0009058,GO:0009987,GO:0012505,GO:0016020,GO:0016021,GO:0016740,GO:0016741,GO:0019637,GO:0019953,GO:…	ko:K00551	ko00564,ko01100,ko01110,map00564,map01100,map01110	PEMT	OTHER
130327	By MS/MS	By MS/MS	By MS/MS	By MS/MS	By MS/MS	By MS/MS	By MS/MS	By MS/MS	By MS/MS	By MS/MS	By MS/MS	By MS/MS	178460000	231690000	410850000	360000000	491620000	278780000	354200000	505150000	322700000	309430000	388100000	355400000	70136000	81551000	79509000	99466000	69325000	43005000	58606000	67477000	84942000	77429000	74368000	66814000	82508.K1V9X1	8.91e-298	860	KOG3743@1|root,KOG3743@2759|Eukaryota,38B47@33154|Opisthokonta,3NYMC@4751|Fungi,3UZV5@5204|Basidiomycota,3VEN6@5234|Tremellales	4751|Fungi	K	LAG1, DNA binding	NA	GO:0000228,GO:0000785,GO:0000790,GO:0000976,GO:0000977,GO:0000978,GO:0000981,GO:0000982,GO:0000987,GO:0001012,GO:0001067,GO:0001077,GO:0001228,GO:0003674,GO:0003676,GO:0003677,GO:0003690,GO:0003700,GO:0005488,GO:0005575,GO:0005622,GO:0005623,GO:0005634,GO:0005694,GO:0006139,GO:0006351,GO:0006355,GO:0006357,GO:0006366,GO:0006725,GO:0006807,GO:0008150,GO:0008152,GO:0009058,GO:0009059,GO:0009889,GO:…	ko:K06053	ko04330,ko04658,ko05165,ko05169,ko05203,map04330,map04658,map05165,map05169,map05203	BTD,LAG1-DNAbind,TIG	OTHER
130639	By MS/MS	By MS/MS	By MS/MS	By MS/MS	By MS/MS	By MS/MS	By MS/MS	By MS/MS	By MS/MS	By MS/MS	By MS/MS	By MS/MS	381600000	322700000	398480000	236570000	238410000	270240000	266930000	310270000	115940000	117710000	258930000	133690000	114920000	137440000	135260000	141690000	59105000	68895000	70965000	61000000	53596000	50716000	68022000	56654000	5207.AAW43645	4.96e-159	462	COG3173@1|root,2QQPX@2759|Eukaryota,38HGK@33154|Opisthokonta,3NUMB@4751|Fungi,3UY8C@5204|Basidiomycota,3VGRY@5234|Tremellales	4751|Fungi	S	Ecdysteroid kinase	NA	NA	NA	NA	APH	OTHER
130752	By matching	By matching	By matching	By MS/MS	By MS/MS	By MS/MS	By MS/MS	By MS/MS	By matching	By matching	By matching	NA	17914000	14729000	112950000	8471400	52143000	39282000	83986000	47022000	9924100	15510000	7579400	0	0	0	0	0	19988000	26529000	20910000	21470000	0	0	0	0	160860.XP_007345800.1	1.38e-24	112	COG0451@1|root,KOG1502@2759|Eukaryota,38GV9@33154|Opisthokonta,3NVWR@4751|Fungi,3UZAI@5204|Basidiomycota,226YI@155619|Agaricomycetes,3H3XC@355688|Agaricomycetes incertae sedis	4751|Fungi	V	NAD-P-binding protein	NA	NA	NA	NA	Epimerase	OTHER
131000	By MS/MS	By MS/MS	By MS/MS	By MS/MS	By MS/MS	By MS/MS	By MS/MS	By MS/MS	By MS/MS	By MS/MS	By MS/MS	By MS/MS	23241000000	23806000000	26179000000	23938000000	59860000000	58829000000	48718000000	69799000000	23028000000	26687000000	26551000000	24753000000	3458300000	3389100000	3074700000	3386800000	5808400000	6743200000	5861100000	6155200000	3014500000	3209400000	3002300000	2931700000	82508.K1WFZ6	0	1995	COG0045@1|root,KOG1254@2759|Eukaryota,38CW6@33154|Opisthokonta,3NU5J@4751|Fungi,3UYZC@5204|Basidiomycota,3VED0@5234|Tremellales	4751|Fungi	C	ATP citrate lyase citrate-binding	acl1	GO:0003674,GO:0003824,GO:0003878,GO:0005575,GO:0005622,GO:0005623,GO:0005737,GO:0005829,GO:0006082,GO:0006084,GO:0006085,GO:0006091,GO:0006101,GO:0006139,GO:0006163,GO:0006164,GO:0006629,GO:0006631,GO:0006633,GO:0006637,GO:0006725,GO:0006732,GO:0006753,GO:0006790,GO:0006793,GO:0006796,GO:0006807,GO:0008150,GO:0008152,GO:0008610,GO:0009058,GO:0009108,GO:0009117,GO:0009150,GO:0009152,GO:0009165,GO:…	ko:K01648	ko00020,ko00720,ko01100,ko01110,ko01120,ko01130,map00020,map00720,map01100,map01110,map01120,map01130	ATP-grasp_2,Citrate_bind,Citrate_synt,CoA_binding,Ligase_CoA	OTHER
134228	NA	NA	NA	NA	NA	NA	NA	NA	By MS/MS	By MS/MS	By MS/MS	By MS/MS	0	0	0	0	0	0	0	0	51366000	80869000	59442000	55994000	0	0	0	0	0	0	0	0	0	0	0	0	NA	NA	NA	NA	NA	NA	NA	NA	NA	NA	NA	NA	OTHER
134880	By matching	By MS/MS	By matching	By matching	By matching	By MS/MS	By MS/MS	By matching	By MS/MS	By MS/MS	By MS/MS	By matching	47263000	37295000	33615000	14029000	34736000	28667000	65803000	39287000	80013000	83441000	89756000	30610000	0	0	0	0	0	0	30960000	0	23769000	30893000	25988000	0	82508.K1W575	4.56999999999798e-312	895	28NRZ@1|root,2QVC1@2759|Eukaryota,39VAE@33154|Opisthokonta,3NX03@4751|Fungi,3V0T7@5204|Basidiomycota,3VCNP@5234|Tremellales	4751|Fungi	K	Fungal specific transcription factor domain	NA	NA	NA	NA	Fungal_trans,Zn_clus	OTHER
135020	By MS/MS	By MS/MS	By MS/MS	By MS/MS	By MS/MS	By MS/MS	By MS/MS	By MS/MS	By MS/MS	By MS/MS	By MS/MS	By MS/MS	69413000	101930000	107530000	70432000	42378000	96695000	77517000	74259000	86056000	94231000	156270000	157850000	50179000	66085000	47180000	40544000	0	39804000	30715000	37395000	44028000	53330000	62232000	56101000	NA	NA	NA	NA	NA	NA	NA	NA	NA	NA	NA	NA	OTHER
137215	By MS/MS	By MS/MS	By MS/MS	By MS/MS	By MS/MS	By MS/MS	By MS/MS	By MS/MS	By MS/MS	By MS/MS	By MS/MS	By MS/MS	587410000	514370000	519800000	551490000	536210000	574560000	902850000	1537000000	627780000	696910000	718470000	703490000	239820000	255510000	227980000	244730000	184940000	222410000	208440000	212850000	264330000	307260000	240990000	246120000	82508.K1VJM2	0	1107	COG0532@1|root,KOG1144@2759|Eukaryota,38DE9@33154|Opisthokonta,3NX6J@4751|Fungi,3UYBW@5204|Basidiomycota,3VDW1@5234|Tremellales	4751|Fungi	J	Translation-initiation factor 2	FUN12	GO:0000166,GO:0000462,GO:0001732,GO:0001882,GO:0001883,GO:0002181,GO:0002183,GO:0003674,GO:0003676,GO:0003723,GO:0003743,GO:0003824,GO:0003924,GO:0005488,GO:0005515,GO:0005525,GO:0005575,GO:0005622,GO:0005623,GO:0005737,GO:0005739,GO:0005829,GO:0005840,GO:0006139,GO:0006364,GO:0006396,GO:0006412,GO:0006413,GO:0006417,GO:0006446,GO:0006518,GO:0006725,GO:0006807,GO:0006996,GO:0008135,GO:0008150,GO:…	ko:K03243	ko03013,map03013	GTP_EFTU,GTP_EFTU_D2,IF-2	OTHER
139082	By MS/MS	By MS/MS	By MS/MS	By MS/MS	By MS/MS	By MS/MS	By MS/MS	By MS/MS	By MS/MS	By MS/MS	By MS/MS	By MS/MS	930990000	748900000	1200700000	1089700000	1175700000	844490000	1122200000	1273500000	942300000	935260000	1227700000	1145900000	194580000	182960000	209830000	211510000	170890000	135220000	164530000	141510000	173420000	175600000	178470000	203760000	82508.K1W5F5	0	2498	COG0086@1|root,KOG0260@2759|Eukaryota,38CEW@33154|Opisthokonta,3NWQ7@4751|Fungi,3UYEK@5204|Basidiomycota,3VDRG@5234|Tremellales	4751|Fungi	K	DNA-dependent RNA polymerase catalyzes the transcription of DNA into RNA using the four ribonucleoside triphosphates as substrates	RPO21	GO:0000228,GO:0000428,GO:0000731,GO:0000785,GO:0000790,GO:0003674,GO:0003676,GO:0003677,GO:0005488,GO:0005575,GO:0005622,GO:0005623,GO:0005634,GO:0005654,GO:0005665,GO:0005694,GO:0005737,GO:0005739,GO:0006139,GO:0006259,GO:0006281,GO:0006301,GO:0006351,GO:0006366,GO:0006725,GO:0006807,GO:0006950,GO:0006974,GO:0008150,GO:0008152,GO:0009058,GO:0009059,GO:0009987,GO:0010467,GO:0010494,GO:0016070,GO:…	ko:K03006	ko00230,ko00240,ko01100,ko03020,ko05016,ko05168,ko05169,map00230,map00240,map01100,map03020,map05016,map05168,map05169	RNA_pol_Rpb1_1,RNA_pol_Rpb1_2,RNA_pol_Rpb1_3,RNA_pol_Rpb1_4,RNA_pol_Rpb1_5,RNA_pol_Rpb1_6,RNA_pol_Rpb1_7,RNA_pol_Rpb1_R	OTHER
139103	By matching	By matching	By MS/MS	By MS/MS	By MS/MS	By MS/MS	By MS/MS	By MS/MS	By MS/MS	By MS/MS	By MS/MS	By MS/MS	19280000	10569000	45033000	19772000	80070000	84366000	92310000	64458000	35036000	43995000	69360000	40230000	0	0	34896000	0	32237000	46931000	46105000	33223000	0	0	39624000	0	82508.K1W6S4	2.86e-95	309	COG2453@1|root,KOG1716@2759|Eukaryota,38DF8@33154|Opisthokonta,3NVXN@4751|Fungi,3UZUR@5204|Basidiomycota,3VE3U@5234|Tremellales	4751|Fungi	V	Dual specificity phosphatase, catalytic domain	YVH1	GO:0000003,GO:0000027,GO:0003006,GO:0003674,GO:0003824,GO:0004721,GO:0004725,GO:0005575,GO:0005622,GO:0005623,GO:0005634,GO:0005737,GO:0006464,GO:0006470,GO:0006793,GO:0006796,GO:0006807,GO:0006996,GO:0007049,GO:0007154,GO:0007165,GO:0008138,GO:0008150,GO:0008152,GO:0009272,GO:0009653,GO:0009893,GO:0009894,GO:0009896,GO:0009987,GO:0010494,GO:0010506,GO:0010508,GO:0010638,GO:0010927,GO:0016043,GO:…	ko:K14819	NA	DSPc	OTHER
139383	By MS/MS	By MS/MS	By MS/MS	By MS/MS	By MS/MS	By MS/MS	By MS/MS	By MS/MS	By MS/MS	By MS/MS	By MS/MS	By MS/MS	2382100000	2162400000	2403000000	1880900000	5968500000	4861500000	5433300000	6017500000	2650200000	3092400000	2993000000	2736300000	458660000	417810000	481190000	446710000	759020000	714250000	672690000	619390000	469350000	490840000	452240000	469370000	82508.K1W6R4	3.17e-108	329	COG0197@1|root,KOG2160@2759|Eukaryota,3A238@33154|Opisthokonta,3P2S3@4751|Fungi,3V13I@5204|Basidiomycota,3VF3J@5234|Tremellales	4751|Fungi	J	Nucleotide exchange factor Fes1	FES1	GO:0000166,GO:0000774,GO:0002181,GO:0003674,GO:0005488,GO:0005575,GO:0005622,GO:0005623,GO:0005737,GO:0005829,GO:0005840,GO:0006412,GO:0006508,GO:0006511,GO:0006515,GO:0006518,GO:0006807,GO:0006950,GO:0008150,GO:0008152,GO:0009056,GO:0009057,GO:0009058,GO:0009059,GO:0009987,GO:0010033,GO:0010467,GO:0010498,GO:0017076,GO:0019538,GO:0019941,GO:0022626,GO:0030163,GO:0030234,GO:0030554,GO:0032991,GO:…	NA	NA	Fes1,HEAT_2,HEAT_EZ	OTHER
139620	By matching	By matching	By MS/MS	By MS/MS	By MS/MS	By MS/MS	By MS/MS	By MS/MS	By MS/MS	By MS/MS	By MS/MS	By MS/MS	223420000	157660000	198390000	30658000	170010000	186920000	202090000	177340000	206420000	215390000	242900000	229300000	146040000	0	0	0	0	98152000	0	0	134260000	126040000	122690000	134730000	82508.K1WXY6	1.93e-156	446	KOG1682@1|root,KOG1682@2759|Eukaryota,39M8G@33154|Opisthokonta,3P1BI@4751|Fungi	4751|Fungi	I	Belongs to the enoyl-CoA hydratase isomerase family	NA	NA	NA	NA	ECH_1	OTHER
140772	By matching	By MS/MS	By MS/MS	By MS/MS	By MS/MS	By MS/MS	By MS/MS	By MS/MS	NA	By matching	By matching	NA	20186000	17756000	20459000	21091000	32403000	23045000	27000000	28972000	0	14365000	14493000	0	0	0	0	0	0	0	0	0	0	0	0	0	5207.AAW42966	6.83e-125	362	COG1028@1|root,KOG0725@2759|Eukaryota,38E1P@33154|Opisthokonta,3NYJU@4751|Fungi,3V06Q@5204|Basidiomycota,3VCQB@5234|Tremellales	4751|Fungi	Q	Enoyl-(Acyl carrier protein) reductase	NA	NA	NA	NA	adh_short,adh_short_C2	OTHER
142411	By matching	NA	NA	NA	By MS/MS	By matching	By matching	By matching	NA	By MS/MS	NA	By matching	25334000	0	0	0	37410000	18318000	22697000	23470000	0	17693000	0	20219000	0	0	0	0	0	0	0	0	0	0	0	0	82508.K1W8Y1	0	1359	KOG1953@1|root,KOG1953@2759|Eukaryota,38DAT@33154|Opisthokonta,3NUM4@4751|Fungi,3UZRB@5204|Basidiomycota,3VDAB@5234|Tremellales	4751|Fungi	U	Transport protein Trs120 or TRAPPC9, TRAPP II complex subunit	TRS120	GO:0000278,GO:0000281,GO:0000910,GO:0005575,GO:0005622,GO:0005623,GO:0005737,GO:0005768,GO:0005769,GO:0005794,GO:0005801,GO:0005802,GO:0005886,GO:0006810,GO:0006886,GO:0006891,GO:0006892,GO:0006893,GO:0007049,GO:0007107,GO:0008104,GO:0008150,GO:0009987,GO:0012505,GO:0015031,GO:0015833,GO:0016020,GO:0016043,GO:0016192,GO:0016197,GO:0016482,GO:0022402,GO:0030008,GO:0030427,GO:0031410,GO:0031982,GO:…	ko:K20306	NA	TRAPPC9-Trs120	OTHER
143427	By MS/MS	By MS/MS	By MS/MS	By MS/MS	By MS/MS	By MS/MS	By MS/MS	By MS/MS	By MS/MS	By MS/MS	By MS/MS	By MS/MS	137300000	90861000	245220000	135330000	123740000	94550000	171650000	125000000	165690000	187430000	211650000	88242000	41708000	23787000	123020000	113410000	52597000	11849000	65231000	46083000	139900000	124950000	134790000	182460000	552467.XP_003192418.1	1.34e-152	446	KOG2785@1|root,KOG2785@2759|Eukaryota,38CWN@33154|Opisthokonta,3NX8I@4751|Fungi,3UZ9T@5204|Basidiomycota,3VE6E@5234|Tremellales	4751|Fungi	S	C2H2 type zinc-finger (2 copies)	REI1	GO:0000003,GO:0000278,GO:0003674,GO:0003676,GO:0003677,GO:0005488,GO:0005575,GO:0005622,GO:0005623,GO:0005737,GO:0005829,GO:0005840,GO:0006810,GO:0006913,GO:0007049,GO:0007114,GO:0007117,GO:0008150,GO:0009987,GO:0015934,GO:0019954,GO:0022414,GO:0022613,GO:0022625,GO:0022626,GO:0030684,GO:0030687,GO:0032505,GO:0032991,GO:0040007,GO:0042254,GO:0042273,GO:0043226,GO:0043228,GO:0043229,GO:0043232,GO:…	ko:K14816	NA	zf-C2H2_2,zf-C2H2_jaz,zf-met	OTHER
144271	By MS/MS	By MS/MS	By MS/MS	By MS/MS	By MS/MS	By MS/MS	By MS/MS	By MS/MS	By MS/MS	By MS/MS	By MS/MS	By MS/MS	7389600000	6095700000	9612000000	7307600000	10964000000	9106900000	14956000000	12299000000	7228900000	8217900000	8733000000	7444400000	2441300000	1906000000	3098300000	2406600000	2485000000	2114000000	3324500000	2589400000	2114700000	2304100000	2232400000	2342400000	82508.K1VNK8	2.14e-24	98.6	2FHVK@1|root,2TJ9A@2759|Eukaryota,3AXXF@33154|Opisthokonta,3PJ2N@4751|Fungi,3V8BW@5204|Basidiomycota,3VHBV@5234|Tremellales	4751|Fungi	-	-	NA	NA	NA	NA	-	OTHER
145015	By MS/MS	By matching	By MS/MS	By MS/MS	By MS/MS	By MS/MS	By MS/MS	By MS/MS	By MS/MS	By matching	By MS/MS	By MS/MS	22012000	26945000	31056000	23461000	34632000	24649000	41952000	32347000	19272000	28111000	33415000	24331000	0	0	0	0	0	0	0	0	0	0	0	0	82508.K1VF31	6.15e-162	488	KOG4299@1|root,KOG4299@2759|Eukaryota,38CTP@33154|Opisthokonta,3NXE4@4751|Fungi,3V0SN@5204|Basidiomycota,3VD08@5234|Tremellales	4751|Fungi	C	PHD-finger	NA	GO:0000118,GO:0000122,GO:0000228,GO:0000785,GO:0000790,GO:0000976,GO:0000977,GO:0001012,GO:0001067,GO:0003674,GO:0003676,GO:0003677,GO:0003682,GO:0003690,GO:0003712,GO:0003824,GO:0005488,GO:0005515,GO:0005575,GO:0005622,GO:0005623,GO:0005634,GO:0005654,GO:0005694,GO:0006139,GO:0006275,GO:0006325,GO:0006338,GO:0006342,GO:0006351,GO:0006354,GO:0006355,GO:0006357,GO:0006366,GO:0006368,GO:0006464,GO:…	NA	NA	PHD	OTHER
146549	NA	NA	By matching	NA	By MS/MS	By MS/MS	By MS/MS	By MS/MS	NA	By matching	NA	By matching	0	0	18277000	0	86318000	65109000	87868000	98701000	0	10923000	0	27492000	0	0	0	0	0	0	0	0	0	0	0	0	5217.XP_007002023.1	2.42e-159	449	COG2007@1|root,KOG3163@2759|Eukaryota,38B3Y@33154|Opisthokonta,3NYAP@4751|Fungi,3UYRN@5204|Basidiomycota,3VGAB@5234|Tremellales	4751|Fungi	J	Ribosomal protein S8e	NSA2	GO:0000460,GO:0000463,GO:0000466,GO:0000470,GO:0005575,GO:0005622,GO:0005623,GO:0005634,GO:0005730,GO:0006139,GO:0006364,GO:0006396,GO:0006725,GO:0006807,GO:0008150,GO:0008152,GO:0009987,GO:0010467,GO:0016070,GO:0016072,GO:0022613,GO:0030684,GO:0030687,GO:0031974,GO:0031981,GO:0032991,GO:0034470,GO:0034641,GO:0034660,GO:0042254,GO:0042273,GO:0043170,GO:0043226,GO:0043227,GO:0043228,GO:0043229,GO:…	ko:K14842	NA	Ribosomal_S8e	OTHER
147361	By MS/MS	By MS/MS	NA	NA	By matching	NA	By matching	By matching	By MS/MS	By matching	By matching	By matching	22725000	18795000	0	0	24249000	0	16307000	17685000	17750000	27701000	21758000	19398000	0	0	0	0	0	0	0	0	0	0	0	0	5217.XP_007002639.1	1.99e-23	101	2DZWC@1|root,2S7CU@2759|Eukaryota,3AWMT@33154|Opisthokonta,3P6WZ@4751|Fungi,3V281@5204|Basidiomycota,3VH9N@5234|Tremellales	4751|Fungi	S	DNA-directed RNA polymerase III subunit Rpc31	NA	NA	ko:K03024	ko00230,ko00240,ko01100,ko03020,ko04623,ko05169,map00230,map00240,map01100,map03020,map04623,map05169	RNA_pol_3_Rpc31	OTHER
147741	By MS/MS	By MS/MS	By MS/MS	By MS/MS	By MS/MS	By MS/MS	By MS/MS	By MS/MS	By MS/MS	By MS/MS	By MS/MS	By MS/MS	208960000	189690000	170360000	252520000	280140000	232450000	328780000	365980000	276780000	268440000	280010000	215160000	66839000	91440000	75407000	69973000	91881000	64173000	88613000	77990000	88381000	81806000	63568000	81255000	82508.K1VB04	7.25e-152	445	2E8AD@1|root,2SETC@2759|Eukaryota,3ADMR@33154|Opisthokonta,3P9V0@4751|Fungi,3V2WA@5204|Basidiomycota,3VE6M@5234|Tremellales	4751|Fungi	-	-	NA	NA	NA	NA	-	OTHER
148526	By MS/MS	By matching	By matching	By matching	By matching	By matching	By matching	By matching	By matching	By matching	By matching	By MS/MS	28161000	29629000	32229000	26880000	19834000	11646000	23648000	22463000	36885000	36508000	24434000	32578000	0	0	0	0	0	0	0	0	0	0	0	0	NA	NA	NA	NA	NA	NA	NA	NA	NA	NA	NA	NA	OTHER
149213	By MS/MS	By matching	By matching	By MS/MS	By matching	By MS/MS	By matching	By MS/MS	By MS/MS	By MS/MS	By MS/MS	By matching	129990000	133400000	86885000	125710000	163380000	87626000	126530000	186290000	92231000	160310000	149990000	126740000	0	0	0	0	0	0	0	0	0	0	0	0	5207.AAW42703	1.37e-96	287	COG0125@1|root,KOG3327@2759|Eukaryota,39U2H@33154|Opisthokonta,3P2YY@4751|Fungi,3V0X5@5204|Basidiomycota,3VESA@5234|Tremellales	4751|Fungi	F	Thymidylate kinase	CDC8	GO:0003674,GO:0003824,GO:0004550,GO:0004798,GO:0005575,GO:0005622,GO:0005623,GO:0005634,GO:0005737,GO:0006139,GO:0006165,GO:0006220,GO:0006221,GO:0006227,GO:0006233,GO:0006235,GO:0006725,GO:0006753,GO:0006793,GO:0006796,GO:0006807,GO:0008150,GO:0008152,GO:0009041,GO:0009058,GO:0009117,GO:0009123,GO:0009132,GO:0009133,GO:0009138,GO:0009139,GO:0009141,GO:0009142,GO:0009147,GO:0009148,GO:0009165,GO:…	ko:K00943	ko00240,ko01100,map00240,map01100	Thymidylate_kin	OTHER
150022	By MS/MS	By MS/MS	By MS/MS	By MS/MS	By MS/MS	By MS/MS	By MS/MS	By MS/MS	By MS/MS	By MS/MS	By MS/MS	By MS/MS	956540000	858850000	1140200000	631700000	1879400000	1236700000	1844000000	2182000000	1037700000	1163300000	1010600000	1197000000	541820000	444310000	524690000	538620000	692490000	463240000	644280000	622900000	551220000	541760000	539450000	519730000	82508.K1V2Z7	9.81e-225	623	KOG1164@1|root,KOG1164@2759|Eukaryota,38BQ1@33154|Opisthokonta,3NUPD@4751|Fungi,3UYWD@5204|Basidiomycota,3VE8B@5234|Tremellales	4751|Fungi	T	Protein tyrosine kinase	HRR25	GO:0000003,GO:0000045,GO:0000280,GO:0000407,GO:0000775,GO:0000776,GO:0000777,GO:0000779,GO:0000793,GO:0002097,GO:0002098,GO:0003674,GO:0003824,GO:0004672,GO:0004674,GO:0004713,GO:0005575,GO:0005622,GO:0005623,GO:0005634,GO:0005694,GO:0005737,GO:0005794,GO:0005815,GO:0005816,GO:0005829,GO:0005856,GO:0005886,GO:0005933,GO:0005934,GO:0005935,GO:0006139,GO:0006259,GO:0006281,GO:0006396,GO:0006399,GO:…	ko:K14758	ko03008,map03008	Pkinase	OTHER
150117	By matching	By matching	By MS/MS	By matching	By MS/MS	By MS/MS	By MS/MS	By MS/MS	By matching	NA	By matching	By matching	31425000	37328000	33327000	33948000	45715000	68049000	75563000	70643000	22894000	0	39888000	52015000	0	0	0	0	0	35206000	34780000	30209000	0	0	0	0	82508.K1V3C3	9.13e-88	283	KOG3100@1|root,KOG3100@2759|Eukaryota,38EI3@33154|Opisthokonta,3P2SY@4751|Fungi,3V2IS@5204|Basidiomycota,3VGAZ@5234|Tremellales	4751|Fungi	S	Fcf2 pre-rRNA processing	fcf2	GO:0000447,GO:0000460,GO:0000462,GO:0000466,GO:0000469,GO:0000472,GO:0000478,GO:0000479,GO:0000480,GO:0000966,GO:0000967,GO:0005575,GO:0005622,GO:0005623,GO:0005634,GO:0005730,GO:0006139,GO:0006364,GO:0006396,GO:0006725,GO:0006807,GO:0008150,GO:0008152,GO:0009987,GO:0010467,GO:0016070,GO:0016072,GO:0022613,GO:0030490,GO:0031974,GO:0031981,GO:0034470,GO:0034471,GO:0034641,GO:0034660,GO:0042254,GO:…	NA	NA	Fcf2	OTHER
150598	By MS/MS	By MS/MS	By MS/MS	By MS/MS	By MS/MS	By MS/MS	By MS/MS	By MS/MS	By MS/MS	By MS/MS	By MS/MS	By MS/MS	125760000	84547000	142180000	110230000	37761000	19665000	40607000	43032000	107870000	127420000	128840000	73544000	40158000	34993000	47882000	55774000	77788000	65738000	117020000	91463000	59385000	58032000	53907000	66510000	82508.K1VMT3	1.62e-247	745	KOG0583@1|root,KOG0583@2759|Eukaryota,38GQS@33154|Opisthokonta,3NUBG@4751|Fungi,3UZ6J@5204|Basidiomycota	4751|Fungi	T	Kinase-like	NA	GO:0000166,GO:0003674,GO:0003824,GO:0004672,GO:0004674,GO:0005488,GO:0005524,GO:0005575,GO:0005622,GO:0005623,GO:0005634,GO:0005737,GO:0006464,GO:0006468,GO:0006793,GO:0006796,GO:0006807,GO:0007154,GO:0007165,GO:0008144,GO:0008150,GO:0008152,GO:0009987,GO:0016301,GO:0016310,GO:0016740,GO:0016772,GO:0016773,GO:0017076,GO:0019538,GO:0023052,GO:0030554,GO:0032553,GO:0032555,GO:0032559,GO:0032878,GO:…	NA	NA	Pkinase	OTHER
152075	By MS/MS	By MS/MS	By MS/MS	By MS/MS	By MS/MS	By MS/MS	By MS/MS	By MS/MS	By MS/MS	By MS/MS	By MS/MS	By MS/MS	6666900000	5462400000	5136200000	4095400000	10391000000	11048000000	9873300000	11347000000	6826800000	5418800000	7813700000	8164800000	4409800000	3833700000	3160200000	2787600000	2701900000	3790800000	2752000000	3717100000	3344000000	3198700000	4202200000	4909500000	82508.K1VEW5	3.13e-166	469	COG0052@1|root,KOG0830@2759|Eukaryota,38E10@33154|Opisthokonta,3NUJI@4751|Fungi,3UZNG@5204|Basidiomycota,3VEJJ@5234|Tremellales	4751|Fungi	J	Required for the assembly and or stability of the 40S ribosomal subunit. Required for the processing of the 20S rRNA- precursor to mature 18S rRNA in a late step of the maturation of 40S ribosomal subunits	RPS0	GO:0000028,GO:0000447,GO:0000460,GO:0000461,GO:0000462,GO:0000466,GO:0000469,GO:0000478,GO:0000479,GO:0002181,GO:0003674,GO:0003735,GO:0005198,GO:0005575,GO:0005622,GO:0005623,GO:0005737,GO:0005829,GO:0005840,GO:0006139,GO:0006364,GO:0006396,GO:0006403,GO:0006405,GO:0006407,GO:0006412,GO:0006518,GO:0006611,GO:0006725,GO:0006807,GO:0006810,GO:0006886,GO:0006913,GO:0006996,GO:0008104,GO:0008150,GO:…	ko:K02998	ko03010,map03010	40S_SA_C,Ribosomal_S2	OTHER
152554	By MS/MS	By MS/MS	By MS/MS	By MS/MS	By MS/MS	By MS/MS	By MS/MS	By MS/MS	By MS/MS	By MS/MS	By MS/MS	By MS/MS	81327000	145570000	151180000	117590000	801110000	712540000	841430000	881670000	138070000	141860000	143080000	170210000	39471000	40111000	68297000	74807000	133770000	142330000	140710000	158760000	69910000	50245000	47652000	61731000	1449058.JQKT01000007_gene1122	3.11e-288	800	COG0111@1|root,COG0111@2|Bacteria,2GJGA@201174|Actinobacteria,4FMFN@85023|Microbacteriaceae	201174|Actinobacteria	EH	D-isomer specific 2-hydroxyacid dehydrogenase, catalytic domain	serA	NA	ko:K00058	ko00260,ko00680,ko01100,ko01120,ko01130,ko01200,ko01230,map00260,map00680,map01100,map01120,map01130,map01200,map01230	2-Hacid_dh,2-Hacid_dh_C,ACT	OTHER
152859	By MS/MS	By MS/MS	By MS/MS	By MS/MS	By MS/MS	By MS/MS	By MS/MS	By MS/MS	By matching	By matching	By matching	By matching	170040000	235280000	187300000	208740000	410110000	350020000	273980000	302730000	87701000	87512000	51636000	82210000	66071000	74719000	50751000	51129000	109560000	107060000	89963000	76613000	24059000	28829000	29706000	20959000	405948.SACE_6523	2.19e-159	464	COG1304@1|root,COG1304@2|Bacteria,2GJA5@201174|Actinobacteria,4DYM9@85010|Pseudonocardiales	201174|Actinobacteria	C	Alpha-hydroxyacid dehydrogenase, FMN-dependent L-lactate dehydrogenase	NA	NA	ko:K00101,ko:K00467	ko00620,ko01100,map00620,map01100	FMN_dh	OTHER
153424	By MS/MS	By MS/MS	By MS/MS	By MS/MS	By MS/MS	By MS/MS	By MS/MS	By MS/MS	By MS/MS	By MS/MS	By MS/MS	By MS/MS	12751000000	11970000000	15929000000	12572000000	31030000000	25826000000	29759000000	34764000000	12457000000	12478000000	14272000000	12679000000	1374800000	1271100000	1310200000	1315500000	2186100000	2232500000	2232300000	2235500000	1224900000	1174600000	1104300000	1134600000	82508.K1VHK5	2.17e-269	749	COG0364@1|root,KOG0563@2759|Eukaryota,38E2A@33154|Opisthokonta,3NWH9@4751|Fungi,3UYTU@5204|Basidiomycota,3VDV8@5234|Tremellales	4751|Fungi	G	Catalyzes the rate-limiting step of the oxidative pentose-phosphate pathway, which represents a route for the dissimilation of carbohydrates besides glycolysis	ZWF1	GO:0000166,GO:0000302,GO:0002262,GO:0002376,GO:0002520,GO:0003674,GO:0003824,GO:0004345,GO:0005488,GO:0005515,GO:0005536,GO:0005575,GO:0005622,GO:0005623,GO:0005737,GO:0005829,GO:0005886,GO:0005975,GO:0005996,GO:0006066,GO:0006081,GO:0006091,GO:0006098,GO:0006139,GO:0006518,GO:0006575,GO:0006629,GO:0006694,GO:0006695,GO:0006725,GO:0006732,GO:0006733,GO:0006739,GO:0006740,GO:0006749,GO:0006753,GO:…	ko:K00036	ko00030,ko00480,ko01100,ko01110,ko01120,ko01130,ko01200,ko05230,map00030,map00480,map01100,map01110,map01120,map01130,map01200,map05230	G6PD_C,G6PD_N	OTHER
153565	NA	By matching	By matching	By matching	By MS/MS	By MS/MS	NA	By matching	NA	By matching	By matching	NA	0	4973200	6222800	6619400	8501600	4246300	0	4647300	0	6349700	8574200	0	0	0	0	0	0	0	0	0	0	0	0	0	82508.K1VNT8	1.25e-305	869	2CN2X@1|root,2QTM3@2759|Eukaryota,38GHQ@33154|Opisthokonta,3NUP4@4751|Fungi,3UYDB@5204|Basidiomycota,3VEH9@5234|Tremellales	4751|Fungi	S	MYND finger	samB	GO:0000003,GO:0003006,GO:0005575,GO:0005622,GO:0005623,GO:0007049,GO:0007163,GO:0008150,GO:0009653,GO:0009987,GO:0019953,GO:0022402,GO:0022414,GO:0030154,GO:0030435,GO:0032502,GO:0032991,GO:0034293,GO:0043934,GO:0043935,GO:0044424,GO:0044464,GO:0044703,GO:0048646,GO:0048856,GO:0048869,GO:0051321,GO:0051704,GO:1902494,GO:1903046,GO:1990234,GO:1990304	NA	NA	zf-MYND	OTHER
154297	By MS/MS	NA	By MS/MS	By MS/MS	By MS/MS	By matching	By matching	NA	By matching	NA	NA	By matching	44153000	0	82409000	38894000	79908000	30572000	77021000	0	42375000	0	0	38359000	0	0	0	0	0	0	0	0	0	0	0	0	82508.K1VTJ3	6.04e-187	560	2CXX3@1|root,2S0D7@2759|Eukaryota	2759|Eukaryota	K	Fungal specific transcription factor domain	NA	NA	NA	NA	Fungal_trans,Zn_clus	OTHER
155057	By MS/MS	By MS/MS	By MS/MS	By MS/MS	By MS/MS	By MS/MS	By MS/MS	By MS/MS	By MS/MS	By MS/MS	By MS/MS	By MS/MS	188450000	106150000	265710000	271420000	206650000	233610000	184480000	267190000	108240000	204210000	121810000	125080000	67966000	85447000	128570000	122690000	61746000	86848000	57547000	66128000	84633000	63634000	79893000	84121000	NA	NA	NA	NA	NA	NA	NA	NA	NA	NA	NA	NA	OTHER
155065	By MS/MS	By MS/MS	By MS/MS	By MS/MS	By MS/MS	By MS/MS	By MS/MS	By MS/MS	By MS/MS	By MS/MS	By MS/MS	By MS/MS	78216000	112390000	196970000	131650000	152530000	84848000	159660000	180110000	115450000	114360000	158080000	168080000	54943000	66261000	76413000	69888000	42987000	63422000	47877000	57905000	47755000	41943000	53303000	56106000	5207.AAW42342	2.33e-126	373	COG5597@1|root,KOG1950@2759|Eukaryota,39TYB@33154|Opisthokonta,3NVI2@4751|Fungi,3V0DQ@5204|Basidiomycota,3VF7E@5234|Tremellales	4751|Fungi	G	Glycosyl transferase family 8	NA	NA	NA	NA	Glyco_transf_8	OTHER
155185	By matching	By MS/MS	By MS/MS	By matching	NA	By matching	By MS/MS	By matching	By MS/MS	NA	By matching	NA	76457000	116690000	151500000	69165000	0	106540000	91422000	93009000	170940000	0	13440000	0	0	0	0	0	0	0	0	0	0	0	0	0	5217.XP_007004155.1	5.65e-82	259	KOG2435@1|root,KOG2435@2759|Eukaryota,39UTK@33154|Opisthokonta,3P3P4@4751|Fungi,3V25E@5204|Basidiomycota,3VF33@5234|Tremellales	4751|Fungi	S	Complex I intermediate-associated protein 30 (CIA30)	NA	GO:0003674,GO:0005488,GO:0005515,GO:0005575,GO:0005622,GO:0005623,GO:0005737,GO:0005739,GO:0005740,GO:0005743,GO:0005746,GO:0005747,GO:0006091,GO:0006119,GO:0006120,GO:0006139,GO:0006163,GO:0006725,GO:0006753,GO:0006793,GO:0006796,GO:0006807,GO:0008150,GO:0008152,GO:0009117,GO:0009123,GO:0009126,GO:0009141,GO:0009144,GO:0009150,GO:0009161,GO:0009167,GO:0009199,GO:0009205,GO:0009259,GO:0009987,GO:…	ko:K18159	ko04714,map04714	CIA30	OTHER
155635	By MS/MS	By MS/MS	By matching	By matching	By MS/MS	By MS/MS	By MS/MS	By MS/MS	By matching	By matching	By matching	By MS/MS	312490000	297550000	279410000	248310000	1033300000	927340000	1105300000	960100000	174230000	213190000	299780000	468670000	184650000	182200000	164910000	168160000	277840000	767010000	299290000	310730000	125090000	126370000	159330000	207510000	82508.K1VGE5	6.74e-101	301	KOG4186@1|root,KOG4186@2759|Eukaryota,38B7Q@33154|Opisthokonta,3NWIA@4751|Fungi,3V0HY@5204|Basidiomycota,3VF68@5234|Tremellales	4751|Fungi	U	peroxisome organization and biogenesis-related protein	PEX11	GO:0005575,GO:0005622,GO:0005623,GO:0005737,GO:0005777,GO:0005778,GO:0005783,GO:0006082,GO:0006629,GO:0006631,GO:0006996,GO:0007031,GO:0008150,GO:0008152,GO:0009987,GO:0012505,GO:0016020,GO:0016043,GO:0016559,GO:0019395,GO:0019752,GO:0030258,GO:0031090,GO:0031903,GO:0032535,GO:0032787,GO:0032991,GO:0034440,GO:0042579,GO:0043226,GO:0043227,GO:0043229,GO:0043231,GO:0043436,GO:0044237,GO:0044238,GO:…	ko:K13352	ko04146,map04146	PEX11	OTHER
156110	By MS/MS	By MS/MS	By MS/MS	By MS/MS	NA	NA	By matching	NA	By MS/MS	By MS/MS	By MS/MS	By MS/MS	2400000000	2667800000	3113100000	2655200000	0	0	66841000	0	3373600000	3307600000	2646200000	5297500000	816360000	730150000	784390000	829510000	0	0	0	0	813500000	795560000	670140000	1042400000	82508.K1W368	0	886	COG2986@1|root,KOG0222@2759|Eukaryota,39FQ6@33154|Opisthokonta,3NX1Q@4751|Fungi,3UY9H@5204|Basidiomycota	4751|Fungi	Q	Phenylalanine ammonia-lyase	NA	NA	ko:K10775	ko00360,ko00940,ko01100,ko01110,map00360,map00940,map01100,map01110	Lyase_aromatic	OTHER
156408	By MS/MS	By MS/MS	NA	NA	By MS/MS	By matching	By MS/MS	NA	By MS/MS	By matching	By matching	By MS/MS	414540000	379120000	0	0	454700000	373700000	519130000	0	253210000	276380000	346200000	405520000	0	0	0	0	0	0	0	0	0	0	0	0	NA	NA	NA	NA	NA	NA	NA	NA	NA	NA	NA	NA	OTHER
157230	By MS/MS	By matching	By MS/MS	By MS/MS	By MS/MS	By matching	By MS/MS	By matching	By MS/MS	By MS/MS	By MS/MS	By MS/MS	18691000	22401000	38673000	25666000	23136000	18500000	28805000	25314000	46302000	24964000	44973000	26818000	0	0	0	0	0	0	0	0	24718000	0	19486000	0	82508.K1W0L7	6.72e-277	794	COG0513@1|root,KOG0328@2759|Eukaryota,39KYV@33154|Opisthokonta,3Q5CI@4751|Fungi,3V7HD@5204|Basidiomycota	4751|Fungi	A	DEAD/DEAH box helicase	NA	NA	ko:K03257	ko03013,map03013	DEAD,Helicase_C	OTHER
158302	By MS/MS	By MS/MS	By MS/MS	By MS/MS	By MS/MS	By MS/MS	By MS/MS	By MS/MS	By MS/MS	By MS/MS	By MS/MS	By MS/MS	1946300000	2261000000	2001200000	1740300000	5311300000	3621100000	5458700000	5649300000	2103900000	2450000000	2543900000	2193100000	351030000	407120000	383890000	391380000	518140000	506160000	565660000	486370000	354550000	358100000	359200000	374800000	82508.K1VQI4	0	1353	KOG0276@1|root,KOG0276@2759|Eukaryota,38EBC@33154|Opisthokonta,3NWHK@4751|Fungi,3UYE5@5204|Basidiomycota,3VEAC@5234|Tremellales	4751|Fungi	U	The coatomer is a cytosolic protein complex that binds to dilysine motifs and reversibly associates with Golgi non- clathrin-coated vesicles, which further mediate biosynthetic protein transport from the ER, via the Golgi up to the trans Golgi network. Coatomer complex is required for budding from Golgi membranes, and is essential for the retrograde Golgi-to-ER transport of dilysine-tagged protei…	SEC27	GO:0003674,GO:0005488,GO:0005515,GO:0005575,GO:0005622,GO:0005623,GO:0005737,GO:0005794,GO:0005798,GO:0006810,GO:0006886,GO:0006888,GO:0006890,GO:0006891,GO:0007034,GO:0008104,GO:0008150,GO:0012505,GO:0012506,GO:0015031,GO:0015833,GO:0016020,GO:0016192,GO:0016197,GO:0030117,GO:0030120,GO:0030126,GO:0030135,GO:0030137,GO:0030659,GO:0030660,GO:0030662,GO:0030663,GO:0031090,GO:0031410,GO:0031982,GO:…	ko:K17302	NA	Coatomer_WDAD,WD40	OTHER
158739	By MS/MS	By matching	By MS/MS	By MS/MS	By MS/MS	By MS/MS	By MS/MS	By MS/MS	By MS/MS	By MS/MS	By MS/MS	By MS/MS	125880000	93407000	42192000	45452000	243230000	303380000	408100000	365010000	105220000	168210000	163450000	79450000	153780000	0	0	67943000	116550000	117780000	183730000	108710000	0	183190000	70420000	0	82508.K1WPC5	3.92e-135	409	KOG1414@1|root,KOG1414@2759|Eukaryota,39QGM@33154|Opisthokonta,3NVG8@4751|Fungi,3V17G@5204|Basidiomycota,3VE97@5234|Tremellales	4751|Fungi	K	Aft1 HRA domain	SKO1	GO:0000003,GO:0000018,GO:0000122,GO:0000165,GO:0000228,GO:0000280,GO:0000785,GO:0000790,GO:0000976,GO:0000977,GO:0000978,GO:0000981,GO:0000982,GO:0000987,GO:0000988,GO:0000989,GO:0001012,GO:0001067,GO:0001076,GO:0001077,GO:0001078,GO:0001085,GO:0001103,GO:0001191,GO:0001227,GO:0001228,GO:0003674,GO:0003676,GO:0003677,GO:0003690,GO:0003700,GO:0003723,GO:0005488,GO:0005515,GO:0005575,GO:0005622,GO:…	ko:K09051	ko04011,map04011	Aft1_HRA,Aft1_HRR,Aft1_OSA,bZIP_1	OTHER
159179	By MS/MS	By MS/MS	By matching	By MS/MS	By MS/MS	By MS/MS	By MS/MS	By MS/MS	By MS/MS	By MS/MS	By MS/MS	By MS/MS	618300000	525060000	19229000	724270000	2150000000	1582100000	2285000000	2254800000	641370000	714790000	694240000	176570000	385710000	312520000	0	425280000	961330000	772710000	927010000	758680000	372570000	362700000	347020000	221900000	82508.K1WMC9	8.97e-287	790	COG3425@1|root,KOG1393@2759|Eukaryota,38BNA@33154|Opisthokonta,3NUD4@4751|Fungi,3UYF1@5204|Basidiomycota,3VCSV@5234|Tremellales	4751|Fungi	I	This enzyme condenses acetyl-CoA with acetoacetyl-CoA to form HMG-CoA, which is the substrate for HMG-CoA reductase	ERG13	GO:0003674,GO:0003824,GO:0004421,GO:0005575,GO:0005622,GO:0005623,GO:0005634,GO:0005737,GO:0005783,GO:0006066,GO:0006084,GO:0006139,GO:0006163,GO:0006629,GO:0006637,GO:0006644,GO:0006694,GO:0006696,GO:0006720,GO:0006721,GO:0006725,GO:0006732,GO:0006753,GO:0006790,GO:0006793,GO:0006796,GO:0006807,GO:0008150,GO:0008152,GO:0008202,GO:0008204,GO:0008299,GO:0008610,GO:0008654,GO:0009058,GO:0009117,GO:…	ko:K01641	ko00072,ko00280,ko00650,ko00900,ko01100,ko01110,ko01130,map00072,map00280,map00650,map00900,map01100,map01110,map01130	HMG_CoA_synt_C,HMG_CoA_synt_N	OTHER
159562	NA	NA	NA	NA	By MS/MS	By MS/MS	By MS/MS	By MS/MS	NA	By matching	NA	NA	0	0	0	0	1525800000	1039900000	1395100000	1509400000	0	13904000	0	0	0	0	0	0	332740000	299860000	388710000	265250000	0	0	0	0	NA	NA	NA	NA	NA	NA	NA	NA	NA	NA	NA	NA	OTHER
160277	By MS/MS	By MS/MS	By MS/MS	By MS/MS	By MS/MS	By MS/MS	By MS/MS	By MS/MS	By MS/MS	By MS/MS	By MS/MS	By MS/MS	653340000	632300000	660840000	478330000	528200000	269290000	715400000	318090000	631510000	994710000	985210000	559790000	322860000	343030000	360520000	334410000	208860000	232230000	220640000	167680000	319370000	348730000	337920000	300450000	NA	NA	NA	NA	NA	NA	NA	NA	NA	NA	NA	NA	OTHER
160407	By MS/MS	By MS/MS	By MS/MS	By MS/MS	By MS/MS	By matching	By MS/MS	By MS/MS	By MS/MS	By MS/MS	By MS/MS	By MS/MS	566360000	456990000	597150000	347320000	125920000	107820000	0	103370000	378400000	408710000	560180000	288910000	0	0	0	0	0	0	0	0	0	0	0	0	NA	NA	NA	NA	NA	NA	NA	NA	NA	NA	NA	NA	OTHER
160413	By MS/MS	By MS/MS	By MS/MS	By MS/MS	By MS/MS	By MS/MS	By MS/MS	By MS/MS	By MS/MS	By MS/MS	By MS/MS	By MS/MS	3887900000	3725200000	8753000000	7453900000	5816100000	5698400000	6273000000	7013800000	5460800000	6353400000	7550900000	5223800000	1372600000	1207100000	3432800000	2388600000	1648600000	1397800000	1747400000	1833200000	2166400000	2364600000	2646900000	2504700000	NA	NA	NA	NA	NA	NA	NA	NA	NA	NA	NA	NA	OTHER
161353	By MS/MS	By MS/MS	By MS/MS	By MS/MS	By MS/MS	By MS/MS	By MS/MS	By MS/MS	By MS/MS	By MS/MS	By MS/MS	By MS/MS	1283700000	1322400000	1235500000	951220000	2574300000	1978100000	2137800000	2865800000	1607900000	1626600000	1895300000	733530000	552180000	629310000	510430000	509890000	709730000	658200000	624970000	705870000	606550000	592130000	660760000	536650000	82508.K1W9X1	2.67e-197	557	COG3407@1|root,KOG2833@2759|Eukaryota,38DKK@33154|Opisthokonta,3NW3F@4751|Fungi,3UYB0@5204|Basidiomycota,3VEK6@5234|Tremellales	4751|Fungi	I	diphosphomevalonate decarboxylase	MVD1	GO:0003674,GO:0003824,GO:0004163,GO:0005575,GO:0005622,GO:0005623,GO:0005737,GO:0005829,GO:0006066,GO:0006084,GO:0006139,GO:0006163,GO:0006629,GO:0006637,GO:0006644,GO:0006694,GO:0006696,GO:0006720,GO:0006725,GO:0006732,GO:0006753,GO:0006790,GO:0006793,GO:0006796,GO:0006807,GO:0008150,GO:0008152,GO:0008202,GO:0008204,GO:0008299,GO:0008610,GO:0008654,GO:0009058,GO:0009117,GO:0009150,GO:0009240,GO:…	ko:K01597	ko00900,ko01100,ko01110,ko01130,map00900,map01100,map01110,map01130	GHMP_kinases_N	OTHER
162687	By MS/MS	By MS/MS	By MS/MS	By MS/MS	By MS/MS	By MS/MS	By MS/MS	By MS/MS	By MS/MS	By MS/MS	By MS/MS	By MS/MS	1281700000	1270300000	1959800000	1512600000	2719900000	2018000000	2067300000	2915000000	1432800000	1750600000	1844900000	1981100000	287810000	315950000	418010000	360780000	344000000	389870000	342790000	313340000	306330000	292570000	302250000	351770000	82508.K1VHF0	1.02e-259	719	COG1222@1|root,KOG0727@2759|Eukaryota,39J9B@33154|Opisthokonta,3NUMF@4751|Fungi,3UXU3@5204|Basidiomycota,3VCT4@5234|Tremellales	4751|Fungi	O	Belongs to the AAA ATPase family	RPT3	GO:0000228,GO:0000502,GO:0000785,GO:0000790,GO:0003674,GO:0003824,GO:0005488,GO:0005515,GO:0005575,GO:0005622,GO:0005623,GO:0005634,GO:0005694,GO:0005737,GO:0005829,GO:0005838,GO:0006325,GO:0006355,GO:0006357,GO:0006508,GO:0006511,GO:0006807,GO:0006950,GO:0006996,GO:0007088,GO:0007346,GO:0008134,GO:0008150,GO:0008152,GO:0008540,GO:0009056,GO:0009057,GO:0009889,GO:0009891,GO:0009893,GO:0009894,GO:…	ko:K03063	ko03050,ko05169,map03050,map05169	AAA	OTHER
163577	By MS/MS	By MS/MS	By MS/MS	By MS/MS	By MS/MS	NA	By MS/MS	By MS/MS	NA	By MS/MS	By matching	By MS/MS	248840000	230800000	262700000	237900000	521930000	0	657510000	539040000	0	14055000	50453000	567960000	219740000	230780000	262770000	290010000	198250000	0	263190000	0	0	0	0	242740000	82508.K1WWS9	1.77e-199	579	COG0318@1|root,KOG1176@2759|Eukaryota,3AIZB@33154|Opisthokonta,3Q511@4751|Fungi,3VCHN@5204|Basidiomycota,3VETR@5234|Tremellales	4751|Fungi	I	AMP-binding enzyme	NA	NA	NA	NA	AMP-binding,AMP-binding_C	OTHER
164079	By MS/MS	By MS/MS	By matching	By MS/MS	By matching	By MS/MS	By matching	By matching	By MS/MS	By MS/MS	By MS/MS	By MS/MS	160580000	136520000	152880000	112600000	146340000	178560000	73005000	191060000	149260000	174770000	155330000	183820000	84803000	69958000	80781000	82713000	65755000	107960000	0	71009000	86499000	87749000	69388000	91982000	82508.K1W517	3.76e-180	508	COG5084@1|root,KOG1040@2759|Eukaryota,38HDS@33154|Opisthokonta,3NYHY@4751|Fungi,3V0Y9@5204|Basidiomycota,3VERS@5234|Tremellales	4751|Fungi	A	Zinc knuckle	YTH1	GO:0003674,GO:0003676,GO:0003723,GO:0003824,GO:0004518,GO:0004519,GO:0004521,GO:0004540,GO:0005488,GO:0005575,GO:0005622,GO:0005623,GO:0005634,GO:0005654,GO:0005737,GO:0005829,GO:0005847,GO:0005849,GO:0006139,GO:0006378,GO:0006379,GO:0006396,GO:0006397,GO:0006725,GO:0006807,GO:0008150,GO:0008152,GO:0009987,GO:0010467,GO:0016070,GO:0016071,GO:0016787,GO:0016788,GO:0031123,GO:0031124,GO:0031974,GO:…	ko:K14404	ko03015,ko05164,map03015,map05164	zf-CCCH,zf-CCHC	OTHER
164578	By MS/MS	By MS/MS	By MS/MS	By MS/MS	By MS/MS	By MS/MS	By MS/MS	By MS/MS	By MS/MS	By MS/MS	By MS/MS	By MS/MS	29262000000	40625000000	37302000000	45835000000	27448000000	26753000000	36048000000	33911000000	24183000000	24300000000	27674000000	25109000000	8847500000	12419000000	9207000000	12303000000	5877600000	7998600000	6245000000	6801300000	6085200000	6165000000	5993300000	5797700000	5207.AAW41724	6.05e-81	252	COG0655@1|root,KOG3135@2759|Eukaryota,38HWI@33154|Opisthokonta,3NU10@4751|Fungi,3V0Q4@5204|Basidiomycota,3VF7N@5234|Tremellales	4751|Fungi	S	NADPH-dependent FMN reductase	NA	GO:0000166,GO:0000785,GO:0000792,GO:0003674,GO:0003824,GO:0003955,GO:0005488,GO:0005575,GO:0005622,GO:0005623,GO:0005694,GO:0005737,GO:0005886,GO:0006325,GO:0006342,GO:0006355,GO:0006996,GO:0008150,GO:0008152,GO:0009889,GO:0009890,GO:0009892,GO:0009987,GO:0010181,GO:0010468,GO:0010556,GO:0010558,GO:0010605,GO:0010629,GO:0016020,GO:0016043,GO:0016458,GO:0016491,GO:0016651,GO:0016655,GO:0019219,GO:…	ko:K03809	ko00130,ko01110,map00130,map01110	FMN_red	OTHER
165285	By matching	By MS/MS	By matching	By MS/MS	By MS/MS	By matching	By MS/MS	By MS/MS	By MS/MS	By matching	By MS/MS	By MS/MS	77629000	85690000	91008000	77540000	149040000	115810000	121790000	144040000	78762000	82855000	93323000	759460000	49344000	54355000	52416000	79103000	92808000	58955000	78391000	82496000	73422000	49115000	72629000	343430000	82508.K1WKB3	1.45e-49	182	2CZQZ@1|root,2SBAY@2759|Eukaryota,3AB28@33154|Opisthokonta,3P7ZT@4751|Fungi,3V2R3@5204|Basidiomycota,3VFP9@5234|Tremellales	4751|Fungi	S	PPP4R2	NA	NA	ko:K15425	NA	PPP4R2	OTHER
165652	By matching	By MS/MS	By MS/MS	By MS/MS	By MS/MS	By MS/MS	By MS/MS	By MS/MS	By MS/MS	By MS/MS	By MS/MS	By MS/MS	209540000	394260000	629680000	409530000	500840000	511190000	499250000	608470000	485720000	374310000	459620000	383600000	134120000	161600000	149110000	144110000	121700000	119730000	104490000	86534000	107260000	126090000	111760000	115820000	NA	NA	NA	NA	NA	NA	NA	NA	NA	NA	NA	NA	OTHER
166039	By MS/MS	By MS/MS	By MS/MS	By MS/MS	By MS/MS	By MS/MS	By MS/MS	By MS/MS	By MS/MS	By MS/MS	By MS/MS	By MS/MS	247460000	261520000	251000000	255070000	331830000	207470000	379240000	236490000	282220000	352960000	342560000	241590000	156610000	154740000	150080000	163930000	157100000	0	173710000	0	153530000	177650000	165510000	0	552467.XP_003194612.1	4.4e-117	339	COG1100@1|root,KOG0393@2759|Eukaryota,39VJK@33154|Opisthokonta,3NVG7@4751|Fungi,3UZ66@5204|Basidiomycota,3VEYI@5234|Tremellales	4751|Fungi	U	Belongs to the small GTPase superfamily. Rho family	RHO2	GO:0000166,GO:0001882,GO:0001883,GO:0003674,GO:0003824,GO:0003924,GO:0005488,GO:0005525,GO:0005575,GO:0005623,GO:0006109,GO:0006996,GO:0007010,GO:0007015,GO:0007017,GO:0007154,GO:0007163,GO:0007165,GO:0007264,GO:0008150,GO:0008360,GO:0009889,GO:0009987,GO:0010556,GO:0010675,GO:0010962,GO:0016020,GO:0016043,GO:0016462,GO:0016787,GO:0016817,GO:0016818,GO:0017076,GO:0017111,GO:0019001,GO:0019222,GO:…	ko:K07975	NA	Ras	OTHER
166087	By MS/MS	By MS/MS	By MS/MS	By MS/MS	By MS/MS	By MS/MS	By MS/MS	By matching	By matching	By MS/MS	By matching	By matching	24452000	37956000	9860900	55639000	32021000	13003000	38347000	25195000	38101000	47348000	31617000	32251000	20336000	24140000	0	0	18671000	0	20287000	0	0	30208000	0	0	5217.XP_007005414.1	2.67e-85	263	COG5069@1|root,KOG1700@2759|Eukaryota,3A7P3@33154|Opisthokonta,3P553@4751|Fungi,3V216@5204|Basidiomycota,3VFD6@5234|Tremellales	4751|Fungi	TZ	Zinc-binding domain present in Lin-11, Isl-1, Mec-3.	NA	NA	ko:K09377	NA	LIM	OTHER
166194	By MS/MS	By MS/MS	By MS/MS	By MS/MS	By MS/MS	By MS/MS	By MS/MS	By MS/MS	By MS/MS	By MS/MS	By MS/MS	By MS/MS	6315500000	3720900000	5001500000	2721000000	3856000000	5884200000	4448800000	6380100000	4848600000	6519600000	5417500000	2864400000	4029000000	2344500000	2814200000	1571200000	2311500000	3290800000	2043300000	2673700000	1833700000	3206800000	2481100000	1705300000	82508.K1VH52	7.84e-164	460	COG0098@1|root,KOG0877@2759|Eukaryota,38F84@33154|Opisthokonta,3NWFC@4751|Fungi,3UY0G@5204|Basidiomycota,3VE0A@5234|Tremellales	4751|Fungi	J	Belongs to the universal ribosomal protein uS5 family	RPS2	GO:0002181,GO:0003674,GO:0003676,GO:0003723,GO:0003735,GO:0005198,GO:0005488,GO:0005575,GO:0005622,GO:0005623,GO:0005737,GO:0005829,GO:0005840,GO:0006403,GO:0006405,GO:0006407,GO:0006412,GO:0006417,GO:0006450,GO:0006518,GO:0006611,GO:0006807,GO:0006810,GO:0006886,GO:0006913,GO:0008104,GO:0008150,GO:0008152,GO:0009058,GO:0009059,GO:0009889,GO:0009891,GO:0009893,GO:0009987,GO:0010467,GO:0010468,GO:…	ko:K02981	ko03010,map03010	Ribosomal_S5,Ribosomal_S5_C	OTHER
166557	NA	By matching	NA	NA	By matching	By MS/MS	By MS/MS	By matching	By MS/MS	NA	By matching	By matching	0	19037000	0	0	13968000	32001000	45993000	48043000	57162000	0	47388000	28084000	0	0	0	0	0	18217000	21101000	0	0	0	0	0	82508.K1VDJ6	1.27e-127	372	2E29H@1|root,2S9HK@2759|Eukaryota,39M51@33154|Opisthokonta,3Q5IN@4751|Fungi	4751|Fungi	-	-	NA	NA	NA	NA	-	OTHER
166915	By matching	NA	NA	By matching	By matching	By MS/MS	By matching	By MS/MS	By matching	By matching	By matching	By matching	32081000	0	0	27515000	65820000	41248000	56160000	80407000	32168000	39542000	21479000	35272000	0	0	0	0	0	0	0	0	0	0	0	0	5217.XP_007001979.1	4.21e-112	344	KOG0295@1|root,KOG0295@2759|Eukaryota,38EAS@33154|Opisthokonta,3NW2C@4751|Fungi,3UY6Y@5204|Basidiomycota,3VECF@5234|Tremellales	4751|Fungi	Z	Positively regulates the activity of the minus-end directed microtubule motor protein dynein. Plays a central role in positioning the mitotic spindle at the bud neck during cell division. Targets cytoplasmic dynein to microtubule plus ends, thereby promoting dynein-mediated microtubule sliding along the bud cortex and consequently the movement of the mitotic spindle to the bud neck	LIS1	GO:0000003,GO:0000132,GO:0000226,GO:0000278,GO:0000775,GO:0000776,GO:0000922,GO:0003006,GO:0003674,GO:0005488,GO:0005515,GO:0005575,GO:0005622,GO:0005623,GO:0005634,GO:0005694,GO:0005737,GO:0005815,GO:0005816,GO:0005819,GO:0005856,GO:0005874,GO:0005875,GO:0005881,GO:0005938,GO:0006810,GO:0006928,GO:0006996,GO:0007010,GO:0007017,GO:0007018,GO:0007049,GO:0007097,GO:0007163,GO:0008017,GO:0008092,GO:…	ko:K16794	ko00565,ko01100,map00565,map01100	WD40	OTHER
166988	By MS/MS	By matching	By MS/MS	By MS/MS	By MS/MS	By MS/MS	By MS/MS	By MS/MS	By MS/MS	By MS/MS	By MS/MS	By MS/MS	127960000	150680000	94360000	58318000	628780000	862490000	816220000	1159500000	123810000	532710000	189800000	58616000	161910000	147050000	204000000	147500000	252810000	187750000	272940000	220300000	192370000	169250000	198090000	131550000	5217.XP_007001835.1	0	1100	KOG0379@1|root,KOG0379@2759|Eukaryota,38C0C@33154|Opisthokonta,3NXSA@4751|Fungi,3UYA9@5204|Basidiomycota,3VD1C@5234|Tremellales	4751|Fungi	S	Kelch motif	NA	GO:0000133,GO:0000278,GO:0000281,GO:0000910,GO:0000935,GO:0005575,GO:0005622,GO:0005623,GO:0005737,GO:0005856,GO:0005874,GO:0005875,GO:0005881,GO:0005938,GO:0007049,GO:0007163,GO:0008104,GO:0008150,GO:0008360,GO:0009987,GO:0010639,GO:0015630,GO:0022402,GO:0022603,GO:0022604,GO:0030427,GO:0030428,GO:0031110,GO:0031111,GO:0031113,GO:0031115,GO:0031333,GO:0031500,GO:0032153,GO:0032155,GO:0032187,GO:…	NA	NA	Kelch_1,Kelch_3,Kelch_4,Kelch_5	OTHER
167442	By MS/MS	By MS/MS	By MS/MS	By MS/MS	By MS/MS	By matching	By matching	By MS/MS	By MS/MS	By MS/MS	By MS/MS	By MS/MS	57995000	37279000	59806000	29684000	69714000	49009000	81707000	82541000	56641000	68964000	86821000	66465000	0	0	0	0	0	0	0	0	0	0	0	0	984962.XP_009543222.1	5.37e-20	84	KOG4779@1|root,KOG4779@2759|Eukaryota,3A8CZ@33154|Opisthokonta,3P6U8@4751|Fungi,3V34K@5204|Basidiomycota,22AM9@155619|Agaricomycetes,3H68E@355688|Agaricomycetes incertae sedis	4751|Fungi	S	Yos1-like protein	NA	GO:0000139,GO:0005575,GO:0005622,GO:0005623,GO:0005737,GO:0005783,GO:0005789,GO:0005794,GO:0005798,GO:0006810,GO:0006886,GO:0006888,GO:0008104,GO:0008150,GO:0012505,GO:0015031,GO:0015833,GO:0016020,GO:0016021,GO:0016192,GO:0030134,GO:0030135,GO:0030173,GO:0031090,GO:0031224,GO:0031228,GO:0031300,GO:0031301,GO:0031410,GO:0031982,GO:0031984,GO:0033036,GO:0034613,GO:0042175,GO:0042886,GO:0043226,GO:…	NA	NA	Yos1	OTHER
168224	By matching	By matching	By matching	By matching	By MS/MS	By MS/MS	By MS/MS	By MS/MS	By matching	By matching	By matching	By matching	42197000	48045000	70826000	60729000	132050000	115230000	115200000	118750000	80062000	65149000	78692000	69393000	0	34239000	42815000	44009000	51175000	55864000	46151000	57974000	42965000	37131000	42345000	42203000	82508.K1VBS4	2.14e-245	717	COG0642@1|root,COG5169@1|root,KOG0519@2759|Eukaryota,KOG0627@2759|Eukaryota,38FXX@33154|Opisthokonta,3NV9B@4751|Fungi,3UYNA@5204|Basidiomycota,3VCT5@5234|Tremellales	4751|Fungi	K	heat shock factor	SKN7	GO:0000156,GO:0000160,GO:0000228,GO:0000302,GO:0000304,GO:0000785,GO:0000790,GO:0000976,GO:0000977,GO:0000978,GO:0000981,GO:0000982,GO:0000987,GO:0001012,GO:0001067,GO:0001077,GO:0001228,GO:0002831,GO:0002833,GO:0003674,GO:0003676,GO:0003677,GO:0003690,GO:0003700,GO:0005488,GO:0005515,GO:0005575,GO:0005622,GO:0005623,GO:0005634,GO:0005667,GO:0005694,GO:0005737,GO:0005829,GO:0006139,GO:0006351,GO:…	ko:K15859	ko02020,map02020	HSF_DNA-bind,Response_reg	OTHER
170631	NA	By matching	By MS/MS	By MS/MS	By MS/MS	By MS/MS	By MS/MS	By MS/MS	By MS/MS	By matching	By MS/MS	By MS/MS	0	10794000	295340000	228400000	275580000	353080000	296980000	311760000	235860000	146000000	138300000	225120000	0	0	60674000	0	72457000	85453000	57291000	63886000	82183000	72684000	71668000	108660000	5217.XP_007001777.1	2.43e-269	819	COG0642@1|root,KOG0519@2759|Eukaryota,38EIJ@33154|Opisthokonta,3NVY0@4751|Fungi,3UYEV@5204|Basidiomycota,3VGF0@5234|Tremellales	4751|Fungi	T	Domain present in phytochromes and cGMP-specific phosphodiesterases.	NA	NA	NA	NA	HATPase_c,HisKA,Response_reg	OTHER
170810	By matching	By MS/MS	By matching	By matching	By MS/MS	By MS/MS	By MS/MS	By MS/MS	By matching	By matching	By matching	By matching	17556000	16420000	13463000	9702700	92098000	85597000	95674000	78131000	24082000	40081000	28238000	103910000	0	0	0	0	0	0	0	0	0	0	0	0	82508.K1V1B2	1.94e-117	356	COG0726@1|root,2QZU8@2759|Eukaryota,39V04@33154|Opisthokonta,3NZUV@4751|Fungi,3V06G@5204|Basidiomycota,3VEBE@5234|Tremellales	4751|Fungi	O	Polysaccharide deacetylase	NA	GO:0003674,GO:0003824,GO:0004099,GO:0005575,GO:0008150,GO:0009653,GO:0009987,GO:0010927,GO:0016020,GO:0016043,GO:0016787,GO:0016810,GO:0016811,GO:0019213,GO:0022607,GO:0030154,GO:0030435,GO:0032502,GO:0032989,GO:0042244,GO:0042546,GO:0043934,GO:0044085,GO:0045229,GO:0048646,GO:0048856,GO:0048869,GO:0070590,GO:0070726,GO:0071554,GO:0071555,GO:0071840	ko:K01452	ko00520,ko01100,map00520,map01100	Polysacc_deac_1	SP
170824	By MS/MS	By MS/MS	By MS/MS	By MS/MS	By MS/MS	By MS/MS	By MS/MS	By MS/MS	By MS/MS	By MS/MS	By MS/MS	By MS/MS	803370000	780230000	761740000	680170000	3163300000	2132100000	2780500000	2563300000	895000000	931260000	1156800000	1124600000	321980000	341560000	316200000	302380000	712110000	612370000	623430000	637430000	404260000	347450000	370550000	417280000	82508.K1VFQ1	2.79e-189	533	KOG2190@1|root,KOG2190@2759|Eukaryota,38G1X@33154|Opisthokonta,3NW5E@4751|Fungi,3UXYW@5204|Basidiomycota,3VCMC@5234|Tremellales	4751|Fungi	A	Pfam:KH_3	HEK2	GO:0000228,GO:0000723,GO:0000781,GO:0000784,GO:0000932,GO:0001932,GO:0001933,GO:0003674,GO:0003676,GO:0003723,GO:0003729,GO:0003730,GO:0005488,GO:0005575,GO:0005622,GO:0005623,GO:0005634,GO:0005694,GO:0005737,GO:0006139,GO:0006259,GO:0006278,GO:0006403,GO:0006725,GO:0006807,GO:0006996,GO:0007004,GO:0008150,GO:0008152,GO:0008298,GO:0009058,GO:0009059,GO:0009892,GO:0009893,GO:0009894,GO:0009895,GO:…	ko:K18738	NA	KH_1	OTHER
171014	NA	By matching	By matching	By MS/MS	NA	NA	By MS/MS	By matching	By matching	NA	NA	NA	0	8374000	64300000	191530000	0	0	28113000	3262700	6905700	0	0	0	0	0	0	0	0	0	0	0	0	0	0	0	82508.K1V3L8	7.87e-199	602	2CXIG@1|root,2RXUE@2759|Eukaryota,39SEM@33154|Opisthokonta,3P0GC@4751|Fungi,3V0H9@5204|Basidiomycota,3VDV9@5234|Tremellales	4751|Fungi	U	Domain of unknown function (DUF4203)	NA	NA	NA	NA	DUF4203	SP
171238	By MS/MS	By MS/MS	By MS/MS	By MS/MS	By MS/MS	By MS/MS	By MS/MS	By MS/MS	By MS/MS	By MS/MS	By MS/MS	By MS/MS	1473800000	1560100000	1191300000	1219000000	1732200000	1723400000	2374400000	2567600000	1099300000	2040900000	1517100000	1600000000	291700000	289480000	316290000	286670000	296940000	283080000	280410000	256080000	313940000	321760000	282640000	288510000	NA	NA	NA	NA	NA	NA	NA	NA	NA	NA	NA	NA	OTHER
171402	By MS/MS	By MS/MS	By MS/MS	By MS/MS	By MS/MS	By MS/MS	By MS/MS	By MS/MS	By MS/MS	By MS/MS	By MS/MS	By MS/MS	85069000	74867000	71507000	60604000	68048000	80547000	68894000	73961000	60754000	65868000	93808000	99661000	47600000	43841000	38691000	36282000	30168000	41861000	31437000	31112000	35380000	33988000	44889000	47638000	5346.XP_001833752.2	8.16e-15	70.5	2C2U9@1|root,2SBJR@2759|Eukaryota,3AC00@33154|Opisthokonta,3P8SM@4751|Fungi,3V2V7@5204|Basidiomycota,22B2S@155619|Agaricomycetes,3W849@5338|Agaricales	4751|Fungi	S	CBP4	NA	NA	NA	NA	CBP4	OTHER
172812	By MS/MS	By MS/MS	By MS/MS	By MS/MS	By MS/MS	By MS/MS	By MS/MS	By MS/MS	By MS/MS	By MS/MS	By MS/MS	By MS/MS	1372700000	1773500000	209520000	226040000	1874900000	1152200000	2067700000	2223000000	1652100000	1453400000	2262900000	1674300000	955390000	754520000	1365900000	1296900000	791790000	898550000	1222900000	970070000	1510400000	1087900000	1266200000	911460000	5217.XP_007001779.1	5.57e-130	425	KOG1844@1|root,KOG1844@2759|Eukaryota,39TI7@33154|Opisthokonta,3NYTJ@4751|Fungi,3V1JY@5204|Basidiomycota,3VE6X@5234|Tremellales	4751|Fungi	S	Transcription factor binding protein	CTI6	GO:0000118,GO:0000228,GO:0000785,GO:0000790,GO:0003674,GO:0003824,GO:0005488,GO:0005515,GO:0005575,GO:0005622,GO:0005623,GO:0005634,GO:0005654,GO:0005694,GO:0005737,GO:0006275,GO:0006325,GO:0006338,GO:0006355,GO:0006357,GO:0006464,GO:0006476,GO:0006807,GO:0006996,GO:0008134,GO:0008150,GO:0008152,GO:0009889,GO:0009891,GO:0009893,GO:0009987,GO:0010468,GO:0010556,GO:0010557,GO:0010604,GO:0010628,GO:…	NA	NA	PHD	OTHER
172965	NA	NA	NA	NA	By MS/MS	By MS/MS	By MS/MS	By MS/MS	NA	NA	NA	By matching	0	0	0	0	246060000	131920000	230000000	249270000	0	0	0	32450000	0	0	0	0	93412000	78167000	96871000	89282000	0	0	0	0	82508.K1V329	3.09e-180	547	COG0679@1|root,KOG2722@2759|Eukaryota,38EXJ@33154|Opisthokonta,3NUHS@4751|Fungi,3UYY3@5204|Basidiomycota,3VDVT@5234|Tremellales	4751|Fungi	S	Membrane transport protein	NA	GO:0003674,GO:0005215,GO:0005575,GO:0005622,GO:0005623,GO:0005737,GO:0005783,GO:0006810,GO:0008150,GO:0012505,GO:0016020,GO:0016021,GO:0022857,GO:0031224,GO:0043226,GO:0043227,GO:0043229,GO:0043231,GO:0044424,GO:0044425,GO:0044444,GO:0044464,GO:0051179,GO:0051234,GO:0055085	ko:K07088	NA	Mem_trans	OTHER
174327	By matching	By MS/MS	By matching	By MS/MS	By MS/MS	By MS/MS	By MS/MS	By MS/MS	By MS/MS	By MS/MS	By MS/MS	By MS/MS	282510000	330480000	142280000	141180000	787430000	526850000	717370000	856130000	243090000	312020000	392930000	281840000	257270000	343620000	0	0	338730000	401500000	0	482980000	289520000	235050000	255530000	266370000	82508.K1VML7	1.24e-66	213	COG0702@1|root,KOG1203@2759|Eukaryota,3A4ZW@33154|Opisthokonta,3P46B@4751|Fungi,3V1BC@5204|Basidiomycota,3VGXH@5234|Tremellales	4751|Fungi	G	NAD(P)H-binding	NA	GO:0005575,GO:0005622,GO:0005623,GO:0005737,GO:0044424,GO:0044464	NA	NA	NAD_binding_10	OTHER
177727	By MS/MS	By MS/MS	By MS/MS	By MS/MS	By MS/MS	By MS/MS	By MS/MS	By MS/MS	By MS/MS	By MS/MS	By MS/MS	By MS/MS	514040000	491630000	472010000	462170000	2329800000	2019800000	2487300000	2194400000	523000000	487510000	466820000	581910000	225230000	176120000	73093000	158580000	996290000	553370000	1077700000	438350000	191810000	216970000	149070000	203100000	5207.AAW44730	1.11e-53	178	KOG0533@1|root,KOG0533@2759|Eukaryota,39YV4@33154|Opisthokonta,3NXQF@4751|Fungi,3V1FZ@5204|Basidiomycota,3VFV0@5234|Tremellales	4751|Fungi	A	RNA recognition motif	YRA1	GO:0000346,GO:0003674,GO:0003676,GO:0003723,GO:0004857,GO:0005488,GO:0005575,GO:0005622,GO:0005623,GO:0005634,GO:0006139,GO:0006259,GO:0006281,GO:0006283,GO:0006289,GO:0006403,GO:0006405,GO:0006406,GO:0006611,GO:0006725,GO:0006807,GO:0006810,GO:0006886,GO:0006913,GO:0006950,GO:0006974,GO:0008104,GO:0008150,GO:0008152,GO:0009987,GO:0010467,GO:0015031,GO:0015833,GO:0015931,GO:0016973,GO:0030234,GO:…	ko:K12881	ko03013,ko03015,ko03040,ko05168,map03013,map03015,map03040,map05168	FoP_duplication,RRM_1	OTHER
178422	By MS/MS	By MS/MS	By MS/MS	By MS/MS	By MS/MS	By MS/MS	By MS/MS	By MS/MS	By MS/MS	By MS/MS	By MS/MS	By MS/MS	7973400000	8531300000	9227800000	7939300000	9967100000	8354500000	10415000000	11230000000	8508100000	8959600000	10923000000	10403000000	1957700000	1954500000	2132300000	2022400000	1510600000	1617300000	1737100000	1543600000	1949100000	2069900000	1885500000	2237900000	552467.XP_003194226.1	4.71e-276	765	KOG3870@1|root,KOG3870@2759|Eukaryota,38G0A@33154|Opisthokonta,3NVVV@4751|Fungi,3UY9T@5204|Basidiomycota,3VE21@5234|Tremellales	4751|Fungi	S	Protein of unknown function DUF89	HRT2	GO:0003674,GO:0003824,GO:0005575,GO:0005622,GO:0005623,GO:0005634,GO:0005737,GO:0006793,GO:0006796,GO:0008150,GO:0008152,GO:0009636,GO:0009987,GO:0016311,GO:0016787,GO:0016788,GO:0016791,GO:0042221,GO:0042578,GO:0043226,GO:0043227,GO:0043229,GO:0043231,GO:0044237,GO:0044424,GO:0044464,GO:0050896,GO:0051716,GO:0070887,GO:0097237,GO:0098754,GO:1990748	NA	NA	DUF89	OTHER
179231	By matching	By matching	By matching	By matching	By MS/MS	By MS/MS	By MS/MS	By MS/MS	By MS/MS	By matching	By matching	By MS/MS	83067000	123520000	132460000	129760000	232090000	182230000	254530000	246970000	160620000	129060000	104170000	148580000	0	48259000	0	52051000	62901000	67116000	64082000	56135000	46221000	0	52617000	64173000	82508.K1V0R2	6.65e-308	887	COG5594@1|root,KOG1134@2759|Eukaryota,38CBQ@33154|Opisthokonta,3NY6R@4751|Fungi,3UY9X@5204|Basidiomycota,3VE47@5234|Tremellales	4751|Fungi	S	Cytosolic domain of 10TM putative phosphate transporter	NA	GO:0000322,GO:0000323,GO:0000324,GO:0000329,GO:0003674,GO:0005215,GO:0005216,GO:0005227,GO:0005261,GO:0005575,GO:0005622,GO:0005623,GO:0005737,GO:0005773,GO:0005774,GO:0005783,GO:0006810,GO:0006811,GO:0006812,GO:0006816,GO:0008150,GO:0008324,GO:0012505,GO:0015075,GO:0015085,GO:0015267,GO:0015318,GO:0016020,GO:0016021,GO:0022803,GO:0022836,GO:0022838,GO:0022839,GO:0022857,GO:0022890,GO:0030001,GO:…	ko:K21989	NA	PHM7_cyt,RSN1_7TM,RSN1_TM	OTHER
179907	By matching	NA	NA	NA	NA	NA	NA	NA	By MS/MS	NA	NA	By MS/MS	64111000	0	0	0	0	0	0	0	70074000	0	0	60291000	0	0	0	0	0	0	0	0	0	0	0	0	82508.K1W8W2	2.02e-160	490	2CZIV@1|root,2SAK5@2759|Eukaryota,3A8DR@33154|Opisthokonta,3P7P4@4751|Fungi,3V27Z@5204|Basidiomycota,3VDNI@5234|Tremellales	4751|Fungi	S	rRNA processing/ribosome biogenesis	NA	NA	NA	NA	RIX1	OTHER
181119	By MS/MS	By MS/MS	By MS/MS	By MS/MS	By MS/MS	By MS/MS	By MS/MS	By MS/MS	By MS/MS	By MS/MS	By MS/MS	By MS/MS	11659000000	9265400000	12203000000	11214000000	16550000000	13299000000	16376000000	15522000000	13897000000	13863000000	13259000000	12670000000	3470100000	2833800000	3413200000	3416900000	2812600000	3126700000	2998400000	2571000000	3399100000	3331300000	3035300000	3210100000	552467.XP_003191226.1	1.77e-74	228	KOG3366@1|root,KOG3366@2759|Eukaryota,39YEZ@33154|Opisthokonta,3P34B@4751|Fungi,3V0RC@5204|Basidiomycota,3VFQE@5234|Tremellales	4751|Fungi	C	Mitochondrial membrane ATP synthase (F(1)F(0) ATP synthase or Complex V) produces ATP from ADP in the presence of a proton gradient across the membrane which is generated by electron transport complexes of the respiratory chain. F-type ATPases consist of two structural domains, F(1) - containing the extramembraneous catalytic core, and F(0) - containing the membrane proton channel, linked togethe…	ATP7	GO:0000274,GO:0000276,GO:0003674,GO:0005198,GO:0005575,GO:0005622,GO:0005623,GO:0005737,GO:0005739,GO:0005740,GO:0005743,GO:0005753,GO:0006091,GO:0006119,GO:0006139,GO:0006163,GO:0006164,GO:0006725,GO:0006753,GO:0006754,GO:0006793,GO:0006796,GO:0006807,GO:0006810,GO:0006811,GO:0006812,GO:0006839,GO:0008150,GO:0008152,GO:0009058,GO:0009117,GO:0009123,GO:0009124,GO:0009126,GO:0009127,GO:0009141,GO:…	ko:K02138	ko00190,ko01100,ko04714,ko05010,ko05012,ko05016,map00190,map01100,map04714,map05010,map05012,map05016	Mt_ATP-synt_D	OTHER
183015	By matching	By matching	By matching	By matching	By MS/MS	By MS/MS	By MS/MS	By matching	NA	By matching	NA	NA	7102200	7601600	5156900	6772100	70297000	30726000	21729000	31462000	0	32068000	0	0	0	0	0	0	0	0	0	0	0	0	0	0	5207.AAW44628	5.37e-170	482	KOG1566@1|root,KOG1566@2759|Eukaryota,38D3U@33154|Opisthokonta,3NY6M@4751|Fungi,3UZG7@5204|Basidiomycota,3VEE1@5234|Tremellales	4751|Fungi	S	Transcriptional repressor	HYM1	GO:0000003,GO:0000131,GO:0000920,GO:0003674,GO:0003824,GO:0004672,GO:0005575,GO:0005622,GO:0005623,GO:0005634,GO:0005737,GO:0005815,GO:0005816,GO:0005856,GO:0005933,GO:0005937,GO:0006355,GO:0006464,GO:0006468,GO:0006793,GO:0006796,GO:0006807,GO:0007114,GO:0007117,GO:0007118,GO:0008104,GO:0008150,GO:0008152,GO:0008360,GO:0009889,GO:0009987,GO:0010468,GO:0010556,GO:0015630,GO:0016301,GO:0016310,GO:…	ko:K08272	ko04150,ko04152,map04150,map04152	Mo25	OTHER
187249	By MS/MS	By MS/MS	By MS/MS	By MS/MS	By MS/MS	By MS/MS	By MS/MS	By MS/MS	By MS/MS	By MS/MS	By MS/MS	By MS/MS	146840000	73709000	149850000	208860000	218180000	199540000	153850000	227620000	69290000	138540000	174380000	174960000	49330000	37529000	45495000	67489000	36732000	41149000	36680000	39529000	34705000	36998000	49375000	33211000	82508.K1VGI0	0	1215	28IQG@1|root,2QR1M@2759|Eukaryota,39S98@33154|Opisthokonta,3NX6Y@4751|Fungi,3V5CS@5204|Basidiomycota,3VCNF@5234|Tremellales	4751|Fungi	K	Fungal specific transcription factor domain	NA	NA	NA	NA	Fungal_trans,Zn_clus	OTHER
189345	By matching	By matching	NA	By matching	By MS/MS	By matching	By MS/MS	By matching	NA	By matching	NA	By matching	34582000	27473000	0	31972000	78146000	70606000	64706000	63731000	0	44956000	0	30992000	0	0	0	0	0	0	0	0	0	0	0	0	82508.K1VNB8	2.64e-12	76.3	2D0DX@1|root,2SDUE@2759|Eukaryota,38ITE@33154|Opisthokonta,3PKQP@4751|Fungi,3VAK1@5204|Basidiomycota,3VHF2@5234|Tremellales	4751|Fungi	S	TFIIIC subunit	NA	NA	NA	NA	TFIIIC_sub6	OTHER
190181	NA	NA	NA	NA	By matching	By matching	By matching	By MS/MS	NA	NA	NA	NA	0	0	0	0	48887000	28369000	38886000	32184000	0	0	0	0	0	0	0	0	0	0	0	0	0	0	0	0	162425.CADANIAP00002892	9.47e-48	174	COG0388@1|root,KOG0806@2759|Eukaryota,39TKE@33154|Opisthokonta,3NWPN@4751|Fungi,3QRDI@4890|Ascomycota,20AZW@147545|Eurotiomycetes	4751|Fungi	E	Carbon-nitrogen hydrolase	NA	GO:0006807,GO:0008150,GO:0008152	NA	NA	Asp_Glu_race,CN_hydrolase	OTHER
191557	By matching	By matching	By MS/MS	By matching	By matching	By matching	By matching	By matching	By matching	By matching	By matching	By matching	7594600	4323200	18804000	18978000	40173000	6317400	37973000	40980000	14462000	22753000	24817000	20923000	0	0	0	0	0	0	0	0	0	0	0	0	5207.AAW45480	1.15e-66	226	2C17K@1|root,2QTPC@2759|Eukaryota,38C8V@33154|Opisthokonta,3NUYY@4751|Fungi,3UYG8@5204|Basidiomycota,3VCZX@5234|Tremellales	2759|Eukaryota	K	Fungal specific transcription factor domain	NA	NA	NA	NA	Fungal_trans,Zn_clus	OTHER
192606	NA	NA	NA	NA	By matching	By matching	By matching	By MS/MS	NA	NA	By matching	NA	0	0	0	0	45483000	35604000	42865000	35786000	0	0	10448000	0	0	0	0	0	0	0	0	0	0	0	0	0	NA	NA	NA	NA	NA	NA	NA	NA	NA	NA	NA	NA	OTHER
192901	By MS/MS	By MS/MS	By MS/MS	By MS/MS	By MS/MS	By MS/MS	By MS/MS	By MS/MS	By MS/MS	By MS/MS	By MS/MS	By MS/MS	1019500000	968970000	1184300000	1206100000	396200000	240330000	357000000	295730000	883440000	903370000	930880000	627710000	346410000	356640000	417130000	494810000	103230000	78626000	101920000	74131000	289020000	278370000	258690000	204130000	82508.K1VNT4	4.24e-125	368	28M44@1|root,2QTM1@2759|Eukaryota,3A10S@33154|Opisthokonta,3P21I@4751|Fungi,3VBW8@5204|Basidiomycota,3VDTS@5234|Tremellales	4751|Fungi	S	Putative cyclase	NA	NA	NA	NA	Cyclase	OTHER
194463	By MS/MS	By MS/MS	By MS/MS	By MS/MS	By MS/MS	By MS/MS	By MS/MS	By MS/MS	By MS/MS	By MS/MS	By MS/MS	By MS/MS	496990000	542510000	395460000	461200000	509970000	477780000	661450000	190160000	473250000	455030000	650930000	508560000	278430000	295480000	262720000	262490000	203970000	219980000	258380000	181900000	211220000	219430000	245780000	220490000	82508.K1V2U5	4.7e-124	364	COG5041@1|root,KOG3092@2759|Eukaryota,38EN5@33154|Opisthokonta,3NXI9@4751|Fungi,3UY4A@5204|Basidiomycota,3VEKT@5234|Tremellales	4751|Fungi	DKT	Plays a complex role in regulating the basal catalytic activity of the alpha subunit	CKB1	GO:0001932,GO:0001933,GO:0003674,GO:0004857,GO:0004860,GO:0005575,GO:0005622,GO:0005623,GO:0005634,GO:0005730,GO:0005956,GO:0006355,GO:0006356,GO:0006359,GO:0006464,GO:0006468,GO:0006469,GO:0006793,GO:0006796,GO:0006807,GO:0006950,GO:0006974,GO:0007154,GO:0007165,GO:0008150,GO:0008152,GO:0009889,GO:0009892,GO:0009987,GO:0010468,GO:0010556,GO:0010563,GO:0010605,GO:0016310,GO:0018105,GO:0018107,GO:…	ko:K03115	ko03008,ko04064,ko04137,ko04139,ko04310,ko04520,ko04712,ko05162,ko05168,ko05169,map03008,map04064,map04137,map04139,map04310,map04520,map04712,map05162,map05168,map05169	CK_II_beta	OTHER
195614	By MS/MS	By MS/MS	By MS/MS	By MS/MS	By MS/MS	By MS/MS	By MS/MS	By MS/MS	By MS/MS	By MS/MS	By MS/MS	By MS/MS	1097600000	1024100000	657930000	861530000	1168000000	970790000	1302600000	1452000000	1236800000	845860000	1462000000	1270700000	235260000	261750000	218340000	232590000	197320000	202320000	219870000	224670000	229180000	220230000	226810000	230840000	82508.K1VBU7	8.93e-52	174	2D053@1|root,2SCUH@2759|Eukaryota,3ADS9@33154|Opisthokonta,3P9VD@4751|Fungi	4751|Fungi	-	-	NA	NA	NA	NA	Cupin_2	OTHER
195692	By MS/MS	By MS/MS	By MS/MS	By MS/MS	By MS/MS	By MS/MS	By MS/MS	By MS/MS	By MS/MS	By MS/MS	By MS/MS	By MS/MS	2549300000	2898500000	2386500000	2026000000	3476900000	3268600000	3797300000	4036900000	1774000000	1794300000	2820700000	2569700000	1421300000	1411000000	1189500000	1096300000	1359100000	1452700000	1323800000	1460800000	950520000	888690000	1209000000	1345900000	82508.K1V9V9	3.34e-107	310	COG0094@1|root,KOG0397@2759|Eukaryota,38BMT@33154|Opisthokonta,3NTW9@4751|Fungi,3UZCI@5204|Basidiomycota,3VD7D@5234|Tremellales	4751|Fungi	J	Belongs to the universal ribosomal protein uL5 family	RPL11	GO:0000027,GO:0002181,GO:0003674,GO:0003676,GO:0003723,GO:0003735,GO:0005198,GO:0005488,GO:0005575,GO:0005622,GO:0005623,GO:0005737,GO:0005829,GO:0005840,GO:0006412,GO:0006518,GO:0006807,GO:0006996,GO:0008150,GO:0008152,GO:0009058,GO:0009059,GO:0009987,GO:0010467,GO:0015934,GO:0015935,GO:0016043,GO:0019538,GO:0022607,GO:0022613,GO:0022618,GO:0022625,GO:0022626,GO:0022627,GO:0032991,GO:0034622,GO:…	ko:K02868	ko03010,map03010	Ribosomal_L5,Ribosomal_L5_C	OTHER
197056	By MS/MS	By MS/MS	By matching	By MS/MS	NA	NA	NA	NA	By matching	By matching	By matching	By matching	26982000	25552000	54807000	50272000	0	0	0	0	15599000	23967000	18295000	9529000	0	0	0	0	0	0	0	0	0	0	0	0	NA	NA	NA	NA	NA	NA	NA	NA	NA	NA	NA	NA	OTHER
197128	By MS/MS	By MS/MS	By MS/MS	By MS/MS	By MS/MS	By MS/MS	By MS/MS	By MS/MS	By MS/MS	By MS/MS	By MS/MS	By MS/MS	323460000	364030000	321470000	244190000	470810000	429700000	406270000	500730000	334590000	334660000	442720000	257960000	0	208470000	217690000	0	0	0	0	0	205070000	0	0	341180000	140110.NechaP66818	2.09e-165	481	COG2133@1|root,2QPZ1@2759|Eukaryota,39SSC@33154|Opisthokonta,3NVWQ@4751|Fungi,3QKJP@4890|Ascomycota,215B1@147550|Sordariomycetes,3TEDU@5125|Hypocreales,1FM3H@110618|Nectriaceae	4751|Fungi	G	Glucose sorbosone dehydrogenase	NA	NA	NA	NA	-	SP
199659	NA	NA	NA	NA	By MS/MS	By MS/MS	By MS/MS	By matching	NA	NA	NA	NA	0	0	0	0	255460000	251150000	218470000	235270000	0	0	0	0	0	0	0	0	97731000	113860000	91814000	77433000	0	0	0	0	82508.K1VN56	1.86e-71	247	COG1252@1|root,KOG2495@2759|Eukaryota,3A0NB@33154|Opisthokonta,3P31T@4751|Fungi,3V0NM@5204|Basidiomycota,3VHJX@5234|Tremellales	4751|Fungi	C	Pyridine nucleotide-disulphide oxidoreductase	NA	NA	NA	NA	Pyr_redox_2	OTHER
200766	By MS/MS	By MS/MS	By MS/MS	By MS/MS	By MS/MS	NA	By matching	NA	By matching	By MS/MS	By matching	NA	22950000	20791000	21587000	25686000	23760000	0	26433000	0	21641000	22244000	18833000	0	0	0	0	0	0	0	0	0	0	0	0	0	NA	NA	NA	NA	NA	NA	NA	NA	NA	NA	NA	NA	OTHER
201091	By MS/MS	By MS/MS	By MS/MS	By MS/MS	By matching	By MS/MS	By matching	By MS/MS	By matching	By matching	By matching	By matching	606210000	518720000	609450000	655770000	346780000	229060000	445370000	233970000	174800000	224360000	229580000	303640000	0	0	0	0	0	0	0	0	0	0	0	0	NA	NA	NA	NA	NA	NA	NA	NA	NA	NA	NA	NA	SP
203141	By MS/MS	By MS/MS	By MS/MS	By MS/MS	By MS/MS	By MS/MS	By MS/MS	By MS/MS	By MS/MS	By MS/MS	By MS/MS	By MS/MS	9007800000	9098300000	9553500000	7492200000	7589400000	5714100000	5567100000	8363500000	9273900000	9415100000	11211000000	8591400000	2181400000	2189800000	2585600000	2262300000	1467400000	1589100000	1332600000	1538200000	2249400000	1877100000	2344800000	1841800000	82508.K1W534	7.86e-188	528	COG0214@1|root,KOG1606@2759|Eukaryota,38HZF@33154|Opisthokonta,3NVDT@4751|Fungi,3UZF1@5204|Basidiomycota,3VE95@5234|Tremellales	4751|Fungi	H	SOR/SNZ family	SNZ1	GO:0000096,GO:0000097,GO:0003674,GO:0003824,GO:0003922,GO:0005575,GO:0005576,GO:0006082,GO:0006520,GO:0006534,GO:0006535,GO:0006563,GO:0006725,GO:0006766,GO:0006767,GO:0006790,GO:0006807,GO:0008150,GO:0008152,GO:0008614,GO:0008615,GO:0008652,GO:0009058,GO:0009069,GO:0009070,GO:0009110,GO:0009987,GO:0016053,GO:0016874,GO:0016879,GO:0016884,GO:0017144,GO:0018130,GO:0019344,GO:0019438,GO:0019752,GO:…	ko:K06215	ko00750,map00750	SOR_SNZ	OTHER
203458	By MS/MS	By MS/MS	By MS/MS	By MS/MS	By MS/MS	By MS/MS	By MS/MS	By MS/MS	By MS/MS	By MS/MS	By MS/MS	By MS/MS	4241700000	5627900000	4338500000	4986000000	11349000000	9439800000	11255000000	12196000000	6528900000	6427100000	7771400000	6991100000	1230600000	1545200000	895030000	1074000000	1450100000	1990700000	1757800000	1908100000	1543400000	1474700000	1546800000	1519300000	82508.K1WXS0	8.39e-151	441	28MZB@1|root,2QUI6@2759|Eukaryota,38HPW@33154|Opisthokonta,3NZ44@4751|Fungi,3V0FB@5204|Basidiomycota,3VDPE@5234|Tremellales	4751|Fungi	S	von Willebrand factor (vWF) type A domain	NA	NA	NA	NA	vWA-TerF-like	OTHER
204161	By MS/MS	By MS/MS	By MS/MS	By MS/MS	By MS/MS	By MS/MS	By MS/MS	By MS/MS	By MS/MS	By MS/MS	By MS/MS	By MS/MS	64831000	148500000	250110000	75475000	387510000	290780000	330320000	366440000	49311000	52156000	296630000	339790000	133810000	108150000	136100000	155560000	151270000	153890000	166220000	159070000	0	0	131950000	167830000	NA	NA	NA	NA	NA	NA	NA	NA	NA	NA	NA	NA	OTHER
205229	NA	NA	By MS/MS	By MS/MS	By MS/MS	By MS/MS	By MS/MS	By MS/MS	By MS/MS	By matching	By matching	By MS/MS	0	0	28166000	32551000	82275000	45351000	96973000	94193000	27257000	18795000	32914000	30327000	0	0	0	0	36011000	0	40654000	36530000	0	0	0	0	NA	NA	NA	NA	NA	NA	NA	NA	NA	NA	NA	NA	OTHER
206302	By MS/MS	By MS/MS	By MS/MS	By MS/MS	By MS/MS	By MS/MS	By MS/MS	By matching	By MS/MS	By MS/MS	By matching	By MS/MS	84782000	117060000	154880000	131160000	128180000	121360000	130310000	139950000	82667000	90296000	73202000	117710000	54586000	73074000	71423000	67295000	52001000	53560000	52989000	48256000	50664000	52555000	41396000	64881000	82508.K1W6M0	5.62e-70	226	COG2162@1|root,2S76B@2759|Eukaryota	2759|Eukaryota	Q	N-acetyltransferase	NA	NA	NA	NA	Acetyltransf_2	OTHER
206382	By MS/MS	By MS/MS	By MS/MS	By MS/MS	By MS/MS	By MS/MS	By MS/MS	By MS/MS	By MS/MS	By MS/MS	By MS/MS	By MS/MS	40540000	246470000	308140000	345730000	556670000	632910000	517570000	673280000	202930000	49986000	318810000	329760000	0	125300000	140880000	189420000	205370000	305410000	203880000	228840000	119680000	0	129750000	153630000	5217.XP_007002067.1	8.73e-68	208	COG0537@1|root,KOG3275@2759|Eukaryota,3A3J2@33154|Opisthokonta,3P2XN@4751|Fungi,3V1EK@5204|Basidiomycota,3VFHC@5234|Tremellales	4751|Fungi	T	HIT domain	HNT1	GO:0000166,GO:0003674,GO:0003824,GO:0005488,GO:0005575,GO:0005622,GO:0005623,GO:0005634,GO:0005737,GO:0006139,GO:0006725,GO:0006753,GO:0006793,GO:0006796,GO:0006807,GO:0008150,GO:0008152,GO:0009117,GO:0009987,GO:0016787,GO:0016810,GO:0016811,GO:0019637,GO:0034641,GO:0036094,GO:0043226,GO:0043227,GO:0043229,GO:0043231,GO:0043530,GO:0044237,GO:0044238,GO:0044281,GO:0044424,GO:0044464,GO:0046483,GO:…	ko:K01518	ko00230,ko00240,map00230,map00240	HIT	OTHER
206942	By MS/MS	By MS/MS	By MS/MS	By MS/MS	By MS/MS	By MS/MS	By MS/MS	By MS/MS	By MS/MS	By MS/MS	By MS/MS	By MS/MS	3456300000	3531000000	3810600000	3308000000	6914100000	6818500000	7745600000	6910100000	2572500000	2993900000	3678200000	3239000000	890660000	897320000	820800000	944010000	1090000000	1202300000	1119700000	1105400000	689890000	741500000	750530000	812670000	82508.K1VJ95	0	1060	COG1022@1|root,KOG1256@2759|Eukaryota,38BK9@33154|Opisthokonta,3NUAR@4751|Fungi,3UZGX@5204|Basidiomycota,3VE4G@5234|Tremellales	4751|Fungi	I	AMP-binding enzyme	FAA2	GO:0001676,GO:0003674,GO:0003824,GO:0004467,GO:0005575,GO:0005622,GO:0005623,GO:0005737,GO:0005739,GO:0005777,GO:0006082,GO:0006629,GO:0006631,GO:0008150,GO:0008152,GO:0009987,GO:0015645,GO:0016405,GO:0016874,GO:0016877,GO:0016878,GO:0019752,GO:0031956,GO:0031957,GO:0032787,GO:0042579,GO:0043226,GO:0043227,GO:0043229,GO:0043231,GO:0043436,GO:0044237,GO:0044238,GO:0044255,GO:0044281,GO:0044424,GO:…	ko:K01897	ko00061,ko00071,ko01100,ko01212,ko02024,ko03320,ko04146,ko04216,ko04714,ko04920,map00061,map00071,map01100,map01212,map02024,map03320,map04146,map04216,map04714,map04920	AMP-binding	OTHER
209172	By MS/MS	By MS/MS	By MS/MS	By MS/MS	By MS/MS	By MS/MS	By MS/MS	By MS/MS	By MS/MS	By MS/MS	By MS/MS	By MS/MS	3417000000	3477800000	5188200000	4645000000	7191500000	5604900000	6062900000	7012200000	5252300000	5002800000	5555400000	5317600000	520620000	499850000	646880000	635760000	550570000	459860000	581650000	495140000	588180000	582440000	527640000	584560000	552467.XP_003191551.1	0	1125	COG0699@1|root,KOG0446@2759|Eukaryota,38C4B@33154|Opisthokonta,3NU4R@4751|Fungi,3UZQK@5204|Basidiomycota,3VEET@5234|Tremellales	4751|Fungi	U	Belongs to the TRAFAC class dynamin-like GTPase superfamily. Dynamin Fzo YdjA family	VPS1	GO:0000266,GO:0000322,GO:0000323,GO:0000324,GO:0000329,GO:0003373,GO:0003374,GO:0003674,GO:0003774,GO:0003824,GO:0003924,GO:0005488,GO:0005515,GO:0005575,GO:0005622,GO:0005623,GO:0005737,GO:0005739,GO:0005740,GO:0005741,GO:0005768,GO:0005770,GO:0005773,GO:0005774,GO:0005777,GO:0005829,GO:0005856,GO:0005938,GO:0006605,GO:0006623,GO:0006810,GO:0006886,GO:0006897,GO:0006996,GO:0007005,GO:0007010,GO:…	ko:K17065	ko04139,ko04214,ko04217,ko04621,ko04668,map04139,map04214,map04217,map04621,map04668	Dynamin_M,Dynamin_N,GED	OTHER
210116	By matching	By matching	By MS/MS	By MS/MS	By matching	By matching	By MS/MS	By MS/MS	By MS/MS	By matching	By matching	By matching	71978000	54633000	60669000	105300000	64522000	19404000	62871000	95608000	70629000	44664000	90224000	47140000	0	0	0	54074000	0	0	0	21284000	0	0	0	0	82508.K1W0P2	9.57e-273	785	COG5265@1|root,KOG0056@2759|Eukaryota,38D03@33154|Opisthokonta,3NV8N@4751|Fungi,3UZ0R@5204|Basidiomycota,3VE5S@5234|Tremellales	4751|Fungi	Q	ABC transporter transmembrane region	hmt1	GO:0000041,GO:0000166,GO:0000322,GO:0000323,GO:0000324,GO:0000329,GO:0003674,GO:0003824,GO:0005215,GO:0005488,GO:0005524,GO:0005575,GO:0005622,GO:0005623,GO:0005737,GO:0005773,GO:0005774,GO:0006810,GO:0006811,GO:0006812,GO:0006820,GO:0006857,GO:0006950,GO:0007034,GO:0008144,GO:0008150,GO:0009636,GO:0009987,GO:0010035,GO:0010038,GO:0015399,GO:0015405,GO:0015440,GO:0015711,GO:0015833,GO:0016020,GO:…	ko:K05661	ko02010,map02010	ABC_membrane,ABC_tran	OTHER
211698	NA	NA	By matching	NA	By MS/MS	By MS/MS	By matching	By MS/MS	NA	NA	NA	NA	0	0	1966500	0	80351000	9989300	66593000	57852000	0	0	0	0	0	0	0	0	0	0	0	0	0	0	0	0	82508.K1WAJ7	5.62e-300	825	KOG1435@1|root,KOG1435@2759|Eukaryota,39J7B@33154|Opisthokonta,3NUCD@4751|Fungi,3UY5M@5204|Basidiomycota,3VCYM@5234|Tremellales	4751|Fungi	IT	Ergosterol biosynthesis ERG4/ERG24 family	ERG4	GO:0000246,GO:0003674,GO:0003824,GO:0005575,GO:0005622,GO:0005623,GO:0005737,GO:0005783,GO:0005789,GO:0006066,GO:0006629,GO:0006694,GO:0006696,GO:0008150,GO:0008152,GO:0008202,GO:0008204,GO:0008610,GO:0009058,GO:0009987,GO:0012505,GO:0016020,GO:0016021,GO:0016125,GO:0016126,GO:0016128,GO:0016129,GO:0016491,GO:0016627,GO:0016628,GO:0030176,GO:0031224,GO:0031227,GO:0031984,GO:0042175,GO:0043226,GO:…	ko:K00223	ko00100,ko01100,ko01130,map00100,map01100,map01130	ERG4_ERG24	OTHER
212933	By MS/MS	By MS/MS	By MS/MS	By MS/MS	By MS/MS	By MS/MS	By MS/MS	By MS/MS	By MS/MS	By MS/MS	By MS/MS	By MS/MS	716380000	724330000	675280000	826290000	449080000	619500000	681540000	857790000	537290000	740420000	737420000	886330000	273270000	268030000	242290000	294050000	195690000	211970000	182320000	194280000	201240000	257720000	215530000	266100000	5217.XP_007007218.1	3.57e-89	281	KOG2086@1|root,KOG2086@2759|Eukaryota,38GGJ@33154|Opisthokonta,3NW1D@4751|Fungi,3UY4V@5204|Basidiomycota,3VF7Y@5234|Tremellales	4751|Fungi	Y	Domain present in Saccharomyces cerevisiae Shp1, Drosophila melanogaster eyes closed gene (eyc), and vertebrate p47.	SHP1	GO:0000003,GO:0000045,GO:0000819,GO:0003006,GO:0003674,GO:0005488,GO:0005515,GO:0005575,GO:0005622,GO:0005623,GO:0005634,GO:0005737,GO:0005829,GO:0005975,GO:0005976,GO:0005977,GO:0006073,GO:0006091,GO:0006112,GO:0006508,GO:0006511,GO:0006807,GO:0006914,GO:0006950,GO:0006996,GO:0006997,GO:0006998,GO:0007030,GO:0007033,GO:0007049,GO:0007059,GO:0008150,GO:0008152,GO:0008608,GO:0009056,GO:0009057,GO:…	ko:K14012	ko04141,map04141	SEP,UBA_4,UBX	OTHER
213901	By MS/MS	By MS/MS	By MS/MS	By MS/MS	By MS/MS	By MS/MS	By MS/MS	By MS/MS	By MS/MS	By MS/MS	By MS/MS	By MS/MS	1311600000	1452500000	1938800000	1389000000	4131400000	2242200000	4155500000	5034800000	1472100000	1634400000	1644700000	1529700000	471800000	524880000	454830000	532200000	977220000	687630000	985380000	1013300000	481690000	521870000	475370000	600970000	5217.XP_007007849.1	6.51e-135	395	COG2130@1|root,KOG1196@2759|Eukaryota,39AU4@33154|Opisthokonta,3NUYM@4751|Fungi,3V06J@5204|Basidiomycota,3VFET@5234|Tremellales	4751|Fungi	S	N-terminal domain of oxidoreductase	NA	NA	ko:K07119	NA	ADH_N_2,ADH_zinc_N	OTHER
214217	By matching	By matching	By matching	By matching	By MS/MS	By MS/MS	By matching	By MS/MS	NA	NA	By matching	NA	9358000	9379800	15862000	8287300	25910000	26388000	30995000	34997000	0	0	14540000	0	0	0	0	0	0	0	0	0	0	0	0	0	5207.AAW41122	4.17e-124	362	COG1094@1|root,KOG3273@2759|Eukaryota,38CB6@33154|Opisthokonta,3NTY8@4751|Fungi,3UZRM@5204|Basidiomycota,3VDRF@5234|Tremellales	4751|Fungi	O	K homology RNA-binding domain	PNO1	GO:0000447,GO:0000460,GO:0000462,GO:0000466,GO:0000469,GO:0000472,GO:0000478,GO:0000479,GO:0000966,GO:0000967,GO:0003674,GO:0003676,GO:0003723,GO:0005488,GO:0005515,GO:0005575,GO:0005622,GO:0005623,GO:0005634,GO:0005730,GO:0006139,GO:0006364,GO:0006396,GO:0006725,GO:0006807,GO:0008150,GO:0008152,GO:0009987,GO:0010467,GO:0016043,GO:0016070,GO:0016072,GO:0022607,GO:0022613,GO:0030490,GO:0030684,GO:…	ko:K11884	NA	-	OTHER
215082	By MS/MS	By MS/MS	By MS/MS	By MS/MS	By MS/MS	By MS/MS	By MS/MS	By MS/MS	By MS/MS	By matching	By MS/MS	By MS/MS	768040000	766910000	719690000	542650000	621110000	729420000	906150000	1546300000	764690000	1049500000	1186300000	1586100000	679540000	687580000	0	667960000	0	0	0	0	0	0	685810000	0	552467.XP_003195756.1	2.51e-253	738	COG5117@1|root,KOG2153@2759|Eukaryota,38C9J@33154|Opisthokonta,3NV3V@4751|Fungi,3UZ9S@5204|Basidiomycota,3VDQB@5234|Tremellales	4751|Fungi	JU	CBF/Mak21 family	NA	GO:0003674,GO:0003682,GO:0005488,GO:0005575,GO:0005622,GO:0005623,GO:0005634,GO:0005654,GO:0005656,GO:0005730,GO:0006139,GO:0006259,GO:0006260,GO:0006261,GO:0006267,GO:0006270,GO:0006364,GO:0006396,GO:0006725,GO:0006807,GO:0007049,GO:0008150,GO:0008152,GO:0009058,GO:0009059,GO:0009987,GO:0010467,GO:0016043,GO:0016070,GO:0016072,GO:0022402,GO:0022607,GO:0022613,GO:0030684,GO:0030687,GO:0030689,GO:…	ko:K14834	NA	CBF,NOC3p	OTHER
215433	By matching	NA	By matching	By matching	By MS/MS	By MS/MS	By MS/MS	By MS/MS	NA	NA	NA	By matching	16731000	0	11146000	11017000	111090000	56103000	87087000	78850000	0	0	0	21989000	0	0	0	0	0	0	0	0	0	0	0	0	82508.K1V5J2	2.6e-43	148	2E212@1|root,2S9A3@2759|Eukaryota,3AAMS@33154|Opisthokonta,3P8CE@4751|Fungi,3V2MK@5204|Basidiomycota,3VFZR@5234|Tremellales	4751|Fungi	-	-	NA	NA	ko:K11877	NA	PAC3	OTHER
215761	NA	NA	By matching	NA	By matching	By matching	NA	By MS/MS	NA	NA	By matching	By matching	0	0	24144000	0	28346000	33562000	0	43541000	0	0	24775000	31059000	0	0	0	0	0	0	0	0	0	0	0	0	82508.K1WCL7	6.93e-116	356	KOG2935@1|root,KOG2935@2759|Eukaryota,38FCI@33154|Opisthokonta,3P453@4751|Fungi,3V1C6@5204|Basidiomycota,3VD8W@5234|Tremellales	4751|Fungi	O	Josephin	NA	NA	ko:K11863	ko04141,map04141	Josephin,UIM	OTHER
217302	By MS/MS	By MS/MS	By MS/MS	By MS/MS	By MS/MS	By MS/MS	By MS/MS	By MS/MS	By MS/MS	By MS/MS	By MS/MS	By MS/MS	634920000	611910000	657680000	489100000	550570000	495460000	614200000	554050000	572380000	760550000	781270000	810540000	320590000	271000000	319420000	280360000	171020000	178650000	184690000	164900000	332370000	348030000	303100000	366660000	552467.XP_003195709.1	2.24e-60	188	KOG3300@1|root,KOG3300@2759|Eukaryota,3A3JT@33154|Opisthokonta,3P3YN@4751|Fungi,3V1HA@5204|Basidiomycota,3VFCZ@5234|Tremellales	4751|Fungi	CD	GRIM-19 protein	NA	NA	ko:K11353	ko00190,ko01100,ko04714,ko04723,ko04932,ko05010,ko05012,ko05016,map00190,map01100,map04714,map04723,map04932,map05010,map05012,map05016	GRIM-19	OTHER
218039	By MS/MS	By MS/MS	By MS/MS	By MS/MS	By MS/MS	By MS/MS	By MS/MS	By MS/MS	By MS/MS	By matching	By MS/MS	By MS/MS	104800000	133870000	253940000	200620000	494490000	453270000	436270000	505250000	83367000	153820000	173410000	171690000	67562000	68834000	70999000	74723000	92968000	74058000	83067000	104050000	0	56915000	65508000	55846000	5207.AAW46802	0	897	COG5329@1|root,KOG1889@2759|Eukaryota,38DI4@33154|Opisthokonta,3NUMD@4751|Fungi,3UYH6@5204|Basidiomycota,3VEAT@5234|Tremellales	4751|Fungi	I	SacI homology domain	SAC1	GO:0000139,GO:0002178,GO:0003674,GO:0003824,GO:0004438,GO:0005575,GO:0005622,GO:0005623,GO:0005737,GO:0005739,GO:0005740,GO:0005741,GO:0005783,GO:0005789,GO:0005794,GO:0005795,GO:0005797,GO:0005938,GO:0006629,GO:0006644,GO:0006650,GO:0006661,GO:0006793,GO:0006796,GO:0008150,GO:0008152,GO:0008610,GO:0008654,GO:0009058,GO:0009987,GO:0012505,GO:0016020,GO:0016021,GO:0016311,GO:0016787,GO:0016788,GO:…	ko:K21797	ko00562,ko01100,ko04070,map00562,map01100,map04070	Syja_N	OTHER
220129	NA	By matching	By matching	By matching	By MS/MS	By matching	By MS/MS	By MS/MS	By matching	NA	NA	By matching	0	14828000	14310000	11178000	77402000	79545000	70280000	140510000	5290100	0	0	14531000	0	0	0	0	0	0	0	0	0	0	0	0	5207.AAW41770	1.81e-38	128	COG1644@1|root,KOG3497@2759|Eukaryota,3A8D3@33154|Opisthokonta,3P6YC@4751|Fungi,3V2FX@5204|Basidiomycota,3VH6W@5234|Tremellales	4751|Fungi	K	RNA polymerases N / 8 kDa subunit	RPB10	GO:0000428,GO:0003674,GO:0005488,GO:0005575,GO:0005622,GO:0005623,GO:0005634,GO:0005654,GO:0005665,GO:0005666,GO:0005730,GO:0005736,GO:0006139,GO:0006351,GO:0006360,GO:0006366,GO:0006383,GO:0006399,GO:0006725,GO:0006807,GO:0008150,GO:0008152,GO:0008270,GO:0009058,GO:0009059,GO:0009304,GO:0009987,GO:0010467,GO:0016070,GO:0016591,GO:0018130,GO:0019438,GO:0030880,GO:0031974,GO:0031981,GO:0032774,GO:…	ko:K03007	ko00230,ko00240,ko01100,ko03020,ko04623,ko05016,ko05169,map00230,map00240,map01100,map03020,map04623,map05016,map05169	RNA_pol_N	OTHER
222522	By MS/MS	By MS/MS	By MS/MS	By MS/MS	By MS/MS	By MS/MS	By MS/MS	By MS/MS	By matching	By matching	By matching	NA	3952900000	3673200000	4362900000	4207300000	1613300000	1138300000	1394100000	1372400000	36315000	30115000	11564000	0	1123300000	880520000	490500000	541600000	122210000	132140000	121540000	220890000	14770000	12173000	0	0	397278.JOJN01000002_gene715	1.63999999998029e-313	868	COG0654@1|root,COG0654@2|Bacteria,2GKUZ@201174|Actinobacteria,4DPJP@85009|Propionibacteriales	201174|Actinobacteria	CH	FAD binding domain	NA	NA	ko:K10676	ko00361,ko01100,ko01120,ko01220,map00361,map01100,map01120,map01220	FAD_binding_3	OTHER
222630	By MS/MS	By MS/MS	By MS/MS	By MS/MS	By MS/MS	By MS/MS	By MS/MS	By MS/MS	By MS/MS	By MS/MS	By matching	By MS/MS	134610000	123970000	0	91112000	1431400000	1292100000	1338300000	1942900000	144680000	181350000	129050000	207920000	74927000	74492000	0	0	630690000	544620000	622450000	408540000	76230000	86732000	0	118870000	82508.K1WP75	4.48e-114	348	COG5398@1|root,KOG4480@2759|Eukaryota,39R8U@33154|Opisthokonta,3P6J3@4751|Fungi,3V1X8@5204|Basidiomycota,3VEUX@5234|Tremellales	4751|Fungi	P	Heme oxygenase	NA	NA	ko:K21480	ko00860,ko01100,ko01110,map00860,map01100,map01110	Heme_oxygenase	OTHER
222904	By MS/MS	By MS/MS	By MS/MS	By MS/MS	By MS/MS	By MS/MS	By MS/MS	By MS/MS	By MS/MS	By MS/MS	By MS/MS	By MS/MS	203020000	190370000	277400000	162990000	323590000	134350000	263820000	246250000	177200000	224780000	220120000	240640000	72605000	66089000	65654000	64585000	62710000	74743000	41622000	42052000	66696000	89903000	81539000	63392000	5207.AAW42300	1.08e-109	330	COG1028@1|root,KOG0725@2759|Eukaryota,39W2U@33154|Opisthokonta,3P0G5@4751|Fungi,3V384@5204|Basidiomycota,3VGH3@5234|Tremellales	4751|Fungi	Q	Enoyl-(Acyl carrier protein) reductase	NA	NA	NA	NA	adh_short,adh_short_C2	OTHER
223678	By MS/MS	By MS/MS	By MS/MS	By MS/MS	By MS/MS	By MS/MS	By MS/MS	By MS/MS	By MS/MS	By MS/MS	By MS/MS	By MS/MS	47311000000	65749000000	74352000000	72207000000	26308000000	25223000000	24148000000	32386000000	86047000000	85542000000	101640000000	88504000000	6064600000	8203500000	8561000000	9597500000	3203200000	3806300000	2782200000	3896600000	9703400000	8765100000	10591000000	10609000000	NA	NA	NA	NA	NA	NA	NA	NA	NA	NA	NA	NA	OTHER
224114	By MS/MS	By MS/MS	By MS/MS	By MS/MS	By MS/MS	By MS/MS	By MS/MS	By MS/MS	By MS/MS	By MS/MS	By MS/MS	By MS/MS	99172000	71706000	95949000	60320000	158850000	109530000	163010000	177270000	93885000	89516000	96892000	107250000	0	0	0	0	0	0	0	0	0	0	0	0	82508.K1VLZ8	4.73e-62	201	COG3714@1|root,2S96P@2759|Eukaryota,3AD54@33154|Opisthokonta	33154|Opisthokonta	S	YhhN family	NA	NA	NA	NA	YhhN	OTHER
225390	By MS/MS	By MS/MS	By MS/MS	By MS/MS	By MS/MS	By MS/MS	By MS/MS	By MS/MS	By MS/MS	By MS/MS	By MS/MS	By MS/MS	137380000	72850000	125630000	126680000	134590000	114890000	131260000	106100000	227380000	194810000	161320000	334210000	101290000	0	0	0	87334000	65138000	86823000	0	118310000	114180000	0	143650000	5217.XP_007007705.1	3.85e-237	660	COG0476@1|root,KOG2015@2759|Eukaryota,38CTC@33154|Opisthokonta,3NU43@4751|Fungi,3UY4Y@5204|Basidiomycota,3VE6F@5234|Tremellales	4751|Fungi	O	E2_bind	uba3	GO:0003674,GO:0003824,GO:0005575,GO:0005622,GO:0005623,GO:0005737,GO:0006464,GO:0006807,GO:0008150,GO:0008152,GO:0008641,GO:0009987,GO:0016874,GO:0016877,GO:0019538,GO:0019781,GO:0032446,GO:0036211,GO:0043170,GO:0043412,GO:0044237,GO:0044238,GO:0044260,GO:0044267,GO:0044424,GO:0044464,GO:0045116,GO:0070647,GO:0071704,GO:1901564	ko:K10686	ko04120,map04120	E2_bind,ThiF	OTHER
226137	By MS/MS	By MS/MS	By MS/MS	By MS/MS	By MS/MS	By MS/MS	By MS/MS	By MS/MS	By MS/MS	By MS/MS	By MS/MS	By MS/MS	190450000	387380000	419570000	290680000	68556000	93755000	55825000	65286000	252450000	330240000	318430000	405440000	135420000	142100000	135900000	151970000	0	89113000	0	0	150930000	164650000	152980000	133500000	82508.K1VPD3	6.89e-56	183	2E2G7@1|root,2S9PZ@2759|Eukaryota,3A8VX@33154|Opisthokonta,3P7GU@4751|Fungi,3V2PN@5204|Basidiomycota,3VFTI@5234|Tremellales	4751|Fungi	-	-	NA	NA	NA	NA	-	OTHER
227140	By MS/MS	By MS/MS	By MS/MS	By MS/MS	By MS/MS	By MS/MS	By matching	By matching	By MS/MS	By MS/MS	By MS/MS	By MS/MS	72083000	11614000	185040000	82003000	165660000	121650000	96454000	86434000	202760000	254950000	271860000	152920000	31111000	15256000	82020000	96969000	75782000	37237000	56444000	48144000	104470000	115840000	78913000	62316000	NA	NA	NA	NA	NA	NA	NA	NA	NA	NA	NA	NA	OTHER
228442	By MS/MS	By MS/MS	By MS/MS	By MS/MS	By MS/MS	By MS/MS	By MS/MS	By MS/MS	By MS/MS	By MS/MS	By MS/MS	By MS/MS	334760000	539600000	581290000	354660000	1070200000	635400000	925390000	1091600000	544610000	705400000	508140000	607790000	268870000	193460000	410490000	264490000	533990000	229680000	479050000	423450000	343080000	379600000	308700000	362800000	5217.XP_007006967.1	6.83e-63	194	COG1436@1|root,KOG3432@2759|Eukaryota,3A3I9@33154|Opisthokonta,3P3TN@4751|Fungi,3V15X@5204|Basidiomycota,3VFUY@5234|Tremellales	4751|Fungi	C	ATP synthase (F/14-kDa) subunit	VMA7	GO:0000221,GO:0000322,GO:0000323,GO:0000324,GO:0000329,GO:0003674,GO:0003824,GO:0005215,GO:0005575,GO:0005622,GO:0005623,GO:0005737,GO:0005773,GO:0005774,GO:0006810,GO:0006811,GO:0006812,GO:0006873,GO:0006885,GO:0007035,GO:0008150,GO:0008324,GO:0009987,GO:0015075,GO:0015077,GO:0015078,GO:0015318,GO:0015399,GO:0015405,GO:0015672,GO:0015988,GO:0015991,GO:0016020,GO:0016021,GO:0016462,GO:0016469,GO:…	ko:K02151	ko00190,ko01100,ko04145,ko04150,ko04721,ko04966,ko05110,ko05120,ko05323,map00190,map01100,map04145,map04150,map04721,map04966,map05110,map05120,map05323	ATP-synt_F	OTHER
232893	By MS/MS	By MS/MS	By MS/MS	By MS/MS	By MS/MS	By MS/MS	By MS/MS	By MS/MS	By MS/MS	By MS/MS	By MS/MS	By MS/MS	18819000000	20189000000	20979000000	19608000000	42800000000	34573000000	40056000000	45742000000	20096000000	22288000000	23231000000	23212000000	1338200000	1525500000	1410700000	1434000000	1867100000	2039900000	1875300000	1908400000	1452700000	1460500000	1373400000	1488500000	82508.K1WMM4	0	3920	COG0331@1|root,2QQJX@2759|Eukaryota,38EJX@33154|Opisthokonta,3NV76@4751|Fungi,3UXU7@5204|Basidiomycota,3VEAI@5234|Tremellales	4751|Fungi	I	Acyl transferase domain	NA	GO:0001676,GO:0003674,GO:0003824,GO:0004312,GO:0004314,GO:0004315,GO:0004316,GO:0005575,GO:0005622,GO:0005623,GO:0005737,GO:0005829,GO:0005835,GO:0006082,GO:0006629,GO:0006631,GO:0006633,GO:0008150,GO:0008152,GO:0008610,GO:0008897,GO:0009058,GO:0009987,GO:0016053,GO:0016417,GO:0016419,GO:0016420,GO:0016491,GO:0016614,GO:0016616,GO:0016740,GO:0016746,GO:0016747,GO:0016772,GO:0016780,GO:0019752,GO:…	ko:K00667,ko:K00668	ko00061,ko01100,ko01212,map00061,map01100,map01212	ACPS,Acyl_transf_1,DUF1729,Ketoacyl-synt_C,MaoC_dehydrat_N,MaoC_dehydratas,SAT,adh_short,ketoacyl-synt	OTHER
233545	By MS/MS	By MS/MS	By MS/MS	By MS/MS	By MS/MS	By MS/MS	By MS/MS	By MS/MS	By MS/MS	By MS/MS	By MS/MS	By MS/MS	2779700000	2941800000	3470700000	2299600000	1376600000	1303400000	1466800000	1763200000	1012800000	1249500000	1251900000	1081900000	820400000	894680000	915590000	787790000	408460000	417480000	408500000	501680000	326270000	337780000	322720000	359550000	82508.K1VZX5	0	899	COG2030@1|root,KOG1206@2759|Eukaryota,38D3K@33154|Opisthokonta,3NV6Q@4751|Fungi,3UZIA@5204|Basidiomycota,3VEN5@5234|Tremellales	4751|Fungi	Q	MaoC like domain	NA	NA	ko:K14729	NA	MaoC_dehydrat_N,MaoC_dehydratas,SCP2,adh_short	OTHER
233667	NA	NA	NA	NA	By MS/MS	By MS/MS	By matching	By matching	NA	NA	NA	NA	0	0	0	0	715250000	433540000	668530000	532110000	0	0	0	0	0	0	0	0	0	0	0	0	0	0	0	0	NA	NA	NA	NA	NA	NA	NA	NA	NA	NA	NA	NA	OTHER
233751	By matching	By matching	By MS/MS	By MS/MS	By MS/MS	By matching	By matching	NA	By MS/MS	NA	NA	NA	72437000	10210000	62737000	60336000	63752000	50719000	48903000	0	72584000	0	0	0	0	0	0	0	0	0	0	0	0	0	0	0	82508.K1VFH6	9.4e-295	870	COG5079@1|root,KOG1860@2759|Eukaryota,38FKX@33154|Opisthokonta,3NY7Y@4751|Fungi,3UZIJ@5204|Basidiomycota,3VCYT@5234|Tremellales	4751|Fungi	DU	SAC3/GANP family	SAC3	GO:0000278,GO:0000956,GO:0000972,GO:0000973,GO:0003674,GO:0005488,GO:0005515,GO:0005575,GO:0005622,GO:0005623,GO:0005634,GO:0005635,GO:0005643,GO:0006139,GO:0006259,GO:0006281,GO:0006283,GO:0006289,GO:0006396,GO:0006397,GO:0006401,GO:0006402,GO:0006403,GO:0006405,GO:0006406,GO:0006611,GO:0006725,GO:0006807,GO:0006810,GO:0006886,GO:0006913,GO:0006950,GO:0006974,GO:0006996,GO:0007049,GO:0008104,GO:…	NA	NA	SAC3,SAC3_GANP	OTHER
237718	By MS/MS	By MS/MS	By MS/MS	By MS/MS	By MS/MS	By MS/MS	By MS/MS	By MS/MS	By MS/MS	By MS/MS	By MS/MS	By MS/MS	577980000	674050000	632960000	512240000	194010000	156620000	244410000	243250000	490340000	576320000	537840000	562070000	209950000	212270000	204930000	186270000	57994000	60948000	53983000	55245000	156660000	153990000	140880000	162840000	82508.K1VH25	2.04e-133	392	COG2837@1|root,2S0NI@2759|Eukaryota,39VTW@33154|Opisthokonta,3NYSI@4751|Fungi	4751|Fungi	E	peroxidase	NA	NA	ko:K07223	NA	Dyp_perox	OTHER
237785	By MS/MS	By MS/MS	By MS/MS	By MS/MS	By matching	NA	By MS/MS	By MS/MS	By MS/MS	By MS/MS	By MS/MS	By MS/MS	202520000	202180000	219570000	180690000	10298000	0	29899000	54346000	125580000	111600000	207870000	107560000	110530000	107250000	104820000	101000000	0	0	0	57936000	64605000	0	81435000	65554000	5286.M7X3W3	2.55e-163	483	COG0154@1|root,KOG1212@2759|Eukaryota,38CWX@33154|Opisthokonta,3NTYP@4751|Fungi,3V04C@5204|Basidiomycota	4751|Fungi	IJT	General amidase	NA	NA	ko:K01426	ko00330,ko00360,ko00380,ko00627,ko00643,ko01120,map00330,map00360,map00380,map00627,map00643,map01120	Amidase	OTHER
239639	By MS/MS	By MS/MS	By MS/MS	By MS/MS	By MS/MS	By MS/MS	By MS/MS	By MS/MS	By MS/MS	By MS/MS	By MS/MS	By MS/MS	714990000	577560000	656330000	667740000	951900000	784080000	892330000	807440000	576560000	471560000	751400000	528820000	281470000	241000000	263210000	308720000	217370000	321880000	256470000	207820000	220130000	219770000	211700000	224560000	82508.K1VHX7	0	1053	KOG2085@1|root,KOG2085@2759|Eukaryota,38CH2@33154|Opisthokonta,3NTWN@4751|Fungi,3UYWK@5204|Basidiomycota,3VE1M@5234|Tremellales	4751|Fungi	T	The B regulatory subunit might modulate substrate selectivity and catalytic activity, and also might direct the localization of the catalytic enzyme to a particular subcellular compartment	RTS1	GO:0000003,GO:0000075,GO:0000159,GO:0000228,GO:0000278,GO:0000280,GO:0000281,GO:0000775,GO:0000776,GO:0000779,GO:0000780,GO:0000793,GO:0000794,GO:0000819,GO:0000910,GO:0001100,GO:0003674,GO:0005575,GO:0005622,GO:0005623,GO:0005634,GO:0005694,GO:0005737,GO:0005815,GO:0005816,GO:0005819,GO:0005826,GO:0005856,GO:0005933,GO:0005935,GO:0005938,GO:0006464,GO:0006470,GO:0006793,GO:0006796,GO:0006807,GO:…	ko:K11584	ko03015,ko04071,ko04113,ko04114,ko04151,ko04152,ko04261,ko04728,ko05165,map03015,map04071,map04113,map04114,map04151,map04152,map04261,map04728,map05165	B56	OTHER
240233	By MS/MS	By MS/MS	By MS/MS	By MS/MS	By MS/MS	By MS/MS	By MS/MS	By MS/MS	By MS/MS	By MS/MS	By MS/MS	By MS/MS	298660000	311640000	365160000	181240000	389000000	213990000	246780000	268550000	262740000	356950000	308010000	326720000	171230000	175270000	217330000	0	127890000	74676000	84563000	67531000	161090000	178840000	159220000	145370000	552467.XP_003191225.1	2.64e-61	201	COG0233@1|root,KOG4759@2759|Eukaryota,3A7S9@33154|Opisthokonta,3P539@4751|Fungi,3V1VX@5204|Basidiomycota,3VFFQ@5234|Tremellales	4751|Fungi	J	Ribosome recycling factor	NA	NA	ko:K02838	NA	RRF	OTHER
240251	By MS/MS	By MS/MS	By MS/MS	By MS/MS	By MS/MS	By MS/MS	By MS/MS	By MS/MS	By MS/MS	By MS/MS	By MS/MS	By MS/MS	73866000	81930000	85256000	90643000	164040000	116780000	201480000	183760000	90540000	140820000	140990000	117770000	46495000	41482000	46508000	47239000	60068000	53857000	60694000	57159000	53975000	54132000	58061000	57563000	5207.AAW44554	2.48e-70	222	KOG0226@1|root,KOG0226@2759|Eukaryota,38DU1@33154|Opisthokonta,3NV9Q@4751|Fungi,3V10K@5204|Basidiomycota,3VGAR@5234|Tremellales	4751|Fungi	A	RNA recognition motif	NA	GO:0000375,GO:0000377,GO:0000398,GO:0003674,GO:0003676,GO:0003723,GO:0005488,GO:0006139,GO:0006396,GO:0006397,GO:0006725,GO:0006807,GO:0008150,GO:0008152,GO:0008380,GO:0009987,GO:0010467,GO:0016070,GO:0016071,GO:0034641,GO:0043170,GO:0044237,GO:0044238,GO:0045292,GO:0046483,GO:0071704,GO:0090304,GO:0097159,GO:1901360,GO:1901363	NA	NA	RRM_1	OTHER
241507	By matching	By matching	By MS/MS	By MS/MS	By MS/MS	By MS/MS	By MS/MS	By MS/MS	By MS/MS	By MS/MS	By MS/MS	By MS/MS	32843000	39783000	114880000	100520000	136830000	43627000	142600000	133900000	104950000	116260000	96529000	81581000	0	25631000	48514000	47749000	47844000	19037000	64260000	43104000	51430000	52359000	52264000	52048000	82508.K1VT44	0	1109	KOG4269@1|root,KOG4269@2759|Eukaryota,38FSR@33154|Opisthokonta,3NVRI@4751|Fungi,3UXTA@5204|Basidiomycota,3VDXQ@5234|Tremellales	4751|Fungi	T	GTPase-activator protein for Rho-like GTPases	BEM3	GO:0000131,GO:0003674,GO:0005096,GO:0005488,GO:0005543,GO:0005575,GO:0005622,GO:0005623,GO:0005737,GO:0005826,GO:0005856,GO:0005933,GO:0005934,GO:0005937,GO:0005938,GO:0006996,GO:0007010,GO:0007163,GO:0008047,GO:0008150,GO:0008289,GO:0009966,GO:0009968,GO:0009987,GO:0010646,GO:0010648,GO:0015629,GO:0016043,GO:0023051,GO:0023057,GO:0030010,GO:0030234,GO:0030427,GO:0030695,GO:0030863,GO:0030864,GO:…	ko:K08773,ko:K19840	ko04011,ko04014,ko05200,ko05212,map04011,map04014,map05200,map05212	PH,PX,RhoGAP	OTHER
243652	By matching	By MS/MS	By MS/MS	By matching	By MS/MS	By MS/MS	By MS/MS	By MS/MS	By matching	By MS/MS	By MS/MS	By MS/MS	16775000	31955000	76573000	71935000	210390000	114080000	200480000	191930000	53253000	72203000	73746000	31075000	0	30555000	29921000	32535000	60098000	37773000	42342000	38346000	0	0	30981000	27897000	82508.K1VER1	0	1237	COG3300@1|root,2R57D@2759|Eukaryota,38CVH@33154|Opisthokonta,3NV2Y@4751|Fungi,3UZVG@5204|Basidiomycota,3VDCJ@5234|Tremellales	4751|Fungi	T	Bacterial signalling protein N terminal repeat	NA	NA	NA	NA	MHYT	OTHER
244437	By MS/MS	By MS/MS	By MS/MS	By MS/MS	By MS/MS	By MS/MS	By MS/MS	By MS/MS	By MS/MS	By MS/MS	By MS/MS	By MS/MS	665400000	588240000	596710000	540980000	1120800000	1066700000	1006700000	1563000000	413090000	489010000	510260000	414690000	250050000	269950000	227580000	249010000	293940000	285730000	318310000	339150000	197200000	192640000	174640000	190360000	82508.K1WD12	2.42e-158	453	COG0604@1|root,KOG1198@2759|Eukaryota,38HM9@33154|Opisthokonta,3NUIP@4751|Fungi,3UZU7@5204|Basidiomycota,3VGVD@5234|Tremellales	4751|Fungi	C	Zinc-binding dehydrogenase	NA	NA	ko:K00344	NA	ADH_N,ADH_zinc_N	OTHER
245163	By MS/MS	By MS/MS	By MS/MS	By MS/MS	By MS/MS	By MS/MS	By MS/MS	By MS/MS	By MS/MS	By MS/MS	By MS/MS	By MS/MS	2596200000	2284800000	2378100000	2551500000	4849200000	2938100000	3335500000	4863100000	2314000000	2705900000	3793100000	2551700000	670500000	651720000	628200000	562400000	793510000	1251300000	598290000	741450000	622460000	628800000	691270000	626280000	82508.K1VS49	5.24e-265	730	COG1448@1|root,KOG1411@2759|Eukaryota,38ED5@33154|Opisthokonta,3NU8Q@4751|Fungi,3UZ3P@5204|Basidiomycota,3VDX6@5234|Tremellales	4751|Fungi	E	Aminotransferase class I and II	AAT1	GO:0000096,GO:0001300,GO:0001302,GO:0003674,GO:0003824,GO:0004069,GO:0005575,GO:0005622,GO:0005623,GO:0005737,GO:0005739,GO:0005759,GO:0006082,GO:0006103,GO:0006107,GO:0006520,GO:0006528,GO:0006529,GO:0006530,GO:0006531,GO:0006532,GO:0006533,GO:0006534,GO:0006536,GO:0006538,GO:0006790,GO:0006807,GO:0007568,GO:0007569,GO:0008150,GO:0008152,GO:0008483,GO:0008652,GO:0009056,GO:0009058,GO:0009063,GO:…	ko:K14455	ko00220,ko00250,ko00270,ko00330,ko00350,ko00360,ko00400,ko00710,ko00950,ko00960,ko01100,ko01110,ko01120,ko01130,ko01200,ko01210,ko01230,ko04975,map00220,map00250,map00270,map00330,map00350,map00360,map00400,map00710,map00950,map00960,map01100,map01110,map01120,map01130,map01200,map01210,map01230,map04975	Aminotran_1_2	OTHER
245176	By MS/MS	By MS/MS	By MS/MS	By MS/MS	By MS/MS	By matching	By MS/MS	By matching	By MS/MS	By MS/MS	By matching	By matching	384130000	462720000	253720000	420860000	930710000	528290000	746740000	671610000	214630000	273510000	225100000	190710000	189230000	211190000	216100000	273150000	330010000	211380000	228110000	190830000	214680000	203220000	194420000	167260000	82508.K1VZX0	1.44e-99	304	KOG2629@1|root,KOG2629@2759|Eukaryota,38HJ0@33154|Opisthokonta,3NZWU@4751|Fungi,3V11R@5204|Basidiomycota,3VEXP@5234|Tremellales	4751|Fungi	MOU	Peroxisomal membrane anchor protein (Pex14p) conserved region	PEX14	GO:0003674,GO:0005102,GO:0005488,GO:0005515,GO:0005575,GO:0005622,GO:0005623,GO:0005737,GO:0005777,GO:0005778,GO:0006605,GO:0006625,GO:0006810,GO:0006886,GO:0006996,GO:0007031,GO:0008104,GO:0008150,GO:0009987,GO:0015031,GO:0015833,GO:0015919,GO:0016020,GO:0016043,GO:0016558,GO:0016560,GO:0017038,GO:0030674,GO:0031090,GO:0031903,GO:0032991,GO:0033036,GO:0033365,GO:0034613,GO:0042579,GO:0042886,GO:…	ko:K13343	ko04146,map04146	Pex14_N	OTHER
245948	By MS/MS	By matching	By MS/MS	By matching	By MS/MS	By MS/MS	By MS/MS	By MS/MS	By MS/MS	By MS/MS	By MS/MS	By MS/MS	87415000	73496000	105370000	76364000	43965000	101700000	38963000	122520000	100860000	95535000	101240000	114310000	0	0	0	0	0	88710000	0	0	0	0	0	67770000	552467.XP_003195615.1	1.02e-155	448	COG0500@1|root,KOG2940@2759|Eukaryota,38S4I@33154|Opisthokonta,3NUGI@4751|Fungi,3UYK6@5204|Basidiomycota,3VFA7@5234|Tremellales	4751|Fungi	Q	s-adenosyl-l-methionine-dependent methyltransferase	NA	NA	ko:K18162	ko04714,map04714	Methyltransf_11,Methyltransf_23	OTHER
246515	By MS/MS	By MS/MS	By matching	By matching	By MS/MS	By MS/MS	By MS/MS	By MS/MS	By matching	By matching	By matching	By matching	101480000	96564000	102980000	104940000	250300000	156320000	208830000	245390000	72407000	93790000	139620000	108760000	64402000	86701000	59976000	68868000	153000000	125930000	121830000	95992000	0	58326000	78100000	68076000	82508.K1VCX5	5.28e-169	499	28J35@1|root,2QRF7@2759|Eukaryota,38EMQ@33154|Opisthokonta,3NY1T@4751|Fungi,3UYCD@5204|Basidiomycota,3VDDH@5234|Tremellales	4751|Fungi	L	Chitin biosynthesis protein CHS5 N-terminus	NA	GO:0000003,GO:0000746,GO:0000747,GO:0005575,GO:0005622,GO:0005623,GO:0005737,GO:0005768,GO:0005769,GO:0005794,GO:0005798,GO:0005802,GO:0006139,GO:0006259,GO:0006260,GO:0006261,GO:0006270,GO:0006725,GO:0006807,GO:0006810,GO:0006892,GO:0006893,GO:0006895,GO:0006896,GO:0007034,GO:0008150,GO:0008152,GO:0009058,GO:0009059,GO:0009987,GO:0012505,GO:0016192,GO:0016482,GO:0019953,GO:0022414,GO:0030133,GO:…	ko:K19877	NA	BRCT,CHS5_N,PTCB-BRCT,fn3_2	OTHER
248516	By MS/MS	By MS/MS	By MS/MS	By MS/MS	By MS/MS	By MS/MS	By MS/MS	By MS/MS	By MS/MS	By MS/MS	By MS/MS	By MS/MS	2897200000	3476000000	2494300000	2264900000	5419600000	3057700000	4399700000	4182300000	2774400000	2950900000	2868100000	2574600000	621610000	622130000	676250000	599410000	914430000	754960000	794500000	680160000	562900000	547090000	606490000	595540000	82508.K1VTC1	4.94e-205	573	COG0142@1|root,KOG0711@2759|Eukaryota,38DEA@33154|Opisthokonta,3NXTX@4751|Fungi,3UY20@5204|Basidiomycota,3VDRB@5234|Tremellales	4751|Fungi	H	Belongs to the FPP GGPP synthase family	ERG20	GO:0003674,GO:0003824,GO:0004161,GO:0004337,GO:0004659,GO:0005575,GO:0005622,GO:0005623,GO:0005737,GO:0005783,GO:0006066,GO:0006629,GO:0006644,GO:0006694,GO:0006696,GO:0006720,GO:0006721,GO:0006793,GO:0006796,GO:0008150,GO:0008152,GO:0008202,GO:0008204,GO:0008299,GO:0008610,GO:0008654,GO:0009058,GO:0009987,GO:0012505,GO:0016114,GO:0016125,GO:0016126,GO:0016128,GO:0016129,GO:0016740,GO:0016765,GO:…	ko:K00787	ko00900,ko01100,ko01110,ko01130,ko05164,ko05166,map00900,map01100,map01110,map01130,map05164,map05166	polyprenyl_synt	OTHER
249926	By MS/MS	By MS/MS	By MS/MS	By MS/MS	By MS/MS	By MS/MS	By MS/MS	By MS/MS	By MS/MS	By MS/MS	By MS/MS	By MS/MS	458730000	547000000	370190000	301480000	2541400000	2503300000	2276800000	1880500000	862020000	958380000	693960000	710330000	193720000	249490000	187930000	209460000	437160000	375190000	383770000	393870000	333810000	356730000	297820000	359630000	82508.K1VY97	1.61e-88	272	KOG0379@1|root,KOG0379@2759|Eukaryota,39S97@33154|Opisthokonta,3NXQV@4751|Fungi,3V18V@5204|Basidiomycota	4751|Fungi	S	Galactose oxidase, central domain	NA	NA	NA	NA	Kelch_3,Kelch_4	OTHER
250401	NA	By matching	By matching	By matching	NA	By MS/MS	By matching	By MS/MS	By MS/MS	By MS/MS	By MS/MS	By matching	0	15491000	14517000	28560000	0	19667000	46166000	31676000	16082000	17746000	50289000	20008000	0	0	0	0	0	0	0	0	0	0	0	0	82508.K1VS55	0	944	COG1404@1|root,KOG3525@2759|Eukaryota,38C1N@33154|Opisthokonta,3NV4P@4751|Fungi,3UZBI@5204|Basidiomycota,3VDQ9@5234|Tremellales	4751|Fungi	O	Proprotein convertase P-domain	KEX2	GO:0000139,GO:0000322,GO:0000323,GO:0000324,GO:0003674,GO:0003824,GO:0004175,GO:0004252,GO:0004857,GO:0004866,GO:0004867,GO:0005488,GO:0005515,GO:0005575,GO:0005622,GO:0005623,GO:0005737,GO:0005773,GO:0005794,GO:0005802,GO:0006508,GO:0006807,GO:0007323,GO:0008150,GO:0008152,GO:0008233,GO:0008236,GO:0009892,GO:0009986,GO:0010466,GO:0010467,GO:0010605,GO:0010951,GO:0012505,GO:0016020,GO:0016485,GO:…	ko:K01341	NA	P_proprotein,Peptidase_S8	SP
250545	By matching	By matching	By matching	By matching	By MS/MS	By MS/MS	By MS/MS	By MS/MS	By matching	By matching	By matching	By matching	8092700	8198000	14980000	14880000	55226000	44563000	43801000	91924000	13351000	50603000	13829000	15116000	0	0	0	14984000	19846000	15822000	0	19526000	14189000	14487000	13386000	8333900	NA	NA	NA	NA	NA	NA	NA	NA	NA	NA	NA	NA	OTHER
250768	By MS/MS	By MS/MS	By MS/MS	By MS/MS	By matching	By MS/MS	By MS/MS	By matching	By MS/MS	By MS/MS	By MS/MS	By MS/MS	40568000	37147000	44520000	42576000	37577000	34493000	39303000	51017000	37804000	34512000	46932000	31572000	0	0	0	0	0	0	0	0	0	0	0	0	1535287.JP74_18320	5.97e-81	250	COG1028@1|root,COG1028@2|Bacteria,1RBTV@1224|Proteobacteria,2U5IM@28211|Alphaproteobacteria	28211|Alphaproteobacteria	IQ	Enoyl-(Acyl carrier protein) reductase	NA	NA	NA	NA	adh_short_C2	OTHER
252185	By matching	By matching	NA	NA	By matching	By MS/MS	By matching	By matching	By matching	NA	By matching	By matching	5389900	5839600	0	0	14540000	16307000	18355000	13582000	17029000	0	14058000	17240000	0	0	0	0	0	0	0	0	0	0	0	0	82508.K1WM09	4.72e-76	247	KOG3966@1|root,KOG3966@2759|Eukaryota,38FF5@33154|Opisthokonta,3P5G9@4751|Fungi,3V1V0@5204|Basidiomycota,3VFAU@5234|Tremellales	4751|Fungi	TV	Etoposide-induced protein 2.4 (EI24)	NA	NA	ko:K10134	ko04115,map04115	EI24	OTHER
252293	By matching	By matching	By matching	By matching	By MS/MS	By MS/MS	NA	By matching	By matching	By matching	By matching	By matching	30234000	37104000	34165000	27572000	50333000	31160000	0	56274000	29866000	26607000	43798000	30813000	0	0	0	0	0	0	0	0	0	0	0	0	5207.AAW40814	0	1082	KOG2176@1|root,KOG2176@2759|Eukaryota,38C01@33154|Opisthokonta,3NWG4@4751|Fungi,3UYRW@5204|Basidiomycota,3VECZ@5234|Tremellales	4751|Fungi	U	Component of the exocyst complex involved in the docking of exocytic vesicles with fusion sites on the plasma membrane	SEC15	GO:0000131,GO:0000145,GO:0003674,GO:0005488,GO:0005515,GO:0005575,GO:0005622,GO:0005623,GO:0005628,GO:0005737,GO:0005933,GO:0005934,GO:0005935,GO:0005937,GO:0005938,GO:0006810,GO:0006886,GO:0006887,GO:0006892,GO:0006893,GO:0006903,GO:0008104,GO:0008150,GO:0009987,GO:0015031,GO:0015833,GO:0016020,GO:0016043,GO:0016192,GO:0017016,GO:0017137,GO:0019899,GO:0030427,GO:0031267,GO:0032940,GO:0032991,GO:…	ko:K19985	NA	Sec15	OTHER
254284	By MS/MS	By MS/MS	By MS/MS	By MS/MS	By MS/MS	By MS/MS	By MS/MS	By MS/MS	By MS/MS	By MS/MS	By MS/MS	By MS/MS	624740000	685380000	68501000	68669000	399480000	184040000	810510000	341910000	435490000	724020000	492220000	370420000	0	0	0	0	0	0	0	0	0	0	0	0	82508.K1WIQ3	2.09e-266	757	COG0598@1|root,2QPTQ@2759|Eukaryota,38FZW@33154|Opisthokonta,3NTYW@4751|Fungi,3UZ2W@5204|Basidiomycota,3VDZG@5234|Tremellales	4751|Fungi	P	CorA-like Mg2+ transporter protein	MNR2	GO:0000322,GO:0000323,GO:0000324,GO:0000329,GO:0003674,GO:0005215,GO:0005575,GO:0005622,GO:0005623,GO:0005737,GO:0005773,GO:0005774,GO:0006810,GO:0006811,GO:0006812,GO:0006873,GO:0006875,GO:0008150,GO:0008324,GO:0009987,GO:0010960,GO:0010961,GO:0015075,GO:0015095,GO:0015318,GO:0015693,GO:0016020,GO:0016021,GO:0019725,GO:0022857,GO:0022890,GO:0030001,GO:0030003,GO:0031090,GO:0031224,GO:0034220,GO:…	ko:K16073	NA	CorA	OTHER
254614	By MS/MS	By MS/MS	By MS/MS	By MS/MS	By MS/MS	By MS/MS	By MS/MS	By MS/MS	By matching	By MS/MS	By matching	By matching	79576000	74482000	142350000	100740000	243470000	185680000	188550000	233630000	59629000	68420000	76799000	98909000	0	0	89031000	84556000	91008000	73266000	90126000	80109000	0	48470000	0	50442000	82508.K1WP63	4.82e-168	495	COG0006@1|root,KOG2414@2759|Eukaryota,39XWN@33154|Opisthokonta,3NV44@4751|Fungi,3V3ZF@5204|Basidiomycota,3VD6G@5234|Tremellales	4751|Fungi	E	Metallopeptidase family M24	NA	NA	NA	NA	Creatinase_N,Peptidase_M24	OTHER
256069	By MS/MS	By MS/MS	By MS/MS	By MS/MS	By MS/MS	By MS/MS	By MS/MS	By MS/MS	By MS/MS	By MS/MS	By MS/MS	By MS/MS	1136900000	1347900000	968350000	987970000	919950000	1425300000	1486300000	1275400000	1256200000	953590000	1318300000	961230000	340330000	335110000	311430000	359600000	289180000	334670000	282560000	296020000	296400000	291480000	302220000	299900000	5207.AAW44915	1.34e-198	563	KOG0594@1|root,KOG0594@2759|Eukaryota,38B58@33154|Opisthokonta,3NVF8@4751|Fungi,3V01X@5204|Basidiomycota,3VCNV@5234|Tremellales	4751|Fungi	T	Belongs to the protein kinase superfamily	PHO85	GO:0000003,GO:0000075,GO:0000077,GO:0000082,GO:0000083,GO:0000086,GO:0000122,GO:0000226,GO:0000278,GO:0000302,GO:0000307,GO:0003674,GO:0003824,GO:0004672,GO:0004674,GO:0004693,GO:0005488,GO:0005515,GO:0005575,GO:0005622,GO:0005623,GO:0005634,GO:0005654,GO:0005737,GO:0005768,GO:0005813,GO:0005815,GO:0005829,GO:0005856,GO:0005979,GO:0006109,GO:0006139,GO:0006259,GO:0006260,GO:0006325,GO:0006355,GO:…	ko:K06655,ko:K08282	ko04111,ko04138,map04111,map04138	Pkinase	OTHER
257630	By MS/MS	By MS/MS	By MS/MS	By MS/MS	By MS/MS	By MS/MS	By MS/MS	By MS/MS	By MS/MS	By MS/MS	By MS/MS	By MS/MS	618440000	661410000	699290000	689500000	1317800000	919230000	1426700000	1142100000	414730000	575990000	446660000	650060000	191630000	211910000	188970000	209230000	267120000	218810000	289590000	237350000	204570000	209910000	199530000	214560000	5207.AAW41194	3.48e-72	241	2E2GY@1|root,2S9QN@2759|Eukaryota,3AAKD@33154|Opisthokonta,3P735@4751|Fungi,3V2C7@5204|Basidiomycota,3VFBR@5234|Tremellales	4751|Fungi	S	CUE domain	NA	NA	NA	NA	CUE	OTHER
258305	By matching	By MS/MS	By MS/MS	By MS/MS	By matching	By MS/MS	By MS/MS	By MS/MS	By MS/MS	By matching	By matching	By matching	63739000	55203000	78454000	20630000	68660000	73905000	32979000	93081000	2349500	28291000	25040000	64743000	34675000	32733000	53214000	24507000	27124000	33845000	24810000	31366000	0	30122000	19675000	31238000	80884.CCF36984	4.92e-160	465	2B03P@1|root,2S072@2759|Eukaryota,39W7B@33154|Opisthokonta,3NUGB@4751|Fungi,3QKTZ@4890|Ascomycota,21762@147550|Sordariomycetes,1EVY7@1028384|Glomerellales	4751|Fungi	H	Ecdysteroid kinase	NA	NA	NA	NA	APH,EcKinase	OTHER
258491	By MS/MS	By MS/MS	By MS/MS	By MS/MS	By MS/MS	By MS/MS	By MS/MS	By MS/MS	By MS/MS	By MS/MS	By MS/MS	By MS/MS	190110000	153590000	600680000	532950000	214140000	12402000	176480000	299160000	399930000	525410000	593700000	411810000	64943000	58595000	169450000	204740000	74153000	13537000	71436000	71514000	277540000	335830000	371160000	159300000	552467.XP_003192622.1	3.64e-117	348	2B9FA@1|root,2S0TT@2759|Eukaryota,39YWD@33154|Opisthokonta,3NZYT@4751|Fungi,3V0WK@5204|Basidiomycota,3VEW3@5234|Tremellales	4751|Fungi	S	metallo-beta-lactamase	NA	NA	NA	NA	Lactamase_B	OTHER
258621	By MS/MS	By MS/MS	By MS/MS	By MS/MS	By MS/MS	By MS/MS	By MS/MS	By MS/MS	By MS/MS	By MS/MS	By MS/MS	By MS/MS	29360000000	25450000000	28599000000	24611000000	4103000000	3825700000	3776800000	4430400000	24078000000	27636000000	29603000000	30443000000	6737200000	5346500000	5730200000	5346800000	650890000	833800000	704030000	653000000	5232400000	5939100000	6313500000	6238800000	82508.K1VQX6	1.51e-203	569	COG1064@1|root,KOG0023@2759|Eukaryota,390GY@33154|Opisthokonta,3NW0B@4751|Fungi,3UYYZ@5204|Basidiomycota,3VE9Q@5234|Tremellales	4751|Fungi	Q	Alcohol dehydrogenase GroES-like domain	ADH1	GO:0000947,GO:0000955,GO:0003674,GO:0003824,GO:0004022,GO:0005575,GO:0005576,GO:0005622,GO:0005623,GO:0005634,GO:0005737,GO:0005739,GO:0005759,GO:0005886,GO:0005975,GO:0005996,GO:0006006,GO:0006066,GO:0006067,GO:0006068,GO:0006081,GO:0006082,GO:0006090,GO:0006091,GO:0006113,GO:0006115,GO:0006116,GO:0006117,GO:0006139,GO:0006163,GO:0006520,GO:0006566,GO:0006567,GO:0006725,GO:0006732,GO:0006733,GO:…	ko:K01568,ko:K13953	ko00010,ko00071,ko00350,ko00625,ko00626,ko00830,ko00980,ko00982,ko01100,ko01110,ko01120,ko01130,ko01220,map00010,map00071,map00350,map00625,map00626,map00830,map00980,map00982,map01100,map01110,map01120,map01130,map01220	ADH_N,ADH_zinc_N	OTHER
259352	By MS/MS	By MS/MS	By MS/MS	By MS/MS	By MS/MS	By MS/MS	By MS/MS	By MS/MS	By MS/MS	By MS/MS	By MS/MS	By MS/MS	661900000	719940000	742190000	552520000	482630000	364330000	401220000	572450000	729060000	691140000	720410000	529680000	0	0	0	0	0	0	0	0	0	0	0	0	NA	NA	NA	NA	NA	NA	NA	NA	NA	NA	NA	NA	OTHER
259455	By MS/MS	By MS/MS	By MS/MS	By MS/MS	By MS/MS	By MS/MS	By MS/MS	By MS/MS	By MS/MS	By MS/MS	By MS/MS	By MS/MS	32418000000	30765000000	34811000000	29880000000	81296000000	71001000000	79637000000	92481000000	34573000000	35471000000	37804000000	35068000000	3302300000	3286900000	3160900000	3328800000	6402400000	7447400000	6712600000	7125400000	3519400000	3339200000	3384100000	3597000000	82508.K1VXE7	0	1697	COG0474@1|root,KOG0205@2759|Eukaryota,38CYC@33154|Opisthokonta,3NUFA@4751|Fungi,3UYHC@5204|Basidiomycota,3VECI@5234|Tremellales	4751|Fungi	P	Plasma membrane	PMA1	GO:0000166,GO:0003674,GO:0003824,GO:0005215,GO:0005488,GO:0005524,GO:0005575,GO:0005622,GO:0005623,GO:0005737,GO:0005739,GO:0005829,GO:0005886,GO:0005887,GO:0006810,GO:0006811,GO:0006812,GO:0006873,GO:0006885,GO:0008144,GO:0008150,GO:0008324,GO:0008553,GO:0009987,GO:0015075,GO:0015077,GO:0015078,GO:0015318,GO:0015399,GO:0015405,GO:0015662,GO:0015672,GO:0016020,GO:0016021,GO:0016043,GO:0016462,GO:…	ko:K01535	ko00190,map00190	Cation_ATPase_N,E1-E2_ATPase,Hydrolase	OTHER
262136	By MS/MS	By MS/MS	By MS/MS	By matching	By MS/MS	By MS/MS	By MS/MS	By MS/MS	By MS/MS	By MS/MS	By MS/MS	By MS/MS	222960000	247980000	230030000	150850000	620720000	613130000	524510000	754080000	267360000	248210000	234730000	323850000	102590000	86544000	77656000	95271000	114760000	177740000	164370000	140170000	80600000	78062000	64811000	113640000	552467.XP_003195584.1	4.37e-263	727	KOG0739@1|root,KOG0739@2759|Eukaryota,38D1Q@33154|Opisthokonta,3NUSN@4751|Fungi,3UXVV@5204|Basidiomycota,3VDQT@5234|Tremellales	4751|Fungi	O	Vps4 C terminal oligomerisation domain	VPS4	GO:0000166,GO:0002790,GO:0003674,GO:0003824,GO:0005488,GO:0005515,GO:0005524,GO:0005575,GO:0005622,GO:0005623,GO:0005634,GO:0005737,GO:0005768,GO:0005783,GO:0006508,GO:0006511,GO:0006605,GO:0006623,GO:0006629,GO:0006807,GO:0006810,GO:0006886,GO:0006900,GO:0006914,GO:0006996,GO:0006997,GO:0006998,GO:0007032,GO:0007033,GO:0007034,GO:0008104,GO:0008144,GO:0008150,GO:0008152,GO:0008202,GO:0009056,GO:…	ko:K12196	ko04144,ko04217,map04144,map04217	AAA,MIT,Vps4_C	OTHER
262683	By matching	By matching	By MS/MS	By matching	NA	NA	By matching	By matching	By MS/MS	By MS/MS	By MS/MS	By MS/MS	33061000	29915000	4735500	65612000	0	0	3709500	9033400	61162000	84147000	4539900	77393000	0	0	0	0	0	0	0	0	0	0	0	0	NA	NA	NA	NA	NA	NA	NA	NA	NA	NA	NA	NA	OTHER
262805	By MS/MS	By MS/MS	By MS/MS	By matching	By MS/MS	By MS/MS	By MS/MS	By MS/MS	By MS/MS	By MS/MS	By matching	By MS/MS	27537000	42397000	12443000	40465000	124170000	121450000	142370000	131110000	30815000	24658000	40280000	103130000	0	24425000	0	0	41019000	55411000	57457000	42324000	0	0	0	50202000	82508.K1VKR9	4.63e-232	644	COG0626@1|root,KOG0053@2759|Eukaryota,38F3Q@33154|Opisthokonta,3NVTU@4751|Fungi,3UYGB@5204|Basidiomycota	4751|Fungi	E	O-acetylhomoserine ami	NA	NA	NA	NA	CoA_binding_2,Cys_Met_Meta_PP	OTHER
263110	By MS/MS	By MS/MS	By MS/MS	By MS/MS	By MS/MS	By MS/MS	By MS/MS	By MS/MS	By MS/MS	By MS/MS	By MS/MS	By MS/MS	25611000000	21360000000	25131000000	20960000000	13488000000	13619000000	13202000000	15171000000	6046500000	7285700000	7402800000	8525700000	4397300000	4145000000	4196200000	4251500000	2256500000	2919600000	2265000000	2106000000	1491300000	1394500000	1569300000	1632100000	82508.K1VGJ2	6.09e-157	452	COG1064@1|root,KOG0023@2759|Eukaryota,390GY@33154|Opisthokonta,3NW0B@4751|Fungi,3UYYZ@5204|Basidiomycota,3VE9Q@5234|Tremellales	4751|Fungi	Q	Alcohol dehydrogenase GroES-like domain	NA	NA	ko:K13953	ko00010,ko00071,ko00350,ko00625,ko00626,ko00830,ko00980,ko00982,ko01100,ko01110,ko01120,ko01130,ko01220,map00010,map00071,map00350,map00625,map00626,map00830,map00980,map00982,map01100,map01110,map01120,map01130,map01220	ADH_N,ADH_zinc_N	OTHER
264024	By MS/MS	By MS/MS	By MS/MS	By MS/MS	By MS/MS	By MS/MS	By MS/MS	By MS/MS	By MS/MS	By MS/MS	By MS/MS	By MS/MS	175260000	173690000	161890000	218200000	578800000	390220000	349120000	458810000	179710000	167790000	130130000	179540000	64144000	45410000	80903000	77092000	110560000	112740000	114930000	92995000	92339000	88987000	74434000	80318000	40483.S8EI94	3.25e-22	101	KOG4234@1|root,KOG4234@2759|Eukaryota,38H74@33154|Opisthokonta,3P42H@4751|Fungi,3V131@5204|Basidiomycota,227IH@155619|Agaricomycetes,3H23Q@355688|Agaricomycetes incertae sedis	4751|Fungi	S	Tetratricopeptide repeat protein	NA	NA	NA	NA	TPR_1	OTHER
265144	By MS/MS	By MS/MS	By MS/MS	By MS/MS	By MS/MS	By MS/MS	By MS/MS	By MS/MS	By MS/MS	By MS/MS	By MS/MS	By MS/MS	402870000	523030000	477280000	357440000	495210000	503060000	626650000	745240000	462420000	468790000	391500000	571870000	134130000	117840000	144960000	150650000	148290000	132340000	117550000	158740000	134860000	121090000	117470000	122700000	82508.K1VKX8	1.57e-62	207	COG0384@1|root,KOG3033@2759|Eukaryota,39RJ0@33154|Opisthokonta,3P5DT@4751|Fungi,3V2HN@5204|Basidiomycota,3VH3X@5234|Tremellales	4751|Fungi	S	Phenazine biosynthesis-like protein	NA	NA	NA	NA	PhzC-PhzF	OTHER
265577	By MS/MS	By MS/MS	By MS/MS	By MS/MS	By MS/MS	By MS/MS	By MS/MS	By MS/MS	By MS/MS	By MS/MS	By MS/MS	By MS/MS	2013500000	1989200000	2167700000	1950300000	4035700000	2669400000	3866000000	3583000000	2345400000	2735800000	2714600000	2572400000	675780000	556140000	983310000	723320000	971560000	846610000	1034100000	1292800000	760760000	902250000	998790000	1146300000	5217.XP_007006972.1	6.12e-35	123	KOG1772@1|root,KOG1772@2759|Eukaryota,3A6AE@33154|Opisthokonta,3P53V@4751|Fungi,3V1M0@5204|Basidiomycota,3VFM7@5234|Tremellales	4751|Fungi	C	Catalytic subunit of the peripheral V1 complex of vacuolar ATPase (V-ATPase). V-ATPase is responsible for acidifying a variety of intracellular compartments in eukaryotic cells	NA	GO:0000166,GO:0000221,GO:0000322,GO:0000323,GO:0000324,GO:0000329,GO:0003674,GO:0003824,GO:0005215,GO:0005488,GO:0005524,GO:0005575,GO:0005622,GO:0005623,GO:0005737,GO:0005773,GO:0005774,GO:0006810,GO:0006811,GO:0006812,GO:0006873,GO:0006885,GO:0007035,GO:0008144,GO:0008150,GO:0008324,GO:0009987,GO:0015075,GO:0015077,GO:0015078,GO:0015318,GO:0015399,GO:0015405,GO:0015672,GO:0015988,GO:0015991,GO:…	ko:K01046,ko:K02152	ko00190,ko00561,ko01100,ko04145,ko04150,ko04721,ko04966,ko05110,ko05120,ko05323,map00190,map00561,map01100,map04145,map04150,map04721,map04966,map05110,map05120,map05323	V-ATPase_G	OTHER
265587	By MS/MS	By MS/MS	By MS/MS	By MS/MS	By MS/MS	By MS/MS	By MS/MS	By MS/MS	By MS/MS	By MS/MS	By MS/MS	By MS/MS	628000000	779280000	695710000	832940000	1485600000	1185300000	1704900000	1368500000	857300000	836850000	948070000	628730000	400090000	480350000	404120000	570040000	601360000	573340000	707430000	506290000	513540000	459870000	447390000	375210000	82508.K1VLZ5	3.43e-175	517	KOG4444@1|root,KOG4444@2759|Eukaryota,39U4Y@33154|Opisthokonta,3NZ41@4751|Fungi,3V112@5204|Basidiomycota,3VE6Z@5234|Tremellales	4751|Fungi	MU	Peroxin-3	PEX3	GO:0003674,GO:0005488,GO:0005515,GO:0005575,GO:0005622,GO:0005623,GO:0005737,GO:0005777,GO:0005778,GO:0005783,GO:0006605,GO:0006612,GO:0006625,GO:0006810,GO:0006886,GO:0006996,GO:0007031,GO:0008104,GO:0008150,GO:0009987,GO:0012505,GO:0015031,GO:0015833,GO:0015919,GO:0016020,GO:0016043,GO:0017038,GO:0030674,GO:0031090,GO:0031903,GO:0032581,GO:0033036,GO:0033365,GO:0034613,GO:0042579,GO:0042886,GO:…	ko:K13336	ko04146,map04146	Peroxin-3	OTHER
265885	By MS/MS	By MS/MS	By MS/MS	By MS/MS	By MS/MS	By MS/MS	By MS/MS	By MS/MS	By MS/MS	By MS/MS	By MS/MS	By MS/MS	469860000	865050000	963470000	516460000	1563100000	1030700000	1631200000	1413200000	463740000	492770000	758810000	448210000	163960000	175630000	167590000	178360000	266570000	223500000	284100000	202920000	134020000	130790000	148140000	127800000	5217.XP_007000786.1	2.74e-236	678	COG5407@1|root,KOG0721@2759|Eukaryota,38CNP@33154|Opisthokonta,3NVTY@4751|Fungi,3UZN1@5204|Basidiomycota,3VD9W@5234|Tremellales	4751|Fungi	O	Sec63 Brl domain	SEC63	GO:0003674,GO:0005215,GO:0005575,GO:0005622,GO:0005623,GO:0005737,GO:0005739,GO:0005783,GO:0005789,GO:0005791,GO:0006605,GO:0006612,GO:0006613,GO:0006614,GO:0006620,GO:0006810,GO:0006886,GO:0008104,GO:0008150,GO:0008565,GO:0012505,GO:0015031,GO:0015833,GO:0016020,GO:0016021,GO:0030867,GO:0031090,GO:0031204,GO:0031205,GO:0031207,GO:0031224,GO:0031984,GO:0032991,GO:0033036,GO:0033365,GO:0034613,GO:…	ko:K09540	ko03060,ko04141,map03060,map04141	DnaJ,Sec63	OTHER
266376	By matching	By matching	By matching	By matching	By MS/MS	By MS/MS	By MS/MS	By MS/MS	By matching	By matching	By matching	By matching	73097000	73728000	51358000	136220000	364370000	361630000	357500000	404190000	83840000	114490000	168000000	84132000	47894000	41585000	0	52769000	138440000	170560000	127280000	138170000	48212000	45513000	49675000	47873000	5207.AAW42422	2.76e-154	444	COG1028@1|root,KOG0725@2759|Eukaryota,38I37@33154|Opisthokonta,3NU20@4751|Fungi,3UYYH@5204|Basidiomycota,3VD85@5234|Tremellales	4751|Fungi	Q	d-arabinitol 2-dehydrogenase	NA	NA	NA	NA	adh_short_C2	OTHER
267961	By MS/MS	By matching	By MS/MS	By MS/MS	By MS/MS	By MS/MS	By matching	By MS/MS	By MS/MS	By MS/MS	By MS/MS	By MS/MS	79830000	72895000	81548000	69522000	102010000	52351000	107800000	92149000	78225000	86281000	93959000	66869000	0	0	0	0	44279000	0	0	36859000	0	0	0	0	82508.K1VJK0	0	987	KOG0211@1|root,KOG0211@2759|Eukaryota,38E8W@33154|Opisthokonta,3NYE9@4751|Fungi,3V0QR@5204|Basidiomycota,3VESS@5234|Tremellales	4751|Fungi	T	Protein serine threonine phosphatase 4 regulatory subunit 1	NA	NA	ko:K15424	NA	HEAT	OTHER
269097	NA	NA	NA	NA	By matching	By MS/MS	By MS/MS	NA	NA	NA	NA	NA	0	0	0	0	27543000	41429000	34749000	0	0	0	0	0	0	0	0	0	0	0	0	0	0	0	0	0	82508.K1V9V3	0	914	COG5069@1|root,KOG1735@1|root,KOG0035@2759|Eukaryota,KOG1735@2759|Eukaryota,38C3U@33154|Opisthokonta,3NVZA@4751|Fungi,3UXX8@5204|Basidiomycota,3VEP4@5234|Tremellales	4751|Fungi	Z	Ca2+ insensitive EF hand	ain1	GO:0000278,GO:0000281,GO:0000910,GO:0000912,GO:0000915,GO:0003674,GO:0003779,GO:0003786,GO:0005488,GO:0005515,GO:0005575,GO:0005622,GO:0005623,GO:0005737,GO:0005826,GO:0005856,GO:0005938,GO:0006996,GO:0007010,GO:0007015,GO:0007049,GO:0008092,GO:0008150,GO:0009987,GO:0015629,GO:0016043,GO:0022402,GO:0022607,GO:0030029,GO:0030036,GO:0030674,GO:0030863,GO:0030864,GO:0030865,GO:0030866,GO:0031032,GO:…	ko:K05765	ko04360,ko04666,ko04810,ko05133,map04360,map04666,map04810,map05133	CH,EFhand_Ca_insen	OTHER
272985	By MS/MS	By matching	By MS/MS	By MS/MS	By matching	By MS/MS	By MS/MS	NA	By MS/MS	By MS/MS	By MS/MS	By matching	108070000	87821000	98626000	91546000	81977000	65774000	100270000	0	92453000	99300000	104200000	99750000	0	0	0	0	0	0	0	0	0	0	0	0	82508.K1WH91	1.33e-254	728	KOG0274@1|root,KOG0274@2759|Eukaryota,38CAJ@33154|Opisthokonta,3NUDS@4751|Fungi,3UYBK@5204|Basidiomycota,3VCWE@5234|Tremellales	4751|Fungi	S	A Receptor for Ubiquitination Targets	sconB	GO:0000082,GO:0000083,GO:0000151,GO:0000152,GO:0000209,GO:0000278,GO:0003674,GO:0005488,GO:0005515,GO:0005575,GO:0005622,GO:0005623,GO:0005634,GO:0006139,GO:0006259,GO:0006260,GO:0006261,GO:0006270,GO:0006275,GO:0006355,GO:0006464,GO:0006508,GO:0006511,GO:0006725,GO:0006807,GO:0007049,GO:0008150,GO:0008152,GO:0009056,GO:0009057,GO:0009058,GO:0009059,GO:0009889,GO:0009987,GO:0010035,GO:0010038,GO:…	ko:K10259	ko04111,ko04120,map04111,map04120	F-box,F-box-like,WD40	OTHER
273920	By MS/MS	By MS/MS	By MS/MS	By MS/MS	By MS/MS	By MS/MS	By MS/MS	By MS/MS	By MS/MS	By MS/MS	By MS/MS	By MS/MS	477890000	724600000	789060000	840270000	1055500000	1082700000	1239800000	1295700000	663190000	671780000	668360000	639250000	183590000	202940000	218360000	229410000	190890000	221360000	178570000	201540000	178840000	193360000	209370000	152650000	5217.XP_007000862.1	1.26999999999859e-314	873	COG0072@1|root,KOG2472@2759|Eukaryota,38BAE@33154|Opisthokonta,3NVJA@4751|Fungi,3UYNC@5204|Basidiomycota,3VENE@5234|Tremellales	4751|Fungi	J	phenylalanyl-tRNA synthetase beta chain	FRS1	GO:0002181,GO:0003674,GO:0003824,GO:0004812,GO:0004826,GO:0005575,GO:0005622,GO:0005623,GO:0005737,GO:0006082,GO:0006139,GO:0006399,GO:0006412,GO:0006418,GO:0006432,GO:0006518,GO:0006520,GO:0006725,GO:0006807,GO:0008150,GO:0008152,GO:0009058,GO:0009059,GO:0009328,GO:0009987,GO:0010467,GO:0016070,GO:0016874,GO:0016875,GO:0019538,GO:0019752,GO:0032991,GO:0034641,GO:0034645,GO:0034660,GO:0043038,GO:…	ko:K01890	ko00970,map00970	B3_4,B5	OTHER
275213	NA	By matching	NA	NA	NA	By matching	NA	By matching	NA	NA	By MS/MS	NA	0	25744000	0	0	0	13516000	0	16668000	0	0	30489000	0	0	0	0	0	0	0	0	0	0	0	0	0	82508.K1VLK8	8.64e-207	615	KOG0592@1|root,KOG0592@2759|Eukaryota,38C50@33154|Opisthokonta,3NWKX@4751|Fungi,3UZP0@5204|Basidiomycota,3VDDD@5234|Tremellales	4751|Fungi	T	Protein tyrosine kinase	PKH1	GO:0000165,GO:0000166,GO:0000196,GO:0001932,GO:0001934,GO:0003674,GO:0003824,GO:0004672,GO:0004674,GO:0004676,GO:0005488,GO:0005524,GO:0005543,GO:0005547,GO:0005575,GO:0005622,GO:0005623,GO:0005634,GO:0005737,GO:0005829,GO:0005938,GO:0006464,GO:0006468,GO:0006793,GO:0006796,GO:0006807,GO:0006810,GO:0006897,GO:0006950,GO:0007034,GO:0007154,GO:0007165,GO:0008144,GO:0008150,GO:0008152,GO:0008289,GO:…	ko:K06276	ko01524,ko03320,ko04011,ko04068,ko04071,ko04140,ko04150,ko04151,ko04152,ko04210,ko04510,ko04660,ko04664,ko04722,ko04910,ko04919,ko04931,ko04960,ko05145,ko05160,ko05205,ko05213,ko05215,ko05223,ko05231,map01524,map03320,map04011,map04068,map04071,map04140,map04150,map04151,map04152,map04210,map04510,map04660,map04664,map04722,map04910,map04919,map04931,map04960,map05145,map05160,map05205,map05213,m…	PH_3,Pkinase	OTHER
275937	By MS/MS	By MS/MS	By matching	By MS/MS	By matching	By matching	By matching	By matching	By MS/MS	By MS/MS	By MS/MS	By matching	31637000	38036000	42106000	43345000	20533000	9651200	12782000	17435000	41110000	42650000	40731000	25997000	0	0	0	0	0	0	0	0	0	0	0	0	NA	NA	NA	NA	NA	NA	NA	NA	NA	NA	NA	NA	OTHER
276872	NA	NA	NA	NA	NA	NA	NA	By MS/MS	NA	NA	NA	NA	0	0	0	0	0	0	0	0	0	0	0	0	0	0	0	0	0	0	0	0	0	0	0	0	82508.K1VPA7	1.65e-162	507	29483@1|root,2RB55@2759|Eukaryota,3AXKC@33154|Opisthokonta,3PIRA@4751|Fungi,3V7YF@5204|Basidiomycota,3VFF8@5234|Tremellales	4751|Fungi	-	-	NA	NA	NA	NA	-	OTHER
276991	NA	NA	By matching	By matching	By matching	By MS/MS	By matching	By MS/MS	By matching	By MS/MS	NA	By matching	0	0	40626000	31608000	54568000	65480000	53350000	88576000	35826000	0	0	17310000	0	0	0	0	0	0	0	0	0	0	0	0	5217.XP_007004526.1	3.4e-247	689	KOG0598@1|root,KOG0598@2759|Eukaryota,38GE3@33154|Opisthokonta,3NVYN@4751|Fungi,3UZHB@5204|Basidiomycota,3VDEX@5234|Tremellales	4751|Fungi	T	Extension to Ser/Thr-type protein kinases	NA	NA	ko:K08793	NA	Pkinase	OTHER
277198	By MS/MS	By MS/MS	By MS/MS	By MS/MS	By MS/MS	By MS/MS	By MS/MS	By MS/MS	By MS/MS	By MS/MS	By MS/MS	By MS/MS	1832400000	1806500000	2101600000	2078100000	6362800000	5699000000	7027900000	7488100000	1749700000	1823600000	2505600000	1056600000	587180000	543880000	544400000	689940000	1140100000	1436500000	1242400000	1211300000	522860000	492790000	573920000	362710000	5217.XP_007004522.1	1.21e-200	566	COG0673@1|root,2QUVQ@2759|Eukaryota,39V77@33154|Opisthokonta,3NXG9@4751|Fungi,3UYK4@5204|Basidiomycota,3VE71@5234|Tremellales	4751|Fungi	S	Putative oxidoreductase C terminal	NA	NA	NA	NA	GFO_IDH_MocA,ox_reductase_C	OTHER
277434	NA	By matching	By MS/MS	By matching	By MS/MS	By MS/MS	By MS/MS	By MS/MS	By matching	By matching	By matching	NA	0	23598000	35832000	21999000	74097000	63621000	34972000	53509000	6453800	8628000	14854000	0	0	0	0	0	0	0	0	0	0	0	0	0	NA	NA	NA	NA	NA	NA	NA	NA	NA	NA	NA	NA	OTHER
277648	By MS/MS	By MS/MS	By MS/MS	By MS/MS	By MS/MS	By MS/MS	By MS/MS	By MS/MS	By MS/MS	By MS/MS	By MS/MS	By MS/MS	33930000000	33437000000	31674000000	26504000000	37997000000	35237000000	36155000000	46850000000	38148000000	43215000000	45173000000	44137000000	3633600000	3593800000	3164600000	3084600000	3007400000	3342900000	2942400000	3256500000	4106600000	3746000000	4111400000	4332100000	552467.XP_003196469.1	0	1442	COG0334@1|root,KOG2250@2759|Eukaryota,390UX@33154|Opisthokonta,3NVNH@4751|Fungi,3UZ5W@5204|Basidiomycota,3VEFJ@5234|Tremellales	4751|Fungi	E	NAD( )-dependent glutamate dehydrogenase which degrades glutamate to ammonia and alpha-ketoglutarate	GDH2	GO:0003674,GO:0003824,GO:0004352,GO:0004353,GO:0005575,GO:0005622,GO:0005623,GO:0005737,GO:0005739,GO:0006082,GO:0006103,GO:0006106,GO:0006520,GO:0006536,GO:0006538,GO:0006807,GO:0008150,GO:0008152,GO:0009056,GO:0009063,GO:0009064,GO:0009065,GO:0009987,GO:0016054,GO:0016491,GO:0016638,GO:0016639,GO:0019551,GO:0019752,GO:0043226,GO:0043227,GO:0043229,GO:0043231,GO:0043436,GO:0043648,GO:0043649,GO:…	ko:K15371	ko00220,ko00250,ko00430,ko00910,ko01100,map00220,map00250,map00430,map00910,map01100	Bac_GDH,ELFV_dehydrog	OTHER
278238	By matching	NA	By MS/MS	By MS/MS	NA	By matching	By matching	By matching	By MS/MS	By matching	By MS/MS	By matching	13939000	0	26843000	21913000	0	17045000	24170000	19538000	13998000	21174000	19446000	18079000	0	0	0	0	0	0	0	0	0	0	0	0	5217.XP_007000820.1	3.87e-273	758	KOG1815@1|root,KOG1815@2759|Eukaryota,38DN7@33154|Opisthokonta,3NWFP@4751|Fungi,3V057@5204|Basidiomycota,3VCUN@5234|Tremellales	4751|Fungi	O	In Between Ring fingers	NA	GO:0000003,GO:0000151,GO:0000209,GO:0000280,GO:0003674,GO:0003824,GO:0004842,GO:0005488,GO:0005515,GO:0005575,GO:0005622,GO:0005623,GO:0005694,GO:0005737,GO:0006325,GO:0006464,GO:0006807,GO:0006996,GO:0007049,GO:0007127,GO:0008150,GO:0008152,GO:0008270,GO:0009056,GO:0009057,GO:0009893,GO:0009894,GO:0009896,GO:0009987,GO:0010604,GO:0016043,GO:0016567,GO:0016569,GO:0016570,GO:0016574,GO:0016740,GO:…	ko:K11968	NA	IBR,zf-C3HC4	OTHER
278619	By matching	By MS/MS	By matching	By matching	By MS/MS	By MS/MS	By matching	By MS/MS	By MS/MS	By matching	By matching	By MS/MS	90828000	98386000	117650000	119370000	71508000	177210000	182700000	205000000	126180000	100760000	115530000	85778000	0	0	0	51873000	32238000	54820000	58389000	72823000	0	0	0	63841000	82508.K1VEX0	1.28e-241	686	KOG3763@1|root,KOG3763@2759|Eukaryota,38G81@33154|Opisthokonta,3NUI3@4751|Fungi,3UZSD@5204|Basidiomycota,3VDE5@5234|Tremellales	4751|Fungi	A	C-terminal domain of vertebrate Tap protein	MEX67	GO:0000054,GO:0000055,GO:0000056,GO:0003674,GO:0003676,GO:0003723,GO:0003729,GO:0005488,GO:0005515,GO:0005575,GO:0005622,GO:0005623,GO:0005634,GO:0005635,GO:0005643,GO:0005654,GO:0005730,GO:0005737,GO:0006403,GO:0006405,GO:0006406,GO:0006611,GO:0006810,GO:0006886,GO:0006913,GO:0008104,GO:0008150,GO:0008152,GO:0010467,GO:0012505,GO:0015031,GO:0015833,GO:0015931,GO:0016020,GO:0016021,GO:0016973,GO:…	ko:K14284	ko03008,ko03013,ko03015,ko05164,ko05168,map03008,map03013,map03015,map05164,map05168	LRR_9,NTF2,TAP_C	OTHER
279205	By matching	By MS/MS	By matching	By matching	By MS/MS	By MS/MS	By MS/MS	By MS/MS	By matching	By matching	By matching	By matching	46615000	66984000	86433000	106350000	142780000	83077000	129330000	125020000	55511000	31393000	106210000	74963000	0	40191000	40781000	44172000	43239000	28659000	54440000	33243000	38181000	0	39977000	0	82508.K1V5V5	6.29e-132	391	COG5033@1|root,KOG3149@2759|Eukaryota,38HA6@33154|Opisthokonta,3P3G2@4751|Fungi,3V0CN@5204|Basidiomycota,3VE0C@5234|Tremellales	4751|Fungi	K	YEATS family	YAF9	GO:0000123,GO:0000228,GO:0000785,GO:0000790,GO:0000812,GO:0005575,GO:0005622,GO:0005623,GO:0005634,GO:0005654,GO:0005694,GO:0005737,GO:0006139,GO:0006259,GO:0006281,GO:0006325,GO:0006338,GO:0006342,GO:0006348,GO:0006355,GO:0006464,GO:0006473,GO:0006475,GO:0006725,GO:0006807,GO:0006950,GO:0006974,GO:0006996,GO:0008150,GO:0008152,GO:0009889,GO:0009890,GO:0009892,GO:0009987,GO:0010468,GO:0010556,GO:…	ko:K11341	NA	YEATS	OTHER
279519	By MS/MS	By MS/MS	By MS/MS	By MS/MS	By MS/MS	By MS/MS	By MS/MS	By MS/MS	By MS/MS	By MS/MS	By MS/MS	By MS/MS	714810000	511850000	617890000	677050000	952490000	454320000	899860000	926240000	762210000	816680000	871250000	783460000	112340000	94627000	96574000	114700000	131110000	108450000	121890000	103700000	107530000	102610000	113500000	98569000	552467.XP_003195786.1	3.55e-237	692	KOG0978@1|root,KOG0978@2759|Eukaryota,38CIM@33154|Opisthokonta,3NW1B@4751|Fungi,3UY29@5204|Basidiomycota,3VDJM@5234|Tremellales	4751|Fungi	O	BRE1 E3 ubiquitin ligase	BRE1	GO:0000003,GO:0000075,GO:0000077,GO:0000151,GO:0000209,GO:0000228,GO:0000278,GO:0000722,GO:0000723,GO:0000724,GO:0000725,GO:0000775,GO:0000785,GO:0000790,GO:0000792,GO:0003674,GO:0003676,GO:0003677,GO:0003688,GO:0003690,GO:0003824,GO:0004842,GO:0005488,GO:0005575,GO:0005622,GO:0005623,GO:0005634,GO:0005694,GO:0005720,GO:0005721,GO:0006139,GO:0006259,GO:0006275,GO:0006281,GO:0006302,GO:0006310,GO:…	ko:K10696	NA	BRE1,zf-C3HC4,zf-C3HC4_2,zf-C3HC4_3	OTHER
280720	By MS/MS	By MS/MS	NA	By MS/MS	By MS/MS	By MS/MS	By MS/MS	By MS/MS	By MS/MS	By MS/MS	By MS/MS	By matching	76182000	85398000	0	0	104980000	52038000	84830000	113620000	118970000	134030000	152780000	23124000	0	0	0	0	32939000	0	36127000	30638000	0	0	0	0	82508.K1VM49	4.58e-164	488	KOG1859@1|root,KOG1259@2759|Eukaryota,38VEQ@33154|Opisthokonta,3Q454@4751|Fungi,3UYTR@5204|Basidiomycota,3VGP4@5234|Tremellales	4751|Fungi	TZ	Leucine rich repeat	NA	NA	NA	NA	LRR_4,LRR_6,LRR_8	OTHER
281247	By MS/MS	By MS/MS	By MS/MS	By MS/MS	By MS/MS	By MS/MS	By MS/MS	By MS/MS	By MS/MS	By MS/MS	By MS/MS	By MS/MS	135050000	188880000	82304000	238730000	238540000	79510000	289660000	75029000	165120000	206610000	146920000	205200000	62471000	77368000	55715000	65942000	63757000	75394000	74143000	61142000	57102000	68161000	48222000	50981000	82508.K1VM34	1.42e-191	534	COG5228@1|root,KOG0304@2759|Eukaryota,38JJE@33154|Opisthokonta,3NXJE@4751|Fungi,3UZS9@5204|Basidiomycota,3VE01@5234|Tremellales	4751|Fungi	A	CAF1 family ribonuclease	POP2	GO:0000175,GO:0000288,GO:0000289,GO:0000291,GO:0000932,GO:0000956,GO:0003674,GO:0003676,GO:0003723,GO:0003729,GO:0003824,GO:0004518,GO:0004527,GO:0004532,GO:0004535,GO:0004540,GO:0005488,GO:0005575,GO:0005622,GO:0005623,GO:0005737,GO:0005937,GO:0006139,GO:0006351,GO:0006354,GO:0006355,GO:0006357,GO:0006366,GO:0006368,GO:0006401,GO:0006402,GO:0006417,GO:0006725,GO:0006807,GO:0008150,GO:0008152,GO:…	ko:K12581	ko03018,map03018	CAF1	OTHER
281710	By MS/MS	By MS/MS	By MS/MS	By MS/MS	By MS/MS	By MS/MS	By MS/MS	By MS/MS	By MS/MS	By MS/MS	By MS/MS	By MS/MS	350920000	348750000	501520000	482430000	846560000	559520000	665210000	795120000	197380000	247000000	361670000	409130000	116710000	103710000	185070000	168140000	168510000	144260000	159940000	117780000	126760000	137590000	140310000	104070000	82508.K1WFR8	0	988	KOG0598@1|root,KOG0598@2759|Eukaryota,38BVS@33154|Opisthokonta,3NU9W@4751|Fungi,3UZQS@5204|Basidiomycota,3VEDK@5234|Tremellales	4751|Fungi	T	Haspin like kinase domain	YPK2	GO:0000228,GO:0000749,GO:0000785,GO:0000790,GO:0001101,GO:0001932,GO:0001933,GO:0003674,GO:0003824,GO:0004672,GO:0004674,GO:0004857,GO:0004860,GO:0005575,GO:0005622,GO:0005623,GO:0005634,GO:0005694,GO:0005737,GO:0005829,GO:0005886,GO:0005933,GO:0005935,GO:0006464,GO:0006468,GO:0006469,GO:0006629,GO:0006644,GO:0006650,GO:0006793,GO:0006796,GO:0006807,GO:0006950,GO:0007154,GO:0007165,GO:0008150,GO:…	ko:K13303	ko04068,ko04151,map04068,map04151	Pkinase,Pkinase_C	OTHER
281722	By matching	By matching	By MS/MS	By matching	By MS/MS	By matching	By MS/MS	By MS/MS	By MS/MS	By MS/MS	By matching	NA	3851800	3250400	21324000	9560700	20308000	3088500	21426000	25441000	16563000	20793000	13008000	0	0	0	0	0	0	0	0	0	0	0	0	0	5217.XP_007002371.1	3.01e-78	236	KOG0420@1|root,KOG0420@2759|Eukaryota,38GRW@33154|Opisthokonta,3NYKV@4751|Fungi,3UZ2X@5204|Basidiomycota,3VF24@5234|Tremellales	4751|Fungi	O	Ubiquitin-conjugating enzyme E2, catalytic domain homologues	UBC12	GO:0003674,GO:0003824,GO:0005575,GO:0005622,GO:0005623,GO:0005737,GO:0006464,GO:0006807,GO:0008150,GO:0008152,GO:0009987,GO:0016740,GO:0019538,GO:0019787,GO:0019788,GO:0032446,GO:0036211,GO:0043170,GO:0043412,GO:0044237,GO:0044238,GO:0044260,GO:0044267,GO:0044424,GO:0044464,GO:0045116,GO:0061650,GO:0061654,GO:0070647,GO:0071704,GO:0140096,GO:1901564	ko:K10579	ko04120,map04120	UQ_con	OTHER
282306	By MS/MS	By MS/MS	By MS/MS	By MS/MS	By MS/MS	By MS/MS	By MS/MS	By MS/MS	By MS/MS	By MS/MS	By MS/MS	By MS/MS	247100000	331030000	437770000	322640000	598720000	329560000	347690000	396570000	314350000	373190000	378930000	241230000	127940000	131070000	123270000	124120000	126500000	115530000	122950000	109620000	108860000	121800000	110220000	119390000	82508.K1VXF0	2.87e-270	783	COG1774@1|root,KOG4679@2759|Eukaryota,38DT3@33154|Opisthokonta,3NZ40@4751|Fungi,3V0FM@5204|Basidiomycota,3VD4Q@5234|Tremellales	4751|Fungi	S	PSP1 C-terminal conserved region	NA	GO:0000932,GO:0003674,GO:0003676,GO:0003723,GO:0003729,GO:0005488,GO:0005575,GO:0005622,GO:0005623,GO:0005737,GO:0005739,GO:0032991,GO:0035770,GO:0036464,GO:0043226,GO:0043227,GO:0043228,GO:0043229,GO:0043231,GO:0043232,GO:0044424,GO:0044444,GO:0044464,GO:0097159,GO:1901363,GO:1990904	NA	NA	PSP1	OTHER
283637	By MS/MS	By MS/MS	By MS/MS	By MS/MS	By MS/MS	By MS/MS	By MS/MS	By MS/MS	By MS/MS	By MS/MS	By MS/MS	By MS/MS	196300000	186020000	283240000	154780000	207310000	166250000	185510000	226220000	163670000	179850000	217770000	186130000	105860000	90379000	79337000	71165000	47958000	40900000	43878000	40875000	82415000	83027000	81863000	90871000	NA	NA	NA	NA	NA	NA	NA	NA	NA	NA	NA	NA	OTHER
285275	By MS/MS	By MS/MS	By MS/MS	By MS/MS	By MS/MS	By MS/MS	By MS/MS	By MS/MS	By MS/MS	By MS/MS	By MS/MS	By MS/MS	5660700000	5526800000	6236400000	4298500000	1560200000	1472000000	1518900000	1815000000	5832700000	6561800000	6834400000	5590900000	1640300000	1655200000	1472900000	1638200000	359920000	397800000	373470000	333180000	1550700000	1606100000	1416600000	1289100000	82508.K1VMK5	4.33e-108	321	COG1024@1|root,KOG1679@2759|Eukaryota,38CD5@33154|Opisthokonta,3NWFN@4751|Fungi,3VA1D@5204|Basidiomycota,3VGVK@5234|Tremellales	4751|Fungi	I	Belongs to the enoyl-CoA hydratase isomerase family	NA	NA	ko:K05607	ko00280,ko01100,map00280,map01100	ECH_1	OTHER
285836	NA	NA	NA	NA	By MS/MS	By MS/MS	By MS/MS	By MS/MS	NA	NA	NA	NA	0	0	0	0	41738000	22357000	41813000	54087000	0	0	0	0	0	0	0	0	0	0	0	0	0	0	0	0	82508.K1WGI9	2.13e-53	184	COG5097@1|root,KOG3169@2759|Eukaryota,39SM4@33154|Opisthokonta,3P0AP@4751|Fungi,3V1SW@5204|Basidiomycota,3VF35@5234|Tremellales	4751|Fungi	K	MED6 mediator sub complex component	MED6	GO:0000428,GO:0001128,GO:0003674,GO:0003712,GO:0003713,GO:0005575,GO:0005622,GO:0005623,GO:0005634,GO:0005654,GO:0005667,GO:0006139,GO:0006351,GO:0006352,GO:0006355,GO:0006357,GO:0006366,GO:0006367,GO:0006725,GO:0006807,GO:0008150,GO:0008152,GO:0009058,GO:0009059,GO:0009889,GO:0009891,GO:0009893,GO:0009987,GO:0010467,GO:0010468,GO:0010556,GO:0010557,GO:0010604,GO:0010628,GO:0016043,GO:0016070,GO:…	ko:K15128	NA	Med6	OTHER
285936	By matching	NA	By MS/MS	By MS/MS	By MS/MS	By MS/MS	NA	By matching	By matching	By MS/MS	By MS/MS	By MS/MS	22669000	0	35988000	25735000	60892000	24489000	0	30241000	26640000	31286000	19528000	28661000	0	0	0	0	0	0	0	0	0	0	0	0	82508.K1VV76	8.11e-66	223	2E4GX@1|root,2SBDA@2759|Eukaryota,3A9BP@33154|Opisthokonta,3P7WC@4751|Fungi,3V2G1@5204|Basidiomycota,3VFQB@5234|Tremellales	4751|Fungi	-	-	NA	NA	NA	NA	Pex24p	OTHER
286439	By MS/MS	By MS/MS	By MS/MS	By MS/MS	By matching	By MS/MS	By matching	By matching	By MS/MS	By MS/MS	By MS/MS	By MS/MS	338390000	459280000	493740000	432460000	141200000	83539000	49597000	43112000	214640000	255700000	252380000	263610000	138890000	146100000	195440000	151720000	86815000	0	0	0	88109000	91778000	83224000	105380000	1502852.FG94_05164	7.67e-134	388	COG0596@1|root,COG0596@2|Bacteria,1MUVB@1224|Proteobacteria,2VIJK@28216|Betaproteobacteria,472TZ@75682|Oxalobacteraceae	28216|Betaproteobacteria	S	Alpha/beta hydrolase family	dehH1	NA	ko:K01561	ko00361,ko00625,ko01100,ko01120,map00361,map00625,map01100,map01120	Abhydrolase_1	OTHER
288030	NA	NA	NA	NA	By MS/MS	By matching	NA	By MS/MS	NA	NA	NA	NA	0	0	0	0	49855000	38464000	0	61073000	0	0	0	0	0	0	0	0	0	0	0	0	0	0	0	0	264951.V5G2B2	1.73e-32	124	2C6K5@1|root,2S03H@2759|Eukaryota,3A2UQ@33154|Opisthokonta,3P3DQ@4751|Fungi,3QTMB@4890|Ascomycota,20I4Q@147545|Eurotiomycetes,3S8S7@5042|Eurotiales	4751|Fungi	S	Nucleoside-diphosphate-sugar epimerase	NA	NA	NA	NA	-	OTHER
288949	By MS/MS	By MS/MS	By MS/MS	By MS/MS	By MS/MS	By MS/MS	By MS/MS	By MS/MS	By MS/MS	By MS/MS	By MS/MS	By MS/MS	218830000	170790000	207320000	212730000	408290000	342450000	386530000	384940000	170430000	204060000	170920000	187290000	136800000	111280000	118720000	145690000	92740000	127440000	110120000	85817000	116000000	128620000	90967000	92726000	82508.K1VM94	1.72e-56	202	COG4775@1|root,KOG2602@2759|Eukaryota,38E84@33154|Opisthokonta,3NUW7@4751|Fungi,3UZ5Q@5204|Basidiomycota,3VERU@5234|Tremellales	4751|Fungi	M	Surface antigen	NA	GO:0001401,GO:0005575,GO:0005622,GO:0005623,GO:0005737,GO:0005739,GO:0005740,GO:0005741,GO:0006605,GO:0006626,GO:0006810,GO:0006839,GO:0006886,GO:0006996,GO:0007005,GO:0007006,GO:0008104,GO:0008150,GO:0009987,GO:0015031,GO:0015833,GO:0016020,GO:0016043,GO:0017038,GO:0019867,GO:0031090,GO:0031966,GO:0031967,GO:0031968,GO:0031975,GO:0032991,GO:0033036,GO:0033365,GO:0034613,GO:0042886,GO:0043226,GO:…	ko:K07277	NA	Bac_surface_Ag	OTHER
289506	NA	NA	NA	NA	NA	By MS/MS	By matching	NA	NA	NA	NA	NA	0	0	0	0	0	24475000	24699000	0	0	0	0	0	0	0	0	0	0	0	0	0	0	0	0	0	NA	NA	NA	NA	NA	NA	NA	NA	NA	NA	NA	NA	SP
289975	By matching	NA	By matching	By matching	By MS/MS	By MS/MS	By MS/MS	By MS/MS	By matching	By matching	By matching	By MS/MS	49188000	0	21613000	64000000	398030000	175660000	317490000	376460000	27693000	45347000	61960000	73915000	29476000	0	0	31246000	68150000	39863000	51555000	53722000	24909000	0	0	23534000	82508.K1WTZ1	7.6e-239	761	28PRR@1|root,2QWE7@2759|Eukaryota,38HGG@33154|Opisthokonta,3NZET@4751|Fungi,3UYA7@5204|Basidiomycota,3VEJS@5234|Tremellales	4751|Fungi	T	Meiotic cell cortex C-terminal pleckstrin homology	NA	GO:0000001,GO:0000003,GO:0000226,GO:0000266,GO:0000280,GO:0003674,GO:0005488,GO:0005515,GO:0005575,GO:0005622,GO:0005623,GO:0005737,GO:0005739,GO:0005856,GO:0005938,GO:0006810,GO:0006928,GO:0006996,GO:0007005,GO:0007010,GO:0007017,GO:0007018,GO:0007049,GO:0007097,GO:0007127,GO:0008092,GO:0008104,GO:0008150,GO:0009987,GO:0010970,GO:0015630,GO:0015631,GO:0016043,GO:0022402,GO:0022414,GO:0030473,GO:…	ko:K17978	NA	Mcp5_PH	OTHER
290106	By MS/MS	By MS/MS	By MS/MS	By MS/MS	By MS/MS	By MS/MS	By MS/MS	By MS/MS	By MS/MS	By MS/MS	By MS/MS	By MS/MS	469090000	366610000	366970000	374850000	149200000	150050000	162370000	153940000	473710000	384290000	389990000	366520000	157950000	144630000	157230000	160620000	49260000	64640000	0	58345000	139880000	118030000	122790000	141970000	5207.AAW41801	2.29e-296	814	COG4948@1|root,2QU7C@2759|Eukaryota,38DY2@33154|Opisthokonta,3NWIZ@4751|Fungi,3UYV7@5204|Basidiomycota,3VDH2@5234|Tremellales	4751|Fungi	M	Mandelate racemase / muconate lactonizing enzyme, C-terminal domain	NA	NA	ko:K18334	ko00051,ko01120,map00051,map01120	MR_MLE_C,MR_MLE_N	OTHER
291061	NA	By MS/MS	By matching	By MS/MS	By matching	By MS/MS	By matching	By MS/MS	By MS/MS	By matching	By MS/MS	By MS/MS	0	219820000	202230000	180270000	354690000	255610000	470470000	331460000	248720000	274560000	250920000	273930000	0	0	0	0	0	0	0	0	0	0	0	0	82508.K1VHD1	1.29e-101	301	COG0456@1|root,KOG3138@2759|Eukaryota,39V9I@33154|Opisthokonta,3P5NM@4751|Fungi,3V1MH@5204|Basidiomycota,3VE7X@5234|Tremellales	4751|Fungi	S	N-acetyltransferase NAT13	NAT5	GO:0003674,GO:0003824,GO:0004596,GO:0005575,GO:0005622,GO:0005623,GO:0005737,GO:0006464,GO:0006473,GO:0006474,GO:0006807,GO:0008080,GO:0008150,GO:0008152,GO:0009987,GO:0010467,GO:0016407,GO:0016410,GO:0016740,GO:0016746,GO:0016747,GO:0019538,GO:0031248,GO:0031365,GO:0031414,GO:0031415,GO:0032991,GO:0034212,GO:0036211,GO:0043170,GO:0043412,GO:0043543,GO:0044237,GO:0044238,GO:0044260,GO:0044267,GO:…	ko:K20793	NA	Acetyltransf_1	OTHER
291360	By matching	By matching	By matching	NA	By MS/MS	By MS/MS	By MS/MS	By MS/MS	By matching	By matching	By matching	By matching	7756000	13128000	24127000	0	92634000	91954000	89321000	111490000	17520000	29238000	29025000	14248000	0	0	0	0	26211000	25124000	21708000	22224000	0	0	0	0	5207.AAW45672	2.2e-142	423	2BQPN@1|root,2S1UQ@2759|Eukaryota,3A506@33154|Opisthokonta,3P41R@4751|Fungi,3V1IF@5204|Basidiomycota,3VGBU@5234|Tremellales	4751|Fungi	S	WD domain, G-beta repeat	NA	NA	NA	NA	WD40	OTHER
291851	By MS/MS	By MS/MS	By MS/MS	By MS/MS	By MS/MS	By MS/MS	By MS/MS	By MS/MS	By MS/MS	By MS/MS	By MS/MS	By MS/MS	1674500000	1641100000	2423600000	2002300000	3375700000	3131200000	3623300000	4353300000	1777400000	1897700000	2151700000	2141800000	305590000	298310000	364580000	324490000	359090000	359570000	409220000	395130000	295880000	310520000	283090000	327690000	82508.K1W7P0	0	1226	COG1525@1|root,KOG2039@2759|Eukaryota,38HTP@33154|Opisthokonta,3NVE3@4751|Fungi,3UZU3@5204|Basidiomycota,3VD0V@5234|Tremellales	4751|Fungi	K	Tudor domain	NA	GO:0003674,GO:0003676,GO:0003723,GO:0003824,GO:0004518,GO:0005488,GO:0005575,GO:0005622,GO:0005623,GO:0005634,GO:0005737,GO:0006139,GO:0006325,GO:0006342,GO:0006355,GO:0006401,GO:0006725,GO:0006807,GO:0006996,GO:0008150,GO:0008152,GO:0009056,GO:0009057,GO:0009889,GO:0009890,GO:0009892,GO:0009987,GO:0010468,GO:0010556,GO:0010558,GO:0010605,GO:0010629,GO:0016043,GO:0016070,GO:0016442,GO:0016458,GO:…	ko:K15979	ko05169,ko05203,map05169,map05203	SNase,TUDOR	OTHER
292348	By MS/MS	By MS/MS	By MS/MS	By MS/MS	By MS/MS	By MS/MS	By MS/MS	By MS/MS	By MS/MS	By MS/MS	By MS/MS	By MS/MS	12832000000	14072000000	14127000000	12334000000	22972000000	18574000000	22083000000	26862000000	16468000000	18362000000	17547000000	18190000000	1866300000	2120700000	2008300000	2234300000	2592600000	2867600000	2556500000	2903700000	2308000000	2340500000	2093000000	2335100000	82508.K1VRU2	3.5e-251	707	COG0076@1|root,KOG1383@2759|Eukaryota,38HST@33154|Opisthokonta,3NUJY@4751|Fungi,3UZVF@5204|Basidiomycota,3VCSM@5234|Tremellales	4751|Fungi	E	Belongs to the group II decarboxylase family	GAD1	GO:0003674,GO:0003824,GO:0004351,GO:0005575,GO:0005622,GO:0005623,GO:0005737,GO:0006082,GO:0006520,GO:0006536,GO:0006538,GO:0006807,GO:0006950,GO:0006979,GO:0008150,GO:0008152,GO:0009056,GO:0009063,GO:0009064,GO:0009065,GO:0009987,GO:0016054,GO:0016829,GO:0016830,GO:0016831,GO:0019752,GO:0033554,GO:0034599,GO:0042221,GO:0043436,GO:0043648,GO:0043649,GO:0044237,GO:0044238,GO:0044248,GO:0044281,GO:…	ko:K01580	ko00250,ko00410,ko00430,ko00650,ko01100,ko01110,ko01120,ko02024,ko04727,ko04940,map00250,map00410,map00430,map00650,map01100,map01110,map01120,map02024,map04727,map04940	Pyridoxal_deC	OTHER
293788	By MS/MS	By MS/MS	By MS/MS	By MS/MS	NA	By matching	NA	By matching	By MS/MS	NA	NA	By MS/MS	38768000	52578000	58122000	35766000	0	71884000	0	106970000	32446000	0	0	43020000	0	0	0	0	0	0	0	0	0	0	0	0	NA	NA	NA	NA	NA	NA	NA	NA	NA	NA	NA	NA	OTHER
294573	By MS/MS	By MS/MS	By MS/MS	By MS/MS	By MS/MS	By MS/MS	By MS/MS	By MS/MS	By MS/MS	By MS/MS	By MS/MS	By MS/MS	882200000	1073900000	1059500000	668760000	606270000	731610000	617100000	834130000	868920000	955770000	1037500000	1068100000	830610000	1020900000	863830000	538860000	0	0	0	0	812530000	797690000	759370000	0	NA	NA	NA	NA	NA	NA	NA	NA	NA	NA	NA	NA	OTHER
296125	By matching	By matching	By MS/MS	By matching	By matching	By MS/MS	By matching	By MS/MS	By MS/MS	By MS/MS	By matching	By MS/MS	42704000	24945000	70997000	77383000	39588000	53969000	29222000	55882000	53442000	49651000	80880000	79937000	0	0	0	0	0	0	0	0	0	0	0	0	65672.G4TS34	4.24e-33	122	COG0454@1|root,2S8FT@2759|Eukaryota,3A9GA@33154|Opisthokonta,3P6UG@4751|Fungi,3V2FP@5204|Basidiomycota,229ZM@155619|Agaricomycetes,3H5JB@355688|Agaricomycetes incertae sedis	4751|Fungi	K	Acetyltransferase (GNAT) domain	NA	NA	NA	NA	Acetyltransf_1,Acetyltransf_10	OTHER
296620	By MS/MS	By MS/MS	By MS/MS	By MS/MS	By MS/MS	By MS/MS	By MS/MS	By MS/MS	By MS/MS	By MS/MS	By MS/MS	By MS/MS	1186400000	1412100000	733540000	354960000	769910000	781840000	827880000	776330000	322520000	411860000	428300000	385150000	292850000	331210000	258730000	196460000	330990000	332060000	336330000	319050000	176370000	218070000	175860000	238530000	82508.K1WCR1	4.01e-175	498	COG0604@1|root,KOG1198@2759|Eukaryota,38G7C@33154|Opisthokonta,3NUXG@4751|Fungi,3UZTY@5204|Basidiomycota	4751|Fungi	C	nad-p-binding protein	NA	NA	NA	NA	ADH_N,ADH_zinc_N	OTHER
298029	By matching	By MS/MS	NA	By MS/MS	By MS/MS	NA	By MS/MS	By matching	NA	NA	By MS/MS	By matching	27685000	17501000	0	45774000	16032000	0	12240000	29994000	0	0	14072000	12916000	0	0	0	0	0	0	0	0	0	0	0	0	82508.K1VHA0	0	3407	COG0297@1|root,2QSGC@2759|Eukaryota,38EG4@33154|Opisthokonta,3NUIM@4751|Fungi,3V080@5204|Basidiomycota,3VCUF@5234|Tremellales	4751|Fungi	M	Starch synthase catalytic domain	NA	NA	ko:K00749	NA	Alpha-amylase,Glyco_transf_5,Glycos_transf_1	SP
298029	By matching	By MS/MS	NA	By MS/MS	By MS/MS	NA	By MS/MS	By matching	NA	NA	By MS/MS	By matching	27685000	17501000	0	45774000	16032000	0	12240000	29994000	0	0	14072000	12916000	0	0	0	0	0	0	0	0	0	0	0	0	82508.K1VHA0	0	3407	COG0297@1|root,2QSGC@2759|Eukaryota,38EG4@33154|Opisthokonta,3NUIM@4751|Fungi,3V080@5204|Basidiomycota,3VCUF@5234|Tremellales	4751|Fungi	M	Starch synthase catalytic domain	NA	NA	ko:K00749	NA	Alpha-amylase,Glyco_transf_5,Glycos_transf_1	SP
298029	By matching	By MS/MS	NA	By MS/MS	By MS/MS	NA	By MS/MS	By matching	NA	NA	By MS/MS	By matching	27685000	17501000	0	45774000	16032000	0	12240000	29994000	0	0	14072000	12916000	0	0	0	0	0	0	0	0	0	0	0	0	82508.K1VHA0	0	3407	COG0297@1|root,2QSGC@2759|Eukaryota,38EG4@33154|Opisthokonta,3NUIM@4751|Fungi,3V080@5204|Basidiomycota,3VCUF@5234|Tremellales	4751|Fungi	M	Starch synthase catalytic domain	NA	NA	ko:K00749	NA	Alpha-amylase,Glyco_transf_5,Glycos_transf_1	SP
298783	NA	NA	NA	NA	By MS/MS	By MS/MS	By MS/MS	By MS/MS	NA	NA	NA	NA	0	0	0	0	16055000	23163000	26795000	29903000	0	0	0	0	0	0	0	0	0	0	0	0	0	0	0	0	82508.K1WYJ1	3.8e-150	442	KOG1558@1|root,KOG1558@2759|Eukaryota,39UIU@33154|Opisthokonta,3NWTS@4751|Fungi,3V0KQ@5204|Basidiomycota,3VGWA@5234|Tremellales	4751|Fungi	P	ZIP Zinc transporter	NA	NA	ko:K14709	NA	Zip	SP
299177	By MS/MS	By MS/MS	By MS/MS	By MS/MS	By MS/MS	By MS/MS	By MS/MS	By MS/MS	By MS/MS	By MS/MS	By MS/MS	By MS/MS	12008000000	12041000000	12408000000	12266000000	10774000000	9229900000	10404000000	11104000000	11452000000	12137000000	11898000000	12451000000	5196300000	5002200000	4982600000	5729600000	3701900000	3835700000	3356600000	3201700000	5087800000	4751200000	4486700000	5115000000	NA	NA	NA	NA	NA	NA	NA	NA	NA	NA	NA	NA	OTHER
299673	By MS/MS	By MS/MS	By MS/MS	By MS/MS	By MS/MS	By MS/MS	By MS/MS	By MS/MS	By MS/MS	By MS/MS	By MS/MS	By MS/MS	5010300000	5437000000	6010300000	5102400000	5766900000	5245800000	5235600000	6436000000	5256900000	6128900000	6233900000	5994900000	660730000	661310000	678160000	692780000	519100000	557250000	483680000	499830000	673740000	628210000	666640000	663210000	82508.K1V2B9	0	2042	COG0458@1|root,KOG0370@2759|Eukaryota,38GWT@33154|Opisthokonta,3NUIJ@4751|Fungi,3UYAF@5204|Basidiomycota,3VDJA@5234|Tremellales	4751|Fungi	EF	Carbamoyl-phosphate synthetase large chain, oligomerisation domain	CPA2	GO:0000050,GO:0000166,GO:0003674,GO:0003824,GO:0004087,GO:0004088,GO:0005488,GO:0005524,GO:0005575,GO:0005622,GO:0005623,GO:0005737,GO:0005951,GO:0006082,GO:0006139,GO:0006206,GO:0006207,GO:0006520,GO:0006525,GO:0006526,GO:0006725,GO:0006807,GO:0008144,GO:0008150,GO:0008152,GO:0008652,GO:0009058,GO:0009064,GO:0009084,GO:0009112,GO:0009987,GO:0016053,GO:0016874,GO:0016879,GO:0016884,GO:0017076,GO:…	ko:K01955	ko00240,ko00250,ko01100,map00240,map00250,map01100	CPSase_L_D2,CPSase_L_D3	OTHER
301664	NA	NA	By matching	By matching	NA	NA	NA	NA	By MS/MS	By MS/MS	NA	By MS/MS	0	0	61713000	51426000	0	0	0	0	71458000	90837000	0	51964000	0	0	0	0	0	0	0	0	0	0	0	0	NA	NA	NA	NA	NA	NA	NA	NA	NA	NA	NA	NA	OTHER
301677	By matching	By MS/MS	By MS/MS	By matching	By MS/MS	By MS/MS	By MS/MS	By MS/MS	By matching	By matching	By MS/MS	By matching	53131000	35484000	93004000	67394000	145270000	71974000	185880000	170900000	106230000	127010000	138680000	129110000	39364000	25992000	49394000	60666000	56337000	29681000	65224000	63124000	60599000	64479000	55533000	70130000	NA	NA	NA	NA	NA	NA	NA	NA	NA	NA	NA	NA	OTHER
303768	By MS/MS	By MS/MS	By MS/MS	By MS/MS	By MS/MS	By MS/MS	By MS/MS	By MS/MS	By MS/MS	By MS/MS	By MS/MS	By MS/MS	1871800000	1939000000	1624100000	1916700000	1754500000	1886800000	1581300000	1904200000	1733900000	2014300000	2101100000	2152500000	430940000	491190000	476360000	518650000	290690000	360890000	279180000	277550000	427500000	443600000	411730000	394990000	82508.K1VKE5	2.24e-273	763	COG2057@1|root,KOG3822@2759|Eukaryota,38C4R@33154|Opisthokonta,3NXV8@4751|Fungi,3UZT1@5204|Basidiomycota,3VE69@5234|Tremellales	4751|Fungi	H	Key enzyme for ketone body catabolism. Transfers the CoA moiety from succinate to acetoacetate. Formation of the enzyme-CoA intermediate proceeds via an unstable anhydride species formed between the carboxylate groups of the enzyme and substrate	NA	NA	ko:K01027	ko00072,ko00280,ko00650,map00072,map00280,map00650	CoA_trans	OTHER
304271	By MS/MS	By MS/MS	By MS/MS	By MS/MS	By MS/MS	By MS/MS	By MS/MS	By MS/MS	By MS/MS	By MS/MS	By MS/MS	By MS/MS	16085000	51109000	57233000	47467000	88684000	43348000	57690000	38957000	21762000	36775000	33254000	31081000	0	36241000	31219000	36725000	39752000	27484000	27326000	0	0	0	0	0	82508.K1VMH1	0	1022	COG0642@1|root,KOG0519@2759|Eukaryota,38E1E@33154|Opisthokonta,3NXNC@4751|Fungi,3UYDH@5204|Basidiomycota,3VDS4@5234|Tremellales	4751|Fungi	T	His Kinase A (phosphoacceptor) domain	NA	NA	NA	NA	HATPase_c,HisKA,MHYT,Response_reg	OTHER
305767	By matching	By MS/MS	By MS/MS	By matching	By matching	By matching	By matching	By MS/MS	By matching	By matching	By matching	By MS/MS	54689000	21056000	69415000	22383000	16740000	34988000	32513000	77189000	54615000	51863000	29543000	77797000	0	0	0	0	0	0	0	0	0	0	0	0	82508.K1V9N5	1.13e-102	318	2E40U@1|root,2SAZM@2759|Eukaryota,3A9CW@33154|Opisthokonta,3P7B6@4751|Fungi,3V2II@5204|Basidiomycota,3VF74@5234|Tremellales	4751|Fungi	-	-	NA	NA	NA	NA	LRR_6	OTHER
306218	NA	NA	NA	By matching	By MS/MS	NA	By matching	By MS/MS	By matching	NA	NA	By matching	0	0	0	16495000	27801000	0	29586000	20862000	13859000	0	0	14854000	0	0	0	0	0	0	0	0	0	0	0	0	82508.K1WV28	3e-261	739	COG2273@1|root,2QR13@2759|Eukaryota,38E3H@33154|Opisthokonta,3NUWF@4751|Fungi,3V3IN@5204|Basidiomycota,3VCYK@5234|Tremellales	4751|Fungi	G	Beta-glucan synthesis-associated protein	NA	NA	ko:K21850	NA	SKN1	OTHER
306241	By MS/MS	By MS/MS	By MS/MS	By MS/MS	By MS/MS	By MS/MS	By MS/MS	By MS/MS	By MS/MS	By MS/MS	By MS/MS	By MS/MS	199010000	156340000	139030000	116540000	258280000	240610000	181890000	354830000	216070000	282080000	242430000	189250000	85407000	65164000	52479000	44440000	70833000	107000000	74599000	77472000	76902000	96470000	73559000	90698000	5217.XP_007002463.1	6.94e-165	470	KOG0118@1|root,KOG0118@2759|Eukaryota,38BB5@33154|Opisthokonta,3NUMG@4751|Fungi,3UXXW@5204|Basidiomycota,3VF1U@5234|Tremellales	4751|Fungi	A	Nuclear mRNA splicing	CWC2	GO:0000375,GO:0000377,GO:0000387,GO:0000398,GO:0000974,GO:0003674,GO:0003676,GO:0003723,GO:0005488,GO:0005575,GO:0005622,GO:0005623,GO:0005634,GO:0005681,GO:0005684,GO:0006139,GO:0006396,GO:0006397,GO:0006725,GO:0006807,GO:0008150,GO:0008152,GO:0008380,GO:0009893,GO:0009987,GO:0010467,GO:0010468,GO:0010604,GO:0010628,GO:0016043,GO:0016070,GO:0016071,GO:0017069,GO:0017070,GO:0019219,GO:0019222,GO:…	NA	NA	RRM_1,Torus	OTHER
307152	By MS/MS	By MS/MS	By MS/MS	By MS/MS	By MS/MS	By MS/MS	By MS/MS	By MS/MS	By MS/MS	By MS/MS	By MS/MS	By MS/MS	4722300000	5008400000	5542500000	4726100000	5986200000	5129700000	5151200000	6999500000	5522200000	6367500000	6443300000	6805400000	945870000	1067700000	1091500000	1050700000	895170000	923280000	794390000	891440000	1101400000	1075400000	1032200000	1117200000	82508.K1W9Z1	0	1027	COG0138@1|root,KOG2555@2759|Eukaryota,38H8U@33154|Opisthokonta,3NY4C@4751|Fungi,3V011@5204|Basidiomycota,3VDYW@5234|Tremellales	4751|Fungi	F	AICARFT/IMPCHase bienzyme	ADE17	GO:0000003,GO:0003006,GO:0003674,GO:0003824,GO:0003937,GO:0004643,GO:0005575,GO:0005622,GO:0005623,GO:0005737,GO:0005829,GO:0005886,GO:0006091,GO:0006139,GO:0006163,GO:0006164,GO:0006188,GO:0006189,GO:0006725,GO:0006753,GO:0006793,GO:0006796,GO:0006807,GO:0007049,GO:0008150,GO:0008152,GO:0009058,GO:0009060,GO:0009117,GO:0009123,GO:0009124,GO:0009126,GO:0009127,GO:0009150,GO:0009152,GO:0009156,GO:…	ko:K00602	ko00230,ko00670,ko01100,ko01110,ko01130,ko01523,map00230,map00670,map01100,map01110,map01130,map01523	AICARFT_IMPCHas,MGS	OTHER
307796	By MS/MS	By MS/MS	By MS/MS	By MS/MS	By MS/MS	By MS/MS	By MS/MS	By MS/MS	By MS/MS	By MS/MS	By MS/MS	By MS/MS	410470000	358040000	415670000	492170000	653800000	388480000	412360000	604930000	571900000	566360000	491110000	537910000	122700000	122480000	121050000	197550000	126410000	96621000	90414000	119290000	188760000	180920000	150760000	153430000	NA	NA	NA	NA	NA	NA	NA	NA	NA	NA	NA	NA	OTHER
307900	NA	NA	By matching	By MS/MS	By MS/MS	By matching	By MS/MS	By MS/MS	By matching	By matching	By MS/MS	NA	0	0	41487000	39086000	93630000	46788000	75069000	92624000	24978000	36128000	45725000	0	0	0	0	0	34868000	0	31468000	32749000	0	0	0	0	82508.K1WA09	6.32e-176	499	COG1094@1|root,KOG2874@2759|Eukaryota,38C7I@33154|Opisthokonta,3NTXU@4751|Fungi,3UY3R@5204|Basidiomycota,3VCY2@5234|Tremellales	4751|Fungi	A	Required for 40S ribosome biogenesis. Involved in nucleolar processing of pre-18S ribosomal RNA and ribosome assembly	KRR1	GO:0000447,GO:0000460,GO:0000462,GO:0000466,GO:0000469,GO:0000478,GO:0000479,GO:0003674,GO:0003676,GO:0003723,GO:0005488,GO:0005575,GO:0005622,GO:0005623,GO:0005634,GO:0005730,GO:0006139,GO:0006364,GO:0006396,GO:0006725,GO:0006807,GO:0008150,GO:0008152,GO:0009987,GO:0010467,GO:0016070,GO:0016072,GO:0022613,GO:0030490,GO:0030684,GO:0030686,GO:0031974,GO:0031981,GO:0032040,GO:0032991,GO:0034470,GO:…	ko:K06961	NA	-	OTHER
308051	By MS/MS	By matching	By MS/MS	By MS/MS	By MS/MS	By MS/MS	By MS/MS	By MS/MS	By MS/MS	By matching	By MS/MS	By matching	64918000	30768000	100700000	105700000	236110000	196540000	201150000	265480000	55893000	48873000	43957000	73626000	73532000	0	77544000	91590000	67468000	66008000	74877000	62032000	62499000	54447000	0	44790000	5207.AAW43176	3.29e-129	429	28KBK@1|root,2QSSK@2759|Eukaryota,38F3U@33154|Opisthokonta,3NU72@4751|Fungi,3UY51@5204|Basidiomycota,3VGB3@5234|Tremellales	4751|Fungi	Z	May act as a negative regulator of salt tolerance	NST1	GO:0005575,GO:0005622,GO:0005623,GO:0005737,GO:0006950,GO:0006970,GO:0008150,GO:0009628,GO:0009651,GO:0044424,GO:0044464,GO:0050896	ko:K14798	NA	NST1	OTHER
320627	By MS/MS	By MS/MS	By MS/MS	By MS/MS	By MS/MS	By MS/MS	By MS/MS	By MS/MS	By MS/MS	By MS/MS	By MS/MS	By MS/MS	1247800000	1193200000	1315400000	1190700000	1697200000	831860000	1447600000	1568000000	1462000000	1581200000	1699800000	1485400000	305390000	347030000	358770000	338290000	286690000	261350000	282020000	274770000	332150000	363980000	359640000	348930000	82508.K1VHT9	3.21e-206	611	COG0167@1|root,KOG1436@2759|Eukaryota,38BTB@33154|Opisthokonta,3NXFM@4751|Fungi,3UYIN@5204|Basidiomycota,3VDB5@5234|Tremellales	4751|Fungi	C	Dihydroorotate dehydrogenase, mitochondrial precursor	URA9	GO:0003674,GO:0003824,GO:0004152,GO:0005575,GO:0005622,GO:0005623,GO:0005737,GO:0005739,GO:0005740,GO:0005743,GO:0006139,GO:0006206,GO:0006207,GO:0006213,GO:0006220,GO:0006221,GO:0006222,GO:0006725,GO:0006753,GO:0006793,GO:0006796,GO:0006807,GO:0008150,GO:0008152,GO:0009058,GO:0009112,GO:0009116,GO:0009117,GO:0009119,GO:0009123,GO:0009124,GO:0009129,GO:0009130,GO:0009156,GO:0009161,GO:0009163,GO:…	ko:K00226,ko:K00254	ko00240,ko01100,map00240,map01100	DHO_dh	OTHER
321989	By MS/MS	By MS/MS	By MS/MS	By MS/MS	By MS/MS	By MS/MS	By MS/MS	By MS/MS	By MS/MS	By MS/MS	By MS/MS	By MS/MS	593330000	563860000	371120000	347960000	366100000	181410000	434370000	294420000	687230000	749240000	584930000	670860000	177940000	161920000	178580000	174470000	90112000	84792000	105580000	80753000	200990000	200770000	223800000	233850000	82508.K1VJ84	5.61e-16	75.5	KOG3801@1|root,KOG3801@2759|Eukaryota,3A8KB@33154|Opisthokonta,3P711@4751|Fungi,3V27J@5204|Basidiomycota,3VG6S@5234|Tremellales	4751|Fungi	A	mitochondrion protein	NA	GO:0005575,GO:0005622,GO:0005623,GO:0005737,GO:0005739,GO:0005740,GO:0005743,GO:0005759,GO:0005829,GO:0006790,GO:0008150,GO:0008152,GO:0009987,GO:0016020,GO:0016043,GO:0016226,GO:0019866,GO:0019898,GO:0022607,GO:0031090,GO:0031163,GO:0031312,GO:0031314,GO:0031966,GO:0031967,GO:0031974,GO:0031975,GO:0032991,GO:0043226,GO:0043227,GO:0043229,GO:0043231,GO:0043233,GO:0044085,GO:0044237,GO:0044422,GO:…	ko:K22069	NA	Complex1_LYR	OTHER
322320	By MS/MS	By MS/MS	By MS/MS	By MS/MS	By MS/MS	By MS/MS	By MS/MS	By MS/MS	By MS/MS	By MS/MS	By MS/MS	By MS/MS	5319400000	3539900000	3863800000	3652200000	6267700000	4073600000	6496600000	7333200000	4011000000	4248600000	4134500000	3895400000	4479000000	3243700000	4206100000	4051200000	4130000000	3506100000	4669100000	4698100000	3816100000	3336600000	2748700000	3402600000	82508.K1V2G3	1.6e-34	120	COG5648@1|root,KOG0381@2759|Eukaryota,3A6QT@33154|Opisthokonta,3P5CR@4751|Fungi,3V1M3@5204|Basidiomycota,3VG2Q@5234|Tremellales	4751|Fungi	K	HMG-box domain	NHP6	GO:0000228,GO:0000785,GO:0000790,GO:0001192,GO:0001195,GO:0003674,GO:0003676,GO:0003677,GO:0003682,GO:0005488,GO:0005575,GO:0005622,GO:0005623,GO:0005634,GO:0005694,GO:0006139,GO:0006259,GO:0006281,GO:0006298,GO:0006323,GO:0006325,GO:0006333,GO:0006334,GO:0006338,GO:0006351,GO:0006352,GO:0006354,GO:0006355,GO:0006357,GO:0006366,GO:0006367,GO:0006383,GO:0006384,GO:0006385,GO:0006725,GO:0006807,GO:…	NA	NA	HMG_box	OTHER
322326	By MS/MS	By matching	By matching	NA	By matching	By MS/MS	By MS/MS	By matching	By matching	By matching	By matching	By matching	28135000	32425000	30981000	0	52698000	25199000	47574000	45640000	34554000	43769000	45454000	34020000	0	0	0	0	0	0	0	0	0	0	0	0	82508.K1VC11	7.88e-192	562	COG0666@1|root,KOG2319@2759|Eukaryota,38JP8@33154|Opisthokonta,3NY9E@4751|Fungi,3UYIA@5204|Basidiomycota,3VER6@5234|Tremellales	4751|Fungi	U	Domain present in VPS9	vps901	GO:0000011,GO:0003674,GO:0005085,GO:0005488,GO:0005515,GO:0005575,GO:0005622,GO:0005623,GO:0005737,GO:0005829,GO:0006605,GO:0006623,GO:0006810,GO:0006886,GO:0006892,GO:0006895,GO:0006996,GO:0007033,GO:0007034,GO:0008104,GO:0008150,GO:0009987,GO:0015031,GO:0015833,GO:0016043,GO:0016192,GO:0016197,GO:0016482,GO:0019899,GO:0032182,GO:0032509,GO:0032511,GO:0033036,GO:0033365,GO:0034613,GO:0036010,GO:…	ko:K20131	NA	CUE,VPS9	OTHER
322770	By matching	By MS/MS	By matching	By matching	By MS/MS	By MS/MS	By MS/MS	By MS/MS	By matching	By matching	By MS/MS	By MS/MS	106140000	59869000	75065000	78245000	4388300000	4164900000	4271800000	4004800000	32964000	24320000	179300000	283600000	30594000	0	0	24316000	1651700000	1927900000	1634400000	1357200000	0	0	38135000	127640000	5286.M7XM82	1.71e-21	87	COG2058@1|root,KOG1762@2759|Eukaryota,3A5NZ@33154|Opisthokonta,3P5HS@4751|Fungi,3V24P@5204|Basidiomycota,2YETA@29000|Pucciniomycotina	4751|Fungi	J	60s Acidic ribosomal protein	NA	GO:0001932,GO:0001934,GO:0002181,GO:0002182,GO:0003674,GO:0003735,GO:0005198,GO:0005575,GO:0005622,GO:0005623,GO:0005737,GO:0005829,GO:0005840,GO:0006412,GO:0006414,GO:0006518,GO:0006807,GO:0008047,GO:0008150,GO:0008152,GO:0009058,GO:0009059,GO:0009893,GO:0009987,GO:0010467,GO:0010562,GO:0010604,GO:0015934,GO:0019207,GO:0019209,GO:0019220,GO:0019222,GO:0019538,GO:0019887,GO:0022625,GO:0022626,GO:…	ko:K02942	ko03010,map03010	Ribosomal_60s	OTHER
323476	By matching	By MS/MS	By matching	By MS/MS	By MS/MS	By MS/MS	By MS/MS	By MS/MS	NA	NA	By MS/MS	By matching	12395000	69211000	91228000	84708000	3168700000	3404100000	3375300000	4310600000	0	0	91955000	59124000	0	17134000	20047000	25910000	238690000	2009100000	924860000	1271800000	0	0	17175000	0	82508.K1VI69	6.26e-23	93.6	2DZPU@1|root,2S76S@2759|Eukaryota,3A8F4@33154|Opisthokonta,3P718@4751|Fungi,3V268@5204|Basidiomycota,3VG5K@5234|Tremellales	4751|Fungi	S	Protein of unknown function (DUF3759)	NA	NA	NA	NA	DUF3759	OTHER
324673	By MS/MS	By MS/MS	By MS/MS	By MS/MS	By MS/MS	By MS/MS	By MS/MS	By MS/MS	By MS/MS	By MS/MS	By MS/MS	By MS/MS	1830200000	2024800000	1765400000	1627900000	3352600000	3026300000	3127300000	3891100000	1856600000	1936100000	2104100000	2804100000	812130000	887780000	664130000	684150000	827230000	975440000	820040000	1017900000	715120000	720910000	748770000	934080000	1048829.XP_002795760.1	1.05e-70	217	COG5171@1|root,KOG0864@2759|Eukaryota,38EUB@33154|Opisthokonta,3NYZB@4751|Fungi,3QNTH@4890|Ascomycota,20D2B@147545|Eurotiomycetes,3AZQZ@33183|Onygenales,3FNPK@34383|Onygenales incertae sedis	4751|Fungi	U	Ran-specific GTPase-activating protein	sbp1	GO:0000082,GO:0000166,GO:0000226,GO:0000278,GO:0001882,GO:0001883,GO:0003674,GO:0005488,GO:0005515,GO:0005525,GO:0005575,GO:0005622,GO:0005623,GO:0005634,GO:0005737,GO:0005829,GO:0006403,GO:0006405,GO:0006508,GO:0006511,GO:0006606,GO:0006807,GO:0006810,GO:0006886,GO:0006913,GO:0006996,GO:0007010,GO:0007017,GO:0007049,GO:0007051,GO:0007154,GO:0007165,GO:0007264,GO:0007265,GO:0008104,GO:0008150,GO:…	ko:K15306	ko05166,ko05203,map05166,map05203	Ran_BP1	OTHER
324716	By matching	By MS/MS	By matching	By MS/MS	NA	By MS/MS	NA	NA	By matching	By MS/MS	By MS/MS	By MS/MS	13834000	16131000	38303000	70358000	0	12671000	0	0	37324000	27114000	64535000	66488000	0	0	0	50629000	0	0	0	0	0	0	34658000	37454000	5217.XP_007004532.1	2.14e-96	289	COG1028@1|root,KOG0725@2759|Eukaryota,3A1B2@33154|Opisthokonta,3Q503@4751|Fungi,3VCAT@5204|Basidiomycota,3VF2J@5234|Tremellales	4751|Fungi	Q	Belongs to the short-chain dehydrogenases reductases (SDR) family	NA	NA	NA	NA	adh_short	OTHER
324787	By MS/MS	By MS/MS	By MS/MS	By MS/MS	By MS/MS	By MS/MS	By MS/MS	By MS/MS	By MS/MS	By MS/MS	By MS/MS	By MS/MS	2850700000	2766500000	4908900000	3727300000	5144000000	4699600000	4410900000	5323600000	4416500000	4014900000	4674800000	4061800000	1686100000	2189700000	2684300000	2354900000	1993600000	1972600000	1881100000	2104200000	2532400000	2146700000	2281900000	2033200000	82508.K1WJ14	3.46e-71	217	KOG4075@1|root,KOG4075@2759|Eukaryota,3A1S5@33154|Opisthokonta,3P5Q4@4751|Fungi,3V1N9@5204|Basidiomycota,3VFP8@5234|Tremellales	4751|Fungi	C	Cytochrome c oxidase subunit IV	cox5	GO:0003674,GO:0003824,GO:0004129,GO:0005215,GO:0005575,GO:0005622,GO:0005623,GO:0005737,GO:0005739,GO:0005740,GO:0005743,GO:0005746,GO:0005751,GO:0006091,GO:0006119,GO:0006123,GO:0006139,GO:0006163,GO:0006725,GO:0006753,GO:0006793,GO:0006796,GO:0006807,GO:0006810,GO:0006811,GO:0006812,GO:0008150,GO:0008152,GO:0008324,GO:0009055,GO:0009060,GO:0009117,GO:0009123,GO:0009126,GO:0009141,GO:0009144,GO:…	ko:K02263	ko00190,ko01100,ko04260,ko04714,ko04932,ko05010,ko05012,ko05016,map00190,map01100,map04260,map04714,map04932,map05010,map05012,map05016	COX4	OTHER
325246	By MS/MS	By matching	By matching	By MS/MS	By MS/MS	By MS/MS	By MS/MS	By matching	By MS/MS	By MS/MS	By matching	By MS/MS	17358000	54429000	129250000	129580000	239070000	125350000	195290000	200820000	148450000	92588000	116530000	174900000	0	0	0	0	0	0	0	0	0	0	0	0	82508.K1WTF6	4.77e-175	523	KOG3689@1|root,KOG3689@2759|Eukaryota,38EXP@33154|Opisthokonta,3NU2P@4751|Fungi,3V0ER@5204|Basidiomycota,3VE5M@5234|Tremellales	4751|Fungi	T	3'5'-cyclic nucleotide phosphodiesterase	PDE2	NA	ko:K01120	ko00230,map00230	PDEase_I	OTHER
325384	By MS/MS	By MS/MS	By MS/MS	By MS/MS	By MS/MS	By MS/MS	By MS/MS	By MS/MS	By MS/MS	By MS/MS	By MS/MS	By MS/MS	240220000	247300000	262770000	287470000	628600000	486640000	629240000	686000000	167020000	138130000	175450000	157690000	116040000	134920000	119470000	130810000	166870000	141800000	169000000	162910000	85190000	68646000	71767000	76311000	82508.K1VN21	1.1e-199	574	COG0318@1|root,KOG1176@2759|Eukaryota,38D90@33154|Opisthokonta,3NWZC@4751|Fungi,3UY3B@5204|Basidiomycota,3VD2K@5234|Tremellales	4751|Fungi	I	AMP-binding enzyme C-terminal domain	NA	NA	NA	NA	AMP-binding,AMP-binding_C	OTHER
325387	By MS/MS	By MS/MS	By MS/MS	By MS/MS	By MS/MS	By MS/MS	By MS/MS	By MS/MS	By MS/MS	By MS/MS	By MS/MS	By MS/MS	874380000	1141900000	791140000	828550000	1320300000	1122400000	1657900000	1774500000	898900000	925700000	1014500000	782710000	330840000	348680000	202020000	256550000	343950000	309520000	400210000	349220000	315500000	383300000	275660000	302280000	82508.K1VSI3	3.86e-146	444	COG1012@1|root,KOG2450@2759|Eukaryota,38X5S@33154|Opisthokonta,3NV07@4751|Fungi,3UZ3F@5204|Basidiomycota,3VGVV@5234|Tremellales	4751|Fungi	E	Belongs to the aldehyde dehydrogenase family	NA	NA	NA	NA	Aldedh	OTHER
325746	By matching	NA	NA	NA	By matching	By MS/MS	By MS/MS	By matching	By matching	By matching	By matching	By matching	57012000	0	0	0	41350000	39631000	65558000	65908000	56372000	63882000	57004000	79730000	0	0	0	0	0	0	0	0	0	0	0	0	552467.XP_003191103.1	3.56e-53	172	COG3526@1|root,2S6UH@2759|Eukaryota,3A6V6@33154|Opisthokonta,3P55U@4751|Fungi,3V1SB@5204|Basidiomycota,3VH3Y@5234|Tremellales	4751|Fungi	O	Rdx family	NA	NA	ko:K07401	NA	Rdx	OTHER
325754	By MS/MS	By MS/MS	By MS/MS	By MS/MS	By MS/MS	By MS/MS	By MS/MS	By MS/MS	By MS/MS	By MS/MS	By MS/MS	By MS/MS	557110000	591060000	605710000	490010000	795890000	437260000	834740000	663880000	627630000	655670000	678660000	609390000	127530000	130390000	130060000	118190000	111620000	93965000	109400000	96511000	124760000	118160000	113820000	101860000	5207.AAW43897	0	1524	COG5219@1|root,KOG0803@2759|Eukaryota,38G7I@33154|Opisthokonta,3NVQV@4751|Fungi,3UZ3H@5204|Basidiomycota,3VGNX@5234|Tremellales	4751|Fungi	O	Ring finger domain	NA	GO:0003674,GO:0003824,GO:0004842,GO:0005488,GO:0005575,GO:0005622,GO:0005623,GO:0005634,GO:0006325,GO:0006342,GO:0006348,GO:0006355,GO:0006412,GO:0006414,GO:0006417,GO:0006464,GO:0006508,GO:0006511,GO:0006518,GO:0006807,GO:0006996,GO:0008150,GO:0008152,GO:0008270,GO:0009056,GO:0009057,GO:0009058,GO:0009059,GO:0009889,GO:0009890,GO:0009892,GO:0009987,GO:0010467,GO:0010468,GO:0010498,GO:0010556,GO:…	ko:K00507,ko:K22377	ko01040,ko01212,ko03320,ko04152,ko04212,map01040,map01212,map03320,map04152,map04212	zf-RING_2	OTHER
326044	By MS/MS	By MS/MS	By MS/MS	By MS/MS	By MS/MS	By MS/MS	By MS/MS	By MS/MS	By MS/MS	By MS/MS	By MS/MS	By MS/MS	667380000	717240000	706290000	740120000	944480000	842390000	832860000	983070000	866930000	840100000	846820000	936980000	211320000	270510000	280930000	329190000	188920000	256400000	208770000	209620000	285830000	240680000	225720000	302470000	5207.AAW42374	1.68e-133	391	COG0448@1|root,KOG1504@2759|Eukaryota,38CHJ@33154|Opisthokonta,3NVQB@4751|Fungi,3UZ41@5204|Basidiomycota,3VDGJ@5234|Tremellales	4751|Fungi	E	Aspartate/ornithine carbamoyltransferase, Asp/Orn binding domain	ARG3	GO:0000050,GO:0003674,GO:0003824,GO:0004585,GO:0005575,GO:0005622,GO:0005623,GO:0005737,GO:0005739,GO:0005759,GO:0005829,GO:0006082,GO:0006520,GO:0006525,GO:0006526,GO:0006591,GO:0006807,GO:0008150,GO:0008152,GO:0008652,GO:0009058,GO:0009064,GO:0009084,GO:0009987,GO:0016053,GO:0016740,GO:0016741,GO:0016743,GO:0019627,GO:0019752,GO:0031974,GO:0034641,GO:0042450,GO:0043226,GO:0043227,GO:0043229,GO:…	ko:K00611	ko00220,ko01100,ko01110,ko01130,ko01230,map00220,map01100,map01110,map01130,map01230	OTCace,OTCace_N	OTHER
326378	By MS/MS	By MS/MS	By MS/MS	By MS/MS	By MS/MS	By MS/MS	By MS/MS	By MS/MS	By MS/MS	By MS/MS	By MS/MS	By MS/MS	1876300000	1510700000	1615200000	1518300000	1883300000	1195000000	2066900000	2113300000	1753400000	2057500000	2273000000	1805100000	733930000	751410000	544310000	815850000	472050000	595540000	535010000	458340000	660670000	630830000	655510000	576050000	82508.K1VCU4	2e-116	356	COG5648@1|root,KOG0381@2759|Eukaryota,3A3AF@33154|Opisthokonta,3P2SE@4751|Fungi,3V121@5204|Basidiomycota,3VGBW@5234|Tremellales	4751|Fungi	B	HMG-box domain	NA	NA	ko:K11296	NA	HMG_box,HMG_box_2	OTHER
327404	By matching	By matching	NA	By matching	By matching	NA	By matching	By MS/MS	By matching	By matching	NA	NA	11794000	16361000	0	14061000	23929000	0	23860000	28941000	5994300	9613000	0	0	0	0	0	0	0	0	0	0	0	0	0	0	5207.AAW43301	1.57e-149	438	COG2930@1|root,KOG1843@2759|Eukaryota,39VGG@33154|Opisthokonta,3NY7A@4751|Fungi,3UZ7P@5204|Basidiomycota,3VFDN@5234|Tremellales	4751|Fungi	S	Las17-binding protein actin regulator	NA	NA	NA	NA	Ysc84	OTHER
327513	By MS/MS	By MS/MS	By MS/MS	By MS/MS	By MS/MS	By MS/MS	By MS/MS	By MS/MS	By MS/MS	By MS/MS	By MS/MS	By MS/MS	795150000	1062700000	868400000	697790000	2106000000	2169100000	2121700000	2394800000	1024700000	1006000000	1301900000	490410000	449020000	593920000	435500000	404950000	672430000	1005300000	736490000	773430000	543860000	494810000	541090000	591450000	5217.XP_007004039.1	5.91e-68	209	COG0355@1|root,KOG1758@2759|Eukaryota,3A5WF@33154|Opisthokonta,3P4C9@4751|Fungi,3V0Y6@5204|Basidiomycota,3VFVQ@5234|Tremellales	4751|Fungi	C	ATP synthase, Delta/Epsilon chain, beta-sandwich domain	ATP16	GO:0000275,GO:0005575,GO:0005622,GO:0005623,GO:0005737,GO:0005739,GO:0005740,GO:0005743,GO:0005753,GO:0005756,GO:0006091,GO:0006119,GO:0006139,GO:0006163,GO:0006164,GO:0006725,GO:0006753,GO:0006754,GO:0006793,GO:0006796,GO:0006807,GO:0006810,GO:0006811,GO:0006812,GO:0006839,GO:0008150,GO:0008152,GO:0009058,GO:0009117,GO:0009123,GO:0009124,GO:0009126,GO:0009127,GO:0009141,GO:0009142,GO:0009144,GO:…	ko:K02134	ko00190,ko01100,ko04714,ko05010,ko05012,ko05016,map00190,map01100,map04714,map05010,map05012,map05016	ATP-synt_DE_N	OTHER
327728	By matching	By MS/MS	By matching	By matching	By MS/MS	By MS/MS	By MS/MS	By MS/MS	NA	By MS/MS	By matching	By matching	24115000	14281000	18472000	13427000	573920000	452800000	496470000	28117000	0	12490000	19868000	15218000	0	0	0	0	374960000	403530000	346210000	0	0	0	0	0	5217.XP_007007485.1	0	904	KOG3758@1|root,KOG3758@2759|Eukaryota,38DBZ@33154|Opisthokonta,3NV7G@4751|Fungi,3UZK3@5204|Basidiomycota,3VE81@5234|Tremellales	4751|Fungi	U	Conserved oligomeric complex COG6	COG6	GO:0005575,GO:0005622,GO:0005623,GO:0005737,GO:0005794,GO:0006810,GO:0006886,GO:0006891,GO:0008104,GO:0008150,GO:0009987,GO:0012505,GO:0015031,GO:0015833,GO:0016192,GO:0017119,GO:0032258,GO:0032991,GO:0033036,GO:0033365,GO:0034613,GO:0042886,GO:0043226,GO:0043227,GO:0043229,GO:0043231,GO:0044422,GO:0044424,GO:0044431,GO:0044444,GO:0044446,GO:0044464,GO:0045184,GO:0046907,GO:0048193,GO:0051179,GO:…	ko:K20293	NA	COG6	OTHER
328077	By MS/MS	By MS/MS	By MS/MS	By MS/MS	By MS/MS	By MS/MS	By matching	By MS/MS	By MS/MS	By MS/MS	By MS/MS	By MS/MS	2170200000	1228100000	1557800000	1549400000	517790000	458680000	1708700	2023600	207440000	4146400	2421200000	8041800	1069100000	702130000	818040000	868760000	0	0	0	0	1157700000	650980000	1298000000	840610000	40483.S8E8S0	1.67e-47	166	COG5524@1|root,2RWTP@2759|Eukaryota,39QVV@33154|Opisthokonta,3Q6WF@4751|Fungi,3V74T@5204|Basidiomycota,225SG@155619|Agaricomycetes,3H4TA@355688|Agaricomycetes incertae sedis	4751|Fungi	S	Bacteriorhodopsin-like protein	NA	GO:0005575,GO:0005622,GO:0005623,GO:0005737,GO:0005783,GO:0005886,GO:0008150,GO:0012505,GO:0016020,GO:0016021,GO:0031224,GO:0032780,GO:0043086,GO:0043226,GO:0043227,GO:0043229,GO:0043231,GO:0043462,GO:0044092,GO:0044424,GO:0044425,GO:0044444,GO:0044464,GO:0050790,GO:0051336,GO:0051346,GO:0065007,GO:0065009,GO:0071944	NA	NA	Bac_rhodopsin	OTHER
328252	By matching	NA	NA	NA	By MS/MS	By MS/MS	By MS/MS	By matching	NA	By matching	NA	NA	6583700	0	0	0	52462000	52046000	52535000	59152000	0	6480700	0	0	0	0	0	0	24471000	26019000	23862000	24007000	0	0	0	0	552467.XP_003192994.1	1.57e-165	475	299WK@1|root,2RGZ1@2759|Eukaryota,39JPT@33154|Opisthokonta,3Q41Q@4751|Fungi,3V02D@5204|Basidiomycota,3VHJC@5234|Tremellales	4751|Fungi	G	glycoside hydrolase family 16 protein	NA	NA	NA	NA	Glyco_hydro_16	OTHER
328776	By matching	By matching	By matching	By MS/MS	By MS/MS	NA	By MS/MS	By MS/MS	By matching	By matching	By MS/MS	By MS/MS	18103000	11790000	15002000	19513000	21369000	0	22296000	26386000	21188000	18480000	21292000	14554000	0	0	0	0	0	0	0	0	0	0	0	0	82508.K1W2D2	1.02e-147	436	COG5575@1|root,KOG2928@2759|Eukaryota,38I1D@33154|Opisthokonta,3NXCD@4751|Fungi,3V1DQ@5204|Basidiomycota,3VDYC@5234|Tremellales	4751|Fungi	L	Origin recognition complex subunit 2	ORC2	GO:0000228,GO:0000278,GO:0000785,GO:0000790,GO:0000808,GO:0003674,GO:0003676,GO:0003677,GO:0003682,GO:0003688,GO:0003690,GO:0005488,GO:0005575,GO:0005622,GO:0005623,GO:0005634,GO:0005654,GO:0005656,GO:0005657,GO:0005664,GO:0005694,GO:0006139,GO:0006259,GO:0006260,GO:0006261,GO:0006267,GO:0006270,GO:0006325,GO:0006342,GO:0006348,GO:0006355,GO:0006464,GO:0006479,GO:0006725,GO:0006807,GO:0006996,GO:…	ko:K02604,ko:K06199	ko04110,ko04111,ko04113,map04110,map04111,map04113	ORC2	OTHER
328828	NA	By matching	NA	By matching	By MS/MS	By MS/MS	By matching	By matching	By matching	By matching	By matching	By matching	0	2068800	0	6223000	6519100	1506400	6357800	5123700	4763800	7221700	7587000	3567600	0	0	0	0	0	0	0	0	0	0	0	0	82508.K1VS83	1.47e-86	263	KOG3152@1|root,KOG3152@2759|Eukaryota,39U4I@33154|Opisthokonta,3NZ3E@4751|Fungi,3V14Y@5204|Basidiomycota,3VF00@5234|Tremellales	4751|Fungi	A	pre-rrna-processing protein esf2	ESF2	GO:0000028,GO:0000447,GO:0000460,GO:0000462,GO:0000466,GO:0000469,GO:0000472,GO:0000478,GO:0000479,GO:0000480,GO:0000966,GO:0000967,GO:0001671,GO:0003674,GO:0003676,GO:0003723,GO:0005488,GO:0005575,GO:0005622,GO:0005623,GO:0005634,GO:0005730,GO:0005737,GO:0006139,GO:0006364,GO:0006396,GO:0006725,GO:0006807,GO:0006996,GO:0008047,GO:0008150,GO:0008152,GO:0009987,GO:0010467,GO:0016043,GO:0016070,GO:…	ko:K14785	NA	RRM_1	OTHER
329105	By matching	By matching	By matching	By MS/MS	By MS/MS	By MS/MS	By MS/MS	By MS/MS	By MS/MS	By MS/MS	By matching	By MS/MS	75326000	36090000	49552000	32616000	138030000	90646000	72319000	123710000	38470000	42581000	77009000	53616000	25748000	26073000	28506000	24978000	34860000	30171000	31174000	27743000	25861000	25873000	29226000	29370000	82508.K1V4V3	1.45e-104	307	COG2941@1|root,KOG4061@2759|Eukaryota,38H5U@33154|Opisthokonta,3NY4E@4751|Fungi,3V0HC@5204|Basidiomycota,3VEXY@5234|Tremellales	4751|Fungi	Q	Catalyzes the hydroxylation of 2-polyprenyl-3-methyl-6- methoxy-1,4-benzoquinol (DMQH2) during ubiquinone biosynthesis. Has also a structural role in the COQ enzyme complex, stabilizing other COQ polypeptides	COQ7	GO:0003674,GO:0003824,GO:0004497,GO:0005575,GO:0005622,GO:0005623,GO:0005737,GO:0005739,GO:0005740,GO:0005743,GO:0006732,GO:0006733,GO:0006743,GO:0006744,GO:0008150,GO:0008152,GO:0008682,GO:0009058,GO:0009108,GO:0009987,GO:0016020,GO:0016491,GO:0019866,GO:0031090,GO:0031966,GO:0031967,GO:0031975,GO:0042180,GO:0042181,GO:0043226,GO:0043227,GO:0043229,GO:0043231,GO:0044237,GO:0044249,GO:0044281,GO:…	ko:K06134	ko00130,ko01100,ko01110,map00130,map01100,map01110	COQ7	OTHER
330729	NA	NA	NA	NA	By MS/MS	By MS/MS	By MS/MS	By MS/MS	NA	NA	NA	NA	0	0	0	0	156530000	113140000	135690000	117350000	0	0	0	0	0	0	0	0	70859000	66944000	61870000	49305000	0	0	0	0	97096.XP_007797510.1	3.53e-69	221	29X3U@1|root,2RXR0@2759|Eukaryota,3A0Y7@33154|Opisthokonta,3P22G@4751|Fungi,3R10M@4890|Ascomycota,217GG@147550|Sordariomycetes	4751|Fungi	O	Glycosyl hydrolase catalytic core	NA	NA	NA	NA	Glyco_hydro_cc	OTHER
330775	By matching	By matching	By matching	By matching	By MS/MS	By MS/MS	By MS/MS	By MS/MS	By MS/MS	By matching	By matching	By MS/MS	123180000	106960000	133580000	94052000	1011700000	596630000	975530000	939670000	84360000	88619000	150020000	305110000	0	0	0	0	0	0	0	0	0	0	0	0	82508.K1WNR1	2.17e-42	144	KOG4111@1|root,KOG4111@2759|Eukaryota,3A6BX@33154|Opisthokonta,3P6N1@4751|Fungi,3V2FD@5204|Basidiomycota,3VFWN@5234|Tremellales	4751|Fungi	U	Mitochondrial import receptor subunit Tom22	tom22	GO:0005575,GO:0005622,GO:0005623,GO:0005737,GO:0005739,GO:0005740,GO:0005741,GO:0005742,GO:0006605,GO:0006626,GO:0006810,GO:0006839,GO:0006886,GO:0006996,GO:0007005,GO:0007006,GO:0008104,GO:0008150,GO:0009987,GO:0015031,GO:0015833,GO:0016020,GO:0016021,GO:0016043,GO:0017038,GO:0019867,GO:0030150,GO:0031090,GO:0031224,GO:0031300,GO:0031301,GO:0031306,GO:0031307,GO:0031966,GO:0031967,GO:0031968,GO:…	ko:K17769	NA	Tom22	OTHER
330783	By MS/MS	By matching	By MS/MS	By matching	NA	NA	By matching	By matching	By MS/MS	By matching	By MS/MS	By matching	8007800	3413800	24118000	8745300	0	0	9407500	13970000	10873000	7920100	13386000	17671000	0	0	0	0	0	0	0	0	0	0	0	0	5217.XP_007006353.1	1.03e-287	811	COG5535@1|root,KOG2179@2759|Eukaryota,38BBG@33154|Opisthokonta,3NW5A@4751|Fungi,3UZMH@5204|Basidiomycota,3VD3J@5234|Tremellales	4751|Fungi	L	Rad4 beta-hairpin domain 2	NA	GO:0000109,GO:0000111,GO:0000122,GO:0003674,GO:0003676,GO:0003677,GO:0003684,GO:0003697,GO:0005488,GO:0005575,GO:0005622,GO:0005623,GO:0005634,GO:0005737,GO:0005829,GO:0006139,GO:0006259,GO:0006265,GO:0006281,GO:0006289,GO:0006298,GO:0006355,GO:0006357,GO:0006508,GO:0006511,GO:0006725,GO:0006807,GO:0006950,GO:0006974,GO:0006996,GO:0008150,GO:0008152,GO:0009056,GO:0009057,GO:0009889,GO:0009890,GO:…	ko:K10838	ko03420,map03420	BHD_1,BHD_2,BHD_3,Rad4	OTHER
331343	By MS/MS	By MS/MS	By matching	By MS/MS	By MS/MS	By MS/MS	By MS/MS	By MS/MS	By MS/MS	By MS/MS	By MS/MS	By MS/MS	86903000	116440000	23604000	89356000	99218000	80832000	102650000	100750000	97742000	119600000	99996000	105160000	0	63756000	0	0	48191000	51249000	52690000	49071000	62568000	71575000	0	62140000	82508.K1VT25	1.77e-140	412	2CEEQ@1|root,2S0I7@2759|Eukaryota,3A3B4@33154|Opisthokonta,3P317@4751|Fungi,3V0TJ@5204|Basidiomycota,3VD3W@5234|Tremellales	4751|Fungi	-	-	NA	NA	NA	NA	-	OTHER
331377	By MS/MS	By MS/MS	By MS/MS	By MS/MS	By MS/MS	By matching	By MS/MS	By MS/MS	By MS/MS	By MS/MS	By MS/MS	By MS/MS	111830000	222470000	324170000	331340000	195090000	127540000	371630000	204500000	226650000	288070000	378620000	132960000	95976000	112510000	138350000	119830000	94069000	0	89098000	105320000	100540000	84283000	95193000	161950000	82508.K1VSM4	6.07e-67	209	KOG4747@1|root,KOG4747@2759|Eukaryota,3A5QI@33154|Opisthokonta,3P5HM@4751|Fungi,3V1NQ@5204|Basidiomycota,3VFMB@5234|Tremellales	4751|Fungi	T	Histidine Phosphotransfer domain	YPD1	GO:0000160,GO:0001932,GO:0001934,GO:0003674,GO:0003824,GO:0004672,GO:0005488,GO:0005515,GO:0005575,GO:0005622,GO:0005623,GO:0005634,GO:0005737,GO:0005829,GO:0006464,GO:0006468,GO:0006793,GO:0006796,GO:0006807,GO:0006950,GO:0006970,GO:0006979,GO:0007154,GO:0007165,GO:0007231,GO:0007234,GO:0007346,GO:0008150,GO:0008152,GO:0009628,GO:0009893,GO:0009927,GO:0009966,GO:0009967,GO:0009987,GO:0010389,GO:…	ko:K11232	ko02020,ko04011,map02020,map04011	Hpt	OTHER
332498	By matching	By matching	By matching	By MS/MS	By matching	By MS/MS	By MS/MS	By matching	By matching	By matching	By matching	By matching	130910000	33667000	178740000	229750000	284070000	648250000	216030000	393550000	81719000	82832000	136790000	134400000	63239000	0	72361000	186040000	87086000	481870000	75183000	101040000	48951000	45840000	56193000	64651000	552467.XP_003195007.1	9.57e-56	176	COG0011@1|root,2S45I@2759|Eukaryota,3A3N1@33154|Opisthokonta,3Q15W@4751|Fungi,3VA5P@5204|Basidiomycota,3VG5D@5234|Tremellales	4751|Fungi	S	Thiamine-binding protein	NA	NA	NA	NA	Thiamine_BP	OTHER
332565	By MS/MS	By MS/MS	By MS/MS	By MS/MS	By MS/MS	By MS/MS	By MS/MS	By MS/MS	By MS/MS	By MS/MS	By MS/MS	By MS/MS	192730000	249240000	143410000	172430000	450630000	405870000	382290000	459240000	213510000	243370000	242340000	202520000	101650000	132600000	79001000	118370000	172730000	187050000	146030000	155940000	133640000	138120000	120840000	109320000	82508.K1WTL6	9.1e-78	246	28PJ5@1|root,2QW7A@2759|Eukaryota,39TEF@33154|Opisthokonta,3NYIA@4751|Fungi,3V13S@5204|Basidiomycota,3VF8E@5234|Tremellales	4751|Fungi	U	Plasma membrane osmosensor that activates the high osmolarity glycerol (HOG) MAPK signaling pathway in response to high osmolarity	SHO1	GO:0000902,GO:0001402,GO:0001932,GO:0001934,GO:0003674,GO:0004888,GO:0005034,GO:0005078,GO:0005198,GO:0005488,GO:0005515,GO:0005575,GO:0005622,GO:0005623,GO:0005737,GO:0005783,GO:0005886,GO:0005933,GO:0005935,GO:0005937,GO:0006950,GO:0006970,GO:0006979,GO:0007154,GO:0007163,GO:0007165,GO:0007231,GO:0007232,GO:0008064,GO:0008150,GO:0009266,GO:0009268,GO:0009272,GO:0009408,GO:0009607,GO:0009628,GO:…	ko:K11246	ko04011,map04011	SH3_1,SH3_9	OTHER
332624	By MS/MS	By MS/MS	By MS/MS	By MS/MS	By MS/MS	By MS/MS	By MS/MS	By MS/MS	By MS/MS	By MS/MS	By MS/MS	By MS/MS	143810000	113390000	272400000	215760000	160390000	125550000	86435000	159210000	136070000	163730000	199950000	165140000	43236000	44509000	77957000	68965000	30715000	31763000	27246000	29043000	54848000	40925000	45293000	50736000	552467.XP_003192105.1	0	926	COG2234@1|root,KOG2195@2759|Eukaryota,38ERK@33154|Opisthokonta,3NUU3@4751|Fungi,3UZ3W@5204|Basidiomycota,3VE0S@5234|Tremellales	4751|Fungi	OP	Transferrin receptor-like dimerisation domain	VPS70	GO:0005575,GO:0005622,GO:0005623,GO:0005737,GO:0005783,GO:0006605,GO:0006623,GO:0006810,GO:0006886,GO:0007034,GO:0008104,GO:0008150,GO:0012505,GO:0015031,GO:0015833,GO:0033036,GO:0033365,GO:0034613,GO:0042886,GO:0043226,GO:0043227,GO:0043229,GO:0043231,GO:0044424,GO:0044444,GO:0044464,GO:0045184,GO:0046907,GO:0051179,GO:0051234,GO:0051641,GO:0051649,GO:0070727,GO:0071702,GO:0071705,GO:0072594,GO:…	ko:K01301	NA	PA,Peptidase_M28,TFR_dimer	OTHER
332652	NA	NA	NA	NA	By MS/MS	By matching	By matching	By MS/MS	NA	By matching	By matching	By matching	0	0	0	0	44738000	9141900	38148000	41488000	0	10413000	10334000	9636800	0	0	0	0	0	0	0	0	0	0	0	0	552467.XP_003192222.1	3.87e-38	130	COG0199@1|root,KOG1741@2759|Eukaryota,3A3IW@33154|Opisthokonta,3P4CP@4751|Fungi,3V1SI@5204|Basidiomycota,3VH2Z@5234|Tremellales	4751|Fungi	J	Ribosomal protein S14p/S29e	MRP2	GO:0000313,GO:0000314,GO:0003674,GO:0003735,GO:0005198,GO:0005575,GO:0005622,GO:0005623,GO:0005737,GO:0005739,GO:0005759,GO:0005761,GO:0005763,GO:0005840,GO:0006412,GO:0006518,GO:0006807,GO:0008150,GO:0008152,GO:0009058,GO:0009059,GO:0009987,GO:0010467,GO:0015935,GO:0019538,GO:0031974,GO:0032543,GO:0032991,GO:0034641,GO:0034645,GO:0043043,GO:0043170,GO:0043226,GO:0043227,GO:0043228,GO:0043229,GO:…	ko:K02954	ko03010,map03010	Ribosomal_S14	OTHER
332664	NA	NA	NA	NA	NA	By MS/MS	NA	NA	NA	By MS/MS	NA	NA	0	0	0	0	0	0	0	0	0	0	0	0	0	0	0	0	0	0	0	0	0	0	0	0	552467.XP_003192028.1	7.29e-174	499	COG0042@1|root,KOG2335@2759|Eukaryota,38FMD@33154|Opisthokonta,3NV32@4751|Fungi,3UYJS@5204|Basidiomycota,3VE76@5234|Tremellales	4751|Fungi	J	Dihydrouridine synthase (Dus)	DUS4	GO:0002943,GO:0003674,GO:0003824,GO:0006139,GO:0006396,GO:0006399,GO:0006400,GO:0006725,GO:0006807,GO:0008033,GO:0008150,GO:0008152,GO:0009451,GO:0009987,GO:0010467,GO:0016070,GO:0016491,GO:0016627,GO:0017150,GO:0034470,GO:0034641,GO:0034660,GO:0043170,GO:0043412,GO:0044237,GO:0044238,GO:0046483,GO:0055114,GO:0071704,GO:0090304,GO:0140098,GO:0140101,GO:1901360	ko:K05545	NA	Dus	OTHER
332677	By MS/MS	By MS/MS	By MS/MS	By MS/MS	By MS/MS	By MS/MS	By MS/MS	By MS/MS	By MS/MS	By MS/MS	By MS/MS	By MS/MS	2261900000	2329700000	2505600000	2871700000	1871500000	2207800000	1984500000	2283100000	2744100000	2876400000	2838500000	2975900000	330290000	370690000	323250000	469310000	224360000	298590000	248900000	243980000	353380000	379120000	369460000	393420000	82508.K1VUQ3	0	1019	COG0129@1|root,KOG2448@2759|Eukaryota,38F28@33154|Opisthokonta,3NUBR@4751|Fungi,3UYUV@5204|Basidiomycota,3VEU4@5234|Tremellales	4751|Fungi	E	Dehydratase family	ILV3	GO:0003674,GO:0003824,GO:0004160,GO:0005575,GO:0005622,GO:0005623,GO:0005737,GO:0005739,GO:0006082,GO:0006520,GO:0006549,GO:0006551,GO:0006573,GO:0006807,GO:0008150,GO:0008152,GO:0008652,GO:0009058,GO:0009081,GO:0009082,GO:0009097,GO:0009099,GO:0009987,GO:0016053,GO:0016829,GO:0016835,GO:0016836,GO:0019752,GO:0043226,GO:0043227,GO:0043229,GO:0043231,GO:0043436,GO:0044237,GO:0044238,GO:0044249,GO:…	ko:K01687	ko00290,ko00770,ko01100,ko01110,ko01130,ko01210,ko01230,map00290,map00770,map01100,map01110,map01130,map01210,map01230	ILVD_EDD	OTHER
332705	By MS/MS	By MS/MS	By MS/MS	By matching	By MS/MS	By MS/MS	By MS/MS	By MS/MS	By matching	By matching	By MS/MS	By matching	129750000	236520000	144060000	120340000	150110000	23243000	225590000	163870000	25043000	119060000	591460000	54238000	41103000	80256000	36306000	35753000	38115000	0	47700000	28982000	14059000	18627000	141080000	19153000	82508.K1VS33	0	1131	COG1228@1|root,2QQ9Z@2759|Eukaryota,38FI9@33154|Opisthokonta,3NXY4@4751|Fungi,3UZI1@5204|Basidiomycota,3VDN5@5234|Tremellales	4751|Fungi	Q	Amidohydrolase family	NA	NA	NA	NA	Amidohydro_1,Amidohydro_3	OTHER
332776	By matching	NA	By matching	By matching	By matching	By MS/MS	By matching	By matching	By matching	By matching	By matching	NA	77611000	0	70795000	91354000	155260000	134790000	142990000	194700000	68824000	80606000	70897000	0	0	0	0	0	0	0	0	0	0	0	0	0	5217.XP_007004932.1	6.95e-93	280	COG0214@1|root,KOG3035@2759|Eukaryota,38V8A@33154|Opisthokonta,3Q0D5@4751|Fungi,3VA51@5204|Basidiomycota,3VH7P@5234|Tremellales	4751|Fungi	H	lipid catabolic process	NA	NA	NA	NA	-	OTHER
332863	By MS/MS	By MS/MS	By MS/MS	By MS/MS	By MS/MS	By MS/MS	By MS/MS	By MS/MS	By MS/MS	By MS/MS	By MS/MS	By MS/MS	1238200000	1205100000	1626300000	1401800000	1684200000	1227800000	1553000000	1644500000	1415800000	1509400000	1828900000	1556100000	183290000	174250000	185900000	188240000	152120000	152420000	155860000	134960000	188710000	188560000	174920000	191010000	82508.K1VBI7	0	1287	COG5308@1|root,KOG1900@2759|Eukaryota,38TTX@33154|Opisthokonta,3NU2K@4751|Fungi,3UYDG@5204|Basidiomycota,3VD1Z@5234|Tremellales	4751|Fungi	UY	Nup133 N terminal like	NUP170	GO:0000972,GO:0000973,GO:0003674,GO:0003676,GO:0003677,GO:0003682,GO:0003723,GO:0005198,GO:0005488,GO:0005575,GO:0005622,GO:0005623,GO:0005634,GO:0005635,GO:0005643,GO:0006323,GO:0006325,GO:0006333,GO:0006338,GO:0006342,GO:0006355,GO:0006403,GO:0006405,GO:0006407,GO:0006606,GO:0006611,GO:0006810,GO:0006886,GO:0006913,GO:0006996,GO:0006997,GO:0006999,GO:0007059,GO:0008104,GO:0008150,GO:0009889,GO:…	ko:K14312	ko03013,map03013	Nucleoporin_C,Nucleoporin_N	OTHER
332953	By matching	By matching	By MS/MS	By MS/MS	By MS/MS	By MS/MS	By MS/MS	By MS/MS	By MS/MS	By matching	By MS/MS	By MS/MS	91217000	124700000	113400000	87526000	124180000	158480000	155860000	137330000	138790000	121450000	141780000	128150000	46187000	77187000	66781000	70547000	51215000	77710000	64266000	61793000	83721000	71243000	88178000	69035000	82508.K1VVX6	0	1256	COG2453@1|root,KOG1716@2759|Eukaryota,38ET0@33154|Opisthokonta,3NWVR@4751|Fungi,3UYVT@5204|Basidiomycota,3VDUY@5234|Tremellales	4751|Fungi	V	Dual specificity phosphatase, catalytic domain	PPS1	GO:0000188,GO:0001932,GO:0001933,GO:0003674,GO:0003824,GO:0004721,GO:0006139,GO:0006259,GO:0006260,GO:0006261,GO:0006464,GO:0006469,GO:0006470,GO:0006725,GO:0006793,GO:0006796,GO:0006807,GO:0007049,GO:0008138,GO:0008150,GO:0008152,GO:0009058,GO:0009059,GO:0009892,GO:0009966,GO:0009968,GO:0009987,GO:0010563,GO:0010605,GO:0010646,GO:0010648,GO:0016311,GO:0016787,GO:0016788,GO:0016791,GO:0019220,GO:…	ko:K04459	ko04010,map04010	DSPc	OTHER
333114	By MS/MS	By matching	By MS/MS	By matching	By MS/MS	By MS/MS	By MS/MS	By MS/MS	By MS/MS	By MS/MS	By MS/MS	By MS/MS	209190000	132600000	146050000	110330000	142480000	73893000	95260000	111050000	118930000	161180000	140620000	168240000	135230000	0	113870000	0	72300000	0	0	0	97694000	83852000	0	0	552467.XP_003192095.1	7.79e-147	437	COG2234@1|root,KOG2195@2759|Eukaryota,39WQU@33154|Opisthokonta,3P09W@4751|Fungi,3V08G@5204|Basidiomycota,3VHJZ@5234|Tremellales	4751|Fungi	O	Peptidase family M28	NA	NA	NA	NA	Peptidase_M28	SP
333135	NA	NA	NA	By matching	By MS/MS	By matching	NA	NA	NA	NA	NA	NA	0	0	0	14967000	125820000	35897000	0	0	0	0	0	0	0	0	0	0	0	0	0	0	0	0	0	0	552467.XP_003193870.1	8.24e-205	588	COG0477@1|root,2QPK1@2759|Eukaryota,38CZY@33154|Opisthokonta,3NXDP@4751|Fungi,3UY80@5204|Basidiomycota,3VDDZ@5234|Tremellales	4751|Fungi	EGP	Sugar (and other) transporter	NA	NA	ko:K08178	NA	MFS_1,Sugar_tr	OTHER
333259	By MS/MS	By MS/MS	By MS/MS	By MS/MS	By MS/MS	By MS/MS	By MS/MS	By MS/MS	By MS/MS	By MS/MS	By MS/MS	By MS/MS	397490000	357660000	555970000	608130000	426540000	668190000	497740000	660430000	409130000	406330000	490800000	407070000	165820000	163510000	239080000	222820000	166310000	224800000	171540000	181110000	186130000	152980000	162230000	154590000	82508.K1V475	0	1679	COG1643@1|root,KOG0920@2759|Eukaryota,38B5Q@33154|Opisthokonta,3NWAW@4751|Fungi,3UYA0@5204|Basidiomycota,3VD5D@5234|Tremellales	4751|Fungi	A	Helicase associated domain (HA2) Add an annotation	NA	NA	ko:K02974,ko:K13184	ko03010,map03010	DEAD,HA2,Helicase_C,OB_NTP_bind,dsrm	OTHER
333264	By matching	By MS/MS	By MS/MS	By MS/MS	By MS/MS	By MS/MS	NA	NA	By MS/MS	By MS/MS	By MS/MS	By MS/MS	30434000	41575000	47256000	193100000	56896000	133400000	0	0	29798000	47084000	125040000	44538000	0	0	0	88953000	0	68560000	0	0	0	0	0	0	82508.K1VF18	2.47e-216	615	KOG1416@1|root,KOG1416@2759|Eukaryota,39QJG@33154|Opisthokonta,3NU3W@4751|Fungi,3UYE3@5204|Basidiomycota,3VGE9@5234|Tremellales	4751|Fungi	J	Gcd10p family	TRM6	GO:0000049,GO:0001510,GO:0003674,GO:0003676,GO:0003723,GO:0005488,GO:0005575,GO:0005622,GO:0005623,GO:0005634,GO:0005737,GO:0006139,GO:0006396,GO:0006399,GO:0006400,GO:0006725,GO:0006807,GO:0008033,GO:0008150,GO:0008152,GO:0009451,GO:0009987,GO:0010467,GO:0016070,GO:0030488,GO:0031515,GO:0032259,GO:0032991,GO:0034470,GO:0034641,GO:0034660,GO:0034708,GO:0043170,GO:0043226,GO:0043227,GO:0043229,GO:…	ko:K03256	NA	Gcd10p	OTHER
333270	By MS/MS	By MS/MS	By MS/MS	By MS/MS	By MS/MS	By MS/MS	By MS/MS	By MS/MS	By MS/MS	By MS/MS	By MS/MS	By MS/MS	271680000	367580000	319970000	238280000	503780000	420710000	599650000	516320000	307880000	312390000	296580000	357130000	124880000	191620000	121590000	135320000	192790000	186180000	221860000	169140000	155600000	140310000	140240000	130120000	82508.K1VY75	2.48e-296	823	COG1252@1|root,KOG2495@2759|Eukaryota,38G4F@33154|Opisthokonta,3NTXJ@4751|Fungi,3UZNH@5204|Basidiomycota,3VDBA@5234|Tremellales	4751|Fungi	C	Pyridine nucleotide-disulphide oxidoreductase	NDE1	GO:0001300,GO:0003674,GO:0003824,GO:0003954,GO:0005575,GO:0005622,GO:0005623,GO:0005737,GO:0005739,GO:0005740,GO:0005743,GO:0005975,GO:0005996,GO:0006006,GO:0006066,GO:0006067,GO:0006082,GO:0006090,GO:0006091,GO:0006113,GO:0006116,GO:0006119,GO:0006139,GO:0006163,GO:0006725,GO:0006732,GO:0006733,GO:0006734,GO:0006753,GO:0006793,GO:0006796,GO:0006807,GO:0007568,GO:0007569,GO:0008137,GO:0008150,GO:…	ko:K17871	NA	Pyr_redox_2	OTHER
333358	By MS/MS	By MS/MS	By MS/MS	By MS/MS	By MS/MS	By MS/MS	By MS/MS	By MS/MS	By MS/MS	By MS/MS	By MS/MS	By MS/MS	409960000	949740000	880330000	582460000	1355800000	1348400000	1262400000	1207800000	749810000	789130000	511140000	650460000	205490000	228160000	229020000	352920000	194320000	226380000	210910000	180830000	205680000	203550000	184940000	200270000	82508.K1V9F0	4.06e-237	696	COG0436@1|root,COG0667@1|root,KOG0257@2759|Eukaryota,KOG1575@2759|Eukaryota,38BZ0@33154|Opisthokonta,3NVUU@4751|Fungi,3UZQD@5204|Basidiomycota,3VD3G@5234|Tremellales	4751|Fungi	E	Aminotransferase class I and II	BNA3	GO:0003674,GO:0003824,GO:0005575,GO:0005622,GO:0005623,GO:0005737,GO:0005739,GO:0006082,GO:0006520,GO:0006725,GO:0006807,GO:0008150,GO:0008152,GO:0008483,GO:0009058,GO:0009987,GO:0016053,GO:0016212,GO:0016740,GO:0016769,GO:0017144,GO:0018130,GO:0019438,GO:0019752,GO:0032787,GO:0034275,GO:0034276,GO:0036137,GO:0042180,GO:0042537,GO:0043226,GO:0043227,GO:0043229,GO:0043231,GO:0043436,GO:0044237,GO:…	ko:K14264	ko00380,ko01100,map00380,map01100	Aminotran_1_2	OTHER
333369	By matching	By matching	By MS/MS	By matching	By MS/MS	By MS/MS	By matching	By MS/MS	NA	NA	By MS/MS	By matching	29356000	14599000	105150000	58667000	56111000	40193000	76610000	74558000	0	0	86236000	69845000	0	0	77957000	0	25428000	0	0	0	0	0	0	0	82508.K1VE60	4.66e-166	481	COG2008@1|root,KOG1368@2759|Eukaryota,38EQY@33154|Opisthokonta,3NWDM@4751|Fungi,3UZP4@5204|Basidiomycota,3VEJD@5234|Tremellales	4751|Fungi	E	Beta-eliminating lyase	NA	NA	ko:K01620	ko00260,ko01100,ko01110,ko01120,ko01130,ko01230,map00260,map01100,map01110,map01120,map01130,map01230	Beta_elim_lyase,Pcc1	OTHER
333374	By MS/MS	By MS/MS	By MS/MS	By MS/MS	By matching	By MS/MS	By MS/MS	By MS/MS	By MS/MS	By MS/MS	By MS/MS	By MS/MS	51794000	59796000	67191000	58100000	17409000	39000000	99051000	66331000	91391000	64833000	98430000	66256000	33731000	33310000	47267000	48375000	0	0	48755000	41828000	51086000	40380000	45573000	38922000	5217.XP_007001934.1	2.62e-172	513	COG0598@1|root,2QVFZ@2759|Eukaryota,38FZN@33154|Opisthokonta,3NZZQ@4751|Fungi,3UZ0W@5204|Basidiomycota,3VETF@5234|Tremellales	4751|Fungi	P	CorA-like Mg2+ transporter protein	NA	NA	NA	NA	CorA	OTHER
333384	By MS/MS	By MS/MS	By MS/MS	By MS/MS	NA	By MS/MS	By matching	NA	By matching	By MS/MS	By matching	By matching	84379000	87843000	98798000	59995000	0	7283900	6556300	0	60963000	95639000	65307000	72708000	0	0	0	0	0	0	0	0	0	0	0	0	82508.K1WI38	1.59e-159	459	COG1228@1|root,2QRDE@2759|Eukaryota,38P80@33154|Opisthokonta,3NXY9@4751|Fungi,3UZDP@5204|Basidiomycota,3VGR3@5234|Tremellales	4751|Fungi	G	Amidohydrolase family	NA	NA	NA	NA	Amidohydro_1	OTHER
333429	By MS/MS	By MS/MS	By MS/MS	By MS/MS	By MS/MS	By MS/MS	By MS/MS	By MS/MS	By MS/MS	By MS/MS	By MS/MS	By MS/MS	7689700000	7417800000	7873700000	8111600000	30056000000	25877000000	29430000000	29505000000	7778300000	8401100000	8979000000	7379500000	1215000000	1236800000	1209700000	1328500000	3233800000	3569000000	3023200000	3113000000	1111400000	1035000000	1032400000	1046000000	552467.XP_003192809.1	0	880	COG0469@1|root,KOG2323@2759|Eukaryota,38BPM@33154|Opisthokonta,3NUBE@4751|Fungi,3UZ5S@5204|Basidiomycota,3VE7Q@5234|Tremellales	4751|Fungi	G	Pyruvate kinase, barrel domain	PYK1	GO:0003674,GO:0003824,GO:0004743,GO:0005575,GO:0005618,GO:0005622,GO:0005623,GO:0005737,GO:0005739,GO:0005829,GO:0005886,GO:0005975,GO:0005996,GO:0006006,GO:0006007,GO:0006082,GO:0006090,GO:0006091,GO:0006096,GO:0006139,GO:0006163,GO:0006164,GO:0006165,GO:0006725,GO:0006732,GO:0006733,GO:0006734,GO:0006735,GO:0006753,GO:0006754,GO:0006757,GO:0006793,GO:0006796,GO:0006807,GO:0006950,GO:0007154,GO:…	ko:K00873	ko00010,ko00230,ko00620,ko01100,ko01110,ko01120,ko01130,ko01200,ko01230,ko04922,ko04930,ko05165,ko05203,ko05230,map00010,map00230,map00620,map01100,map01110,map01120,map01130,map01200,map01230,map04922,map04930,map05165,map05203,map05230	PK,PK_C	OTHER
333483	By MS/MS	By MS/MS	By MS/MS	By MS/MS	By MS/MS	By MS/MS	By MS/MS	By MS/MS	By MS/MS	By MS/MS	By MS/MS	By MS/MS	1702800000	1428900000	1623100000	1334800000	2308800000	1632000000	2258400000	1985300000	1482300000	1518400000	2170900000	1683300000	330760000	318060000	312120000	305660000	284380000	277140000	298170000	261480000	331050000	310460000	287810000	361630000	5207.AAW46350	9.15e-281	789	COG0006@1|root,KOG2413@2759|Eukaryota,38B6V@33154|Opisthokonta,3NU3T@4751|Fungi,3UZMK@5204|Basidiomycota,3VCYE@5234|Tremellales	4751|Fungi	E	Cytoplasm protein	AMPP	GO:0000122,GO:0005575,GO:0005622,GO:0005623,GO:0005737,GO:0005829,GO:0006355,GO:0006357,GO:0008150,GO:0009889,GO:0009890,GO:0009892,GO:0009987,GO:0010035,GO:0010038,GO:0010039,GO:0010468,GO:0010556,GO:0010558,GO:0010605,GO:0010629,GO:0019219,GO:0019222,GO:0031323,GO:0031324,GO:0031326,GO:0031327,GO:0034395,GO:0034396,GO:0042221,GO:0044424,GO:0044444,GO:0044464,GO:0045892,GO:0045934,GO:0048519,GO:…	ko:K01262	NA	Creatinase_N,Creatinase_N_2,Peptidase_M24,Peptidase_M24_C	OTHER
333593	By matching	By matching	By matching	By matching	By matching	By MS/MS	By matching	By MS/MS	By matching	By matching	By matching	By matching	20544000	32936000	47545000	46545000	50422000	52344000	28753000	63985000	31351000	39097000	48953000	50826000	0	0	0	0	0	0	0	0	0	0	0	0	552467.XP_003191704.1	5.37e-176	507	KOG0581@1|root,KOG0581@2759|Eukaryota,3ANWI@33154|Opisthokonta,3NUU7@4751|Fungi,3UYYU@5204|Basidiomycota,3VECN@5234|Tremellales	4751|Fungi	T	Kinase-like	wis1	GO:0000165,GO:0000166,GO:0000169,GO:0000187,GO:0001932,GO:0001934,GO:0003674,GO:0003824,GO:0004672,GO:0004674,GO:0004708,GO:0004712,GO:0005078,GO:0005198,GO:0005488,GO:0005515,GO:0005524,GO:0005575,GO:0005622,GO:0005623,GO:0005634,GO:0005737,GO:0005933,GO:0005934,GO:0005935,GO:0006464,GO:0006468,GO:0006793,GO:0006796,GO:0006807,GO:0006950,GO:0006970,GO:0006972,GO:0006979,GO:0006996,GO:0007010,GO:…	ko:K11227	ko04011,ko04139,map04011,map04139	Pkinase	OTHER
333615	By MS/MS	By MS/MS	By MS/MS	By MS/MS	By MS/MS	By MS/MS	By MS/MS	By MS/MS	By MS/MS	By MS/MS	By MS/MS	By MS/MS	13403000000	12596000000	15452000000	16275000000	5597900000	5207100000	5491200000	6573000000	13189000000	13813000000	15960000000	14618000000	4611600000	4398000000	4553500000	5579200000	1469300000	1775000000	1488300000	1816000000	3871700000	3886600000	3792200000	4388600000	82508.K1VS71	2.88e-225	634	COG3844@1|root,KOG3846@2759|Eukaryota,38BHE@33154|Opisthokonta,3NUB7@4751|Fungi,3UZBB@5204|Basidiomycota,3VEGW@5234|Tremellales	4751|Fungi	E	Catalyzes the cleavage of L-kynurenine (L-Kyn) and L-3- hydroxykynurenine (L-3OHKyn) into anthranilic acid (AA) and 3- hydroxyanthranilic acid (3-OHAA), respectively	BNA5	GO:0003674,GO:0003824,GO:0005575,GO:0005622,GO:0005623,GO:0005634,GO:0005737,GO:0006082,GO:0006139,GO:0006520,GO:0006568,GO:0006569,GO:0006576,GO:0006586,GO:0006725,GO:0006732,GO:0006733,GO:0006753,GO:0006766,GO:0006767,GO:0006793,GO:0006796,GO:0006807,GO:0008150,GO:0008152,GO:0009056,GO:0009058,GO:0009063,GO:0009072,GO:0009074,GO:0009108,GO:0009117,GO:0009165,GO:0009308,GO:0009310,GO:0009435,GO:…	ko:K01556	ko00380,ko01100,map00380,map01100	Aminotran_5	OTHER
333701	By MS/MS	By matching	By matching	By matching	By MS/MS	By MS/MS	By MS/MS	By MS/MS	By MS/MS	By MS/MS	By MS/MS	By MS/MS	133910000	124890000	261280000	150840000	676130000	570910000	623340000	523200000	131000000	133850000	225420000	223430000	0	0	162170000	143800000	384800000	0	400760000	304960000	122370000	120660000	130140000	164630000	5217.XP_007004303.1	2.17e-41	147	KOG3223@1|root,KOG3223@2759|Eukaryota,38EMG@33154|Opisthokonta,3P2NW@4751|Fungi,3V0RK@5204|Basidiomycota,3VF29@5234|Tremellales	4751|Fungi	S	Coiled-coil domain-containing protein 124	NA	GO:0003674,GO:0003712,GO:0003713,GO:0005575,GO:0005622,GO:0005623,GO:0005634,GO:0005737,GO:0006139,GO:0006351,GO:0006366,GO:0006725,GO:0006807,GO:0006950,GO:0006979,GO:0008150,GO:0008152,GO:0009058,GO:0009059,GO:0009889,GO:0009891,GO:0009893,GO:0009987,GO:0010467,GO:0010556,GO:0010557,GO:0010604,GO:0016070,GO:0018130,GO:0019219,GO:0019222,GO:0019438,GO:0031323,GO:0031325,GO:0031326,GO:0031328,GO:…	ko:K02357	NA	Ccdc124	OTHER
333795	By MS/MS	By MS/MS	By MS/MS	By MS/MS	By MS/MS	By MS/MS	By MS/MS	By MS/MS	By MS/MS	By MS/MS	By MS/MS	By MS/MS	468490000	178230000	241170000	180490000	657700000	464930000	602290000	539980000	148670000	275700000	199010000	189910000	134190000	105990000	108740000	98238000	120100000	156250000	125480000	145410000	85439000	104580000	106040000	97767000	552467.XP_003191452.1	2.07e-167	491	COG0631@1|root,KOG0700@2759|Eukaryota,38DH4@33154|Opisthokonta,3NXCM@4751|Fungi,3UZN3@5204|Basidiomycota,3VGDM@5234|Tremellales	4751|Fungi	T	Protein phosphatase 2C	NA	NA	ko:K01102	NA	PP2C	OTHER
333932	By MS/MS	By MS/MS	By MS/MS	By MS/MS	By MS/MS	By MS/MS	By MS/MS	By MS/MS	By MS/MS	By MS/MS	By MS/MS	By MS/MS	30699000	65084000	63038000	85173000	152540000	64217000	152670000	196160000	40515000	78859000	98590000	71254000	0	29451000	0	35897000	40700000	18009000	54776000	31579000	26175000	48526000	30710000	38597000	82508.K1VXK7	0	1886	COG1643@1|root,KOG0922@2759|Eukaryota,38C5G@33154|Opisthokonta,3NVRX@4751|Fungi,3V00F@5204|Basidiomycota,3VDPM@5234|Tremellales	4751|Fungi	A	Helicase associated domain (HA2) Add an annotation	PRP22	GO:0000350,GO:0000375,GO:0000377,GO:0000390,GO:0000393,GO:0000398,GO:0003674,GO:0003676,GO:0003723,GO:0003724,GO:0003824,GO:0004004,GO:0004386,GO:0005488,GO:0005575,GO:0005622,GO:0005623,GO:0005634,GO:0005681,GO:0005684,GO:0005737,GO:0006139,GO:0006396,GO:0006397,GO:0006725,GO:0006807,GO:0008026,GO:0008150,GO:0008152,GO:0008186,GO:0008380,GO:0009987,GO:0010467,GO:0016043,GO:0016070,GO:0016071,GO:…	ko:K12818	ko03040,map03040	AAA_22,DEAD,HA2,Helicase_C,OB_NTP_bind,S1	OTHER
333943	By MS/MS	By MS/MS	By MS/MS	By MS/MS	By matching	By MS/MS	By MS/MS	By matching	By matching	By MS/MS	By MS/MS	By matching	163630000	146740000	48943000	215560000	158830000	118380000	169370000	172810000	60272000	102450000	111060000	69299000	77322000	76454000	0	103240000	57585000	69910000	50146000	52653000	63167000	76824000	88500000	64792000	82508.K1VW71	2.33e-60	188	KOG3426@1|root,KOG3426@2759|Eukaryota,3A1I4@33154|Opisthokonta,3P2TN@4751|Fungi,3V1N7@5204|Basidiomycota,3VFKC@5234|Tremellales	4751|Fungi	C	Belongs to the complex I LYR family	NdufA6	GO:0005575,GO:0005622,GO:0005623,GO:0005737,GO:0005739,GO:0005740,GO:0005743,GO:0016020,GO:0019866,GO:0031090,GO:0031966,GO:0031967,GO:0031975,GO:0043226,GO:0043227,GO:0043229,GO:0043231,GO:0044422,GO:0044424,GO:0044429,GO:0044444,GO:0044446,GO:0044464	ko:K03950	ko00190,ko01100,ko04714,ko04723,ko04932,ko05010,ko05012,ko05016,map00190,map01100,map04714,map04723,map04932,map05010,map05012,map05016	Complex1_LYR,Complex1_LYR_2	OTHER
334060	By MS/MS	By MS/MS	By MS/MS	By MS/MS	By MS/MS	By MS/MS	By MS/MS	By MS/MS	By MS/MS	By MS/MS	By MS/MS	By MS/MS	1618200000	1900900000	2352600000	2227000000	1872100000	1321700000	1670600000	2355800000	2043500000	2835700000	1956400000	1879700000	436420000	477440000	479190000	531050000	359820000	324140000	351960000	343760000	467370000	471450000	444040000	450700000	82508.K1W330	9.33e-173	504	COG5190@1|root,KOG2832@2759|Eukaryota,38DKE@33154|Opisthokonta,3NW4Q@4751|Fungi,3UZ09@5204|Basidiomycota,3VCWD@5234|Tremellales	4751|Fungi	U	catalytic domain of ctd-like phosphatases	TIM50	GO:0003674,GO:0003824,GO:0004721,GO:0005048,GO:0005488,GO:0005575,GO:0005622,GO:0005623,GO:0005737,GO:0005739,GO:0005740,GO:0005743,GO:0005744,GO:0005886,GO:0006464,GO:0006470,GO:0006605,GO:0006626,GO:0006793,GO:0006796,GO:0006807,GO:0006810,GO:0006839,GO:0006886,GO:0006996,GO:0007005,GO:0007006,GO:0008104,GO:0008150,GO:0008152,GO:0009987,GO:0015031,GO:0015833,GO:0016020,GO:0016021,GO:0016043,GO:…	ko:K17496	NA	NIF	OTHER
334099	By MS/MS	By MS/MS	By MS/MS	By MS/MS	By MS/MS	By MS/MS	By MS/MS	By MS/MS	By MS/MS	By MS/MS	By MS/MS	By MS/MS	629430000	971330000	1104500000	867260000	2426200000	2191900000	2174900000	2415400000	1143600000	1195700000	1188500000	1572600000	494320000	496190000	481350000	501790000	678380000	820450000	627690000	588650000	574010000	551900000	470560000	542160000	5207.AAW46122	3.07e-85	271	28MZB@1|root,2QUI6@2759|Eukaryota,38HPW@33154|Opisthokonta,3NZ44@4751|Fungi,3V0FB@5204|Basidiomycota,3VDPE@5234|Tremellales	4751|Fungi	S	von Willebrand factor (vWF) type A domain	NA	NA	NA	NA	vWA-TerF-like	OTHER
334106	By matching	By MS/MS	By matching	By MS/MS	By MS/MS	By matching	By MS/MS	By matching	By matching	By MS/MS	By MS/MS	By MS/MS	16717000	68772000	27260000	60721000	141790000	12405000	135020000	56157000	21176000	22793000	29867000	41015000	0	0	0	0	0	0	0	0	0	0	0	0	5207.AAW40701	9.08e-197	557	COG1537@1|root,KOG2869@2759|Eukaryota,38FIS@33154|Opisthokonta,3NUSJ@4751|Fungi,3UYAG@5204|Basidiomycota,3VGTF@5234|Tremellales	4751|Fungi	J	May function in recognizing stalled ribosomes and triggering endonucleolytic cleavage of the mRNA, a mechanism to release non-functional ribosomes and degrade damaged mRNAs	DOM34	GO:0000956,GO:0002181,GO:0002184,GO:0003674,GO:0003676,GO:0003723,GO:0003747,GO:0003824,GO:0004518,GO:0004519,GO:0004521,GO:0004540,GO:0005488,GO:0005575,GO:0005622,GO:0005623,GO:0005737,GO:0006139,GO:0006401,GO:0006402,GO:0006412,GO:0006415,GO:0006417,GO:0006518,GO:0006725,GO:0006807,GO:0006950,GO:0006986,GO:0006996,GO:0007154,GO:0007165,GO:0008079,GO:0008135,GO:0008150,GO:0008152,GO:0009056,GO:…	ko:K06965	ko03015,map03015	eRF1_1,eRF1_2,eRF1_3	OTHER
334110	By MS/MS	By MS/MS	By MS/MS	By MS/MS	By MS/MS	By MS/MS	By MS/MS	By MS/MS	By MS/MS	By MS/MS	By MS/MS	By matching	244070000	243220000	306270000	199690000	300920000	290400000	383640000	360810000	185420000	284610000	308800000	282260000	105170000	96531000	105580000	117670000	57555000	88929000	85545000	68234000	70353000	85779000	90078000	87018000	82508.K1VKU9	0	950	2CNFS@1|root,2QVZ9@2759|Eukaryota,39SAK@33154|Opisthokonta,3NWJ8@4751|Fungi,3V44V@5204|Basidiomycota,3VDQ5@5234|Tremellales	4751|Fungi	K	Fungal specific transcription factor domain	NA	NA	NA	NA	Fungal_trans,Zn_clus	OTHER
334113	NA	NA	NA	NA	By MS/MS	NA	NA	NA	NA	NA	NA	NA	0	0	0	0	0	0	0	0	0	0	0	0	0	0	0	0	0	0	0	0	0	0	0	0	82508.K1VGC1	4.01e-162	461	COG1946@1|root,KOG3016@2759|Eukaryota,38GG7@33154|Opisthokonta,3NXST@4751|Fungi,3V0C6@5204|Basidiomycota,3VF2E@5234|Tremellales	4751|Fungi	I	Acyl-CoA thioesterase	TES1	GO:0003674,GO:0003824,GO:0005575,GO:0005622,GO:0005623,GO:0005737,GO:0005739,GO:0005777,GO:0005782,GO:0006082,GO:0006139,GO:0006163,GO:0006629,GO:0006631,GO:0006635,GO:0006637,GO:0006725,GO:0006732,GO:0006753,GO:0006790,GO:0006793,GO:0006796,GO:0006807,GO:0008150,GO:0008152,GO:0009056,GO:0009062,GO:0009117,GO:0009150,GO:0009259,GO:0009987,GO:0016042,GO:0016054,GO:0016289,GO:0016787,GO:0016788,GO:…	ko:K01068,ko:K11992	ko00062,ko00120,ko01040,ko01100,ko01110,ko04146,map00062,map00120,map01040,map01100,map01110,map04146	4HBT_3	OTHER
334152	By MS/MS	By MS/MS	By MS/MS	By matching	By MS/MS	By MS/MS	By MS/MS	By MS/MS	By MS/MS	By MS/MS	By MS/MS	By matching	226330000	189530000	107380000	175410000	439910000	963380000	864240000	961670000	273520000	265650000	288610000	228270000	89685000	89750000	74281000	92337000	107540000	430220000	299710000	360410000	126020000	85204000	80103000	58430000	5207.AAW43465	1.23e-77	236	COG0386@1|root,KOG1651@2759|Eukaryota,3A1XE@33154|Opisthokonta,3P24F@4751|Fungi,3V104@5204|Basidiomycota,3VFJX@5234|Tremellales	4751|Fungi	O	Glutathione peroxidase	GPX2	GO:0000302,GO:0003674,GO:0003824,GO:0004601,GO:0005575,GO:0005622,GO:0005623,GO:0005737,GO:0005739,GO:0005829,GO:0006950,GO:0006979,GO:0008150,GO:0008152,GO:0008379,GO:0009056,GO:0009636,GO:0009987,GO:0010035,GO:0016209,GO:0016491,GO:0016684,GO:0016999,GO:0017001,GO:0017144,GO:0019725,GO:0033554,GO:0034599,GO:0034614,GO:0035690,GO:0042221,GO:0042493,GO:0042542,GO:0042592,GO:0042737,GO:0042743,GO:…	ko:K00432	ko00480,ko00590,ko04918,map00480,map00590,map04918	GSHPx	OTHER
334183	By MS/MS	By MS/MS	By MS/MS	By MS/MS	By MS/MS	By MS/MS	By MS/MS	By MS/MS	By MS/MS	By MS/MS	By MS/MS	By MS/MS	44741000000	45975000000	48794000000	39818000000	78056000000	70426000000	72033000000	87108000000	46815000000	50846000000	53898000000	49361000000	8239000000	8226100000	7596000000	6668500000	9201900000	10793000000	8549800000	9552600000	7910000000	7577800000	7400200000	6909300000	82508.K1W4Z9	0	1094	COG0443@1|root,KOG0101@2759|Eukaryota,38BSZ@33154|Opisthokonta,3NVJE@4751|Fungi,3UXZ2@5204|Basidiomycota,3VD8R@5234|Tremellales	4751|Fungi	O	Belongs to the heat shock protein 70 family	SSA2	GO:0000049,GO:0000060,GO:0000166,GO:0000209,GO:0000322,GO:0000323,GO:0000324,GO:0000329,GO:0002181,GO:0002376,GO:0003674,GO:0003676,GO:0003723,GO:0003824,GO:0005488,GO:0005515,GO:0005524,GO:0005575,GO:0005576,GO:0005618,GO:0005622,GO:0005623,GO:0005634,GO:0005681,GO:0005737,GO:0005739,GO:0005773,GO:0005774,GO:0005829,GO:0005844,GO:0005886,GO:0006403,GO:0006404,GO:0006412,GO:0006457,GO:0006464,GO:…	ko:K03283	ko03040,ko04010,ko04141,ko04144,ko04213,ko04612,ko04915,ko05134,ko05145,ko05162,ko05164,ko05169,map03040,map04010,map04141,map04144,map04213,map04612,map04915,map05134,map05145,map05162,map05164,map05169	HSP70	OTHER
334211	NA	NA	NA	NA	NA	By MS/MS	NA	NA	NA	NA	NA	NA	0	0	0	0	0	9955400	0	0	0	0	0	0	0	0	0	0	0	0	0	0	0	0	0	0	5346.XP_001832648.1	1.61e-52	178	2EKAE@1|root,2SQ8M@2759|Eukaryota,3AM0D@33154|Opisthokonta,3PE71@4751|Fungi,3V5DU@5204|Basidiomycota,22D48@155619|Agaricomycetes,3W951@5338|Agaricales	4751|Fungi	O	G-X-X-X-Q-X-W domain-containing protein	NA	NA	NA	NA	Ricin_B_lectin	SP
334217	NA	NA	By matching	By MS/MS	By matching	By MS/MS	NA	By MS/MS	By matching	By matching	By MS/MS	By matching	0	0	69671000	75327000	73843000	0	0	88470000	40735000	27051000	47874000	18561000	0	0	0	0	0	0	0	0	0	0	0	0	82508.K1VSD0	3.09e-77	237	COG5538@1|root,KOG4699@2759|Eukaryota,39V13@33154|Opisthokonta,3NXUE@4751|Fungi,3V18H@5204|Basidiomycota,3VFAR@5234|Tremellales	4751|Fungi	U	Preprotein translocase subunit Sec66	sec66	GO:0005575,GO:0005622,GO:0005623,GO:0005737,GO:0005783,GO:0005789,GO:0005791,GO:0006605,GO:0006612,GO:0006620,GO:0006810,GO:0006886,GO:0008104,GO:0008150,GO:0012505,GO:0015031,GO:0015833,GO:0016020,GO:0016021,GO:0030447,GO:0030867,GO:0031090,GO:0031204,GO:0031205,GO:0031207,GO:0031224,GO:0031984,GO:0032991,GO:0033036,GO:0033365,GO:0034613,GO:0040007,GO:0042175,GO:0042886,GO:0043226,GO:0043227,GO:…	ko:K12273	NA	Sec66	OTHER
334244	By MS/MS	By MS/MS	By MS/MS	By MS/MS	By MS/MS	By MS/MS	By MS/MS	By MS/MS	By MS/MS	By MS/MS	By MS/MS	By MS/MS	7167900000	6762700000	8602600000	8066300000	10366000000	9401400000	10439000000	10782000000	7489400000	7980400000	8751300000	8358600000	1380300000	1387500000	1478300000	1844900000	1101700000	1308900000	1212700000	1138800000	1328400000	1313300000	1305300000	1343600000	82508.K1VQN2	0	994	KOG0123@1|root,KOG0123@2759|Eukaryota,38F9F@33154|Opisthokonta,3NXFC@4751|Fungi,3UYGI@5204|Basidiomycota,3VDXF@5234|Tremellales	4751|Fungi	A	Binds the poly(A) tail of mRNA	PAB1	GO:0003674,GO:0003676,GO:0003682,GO:0003723,GO:0003727,GO:0003729,GO:0004857,GO:0005488,GO:0005575,GO:0005622,GO:0005623,GO:0005634,GO:0005681,GO:0005737,GO:0005840,GO:0006403,GO:0006405,GO:0006406,GO:0006417,GO:0006446,GO:0006611,GO:0006810,GO:0006886,GO:0006913,GO:0008104,GO:0008143,GO:0008150,GO:0008152,GO:0008428,GO:0009889,GO:0009894,GO:0010467,GO:0010468,GO:0010494,GO:0010556,GO:0010608,GO:…	ko:K13126	ko03013,ko03015,ko03018,map03013,map03015,map03018	PABP,RRM_1	OTHER
334261	By matching	By matching	By MS/MS	By matching	By MS/MS	By MS/MS	By MS/MS	By MS/MS	By matching	By MS/MS	By matching	By matching	58764000	79793000	68630000	28096000	549010000	604050000	631430000	802460000	111000000	115030000	115680000	159550000	53948000	50081000	37579000	0	193830000	197460000	204670000	251400000	68501000	43459000	58330000	79729000	82508.K1WFF4	1.08e-193	545	COG1063@1|root,KOG0024@2759|Eukaryota,38BYX@33154|Opisthokonta,3NU8H@4751|Fungi,3UZU4@5204|Basidiomycota,3VCR7@5234|Tremellales	4751|Fungi	Q	Alcohol dehydrogenase GroES-like domain	NA	NA	ko:K00008,ko:K05351	ko00040,ko00051,ko01100,map00040,map00051,map01100	ADH_N,ADH_zinc_N	OTHER
334354	By MS/MS	By MS/MS	By MS/MS	By MS/MS	By MS/MS	By MS/MS	By MS/MS	By MS/MS	By MS/MS	By MS/MS	By MS/MS	By MS/MS	1691700000	1570200000	2032100000	1768700000	3050700000	3234200000	2905300000	3824500000	1858300000	2144900000	2599800000	1675800000	697640000	628210000	667200000	568900000	724410000	986500000	741190000	775660000	681230000	648670000	668250000	517050000	552467.XP_003197005.1	4.26e-111	330	COG0543@1|root,KOG0534@2759|Eukaryota,38C8B@33154|Opisthokonta,3NVGH@4751|Fungi,3UZTJ@5204|Basidiomycota,3VGRB@5234|Tremellales	4751|Fungi	CH	Oxidoreductase FAD-binding domain	NA	NA	ko:K00326	ko00520,map00520	FAD_binding_6,NAD_binding_1	OTHER
334468	By MS/MS	By MS/MS	By MS/MS	By MS/MS	By MS/MS	By MS/MS	By MS/MS	By MS/MS	By MS/MS	By MS/MS	By MS/MS	By MS/MS	177230000	249050000	266400000	357430000	479160000	325370000	503520000	526740000	195420000	292060000	277920000	170860000	81252000	85615000	73389000	89830000	75318000	85373000	81008000	101320000	63502000	67704000	75747000	71067000	82508.K1V6V8	0	3084	KOG0916@1|root,KOG0916@2759|Eukaryota,39S3J@33154|Opisthokonta,3NUI9@4751|Fungi,3UYI9@5204|Basidiomycota,3VDHE@5234|Tremellales	4751|Fungi	M	1,3-beta-glucan synthase subunit FKS1	FKS1	GO:0000003,GO:0000148,GO:0000271,GO:0000278,GO:0000281,GO:0000746,GO:0000747,GO:0000910,GO:0000917,GO:0000935,GO:0000936,GO:0003006,GO:0003674,GO:0003824,GO:0003843,GO:0005575,GO:0005618,GO:0005622,GO:0005623,GO:0005628,GO:0005737,GO:0005739,GO:0005794,GO:0005826,GO:0005856,GO:0005886,GO:0005933,GO:0005934,GO:0005935,GO:0005937,GO:0005938,GO:0005975,GO:0005976,GO:0006073,GO:0006074,GO:0006075,GO:…	ko:K00706	ko00500,ko04011,map00500,map04011	FKS1_dom1,Glucan_synthase	OTHER
334482	NA	NA	NA	NA	By matching	By MS/MS	By matching	By MS/MS	NA	NA	NA	NA	0	0	0	0	91421000	79247000	107780000	82302000	0	0	0	0	0	0	0	0	0	0	0	0	0	0	0	0	82508.K1VPV1	4.27e-235	680	KOG0667@1|root,KOG0671@2759|Eukaryota,38EZY@33154|Opisthokonta,3NUFQ@4751|Fungi,3UYU0@5204|Basidiomycota,3VEFV@5234|Tremellales	4751|Fungi	T	Serine/Threonine protein kinases, catalytic domain	LKH1	GO:0000079,GO:0000429,GO:0000430,GO:0000433,GO:0000920,GO:0001932,GO:0001933,GO:0003674,GO:0003824,GO:0004672,GO:0004674,GO:0004713,GO:0005575,GO:0005622,GO:0005623,GO:0005634,GO:0005737,GO:0006355,GO:0006357,GO:0006359,GO:0006464,GO:0006468,GO:0006469,GO:0006793,GO:0006796,GO:0006807,GO:0006950,GO:0006979,GO:0007154,GO:0007346,GO:0007584,GO:0008150,GO:0008152,GO:0009605,GO:0009889,GO:0009890,GO:…	ko:K08287	NA	Pkinase	OTHER
334529	By matching	By matching	By MS/MS	By MS/MS	By matching	By matching	By matching	By MS/MS	By MS/MS	By MS/MS	By MS/MS	By matching	14719000	21785000	79351000	26735000	45074000	32511000	70259000	51953000	49401000	59386000	64618000	55260000	0	0	45419000	0	0	0	25786000	0	26152000	27382000	26725000	25309000	82508.K1VTH2	2.6e-292	823	COG0790@1|root,KOG1550@2759|Eukaryota,38DRF@33154|Opisthokonta,3NWWI@4751|Fungi,3UZGP@5204|Basidiomycota,3VEG7@5234|Tremellales	4751|Fungi	MOT	Sel1-like repeats.	NA	NA	NA	NA	Sel1	OTHER
334536	By MS/MS	By MS/MS	By MS/MS	By MS/MS	By MS/MS	By MS/MS	By MS/MS	By MS/MS	By MS/MS	By MS/MS	By MS/MS	By MS/MS	693230000	793170000	671980000	778460000	1554400000	1160600000	1458700000	1418400000	688070000	1112000000	1184200000	901410000	176600000	166210000	149920000	193920000	204420000	189670000	201310000	176950000	151550000	197080000	192900000	174990000	5217.XP_007006747.1	2.61e-186	542	KOG0266@1|root,KOG0266@2759|Eukaryota,38E6T@33154|Opisthokonta,3NUUI@4751|Fungi,3UYSJ@5204|Basidiomycota,3VDMM@5234|Tremellales	4751|Fungi	S	Tup N-terminal	TUP1	GO:0000003,GO:0000122,GO:0000228,GO:0000429,GO:0000430,GO:0000433,GO:0000785,GO:0000790,GO:0000988,GO:0000989,GO:0001076,GO:0001191,GO:0001196,GO:0001198,GO:0003006,GO:0003674,GO:0005488,GO:0005515,GO:0005543,GO:0005575,GO:0005622,GO:0005623,GO:0005634,GO:0005654,GO:0005694,GO:0006323,GO:0006325,GO:0006333,GO:0006338,GO:0006342,GO:0006355,GO:0006357,GO:0006950,GO:0006970,GO:0006996,GO:0007154,GO:…	ko:K06666	ko04011,ko04111,map04011,map04111	Tup_N,WD40	OTHER
334538	By MS/MS	By MS/MS	By MS/MS	By MS/MS	By MS/MS	By MS/MS	By MS/MS	By MS/MS	By MS/MS	By MS/MS	By MS/MS	By MS/MS	1830400000	1648800000	2218900000	1967300000	858890000	973190000	1196800000	1397400000	2424700000	2981800000	2953200000	2663300000	610690000	516160000	619940000	615610000	285000000	228650000	276390000	275740000	693900000	782530000	708680000	757070000	552467.XP_003192152.1	3.65e-223	637	COG0624@1|root,KOG2275@2759|Eukaryota,39RWD@33154|Opisthokonta,3NU4A@4751|Fungi,3UZMD@5204|Basidiomycota,3VDF2@5234|Tremellales	4751|Fungi	E	Peptidase family M20/M25/M40	NA	GO:0000322,GO:0000323,GO:0000324,GO:0000328,GO:0003674,GO:0003824,GO:0004180,GO:0005575,GO:0005622,GO:0005623,GO:0005737,GO:0005773,GO:0005775,GO:0006508,GO:0006807,GO:0008150,GO:0008152,GO:0008233,GO:0008238,GO:0009056,GO:0009057,GO:0009987,GO:0016787,GO:0019538,GO:0030163,GO:0031974,GO:0043170,GO:0043226,GO:0043227,GO:0043229,GO:0043231,GO:0043233,GO:0044237,GO:0044238,GO:0044248,GO:0044257,GO:…	ko:K01293	NA	M20_dimer,Peptidase_M20	OTHER
334650	By matching	By matching	By matching	By MS/MS	By MS/MS	By MS/MS	By MS/MS	By MS/MS	By matching	By matching	By MS/MS	By MS/MS	30706000	38135000	31488000	12546000	98569000	60901000	52131000	62905000	11889000	66707000	43727000	87391000	23645000	0	23246000	0	24690000	20000000	22247000	23633000	0	27766000	31862000	34059000	82508.K1VF65	2.29e-59	196	2CYWF@1|root,2S6W0@2759|Eukaryota,3A9HP@33154|Opisthokonta,3P7DW@4751|Fungi,3V26E@5204|Basidiomycota,3VFTJ@5234|Tremellales	4751|Fungi	S	Rrp15p	NA	NA	NA	NA	Rrp15p	OTHER
334651	By MS/MS	By MS/MS	By MS/MS	By matching	By MS/MS	By MS/MS	By MS/MS	By MS/MS	By MS/MS	By MS/MS	By MS/MS	By MS/MS	45649000	66391000	60022000	57535000	111420000	90231000	89614000	140380000	43304000	61762000	51425000	52645000	0	35595000	32792000	33611000	45259000	61034000	48207000	74168000	25010000	0	26626000	29812000	552467.XP_003192699.1	1.74e-149	442	COG5044@1|root,KOG1439@2759|Eukaryota,39K8Z@33154|Opisthokonta,3Q4MR@4751|Fungi,3V0AQ@5204|Basidiomycota,3VD9G@5234|Tremellales	4751|Fungi	O	GDP dissociation inhibitor	NA	NA	ko:K17255	NA	GDI	OTHER
334695	By matching	By MS/MS	By matching	By MS/MS	By MS/MS	By MS/MS	By MS/MS	By MS/MS	By MS/MS	By MS/MS	By MS/MS	By MS/MS	29969000	89213000	71260000	70547000	172700000	118810000	129650000	178010000	97158000	66317000	142510000	92750000	0	52417000	49158000	55848000	54367000	48048000	43371000	45380000	49968000	41960000	56022000	53106000	5207.AAW42359	4.97e-302	859	28N82@1|root,2QUTC@2759|Eukaryota,38HRW@33154|Opisthokonta,3NZMU@4751|Fungi,3V025@5204|Basidiomycota,3VEEU@5234|Tremellales	4751|Fungi	S	heparinase ii iii family protein	NA	NA	NA	NA	Hepar_II_III	OTHER
334749	By MS/MS	By MS/MS	By MS/MS	By MS/MS	By MS/MS	By MS/MS	By MS/MS	By MS/MS	By MS/MS	By MS/MS	By MS/MS	By MS/MS	1091500000	1090600000	1006900000	2016500000	725610000	551960000	735030000	739110000	1873800000	1501100000	1533200000	1148700000	310170000	317280000	296560000	347430000	143110000	154400000	125140000	139350000	375360000	366570000	371780000	398880000	552467.XP_003196719.1	7.16999999993371e-314	866	COG1499@1|root,KOG2613@2759|Eukaryota,38ESW@33154|Opisthokonta,3NTWS@4751|Fungi,3UY4U@5204|Basidiomycota,3VEPM@5234|Tremellales	4751|Fungi	J	Acts as an adapter for the XPO1 CRM1-mediated export of the 60S ribosomal subunit	NMD3	GO:0000054,GO:0000055,GO:0003674,GO:0005488,GO:0005575,GO:0005622,GO:0005623,GO:0005634,GO:0005737,GO:0005829,GO:0006403,GO:0006405,GO:0006611,GO:0006810,GO:0006886,GO:0006913,GO:0008104,GO:0008150,GO:0015031,GO:0015833,GO:0015931,GO:0022613,GO:0030684,GO:0030687,GO:0031503,GO:0032991,GO:0033036,GO:0033750,GO:0034613,GO:0042254,GO:0042886,GO:0043021,GO:0043023,GO:0043226,GO:0043227,GO:0043229,GO:…	ko:K07562	ko03008,ko03013,map03008,map03013	NMD3	OTHER
334799	By matching	By matching	By MS/MS	By matching	By matching	By matching	By matching	By matching	By matching	By matching	By matching	By matching	16701000	22412000	71729000	41729000	26509000	23847000	18767000	34295000	37757000	25545000	48644000	45844000	0	0	0	0	0	0	0	0	0	0	0	0	82508.K1VK51	2.93e-176	511	COG0162@1|root,KOG2623@2759|Eukaryota,38DXN@33154|Opisthokonta,3NTZP@4751|Fungi,3UZUV@5204|Basidiomycota,3VE34@5234|Tremellales	4751|Fungi	J	tRNA synthetases class I (W and Y)	MSY1	GO:0000166,GO:0000372,GO:0000375,GO:0000376,GO:0000959,GO:0003674,GO:0003676,GO:0003723,GO:0003824,GO:0004812,GO:0004831,GO:0005488,GO:0005515,GO:0005524,GO:0005575,GO:0005622,GO:0005623,GO:0005737,GO:0005739,GO:0005759,GO:0005829,GO:0006082,GO:0006139,GO:0006396,GO:0006399,GO:0006412,GO:0006418,GO:0006437,GO:0006518,GO:0006520,GO:0006725,GO:0006807,GO:0008144,GO:0008150,GO:0008152,GO:0008380,GO:…	ko:K01866	ko00970,map00970	TyrRSs_C,tRNA-synt_1b	OTHER
334849	By matching	By matching	By MS/MS	By MS/MS	By MS/MS	By MS/MS	By MS/MS	By MS/MS	By MS/MS	By matching	By MS/MS	By MS/MS	48932000	53444000	69260000	55157000	130580000	158600000	133860000	50889000	42623000	52746000	58953000	51862000	0	0	0	0	56293000	79952000	58898000	0	0	0	0	0	5207.AAW46294	0	976	COG5275@1|root,KOG1968@2759|Eukaryota,38C6S@33154|Opisthokonta,3NWJJ@4751|Fungi,3UZIK@5204|Basidiomycota,3VCUM@5234|Tremellales	4751|Fungi	L	Replication factor RFC1 C terminal domain	rfc1	GO:0000228,GO:0000278,GO:0000785,GO:0000790,GO:0003674,GO:0003676,GO:0003677,GO:0003682,GO:0005488,GO:0005575,GO:0005622,GO:0005623,GO:0005634,GO:0005657,GO:0005663,GO:0005694,GO:0006139,GO:0006259,GO:0006260,GO:0006261,GO:0006271,GO:0006272,GO:0006281,GO:0006298,GO:0006725,GO:0006807,GO:0006950,GO:0006974,GO:0007049,GO:0008150,GO:0008152,GO:0009058,GO:0009059,GO:0009314,GO:0009411,GO:0009416,GO:…	ko:K10754	ko03030,ko03420,ko03430,map03030,map03420,map03430	AAA,BRCT,RFC1	OTHER
334886	NA	NA	By matching	By matching	By MS/MS	By MS/MS	By MS/MS	By MS/MS	By matching	NA	NA	NA	0	0	16412000	12142000	72255000	55063000	110730000	59984000	15713000	0	0	0	0	0	0	0	0	0	0	0	0	0	0	0	82508.K1VHQ4	9.94e-205	575	COG5070@1|root,KOG1444@2759|Eukaryota,38FCE@33154|Opisthokonta,3NWKQ@4751|Fungi,3V07H@5204|Basidiomycota,3VDBT@5234|Tremellales	4751|Fungi	U	Transporter	VRG4	GO:0000139,GO:0000271,GO:0003674,GO:0005215,GO:0005338,GO:0005458,GO:0005575,GO:0005622,GO:0005623,GO:0005737,GO:0005739,GO:0005783,GO:0005794,GO:0005975,GO:0005976,GO:0006464,GO:0006486,GO:0006487,GO:0006807,GO:0006810,GO:0007163,GO:0008150,GO:0008152,GO:0009058,GO:0009059,GO:0009100,GO:0009101,GO:0009272,GO:0009987,GO:0010383,GO:0012505,GO:0015780,GO:0015931,GO:0015932,GO:0016020,GO:0016021,GO:…	ko:K15356	NA	EamA,UAA	OTHER
334902	By MS/MS	By MS/MS	By MS/MS	By MS/MS	By MS/MS	By MS/MS	By MS/MS	By MS/MS	By MS/MS	By MS/MS	By MS/MS	By MS/MS	2897000000	2388400000	4071000000	3606700000	3403300000	3409700000	3344200000	3825700000	3190200000	3545500000	4057700000	3887000000	714920000	744220000	716120000	914330000	576070000	613800000	507950000	504880000	713030000	784700000	779910000	714440000	5217.XP_007002067.1	1.62e-64	200	COG0537@1|root,KOG3275@2759|Eukaryota,3A3J2@33154|Opisthokonta,3P2XN@4751|Fungi,3V1EK@5204|Basidiomycota,3VFHC@5234|Tremellales	4751|Fungi	T	HIT domain	HNT1	GO:0000166,GO:0003674,GO:0003824,GO:0005488,GO:0005575,GO:0005622,GO:0005623,GO:0005634,GO:0005737,GO:0006139,GO:0006725,GO:0006753,GO:0006793,GO:0006796,GO:0006807,GO:0008150,GO:0008152,GO:0009117,GO:0009987,GO:0016787,GO:0016810,GO:0016811,GO:0019637,GO:0034641,GO:0036094,GO:0043226,GO:0043227,GO:0043229,GO:0043231,GO:0043530,GO:0044237,GO:0044238,GO:0044281,GO:0044424,GO:0044464,GO:0046483,GO:…	ko:K01518	ko00230,ko00240,map00230,map00240	HIT	OTHER
334943	NA	NA	NA	NA	By matching	By MS/MS	By matching	By MS/MS	NA	NA	NA	NA	0	0	0	0	58206000	99803000	126550000	141210000	0	0	0	0	0	0	0	0	0	0	0	0	0	0	0	0	5207.AAW42393	9.19e-214	615	KOG0254@1|root,KOG0254@2759|Eukaryota,38CRV@33154|Opisthokonta,3NUD0@4751|Fungi,3UY49@5204|Basidiomycota,3VDD2@5234|Tremellales	4751|Fungi	U	Major Facilitator Superfamily	NA	NA	NA	NA	MFS_1,Sugar_tr	OTHER
335071	By matching	By MS/MS	By MS/MS	By MS/MS	By MS/MS	By MS/MS	By matching	By MS/MS	By matching	By MS/MS	By MS/MS	By MS/MS	30184000	55291000	86326000	65597000	88585000	86047000	70516000	92236000	28337000	61948000	77498000	80583000	0	35579000	41337000	37673000	41486000	38696000	33377000	37779000	0	34262000	37491000	42434000	82508.K1VUI2	1.31e-210	601	KOG1363@1|root,KOG1363@2759|Eukaryota,38P9K@33154|Opisthokonta,3NUGG@4751|Fungi,3V07V@5204|Basidiomycota,3VEEM@5234|Tremellales	4751|Fungi	U	UBX domain	ucp10	GO:0000151,GO:0003674,GO:0005488,GO:0005515,GO:0005575,GO:0005622,GO:0005623,GO:0005737,GO:0005783,GO:0006325,GO:0006355,GO:0006357,GO:0006464,GO:0006508,GO:0006511,GO:0006807,GO:0006810,GO:0006897,GO:0006898,GO:0006950,GO:0006984,GO:0006991,GO:0006996,GO:0007154,GO:0007165,GO:0008150,GO:0008152,GO:0009056,GO:0009057,GO:0009889,GO:0009891,GO:0009893,GO:0009987,GO:0010467,GO:0010468,GO:0010498,GO:…	ko:K18726	NA	UBA_4,UBX	OTHER
335080	By MS/MS	By MS/MS	By MS/MS	By MS/MS	By MS/MS	By MS/MS	By MS/MS	By MS/MS	By MS/MS	By MS/MS	By MS/MS	By MS/MS	1082800000	857940000	968290000	992030000	820790000	765910000	795750000	907500000	761220000	863350000	747480000	751530000	173540000	163700000	194160000	202340000	136540000	140740000	117590000	141550000	157600000	157030000	142790000	170480000	5207.AAW46856	2.89e-275	768	COG0807@1|root,KOG1284@2759|Eukaryota,39JRY@33154|Opisthokonta,3NXYB@4751|Fungi,3V02N@5204|Basidiomycota,3VET8@5234|Tremellales	4751|Fungi	H	GTP cyclohydrolase N terminal	NA	NA	NA	NA	GTP_CH_N,GTP_cyclohydro2	OTHER
335087	By MS/MS	By MS/MS	By MS/MS	By MS/MS	By MS/MS	By matching	By matching	By MS/MS	By matching	By MS/MS	By MS/MS	By MS/MS	110240000	118440000	119510000	119910000	128370000	108490000	155990000	107420000	99553000	157100000	183040000	200830000	0	48519000	0	0	51554000	49546000	56566000	51715000	0	50426000	48592000	57983000	82508.K1VVI9	4.56e-257	726	COG1867@1|root,KOG1253@2759|Eukaryota,38I4E@33154|Opisthokonta,3NUG5@4751|Fungi,3UY21@5204|Basidiomycota,3VD1J@5234|Tremellales	4751|Fungi	J	N2,N2-dimethylguanosine tRNA methyltransferase	TRM1	GO:0001510,GO:0002940,GO:0003674,GO:0003824,GO:0004809,GO:0005575,GO:0005622,GO:0005623,GO:0005634,GO:0005635,GO:0005637,GO:0005737,GO:0005739,GO:0006139,GO:0006396,GO:0006399,GO:0006400,GO:0006725,GO:0006807,GO:0008033,GO:0008150,GO:0008152,GO:0008168,GO:0008170,GO:0008173,GO:0008175,GO:0008757,GO:0009451,GO:0009987,GO:0010467,GO:0012505,GO:0016020,GO:0016070,GO:0016423,GO:0016740,GO:0016741,GO:…	ko:K00555	NA	TRM	OTHER
335092	By MS/MS	By MS/MS	By MS/MS	By MS/MS	By MS/MS	By MS/MS	By MS/MS	By MS/MS	By MS/MS	By MS/MS	By MS/MS	By MS/MS	220690000	105520000	219060000	171290000	104610000	97444000	58022000	140110000	242680000	211840000	247900000	306310000	89265000	63159000	71295000	70877000	29659000	30468000	37335000	36615000	95585000	89727000	79693000	103980000	82508.K1VS60	8.91e-139	446	COG0285@1|root,COG5141@1|root,KOG0958@2759|Eukaryota,KOG2525@2759|Eukaryota,38EFF@33154|Opisthokonta,3NVYP@4751|Fungi,3UZX0@5204|Basidiomycota,3VE84@5234|Tremellales	4751|Fungi	L	Specific transcriptional repressor	NA	NA	NA	NA	JmjC,JmjN,zf-HC5HC2H,zf-HC5HC2H_2	OTHER
335101	By MS/MS	By MS/MS	By MS/MS	By MS/MS	By MS/MS	By MS/MS	By MS/MS	By MS/MS	By MS/MS	By MS/MS	By MS/MS	By MS/MS	122350000	81771000	253410000	250510000	431420000	342220000	279560000	401980000	162120000	157400000	141700000	255810000	39378000	34046000	86731000	90499000	97253000	112060000	56427000	84353000	41587000	39677000	38038000	62747000	5217.XP_007003988.1	1.13e-162	462	COG0647@1|root,KOG2882@2759|Eukaryota,38E0U@33154|Opisthokonta,3NUE7@4751|Fungi,3UZGT@5204|Basidiomycota,3VDX7@5234|Tremellales	4751|Fungi	P	4-nitrophenylphosphatase	NA	NA	ko:K01101	ko00627,ko01120,map00627,map01120	CRAL_TRIO,Hydrolase_6,Hydrolase_like	OTHER
335135	By MS/MS	By MS/MS	By MS/MS	By MS/MS	By MS/MS	By MS/MS	By MS/MS	By MS/MS	By MS/MS	By MS/MS	By MS/MS	By MS/MS	348400000	461550000	542590000	1423800000	283490000	232990000	324730000	398860000	483610000	491130000	655330000	607000000	239060000	301070000	473670000	722200000	159550000	201860000	158500000	201500000	328510000	299230000	355480000	205800000	5217.XP_007001932.1	3.98e-34	121	2DZRD@1|root,2S786@2759|Eukaryota,3A9KQ@33154|Opisthokonta,3P780@4751|Fungi,3V2I6@5204|Basidiomycota,3VH6X@5234|Tremellales	4751|Fungi	S	NADH-ubiquinone oxidoreductase MWFE subunit	NA	NA	NA	NA	MWFE	OTHER
335157	By MS/MS	By MS/MS	By MS/MS	By matching	By matching	By MS/MS	By MS/MS	By MS/MS	By MS/MS	By MS/MS	By MS/MS	By MS/MS	155450000	137260000	159970000	72597000	109910000	82705000	106570000	117570000	168140000	161840000	95632000	153090000	68964000	58496000	46414000	0	40630000	32408000	40464000	30381000	61909000	61642000	60301000	61458000	82508.K1VYH8	3.38e-237	699	COG2265@1|root,KOG3544@1|root,KOG2187@2759|Eukaryota,KOG3544@2759|Eukaryota,38DJB@33154|Opisthokonta,3NVPX@4751|Fungi,3UZC0@5204|Basidiomycota,3VCN5@5234|Tremellales	4751|Fungi	J	Belongs to the class I-like SAM-binding methyltransferase superfamily. RNA M5U methyltransferase family	TRM2	GO:0000014,GO:0001510,GO:0003674,GO:0003824,GO:0004518,GO:0004519,GO:0004520,GO:0004527,GO:0004529,GO:0004536,GO:0006139,GO:0006259,GO:0006396,GO:0006399,GO:0006400,GO:0006725,GO:0006807,GO:0008033,GO:0008150,GO:0008152,GO:0008168,GO:0008173,GO:0008175,GO:0008309,GO:0008409,GO:0009451,GO:0009987,GO:0010467,GO:0016070,GO:0016300,GO:0016740,GO:0016741,GO:0016787,GO:0016788,GO:0016796,GO:0016895,GO:…	ko:K15331	NA	TRAM,tRNA_U5-meth_tr	OTHER
335169	By MS/MS	By MS/MS	By matching	By matching	By MS/MS	By MS/MS	By MS/MS	By MS/MS	By matching	By matching	By matching	By matching	86824000	88869000	103040000	70537000	186550000	279230000	324200000	302740000	19705000	16542000	58814000	43816000	25935000	31859000	32408000	26518000	65089000	89508000	64556000	107750000	0	0	32605000	29506000	552467.XP_003191322.1	2.12e-191	541	COG5020@1|root,KOG4472@2759|Eukaryota,38CI7@33154|Opisthokonta,3NUKP@4751|Fungi,3UXV5@5204|Basidiomycota,3VDMV@5234|Tremellales	4751|Fungi	G	Glycolipid 2-alpha-mannosyltransferase	NA	NA	ko:K10967	ko00514,map00514	Glyco_transf_15	OTHER
335238	NA	NA	NA	NA	NA	NA	NA	By MS/MS	NA	By matching	By matching	By matching	0	0	0	0	0	0	0	42458000	0	19772000	29754000	34222000	0	0	0	0	0	0	0	0	0	0	0	0	82508.K1W4W9	4.77e-273	781	KOG2308@1|root,KOG2308@2759|Eukaryota,38D49@33154|Opisthokonta,3NWQW@4751|Fungi,3UYHZ@5204|Basidiomycota,3VDV2@5234|Tremellales	4751|Fungi	IU	DDHD	NA	GO:0003674,GO:0003824,GO:0004620,GO:0005575,GO:0005622,GO:0005623,GO:0005737,GO:0006629,GO:0008150,GO:0008152,GO:0009056,GO:0009987,GO:0016042,GO:0016298,GO:0016787,GO:0016788,GO:0044237,GO:0044238,GO:0044242,GO:0044248,GO:0044255,GO:0044424,GO:0044464,GO:0071704,GO:1901575	NA	NA	DDHD	OTHER
335257	By matching	By matching	By matching	By matching	By MS/MS	By MS/MS	By MS/MS	By MS/MS	By matching	By matching	By matching	By matching	18688000	17683000	18668000	19011000	94550000	88905000	141180000	119580000	9592800	16147000	10624000	15891000	0	0	0	0	42357000	43423000	59926000	41026000	0	0	0	0	82508.K1WWL6	0	1785	COG1132@1|root,KOG0055@2759|Eukaryota,38E88@33154|Opisthokonta,3NU2T@4751|Fungi,3UZNI@5204|Basidiomycota,3VDSN@5234|Tremellales	4751|Fungi	Q	Multidrug resistance protein 1	NA	NA	ko:K05658	ko02010,ko04976,ko05206,ko05226,map02010,map04976,map05206,map05226	ABC_membrane,ABC_tran	OTHER
335315	By MS/MS	By MS/MS	By MS/MS	By MS/MS	By MS/MS	By MS/MS	By MS/MS	By MS/MS	By MS/MS	By MS/MS	By MS/MS	By MS/MS	839920000	687260000	714300000	766120000	1063700000	847230000	771410000	742720000	857850000	946090000	989430000	738240000	391740000	336700000	336250000	309460000	314590000	286700000	284580000	353480000	334880000	321180000	321160000	358640000	82508.K1VFF5	1.06e-253	711	COG1012@1|root,KOG2451@2759|Eukaryota,38D8C@33154|Opisthokonta,3NVW2@4751|Fungi,3UXZS@5204|Basidiomycota,3VEE3@5234|Tremellales	4751|Fungi	E	Belongs to the aldehyde dehydrogenase family	NA	NA	ko:K00135	ko00250,ko00310,ko00350,ko00650,ko00760,ko01100,ko01120,map00250,map00310,map00350,map00650,map00760,map01100,map01120	Aldedh	OTHER
335400	By MS/MS	By MS/MS	By MS/MS	By matching	By MS/MS	By MS/MS	By MS/MS	By MS/MS	By matching	By matching	By MS/MS	By MS/MS	76377000	73347000	118270000	20078000	74647000	89415000	65558000	101600000	47130000	75387000	79227000	90318000	32885000	33246000	50136000	0	39137000	28245000	36953000	34881000	0	26181000	27515000	31121000	82508.K1VMN2	4.35e-194	565	2CN0Z@1|root,2QT80@2759|Eukaryota,3943N@33154|Opisthokonta,3NY3S@4751|Fungi,3V0NZ@5204|Basidiomycota,3VEMT@5234|Tremellales	4751|Fungi	S	Integral peroxisomal membrane peroxin	NA	GO:0005575,GO:0005622,GO:0005623,GO:0005737,GO:0005777,GO:0005778,GO:0005779,GO:0005783,GO:0005933,GO:0006996,GO:0007031,GO:0008150,GO:0009987,GO:0012505,GO:0016020,GO:0016021,GO:0016043,GO:0031090,GO:0031224,GO:0031231,GO:0031300,GO:0031301,GO:0031903,GO:0032581,GO:0042579,GO:0043226,GO:0043227,GO:0043229,GO:0043231,GO:0044422,GO:0044424,GO:0044425,GO:0044438,GO:0044439,GO:0044444,GO:0044446,GO:…	NA	NA	Pex24p	OTHER
335460	By MS/MS	By MS/MS	By MS/MS	By MS/MS	By MS/MS	By MS/MS	By MS/MS	By MS/MS	By MS/MS	By MS/MS	By MS/MS	By MS/MS	1168500000	1048800000	1213900000	953540000	1566400000	1199200000	1364300000	1322200000	882730000	1017800000	1106300000	1122100000	230900000	226620000	227590000	274540000	180700000	222590000	178920000	193140000	220830000	226050000	205720000	231940000	82508.K1WE07	0	1081	COG0639@1|root,KOG0375@2759|Eukaryota,38BQG@33154|Opisthokonta,3NTWU@4751|Fungi,3UZX4@5204|Basidiomycota,3VD3M@5234|Tremellales	4751|Fungi	T	Protein phosphatase 2A homologues, catalytic domain.	NA	NA	ko:K04348	ko04010,ko04020,ko04022,ko04114,ko04218,ko04310,ko04360,ko04370,ko04380,ko04650,ko04658,ko04659,ko04660,ko04662,ko04720,ko04724,ko04728,ko04921,ko04922,ko04924,ko05010,ko05014,ko05031,ko05152,ko05166,ko05167,map04010,map04020,map04022,map04114,map04218,map04310,map04360,map04370,map04380,map04650,map04658,map04659,map04660,map04662,map04720,map04724,map04728,map04921,map04922,map04924,map05010,ma…	Metallophos	OTHER
335524	By matching	By matching	By MS/MS	NA	By matching	By matching	NA	By MS/MS	By matching	By matching	By matching	By matching	14618000	22775000	21976000	0	18566000	17724000	0	33231000	24691000	14690000	12164000	27405000	0	0	0	0	0	0	0	0	0	0	0	0	5217.XP_007003782.1	0	1095	COG0659@1|root,KOG0236@2759|Eukaryota,38G54@33154|Opisthokonta,3NZ2M@4751|Fungi,3UY34@5204|Basidiomycota,3VD7U@5234|Tremellales	4751|Fungi	P	STAS domain	NA	GO:0000322,GO:0000323,GO:0000324,GO:0003674,GO:0005215,GO:0005575,GO:0005622,GO:0005623,GO:0005737,GO:0005773,GO:0005886,GO:0005887,GO:0006810,GO:0006811,GO:0006820,GO:0008150,GO:0008272,GO:0008509,GO:0015075,GO:0015103,GO:0015116,GO:0015318,GO:0015698,GO:0016020,GO:0016021,GO:0022857,GO:0031224,GO:0031226,GO:0034220,GO:0043226,GO:0043227,GO:0043229,GO:0043231,GO:0044424,GO:0044425,GO:0044444,GO:…	ko:K03321	NA	STAS,Sulfate_transp,cNMP_binding	OTHER
335553	By MS/MS	By MS/MS	By MS/MS	By MS/MS	By MS/MS	By MS/MS	By MS/MS	By MS/MS	By MS/MS	By MS/MS	By MS/MS	By MS/MS	439000000	418820000	657580000	487140000	791120000	796850000	930340000	838580000	416140000	595500000	514860000	352040000	141230000	156840000	151530000	142150000	116570000	133350000	125530000	121080000	115680000	131900000	132390000	122230000	5207.AAW44451	0	1067	KOG2220@1|root,KOG2220@2759|Eukaryota,38CYR@33154|Opisthokonta,3NUZ5@4751|Fungi,3UZAJ@5204|Basidiomycota,3VDH8@5234|Tremellales	4751|Fungi	S	BRO1-like domain	RIM20	GO:0000815,GO:0001403,GO:0005575,GO:0005622,GO:0005623,GO:0005634,GO:0005737,GO:0005768,GO:0005886,GO:0006082,GO:0006508,GO:0006790,GO:0006807,GO:0006810,GO:0008150,GO:0008152,GO:0009058,GO:0009268,GO:0009308,GO:0009405,GO:0009628,GO:0009653,GO:0009889,GO:0009891,GO:0009893,GO:0009987,GO:0010008,GO:0010035,GO:0010038,GO:0010226,GO:0010467,GO:0010565,GO:0010570,GO:0012505,GO:0016020,GO:0016053,GO:…	ko:K12200	ko04144,map04144	ALIX_LYPXL_bnd,BRO1	OTHER
335708	NA	By matching	By matching	By matching	By matching	By MS/MS	By MS/MS	By MS/MS	By matching	By matching	By MS/MS	By matching	0	22718000	36276000	29364000	23975000	33467000	31338000	42847000	20231000	29993000	35797000	30861000	0	0	0	0	0	0	0	0	0	0	0	0	82508.K1VFF4	0	1979	KOG3572@1|root,KOG3572@2759|Eukaryota,38E71@33154|Opisthokonta,3NX2D@4751|Fungi,3UZUF@5204|Basidiomycota,3VDFT@5234|Tremellales	4751|Fungi	T	Pfam:DUF3608	IML1	GO:0000306,GO:0000322,GO:0000323,GO:0000324,GO:0000329,GO:0003674,GO:0005096,GO:0005575,GO:0005622,GO:0005623,GO:0005737,GO:0005773,GO:0005774,GO:0006950,GO:0006995,GO:0007154,GO:0008047,GO:0008150,GO:0009267,GO:0009605,GO:0009893,GO:0009894,GO:0009896,GO:0009966,GO:0009968,GO:0009987,GO:0009991,GO:0010506,GO:0010508,GO:0010646,GO:0010648,GO:0016020,GO:0016241,GO:0019222,GO:0019898,GO:0023051,GO:…	ko:K20404	ko04150,map04150	DEP,IML1	OTHER
335721	By MS/MS	By MS/MS	By MS/MS	By MS/MS	By matching	By MS/MS	By MS/MS	By matching	By MS/MS	By MS/MS	By MS/MS	By MS/MS	117310000	177510000	139880000	179060000	80910000	95154000	147280000	70774000	137320000	208240000	230970000	148330000	37862000	62284000	53352000	48186000	0	27197000	45265000	0	37985000	50662000	68038000	48091000	82508.K1VS01	0	919	COG0531@1|root,KOG1286@2759|Eukaryota,38DMK@33154|Opisthokonta,3NUN0@4751|Fungi,3UYRJ@5204|Basidiomycota,3VHGM@5234|Tremellales	4751|Fungi	E	Amino acid permease	inda1	NA	ko:K16261	NA	AA_permease	OTHER
335731	By MS/MS	By MS/MS	By MS/MS	By MS/MS	By MS/MS	By MS/MS	By matching	By MS/MS	By matching	By matching	By matching	By matching	39837000	31882000	44674000	21708000	83763000	77938000	54641000	57953000	24837000	23978000	43299000	28081000	0	0	0	0	0	0	0	0	0	0	0	0	5217.XP_007006301.1	2.77e-88	266	KOG4143@1|root,KOG4143@2759|Eukaryota,39FR5@33154|Opisthokonta,3NY94@4751|Fungi,3V0AH@5204|Basidiomycota,3VEX4@5234|Tremellales	4751|Fungi	T	ERG2 and Sigma1 receptor like protein	ERG2	GO:0000247,GO:0003674,GO:0003824,GO:0005575,GO:0005622,GO:0005623,GO:0005737,GO:0005783,GO:0006066,GO:0006629,GO:0006694,GO:0006696,GO:0008150,GO:0008152,GO:0008202,GO:0008204,GO:0008610,GO:0009058,GO:0009987,GO:0012505,GO:0016125,GO:0016126,GO:0016128,GO:0016129,GO:0016853,GO:0016860,GO:0016863,GO:0043226,GO:0043227,GO:0043229,GO:0043231,GO:0044107,GO:0044108,GO:0044237,GO:0044238,GO:0044249,GO:…	ko:K09829	ko00100,ko01100,ko01130,map00100,map01100,map01130	ERG2_Sigma1R	OTHER
335749	By MS/MS	By MS/MS	By MS/MS	By MS/MS	By MS/MS	By MS/MS	By MS/MS	By matching	By MS/MS	By MS/MS	By MS/MS	By MS/MS	50948000	19118000	21046000	19794000	47564000	47437000	34402000	43066000	36358000	44220000	36963000	76929000	38436000	0	0	0	0	29102000	0	0	0	0	0	44527000	552467.XP_003192541.1	4.93e-48	160	KOG3335@1|root,KOG3335@2759|Eukaryota,3A5YM@33154|Opisthokonta,3P56Z@4751|Fungi,3V6CC@5204|Basidiomycota,3VFM9@5234|Tremellales	4751|Fungi	S	Optic atrophy 3 protein (OPA3)	NA	GO:0005575,GO:0005622,GO:0005623,GO:0005737,GO:0005739,GO:0008150,GO:0019216,GO:0019222,GO:0043226,GO:0043227,GO:0043229,GO:0043231,GO:0044424,GO:0044444,GO:0044464,GO:0050789,GO:0065007,GO:0080090	NA	NA	OPA3	OTHER
335787	By matching	NA	By matching	By matching	By MS/MS	By MS/MS	By matching	By matching	NA	NA	NA	By matching	334990000	0	324220000	300330000	350820000	225920000	276400000	250740000	0	0	0	137780000	0	0	0	0	0	0	0	0	0	0	0	0	202698.XP_007387798.1	6.64e-31	116	2C6JF@1|root,2SQQ6@2759|Eukaryota,3AQFG@33154|Opisthokonta,3PEEW@4751|Fungi,3V60S@5204|Basidiomycota,22EAZ@155619|Agaricomycetes,3H8CA@355688|Agaricomycetes incertae sedis	4751|Fungi	-	-	NA	NA	NA	NA	-	SP
335858	By MS/MS	By MS/MS	By MS/MS	By MS/MS	By MS/MS	By MS/MS	By MS/MS	By MS/MS	By MS/MS	By MS/MS	By MS/MS	By MS/MS	6762800000	6692000000	5946500000	6155400000	8024200000	6584500000	8199700000	9240400000	6639200000	7380200000	8506000000	5931000000	1493500000	1694500000	1455900000	1655900000	1371400000	1365100000	1452600000	1560100000	1618000000	1605300000	1797300000	1418700000	552467.XP_003191404.1	1.54e-249	686	COG0174@1|root,KOG0683@2759|Eukaryota,38F54@33154|Opisthokonta,3NVDA@4751|Fungi,3UZD6@5204|Basidiomycota,3VCSR@5234|Tremellales	4751|Fungi	E	Glutamine synthetase, beta-Grasp domain	GLN1	GO:0003674,GO:0003824,GO:0004356,GO:0005575,GO:0005622,GO:0005623,GO:0005634,GO:0005737,GO:0006082,GO:0006520,GO:0006536,GO:0006541,GO:0006542,GO:0006807,GO:0008150,GO:0008152,GO:0008652,GO:0009058,GO:0009064,GO:0009084,GO:0009987,GO:0016053,GO:0016211,GO:0016874,GO:0016879,GO:0016880,GO:0019676,GO:0019740,GO:0019752,GO:0031974,GO:0031981,GO:0034399,GO:0043226,GO:0043227,GO:0043229,GO:0043231,GO:…	ko:K01915	ko00220,ko00250,ko00630,ko00910,ko01100,ko01120,ko01230,ko02020,ko04217,ko04724,ko04727,map00220,map00250,map00630,map00910,map01100,map01120,map01230,map02020,map04217,map04724,map04727	Gln-synt_C,Gln-synt_N	OTHER
335912	By MS/MS	By MS/MS	By MS/MS	By MS/MS	By MS/MS	By MS/MS	By MS/MS	By MS/MS	By MS/MS	By MS/MS	By MS/MS	By MS/MS	7166500000	5614700000	7992600000	6215800000	1759500000	1783800000	2371100000	1883300000	7818700000	8368700000	9498300000	8395500000	2165500000	1859000000	1935400000	1815700000	565770000	492400000	535240000	482930000	2083900000	2031200000	2057000000	2016200000	5207.AAW40904	1.13e-211	595	COG0022@1|root,KOG0525@2759|Eukaryota,38BVR@33154|Opisthokonta,3NV7X@4751|Fungi,3UY3M@5204|Basidiomycota,3VDCF@5234|Tremellales	4751|Fungi	C	pyruvate dehydrogenase (acetyl-transferring)	NA	NA	ko:K00167	ko00280,ko00640,ko01100,ko01110,ko01130,map00280,map00640,map01100,map01110,map01130	Transket_pyr,Transketolase_C	OTHER
335984	NA	NA	NA	NA	By MS/MS	By MS/MS	By MS/MS	By MS/MS	NA	NA	NA	NA	0	0	0	0	203380000	182200000	170490000	202540000	0	0	0	0	0	0	0	0	0	0	0	0	0	0	0	0	5217.XP_007008352.1	4.64e-96	280	COG5391@1|root,KOG2527@2759|Eukaryota,38XF0@33154|Opisthokonta,3P1WX@4751|Fungi,3V0J8@5204|Basidiomycota,3VF2C@5234|Tremellales	4751|Fungi	U	PhoX homologous domain, present in p47phox and p40phox.	SNX3	GO:0000322,GO:0000323,GO:0000324,GO:0000329,GO:0000407,GO:0003674,GO:0005488,GO:0005543,GO:0005575,GO:0005622,GO:0005623,GO:0005737,GO:0005768,GO:0005773,GO:0005774,GO:0005829,GO:0006810,GO:0006886,GO:0006897,GO:0006914,GO:0006996,GO:0008104,GO:0008150,GO:0008152,GO:0008289,GO:0009056,GO:0009987,GO:0012505,GO:0015031,GO:0015833,GO:0016020,GO:0016043,GO:0016050,GO:0016192,GO:0016197,GO:0016482,GO:…	ko:K17918	ko04144,map04144	PX	OTHER
336101	By MS/MS	By MS/MS	By MS/MS	By MS/MS	By MS/MS	By MS/MS	By MS/MS	By MS/MS	By MS/MS	By MS/MS	By MS/MS	By MS/MS	437820000	412090000	305650000	369920000	448240000	447690000	515320000	654850000	410160000	507470000	496550000	421930000	116690000	128020000	93896000	115480000	92726000	127840000	110810000	118790000	134420000	118930000	139300000	93210000	552467.XP_003195638.1	8.82e-130	384	COG5200@1|root,KOG0796@2759|Eukaryota,38DNS@33154|Opisthokonta,3NVIA@4751|Fungi,3UZA7@5204|Basidiomycota,3VEKS@5234|Tremellales	4751|Fungi	A	small nuclear ribonucleoprotein	LUC7	GO:0000245,GO:0000375,GO:0000377,GO:0000395,GO:0000398,GO:0003674,GO:0003676,GO:0003723,GO:0003729,GO:0005488,GO:0005575,GO:0005622,GO:0005623,GO:0005634,GO:0005681,GO:0005684,GO:0005685,GO:0005737,GO:0005829,GO:0006139,GO:0006376,GO:0006396,GO:0006397,GO:0006725,GO:0006807,GO:0008150,GO:0008152,GO:0008380,GO:0009987,GO:0010467,GO:0016043,GO:0016070,GO:0016071,GO:0022607,GO:0022613,GO:0022618,GO:…	NA	NA	LUC7	OTHER
336104	By MS/MS	By MS/MS	By MS/MS	By MS/MS	By MS/MS	By MS/MS	By MS/MS	By MS/MS	By MS/MS	By MS/MS	By MS/MS	By MS/MS	38991000	35035000	34647000	43629000	100440000	84683000	86328000	80691000	37905000	73458000	45181000	73876000	0	0	0	0	28120000	0	0	0	0	29503000	0	0	552467.XP_003192392.1	1.24e-131	384	COG2131@1|root,KOG3127@2759|Eukaryota,38HPY@33154|Opisthokonta,3NVNV@4751|Fungi,3V00Z@5204|Basidiomycota,3VFY8@5234|Tremellales	4751|Fungi	F	dCMP deaminase	DCD1	GO:0003674,GO:0003824,GO:0004132,GO:0005575,GO:0005622,GO:0005623,GO:0005737,GO:0006139,GO:0006220,GO:0006221,GO:0006226,GO:0006231,GO:0006725,GO:0006753,GO:0006793,GO:0006796,GO:0006807,GO:0008150,GO:0008152,GO:0009058,GO:0009117,GO:0009123,GO:0009124,GO:0009129,GO:0009130,GO:0009157,GO:0009162,GO:0009165,GO:0009176,GO:0009177,GO:0009219,GO:0009221,GO:0009262,GO:0009263,GO:0009265,GO:0009394,GO:…	ko:K01493	ko00240,ko01100,map00240,map01100	dCMP_cyt_deam_1	OTHER
336164	By MS/MS	By MS/MS	By MS/MS	By MS/MS	By MS/MS	By MS/MS	By MS/MS	By MS/MS	By MS/MS	By MS/MS	By MS/MS	By MS/MS	550120000	726340000	743840000	547470000	2368700000	2022700000	2634900000	2515000000	755310000	880620000	924370000	1167900000	328880000	446720000	350640000	307320000	781740000	779930000	878000000	764700000	431600000	469680000	421450000	474820000	5207.AAW42366	3.15e-177	515	COG1230@1|root,KOG1483@2759|Eukaryota,38CHY@33154|Opisthokonta,3NV9V@4751|Fungi,3UY0Z@5204|Basidiomycota,3VEU6@5234|Tremellales	4751|Fungi	P	Cation efflux family	ZRC1	GO:0000041,GO:0000322,GO:0000323,GO:0000324,GO:0000329,GO:0003674,GO:0005215,GO:0005385,GO:0005575,GO:0005622,GO:0005623,GO:0005737,GO:0005739,GO:0005773,GO:0005774,GO:0005783,GO:0005789,GO:0006810,GO:0006811,GO:0006812,GO:0006824,GO:0006829,GO:0006873,GO:0006875,GO:0006877,GO:0006882,GO:0006950,GO:0008150,GO:0008324,GO:0009636,GO:0009987,GO:0010035,GO:0010038,GO:0010043,GO:0012505,GO:0015075,GO:…	ko:K14688	ko04978,map04978	Cation_efflux	OTHER
336167	By matching	NA	By matching	By matching	NA	By MS/MS	By MS/MS	By matching	NA	By matching	NA	NA	56619000	0	110370000	111260000	0	124060000	113510000	136990000	0	101180000	0	0	0	0	0	0	0	0	0	0	0	0	0	0	5217.XP_007007663.1	5.82e-38	130	KOG3385@1|root,KOG3385@2759|Eukaryota,3A3TB@33154|Opisthokonta,3P3FI@4751|Fungi,3V1RS@5204|Basidiomycota,3VH2T@5234|Tremellales	4751|Fungi	U	Protein transport protein bet1	BET1	GO:0003674,GO:0005484,GO:0005488,GO:0005515,GO:0005575,GO:0005622,GO:0005623,GO:0005737,GO:0005783,GO:0005789,GO:0005798,GO:0006810,GO:0006886,GO:0006888,GO:0006890,GO:0006906,GO:0006996,GO:0008104,GO:0008150,GO:0009987,GO:0012505,GO:0015031,GO:0015833,GO:0016020,GO:0016021,GO:0016043,GO:0016050,GO:0016192,GO:0030134,GO:0030135,GO:0031201,GO:0031224,GO:0031410,GO:0031982,GO:0031984,GO:0032991,GO:…	ko:K08504	ko04130,map04130	-	OTHER
336294	By matching	By MS/MS	By MS/MS	By MS/MS	By MS/MS	By MS/MS	By MS/MS	By MS/MS	By matching	By MS/MS	By MS/MS	By matching	51188000	133120000	158900000	209900000	318330000	195090000	367940000	372490000	126390000	159140000	182620000	124700000	0	54626000	56469000	66677000	67048000	71140000	77579000	68450000	57487000	70336000	51922000	57592000	82508.K1VXG8	2.14e-226	656	28P6R@1|root,2QVTM@2759|Eukaryota,39RKX@33154|Opisthokonta,3NX9I@4751|Fungi,3V1JN@5204|Basidiomycota,3VEB6@5234|Tremellales	4751|Fungi	K	complex subunit rsc9	RSC9	GO:0000122,GO:0000228,GO:0000302,GO:0000785,GO:0000790,GO:0001067,GO:0003674,GO:0003676,GO:0003677,GO:0005488,GO:0005575,GO:0005622,GO:0005623,GO:0005634,GO:0005694,GO:0006139,GO:0006325,GO:0006333,GO:0006337,GO:0006338,GO:0006342,GO:0006351,GO:0006354,GO:0006355,GO:0006357,GO:0006360,GO:0006366,GO:0006368,GO:0006725,GO:0006807,GO:0006950,GO:0006979,GO:0006996,GO:0008150,GO:0008152,GO:0009058,GO:…	ko:K11763	NA	ARID	OTHER
336357	By MS/MS	By MS/MS	By MS/MS	By MS/MS	By MS/MS	By MS/MS	By MS/MS	By MS/MS	By MS/MS	By MS/MS	By MS/MS	By MS/MS	745130000	486590000	839970000	700990000	1484100000	1998800000	1489400000	1806600000	1225400000	1025200000	831790000	1718200000	236520000	195540000	224510000	212150000	240020000	283800000	251590000	240600000	240690000	282760000	214510000	343810000	82508.K1VMS7	1.1e-306	871	COG5594@1|root,KOG1134@2759|Eukaryota,38BVW@33154|Opisthokonta,3NW23@4751|Fungi,3V39N@5204|Basidiomycota,3VCUD@5234|Tremellales	4751|Fungi	S	Extracellular tail, of 10TM putative phosphate transporter	PHM7	GO:0000322,GO:0000323,GO:0000324,GO:0000329,GO:0005575,GO:0005622,GO:0005623,GO:0005737,GO:0005773,GO:0005774,GO:0005783,GO:0006810,GO:0006892,GO:0006893,GO:0008150,GO:0012505,GO:0016020,GO:0016021,GO:0016192,GO:0031090,GO:0031224,GO:0043226,GO:0043227,GO:0043229,GO:0043231,GO:0044422,GO:0044424,GO:0044425,GO:0044437,GO:0044444,GO:0044446,GO:0044464,GO:0048193,GO:0051179,GO:0051234,GO:0071944,GO:…	ko:K21989	NA	PHM7_cyt,PHM7_ext,RSN1_7TM,RSN1_TM	OTHER
336389	By MS/MS	By MS/MS	By MS/MS	By MS/MS	By MS/MS	By MS/MS	By MS/MS	By MS/MS	By MS/MS	By MS/MS	By MS/MS	By MS/MS	646010000	583210000	717860000	359490000	952760000	1105100000	816930000	1225200000	619590000	816460000	742460000	486150000	284260000	310260000	282220000	273360000	302680000	580910000	282560000	395330000	388790000	359030000	302060000	301530000	82508.K1VP09	3.73e-131	378	COG0120@1|root,KOG3075@2759|Eukaryota,38HSY@33154|Opisthokonta,3NWRM@4751|Fungi,3UYCK@5204|Basidiomycota,3VCWW@5234|Tremellales	4751|Fungi	G	Ribose 5-phosphate isomerase A (phosphoriboisomerase A)	RKI1	GO:0003674,GO:0003824,GO:0004751,GO:0005575,GO:0005622,GO:0005623,GO:0005634,GO:0005737,GO:0005975,GO:0005996,GO:0006014,GO:0006081,GO:0006098,GO:0006139,GO:0006725,GO:0006732,GO:0006733,GO:0006739,GO:0006753,GO:0006766,GO:0006767,GO:0006793,GO:0006796,GO:0006807,GO:0008150,GO:0008152,GO:0008614,GO:0008615,GO:0009052,GO:0009058,GO:0009110,GO:0009117,GO:0009987,GO:0016853,GO:0016860,GO:0016861,GO:…	ko:K01807	ko00030,ko00710,ko01100,ko01110,ko01120,ko01130,ko01200,ko01230,map00030,map00710,map01100,map01110,map01120,map01130,map01200,map01230	Rib_5-P_isom_A	OTHER
336473	By MS/MS	By MS/MS	By MS/MS	By MS/MS	By MS/MS	By MS/MS	By MS/MS	By MS/MS	By MS/MS	By MS/MS	By MS/MS	By MS/MS	96325000	107130000	176210000	171610000	213150000	211330000	194360000	164030000	116090000	134050000	97685000	136250000	76642000	84746000	0	0	79721000	83503000	81171000	0	74073000	95960000	52717000	73025000	5217.XP_007006408.1	2.23e-118	339	COG1100@1|root,KOG0072@2759|Eukaryota,38G98@33154|Opisthokonta,3NWAZ@4751|Fungi,3UZ35@5204|Basidiomycota,3VEQK@5234|Tremellales	4751|Fungi	U	Belongs to the small GTPase superfamily. Arf family	ARL1	GO:0000045,GO:0003674,GO:0003824,GO:0003924,GO:0005575,GO:0005622,GO:0005623,GO:0005737,GO:0005794,GO:0005802,GO:0005829,GO:0006605,GO:0006623,GO:0006810,GO:0006886,GO:0006892,GO:0006893,GO:0006897,GO:0006914,GO:0006950,GO:0006996,GO:0007033,GO:0007034,GO:0008104,GO:0008150,GO:0008152,GO:0009056,GO:0009987,GO:0012505,GO:0015031,GO:0015833,GO:0016043,GO:0016192,GO:0016236,GO:0016462,GO:0016787,GO:…	ko:K07942	NA	Arf	OTHER
336483	By MS/MS	By MS/MS	By MS/MS	By MS/MS	By MS/MS	By MS/MS	By MS/MS	By MS/MS	By MS/MS	By MS/MS	By MS/MS	By MS/MS	7331400000	7285100000	5975900000	5220000000	5169700000	4063100000	5357400000	6518000000	7602100000	8617300000	8363000000	7881900000	1167400000	1359300000	1060200000	1018200000	753400000	777560000	670250000	878730000	1268300000	1257200000	1153800000	1238600000	82508.K1W7L3	1.67e-146	428	KOG3378@1|root,KOG3378@2759|Eukaryota,39SRH@33154|Opisthokonta,3NWBB@4751|Fungi,3V851@5204|Basidiomycota,3VGQK@5234|Tremellales	4751|Fungi	C	Oxidoreductase FAD-binding domain	YHB1	GO:0000166,GO:0001505,GO:0003674,GO:0003824,GO:0005488,GO:0005575,GO:0005622,GO:0005623,GO:0005634,GO:0005737,GO:0005739,GO:0005759,GO:0005829,GO:0006807,GO:0006950,GO:0006979,GO:0008150,GO:0008152,GO:0008941,GO:0009056,GO:0009405,GO:0009605,GO:0009607,GO:0009636,GO:0009987,GO:0010033,GO:0010494,GO:0016491,GO:0016661,GO:0016662,GO:0016705,GO:0016708,GO:0016966,GO:0017144,GO:0030447,GO:0031974,GO:…	ko:K04563,ko:K05916	ko04011,ko04111,ko04113,ko05132,map04011,map04111,map04113,map05132	FAD_binding_6,Globin,NAD_binding_1	OTHER
336496	By matching	By matching	By MS/MS	By matching	By MS/MS	By MS/MS	By MS/MS	NA	By matching	By matching	By matching	By matching	26014000	19590000	18200000	15662000	17238000	28342000	41381000	0	25982000	18603000	26947000	30904000	0	0	0	0	0	0	0	0	0	0	0	0	82508.K1VPH2	3.63e-284	816	2A1TB@1|root,2RY1H@2759|Eukaryota,3A152@33154|Opisthokonta,3P2DC@4751|Fungi,3V0GE@5204|Basidiomycota,3VDNA@5234|Tremellales	4751|Fungi	S	Spizellomyces punctatus DAOM BR117	NA	NA	NA	NA	-	OTHER
336502	By matching	By MS/MS	By MS/MS	By MS/MS	By MS/MS	By MS/MS	By MS/MS	By MS/MS	By MS/MS	By MS/MS	By MS/MS	By MS/MS	58247000	37755000	69361000	83562000	224510000	165840000	208760000	124840000	83582000	89263000	108000000	54432000	46563000	38541000	46181000	62749000	56195000	86722000	53046000	44518000	59821000	62471000	44549000	0	82508.K1VVV0	5.16e-273	779	KOG0578@1|root,KOG0578@2759|Eukaryota,38BIW@33154|Opisthokonta,3NTWY@4751|Fungi,3UZM7@5204|Basidiomycota,3VE8S@5234|Tremellales	4751|Fungi	T	P21-Rho-binding domain	NA	GO:0000910,GO:0001932,GO:0001934,GO:0003674,GO:0003824,GO:0004672,GO:0004674,GO:0005488,GO:0005515,GO:0005575,GO:0005622,GO:0005623,GO:0005737,GO:0005819,GO:0005826,GO:0005856,GO:0005874,GO:0005876,GO:0005938,GO:0006464,GO:0006468,GO:0006793,GO:0006796,GO:0006807,GO:0006950,GO:0006996,GO:0007010,GO:0007049,GO:0007154,GO:0007165,GO:0007264,GO:0007265,GO:0007266,GO:0007346,GO:0008047,GO:0008150,GO:…	ko:K04409	ko04010,ko04011,ko04012,ko04014,ko04024,ko04062,ko04360,ko04392,ko04510,ko04650,ko04660,ko04666,ko04810,ko05120,ko05205,ko05211,map04010,map04011,map04012,map04014,map04024,map04062,map04360,map04392,map04510,map04650,map04660,map04666,map04810,map05120,map05205,map05211	PBD,Pkinase	OTHER
336551	By MS/MS	By MS/MS	By MS/MS	By MS/MS	By MS/MS	By MS/MS	By MS/MS	By MS/MS	By MS/MS	By MS/MS	By MS/MS	By MS/MS	3993900000	3745600000	3607800000	3189000000	4465300000	5040100000	5240100000	5185200000	3846000000	4413700000	4278200000	5023600000	1103100000	969980000	980850000	846660000	723980000	956610000	824750000	803850000	918630000	901320000	858130000	981470000	82508.K1W563	3.33e-263	723	COG0515@1|root,KOG0658@2759|Eukaryota,38D5S@33154|Opisthokonta,3NU1R@4751|Fungi,3UYXK@5204|Basidiomycota,3VEDC@5234|Tremellales	4751|Fungi	T	Serine/Threonine protein kinases, catalytic domain	gsk3	GO:0000003,GO:0003006,GO:0003674,GO:0003824,GO:0004672,GO:0004674,GO:0004712,GO:0004713,GO:0005575,GO:0005622,GO:0005623,GO:0005737,GO:0006464,GO:0006468,GO:0006508,GO:0006793,GO:0006796,GO:0006807,GO:0006950,GO:0006970,GO:0007049,GO:0007088,GO:0007346,GO:0008150,GO:0008152,GO:0009266,GO:0009408,GO:0009628,GO:0009651,GO:0009653,GO:0009894,GO:0009987,GO:0010564,GO:0016301,GO:0016310,GO:0016740,GO:…	ko:K03083,ko:K08282,ko:K12766	ko01521,ko04012,ko04062,ko04110,ko04113,ko04150,ko04151,ko04310,ko04340,ko04341,ko04360,ko04390,ko04510,ko04550,ko04657,ko04660,ko04662,ko04711,ko04722,ko04728,ko04910,ko04916,ko04917,ko04919,ko04931,ko04932,ko04934,ko05010,ko05160,ko05162,ko05164,ko05165,ko05166,ko05167,ko05169,ko05200,ko05210,ko05213,ko05215,ko05217,ko05224,ko05225,ko05226,map01521,map04012,map04062,map04110,map04113,map04150,m…	Pkinase	OTHER
336629	By MS/MS	By MS/MS	By MS/MS	By MS/MS	By MS/MS	By MS/MS	By MS/MS	By MS/MS	By MS/MS	By MS/MS	By MS/MS	By MS/MS	951970000	1152100000	1119600000	969750000	3143200000	3065400000	3702900000	3831500000	1133800000	1156900000	1370200000	966070000	346850000	423550000	394690000	319890000	768760000	911260000	826510000	808400000	352140000	333720000	340080000	457210000	5217.XP_007001051.1	2.38e-98	290	COG0225@1|root,KOG1635@2759|Eukaryota,39U04@33154|Opisthokonta,3P2RD@4751|Fungi,3V0RY@5204|Basidiomycota,3VFUV@5234|Tremellales	4751|Fungi	O	Peptide methionine sulfoxide reductase	NA	NA	ko:K07304	NA	PMSR	OTHER
336667	By MS/MS	By MS/MS	By MS/MS	By MS/MS	By MS/MS	By MS/MS	By MS/MS	By MS/MS	By MS/MS	By MS/MS	By MS/MS	By MS/MS	1534800000	1523000000	1662700000	1115500000	2285300000	1910000000	1971100000	2323000000	1545700000	1626000000	1946500000	1793700000	256220000	255440000	320200000	236500000	281520000	293220000	244990000	256610000	284030000	243450000	268860000	264930000	552467.XP_003195360.1	6.22000000211721e-315	866	COG0459@1|root,KOG0358@2759|Eukaryota,39NW1@33154|Opisthokonta,3NW0D@4751|Fungi,3UZMB@5204|Basidiomycota,3VDD1@5234|Tremellales	4751|Fungi	O	assists the folding of proteins upon ATP hydrolysis	CCT4	GO:0000166,GO:0003674,GO:0005488,GO:0005515,GO:0005524,GO:0005575,GO:0005622,GO:0005623,GO:0005737,GO:0005829,GO:0005832,GO:0005856,GO:0006457,GO:0006458,GO:0008144,GO:0008150,GO:0009987,GO:0017076,GO:0030554,GO:0032553,GO:0032555,GO:0032559,GO:0032991,GO:0035639,GO:0036094,GO:0043167,GO:0043168,GO:0043226,GO:0043228,GO:0043229,GO:0043232,GO:0044183,GO:0044424,GO:0044444,GO:0044445,GO:0044464,GO:…	ko:K09496	NA	Cpn60_TCP1	OTHER
336698	By MS/MS	By MS/MS	By MS/MS	By MS/MS	By MS/MS	By MS/MS	By MS/MS	By MS/MS	By MS/MS	By MS/MS	By MS/MS	By MS/MS	138030000	154440000	182790000	187620000	84750000	95384000	132760000	200290000	156030000	176860000	190960000	114150000	42260000	42383000	43224000	57765000	25471000	31862000	27751000	36926000	40674000	41350000	39556000	46633000	552467.XP_003191686.1	4.87e-193	542	COG0418@1|root,KOG2902@2759|Eukaryota,38HVG@33154|Opisthokonta,3NU7X@4751|Fungi,3UYBF@5204|Basidiomycota,3VCX8@5234|Tremellales	4751|Fungi	F	Dihydroorotase	URA4	GO:0003674,GO:0003824,GO:0004151,GO:0005575,GO:0005622,GO:0005623,GO:0005634,GO:0005737,GO:0006139,GO:0006206,GO:0006207,GO:0006220,GO:0006221,GO:0006725,GO:0006753,GO:0006793,GO:0006796,GO:0006807,GO:0008150,GO:0008152,GO:0009058,GO:0009112,GO:0009117,GO:0009165,GO:0009987,GO:0016787,GO:0016810,GO:0016812,GO:0018130,GO:0019438,GO:0019637,GO:0019856,GO:0034641,GO:0034654,GO:0043226,GO:0043227,GO:…	ko:K01465	ko00240,ko01100,map00240,map01100	Amidohydro_1,Amidohydro_2	OTHER
336784	NA	NA	NA	NA	NA	By MS/MS	NA	NA	By MS/MS	NA	NA	By matching	0	0	0	0	0	19166000	0	0	42875000	0	0	26332000	0	0	0	0	0	0	0	0	0	0	0	0	82508.K1W5X6	8.53e-151	439	KOG0752@1|root,KOG0752@2759|Eukaryota,38FYG@33154|Opisthokonta,3NU65@4751|Fungi,3UZJF@5204|Basidiomycota,3VCTS@5234|Tremellales	4751|Fungi	C	Belongs to the mitochondrial carrier (TC 2.A.29) family	NA	GO:0000295,GO:0003674,GO:0005215,GO:0005346,GO:0005575,GO:0005622,GO:0005623,GO:0005737,GO:0005739,GO:0005740,GO:0005743,GO:0006810,GO:0006811,GO:0006820,GO:0006839,GO:0006862,GO:0008150,GO:0008509,GO:0008514,GO:0015075,GO:0015215,GO:0015216,GO:0015605,GO:0015711,GO:0015748,GO:0015865,GO:0015868,GO:0015931,GO:0015932,GO:0016020,GO:0016021,GO:0019866,GO:0022857,GO:0031090,GO:0031224,GO:0031966,GO:…	ko:K14137,ko:K14684	NA	Mito_carr	OTHER
336836	By MS/MS	By MS/MS	By MS/MS	By MS/MS	By MS/MS	By matching	By MS/MS	By MS/MS	By MS/MS	By MS/MS	By MS/MS	By MS/MS	154340000	39894000	121160000	152590000	272590000	177850000	196840000	226790000	82730000	77255000	99408000	118500000	62715000	0	65863000	78207000	83163000	0	0	0	52629000	0	0	0	82508.K1V6Q9	2.29e-176	515	COG2124@1|root,KOG0157@2759|Eukaryota,38BG9@33154|Opisthokonta,3NXAM@4751|Fungi,3V00V@5204|Basidiomycota	4751|Fungi	IQ	cytochrome p450	NA	NA	NA	NA	p450	OTHER
336854	By MS/MS	By matching	By matching	By matching	By MS/MS	By MS/MS	By MS/MS	By MS/MS	By matching	By MS/MS	By MS/MS	By matching	142490000	86110000	133930000	21330000	220210000	106540000	145100000	234670000	95826000	180520000	197860000	69924000	50111000	49083000	47378000	0	59960000	87753000	72281000	55897000	53245000	49467000	59535000	52900000	82508.K1VPY3	1.88e-76	238	COG5208@1|root,KOG1657@2759|Eukaryota,39X08@33154|Opisthokonta,3NY2K@4751|Fungi,3V20R@5204|Basidiomycota,3VGPR@5234|Tremellales	4751|Fungi	K	Transcription factor	HAP5	GO:0000429,GO:0000436,GO:0000981,GO:0000982,GO:0001077,GO:0001228,GO:0003674,GO:0003676,GO:0003677,GO:0003700,GO:0005488,GO:0005575,GO:0005622,GO:0005623,GO:0005634,GO:0005667,GO:0006139,GO:0006351,GO:0006355,GO:0006357,GO:0006366,GO:0006725,GO:0006807,GO:0007154,GO:0007584,GO:0008150,GO:0008152,GO:0009058,GO:0009059,GO:0009605,GO:0009889,GO:0009891,GO:0009893,GO:0009987,GO:0009991,GO:0010467,GO:…	ko:K08066	ko04612,ko05152,map04612,map05152	CBFD_NFYB_HMF,Histone	OTHER
336865	By MS/MS	By MS/MS	By MS/MS	By MS/MS	By MS/MS	By MS/MS	By MS/MS	By MS/MS	By MS/MS	By MS/MS	By MS/MS	By MS/MS	1292600000	1390700000	1525900000	1139200000	3181900000	2250000000	3049700000	3342400000	1508000000	1917500000	1943100000	2418000000	445690000	535490000	389240000	379160000	532080000	818240000	625540000	577390000	427980000	503170000	459020000	596000000	82508.K1V7Y6	7.27e-177	502	COG1064@1|root,KOG0023@2759|Eukaryota,38EJ7@33154|Opisthokonta,3NVVI@4751|Fungi,3UZ20@5204|Basidiomycota,3VGNQ@5234|Tremellales	4751|Fungi	Q	Alcohol dehydrogenase GroES-like domain	NA	NA	ko:K00002	ko00010,ko00040,ko00561,ko00930,ko01100,ko01110,ko01120,ko01130,ko01220,map00010,map00040,map00561,map00930,map01100,map01110,map01120,map01130,map01220	ADH_N,ADH_zinc_N	OTHER
336868	By MS/MS	By MS/MS	By MS/MS	By matching	By MS/MS	By MS/MS	By MS/MS	By MS/MS	By MS/MS	By matching	By MS/MS	By matching	76334000	83348000	82357000	57274000	86384000	84097000	39830000	65890000	68892000	83903000	96100000	35406000	0	38620000	33348000	0	18607000	33538000	0	0	30867000	0	34186000	0	5217.XP_007006914.1	0	1027	KOG2604@1|root,KOG2604@2759|Eukaryota,38C4E@33154|Opisthokonta,3NV3Q@4751|Fungi,3UZI2@5204|Basidiomycota,3VD4M@5234|Tremellales	4751|Fungi	U	Sec34-like family	COG3	GO:0000301,GO:0003674,GO:0005215,GO:0005575,GO:0005622,GO:0005623,GO:0005737,GO:0005794,GO:0006810,GO:0006886,GO:0006888,GO:0006891,GO:0006914,GO:0006996,GO:0007030,GO:0008104,GO:0008150,GO:0008152,GO:0008565,GO:0009056,GO:0009987,GO:0010256,GO:0012505,GO:0015031,GO:0015833,GO:0016043,GO:0016192,GO:0016236,GO:0017119,GO:0030242,GO:0032258,GO:0032991,GO:0033036,GO:0033365,GO:0034613,GO:0042886,GO:…	ko:K20290	NA	Sec34	OTHER
336949	By matching	By matching	By matching	By matching	By MS/MS	By MS/MS	By MS/MS	By MS/MS	NA	By MS/MS	By MS/MS	By matching	20983000	51403000	57371000	28256000	200940000	134530000	152620000	219520000	0	44167000	81912000	72417000	0	0	0	0	58046000	61059000	62614000	57741000	0	0	0	0	82508.K1V9G7	3.16e-212	598	COG0631@1|root,KOG0698@2759|Eukaryota,38FMC@33154|Opisthokonta,3NUYG@4751|Fungi,3UZZ1@5204|Basidiomycota,3VDEN@5234|Tremellales	4751|Fungi	T	Sigma factor PP2C-like phosphatases	MgPP2CL1	GO:0000001,GO:0000173,GO:0000188,GO:0000394,GO:0000749,GO:0000750,GO:0001932,GO:0001933,GO:0003674,GO:0003824,GO:0004721,GO:0004722,GO:0004724,GO:0005575,GO:0005622,GO:0005623,GO:0005634,GO:0005737,GO:0006139,GO:0006388,GO:0006396,GO:0006399,GO:0006464,GO:0006469,GO:0006470,GO:0006725,GO:0006793,GO:0006796,GO:0006807,GO:0006950,GO:0006970,GO:0006996,GO:0007005,GO:0007154,GO:0007165,GO:0007186,GO:…	ko:K19704	ko04011,map04011	PP2C	OTHER
336955	NA	NA	By matching	NA	By MS/MS	By MS/MS	By matching	By matching	NA	NA	NA	NA	0	0	25289000	0	17741000	18855000	23022000	30941000	0	0	0	0	0	0	0	0	0	0	0	0	0	0	0	0	82508.K1W9S4	2.61e-55	181	COG0216@1|root,KOG2726@2759|Eukaryota,3A8CQ@33154|Opisthokonta,3P5B6@4751|Fungi,3V2R5@5204|Basidiomycota,3VFP1@5234|Tremellales	4751|Fungi	J	RF-1 domain	NA	GO:0000313,GO:0000315,GO:0003674,GO:0003676,GO:0003723,GO:0003747,GO:0003824,GO:0004045,GO:0005488,GO:0005575,GO:0005622,GO:0005623,GO:0005737,GO:0005739,GO:0005740,GO:0005743,GO:0005759,GO:0005761,GO:0005762,GO:0005840,GO:0006412,GO:0006414,GO:0006415,GO:0006417,GO:0006518,GO:0006807,GO:0008079,GO:0008135,GO:0008150,GO:0008152,GO:0009058,GO:0009059,GO:0009889,GO:0009987,GO:0010467,GO:0010468,GO:…	NA	NA	RF-1	OTHER
337081	By MS/MS	By MS/MS	By MS/MS	By MS/MS	By MS/MS	By MS/MS	By MS/MS	By MS/MS	By MS/MS	By MS/MS	By MS/MS	By MS/MS	1144400000	1143600000	1512800000	1082100000	1688200000	1584700000	1518100000	1958100000	1398100000	1066400000	1458900000	1469400000	174640000	173590000	172130000	224900000	183190000	244190000	164350000	199660000	211850000	197120000	175500000	176710000	82508.K1VI91	2.44e-284	791	COG1498@1|root,KOG2573@2759|Eukaryota,38D7R@33154|Opisthokonta,3NWPQ@4751|Fungi,3UZ8S@5204|Basidiomycota,3VCPW@5234|Tremellales	4751|Fungi	AJ	Small nuclear ribonucleoprotein	nop56	GO:0000154,GO:0003674,GO:0003676,GO:0003723,GO:0003729,GO:0005488,GO:0005575,GO:0005622,GO:0005623,GO:0005634,GO:0005730,GO:0005732,GO:0006139,GO:0006364,GO:0006396,GO:0006725,GO:0006807,GO:0008150,GO:0008152,GO:0009451,GO:0009987,GO:0010467,GO:0016070,GO:0016072,GO:0022613,GO:0030515,GO:0030532,GO:0030684,GO:0030686,GO:0031428,GO:0031974,GO:0031981,GO:0032040,GO:0032991,GO:0034470,GO:0034641,GO:…	ko:K14564	ko03008,map03008	NOP5NT,Nop	OTHER
337129	By MS/MS	By MS/MS	By MS/MS	By MS/MS	By MS/MS	By MS/MS	By MS/MS	By MS/MS	By MS/MS	By MS/MS	By MS/MS	By MS/MS	496070000	433520000	644750000	564860000	842340000	506530000	878590000	894040000	584220000	735690000	934460000	656800000	328310000	308180000	394090000	443270000	407600000	271750000	429970000	379790000	364300000	419460000	445900000	361860000	5207.AAW44670	6.41e-106	310	KOG1693@1|root,KOG1693@2759|Eukaryota,38GKP@33154|Opisthokonta,3NV0D@4751|Fungi,3UYYQ@5204|Basidiomycota,3VG2F@5234|Tremellales	4751|Fungi	U	emp24/gp25L/p24 family/GOLD	NA	GO:0005575,GO:0005622,GO:0005623,GO:0005737,GO:0005783,GO:0005798,GO:0006621,GO:0006810,GO:0006886,GO:0006888,GO:0008104,GO:0008150,GO:0009987,GO:0012505,GO:0015031,GO:0015833,GO:0016020,GO:0016021,GO:0016192,GO:0030134,GO:0030135,GO:0031224,GO:0031410,GO:0031982,GO:0032507,GO:0033036,GO:0033365,GO:0034613,GO:0035437,GO:0042886,GO:0043226,GO:0043227,GO:0043229,GO:0043231,GO:0044424,GO:0044425,GO:…	ko:K14825	NA	EMP24_GP25L	SP
337182	By MS/MS	By MS/MS	By MS/MS	By MS/MS	By MS/MS	By MS/MS	By MS/MS	By MS/MS	By MS/MS	By MS/MS	By MS/MS	By MS/MS	494650000	433130000	702820000	557360000	779210000	440120000	724730000	873250000	786810000	744060000	868690000	654360000	184430000	186620000	197180000	249580000	194140000	169760000	199920000	157870000	225510000	203880000	183720000	196510000	82508.K1VHR7	2.77e-197	557	COG0079@1|root,KOG0633@2759|Eukaryota,38DTP@33154|Opisthokonta,3NV21@4751|Fungi,3UXXS@5204|Basidiomycota,3VDUH@5234|Tremellales	4751|Fungi	E	Aminotransferase class I and II	HIS5	GO:0000105,GO:0003674,GO:0003824,GO:0004400,GO:0005575,GO:0005622,GO:0005623,GO:0005737,GO:0006082,GO:0006520,GO:0006547,GO:0006725,GO:0006807,GO:0008150,GO:0008152,GO:0008483,GO:0008652,GO:0009058,GO:0009987,GO:0010035,GO:0010038,GO:0010045,GO:0016053,GO:0016740,GO:0016769,GO:0018130,GO:0019438,GO:0019752,GO:0034641,GO:0042221,GO:0043436,GO:0044237,GO:0044238,GO:0044249,GO:0044281,GO:0044283,GO:…	ko:K00817	ko00340,ko00350,ko00360,ko00400,ko00401,ko00960,ko01100,ko01110,ko01130,ko01230,map00340,map00350,map00360,map00400,map00401,map00960,map01100,map01110,map01130,map01230	Aminotran_1_2	OTHER
337183	NA	NA	By MS/MS	By matching	NA	NA	NA	NA	By MS/MS	By MS/MS	By matching	NA	0	0	3094600	3961700	0	0	0	0	2594900	2970700	3802900	0	0	0	0	0	0	0	0	0	0	0	0	0	5217.XP_007002160.1	3.25e-31	114	COG1841@1|root,2RDGX@2759|Eukaryota,38IP3@33154|Opisthokonta,3PKK6@4751|Fungi,3VABP@5204|Basidiomycota,3VHC1@5234|Tremellales	4751|Fungi	J	Ribosomal protein L30p/L7e	NA	NA	NA	NA	Ribosomal_L30	OTHER
337264	By MS/MS	By MS/MS	By MS/MS	By MS/MS	By MS/MS	By MS/MS	By MS/MS	By MS/MS	By MS/MS	By MS/MS	By MS/MS	By MS/MS	2753900000	2761600000	3781200000	2707700000	6697000000	4849800000	6043900000	6563200000	2386900000	3146700000	3541200000	2463500000	456620000	442930000	506210000	525290000	675990000	626850000	620450000	646390000	438580000	437770000	420540000	414170000	82508.K1VUU5	3.47e-252	701	COG5019@1|root,KOG2655@2759|Eukaryota,38BV0@33154|Opisthokonta,3NUM5@4751|Fungi,3UYKD@5204|Basidiomycota,3VE7K@5234|Tremellales	4751|Fungi	DUZ	Belongs to the TRAFAC class TrmE-Era-EngA-EngB-Septin- like GTPase superfamily. Septin GTPase family	CDC3	GO:0000144,GO:0000166,GO:0000278,GO:0000281,GO:0000399,GO:0000910,GO:0000921,GO:0001400,GO:0001882,GO:0001883,GO:0003674,GO:0005198,GO:0005488,GO:0005525,GO:0005543,GO:0005575,GO:0005618,GO:0005619,GO:0005622,GO:0005623,GO:0005628,GO:0005737,GO:0005826,GO:0005856,GO:0005933,GO:0005935,GO:0005937,GO:0005938,GO:0005940,GO:0006996,GO:0007010,GO:0007049,GO:0007163,GO:0008150,GO:0008289,GO:0009277,GO:…	ko:K16944	NA	Septin	OTHER
337289	By MS/MS	By MS/MS	By MS/MS	By MS/MS	By MS/MS	By MS/MS	By MS/MS	By MS/MS	By MS/MS	By MS/MS	By MS/MS	By MS/MS	12022000000	8813000000	15350000000	14567000000	15510000000	12351000000	15326000000	16546000000	15463000000	13898000000	17633000000	14844000000	5088800000	5090400000	5021400000	5355700000	3412200000	3962900000	3735600000	4266900000	5405000000	5131400000	5591100000	5496700000	82508.K1VNM0	4.5e-129	372	COG2125@1|root,KOG1646@2759|Eukaryota,38HEM@33154|Opisthokonta,3NUD1@4751|Fungi,3UXZH@5204|Basidiomycota,3VDAG@5234|Tremellales	4751|Fungi	J	Belongs to the eukaryotic ribosomal protein eS6 family	RPS6	GO:0000462,GO:0002181,GO:0003674,GO:0003735,GO:0005198,GO:0005575,GO:0005622,GO:0005623,GO:0005737,GO:0005829,GO:0005840,GO:0006139,GO:0006364,GO:0006396,GO:0006412,GO:0006518,GO:0006725,GO:0006807,GO:0008150,GO:0008152,GO:0009058,GO:0009059,GO:0009987,GO:0010467,GO:0015935,GO:0016070,GO:0016072,GO:0019538,GO:0022613,GO:0022626,GO:0022627,GO:0030490,GO:0030684,GO:0030686,GO:0032040,GO:0032991,GO:…	ko:K02991	ko01521,ko03010,ko04066,ko04150,ko04151,ko04371,ko04714,ko04910,ko05205,map01521,map03010,map04066,map04150,map04151,map04371,map04714,map04910,map05205	Ribosomal_S6e	OTHER
337305	By MS/MS	By MS/MS	By MS/MS	By matching	By MS/MS	By MS/MS	By MS/MS	By MS/MS	By MS/MS	By MS/MS	By MS/MS	By MS/MS	22830000	28534000	39557000	1007900	78735000	50678000	67925000	81847000	25680000	33800000	6002100	26702000	9208300	9908300	33929000	0	50119000	22458000	50695000	61117000	28025000	30804000	0	28384000	82508.K1V672	0	1108	28N1R@1|root,2QUKR@2759|Eukaryota,39SBW@33154|Opisthokonta,3NZN2@4751|Fungi,3UZAM@5204|Basidiomycota,3VCZE@5234|Tremellales	4751|Fungi	S	PLD-like domain	NA	NA	NA	NA	PLDc_2	OTHER
337365	By matching	By matching	By MS/MS	By MS/MS	By matching	By MS/MS	By matching	By MS/MS	By matching	By matching	By MS/MS	By matching	91595000	118820000	113460000	117980000	77191000	102440000	96514000	132800000	110180000	107890000	142440000	144010000	0	0	0	65620000	0	70224000	0	67716000	0	0	0	0	552467.XP_003196203.1	1.84e-74	228	COG0652@1|root,KOG0879@2759|Eukaryota,38S5T@33154|Opisthokonta,3P1UU@4751|Fungi,3V0FV@5204|Basidiomycota,3VFAD@5234|Tremellales	4751|Fungi	O	PPIases accelerate the folding of proteins. It catalyzes the cis-trans isomerization of proline imidic peptide bonds in oligopeptides	cyp3	GO:0000375,GO:0000377,GO:0000398,GO:0000413,GO:0003674,GO:0003755,GO:0003824,GO:0005575,GO:0005622,GO:0005623,GO:0005634,GO:0006139,GO:0006396,GO:0006397,GO:0006464,GO:0006725,GO:0006807,GO:0008150,GO:0008152,GO:0008380,GO:0009987,GO:0010467,GO:0016070,GO:0016071,GO:0016853,GO:0016859,GO:0018193,GO:0018208,GO:0019538,GO:0034641,GO:0036211,GO:0043170,GO:0043226,GO:0043227,GO:0043229,GO:0043231,GO:…	ko:K09567	ko03040,map03040	Pro_isomerase	OTHER
337394	By MS/MS	By MS/MS	By MS/MS	By MS/MS	By MS/MS	By MS/MS	By MS/MS	By MS/MS	By MS/MS	By MS/MS	By MS/MS	By MS/MS	13132000000	11798000000	10983000000	10750000000	14769000000	10730000000	14165000000	13564000000	13517000000	15855000000	13482000000	15434000000	5709800000	4753900000	4384800000	5307000000	4051000000	4726400000	3956800000	3943600000	5026300000	4988600000	4129900000	5449300000	36080.S2IVQ3	8.73e-33	115	COG2053@1|root,KOG3502@2759|Eukaryota,3A8FK@33154|Opisthokonta,3P583@4751|Fungi,1GUDY@112252|Fungi incertae sedis	4751|Fungi	J	Ribosomal protein S28e	RPS28A	GO:0000028,GO:0002181,GO:0003674,GO:0003676,GO:0003723,GO:0003735,GO:0005198,GO:0005488,GO:0005575,GO:0005622,GO:0005623,GO:0005737,GO:0005829,GO:0005840,GO:0006139,GO:0006364,GO:0006396,GO:0006403,GO:0006405,GO:0006407,GO:0006412,GO:0006518,GO:0006611,GO:0006725,GO:0006807,GO:0006810,GO:0006886,GO:0006913,GO:0006996,GO:0008104,GO:0008150,GO:0008152,GO:0009058,GO:0009059,GO:0009893,GO:0009894,GO:…	ko:K02979	ko03010,map03010	Ribosomal_S28e	OTHER
337402	By MS/MS	By MS/MS	By MS/MS	By MS/MS	By MS/MS	By MS/MS	By MS/MS	By MS/MS	By MS/MS	By MS/MS	By MS/MS	By MS/MS	3519400000	4349700000	3833200000	4211700000	3799200000	3258100000	3450200000	3813900000	3398900000	3904900000	3870700000	3561400000	2929500000	3267400000	2483400000	3317900000	2057900000	2172400000	1760500000	1772500000	2511100000	2569800000	2348000000	2303900000	5207.AAW43233	7.59e-60	187	KOG3434@1|root,KOG3434@2759|Eukaryota,3A5RD@33154|Opisthokonta,3P2WB@4751|Fungi,3V1WG@5204|Basidiomycota,3VGYM@5234|Tremellales	4751|Fungi	J	Ribosomal L22e protein family	rpl22	GO:0002181,GO:0003674,GO:0003676,GO:0003723,GO:0003735,GO:0005198,GO:0005488,GO:0005575,GO:0005622,GO:0005623,GO:0005737,GO:0005829,GO:0005840,GO:0006412,GO:0006518,GO:0006807,GO:0008150,GO:0008152,GO:0009058,GO:0009059,GO:0009987,GO:0010467,GO:0015934,GO:0019538,GO:0022625,GO:0022626,GO:0032991,GO:0034641,GO:0034645,GO:0043043,GO:0043170,GO:0043226,GO:0043228,GO:0043229,GO:0043232,GO:0043603,GO:…	ko:K02891	ko03010,map03010	Ribosomal_L22e	OTHER
337421	NA	NA	NA	NA	By matching	NA	By MS/MS	By matching	By matching	By matching	NA	By matching	0	0	0	0	12133000	0	25405000	22184000	6852700	14936000	0	9721400	0	0	0	0	0	0	0	0	0	0	0	0	5217.XP_007008250.1	5.27e-159	447	COG1057@1|root,KOG3199@2759|Eukaryota,38BZ1@33154|Opisthokonta,3NU32@4751|Fungi,3UZQQ@5204|Basidiomycota,3VDB9@5234|Tremellales	4751|Fungi	H	Cytidylyltransferase-like	NMA1	GO:0000309,GO:0003674,GO:0003824,GO:0004515,GO:0005575,GO:0005622,GO:0005623,GO:0005634,GO:0005737,GO:0006082,GO:0006139,GO:0006520,GO:0006531,GO:0006725,GO:0006732,GO:0006733,GO:0006753,GO:0006793,GO:0006796,GO:0006807,GO:0008150,GO:0008152,GO:0009058,GO:0009066,GO:0009108,GO:0009117,GO:0009165,GO:0009435,GO:0009987,GO:0016740,GO:0016772,GO:0016779,GO:0018130,GO:0019355,GO:0019359,GO:0019362,GO:…	ko:K06210	ko00760,ko01100,map00760,map01100	CTP_transf_like	OTHER
337466	By MS/MS	By MS/MS	By MS/MS	By MS/MS	By MS/MS	By MS/MS	By MS/MS	By MS/MS	By MS/MS	By MS/MS	By MS/MS	By MS/MS	699150000	787550000	753940000	555610000	3583300000	2433600000	3156200000	3704400000	951030000	974490000	1010300000	575510000	157870000	151480000	144990000	153150000	412460000	358610000	448060000	418980000	170200000	163790000	150270000	142530000	82508.K1VTK3	0	1208	COG0578@1|root,KOG0042@2759|Eukaryota,38FKM@33154|Opisthokonta,3NU42@4751|Fungi,3UZ87@5204|Basidiomycota,3VDV4@5234|Tremellales	4751|Fungi	C	Belongs to the FAD-dependent glycerol-3-phosphate dehydrogenase family	GUT2	GO:0001302,GO:0003674,GO:0003824,GO:0004368,GO:0005575,GO:0005622,GO:0005623,GO:0005737,GO:0005739,GO:0005740,GO:0005741,GO:0005975,GO:0006066,GO:0006071,GO:0006072,GO:0006116,GO:0006139,GO:0006725,GO:0006732,GO:0006733,GO:0006734,GO:0006753,GO:0006793,GO:0006796,GO:0006807,GO:0007568,GO:0007569,GO:0008150,GO:0008152,GO:0009117,GO:0009331,GO:0009987,GO:0016020,GO:0016021,GO:0016491,GO:0016614,GO:…	ko:K00111	ko00564,ko01110,map00564,map01110	DAO,DAO_C,EF-hand_7	OTHER
337512	By matching	By MS/MS	By matching	By matching	By MS/MS	By MS/MS	By MS/MS	By MS/MS	By MS/MS	By MS/MS	By MS/MS	By MS/MS	159940000	132420000	204410000	67668000	396320000	350360000	375890000	732590000	421810000	464100000	288770000	347360000	57457000	53081000	133230000	67462000	185810000	151090000	205140000	305950000	165160000	166700000	178430000	229710000	82508.K1VJR3	1.46e-95	285	KOG3945@1|root,KOG3945@2759|Eukaryota,39IZV@33154|Opisthokonta,3Q3CV@4751|Fungi,3V0DU@5204|Basidiomycota,3VEW2@5234|Tremellales	4751|Fungi	S	Mitochondrial 18 KDa protein (MTP18)	NA	NA	ko:K17981	NA	MTP18	OTHER
337525	By MS/MS	By MS/MS	By matching	By matching	By MS/MS	By MS/MS	By matching	By MS/MS	By matching	By matching	By MS/MS	By MS/MS	564580000	594280000	626530000	638700000	395120000	379590000	377350000	397680000	709890000	824950000	687610000	902930000	0	0	0	0	0	0	0	0	0	0	0	0	82508.K1VD20	5.27e-114	335	KOG1901@1|root,KOG1901@2759|Eukaryota,38CU9@33154|Opisthokonta,3NWV5@4751|Fungi,3UZZN@5204|Basidiomycota,3VEX1@5234|Tremellales	4751|Fungi	S	YT521-B-like domain	NA	GO:0003674,GO:0003676,GO:0003723,GO:0003729,GO:0003730,GO:0005488,GO:0005575,GO:0005622,GO:0005623,GO:0005737,GO:0008150,GO:0009894,GO:0010468,GO:0010608,GO:0019219,GO:0019220,GO:0019222,GO:0031323,GO:0031329,GO:0043487,GO:0043488,GO:0044424,GO:0044464,GO:0050789,GO:0050794,GO:0051171,GO:0051174,GO:0051252,GO:0060255,GO:0061013,GO:0065007,GO:0065008,GO:0080090,GO:0097159,GO:1901363,GO:1903311	ko:K20102	NA	YTH	OTHER
337526	By MS/MS	By MS/MS	By MS/MS	By MS/MS	By MS/MS	By MS/MS	By matching	By MS/MS	By MS/MS	By MS/MS	By MS/MS	By MS/MS	99218000	174210000	152140000	109050000	187750000	125580000	113900000	182990000	265200000	218060000	237660000	121900000	79595000	84081000	75057000	62677000	80394000	89457000	65212000	87653000	96527000	93635000	92530000	80014000	82508.K1WTR5	2.29e-116	350	COG0400@1|root,KOG2112@2759|Eukaryota,38RN5@33154|Opisthokonta,3NZH9@4751|Fungi,3V0W8@5204|Basidiomycota,3VDIP@5234|Tremellales	4751|Fungi	I	Phospholipase/Carboxylesterase	NA	GO:0002084,GO:0003674,GO:0003824,GO:0005575,GO:0005622,GO:0005623,GO:0005634,GO:0005737,GO:0006464,GO:0006807,GO:0008150,GO:0008152,GO:0008474,GO:0009056,GO:0009057,GO:0009987,GO:0016787,GO:0016788,GO:0016790,GO:0019538,GO:0030163,GO:0035601,GO:0036211,GO:0042157,GO:0042159,GO:0043170,GO:0043226,GO:0043227,GO:0043229,GO:0043231,GO:0043412,GO:0044237,GO:0044238,GO:0044260,GO:0044267,GO:0044424,GO:…	ko:K06128,ko:K06130,ko:K06999	ko00564,ko05231,map00564,map05231	Abhydrolase_2	OTHER
337548	By MS/MS	By MS/MS	By MS/MS	By MS/MS	By MS/MS	By MS/MS	By MS/MS	By MS/MS	By MS/MS	By MS/MS	By MS/MS	By MS/MS	1576400000	1402400000	1949300000	1610700000	2383700000	2798000000	2147600000	2674100000	1588800000	1597500000	1623800000	1621400000	1015800000	911570000	1160400000	1222600000	1287100000	1912000000	1263800000	1541900000	1176500000	1102700000	1016100000	1194900000	82508.K1VWG2	7.81e-98	291	COG0563@1|root,KOG3079@2759|Eukaryota,38HJ3@33154|Opisthokonta,3NVA4@4751|Fungi,3UY90@5204|Basidiomycota,3VE3D@5234|Tremellales	4751|Fungi	F	Catalyzes the phosphorylation of pyrimidine nucleoside monophosphates at the expense of ATP. Plays an important role in de novo pyrimidine nucleotide biosynthesis. Has preference for UMP and dUMP as phosphate acceptors, but can also use CMP, dCMP and AMP	URA6	GO:0003674,GO:0003824,GO:0004017,GO:0005575,GO:0005622,GO:0005623,GO:0005634,GO:0005737,GO:0006139,GO:0006206,GO:0006207,GO:0006725,GO:0006753,GO:0006793,GO:0006796,GO:0006807,GO:0008150,GO:0008152,GO:0009041,GO:0009058,GO:0009112,GO:0009117,GO:0009123,GO:0009165,GO:0009987,GO:0016301,GO:0016310,GO:0016740,GO:0016772,GO:0016776,GO:0018130,GO:0019205,GO:0019438,GO:0019637,GO:0019856,GO:0034641,GO:…	ko:K13800	ko00240,ko00983,ko01100,map00240,map00983,map01100	ADK	OTHER
337610	By matching	By matching	By matching	By MS/MS	By matching	By matching	By matching	By matching	By matching	By matching	By matching	By MS/MS	10403000	6987800	26016000	25045000	21957000	22828000	9378100	29502000	26600000	8231800	22455000	8054500	0	0	0	0	0	0	0	0	0	0	0	0	5217.XP_007008036.1	2.45e-56	190	COG3663@1|root,KOG4120@2759|Eukaryota,38C6W@33154|Opisthokonta,3NUH6@4751|Fungi,3V23K@5204|Basidiomycota,3VFY1@5234|Tremellales	4751|Fungi	L	DNA glycosylase	thp1	GO:0000700,GO:0003674,GO:0003824,GO:0004844,GO:0006139,GO:0006259,GO:0006281,GO:0006284,GO:0006285,GO:0006725,GO:0006807,GO:0006950,GO:0006974,GO:0008150,GO:0008152,GO:0008263,GO:0009987,GO:0016787,GO:0016798,GO:0016799,GO:0019104,GO:0033554,GO:0034641,GO:0043170,GO:0044237,GO:0044238,GO:0044260,GO:0046483,GO:0050896,GO:0051716,GO:0071704,GO:0090304,GO:0097506,GO:0097507,GO:0097508,GO:0097509,GO:…	ko:K20813	ko03410,map03410	UDG	OTHER
337645	NA	NA	NA	NA	By MS/MS	By matching	By matching	By matching	NA	NA	NA	NA	0	0	0	0	40313000	23872000	21147000	17747000	0	0	0	0	0	0	0	0	0	0	0	0	0	0	0	0	82508.K1VI55	0	1043	COG5059@1|root,KOG0255@1|root,KOG0244@2759|Eukaryota,KOG0255@2759|Eukaryota,38CGP@33154|Opisthokonta,3NVA2@4751|Fungi,3UXVK@5204|Basidiomycota,3VE4E@5234|Tremellales	4751|Fungi	Z	Belongs to the TRAFAC class myosin-kinesin ATPase superfamily. Kinesin family	NA	NA	ko:K10395	NA	Kinesin	OTHER
337661	By MS/MS	By MS/MS	By MS/MS	By MS/MS	By MS/MS	By MS/MS	By MS/MS	By matching	By MS/MS	By MS/MS	By MS/MS	By MS/MS	256150000	237600000	250490000	218310000	229090000	193410000	213820000	115660000	280100000	275200000	311240000	309530000	141050000	129590000	121170000	127490000	86061000	90117000	0	0	142610000	132250000	130910000	117840000	1366050.N234_05945	4.69e-141	418	COG2079@1|root,COG2079@2|Bacteria,1R5UM@1224|Proteobacteria,2VI2F@28216|Betaproteobacteria,1K248@119060|Burkholderiaceae	28216|Betaproteobacteria	S	MmgE PrpD family protein	NA	NA	NA	NA	MmgE_PrpD	OTHER
337704	By matching	NA	By matching	By MS/MS	By matching	By matching	NA	NA	NA	By MS/MS	NA	NA	12238000	0	64426000	69143000	15072000	7377600	0	0	0	42419000	0	0	0	0	0	0	0	0	0	0	0	0	0	0	5207.AAW45778	9.38e-86	286	COG0413@1|root,COG5459@1|root,KOG2539@2759|Eukaryota,KOG2949@2759|Eukaryota,38DWK@33154|Opisthokonta,3NV9A@4751|Fungi,3V0AM@5204|Basidiomycota,3VGFD@5234|Tremellales	4751|Fungi	H	Catalyzes the reversible reaction in which hydroxymethyl group from 5,10-methylenetetrahydrofolate is transferred onto alpha-ketoisovalerate to form ketopantoate	ECM31	GO:0003674,GO:0003824,GO:0003864,GO:0005575,GO:0005622,GO:0005623,GO:0005737,GO:0005739,GO:0006082,GO:0006575,GO:0006732,GO:0006766,GO:0006767,GO:0006807,GO:0008150,GO:0008152,GO:0009058,GO:0009108,GO:0009110,GO:0009987,GO:0015939,GO:0015940,GO:0016053,GO:0016740,GO:0016741,GO:0016742,GO:0019752,GO:0032787,GO:0034641,GO:0042364,GO:0042398,GO:0043226,GO:0043227,GO:0043229,GO:0043231,GO:0043436,GO:…	ko:K00606	ko00770,ko01100,ko01110,map00770,map01100,map01110	Pantoate_transf	OTHER
337738	By MS/MS	By MS/MS	By MS/MS	By MS/MS	By MS/MS	By MS/MS	By MS/MS	By MS/MS	By MS/MS	By MS/MS	By MS/MS	By MS/MS	478370000	570730000	763830000	585430000	898060000	785600000	812060000	951440000	502370000	549930000	752810000	540460000	100980000	116220000	114280000	114470000	116430000	126340000	113010000	113560000	90038000	93777000	106410000	78964000	5207.AAW46556	1.72e-283	809	KOG0301@1|root,KOG0301@2759|Eukaryota,38BSR@33154|Opisthokonta,3NUQN@4751|Fungi,3UYEE@5204|Basidiomycota,3VCQX@5234|Tremellales	4751|Fungi	I	Phospholipase A-2-activating protein	NA	NA	ko:K14018	ko04141,map04141	PFU,PUL,WD40	OTHER
337748	By MS/MS	By MS/MS	By MS/MS	By MS/MS	By MS/MS	By MS/MS	By MS/MS	By MS/MS	By MS/MS	By MS/MS	By MS/MS	By MS/MS	18622000000	18402000000	20283000000	18021000000	16532000000	12221000000	16787000000	17029000000	18642000000	20883000000	22203000000	21962000000	2037300000	2123600000	1989700000	1980300000	1160500000	1172100000	1235100000	1141500000	1868000000	1990200000	1880800000	2158100000	552467.XP_003192274.1	0	1562	COG0567@1|root,KOG0450@2759|Eukaryota,38FJ2@33154|Opisthokonta,3NV83@4751|Fungi,3UZF4@5204|Basidiomycota,3VD77@5234|Tremellales	4751|Fungi	C	2-oxoglutarate dehydrogenase N-terminus	KGD1	GO:0003674,GO:0003824,GO:0004591,GO:0005575,GO:0005622,GO:0005623,GO:0005737,GO:0005739,GO:0005759,GO:0005947,GO:0006082,GO:0006091,GO:0006099,GO:0006101,GO:0006103,GO:0008150,GO:0008152,GO:0009060,GO:0009295,GO:0009353,GO:0009987,GO:0015980,GO:0016491,GO:0016624,GO:0016903,GO:0016999,GO:0017144,GO:0019752,GO:0030062,GO:0031974,GO:0032991,GO:0042645,GO:0043226,GO:0043227,GO:0043228,GO:0043229,GO:…	ko:K00164	ko00020,ko00310,ko00380,ko01100,ko01110,ko01120,ko01130,ko01200,map00020,map00310,map00380,map01100,map01110,map01120,map01130,map01200	2-oxogl_dehyd_N,E1_dh,OxoGdeHyase_C,Transket_pyr	OTHER
337762	By MS/MS	By MS/MS	By MS/MS	By MS/MS	By MS/MS	By MS/MS	By MS/MS	By MS/MS	By MS/MS	By MS/MS	By MS/MS	By MS/MS	3331800000	3141800000	2888900000	2812800000	2410900000	2810100000	2266600000	3304100000	3857600000	3984700000	4119600000	4261500000	1118900000	1298700000	1102400000	1156000000	834680000	1072300000	764640000	983730000	1320100000	1312400000	1297000000	1308800000	82508.K1V091	1.95e-167	483	COG0183@1|root,KOG1389@2759|Eukaryota,38F89@33154|Opisthokonta,3NX2U@4751|Fungi,3V00E@5204|Basidiomycota,3VHGE@5234|Tremellales	4751|Fungi	I	Thiolase, N-terminal domain	NA	NA	ko:K07513	ko00071,ko00280,ko00592,ko01040,ko01100,ko01110,ko01130,ko01212,ko03320,ko04146,map00071,map00280,map00592,map01040,map01100,map01110,map01130,map01212,map03320,map04146	Thiolase_C,Thiolase_N	OTHER
337812	By MS/MS	By MS/MS	By MS/MS	By MS/MS	By MS/MS	By MS/MS	By MS/MS	By MS/MS	By MS/MS	By MS/MS	By MS/MS	By MS/MS	70452000	111610000	186030000	192970000	333560000	324440000	377770000	362640000	81382000	204380000	217620000	231370000	50516000	37430000	71794000	73283000	119840000	136940000	108540000	115340000	49546000	44930000	50554000	70687000	82508.K1W1H4	1.13e-125	370	COG0667@1|root,KOG1575@2759|Eukaryota,38F9P@33154|Opisthokonta,3NWNE@4751|Fungi,3UZ1P@5204|Basidiomycota,3VD9P@5234|Tremellales	4751|Fungi	C	Aldo/keto reductase family	NA	GO:0003674,GO:0003824,GO:0004033,GO:0005575,GO:0005622,GO:0005623,GO:0005634,GO:0006081,GO:0006725,GO:0006766,GO:0006767,GO:0006807,GO:0008150,GO:0008152,GO:0009058,GO:0009110,GO:0009987,GO:0016491,GO:0016614,GO:0016616,GO:0017144,GO:0018130,GO:0019438,GO:0034641,GO:0042364,GO:0042816,GO:0042817,GO:0042819,GO:0042821,GO:0043226,GO:0043227,GO:0043229,GO:0043231,GO:0044237,GO:0044249,GO:0044271,GO:…	ko:K05275	ko00750,ko01100,ko01120,map00750,map01100,map01120	Aldo_ket_red	OTHER
337827	By matching	By matching	NA	By MS/MS	By matching	By MS/MS	By matching	By MS/MS	By MS/MS	By MS/MS	By MS/MS	NA	1061300	27518000	0	2594000	138200000	269260000	164360000	213630000	4291000	1421600	0	0	0	0	0	1642600	0	0	0	0	2419500	0	0	0	176275.XP_008603263.1	1.12e-66	205	COG5262@1|root,KOG1756@2759|Eukaryota,3A1K0@33154|Opisthokonta,3P2TD@4751|Fungi,3QU61@4890|Ascomycota,219C3@147550|Sordariomycetes,3THYX@5125|Hypocreales	4751|Fungi	B	Histone H2A	HTA1	GO:0000070,GO:0000122,GO:0000228,GO:0000278,GO:0000280,GO:0000775,GO:0000781,GO:0000784,GO:0000785,GO:0000786,GO:0000788,GO:0000790,GO:0000792,GO:0000819,GO:0003674,GO:0003676,GO:0003677,GO:0005488,GO:0005575,GO:0005622,GO:0005623,GO:0005634,GO:0005657,GO:0005694,GO:0005720,GO:0005721,GO:0005724,GO:0006139,GO:0006259,GO:0006281,GO:0006282,GO:0006323,GO:0006325,GO:0006333,GO:0006342,GO:0006355,GO:…	ko:K11251	ko04217,ko05034,ko05322,map04217,map05034,map05322	Histone,Histone_H2A_C	OTHER
337847	By MS/MS	By matching	By MS/MS	By MS/MS	By MS/MS	By MS/MS	By matching	By matching	NA	By matching	By matching	NA	40020000	51198000	15195000	44399000	56415000	75497000	79891000	77806000	0	39164000	41881000	0	0	0	0	0	0	0	0	0	0	0	0	0	5207.AAW40894	1.71e-133	393	KOG2444@1|root,KOG2444@2759|Eukaryota,38J6R@33154|Opisthokonta,3NWYK@4751|Fungi,3V098@5204|Basidiomycota,3VF0Z@5234|Tremellales	4751|Fungi	S	monoubiquitination-related protein	NA	GO:0006139,GO:0006364,GO:0006396,GO:0006725,GO:0006807,GO:0008150,GO:0008152,GO:0009987,GO:0010467,GO:0016070,GO:0016072,GO:0022613,GO:0034470,GO:0034641,GO:0034660,GO:0042254,GO:0042273,GO:0043170,GO:0044085,GO:0044237,GO:0044238,GO:0046483,GO:0071704,GO:0071840,GO:0090304,GO:1901360	NA	NA	WD40	OTHER
337927	NA	By matching	NA	By matching	By MS/MS	By matching	By MS/MS	By MS/MS	NA	NA	NA	By matching	0	6313700	0	15836000	23413000	38922000	31231000	26221000	0	0	0	25950000	0	0	0	0	0	0	0	0	0	0	0	0	552467.XP_003197492.1	1.04e-191	549	COG5144@1|root,KOG3471@2759|Eukaryota,38EI7@33154|Opisthokonta,3NWP8@4751|Fungi,3UZQ5@5204|Basidiomycota,3VDPP@5234|Tremellales	4751|Fungi	K	Component of the core-TFIIH basal transcription factor involved in nucleotide excision repair (NER) of DNA	TFB2	GO:0000109,GO:0000112,GO:0000428,GO:0000439,GO:0000717,GO:0000988,GO:0000990,GO:0000991,GO:0003674,GO:0003676,GO:0003677,GO:0003690,GO:0003700,GO:0005488,GO:0005575,GO:0005622,GO:0005623,GO:0005634,GO:0005654,GO:0005667,GO:0005675,GO:0006139,GO:0006259,GO:0006281,GO:0006289,GO:0006351,GO:0006352,GO:0006355,GO:0006357,GO:0006366,GO:0006367,GO:0006464,GO:0006468,GO:0006725,GO:0006793,GO:0006796,GO:…	ko:K03144	ko03022,ko03420,ko05203,map03022,map03420,map05203	Tfb2	OTHER
[truncated: 3,257 more rows]
[truncated: 8 more columns]

## Sheet: LN_LG_DEqMS
Protein.IDs	LFQ.intensity.Lignin_S1	LFQ.intensity.Lignin_S2	LFQ.intensity.Lignin_S3	LFQ.intensity.Lignin_S4	LFQ.intensity.Glucose_S1	LFQ.intensity.Glucose_S2	LFQ.intensity.Glucose_S3	LFQ.intensity.Glucose_S4	LFQ.intensity.NoCarbon_S1	LFQ.intensity.NoCarbon_S2	LFQ.intensity.NoCarbon_S3	LFQ.intensity.NoCarbon_S4	logFC_Lignin_Glucose	sca.P.Value_Lignin_Glucose	sca.adj.pval_Lignin_Glucose	logFC_Lignin_NoCarbon	sca.P.Value_Lignin_NoCarbon	sca.adj.pval_Lignin_NoCarbon	seed_ortholog_Lignin_Glucose	evalue_Lignin_Glucose	score_Lignin_Glucose	eggNOG_OGs_Lignin_Glucose	max_annot_lvl_Lignin_Glucose	COG_category_Lignin_Glucose	Description_Lignin_Glucose	Preferred_name_Lignin_Glucose	GOs_Lignin_Glucose	KEGG_ko_Lignin_Glucose	KEGG_Pathway_Lignin_Glucose	PFAMs_Lignin_Glucose	SP.Prediction	OTHER	SP.Sec.SPI.	CS.Position	cazy_class	cazy_family	cazy_subfamily	cupp_group	cupp_branch
[truncated: 2,416 more rows]

## Sheet: Lig_Glucose_DEP
Protein.IDs	Intensity.Lignin_S1	Intensity.Lignin_S2	Intensity.Lignin_S3	Intensity.Lignin_S4	Intensity.Glucose_S1	Intensity.Glucose_S2	Intensity.Glucose_S3	Intensity.Glucose_S4	logFC	P.Value	adj.pval	seed_ortholog	evalue	score	eggNOG_OGs	max_annot_lvl	COG_category	Description	Preferred_name	GOs	KEGG_ko	KEGG_Pathway	PFAMs	SP.Prediction	OTHER	SP.Sec.SPI.	CS.Position	cazy_class	cazy_family	cazy_subfamily	cupp_group	cupp_branch
[truncated: 3,483 more rows]
