# Supplementary material for: Exploring the Ligninolytic Capabilities of the Oleaginous Yeast Cutaneotrichosporon oleaginosum
Source: Research Square preprint supplement (doi:10.21203/rs.3.rs-6335743/v1), 2025-05-07
Supplement: Supplementary file 4 [file eef42544a7ffc317eeaf6c50.docx]

**Supporting Information for**

Exploring the Ligninolytic Capabilities of the Oleaginous Yeast *Cutaneotrichosporon oleaginosum*

Austin Gluth1,2, Yunqiao Pu3, Dehong Hu2, Xiaowen Chen4, Zachary Johnson1,2, Xiaolu Li2, Arthur J. Ragauskas3, Wei-Jun Qian2, Tong Zhang2, and Bin Yang1*

(1) Biological Systems Engineering, Washington State University, Richland, WA, USA

(2) Earth & Biological Sciences, Pacific Northwest National Lab, Richland, WA, USA

(3) Biosciences Division, Oak Ridge National Laboratory, Oak Ridge, TN, USA

(4) Biosciences Center, National Renewable Energy Laboratory, Golden, CO, USA

*Corresponding author

**Email:**  [bin.yang@wsu.edu](mailto:bin.yang@wsu.edu)

**This PDF file includes:**

Supporting Text

Supplementary Methods

Figures S1 to S6

Tables S1 to S4

SI References

**Other supporting materials for this manuscript include:**

Datasets S1 to S3

Supporting Text

**SP3 Is A Robust Method for Removing Lignin from Secretomes**

Many fungal oxidoreductases for lignin degradation are secreted (1, 2). Yet, analyzing yeast secretomes is challenging due to the low abundance of secreted proteins (3). Given the carbon-limited experimental conditions studied herein and the low protein yields from concentrated secretomes (*SI Appendix*, Table S2), we decided to employ Single-pot, solid-phase-enhanced sample-preparation (SP3) for secretomics and cellular proteomics sample preparation (Fig. 1). SP3 employs magnetic beads to capture proteins and is effective with low protein inputs (4, 5). Moreover, unlike many proteomics sample processing approaches, SP3 is compatible with detergents which are used to solubilize membrane proteins such as transporters (4, 6, 7). In certain studies, SP3 also outperforms detergent-compatible methods such as FASP (6). Nonetheless, it has rarely been used for secretomics analyses (8, 9), and its efficacy at removing lignin contaminants has not been evaluated. The latter is a particularly important consideration because lignin is concentrated along with proteins during centrifugal molecular weight filtration and must be removed during sample cleanup to prevent LC-MS/MS issues. Another recently developed method called S-Trap is incompatible with concentrated secretomics samples given that the low-pH protein aggregation step causes lignin to precipitate along with the proteins, thereby clogging the filter (data not shown) (10). Using the lignin-containing medium, SP3 removed over 99% of lignin according to UV absorbance at 320 nm after cleanup (*SI Appendix*, Table S3). These results highlight the utility of SP3 for removing pervasive lignin contaminants from secretomes.

Polymeric Lignin May Passively Enter *C. oleaginosum* Cells

According to our previous study, alkali lignin has an average molecular weight of approximately 2,590 Da (11). As an estimate, one of those nanoparticles would contain ~13 ferulic acid molecules if the benzene rings were stacked side-by-side. This is based on an approximate total diameter of ~8 nm based on a single benzen ring diameter of 0.6 nm (C-C bond length of 0.14 nm) and a Van der Waals hydrogen radius of 0.12 nm. Ozbek et al. demonstrate that carboxyl-functionalized, negatively charged polystyrene latex nanoparticles with nominal diameters of 60 nm can enter yeast cells (12). Though the chemical properties differ between functionalized polystyrene and lignin, our results nevertheless raise the possibility of polymeric lignin uptake by fungi.

The mechanisms for lignin fragment uptake are unclear but may again be surmised based on research in *S. cerevisiae*. Using an actin inhibitor to block later stages of endocytosis, polystyrene nanoparticles still enter yeast cells, thereby suggesting a passive uptake mechanism (12). Direct permeation of nanoparticles has been observed in many other studies and may be the mechanism by which lignin fragments could enter *C. oleaginosum* (13)*.* In support of this, the relative abundances of endocytotic proteins and related enzymes either do not change significantly or are downregulated: CHC1 clathrin (Co_412994, FC -0.22), ARP2/3 actin nucleation center (Co_375130, FC -0.43; Co_374590, FC -0.04), and TUB1 tubulin (Co_355945, FC -0.15) (*SI Appendix*, Dataset S2). Near neutral pH, the surface of the yeast cell is negatively charged due to carboxyl groups and phosphorylated mannosyl side chains in the cell wall (14). The charge of alkali lignin may also be negative as a result of deacetylation during dilute alkaline pretreatment and the presence of hydroxyl and carboxyl groups (15). However, the charge state of alkali lignin from pretreated corn stover has not been been evaluated, and it’s possible that the slightly acidic culture conditions protonated lignin to promote adhesion to the yeast cells (*SI Appendix*, Fig. S6A).

**Upper Pathways for Catabolism of H-lignin Derivatives**

Growth of *C. oleaginosum* on *p*-coumaraldehyde, coniferyl aldehyde, cinnamaldehyde, and their respective alcohols has not been directly evaluated; however, other *Trichosporonaceae* yeast and distant relatives metabolize these aromatics (16–20). Putative upper pathways for cinnamaldehyde are not shown in Fig. 6 but may involve promiscuous activities of aldehyde dehydrogenase and/or cinnamoyl-CoA reductase to generate cinnamate, *p*-hydroxybenzoate, and benzoate (17, 21). Cinnamate could be aminated to phenylalanine through the reversible activity of phenylalanine ammonia-lyase, which was upregulated in our results (Co_156110; DEP FC 5.91) (22). Cinnamate may also be hydroxylated by cytochrome P450 monooxygenases to form *p*-coumarate, which has been observed in the oleaginous ascomycete yeast *Yarrowia lipolytica* (23). A BLASTp search of a functionally characterized enzyme returned a low-scoring protein (Co_ 368902) that was not differentially expressed in our results (23). As with cinnamate, benzoate may be hydroxylated to form *p*-hydroxybenzoate via the action of a cytochrome P450 benzoate 4-monooxygenase (Co_ 375039; FC 0.96). Given the promiscuity of aldehyde dehydrogenases, it’s possible that these enzymes also convert *p*-coumaraldehyde to *p*-coumarate; though, we could not find any direct evidence of this in yeast.

**Challenges Projecting Catabolic Pathways for S-lignin Derivatives**

Characterizing enzymes in the upper pathways for S-lignin aromatics catabolism is a burgeoning area of fungal research (24, 25). Though *C. oleaginosum* can consume S-lignin aromatics such as syringaldehyde and syringate, no *O*-demethylase homologs were found using the LigM enzyme from the bacterium *Sphingomonas paucimobilis* (26, 27). Cytochrome P450 monooxygenases catalyze diverse oxidative reactions including demethylation of aromatics and are likely involved (28, 29). Several cytochrome P450 enzymes were upregulated in our proteomics results (Fig. 6); however, their substrate specificities and functions are unclear. In bacterial pathways, 3-*O*-methylgallate is demethylated to form gallate, which is then decarboxylated to pyrogallol (30). A gallate decarboxylase from the yeast *Arxula adeninivorans* has been characterized, but no homologous enzymes were found in *C. oleaginosum* (31)*.*

**Lignin Cultivation Upregulates Putative Phenol and G-lignin Catabolic Pathways**

*C. oleaginosum* utilizes G-lignin model aromatics ferulate and vanillin, as well as benzoate and phenol (27, 32, 33). Though coniferyl alcohol and coniferyl aldehyde are not considered primary G-lignin degradation products, removal of coniferyl aldehyde end groups from lignin has been observed, and they are utilized by microorganisms (34, 35). The aldehyde dehydrogenase ALD5 reportedly converts coniferyl aldehyde to ferulate in *S. cerevisiae* (19). Several homologs of ALD5 were upregulated in *C. oleaginosum* cultivated on lignin: Co_374226 (FC 1.32), Co_ 368412 (FC 1.16), Co_416950 (FC 1.04), and Co_ 390461 (FC 0.42). Like *p*-hydroxybenzoate, vanillate is an important intermediate in the upper pathways for catabolism of hydroxycinnamates. Accumulation of vanillate has been observed during cultivation of *C. oleaginosum* on a phenolic waste stream derived from steam-exploded poplar and may be derived from ferulate catabolism (27, 36, 37). *Aspergillus niger* uses a CoA-dependent β-oxidative route to degrade ferulate and *p*-coumarate (38). As with *p*-coumarate, ferulate is converted to feruloyl-SCoA by a feruloyl-CoA synthetase (i.e., hydroxycinnamate-CoA synthase; hcsA). The product then undergoes a two step process of hydration and dehydrogenation facilitated by a multifunctional β-oxidation hydratase/dehydrogenase (foxA) to yield 4-hydroxy-3-methoxyphenyl-β-ketopropionic acid-SCoA (HMPOP-CoA). Afterwards, Vanillyl-CoA is generated via the action of 3-ketoacyl-CoA thiolase (katA). Finally, thioesterases remove CoA to produce vanillate. BLASTp search results for these promiscuous hydroxycinnamate-catabolizing enzymes are discussed in the main text.

Prior to ring cleavage, phenol and vanillate are converted to catechol and methoxyhydroquinone (and/or hydroxyquinol), respectively (Fig. 6). Phenol hydroxylase converts phenol to catechol but also has activity against catechol (to form pyrogallol) and resorcinol (to form hydroxyquinol). This enzyme has been characterized in the close relative *Cutaneotrichosporon cutaneum* (39, 40). Three homologs were upregulated in our results: Co_391320 (FC 1.37), Co_374925 (FC 1.64), and Co_222522 (FC 2.31). Aromatics decarboxylases have been reported for the yeast *C. parapsilosis* as well as white-rot fungi (25, 41). The homologs Co_419806 and Co_417242 appear to be involved in *p*-hydroxybenzoate and protocatechuate catabolism but may also be involved in vanillate catabolism given the lack of homologs for fungal *O*-demethylases. Vanillate is likely decarboxylated to methoxyhydroquinone then cleaved to form 4-hydroxy-6-methoxy-6-oxohexa-2,4-dienoate (HMOD) (25, 42–45). Another possible route for vanillate metabolism is reductive conversion to vanillin and then the less toxic vanillyl alcohol (45). Homologs of a bacterial vanillin dehydrogenase were upregulated in our results: Co_367813 (FC 1.05) and Co_374424 (FC 0.89) (46). Additionally, a vanillyl-alcohol oxidase (Co_364432) of the AA4 CAZy family was observed in all replicates of the lignin condition (but only one glucose replicate).

As aforementioned, Co_374756 is a catechol 1,2-dioxygenase according to Yaguchi et al. and was upregualted in our results (FC 1.83) (47). Catechol can be *ortho*-cleaved resulting in the valuable compound *cis*,*cis*-muconate. Muconate cycloisomerase converts *cis*,*cis*-muconate to muconolactone and was characterized in *C. cutaneum* (48). A homolog Co_414883 was upregulated 2.36-fold in our results. Another enzyme Co_290106 containing a N-terminal mandelate racemase/muconate lactonizing enzyme domain (PF02746) was also upregulated (log2FC 1.44) and may be involved in galactose and/or aromatics metabolism. Muconolactone is converted to β-ketoadipate enol-lactone by muconolactone isomerase. Homology searches for enzymes characterized in *Aspergilli* returned low-scoring hits: Co_369033 (FC 0.98) and Co_418017, which was interestingly only observed in replicates of the lignin condition. β-ketoadipate enol-lactone is converted to β-ketoadipate by β-ketoadipate enol-lactone hydrolase, which has not been extensively studied in basidiomycetes. Again, BLASTp searches using characterized *Aspergilli* enzymes returned two low-scoring alignments; thus, *Trichosporon asahii* protein sequences inferred from homology were also searched (42, 49–52). β-ketoadipate is activated by a β-ketoadipate-CoA transferase with putative candidates being Co_ 399397 (FC 1.38), Co_373707 (FC 0.99), Co_303768 (FC 0.67), and Co_367394 (FC 0.65). Finally, β-ketoadipyl-CoA is converted to succinate and acetyl-CoA by β-ketoadipyl-CoA thiolase, for which many putative candidates were upregulated (Fig. 6). *C. oleaginosum* also exhibits extradiol *meta*-cleavage of catechol, which yields 2-hydroxymuconic semialdehyde (47). This product is converted to 2-hydroxymuconic acid by 2-hydroxymuconic semialdehyde dehydrogenase, which has been characterized in bacteria such as *Pseudomonas putida* (53)*.* Homologous enzymes were upregulated in *C. oleaginosum* and include Co_416950 (FC 1.04) and Co_374424 (FC 0.89) (54, 55). Additional enzymes in the *meta*-cleavage pathway are not covered here because of uncertainty regarding the prevalence of this catabolic route in yeast and fungi.

Vanillate is decarboxylated to methoxyhydroquinone, which undergoes *ortho*-cleavage in *P. chrysosporium* according to Kato et al. (56). These characterized methoxyhydroquinone 1,2-dioxygenases were used to search for homologs in *C. oleaginosum* (56). This resulted in high-scoring alignments for Co_350065 and Co_390726 (E-values < 1E-35). These two enzymes were observed; however, only Co_390726 was upregulated (DEP FC 4.76; observed in all lignin replicates but only one glucose replicate). Cleavage of methoxyhydroquinone yields HMOD that likely spontaneously converts to 6-methoxy-4,6-dioxohexa-2-enoate through tautomerization and then 4-oxo-monomethyl adipate by a reductase (42). Finally, a demethylase and/or esterase transforms 4-oxo-monomethyl adipate into β-ketoadipate. A candidate (omeA) in *A. niger* was characterized via deletion, but no homologs were found in *C. oleaginosum* (42).

Supplementary Methods

**Lignin Extraction from Dilute Alkali-pretreated Corn Stover**

Corn stover was pretreated at the National Renewable Energy Laboratory (NREL) using 0.1 M sodium hydroxide at 80 °C for 2 h (57, 58). The resulting black liquor was recovered by draining the slurry through screens (∼2 mm wire spacing), and the lignin fraction was precipitated from the liquor by slowly adjusting the pH to 3 using a solution of 10 wt% sulfuric acid (11). The lignin slurry was stored at 4 °C for 16 hours to facilitate precipitation, after which the material was centrifuged at 2,000 rpm for 20 min. The supernatant was carefully decanted, and the solids were washed three times with 5x volume of 70 °C ultrapure water followed by centrifugation. With mixing, the pelleted material was solubilized by slowly increasing the pH to 12.5 using 0.1 M sodium hydroxide. The material was centrifuged again, and the lignin-containing supernatant was collected. The lignin was then precipitated by decreasing the pH to 3 and overnight storage at 4 °C. This process was repeated twice more. The final extract was frozen at -20 °C then lyophilized (Labconco) for four days. The composition of the extract (*SI Appendix*, Table S1) was analyzed according to the K-lignin NREL Laboratory Analytical Procedure (59).

**Yeast Strain, Medium Preparation, and Cultivation Conditions**

*Cutaneotrichosporon oleaginosum* ATCC 20509 (formerly classified as *Cryptococcus curvatus*) was used in this study. Yeast from glycerol (15% v/v) stocks stored at −80 °C were streaked onto Yeast extract-Peptone-Dextrose (YPD) plates a week prior to experimentation. YPD was used for short term storage of plates at 4 °C and seed culture preparation. The experimental medium was comprised of 5 g/L ammonium sulfate, 1.7 g/L YNB (Difco) without amino acids, and 0.79 g/L CSM amino acids (MP Biomedicals). CSM was added to provide ready-to-use amino acids for protein production in the carbon-limited cultures. The pH of the medium was adjusted to 6.5 by slowly adding 3 M sodium hydroxide while stirring, then the medium was filter sterilized through 0.22μm PES bottletop filters (CELLTREAT). Sterile stocks of carbon sources (lignin, glucose, or benzoate) were added to attain 1 g/L. Lignin was prepared and added as follows: first, aluminum foil cutouts were sprayed with 70% isopropanol and exposed to UV light for 1 hour in a biosafety hood. Then, 0.1 g of lignin extracts was spread onto the pre-sterilized cutouts, which were and exposed to UV light for 2 hours. Finally in the biosafety hood, the packets were added to the already aliquoted medium 16 hours prior to cultivation to dissolve/resuspend the particulates.

Seed cultures were grown in 100 mL YPD in 500 mL flat bottom flasks for 22 hours to reach mid-exponential phase (OD600 of ~5). Cells in the seed cultures were collected and centrifuged at 8,000 rpm for 5 min. Cells pellets were washed twice with sterile 50 mM potassium phosphate buffer (pH 6.5) and finally resuspended in experimental medium (without carbon source). 500 mL flasks containing 100 mL experimental media were inoculated to a starting OD600 of 0.4. Cultures were incubated at 28 °C shaking at 180 rpm. Biological replicates were included for all analyses. Uninoculated flasks containing lignin medium (and medium without lignin) were included for contamination controls and assay blanks in triplicate. Contamination checks were conducted using microscopy as well as plating uninoculated lignin-containing medium onto YPD and LB plates. For the first experiment, lignin-containing cultures were sampled at 0, 48, 96, and 144 hours for cell dry weight analysis and preliminary assays for relative quantification of total aromatics. A subsequent experiment was conducted to compare lignin to the other conditions (at 96 hours), to collect material for detailed analyses, and to estimate viable cell counts.

**Cell Dry Weights and Fatty Acid Profile Analyses**

Cultures were harvested in tared tubes by centrifugation at 8,000 rpm for 5 min., and the supernatants were collected for other analyses. Cell pellets were washed twice with ultrapure water, frozen, and lyophilized to measure cell dry weights. The lyophilized cell pellets were crushed to a fine consistency in a mortar and pestle. Direct lipid methylation in alkaline conditions and extraction of the resulting fatty acid methyl esters (FAMEs) was performed according to O'Fallon et al. with some modifications (60). C13:0 FAME (Supelco) was added as an internal standard at a final concentration of 0.2 g/L in the hexane layer. Briefly, 30 mg of cells were added to a master mix containing methanol, potassium hydroxide, and internal standard in solvent compatible tubes. The mixture was incubated at 55 °C for 2 hours with intermittent vortexing. Thereafter, sample tubes were cooled in cold tap water and then sulfuric acid was added to neutralize the potassium hydroxide. The tubes were again incubated at 55 °C for 2 hours with intermittent vortexing then cooled. Hexane was added and each tube was vortexed for 2 min. The tubes were centrifuged at 1,000 rpm for 5 min, and 1 mL of the top hexane layer was removed. The distribution of FAMEs was determined using an Agilent 7890 gas chromatograph coupled to an Agilent 5975 mass spectrometer (GC-MS) as previously reported (61). FAMEs titers were quantified using calibration curves generated from dilutions of the 37 Component FAME Mix (Supelco).

**Relative Quantification of Total Aromatics using UV Absorbance and Prussian Blue Assays**

Supernatant derived from lignin cultures was compared to the uninoculated lignin medium. The medium without lignin was used to blank the spectrophotometer. For relative quantification of soluble lignin, samples from biological triplicates were vortexed and transferred to microcentrifuge tubes. All biological replicates were processed in technical duplicates. These were diluted 50-fold, mixed by pipetting, and transferred to quartz cuvettes. The UV absorbance at 320 nm was measured using the Genesys 150 spectrophotometer (ThermoFisher Scientific) (59). The Prussian Blue assay was also performed to corroborate the UV absorbance results and was conducted as described previously but with modifications to scale the method to 96-well plate format (62). A portion of the aforementioned samples (biological triplicates processed in technical duplicates) were serially diluted to a final dilution of 1:125 in a 96-well microtiter plate. Then, 100 µL was combined with 50 µL of 8 mM K3Fe(CN)6 followed by the immediate addition of 50 µL of freshly prepared 0.1 M FeCl3 (in 0.1 M HCl) using a multichannel pipette for transfer and mixing. Technical duplicates averaged across the biological replicates. Plates were incubated at room temperature for 10 min, and the absorbance 700 nm was recorded using a BioTek PowerWave plate reader. The absorbance values from technical duplicates were averaged across biological triplicates, which were used to calculate % decrease in total aromatics compared to the average of the lignin medium controls as follows:

**Viable Cell Count Estimates**

Culture flasks were sampled and diluted 50-fold. 100 µL of this dilution was combined with 100 µL of 0.1% Trypan Blue diluted from a 0.4% stock (Corning). 15 µL of the sample was loaded onto a hemocytometer, and the DMI6000B inverted microscope (Leica) was used to perform viable cell counts. Additional images were captured in the LAS X application, and counts were checked using ImageJ (63).

**2D-HSQC-NMR Analysis for Semi-quantitive Analysis of Lignin Structural Changes**

The NMR experiments were performed using a Bruker Avance III HD 500 MHz spectrometer operating at a frequency of 125.12 MHz for the 13C nucleus (64, 65). Lyophilized samples were dissolved in a deuterated bi-solvent system consisting of dimethyl sulfoxide (DMSO) and pyridine (v/v 4:1). A standard Bruker pulse sequence (hsqcetgpsisp.2) with adiabatic pulses was used on a Prodigy platform cryoprobe to minimize the sensitivity to constant variations of one bond C–H coupling and produce uniform excitation across the spectral range. Spetra acquisition conditions were as following: 230 ppm spectral width in F1 (13C) dimension with 256 data points, 12 ppm spectral width in F2 (1H) dimension with 2048 data points, a 90° pulse, a 1JC–H of 145 Hz, a 1.0 s pulse delay, and 256 scans. The spectra were zero-filled to a final data size of 2k × 1k and processed using typical matched Gaussian apodization in F2 and cosine-bell apodization in F1. Manual phase correction was employed. The central DMSO solvent peak was used for chemical shifts calibration (δC 39.5 ppm, δH 2.50 ppm).

A semi-quantitative analysis of the HSQC correlation peaks was performed using volume integration. The correlation peaks of C2/H2 from guaiacyl unit and C2/H2 as well as C6/H6 from S and H units in the aromatic rings were used to calculate the H/G/S ratio, with guaiacyl integrals being doubled since guaiacyl unit contains one single correlation while H and S units contain two in their symmetrical structure. The relative abundance of *p*-coumarate and ferulate was estimated based on the total H/G/S aromatic basis. For various interunit linkages, the well-resolved Cα/Hα contours were used for volume integration, and their relative levels were calculated with respect to the aromatic totals.

**Fluorescence Microscopy to Investigate Transport of Low Molecular Weight Lignin**

Live yeast cultures were imaged by an inverted fluorescence confocal microscope (Zeiss LSM 710). 10 μL of cell culture was dropped on a glass coverslip without any sample processing and immediately imaged on a confocal microscope with a 63X NA 1.4 oil immersion objective. The fluorescence from lignin was excited by a 488 nm wavelength laser. The data acquisition parameters, such as laser power, scan rate, fluorescence filter set, PMT detector gain were the same across all sample measurements within each experimental batch in order to compare the relative fluorescence intensities. The first batch compared lignin and benzoate conditions, whereas the second batch compared lignin, glucose, and “No Carbon”. Besides standard confocal fluorescence microscopy, super resolution Airyscan imaging was performed to study subcellular morphologies of yeast cells labeled with MitoTracker Red CMXRos Dye (ThermoFisher Scientific). To automate cell fluorescence intensity analyses, the cell segmentation software Cellpose was employed (66). At least 40 cells were observed and delineated per image. Intensity values for cells in contact with micrometer-sized lignin clusters were excluded. For statistical tests, fluorescence intensities were averaged for each image then two-sided t-tests between the lignin condition and the time-matched controls were conducted assuming equal variance. The Holm’s method was used to adjust p-values given multiple pairwise comparisons.

**SP3 Bead Information and Pre-washing**

The following magnetic beads were used for single-pot, solid-phase-enhanced sample preparation (SP3): Sera-Mag SpeedBead Carboxylate-Modified E3 (GE Healthcare, 65152105050250, 50 μg/μL, hydrophobic) and E7 (GE Healthcare, 45152105050250, 50 μg/μL, hydrophilic) (4, 67). The beads were pre-washed following recommendations from Cytiva. Beads were removed from storage at 4 °C and equilibrated to room temperature for 30 min. Beads were resuspended by gently mixing, and a 1:1 mixture of hydrophobic and hydrophilic beads was prepared in a 1.5 mL microcentrifuge tube. This tube was placed on an Invitrogen DynaMag-2 magnetic stand for 2 min for bead separation, and the storage buffer was removed. The beads were washed by adding 1 mL of 50 mM HEPES (pH 9.1) containing 200 mM NaCl. The beads were incubated at room temperature and 850 rpm shaking for 2 min, then they were placed on the magnetic stand for 2 min to collect the beads and remove the wash buffer. This procedure was repeated twice more followed by additional washes using 1 M NaCl. Finally, beads were washed five times with ultrapure water and resuspended in water at a final concentration of 50 μg/μL. Pre-washed beads were stored at 4 °C no longer than 3 days.

**Secretomics Sample Processing for Analysis of Extracellular Proteins**

Secretomics samples were processed by concentrating culture supernatants and performing subsequent cleanup and digestion steps. After 96 hours of cultivation, the contents of culture flasks were harvested by centrifugation at 8,000 rpm for 5 min. 20 mL of supernatant was transferred to a new 50 mL conical tube and urea was added to a final concentration of 8 M. These tubes were incubated at 37 °C for 1 hour with intermittent vortexing solubilize the urea (68). The samples were split into two sets and concentrated using Amicon 30 kDa MWCO filter concentrators, which were centrifuged at 5,000 x g and room temperature for 30 min. The concentrates from the two sets were combined (~500 μL) and processed with 0.5 mL Amicon 30 kDa MWCO filter concentrators at 12,000 x g for 5 minutes. ~100 μL of concentrate was removed and an additional 100 μL of 250 mM HEPES (pH 7.7) was added to collect residue from the concentrator and to buffer the final slightly alkaline pH of the concentrates for SP3. 10 μL of each sample was removed for BCA analysis of protein concentration. The remaining ~200 μL of concentrate was flash frozen in liquid nitrogen.

SP3 was performed with a bead concentration of 2 mg/mL in ~200 μL concentrated culture supernatant (400 μg total beads). For better peptide recovery, we even recommend increasing the bead concentration to 5-10 mg/mL (4). 8 μL of the pre-washed beads was transferred to the thawed concentrates, and samples were shaken at 850 rpm for 5 min at room temperature. Next, 200 μL of absolute molecular grade ethanol was added, and samples were incubated for 5 min at room temperature with 850 rpm shaking. Afterwards, samples were placed on the magnetic rack for 2 min. The supernatant was removed and the beads were washed twice using 200 μL of 80% ethanol (2 min at room temperature with shaking at 850 rpm). Beads were resuspended by flicking and swirling the tubes. After the final wash, residual ethanol was carefully removed, and the beads were pelleted via brief tabletop centrifugation. On-bead digestion was performed by incubating the samples in 50 μL of digest mix (proteases dissolved in in 50 mM HEPES, pH 7.7) at 37 °C with 850 rpm shaking for 12 hours. Trypsin (Promega) plus Lys-C (Wako Chemicals) were both included at final concentrations of 0.03 μg/μL (or 3.75 mAU/ μL). After digestion, samples were placed on magnetic rack for 2 min and the eluate was transferred to a new tube. A second elution was performed by adding 50 μL of 250 mM HEPES (pH 7.7) with 5% acetonitrile and shaking the samples at 850 rpm for 2 min. The two elutions were finally combined, and Zip-Tip C18 SPE (Omix) was conducted (twice for each sample) for additional cleanup and desalting. The eluates were dried in a SpeedVac vacuum concentrator and resuspended in 12 μL of ultrapure water containing 0.01% DDM and 10 mM DTT. 5 μL of each sample was removed for the fluorometric peptide assay (Pierce), and ~200 ng peptide was loaded for LC-MS/MS analysis.

**Cellular Proteomics Sample Processing for Analysis of Intracellular Proteins**

The same cultures sampled for secretomics analysis were used for cellular proteomics. After centrifugation, cell pellets were washed twice with 50 mM potassium phosphate buffer (pH 6.5). The OD600 of the cell pellet resuspension was measured, and ~5 total OD600 units were transferred to 5 mL conical tubes. These were centrifuged at 8,000 rpm for 5 min, and then flash frozen. Cell pellets were thawed on ice, then 500 μL of lysis solution containing 250 mM HEPES (pH 7.0), 5% SDS, and 1% Triton X-100 was added. The pellets were resuspended by pipetting and transferred to 2 mL bead beater tubes containing 0.5 mm diameter glass beads (Omni International). Cells were homogenized on a Bead Ruptor Elite (Omni International) using the following cycles: 4x 30 second beating cycles (6.0 m/s speed) followed by 2 min on ice after each cycle. After bead beating, 0.45 mm x 10 mm needles (BD) were used to poke holes in the bottom of the tubes, which were then transferred to 2 mL vials (Corning). These were centrifuged at 2,500 x g for 3 min at room temperature. An additional 100 μL of the lysis solution was used to wash residual lysate off the beads via centrifugation. The protein-rich supernatants were transferred to 1.5 mL tubes, and protein concentrations were measured by the BCA assay.

Sample volume was adjusted to 200 μL containing 200 μg protein inputs. 40 μL of the bead mixture detailed above was added. Samples were incubated for 5 min at room temperature, 1,000 rpm. 400 μL of absolute molecular grade ethanol was added, and samples were again incubated for 5 min at room temperature, 1,000 rpm. Samples were then placed on the magnetic rack for 2 min, and the supernatant was removed. Beads were washed twice using 500 μL of 80% ethanol following by 2 min incubation at room temperature with 1,000 rpm shaking. After the final wash, residual ethanol was carefully removed, and the beads were pelleted via brief tabletop centrifugation. On-bead digestion was performed in 100 μL of digest mix (proteases dissolved in in 50 mM HEPES, pH 7.7) at 37 °C and 850 rpm shaking for 16 hours. Trypsin (Promega) and Lys-C (Wako Chemicals) both at 1:100 protease:protein ratios were used. After digestion, samples were placed on magnetic rack for 2 min and the eluate was transferred to a new tube. A second elution was performed by adding 100 μL of 250 mM HEPES (pH 7.7) with 5% acetonitrile and shaking the samples at 850 rpm for 2 min. The two elutions were combined and placed on the magnetic rack for another 2 min to remove residual beads. Finally, the liquid was transferred to a new tube. Desalting was performed using C18 SPE (Sep-Pak, 50 mg columns) and the cleaned peptides were dried in a SpeedVac vacuum concentrator. Samples were resuspended in ultrapure water containing 0.01% DDM and quantified using the fluorometric peptide assay (Pierce). Thereafter, samples volumes and concentrations (0.1 μg/μL) in Waters vials, and DTT was added to a final concentration of 10 mM. 500 ng peptide was injected for LC-MS/MS analysis.

**LC-MS/MS Analysis**

Peptides were analyzed on a Q Exactive Plus mass spectrometer (Thermo Scientific) with a nano-electrospray ion source. Peptides were separated on a self-packed reverse-phase column (25 cm × 75 μm ID packed with Waters 1.7 μm BEH C18 material) with an integrated PicoTip emitter (New Objective). A binary mobile phase comprised of water with 0.1% formic acid and acetonitrile with 0.1% formic acid was used for 2 hour online LC gradients. Data-dependent acquisition was used with the following settings: full MS scans (m/z 300-1800) were collected at a resolution of 70,000 with maximum ion injection time of 20 ms and automatic gain control of 3E6. Fragment ion spectra were collected for up to 12 of the most abundant precursor ions. Precursor ions were first selected (isolation window of 1.5 m/z) and fragmented by higher collisional energy-induced dissociation at 30% normalized collisional energy. MS/MS scans were acquired at a resolution of 17,500 with maximum ion injection time of 50 ms and automatic gain control of 1E5. Fixed first mass was set to 110 m/z and dynamic exclusion was 30 s.

**Proteomics Data Processing and Analysis**

LC-MS/MS data were searched against the JGI protein-encoding FASTA file for *Cutaneotrichosporon oleaginosum* (ATCC 20509 v1.0) using MaxQuant with match between runs (69) for peptide identification and label-free quantification (LFQ) (70). A parent ion mass tolerance of 20 ppm and partial tryptic rule with up to 2 missed cleavages were the key searching parameters. Oxidation on methionine (+15.9949) and N-terminal acetylation (+42.0106) were selected as dynamic modifications. False discovery rates were limited to 1% for both peptides and proteins. For proteomics datasets, there is a dependency between the number of peptide sequence matches (PSMs) and protein expression/abundance variance. Given the low concentration of secreted proteins and a desire to include proteins identified with one peptide, we used DEqMS for accurate differential expression analysis with MaxQuant LFQ intensities (71). A minimum of two LFQ intensities in each condition was required for differential expression analysis using DEqMS. To maximize the value acquired from these datasets, we also performed differential expression analysis using normalized raw intensity values via the DEP package (72). Prior to analysis, normalized data were filtered for 1/2 completeness over all samples: this means that for some proteins analyzed using the limma algorithm, only one observation may be present in one of the conditions, and, thus, the variance was estimated from the samples in the other condition groups (73). Missing values were allowed for PCA (via the non-linear iterative partial least squares algorithm) and Pearson correlation analysis. eggNOG orthologous functional annotations were merged with the MaxQuant results using JGI protein accession IDs (74). Signal peptide predictions were conducted using SignalP 6.0 with the “Eukarya” setting to search only for standard “Sec/SPI SPs” with the “Fast” model mode (75). Carbohydrate-active enzyme (CAZy) annotations were merged from those found in the CUPP database (76) for *C. oleaginosum*. MaxQuant data, differential expression analysis results, and annotations are summarized in *SI Appendix*, Datasets S1–2. BLASTp was completed through the JGI mycocosm portal (77, 78); those results and the corresponding publication DOI’s are included in *SI Appendix*, Dataset S3. Protein localization prediction for “Fungi” was conducted for select IDs using MULocDeep (79). For certain proteins, these predictions were compared to those provided by DeepLoc 2.0 with the “High-quality” setting (80) as well as “The PTS1 predictor” online tool with the “FUNGI-specific function” provided by the IMP Bioinformatics Group (81). InterPro and NCBI’s Conserved Domain search were used for curating protein domain and family annotations (82, 83). KEGG (84) pathway over-representation analyses and visualizations were performed using the “clusterProfiler” package (85). All other data-containing figures were made with the “ggplot2” package (86). Portions of Fig. 1, Fig. 6, and *SI Appendix*, Fig. S4 were created with BioRender.com.

**Supplementary Figures**


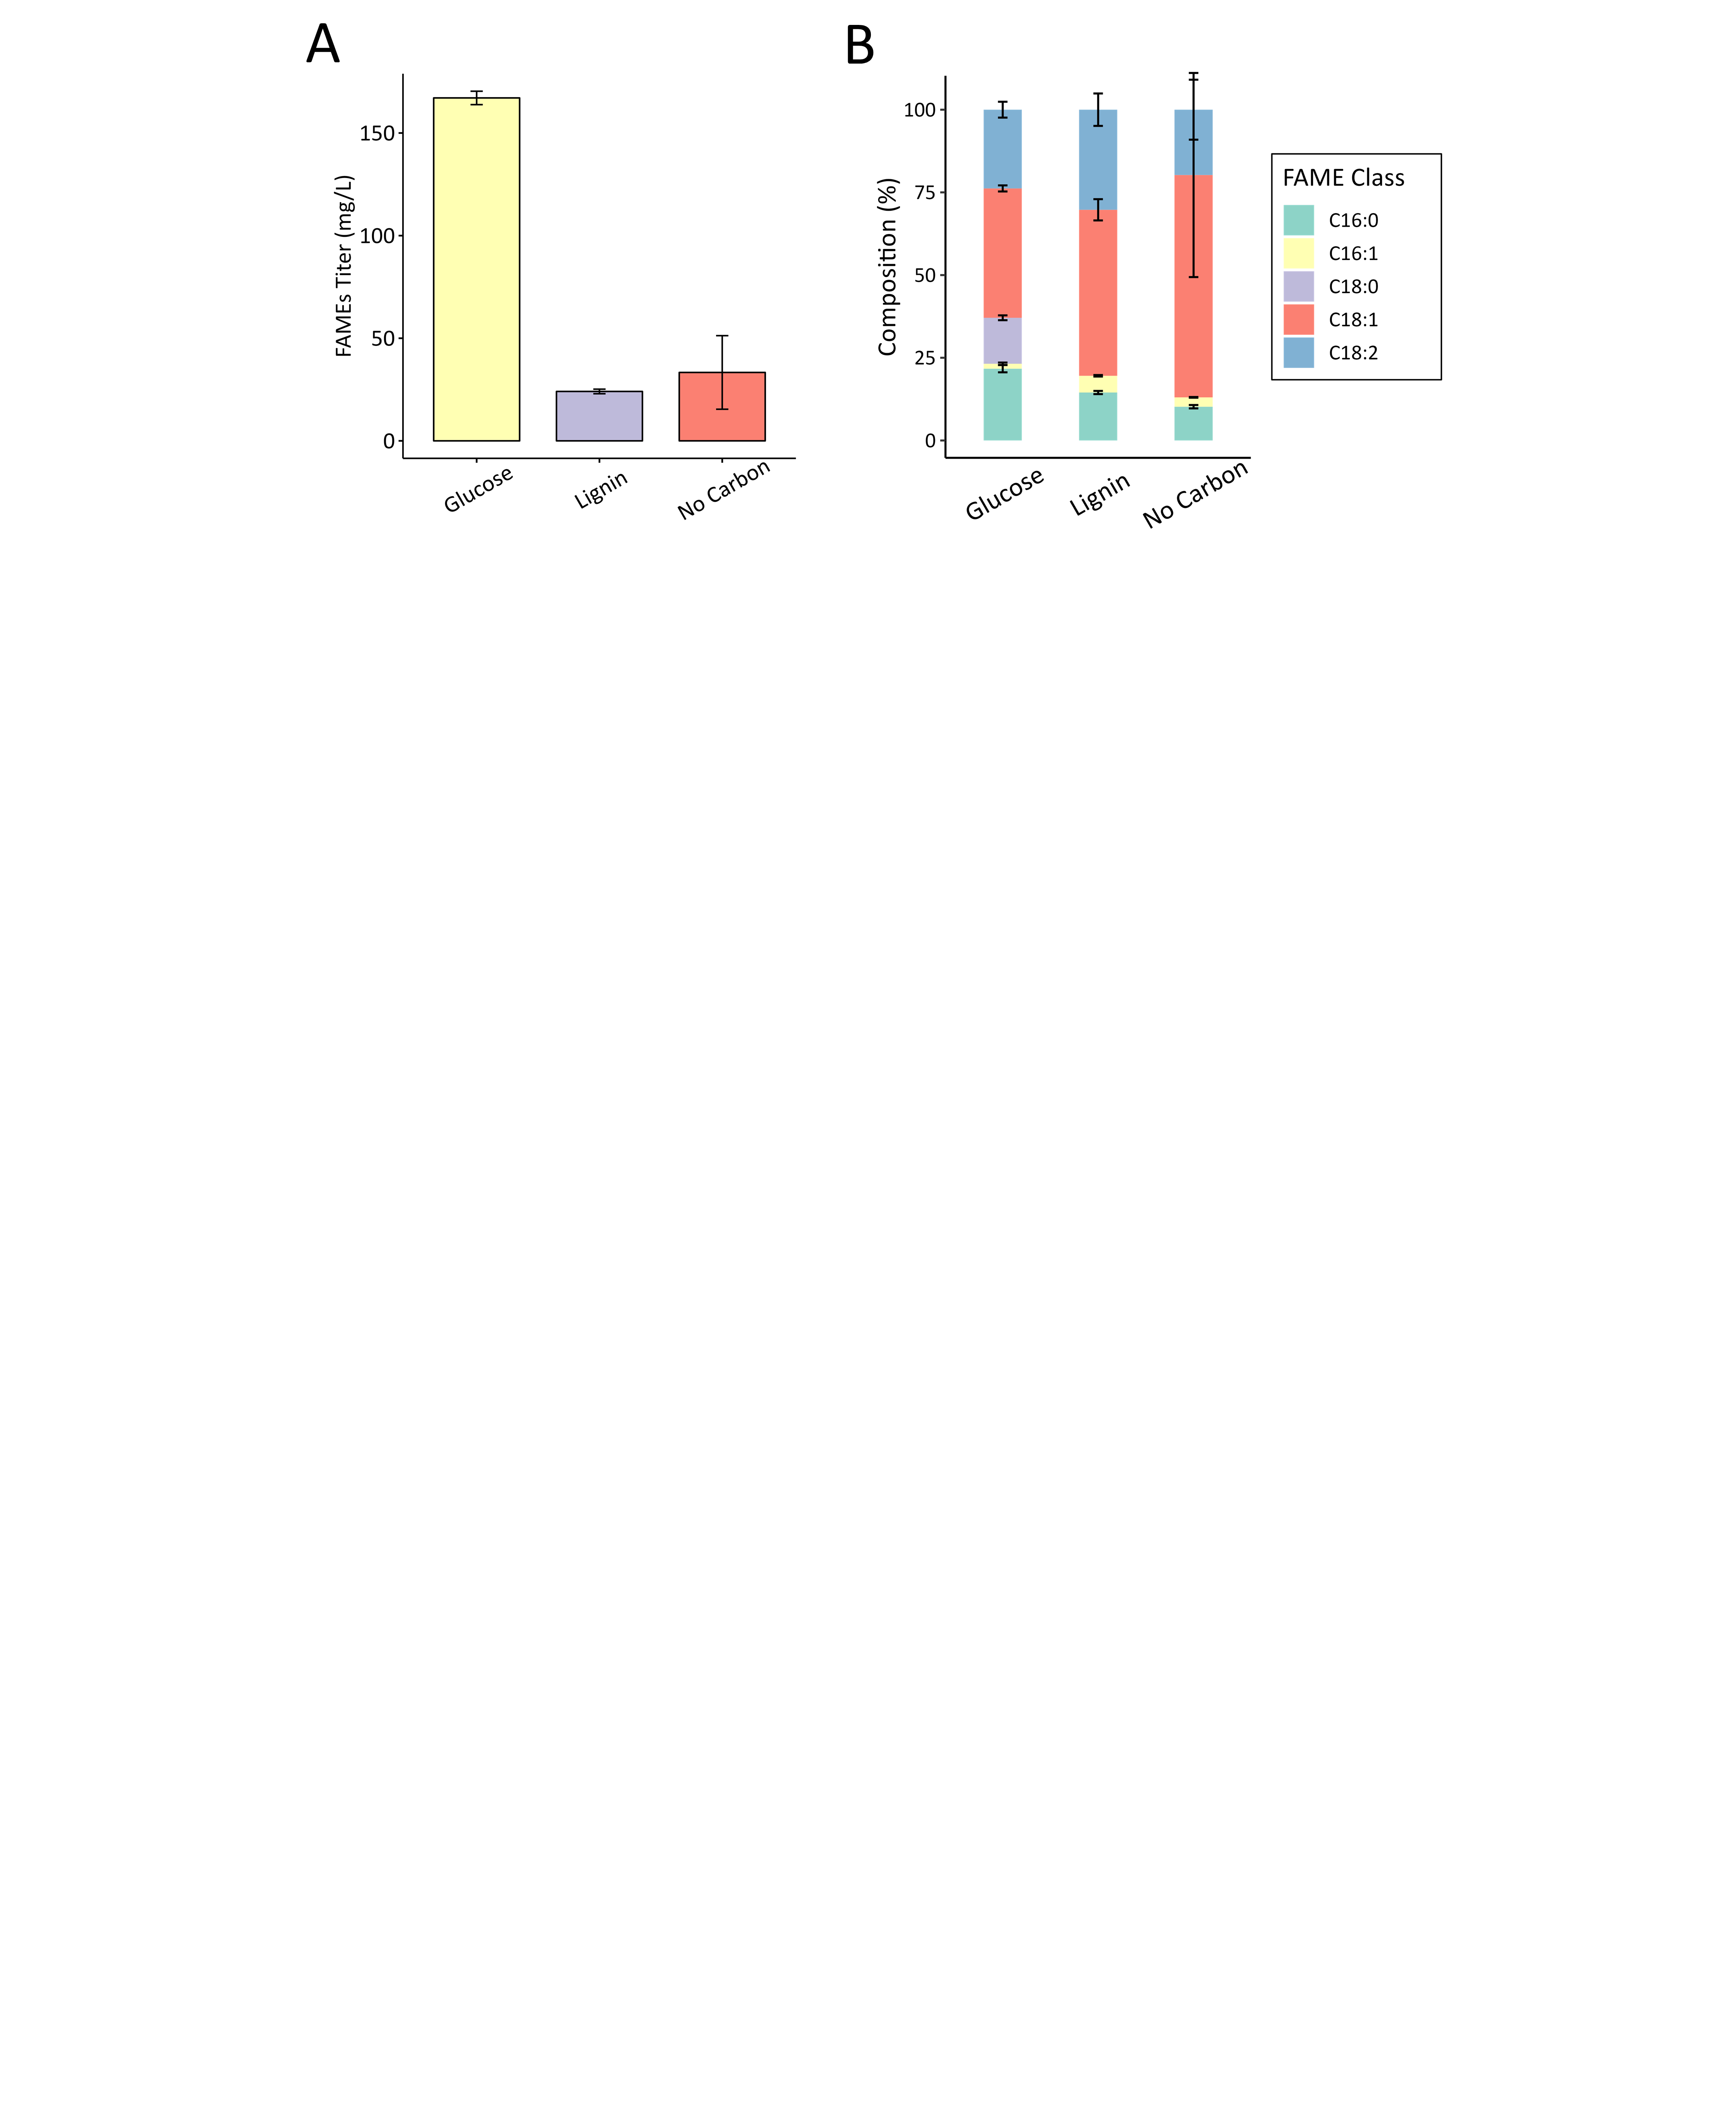


Fig. S1. FAMEs results are similar for the lignin and “No Carbon” conditions. (A) FAMEs titers approximated from the summed concentrations of the quantified species. Error bars show one standard deviation for the triplicates (B) Compositional profiles for FAMEs classes with 16 and 18 carbon chain lengths and 0–2 degrees of unsaturation. Error bars show one standard deviation for the triplicates. The high standard deviation in the “No Carbon” condition is due to two samples having overlapping C18:1 and C18:2 peaks in the GC-MS results that were difficult to accurately separate for integration.


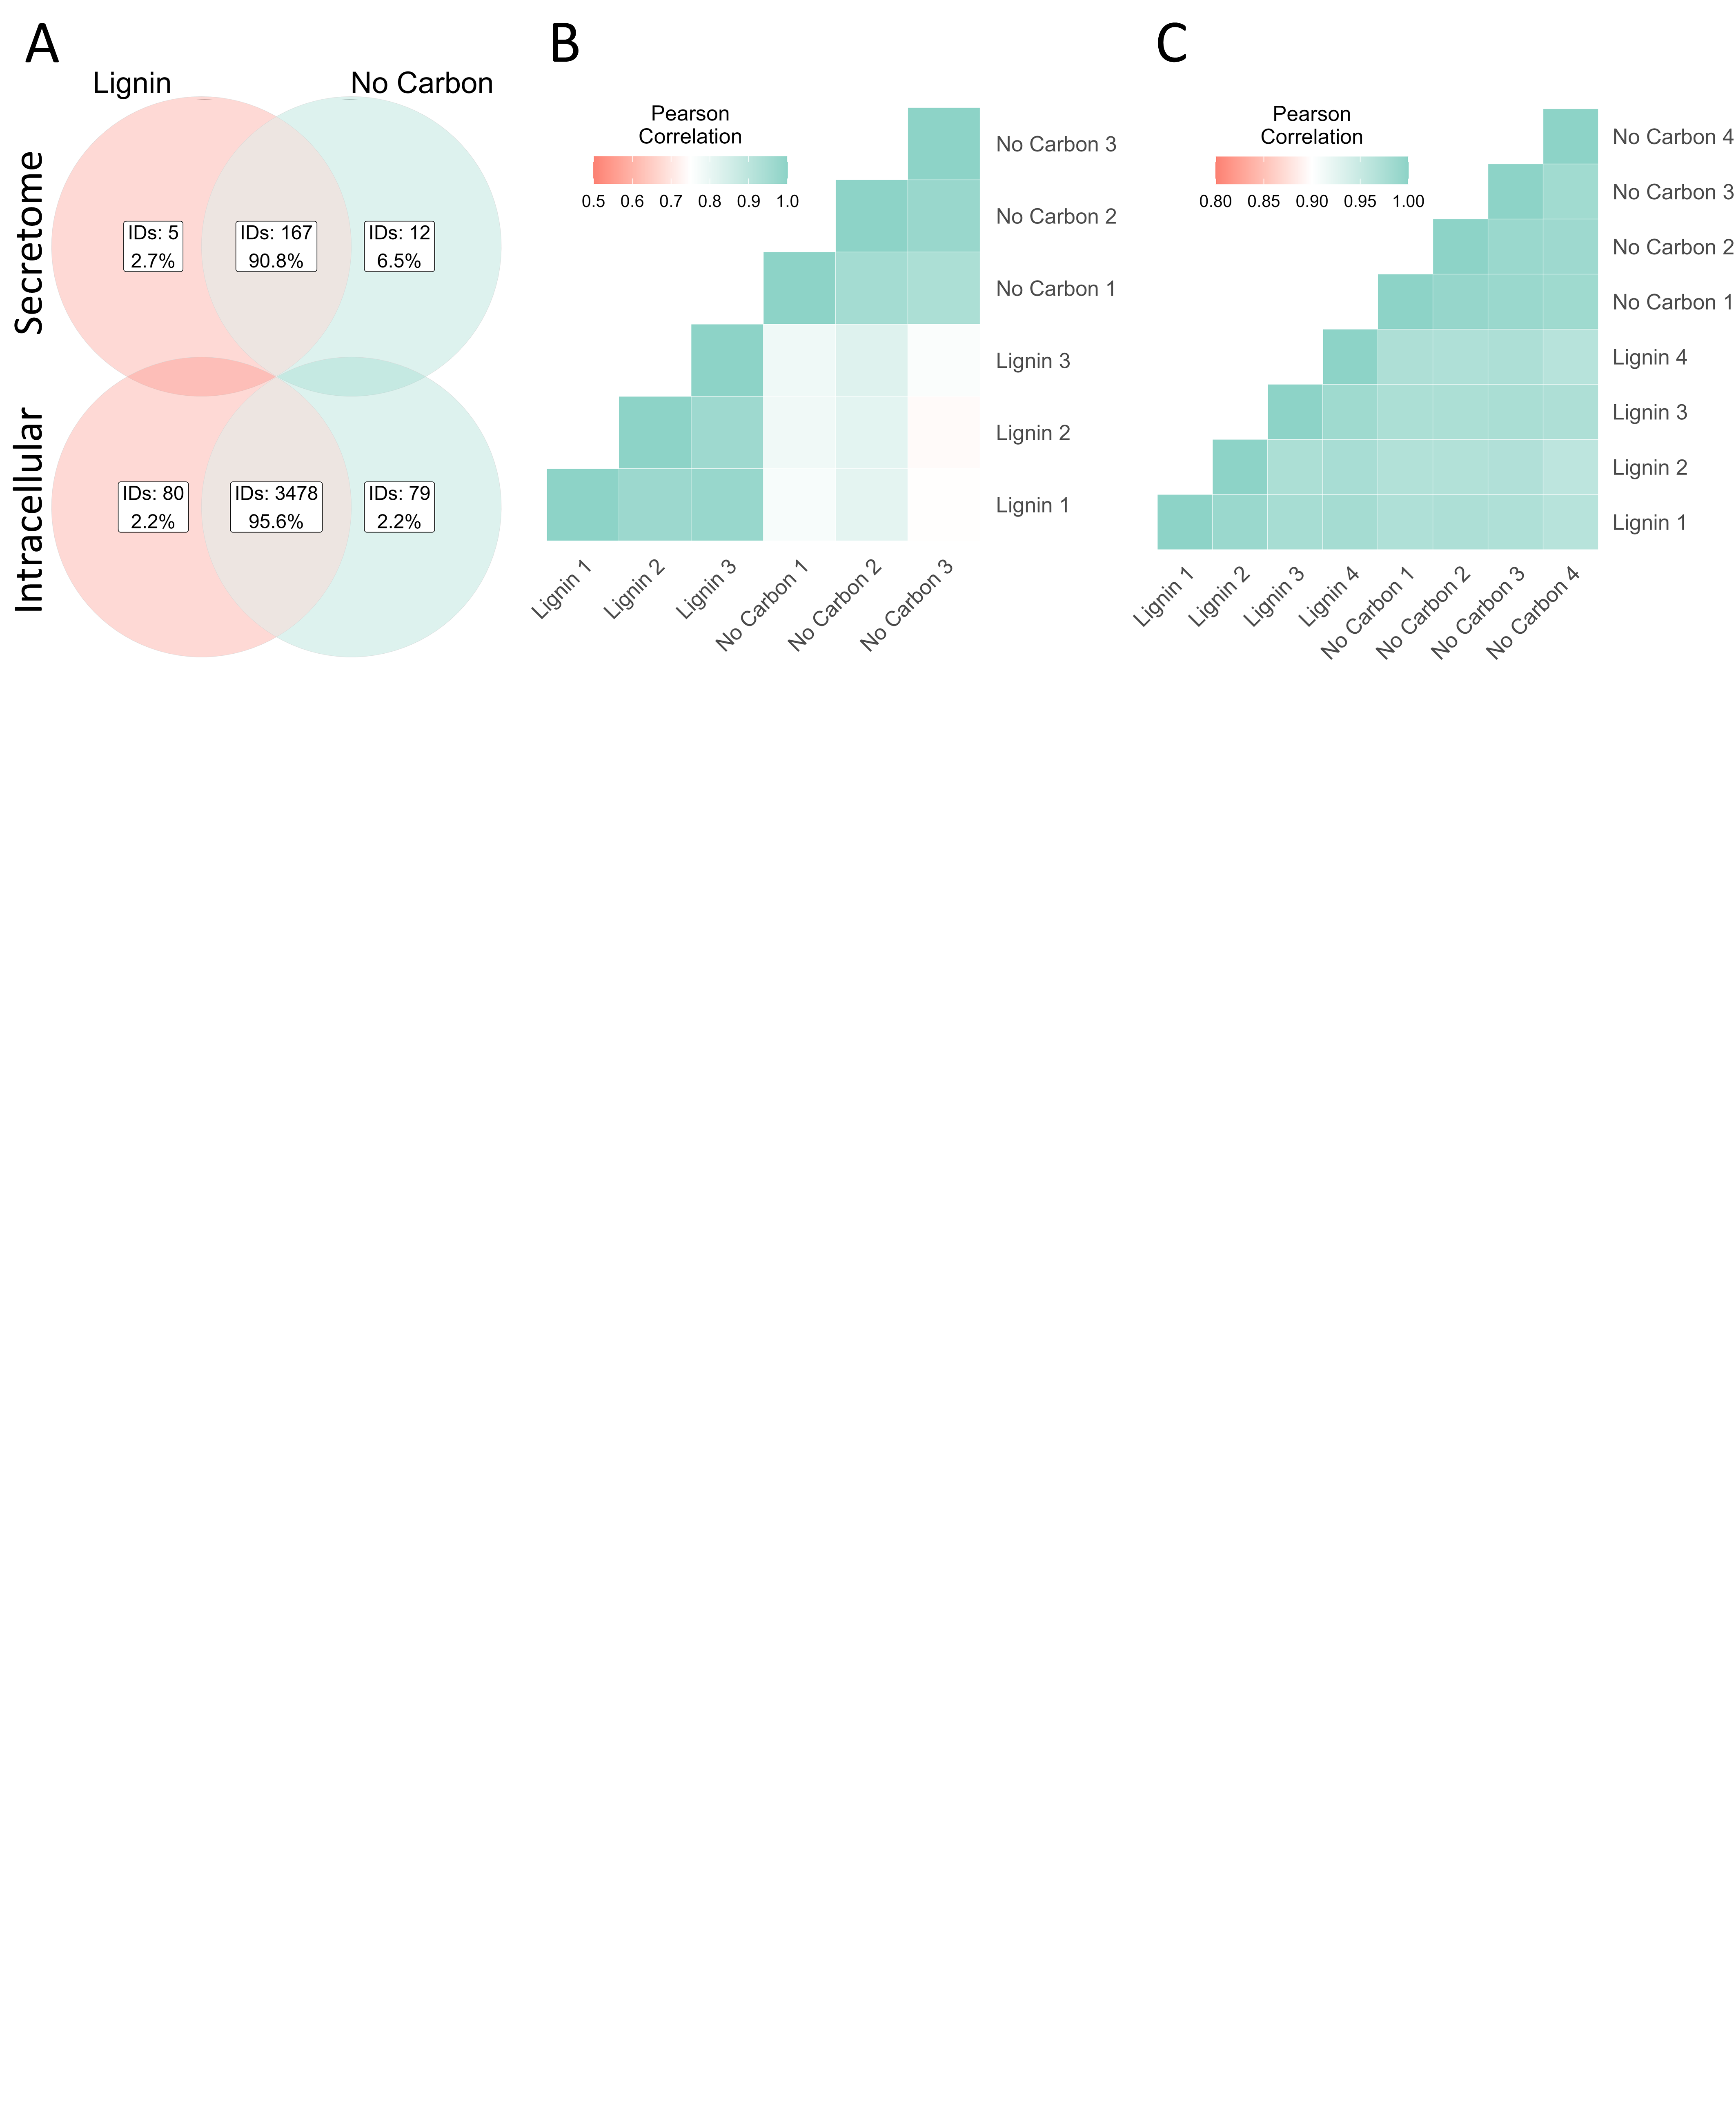


Fig. S2. Secretomics results showcase contrast between lignin and “No Carbon” conditions. (A) Venn diagrams indicating overlap of unique, quantifiable protein IDs. Only one missing LFQ intensity value was permitted among the replicates of each condition. Secretomics results were filtered using a cutoff of 0.85 for signal peptide prediction via SignalP 6.0 (75). (B) Correlogram of Pearson correlations for overlapping LFQ results from secretomics data. (C) Correlogram of Pearson correlations for cellular proteomics data.


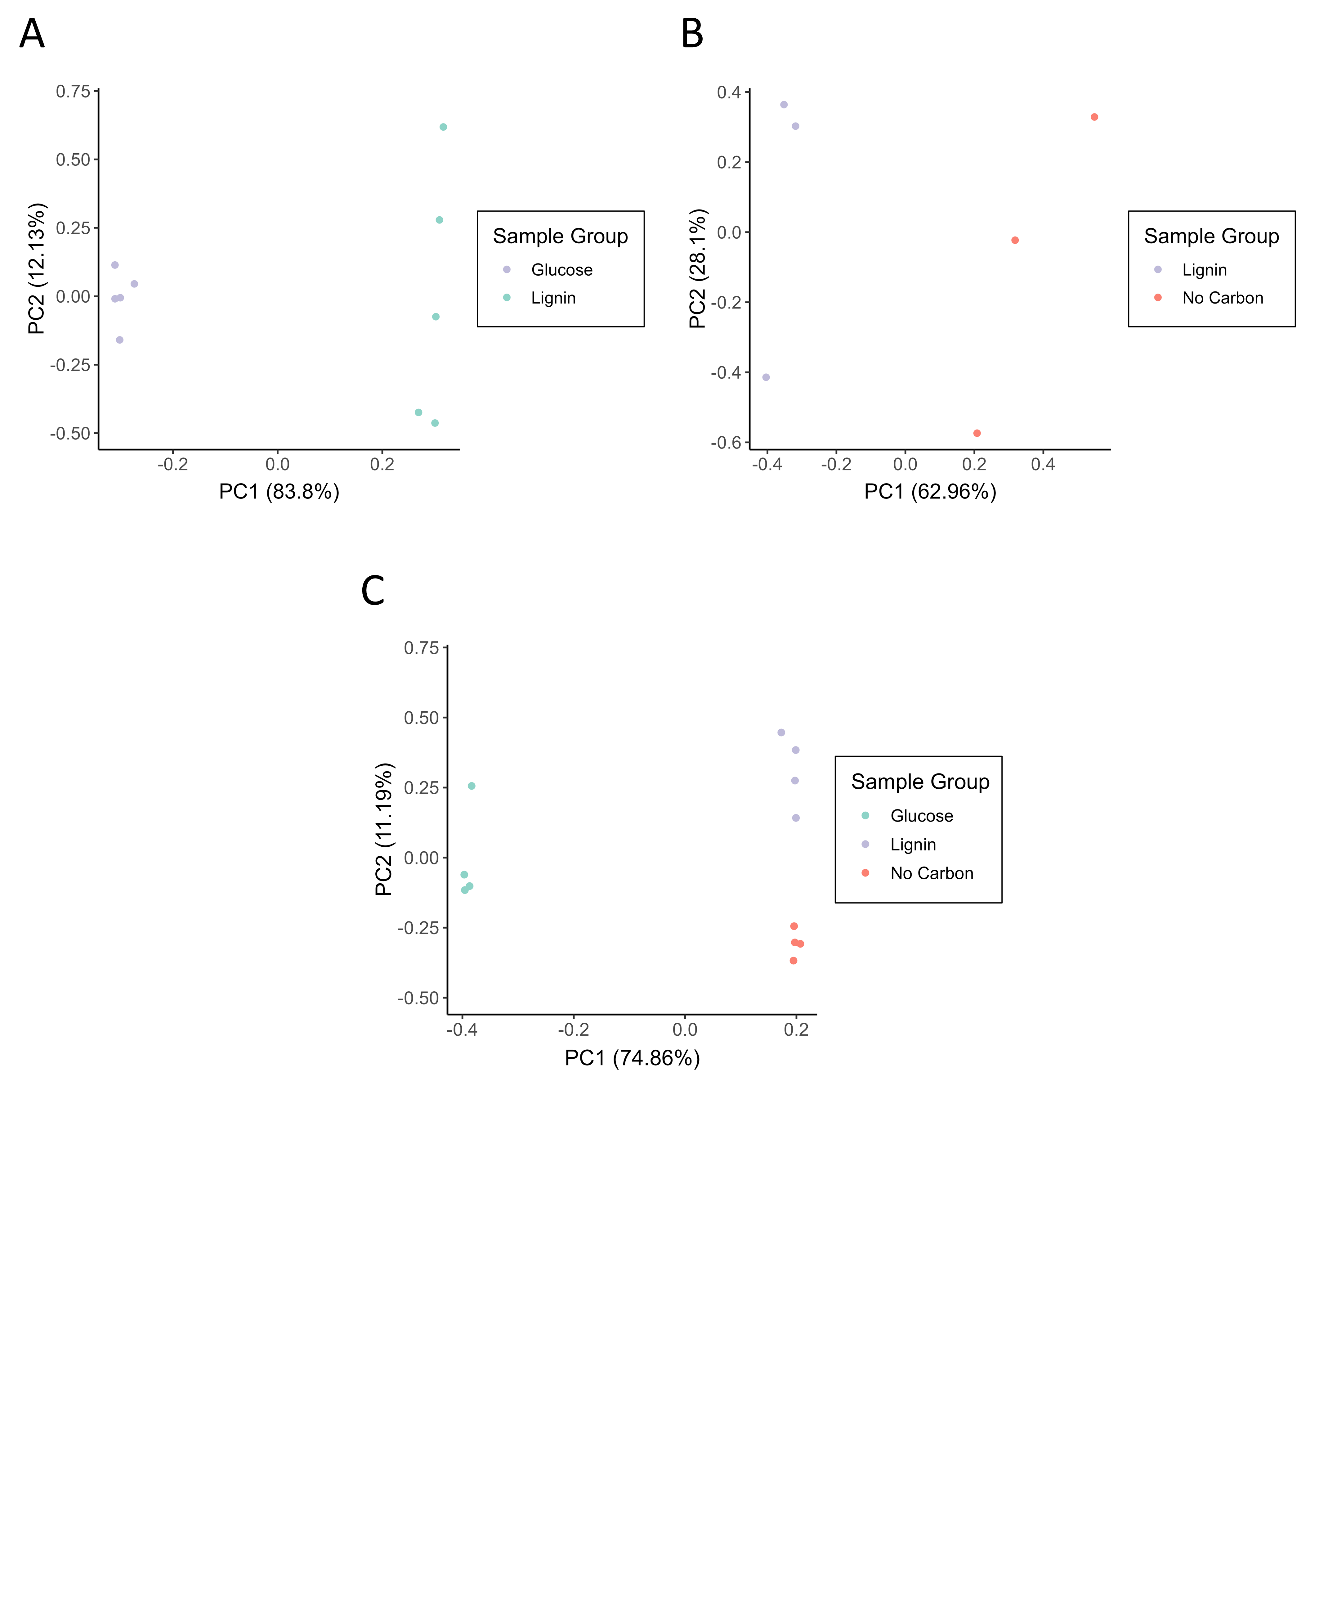


Fig. S3. Principal component analyses present clear differences among lignin, glucose, and “No Carbon” proteomics results. (A) PCA plot for glucose vs. lignin secretomics results using MaxQuant LFQ intensities for proteins observed in both conditions. (B) PCA plot for glucose vs. “No Carbon” secretomics results using MaxQuant LFQ intensities for proteins observed in both conditions. (C) PCA plot for glucose vs. “No Carbon” cellular proteomics results using MaxQuant LFQ intensities for proteins observed in all conditions.


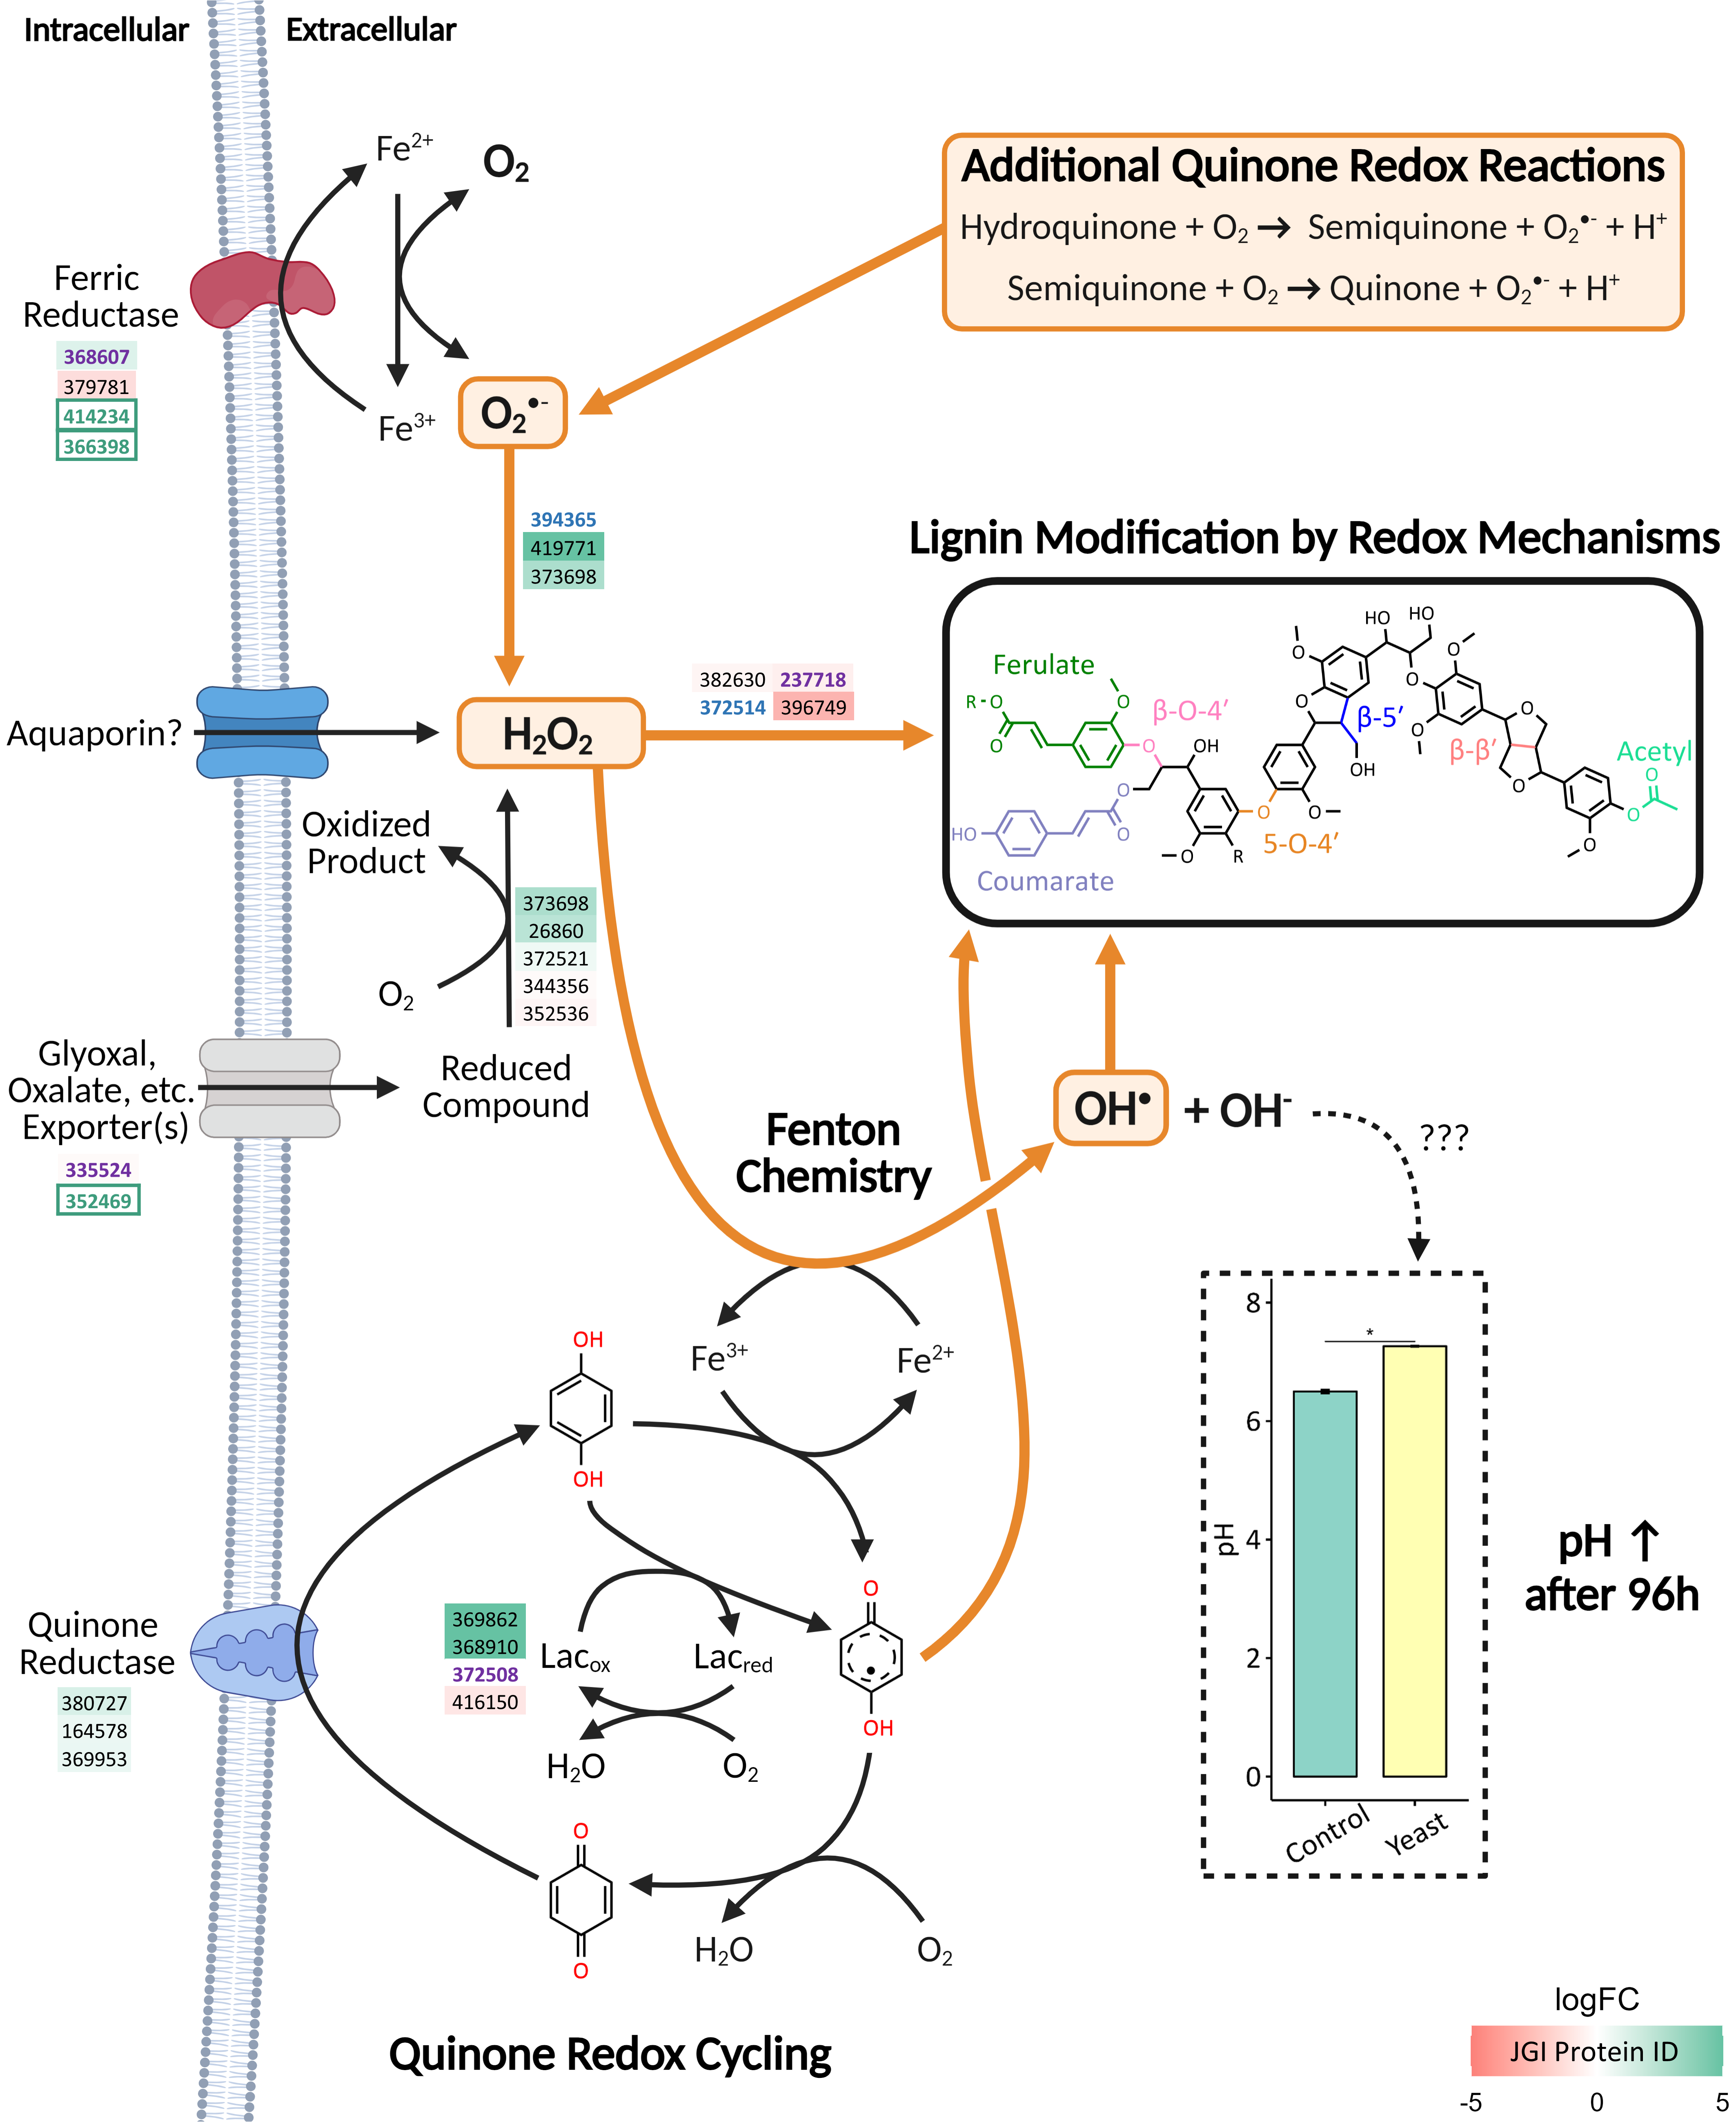


Fig. S4. Proposed proteins involved in quinone redox cycling. JGI protein IDs are included within boxes that are colored according to the average log2 foldchange of lignin vs. glucose. Note that boldface green lettering corresponds to proteins only observed in the lignin-containing samples. Boldface blue lettering corresponds to proteins that were observed, but for which no differential expression analysis could be conducted due to missing LFQ and raw intensity values. Boldface purple lettering corresponds to IDs for which raw intensity values were used in DEP differential expression analysis due to missing LFQ intensity values. A bar chart inlay is included to show that an increase in pH may partially be explained by the OH- byproduct of quinone redox cycling. Error bars in this bar chart represent one standard deviation of triplicates. The small asterisk above the bar chart denotes a p-value below 0.05 from the two-sample t-test.


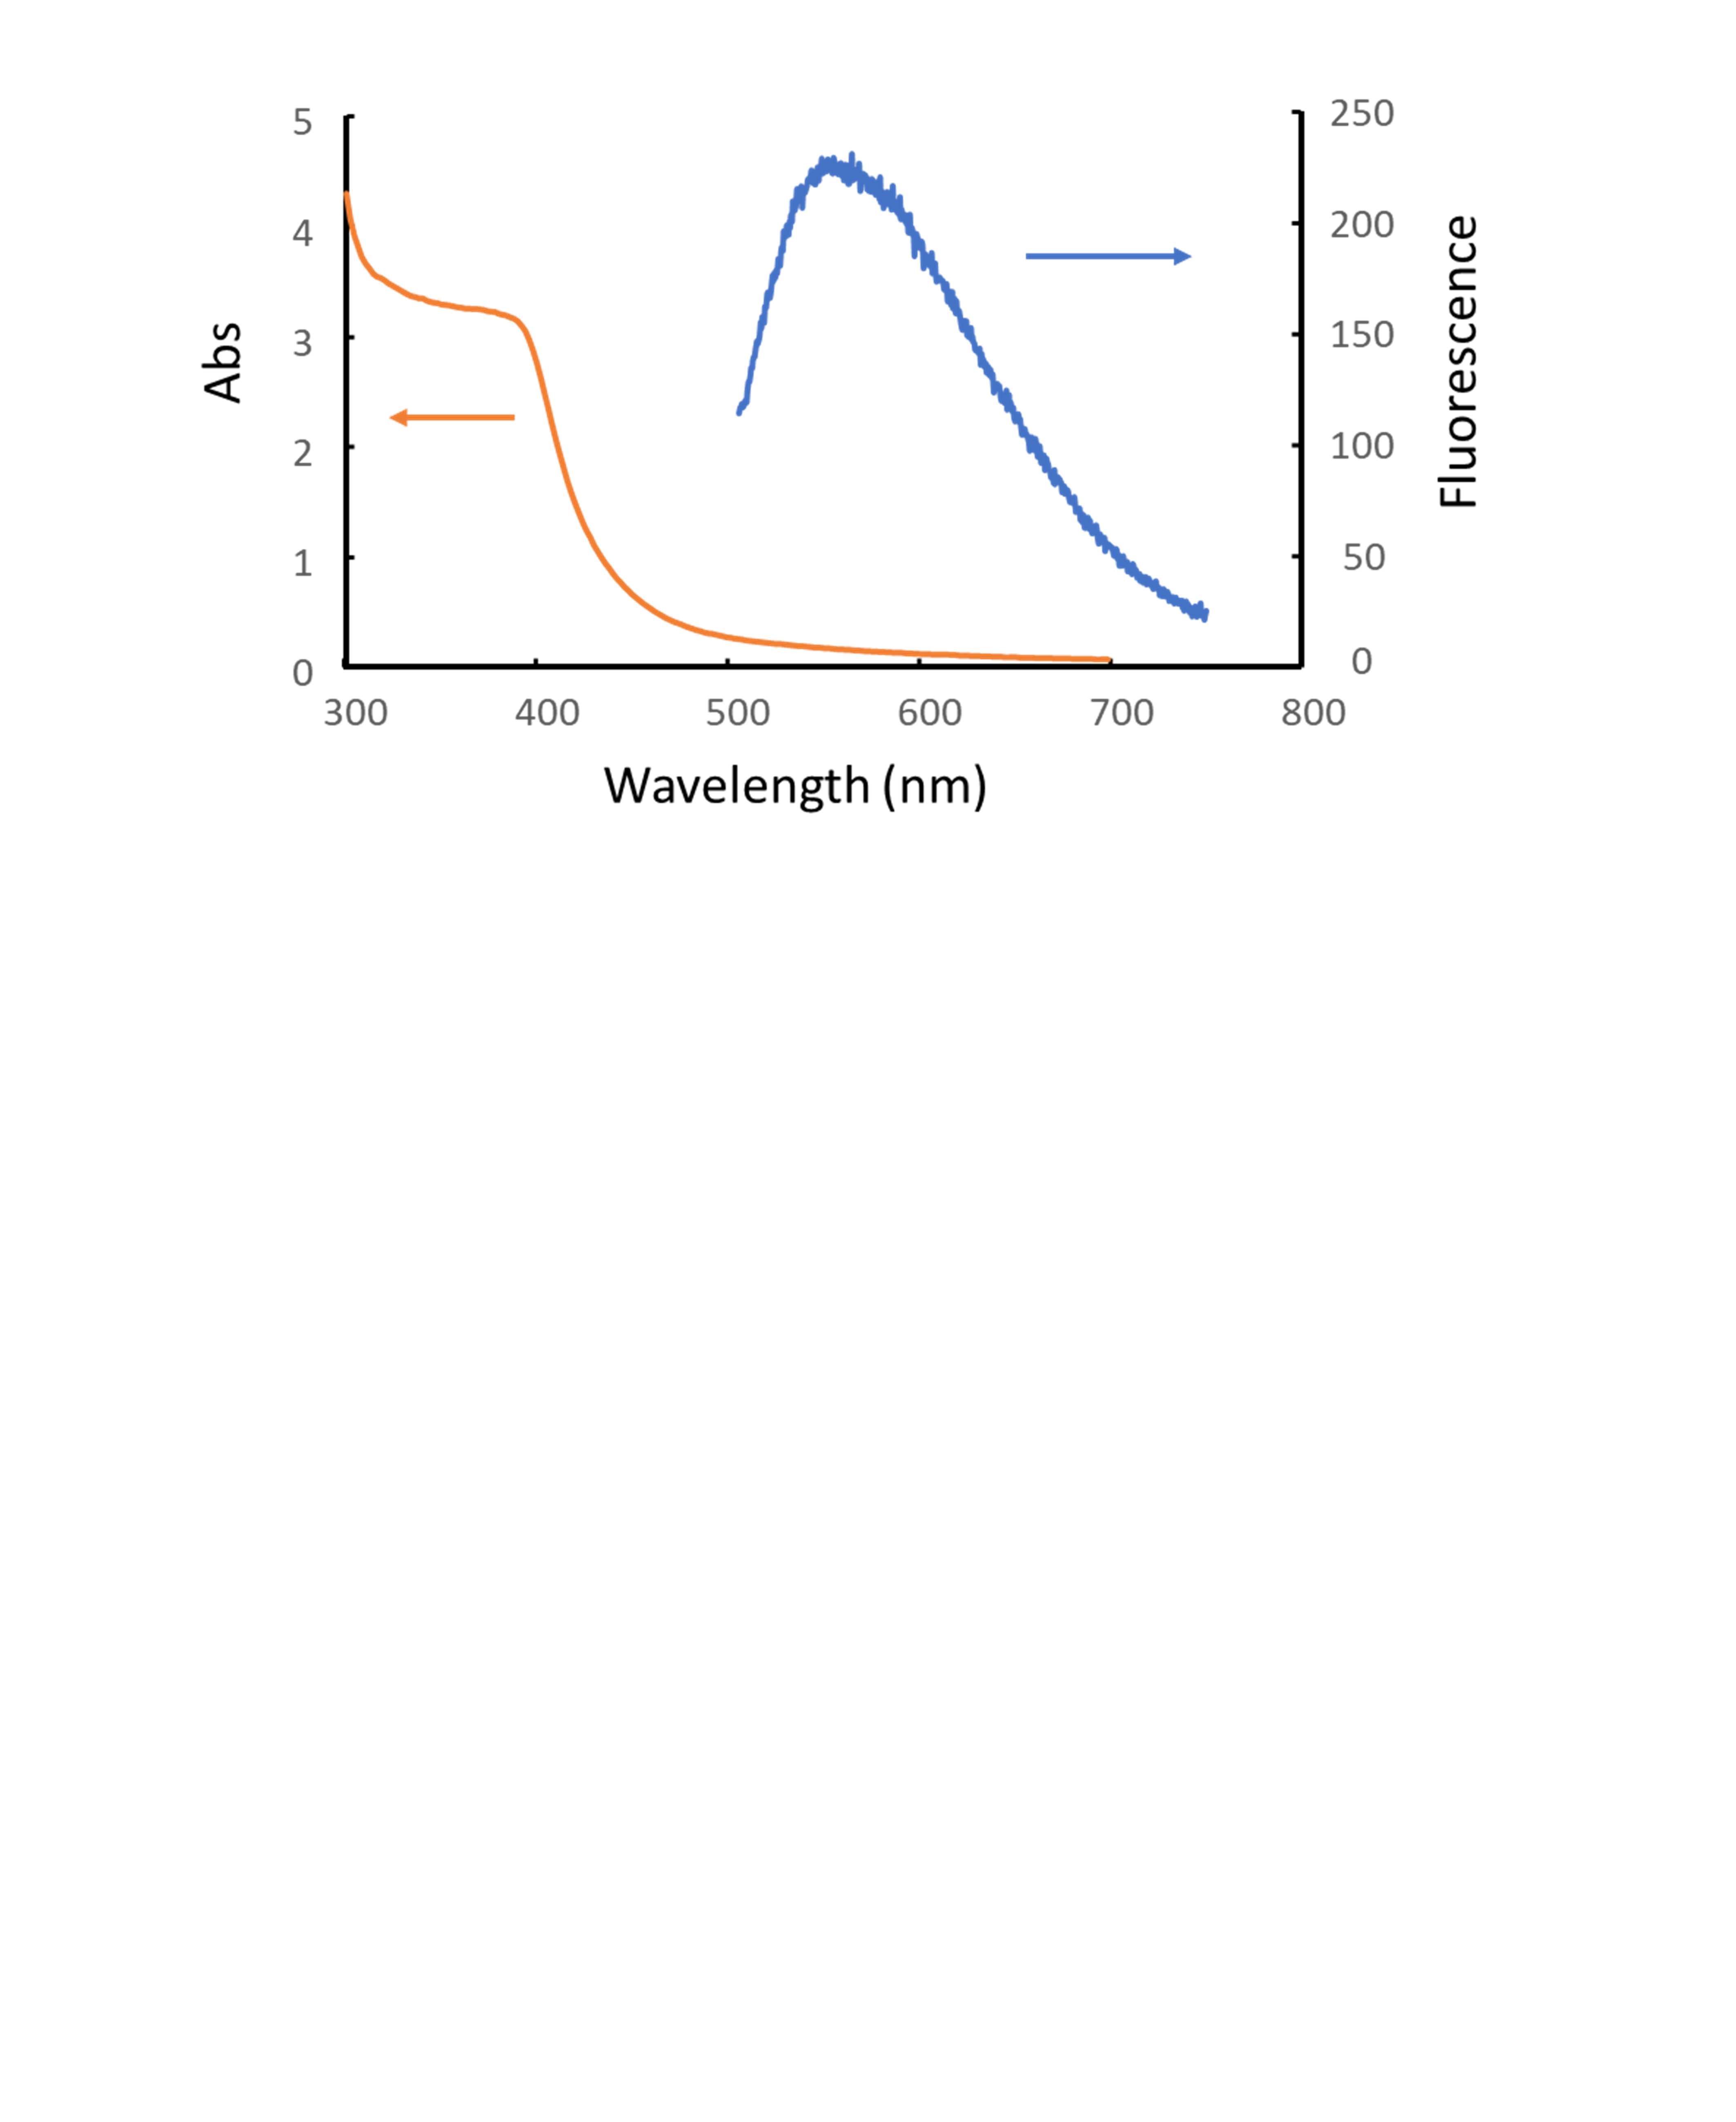


Fig. S5. The absorption spectrum of lignin (left) and the emission spectrum (right) from 490 nm wavelength excitation.


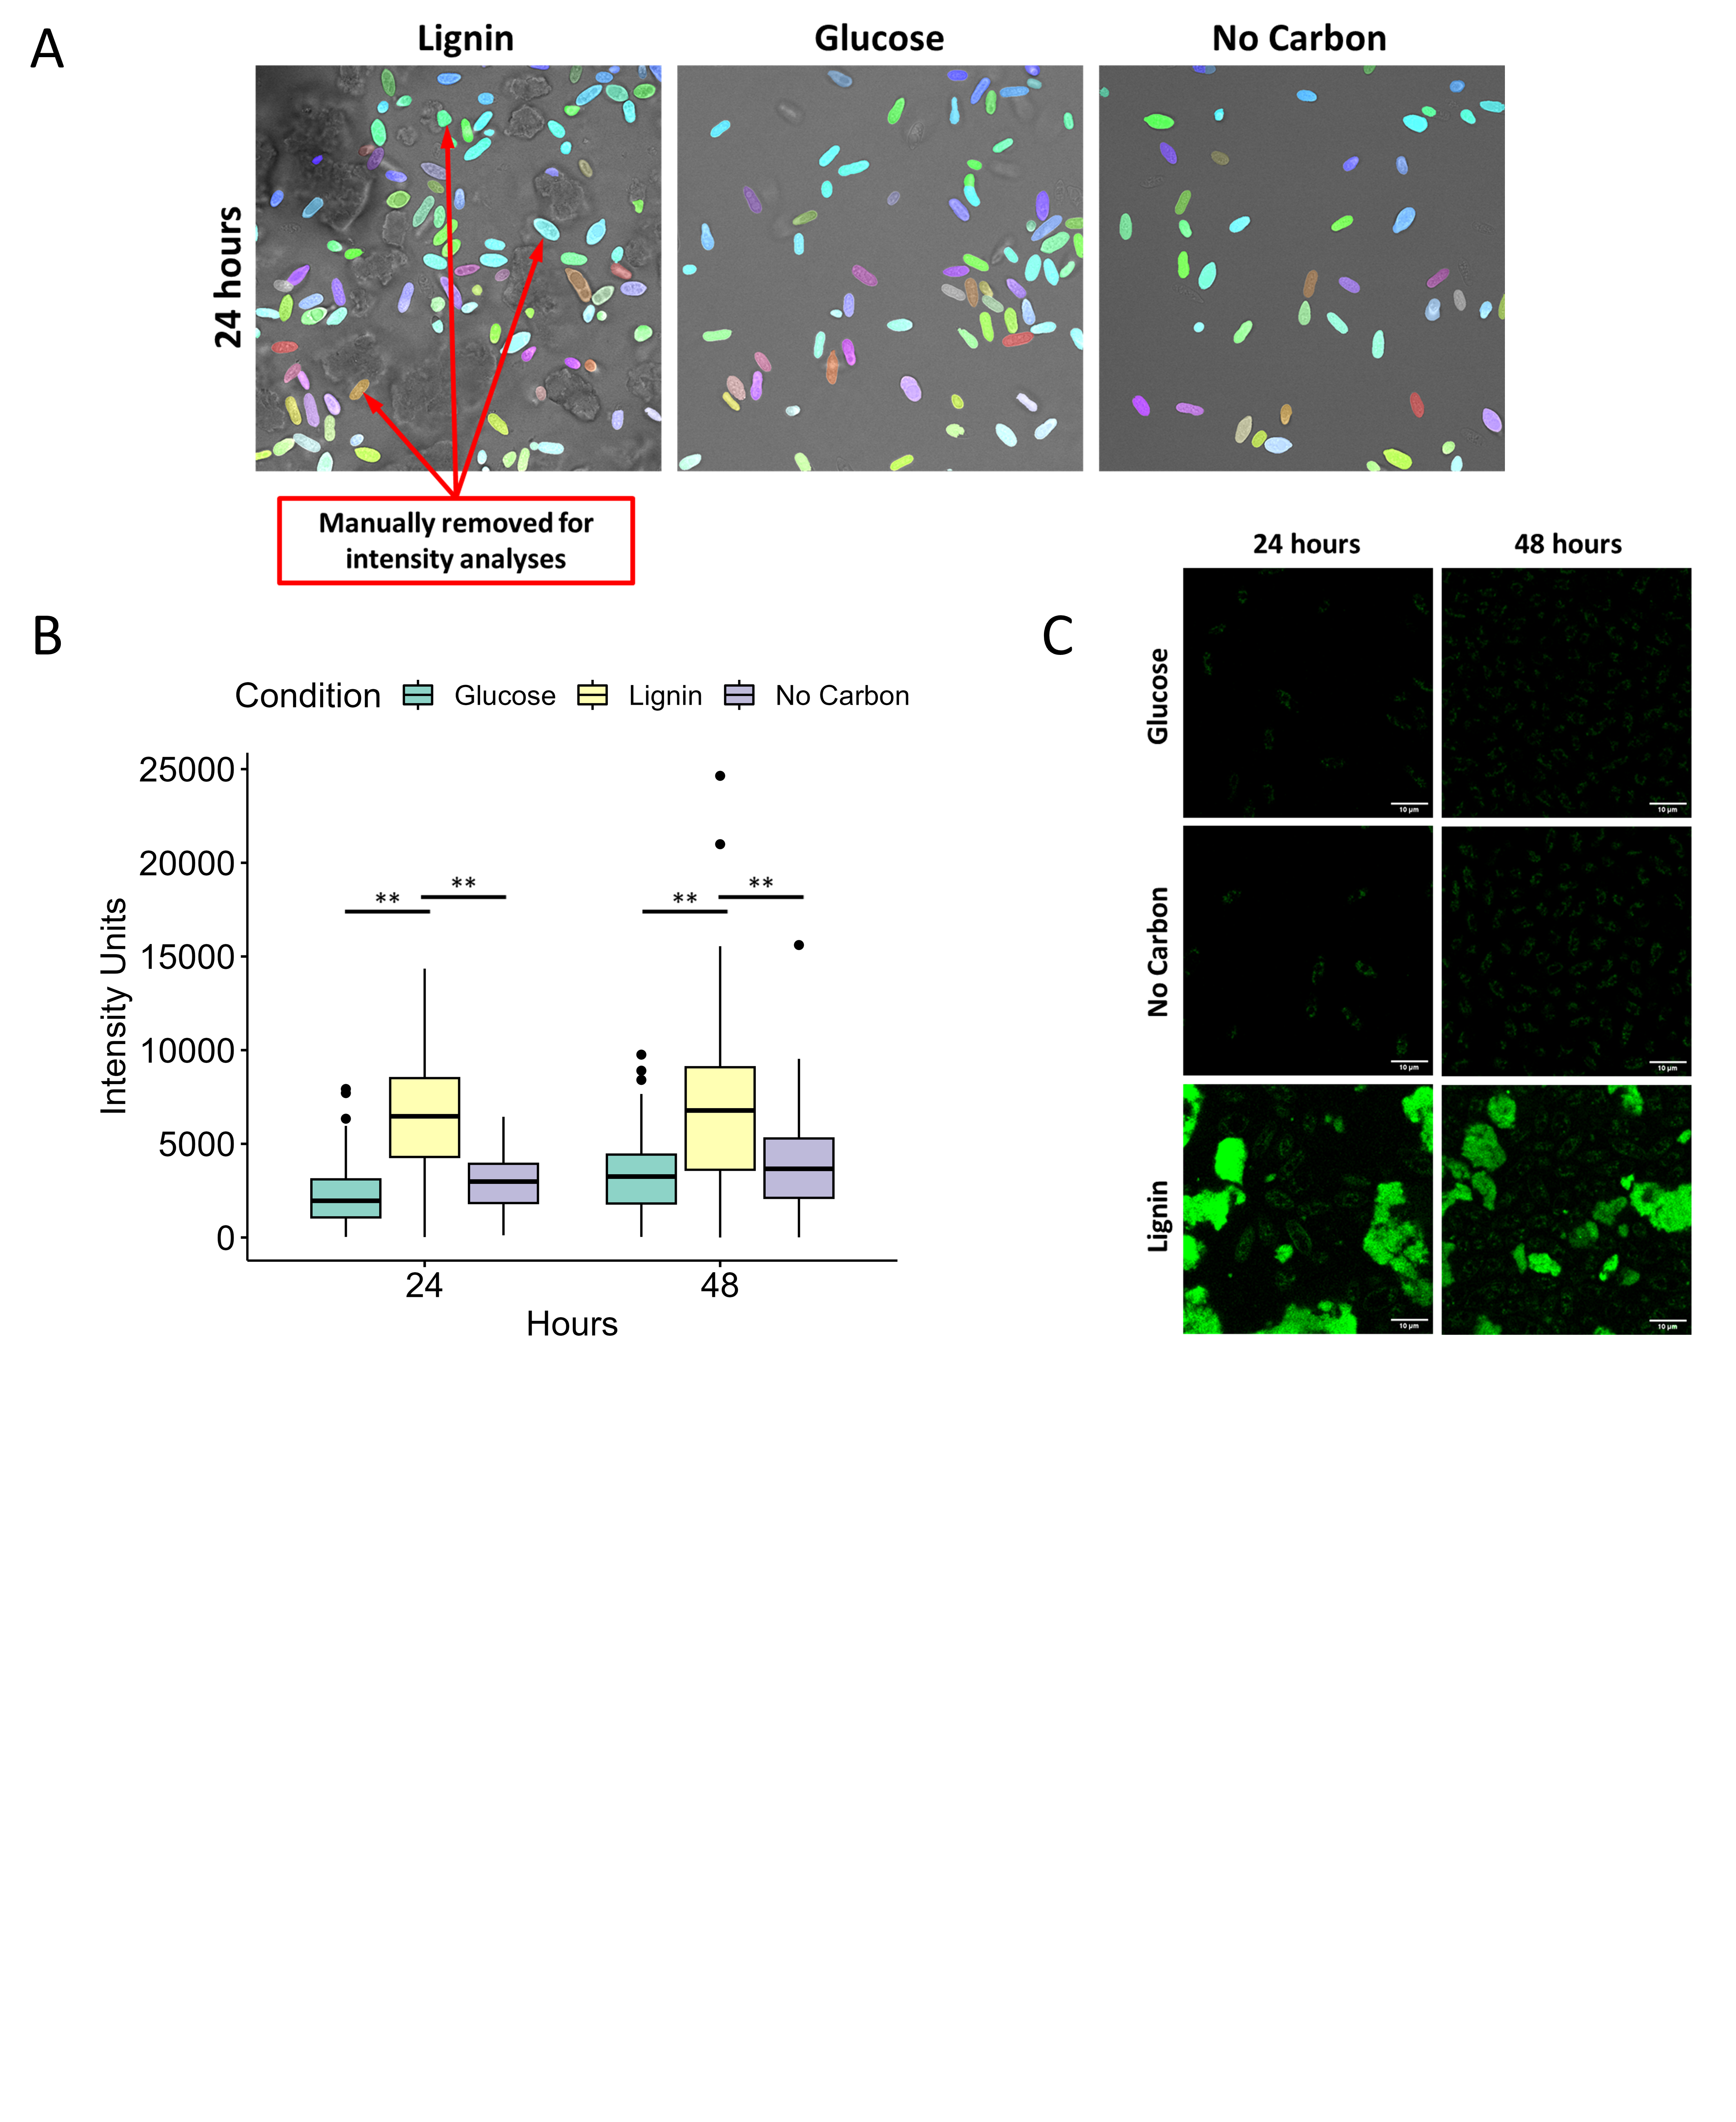


Fig. S6. Additional results from microscopy experimentation demonstrating higher fluorescence in lignin-cultivated yeast cells. (A) Example bright-field images processed by Cellpose (66). Individual cells are labeled with different colors. Note that intensity values for cells overlapping with lignin particles were manually removed prior to cell population analyses shown here in panel (B) as well as Fig. 4B. (B) Results of an additional experiment confirming high fluorescence intensities of lignin-cultivated cell populations vs. glucose and No Carbon conditions. Fluorescence intensities of cell populations in three images were averaged then these three mean values were used for t-tests. Significance levels from two-sample t-tests are included as asterisks in the box plots. All pairwise comparisons against lignin yielded adjusted p-values < 0.01.

**Supplementary Tables**

| **% Ash** | **% Total Lignin** | **% Glucan** | **% Xylan** | **% Arabinan** | **% Acetate** | **% Balance** |
| --- | --- | --- | --- | --- | --- | --- |
| 0.30 ± 0.24 | 87.06 ± 0.31 | 1.93 ± 0.15 | 4.12 ± 0.45 | 1.69 ± 0.20 | 7.17 ± 0.08 | 102.27 |

* Average ± One Standard Deviation is shown.

**Table S1**. K-Lignin compositional analysis of alkali-purified corn stover lignin.

Table S2. Protein recovery estimates from 20 mL of concentrated culture supernatants.

* There are different numbers of replicates because two separate batches of secretomics samples (Lignin vs. No Carbon & Lignin vs. Glucose) were processed. Lignin interferes with the BCA protein assay, so samples were normalized to a 0.5 µg loading according to quantitative fluorometric peptide assay results prior to LC-MS/MS sample submission.

| **Designation*** | **Concentration (µg/µL)** | **Avg.**  **(µg/µL)** | **Stdev.**  **(µg/µL)** | **Total Protein Estimate (µg)** |
| --- | --- | --- | --- | --- |
| No Carbon 1 | 0.081 | 0.089 | 0.007 | 17.8 |
| No Carbon 2 | 0.093 |
| No Carbon 3 | 0.093 |
| Glucose 1 | 0.401 | 0.398 | 0.031 | 79.7 |
| Glucose 2 | 0.357 |
| Glucose 3 | 0.407 |
| Glucose 4 | 0.386 |
| Glucose 5 | 0.441 |

Table S3. SP3 lignin removal according to UV absorbance at 320 nm using a medium blank.

| **Designation*** | **Process Step**† | **Corrected UV Abs.**‡ | **% Removal** | **Avg. % Removal** | **Stdev. % Removal** |
| --- | --- | --- | --- | --- | --- |
| Blank 1 | Concentrate | 319.68 |  |  |  |
| Blank 2 | Concentrate | 378.08 |  |  |  |
| Blank 1 | Final | 2.59 | 99.19 | 99.17 | 0.03 |
| Blank 2 | Final | 3.24 | 99.14 |

* Duplicates of lignin medium control (“Blank”)

† Concentrate = Lignin medium after molecular weight concentration; Final = After SP3 cleanup

‡ Total UV absorbance units corrected for dilutions (160 for “Concentrate” and 7 for “Final”) and volumes

Table S4. Proteomics results summary.

| **Condition (vs. Lignin)** | **Proteome** | **Replicates** | **Total IDs*** | **IDs for DE†** | **SignalP IDs‡** | **Lignin Only LFQ IDs§** | **% Missed Cleavage** |
| --- | --- | --- | --- | --- | --- | --- | --- |
| No Carbon | Secretome | 3 | 2307 | 1156 | 184 | 24 | 2.9 |
| Glucose | Secretome | 5 | 3253 | 1774 | 245 | 382 | 4 |
| No Carbon | Cellular | 4 | 3759 | 2329 | 115 | 87 | 9.5 |
| Glucose | Cellular | 4 | 2343 | 86 |

Secretomics data for the different experiments were processed and, thus, analyzed separately

* Total IDs = Total number of unique MaxQuant identifications after removing contaminants, reverse IDs, etc.

† DE = Differential Expression analysis

‡ Total number of unique MaxQuant IDs filtered using a SignalP score ≥ 0.85

§ Filtering for at least one LFQ value observed among the replicates of the lignin condition

Dataset S1 (separate file). MaxQuant and differential expression data used for secretomics analyses.

Dataset S2 (separate file). MaxQuant and differential expression data used for cellular proteomics analyses.

Dataset S3 (separate file). BLASTp alignment searches for ligninolytic and aromatics catabolic enzymes from functionally characterized and related microorganisms.

**SI References**

1. C. F. Thurston, The structure and function of fungal laccases. *Microbiology* **140**, 19–26 (1994).

2. T. Glumoff, *et al.*, Lignin peroxidase from Phanerochaete-chrysosporium. *Eur. J. Biochem.* **187**, 515–520 (1990).

3. J. M. Smeekens, H. Xiao, R. Wu, Global Analysis of Secreted Proteins and Glycoproteins in Saccharomyces cerevisiae. *J. Proteome Res.* **16**, 1039–1049 (2017).

4. C. S. Hughes, *et al.*, Single-pot, solid-phase-enhanced sample preparation for proteomics experiments. *Nat. Protoc.* **14**, 68–85 (2019).

5. T. Müller, *et al.*, Automated sample preparation with SP3 for low-input clinical proteomics. *Mol. Syst. Biol.* **16**, e9111 (2020).

6. M. Sielaff, *et al.*, Evaluation of FASP, SP3, and iST Protocols for Proteomic Sample Preparation in the Low Microgram Range. *J. Proteome Res.* **16**, 4060–4072 (2017).

7. S. Moggridge, P. H. Sorensen, G. B. Morin, C. S. Hughes, Extending the Compatibility of the SP3 Paramagnetic Bead Processing Approach for Proteomics. *J. Proteome Res.* **17**, 1730–1740 (2018).

8. D. Lampaki, A. Diepold, T. Glatter, A Serial Sample Processing Strategy with Improved Performance for in-Depth Quantitative Analysis of Type III Secretion Events in *Pseudomonas aeruginosa*. *J. Proteome Res.* **19**, 543–553 (2020).

9. S. Knecht, H. C. Eberl, M. Bantscheff, Interval-Based Secretomics Unravels Acute-Phase Response in Hepatocyte Model Systems. *Mol. Cell. Proteomics* **21**, 100241 (2022).

10. M. HaileMariam, *et al.*, S-Trap, an Ultrafast Sample-Preparation Approach for Shotgun Proteomics. *J. Proteome Res.* **17**, 2917–2924 (2018).

11. D. D. Laskar, M. P. Tucker, X. Chen, G. L. Helms, B. Yang, Noble-metal catalyzed hydrodeoxygenation of biomass-derived lignin to aromatic hydrocarbons. *Green Chem.* **16**, 897–910 (2014).

12. O. Ozbek, K. O. Ulgen, N. Ileri Ercan, The Toxicity of Polystyrene-Based Nanoparticles in *Saccharomyces cerevisiae* Is Associated with Nanoparticle Charge and Uptake Mechanism. *Chem. Res. Toxicol.* **34**, 1055–1068 (2021).

13. H. Nakamura, S. Watano, Direct Permeation of Nanoparticles across Cell Membrane: A Review. *KONA Powder Part. J.* **35**, 49–65 (2018).

14. P. N. Lipke, R. Ovalle, Cell Wall Architecture in Yeast: New Structure and New Challenges. *J. Bacteriol.* **180**, 3735–3740 (1998).

15. X. Lu, X. Zheng, X. Li, J. Zhao, Adsorption and mechanism of cellulase enzymes onto lignin isolated from corn stover pretreated with liquid hot water. *Biotechnol. Biofuels Bioprod.* **9**, 118 (2016).

16. M. Ashengroph, J. Amini, Bioconversion of isoeugenol to vanillin and vanillic acid using the resting cells of *Trichosporon asahii*. *3 Biotech* **7**, 358 (2017).

17. J. Casey, R. Dobb, Microbial routes to aromatic aldehydes. *Enzyme Microb. Technol.* **14**, 739–747 (1992).

18. S. R. Jia, J. D. Cui, Y. Li, A. Y. Sun, Production of L-phenylalanine from trans-cinnamic acids by high-level expression of phenylalanine ammonia lyase gene from *Rhodosporidium toruloides* in *Escherichia coli*. *Biochem. Eng. J.* **42**, 193–197 (2008).

19. P. T. Adeboye, M. Bettiga, L. Olsson, ALD5, PAD1, ATF1 and ATF2 facilitate the catabolism of coniferyl aldehyde, ferulic acid and *p*-coumaric acid in *Saccharomyces cerevisiae*. *Sci. Rep.* **7**, 42635 (2017).

20. O. Konzock, S. Zaghen, J. Norbeck, Tolerance of *Yarrowia lipolytica* to inhibitors commonly found in lignocellulosic hydrolysates. *BMC Microbiol.* **21**, 77 (2021).

21. Y. Iwasaki, *et al.*, Novel metabolic pathway for salicylate biodegradation via phenol in yeast *Trichosporon moniliiforme*. *Biodegradation* **21**, 557–564 (2010).

22. S. Bartsch, U. T. Bornscheuer, Mutational analysis of phenylalanine ammonia lyase to improve reactions rates for various substrates. *Protein Eng. Des. Sel.* **23**, 929–933 (2010).

23. O. Konzock, M. Tous-Mohedano, I. Cibin, Y. Chen, J. Norbeck, Cinnamic acid and *p*-coumaric acid are metabolized to 4-hydroxybenzoic acid by *Yarrowia lipolytica*. *AMB Express* **13**, 84 (2023).

24. S. S. Ali, *et al.*, Could termites be hiding a goldmine of obscure yet promising yeasts for energy crisis solutions based on aromatic wastes? A critical state-of-the-art review. *Biotechnol. Biofuels Bioprod.* **15**, 35 (2022).

25. C. del Cerro, *et al.*, Intracellular pathways for lignin catabolism in white-rot fungi. *Proc. Natl. Acad. Sci.* **118**, e2017381118 (2021).

26. T. Abe, E. Masai, K. Miyauchi, Y. Katayama, M. Fukuda, A Tetrahydrofolate-Dependent *O*-Demethylase, LigM, Is Crucial for Catabolism of Vanillate and Syringate in *Sphingomonas paucimobilis* SYK-6. *J. Bacteriol.* **187**, 2030–2037 (2005).

27. W. Broos, *et al.*, *Rhodotorula kratochvilovae* outperforms *Cutaneotrichosporon oleaginosum* in the valorisation of lignocellulosic wastewater to microbial oil. *Process Biochem.* **137**, 229–238 (2024).

28. H. Doddapaneni, R. Chakraborty, J. S. Yadav, Genome-wide structural and evolutionary analysis of the P450 monooxygenase genes (P450ome) in the white rot fungus *Phanerochaete chrysosporium* : Evidence for gene duplications and extensive gene clustering. *BMC Genomics* **6**, 92 (2005).

29. S. J. B. Mallinson, *et al.*, A promiscuous cytochrome P450 aromatic *O*-demethylase for lignin bioconversion. *Nat. Commun.* **9**, 2487 (2018).

30. N. Kamimura, *et al.*, Bacterial catabolism of lignin-derived aromatics: New findings in a recent decade: Update on bacterial lignin catabolism. *Environ. Microbiol. Rep.* **9**, 679–705 (2017).

31. A. K. Meier, *et al.*, Agdc1p – a Gallic Acid Decarboxylase Involved in the Degradation of Tannic Acid in the Yeast *Blastobotrys* (*Arxula*) *adeninivorans*. *Front. Microbiol.* **8** (2017).

32. A. Yaguchi, *et al.*, Identification of oleaginous yeasts that metabolize aromatic compounds. *J. Ind. Microbiol. Biotechnol.* **47**, 801–813 (2020).

33. V. S. i Nogué, *et al.*, Integrated diesel production from lignocellulosic sugars via oleaginous yeast. *Green Chem.* **20**, 4349–4365 (2018).

34. R. J. M. Lubbers, *et al.*, A comparison between the homocyclic aromatic metabolic pathways from plant-derived compounds by bacteria and fungi. *Biotechnol. Adv.* **37**, 107396 (2019).

35. J. Mikkilä, *et al.*, Fungal Treatment Modifies Kraft Lignin for Lignin- and Cellulose-Based Carbon Fiber Precursors. *ACS Omega* **5**, 6130–6140 (2020).

36. W. Broos, *et al.*, Evaluation of Lignocellulosic Wastewater Valorization with the Oleaginous Yeasts *R. kratochvilovae* EXF7516 and *C. oleaginosum* ATCC 20509. *Fermentation* **8**, 204 (2022).

37. K. Ravi, J. García-Hidalgo, M. F. Gorwa-Grauslund, G. Lidén, Conversion of lignin model compounds by *Pseudomonas putida* KT2440 and isolates from compost. *Appl. Microbiol. Biotechnol.* **101**, 5059–5070 (2017).

38. R. J. M. Lubbers, A. Dilokpimol, J. Visser, R. P. de Vries, *Aspergillus niger* uses the peroxisomal CoA-dependent β-oxidative genes to degrade the hydroxycinnamic acids caffeic acid, ferulic acid, and *p*-coumaric acid. *Appl. Microbiol. Biotechnol.* **105**, 4199–4211 (2021).

39. H. Y. Neujahr, A. Gaal, Phenol Hydroxylase from Yeast: Sulfhydryl Groups in Phenol Hydroxylase from *Trichosporon cutaneum*. *Eur. J. Biochem.* **58**, 351–357 (1975).

40. M. Kalin, H. Y. Neujahr, R. N. Weissmahr, T. Sejlitz, J. Reiser, Phenol Hydroxylase from *Trichosporon cutaneum*: Gene Cloning, Sequence Analysis, and Functional Expression in *Eschenichia coli*. *J. Bacteriol.* **174** (1992).

41. Z. Holesova, *et al.*, Gentisate and 3-oxoadipate pathways in the yeast *Candida parapsilosis*: identification and functional analysis of the genes coding for 3-hydroxybenzoate 6-hydroxylase and 4-hydroxybenzoate 1-hydroxylase. *Microbiology* **157**, 2152–2163 (2011).

42. R. J. M. Lubbers, *et al.*, Vanillic acid and methoxyhydroquinone production from guaiacyl units and related aromatic compounds using *Aspergillus niger* cell factories. *Microb. Cell Factories* **20**, 151 (2021).

43. B. Falconnier, *et al.*, Vanillin as a product of ferulic acid biotransformation by the white-rot fungus *Pycnoporus cinnabarinus* I-937: Identification of metabolic pathways. *J. Biotechnol.* **37**, 123–132 (1994).

44. P. Guiraud, R. Steiman, F. Seigle-Murandi, J.-L. Benoit-Guyod, Metabolism of vanillic acid by Micromycetes. *World J. Microbiol. Biotechnol.* **8**, 270–275 (1992).

45. P. Ander, A. Hatakka, K.-E. Eriksson, Vanillic Acid Metabolism by the White-Rot Fungus *Sporotriehum pulverulentum*. *Arch. Microbiol.* **125**, 189–202 (1980).

46. C. Fleige, G. Hansen, J. Kroll, A. Steinbüchel, Investigation of the *Amycolatopsis* sp. Strain ATCC 39116 Vanillin Dehydrogenase and Its Impact on the Biotechnical Production of Vanillin. *Appl. Environ. Microbiol.* **79**, 81–90 (2013).

47. A. Yaguchi, “Development of *Cutaneotrichosporon oleaginosus* to Convert Lignin-Derived Phenolics to Oleochemicals” Clemson University, Clemson, SC. (2020).

48. P. Mazur, *et al.*, *Cis*,*cis*-Muconate Lactonizing Enzyme from *Trichosporon cutaneum*: Evidence for a Novel Class of Cycloisomerases in Eucaryotes. *Biochemistry* **33**, 1961–1970 (1994).

49. T. M. Martins, *et al.*, The old 3-oxoadipate pathway revisited: New insights in the catabolism of aromatics in the saprophytic fungus *Aspergillus nidulans*. *Fungal Genet. Biol.* **74**, 32–44 (2015).

50. R. J. M. Lubbers, *et al.*, Discovery and Functional Analysis of a Salicylic Acid Hydroxylase from *Aspergillus niger*. *Appl. Environ. Microbiol.* **87**, e02701-20 (2021).

51. The UniProt Consortium, UniProt: the universal protein knowledgebase in 2021. *Nucleic Acids Res.* **49**, D480–D489 (2021).

52. R. Y. Yang, *et al.*, Genome Sequence of the *Trichosporon asahii* Environmental Strain CBS 8904. *Eukaryot. Cell* **11**, 1586–1587 (2012).

53. D. Grgas, *et al.*, The Bacterial Degradation of Lignin—A Review. *Water* **15**, 1272 (2023).

54. I. Nordlund, V. Shingler, Nucleotide sequences of the *meta*-cleavage pathway enzymes 2-hydroxymuconic semialdehyde dehydrogenase and 2-hydroxymuconic semialdehyde hydrolase from *Pseudomonas* CF600. *Biochim. Biophys. Acta BBA - Gene Struct. Expr.* **1049**, 227–230 (1990).

55. J. Inoue, J. P. Shaw, M. Rekik, S. Harayama, Overlapping substrate specificities of benzaldehyde dehydrogenase (the xylC gene product) and 2-hydroxymuconic semialdehyde dehydrogenase (the xylG gene product) encoded by TOL plasmid pWW0 of *Pseudomonas putida*. *J. Bacteriol.* **177**, 1196–1201 (1995).

56. H. Kato, *et al.*, Identification and characterization of methoxy- and dimethoxyhydroquinone 1,2-dioxygenase from *Phanerochaete chrysosporium*. *Appl. Environ. Microbiol.* **90**, e01753-23 (2024).

57. X. Chen, *et al.*, The impacts of deacetylation prior to dilute acid pretreatment on the bioethanol process. *Biotechnol. Biofuels Bioprod.* **5**, 8 (2012).

58. X. Chen, *et al.*, A highly efficient dilute alkali deacetylation and mechanical (disc) refining process for the conversion of renewable biomass to lower cost sugars. *Biotechnol. Biofuels Bioprod.* **7**, 98 (2014).

59. A. Sluiter, *et al.*, “Determination of Structural Carbohydrates and Lignin in Biomass” National Renewable Energy Laboratory, Bolder, CO. NREL/TP-510-42618. (2012).

60. J. V. O’Fallon, J. R. Busboom, M. L. Nelson, C. T. Gaskins, A direct method for fatty acid methyl ester synthesis: Application to wet meat tissues, oils, and feedstuffs. *J. Anim. Sci.* **85**, 1511–1521 (2007).

61. S. Xie, S. Sun, S. Y. Dai, J. S.Yuan, Efficient coagulation of microalgae in cultures with filamentous fungi. *Algal Res.* **2**, 28–33 (2013).

62. X. Li, *et al.*, Discovery of potential pathways for biological conversion of poplar wood into lipids by co-fermentation of *Rhodococci* strains. *Biotechnol. Biofuels Bioprod.* **12**, 60 (2019).

63. C. A. Schneider, W. S. Rasband, K. W. Eliceiri, NIH Image to ImageJ: 25 years of image analysis. *Nat. Methods* **9**, 671–675 (2012).

64. X. Li, *et al.*, Inhibitory effects of lignin on enzymatic hydrolysis: The role of lignin chemistry and molecular weight. *Renew. Energy* **123**, 664–674 (2018).

65. X. Li, M. Li, Y. Pu, A. J. Ragauskas, Y. Zheng, Simultaneous depolymerization and fermentation of lignin into value-added products by the marine protist, *Thraustochytrium striatum*. *Algal Res.* **46**, 101773 (2020).

66. C. Stringer, T. Wang, M. Michaelos, M. Pachitariu, Cellpose: a generalist algorithm for cellular segmentation. *Nat. Methods* **18**, 100–106 (2021).

67. C. S. Hughes, *et al.*, Ultrasensitive proteome analysis using paramagnetic bead technology. *Mol. Syst. Biol.* **10**, 757 (2014).

68. Z. Xu, *et al.*, Understanding of bacterial lignin extracellular degradation mechanisms by *Pseudomonas putida* KT2440 via secretomic analysis. *Biotechnol. Biofuels Bioprod.* **15**, 117 (2022).

69. J. Cox, *et al.*, Accurate Proteome-wide Label-free Quantification by Delayed Normalization and Maximal Peptide Ratio Extraction, Termed MaxLFQ. *Mol. Cell. Proteomics MCP* **13**, 2513–2526 (2014).

70. D. Close, J. Ojumu, Draft Genome Sequence of the Oleaginous Yeast *Cryptococcus curvatus* ATCC 20509. *Genome Announc.* **4**, 10.1128/genomea.01235-16 (2016).

71. Y. Zhu, *et al.*, DEqMS: A Method for Accurate Variance Estimation in Differential Protein Expression Analysis. *Mol. Cell. Proteomics* **19**, 1047–1057 (2020).

72. X. Zhang, *et al.*, Proteome-wide identification of ubiquitin interactions using UbIA-MS. *Nat. Protoc.* **13**, 530–550 (2018).

73. M. E. Ritchie, *et al.*, limma powers differential expression analyses for RNA-sequencing and microarray studies. *Nucleic Acids Res.* **43**, e47 (2015).

74. C. P. Cantalapiedra, A. Hernández-Plaza, I. Letunic, P. Bork, J. Huerta-Cepas, eggNOG-mapper v2: Functional Annotation, Orthology Assignments, and Domain Prediction at the Metagenomic Scale. *Mol. Biol. Evol.* **38**, 5825–5829 (2021).

75. F. Teufel, *et al.*, SignalP 6.0 predicts all five types of signal peptides using protein language models. *Nat. Biotechnol.* **40**, 1023–1025 (2022).

76. K. Barrett, C. J. Hunt, L. Lange, A. S. Meyer, Conserved unique peptide patterns (CUPP) online platform: peptide-based functional annotation of carbohydrate active enzymes. *Nucleic Acids Res.* **48**, W110–W115 (2020).

77. C. Camacho, *et al.*, BLAST+: architecture and applications. *BMC Bioinformatics* **10**, 421 (2009).

78. H. Nordberg, *et al.*, The genome portal of the Department of Energy Joint Genome Institute: 2014 updates. *Nucleic Acids Res.* **42**, D26–D31 (2014).

79. Y. Jiang, *et al.*, MULocDeep: A deep-learning framework for protein subcellular and suborganellar localization prediction with residue-level interpretation. *Comput. Struct. Biotechnol. J.* **19**, 4825–4839 (2021).

80. V. Thumuluri, J. J. Almagro Armenteros, A. R. Johansen, H. Nielsen, O. Winther, DeepLoc 2.0: multi-label subcellular localization prediction using protein language models. *Nucleic Acids Res.* **50**, W228–W234 (2022).

81. G. Neuberger, S. Maurer-Stroh, B. Eisenhaber, A. Hartig, F. Eisenhaber, Prediction of Peroxisomal Targeting Signal 1 Containing Proteins from Amino Acid Sequence. *J. Mol. Biol.* **328**, 581–592 (2003).

82. T. Paysan-Lafosse, *et al.*, InterPro in 2022. *Nucleic Acids Res.* **51**, D418–D427 (2023).

83. J. Wang, *et al.*, The conserved domain database in 2023. *Nucleic Acids Res.* **51**, D384–D388 (2023).

84. M. Kanehisa, M. Furumichi, Y. Sato, M. Kawashima, M. Ishiguro-Watanabe, KEGG for taxonomy-based analysis of pathways and genomes. *Nucleic Acids Res.* **51**, D587–D592 (2023).

85. T. Wu, *et al.*, clusterProfiler 4.0: A universal enrichment tool for interpreting omics data. *The Innovation* **2** (2021).

86. H. Wickham, *ggplot2: Elegant Graphics for Data Analysis* (Springer-Verlag, 2016).
